# Supplementary material
Source: MDPI journal article supplement (https://www.mdpi.com/2073-4352/13/8/1239)
Supplement: s1 [file s1]

Archive with 5 entries (5 files):
- SF1_CIF of 5a.cif
- SF2_CIF of 5b & 6.cif
- SF3_CheckCIF of 5a.pdf
- SF4_Check CIF of 5b & 6.pdf
- Supplementary Figures.pdf
