# Supplementary material
Source: MDPI journal article supplement (https://www.mdpi.com/2073-4352/13/8/1239)
Supplement: s1 [file s1 › SF1_CIF of 5a.cif]

 
data_bmk1943
 
_audit_creation_method            'SHELXL-2018/1'
_shelx_SHELXL_version_number      '2018/1'
_chemical_name_systematic         ?
_chemical_name_common             ?
_chemical_melting_point           ?
_chemical_formula_moiety          ?
_chemical_formula_sum
 'C24 H18 N2 O2 S' 
_chemical_formula_weight          398.46

loop_
 _atom_type_symbol
 _atom_type_description
 _atom_type_scat_dispersion_real
 _atom_type_scat_dispersion_imag
 _atom_type_scat_source
 'C'  'C'   0.0033   0.0016
 'International Tables Vol C Tables 4.2.6.8 and 6.1.1.4'
 'H'  'H'   0.0000   0.0000
 'International Tables Vol C Tables 4.2.6.8 and 6.1.1.4'
 'N'  'N'   0.0061   0.0033
 'International Tables Vol C Tables 4.2.6.8 and 6.1.1.4'
 'O'  'O'   0.0106   0.0060
 'International Tables Vol C Tables 4.2.6.8 and 6.1.1.4'
 'S'  'S'   0.1246   0.1234
 'International Tables Vol C Tables 4.2.6.8 and 6.1.1.4'
 
_space_group_crystal_system       orthorhombic
_space_group_IT_number            19
_space_group_name_H-M_alt         'P 21 21 21'
_space_group_name_Hall            'P 2ac 2ab'
 
_shelx_space_group_comment
;
The symmetry employed for this shelxl refinement is uniquely defined
by the following loop, which should always be used as a source of
symmetry information in preference to the above space-group names.
They are only intended as comments.
;
 
loop_
 _space_group_symop_operation_xyz
 'x, y, z'
 '-x+1/2, -y, z+1/2'
 '-x, y+1/2, -z+1/2'
 'x+1/2, -y+1/2, -z'
 
_cell_length_a                    5.5731(5)
_cell_length_b                    10.2520(9)
_cell_length_c                    34.307(3)
_cell_angle_alpha                 90
_cell_angle_beta                  90
_cell_angle_gamma                 90
_cell_volume                      1960.1(3)
_cell_formula_units_Z             4
_cell_measurement_temperature     296(2)
_cell_measurement_reflns_used   4008
_cell_measurement_theta_min     4.0330
_cell_measurement_theta_max     24.4340
 
_exptl_crystal_description        needle
_exptl_crystal_colour             ?
_exptl_crystal_density_meas       ?
_exptl_crystal_density_method     ?
_exptl_crystal_density_diffrn     1.350          
_exptl_crystal_F_000              832
_exptl_transmission_factor_min    ?
_exptl_transmission_factor_max    ?
_exptl_crystal_size_max           0.392
_exptl_crystal_size_mid           0.090
_exptl_crystal_size_min           0.049
_exptl_absorpt_coefficient_mu     0.188
_shelx_estimated_absorpt_T_min    0.930
_shelx_estimated_absorpt_T_max    0.991
_exptl_absorpt_correction_T_min                     0.295
_exptl_absorpt_correction_T_max                     1.000
_exptl_absorpt_correction_type            gaussian
_exptl_absorpt_process_details
;
CrysAlisPro 1.171.40.50a (Rigaku Oxford Diffraction, 2019)
Numerical absorption correction based on gaussian integration over
			a multifaceted crystal model
Empirical absorption correction using spherical harmonics,
 implemented in SCALE3 ABSPACK scaling algorithm.
;
_diffrn_ambient_temperature       296(2)
_diffrn_radiation_wavelength      0.71073
_diffrn_radiation_type            MoK\a
_diffrn_source                    ?
_diffrn_measurement_device_type 'SuperNova, Dual, Cu at home/near, Atlas'
_diffrn_measurement_method '\w scans'
_diffrn_detector_area_resol_mean  ?
_diffrn_reflns_number             16408
_diffrn_reflns_av_unetI/netI      0.0587
_diffrn_reflns_av_R_equivalents   0.0497
_diffrn_reflns_limit_h_min        -7
_diffrn_reflns_limit_h_max        6
_diffrn_reflns_limit_k_min        -11
_diffrn_reflns_limit_k_max        13
_diffrn_reflns_limit_l_min        -46
_diffrn_reflns_limit_l_max        43
_diffrn_reflns_theta_min          3.563
_diffrn_reflns_theta_max          29.825
_diffrn_reflns_theta_full         25.242
_diffrn_measured_fraction_theta_max   0.900
_diffrn_measured_fraction_theta_full  0.997
_diffrn_reflns_Laue_measured_fraction_max    0.900
_diffrn_reflns_Laue_measured_fraction_full   0.997
_diffrn_reflns_point_group_measured_fraction_max   0.866
_diffrn_reflns_point_group_measured_fraction_full  0.998
_reflns_number_total              4878
_reflns_number_gt                 3398
_reflns_threshold_expression      'I > 2\s(I)'
_reflns_Friedel_coverage          0.662
_reflns_Friedel_fraction_max      0.819
_reflns_Friedel_fraction_full     1.000
 
_reflns_special_details
;
 Reflections were merged by SHELXL according to the crystal
 class for the calculation of statistics and refinement.
 
 _reflns_Friedel_fraction is defined as the number of unique
 Friedel pairs measured divided by the number that would be
 possible theoretically, ignoring centric projections and
 systematic absences.
;
 
_computing_data_collection     'CrysAlisPro 1.171.40.50a (Rigaku OD, 2019)'
_computing_cell_refinement     'CrysAlisPro 1.171.40.50a (Rigaku OD, 2019)'
_computing_data_reduction      'CrysAlisPro 1.171.40.50a (Rigaku OD, 2019)'
_computing_structure_solution   'SHELXT'
_computing_structure_refinement 'SHELXL-2018/1 (Sheldrick, 2018)'
_computing_molecular_graphics     ?
_computing_publication_material   ?
_refine_special_details           ?
_refine_ls_structure_factor_coef  Fsqd
_refine_ls_matrix_type            full
_refine_ls_weighting_scheme       calc
_refine_ls_weighting_details
'w=1/[\s^2^(Fo^2^)+(0.0350P)^2^+0.4990P] where P=(Fo^2^+2Fc^2^)/3'
_atom_sites_solution_primary      ?
_atom_sites_solution_secondary    ?
_atom_sites_solution_hydrogens    geom
_refine_ls_hydrogen_treatment     constr
_refine_ls_extinction_method      none
_refine_ls_extinction_coef        .
_refine_ls_abs_structure_details
;
 Flack x determined using 1055 quotients [(I+)-(I-)]/[(I+)+(I-)]
 (Parsons, Flack and Wagner, Acta Cryst. B69 (2013) 249-259).
;
_refine_ls_abs_structure_Flack    -0.03(5)
_chemical_absolute_configuration  ?
_refine_ls_number_reflns          4878
_refine_ls_number_parameters      263
_refine_ls_number_restraints      0
_refine_ls_R_factor_all           0.0843
_refine_ls_R_factor_gt            0.0502
_refine_ls_wR_factor_ref          0.1143
_refine_ls_wR_factor_gt           0.0988
_refine_ls_goodness_of_fit_ref    1.055
_refine_ls_restrained_S_all       1.055
_refine_ls_shift/su_max           0.000
_refine_ls_shift/su_mean          0.000
 
loop_
 _atom_site_label
 _atom_site_type_symbol
 _atom_site_fract_x
 _atom_site_fract_y
 _atom_site_fract_z
 _atom_site_U_iso_or_equiv
 _atom_site_adp_type
 _atom_site_occupancy
 _atom_site_site_symmetry_order  
 _atom_site_calc_flag
 _atom_site_refinement_flags_posn
 _atom_site_refinement_flags_adp
 _atom_site_refinement_flags_occupancy
 _atom_site_disorder_assembly
 _atom_site_disorder_group
C1 C 1.0646(7) 0.4830(3) 0.46524(10) 0.0403(8) Uani 1 1 d . . . . .
C2 C 1.2395(8) 0.4617(4) 0.49300(10) 0.0518(10) Uani 1 1 d . . . . .
H2 H 1.253037 0.513913 0.515064 0.062 Uiso 1 1 calc R U . . .
C3 C 1.3932(7) 0.3587(4) 0.48622(11) 0.0559(10) Uani 1 1 d . . . . .
H3 H 1.513485 0.340504 0.504203 0.067 Uiso 1 1 calc R U . . .
C4 C 1.3721(8) 0.2819(4) 0.45318(11) 0.0566(11) Uani 1 1 d . . . . .
H4 H 1.479689 0.213710 0.449343 0.068 Uiso 1 1 calc R U . . .
C5 C 1.1960(7) 0.3039(4) 0.42595(10) 0.0507(9) Uani 1 1 d . . . . .
H5 H 1.181978 0.250797 0.404099 0.061 Uiso 1 1 calc R U . . .
C6 C 1.0389(6) 0.4079(3) 0.43186(9) 0.0411(8) Uani 1 1 d . . . . .
C7 C 0.8440(7) 0.4655(3) 0.41086(9) 0.0420(8) Uani 1 1 d . . . . .
H7 H 0.781115 0.436337 0.387309 0.050 Uiso 1 1 calc R U . . .
C8 C 0.7680(6) 0.5697(3) 0.43138(8) 0.0367(7) Uani 1 1 d . . . . .
C9 C 0.5856(6) 0.6697(3) 0.42692(9) 0.0373(8) Uani 1 1 d . . . . .
C10 C 0.5099(7) 0.7500(4) 0.45501(9) 0.0448(9) Uani 1 1 d . . . . .
H10 H 0.566124 0.746535 0.480513 0.054 Uiso 1 1 calc R U . . .
C11 C 0.3203(6) 0.8003(3) 0.39081(9) 0.0375(8) Uani 1 1 d . . . . .
C12 C 0.5250(6) 0.6250(3) 0.35536(8) 0.0342(7) Uani 1 1 d . . . . .
C13 C 0.7320(6) 0.6493(3) 0.33471(9) 0.0418(8) Uani 1 1 d . . . . .
H13 H 0.837695 0.713741 0.343013 0.050 Uiso 1 1 calc R U . . .
C14 C 0.7822(7) 0.5777(4) 0.30166(9) 0.0461(9) Uani 1 1 d . . . . .
H14 H 0.922845 0.593454 0.287842 0.055 Uiso 1 1 calc R U . . .
C15 C 0.6242(7) 0.4826(4) 0.28898(9) 0.0466(9) Uani 1 1 d . . . . .
C16 C 0.4153(7) 0.4601(4) 0.30927(10) 0.0490(9) Uani 1 1 d . . . . .
H16 H 0.307077 0.397354 0.300612 0.059 Uiso 1 1 calc R U . . .
C17 C 0.3671(6) 0.5313(3) 0.34264(9) 0.0425(8) Uani 1 1 d . . . . .
H17 H 0.226775 0.515666 0.356546 0.051 Uiso 1 1 calc R U . . .
C18 C 0.0710(7) 0.9519(3) 0.35860(10) 0.0434(9) Uani 1 1 d . . . . .
C19 C 0.1012(8) 1.0418(4) 0.32873(12) 0.0621(12) Uani 1 1 d . . . . .
H19 H 0.228779 1.033093 0.311463 0.075 Uiso 1 1 calc R U . . .
C20 C -0.0582(9) 1.1444(5) 0.32460(14) 0.0732(13) Uani 1 1 d . . . . .
H20 H -0.034954 1.204825 0.304740 0.088 Uiso 1 1 calc R U . . .
C21 C -0.2488(9) 1.1583(4) 0.34920(14) 0.0711(13) Uani 1 1 d . . . . .
H21 H -0.356496 1.226715 0.345903 0.085 Uiso 1 1 calc R U . . .
C22 C -0.2796(8) 1.0699(4) 0.37892(13) 0.0642(12) Uani 1 1 d . . . . .
H22 H -0.408554 1.078939 0.395909 0.077 Uiso 1 1 calc R U . . .
C23 C -0.1202(7) 0.9677(4) 0.38375(11) 0.0513(10) Uani 1 1 d . . . . .
H23 H -0.142138 0.909033 0.404120 0.062 Uiso 1 1 calc R U . . .
C24 C 0.5308(12) 0.3233(5) 0.24018(15) 0.101(2) Uani 1 1 d . . . . .
H24A H 0.499887 0.255073 0.258674 0.152 Uiso 1 1 calc R U . . .
H24B H 0.598871 0.286485 0.216944 0.152 Uiso 1 1 calc R U . . .
H24C H 0.383280 0.366747 0.233863 0.152 Uiso 1 1 calc R U . . .
N1 N 0.4735(5) 0.6939(3) 0.39103(7) 0.0393(7) Uani 1 1 d . . . . .
N2 N 0.2301(5) 0.8442(3) 0.35931(8) 0.0422(7) Uani 1 1 d . . . . .
O1 O 0.8982(5) 0.5821(2) 0.46566(6) 0.0445(6) Uani 1 1 d . . . . .
O2 O 0.6962(6) 0.4155(3) 0.25673(8) 0.0767(9) Uani 1 1 d . . . . .
S1 S 0.29703(18) 0.86077(9) 0.43931(2) 0.0486(3) Uani 1 1 d . . . . .
 
loop_
 _atom_site_aniso_label
 _atom_site_aniso_U_11
 _atom_site_aniso_U_22
 _atom_site_aniso_U_33
 _atom_site_aniso_U_23
 _atom_site_aniso_U_13
 _atom_site_aniso_U_12
C1 0.042(2) 0.040(2) 0.0391(18) 0.0067(14) 0.0004(15) 0.0035(16)
C2 0.052(3) 0.060(2) 0.044(2) 0.0060(16) -0.0096(18) 0.001(2)
C3 0.044(2) 0.067(3) 0.057(2) 0.019(2) -0.0071(18) 0.005(2)
C4 0.053(3) 0.059(2) 0.057(2) 0.0136(19) 0.0072(19) 0.018(2)
C5 0.056(2) 0.052(2) 0.044(2) 0.0021(16) 0.0031(18) 0.013(2)
C6 0.043(2) 0.0444(19) 0.0356(18) 0.0055(14) 0.0022(15) 0.0013(16)
C7 0.049(2) 0.045(2) 0.0319(17) -0.0006(14) -0.0035(15) -0.0004(17)
C8 0.045(2) 0.0404(18) 0.0243(15) 0.0001(12) -0.0038(14) -0.0013(16)
C9 0.044(2) 0.0372(19) 0.0312(16) 0.0005(13) -0.0011(14) -0.0023(15)
C10 0.056(2) 0.048(2) 0.0304(17) -0.0052(15) -0.0026(16) 0.0030(18)
C11 0.039(2) 0.0384(18) 0.0345(17) -0.0046(13) 0.0031(15) 0.0019(16)
C12 0.0380(18) 0.0355(18) 0.0292(15) -0.0017(13) -0.0017(13) 0.0042(15)
C13 0.040(2) 0.0435(19) 0.0416(18) -0.0048(14) -0.0031(15) -0.0051(18)
C14 0.044(2) 0.059(2) 0.0355(17) -0.0014(15) 0.0066(16) -0.005(2)
C15 0.060(3) 0.050(2) 0.0300(17) -0.0072(15) 0.0034(16) 0.0047(19)
C16 0.053(2) 0.047(2) 0.046(2) -0.0111(17) -0.0031(18) -0.0106(19)
C17 0.041(2) 0.047(2) 0.0394(18) -0.0037(15) 0.0047(15) -0.0013(17)
C18 0.043(2) 0.040(2) 0.047(2) -0.0027(15) -0.0071(17) 0.0018(17)
C19 0.057(3) 0.065(3) 0.065(3) 0.011(2) 0.001(2) 0.010(2)
C20 0.073(3) 0.062(3) 0.084(3) 0.022(2) -0.010(3) 0.007(3)
C21 0.064(3) 0.048(3) 0.102(4) 0.000(2) -0.015(3) 0.015(2)
C22 0.052(3) 0.055(3) 0.086(3) -0.011(2) 0.003(2) 0.010(2)
C23 0.050(3) 0.048(2) 0.056(2) -0.0013(18) 0.0056(18) 0.0049(19)
C24 0.141(5) 0.098(4) 0.064(3) -0.045(3) 0.014(3) -0.028(4)
N1 0.0441(18) 0.0434(16) 0.0306(14) -0.0036(11) -0.0025(12) 0.0058(14)
N2 0.0421(17) 0.0443(16) 0.0402(15) -0.0005(12) -0.0034(13) 0.0073(15)
O1 0.0529(16) 0.0450(14) 0.0356(12) -0.0044(10) -0.0082(11) 0.0054(12)
O2 0.096(2) 0.083(2) 0.0515(16) -0.0308(15) 0.0168(16) -0.008(2)
S1 0.0571(6) 0.0508(5) 0.0380(4) -0.0073(4) 0.0028(4) 0.0108(5)
 
_geom_special_details
;
 All esds (except the esd in the dihedral angle between two l.s. planes)
 are estimated using the full covariance matrix.  The cell esds are taken
 into account individually in the estimation of esds in distances, angles
 and torsion angles; correlations between esds in cell parameters are only
 used when they are defined by crystal symmetry.  An approximate (isotropic)
 treatment of cell esds is used for estimating esds involving l.s. planes.
;
 
loop_
 _geom_bond_atom_site_label_1
 _geom_bond_atom_site_label_2
 _geom_bond_distance
 _geom_bond_site_symmetry_2
 _geom_bond_publ_flag
C1 O1 1.376(4) . ?
C1 C2 1.380(5) . ?
C1 C6 1.387(5) . ?
C2 C3 1.379(6) . ?
C2 H2 0.9300 . ?
C3 C4 1.386(6) . ?
C3 H3 0.9300 . ?
C4 C5 1.373(5) . ?
C4 H4 0.9300 . ?
C5 C6 1.394(5) . ?
C5 H5 0.9300 . ?
C6 C7 1.431(5) . ?
C7 C8 1.347(4) . ?
C7 H7 0.9300 . ?
C8 O1 1.387(4) . ?
C8 C9 1.452(5) . ?
C9 C10 1.335(4) . ?
C9 N1 1.403(4) . ?
C10 S1 1.729(4) . ?
C10 H10 0.9300 . ?
C11 N2 1.274(4) . ?
C11 N1 1.385(4) . ?
C11 S1 1.780(3) . ?
C12 C17 1.374(5) . ?
C12 C13 1.377(5) . ?
C12 N1 1.442(4) . ?
C13 C14 1.379(4) . ?
C13 H13 0.9300 . ?
C14 C15 1.384(5) . ?
C14 H14 0.9300 . ?
C15 O2 1.363(4) . ?
C15 C16 1.376(5) . ?
C16 C17 1.384(5) . ?
C16 H16 0.9300 . ?
C17 H17 0.9300 . ?
C18 C23 1.381(5) . ?
C18 C19 1.388(5) . ?
C18 N2 1.416(4) . ?
C19 C20 1.384(6) . ?
C19 H19 0.9300 . ?
C20 C21 1.364(7) . ?
C20 H20 0.9300 . ?
C21 C22 1.375(6) . ?
C21 H21 0.9300 . ?
C22 C23 1.384(5) . ?
C22 H22 0.9300 . ?
C23 H23 0.9300 . ?
C24 O2 1.437(6) . ?
C24 H24A 0.9600 . ?
C24 H24B 0.9600 . ?
C24 H24C 0.9600 . ?
 
loop_
 _geom_angle_atom_site_label_1
 _geom_angle_atom_site_label_2
 _geom_angle_atom_site_label_3
 _geom_angle
 _geom_angle_site_symmetry_1
 _geom_angle_site_symmetry_3
 _geom_angle_publ_flag
O1 C1 C2 125.9(3) . . ?
O1 C1 C6 110.4(3) . . ?
C2 C1 C6 123.7(3) . . ?
C3 C2 C1 116.3(3) . . ?
C3 C2 H2 121.8 . . ?
C1 C2 H2 121.8 . . ?
C2 C3 C4 121.4(3) . . ?
C2 C3 H3 119.3 . . ?
C4 C3 H3 119.3 . . ?
C5 C4 C3 121.6(4) . . ?
C5 C4 H4 119.2 . . ?
C3 C4 H4 119.2 . . ?
C4 C5 C6 118.4(3) . . ?
C4 C5 H5 120.8 . . ?
C6 C5 H5 120.8 . . ?
C1 C6 C5 118.7(3) . . ?
C1 C6 C7 105.4(3) . . ?
C5 C6 C7 136.0(3) . . ?
C8 C7 C6 107.6(3) . . ?
C8 C7 H7 126.2 . . ?
C6 C7 H7 126.2 . . ?
C7 C8 O1 110.6(3) . . ?
C7 C8 C9 136.4(3) . . ?
O1 C8 C9 113.0(3) . . ?
C10 C9 N1 112.6(3) . . ?
C10 C9 C8 125.5(3) . . ?
N1 C9 C8 121.9(3) . . ?
C9 C10 S1 113.4(3) . . ?
C9 C10 H10 123.3 . . ?
S1 C10 H10 123.3 . . ?
N2 C11 N1 121.8(3) . . ?
N2 C11 S1 129.8(3) . . ?
N1 C11 S1 108.3(2) . . ?
C17 C12 C13 120.0(3) . . ?
C17 C12 N1 119.0(3) . . ?
C13 C12 N1 121.0(3) . . ?
C12 C13 C14 119.8(3) . . ?
C12 C13 H13 120.1 . . ?
C14 C13 H13 120.1 . . ?
C13 C14 C15 120.3(3) . . ?
C13 C14 H14 119.9 . . ?
C15 C14 H14 119.9 . . ?
O2 C15 C16 125.1(4) . . ?
O2 C15 C14 115.0(3) . . ?
C16 C15 C14 119.8(3) . . ?
C15 C16 C17 119.6(3) . . ?
C15 C16 H16 120.2 . . ?
C17 C16 H16 120.2 . . ?
C12 C17 C16 120.5(3) . . ?
C12 C17 H17 119.8 . . ?
C16 C17 H17 119.8 . . ?
C23 C18 C19 118.5(4) . . ?
C23 C18 N2 124.3(3) . . ?
C19 C18 N2 117.0(3) . . ?
C20 C19 C18 120.2(4) . . ?
C20 C19 H19 119.9 . . ?
C18 C19 H19 119.9 . . ?
C21 C20 C19 121.1(4) . . ?
C21 C20 H20 119.5 . . ?
C19 C20 H20 119.5 . . ?
C20 C21 C22 119.2(4) . . ?
C20 C21 H21 120.4 . . ?
C22 C21 H21 120.4 . . ?
C21 C22 C23 120.5(4) . . ?
C21 C22 H22 119.7 . . ?
C23 C22 H22 119.7 . . ?
C18 C23 C22 120.6(4) . . ?
C18 C23 H23 119.7 . . ?
C22 C23 H23 119.7 . . ?
O2 C24 H24A 109.5 . . ?
O2 C24 H24B 109.5 . . ?
H24A C24 H24B 109.5 . . ?
O2 C24 H24C 109.5 . . ?
H24A C24 H24C 109.5 . . ?
H24B C24 H24C 109.5 . . ?
C11 N1 C9 114.7(3) . . ?
C11 N1 C12 120.3(3) . . ?
C9 N1 C12 124.7(3) . . ?
C11 N2 C18 122.5(3) . . ?
C1 O1 C8 106.0(2) . . ?
C15 O2 C24 117.6(4) . . ?
C10 S1 C11 90.71(16) . . ?
 
loop_
 _geom_hbond_atom_site_label_D 
 _geom_hbond_atom_site_label_H 
 _geom_hbond_atom_site_label_A 
 _geom_hbond_distance_DH 
 _geom_hbond_distance_HA 
 _geom_hbond_distance_DA 
 _geom_hbond_angle_DHA 
 _geom_hbond_site_symmetry_A 
 _geom_hbond_publ_flag
C13 H13 N2  0.93 2.62 3.523(5) 162.8 1_655 yes
C2 H2 S1  0.93 3.25 3.845(4) 123.8 4_566 yes
C10 H10 O1  0.93 2.72 3.280(4) 120.0 4_466 yes
C19 H19 O2  0.93 2.66 3.398(5) 136.3 3_655 yes
 
_refine_diff_density_max    0.195
_refine_diff_density_min   -0.214
_refine_diff_density_rms    0.046

_shelx_res_file
;
TITL bmk1943 in P2(1)2(1)2(1)
    shelx.res
    created by SHELXL-2018/1 at 09:32:14 on 06-Jul-2023
CELL  0.71073   5.5731  10.2520  34.3068   90.000   90.000   90.000
ZERR     4.00   0.0005   0.0009   0.0028    0.000    0.000    0.000
LATT  -1
SYMM  1/2 - X, - Y, 1/2 + Z
SYMM  - X, 1/2 + Y, 1/2 - Z
SYMM  1/2 + X, 1/2 - Y, - Z
SFAC  C    H    N    O    S
UNIT  96 72 8 8 4
MERG   2
MPLA C1 C2 C3 C4 C5 C6 C7 C8 O1
MPLA C9 C10 C11 N1 S1
MPLA C12 C13 C14 C15 C16 C17 C24 O2
MPLA C9 C10 C11 N1 S1
MPLA C18 C19 C20 C21 C22 C23 N2
EQIV $1 x+1, y, z
HTAB C13 N2_$1
EQIV $2 x+1/2, -y+3/2, -z+1
HTAB C2 S1_$2
EQIV $3 x-1/2, -y+3/2, -z+1
HTAB C10 O1_$3
FMAP   2
PLAN   10
SIZE     0.049   0.090   0.392
ACTA
BOND   $H
LIST   4
L.S.   4
TEMP    23.00
WGHT    0.035000    0.499000
FVAR       2.60990
C1    1    1.064575    0.482991    0.465242    11.00000    0.04155    0.04012 =
         0.03912    0.00671    0.00040    0.00350
C2    1    1.239532    0.461701    0.493005    11.00000    0.05183    0.05954 =
         0.04408    0.00598   -0.00961    0.00115
AFIX  43
H2    2    1.253037    0.513913    0.515064    11.00000   -1.20000
AFIX   0
C3    1    1.393189    0.358731    0.486222    11.00000    0.04378    0.06655 =
         0.05750    0.01856   -0.00715    0.00515
AFIX  43
H3    2    1.513485    0.340504    0.504203    11.00000   -1.20000
AFIX   0
C4    1    1.372096    0.281854    0.453176    11.00000    0.05343    0.05904 =
         0.05739    0.01358    0.00716    0.01805
AFIX  43
H4    2    1.479689    0.213710    0.449343    11.00000   -1.20000
AFIX   0
C5    1    1.196048    0.303923    0.425953    11.00000    0.05585    0.05234 =
         0.04381    0.00207    0.00305    0.01321
AFIX  43
H5    2    1.181978    0.250797    0.404099    11.00000   -1.20000
AFIX   0
C6    1    1.038914    0.407890    0.431865    11.00000    0.04315    0.04444 =
         0.03562    0.00545    0.00224    0.00128
C7    1    0.843971    0.465514    0.410858    11.00000    0.04899    0.04526 =
         0.03189   -0.00063   -0.00352   -0.00041
AFIX  43
H7    2    0.781115    0.436337    0.387309    11.00000   -1.20000
AFIX   0
C8    1    0.768019    0.569684    0.431381    11.00000    0.04543    0.04042 =
         0.02434    0.00014   -0.00384   -0.00129
C9    1    0.585634    0.669740    0.426920    11.00000    0.04360    0.03717 =
         0.03122    0.00047   -0.00112   -0.00228
C10   1    0.509892    0.749953    0.455011    11.00000    0.05555    0.04831 =
         0.03040   -0.00517   -0.00256    0.00303
AFIX  43
H10   2    0.566124    0.746535    0.480513    11.00000   -1.20000
AFIX   0
C11   1    0.320266    0.800265    0.390813    11.00000    0.03945    0.03843 =
         0.03448   -0.00460    0.00308    0.00187
C12   1    0.525016    0.624984    0.355361    11.00000    0.03801    0.03552 =
         0.02921   -0.00170   -0.00167    0.00419
C13   1    0.732026    0.649271    0.334706    11.00000    0.04037    0.04349 =
         0.04159   -0.00476   -0.00307   -0.00506
AFIX  43
H13   2    0.837695    0.713741    0.343013    11.00000   -1.20000
AFIX   0
C14   1    0.782238    0.577727    0.301664    11.00000    0.04414    0.05885 =
         0.03546   -0.00137    0.00663   -0.00485
AFIX  43
H14   2    0.922845    0.593454    0.287842    11.00000   -1.20000
AFIX   0
C15   1    0.624188    0.482575    0.288980    11.00000    0.05967    0.05000 =
         0.03001   -0.00719    0.00337    0.00475
C16   1    0.415259    0.460059    0.309266    11.00000    0.05333    0.04721 =
         0.04648   -0.01108   -0.00312   -0.01062
AFIX  43
H16   2    0.307077    0.397354    0.300612    11.00000   -1.20000
AFIX   0
C17   1    0.367087    0.531318    0.342637    11.00000    0.04090    0.04709 =
         0.03936   -0.00368    0.00473   -0.00127
AFIX  43
H17   2    0.226775    0.515666    0.356546    11.00000   -1.20000
AFIX   0
C18   1    0.071049    0.951906    0.358597    11.00000    0.04296    0.04029 =
         0.04687   -0.00271   -0.00713    0.00182
C19   1    0.101170    1.041825    0.328735    11.00000    0.05653    0.06465 =
         0.06519    0.01122    0.00141    0.01027
AFIX  43
H19   2    0.228779    1.033093    0.311463    11.00000   -1.20000
AFIX   0
C20   1   -0.058178    1.144400    0.324604    11.00000    0.07334    0.06201 =
         0.08428    0.02245   -0.01027    0.00705
AFIX  43
H20   2   -0.034954    1.204825    0.304740    11.00000   -1.20000
AFIX   0
C21   1   -0.248774    1.158316    0.349197    11.00000    0.06400    0.04753 =
         0.10170    0.00048   -0.01544    0.01547
AFIX  43
H21   2   -0.356496    1.226715    0.345903    11.00000   -1.20000
AFIX   0
C22   1   -0.279594    1.069939    0.378916    11.00000    0.05166    0.05506 =
         0.08591   -0.01150    0.00268    0.00959
AFIX  43
H22   2   -0.408554    1.078939    0.395909    11.00000   -1.20000
AFIX   0
C23   1   -0.120213    0.967674    0.383746    11.00000    0.05001    0.04751 =
         0.05649   -0.00135    0.00565    0.00492
AFIX  43
H23   2   -0.142138    0.909033    0.404120    11.00000   -1.20000
AFIX   0
C24   1    0.530836    0.323299    0.240179    11.00000    0.14061    0.09821 =
         0.06425   -0.04539    0.01395   -0.02835
AFIX 137
H24A  2    0.499887    0.255073    0.258674    11.00000   -1.50000
H24B  2    0.598871    0.286485    0.216944    11.00000   -1.50000
H24C  2    0.383280    0.366747    0.233863    11.00000   -1.50000
AFIX   0
N1    3    0.473528    0.693922    0.391033    11.00000    0.04407    0.04337 =
         0.03057   -0.00360   -0.00250    0.00583
N2    3    0.230112    0.844244    0.359315    11.00000    0.04208    0.04428 =
         0.04018   -0.00048   -0.00344    0.00726
O1    4    0.898154    0.582131    0.465656    11.00000    0.05285    0.04503 =
         0.03562   -0.00436   -0.00819    0.00535
O2    4    0.696200    0.415498    0.256727    11.00000    0.09563    0.08313 =
         0.05145   -0.03080    0.01684   -0.00828
S1    5    0.297035    0.860766    0.439306    11.00000    0.05709    0.05075 =
         0.03802   -0.00730    0.00276    0.01082
HKLF    4


REM  bmk1943 in P2(1)2(1)2(1)
REM R1 =  0.0502 for    3398 Fo > 4sig(Fo)  and  0.0843 for all    4878 data
REM    263 parameters refined using      0 restraints

END

WGHT      0.0350      0.4989

REM Highest difference peak  0.195,  deepest hole -0.214,  1-sigma level  0.046
Q1    1   0.1474  0.6663  0.3328  11.00000  0.05    0.20
Q2    1   0.1674  0.7637  0.4417  11.00000  0.05    0.19
Q3    1  -0.0208  1.0249  0.2690  11.00000  0.05    0.19
Q4    1  -0.2089  0.8778  0.4109  11.00000  0.05    0.19
Q5    1   1.0840  0.4705  0.4411  11.00000  0.05    0.19
Q6    1   0.4407  0.7762  0.4403  11.00000  0.05    0.18
Q7    1   1.2092  0.4642  0.4150  11.00000  0.05    0.18
Q8    1   1.5646  0.3813  0.4363  11.00000  0.05    0.17
Q9    1   1.4030  0.2006  0.4085  11.00000  0.05    0.16
Q10   1   0.7031  0.4823  0.4229  11.00000  0.05    0.16
;
_shelx_res_checksum   86946

_shelx_hkl_file
;
   0   0  -6 1987.02 93.5719   2
   0   0  -7 769.710 67.3079   2
   0   0  -8 17719.9 301.504   2
   0   0   9 569.364 114.415   1
   0   0  -9 259.337 67.4918   2
   0   0  10 62196.4 900.467   1
   0   0 -10 63986.9 634.567   2
   0   0  11 867.917 132.825   1
   0   0 -11 724.669 82.2866   2
   0   0  12 1412.20 157.556   1
   0   0 -12 962.244 89.1855   2
   0   0  13 997.480 144.721   1
   0   0 -13 464.715 69.2052   2
   0   0  14 1977.57 195.471   1
   0   0 -14 1425.37 113.574   2
   0   0 -15 287.958 60.1247   2
   0   0  15 732.480 132.618   1
   0   0  16 12328.3 511.162   1
   0   0 -16 11742.8 339.203   2
   0   0 -17 138.411 46.3366   2
   0   0  17 132.271 66.4187   1
   0   0  18 555.164 121.232   1
   0   0 -18 570.742 82.5368   2
   0   0 -19 52.7485 36.5649   2
   0   0  19 57.4799 55.2871   1
   0   0  20 5668.33 398.987   1
   0   0 -20 5554.08 264.873   2
   0   0 -21 141.617 49.9321   2
   0   0  21 158.025 79.8404   1
   0   0  21 295.810 40.6284   3
   0   0  22 15572.1 693.488   1
   0   0 -22 14418.6 445.861   2
   0   0  22 13547.1 235.804   3
   0   0  23 524.862 95.6676   2
   0   0 -23 242.393 68.9911   2
   0   0  23 284.229 114.253   1
   0   0  23 371.242 43.2016   3
   0   0  24 2529.47 294.960   1
   0   0  24 2147.42 179.451   2
   0   0  24 2163.69 98.0251   3
   0   0 -24 2233.88 183.836   2
   0   0 -25 192.087 61.6686   2
   0   0  25 269.584 109.466   1
   0   0  25 343.709 84.8220   2
   0   0  25 311.252 39.4996   3
   0   0  25 361.885 50.3906   3
   0   0  26 874.375 126.722   2
   0   0  26 722.732 58.3211   3
   0   0  26 793.248 69.4899   3
   0   0  27 932.098 141.073   2
   0   0  27 521.207 50.6245   3
   0   0  27 598.905 60.8205   3
   0   0  28 7807.04 380.163   2
   0   0  28 7366.77 180.943   3
   0   0  28 7322.26 195.796   3
   0   0  29 1204.44 161.047   2
   0   0  29 735.979 55.6941   3
   0   0  29 796.441 62.4405   3
   0   0  30 2624.23 235.068   2
   0   0  30 1749.29 75.6222   3
   0   0  30 1756.28 81.2231   3
   0   0  31 1028.12 154.021   2
   0   0  32 925.432 147.390   2
   0   0  33 697.112 138.836   2
   0   0  34 1037.12 165.199   2
   0   0  35 755.409 146.408   2
   0   0  36 783.544 157.772   2
   0   0  37 583.500 134.795   2
   0   0  38 2425.01 276.867   2
   0   0  39 350.580 119.576   2
   0   0  40 3614.74 350.752   2
   0   0  41 162.927 90.4767   2
   0   0  42 106.811 66.9541   2
   0   0  43 187.093 115.511   2
   0   0 -44 68.8863 69.0782   4
   0   1   5 30534.3 320.235   2
   0  -1  -5 30886.5 327.180   2
   0  -1  -5 28225.3 406.203   5
   0  -1   5 29694.1 301.624   2
   0   1  -5 31084.8 305.903   2
   0  -1  -6 136867. 752.170   2
   0  -1   6 131479. 695.298   2
   0   1  -6 136266. 715.471   2
   0   1   7 1414.87 124.458   1
   0   1  -7 1857.47 104.240   2
   0   1   8 718.913 97.0875   1
   0  -1   8 1028.83 79.1462   2
   0  -1  -8 1070.32 79.8710   2
   0   1  -8 751.705 62.1333   2
   0   1   9 1100.63 120.451   1
   0  -1   9 1159.86 83.5543   2
   0   1  -9 1064.81 77.1415   2
   0  -1  -9 1387.27 93.3943   2
   0   1  10 171.278 65.5855   1
   0   1 -10 193.249 42.2095   2
   0  -1 -10 338.868 60.6805   2
   0   1  11 25522.8 642.569   1
   0  -1  11 26832.0 423.932   2
   0   1 -11 26796.3 424.076   2
   0  -1 -11 26349.2 437.245   2
   0   1  12 6011.04 316.823   1
   0  -1  12 7115.46 232.093   2
   0  -1 -12 6090.82 219.529   2
   0   1 -12 6743.19 219.096   2
   0  -1  13 1949.09 132.405   2
   0   1  13 1309.76 158.857   1
   0  -1 -13 1412.79 111.882   2
   0   1 -13 1421.31 107.490   2
   0  -1  14 13992.5 339.928   2
   0   1  14 14079.7 522.662   1
   0   1 -14 13907.0 342.452   2
   0  -1 -14 13772.7 354.636   2
   0   1 -15 270.215 62.2787   2
   0   1  15 216.666 88.8187   1
   0  -1 -15 173.731 53.2575   2
   0   1  16 17477.7 631.378   1
   0  -1 -16 17517.9 425.555   2
   0   1 -16 16993.6 400.391   2
   0   1 -17 350.349 64.8290   2
   0   1  17 565.843 120.850   1
   0  -1 -17 530.076 82.5564   2
   0   1  18 6455.45 409.263   1
   0  -1 -18 6451.94 272.998   2
   0   1 -18 6430.24 262.508   2
   0   1  19 5165.47 378.673   1
   0   1 -19 5181.64 242.257   2
   0  -1 -19 5121.26 251.275   2
   0   1  20 1872.19 238.477   1
   0  -1 -20 1752.53 151.576   2
   0   1 -20 1881.20 150.904   2
   0   1  21-32.5048 35.2256   1
   0   1 -21 31.6735 37.9986   2
   0  -1 -21-24.0073 18.9824   2
   0   1  22 1091.35 185.177   1
   0  -1  22 990.618 125.504   2
   0   1 -22 938.285 112.401   2
   0  -1 -22 1028.92 124.118   2
   0  -1  23 7025.05 316.514   2
   0   1  23 7139.53 489.038   1
   0  -1  23 7411.15 497.803   1
   0   1 -23 6337.28 298.760   2
   0  -1 -23 6660.09 318.409   2
   0   1  24 10283.5 606.781   1
   0  -1  24 9386.38 373.990   2
   0   1  24 9580.59 375.167   2
   0  -1  24 9922.65 591.029   1
   0   1 -24 9496.15 376.239   2
   0  -1 -24 10216.4 403.759   2
   0   1  25 2221.26 292.035   1
   0  -1  25 1658.57 167.390   2
   0   1  25 2028.18 180.464   2
   0  -1  25 2031.08 278.858   1
   0  -1 -25 2118.22 191.355   2
   0   1 -25 1966.32 176.970   2
   0  -1  26 774.976 114.969   2
   0   1  26 681.108 107.835   2
   0   1 -26 968.031 128.272   2
   0  -1  26 776.046 75.8832   3
   0   1  27 219.237 65.2000   2
   0  -1  27 246.670 64.0505   2
   0  -1  27 339.065 51.7009   3
   0   1  28 772.262 120.335   2
   0  -1  28 607.182 118.893   2
   0  -1  28 714.554 75.1850   3
   0   1  29 2081.03 198.843   2
   0  -1  29 2070.53 202.373   2
   0  -1  29 2005.02 128.658   3
   0  -1  30 869.355 133.336   2
   0   1  30 1013.68 142.478   2
   0  -1  30 937.136 89.8032   3
   0   1  31 401.441 103.690   2
   0  -1  31 249.250 88.7940   2
   0  -1  31 208.429 39.8889   3
   0  -1  32 2963.63 260.672   2
   0   1  32 3107.42 268.966   2
   0  -1  32 2971.16 162.390   3
   0  -1  33 258.706 97.7642   2
   0   1  33 119.157 75.3537   2
   0  -1  33 97.5295 27.5279   3
   0  -1  33 91.9814 37.3668   3
   0  -1  34 3115.51 284.354   2
   0   1  34 2726.11 260.196   2
   0  -1  34 2676.18 152.771   3
   0  -1  34 2507.09 158.102   3
   0   1  35 1870.64 223.388   2
   0  -1  35 1931.09 225.726   2
   0  -1  35 1468.21 116.971   3
   0  -1  36 306.441 94.7428   2
   0   1  36 445.297 110.743   2
   0  -1  37 441.240 116.641   2
   0   1  37 343.401 110.738   2
   0   1  38 0.93477 50.4546   2
   0  -1  38 45.5604 61.1573   2
   0   1  39 624.560 149.164   2
   0  -1  39 939.656 186.277   2
   0  -1  40 11.8786 48.7602   2
   0   1  40 137.952 70.1854   2
   0  -1  41 500.153 144.026   2
   0   1  41 803.966 168.141   2
   0   1  42-92.2857 73.2405   2
   0  -1  42 58.6236 46.0919   2
   0   1 -42-36.6026 43.0547   4
   0  -1  43-84.7443 88.5766   2
   0   1 -43 116.032 74.6538   4
   0   1 -44 128.366 94.0597   4
   0   1 -45 94.8111 62.3419   4
   0  -2   0 34127.4 491.634   5
   0  -2  -1 0.07035 18.0601   5
   0  -2   1 10.0145 21.2547   5
   0   2   2 11014.0 136.098   2
   0  -2  -2 10878.6 156.306   2
   0  -2  -2 10412.4 273.331   5
   0  -2   2 11398.6 291.549   5
   0   2   3 1191.48 51.3926   2
   0  -2  -3 1072.50 52.0995   2
   0  -2   3 1102.55 95.5948   5
   0  -2  -3 1005.25 88.7514   5
   0   2  -3 1215.88 42.6055   2
   0  -2  -4 830.684 50.4169   2
   0   2   4 795.082 48.5373   2
   0  -2  -4 797.592 79.9703   5
   0   2   4 881.243 86.9140   5
   0   2  -4 742.401 40.9083   2
   0  -2   4 546.305 42.7450   2
   0   2   5 128114. 667.839   2
   0  -2   5 122296. 613.446   2
   0   2  -5 127550. 586.991   2
   0   2   6 24096.9 319.404   2
   0  -2  -6 23143.8 312.730   2
   0  -2  -6 22423.8 440.768   5
   0   2   6 23519.1 458.475   5
   0   2  -6 23458.9 281.584   2
   0  -2   6 22918.9 287.075   2
   0  -2  -7 25971.8 356.217   2
   0   2   7 27259.8 362.540   2
   0  -2   7 27692.1 341.161   2
   0   2  -7 28118.3 339.066   2
   0  -2  -7 25773.4 491.286   5
   0   2   7 26326.5 505.423   5
   0  -2  -8 553.494 61.4945   2
   0   2  -8 751.485 63.9421   2
   0  -2  -8 518.378 38.7513   3
   0  -2   8 709.087 60.6367   2
   0   2   8 553.291 71.5926   2
   0  -2  -8 479.239 70.4277   5
   0   2   8 514.904 76.4999   5
   0   2  -9 1261.36 84.3540   2
   0  -2  -9 1138.16 57.0198   3
   0  -2  -9 1270.57 92.7943   2
   0  -2  -9 1153.47 113.748   5
   0  -2   9 1392.00 91.8354   2
   0   2   9 1262.66 88.7634   2
   0  -2 -10 12514.0 189.645   3
   0  -2 -10 12867.3 301.308   2
   0   2 -10 12611.5 268.862   2
   0  -2 -10 13093.5 385.595   5
   0  -2  10 13382.9 287.001   2
   0   2  10 12564.9 282.319   2
   0  -2 -11 5118.28 118.875   3
   0  -2 -11 5590.01 208.628   2
   0   2 -11 5430.57 185.435   2
   0   2  11 5612.76 199.804   2
   0  -2  11 5622.50 198.527   2
   0  -2 -11 5370.50 255.660   5
   0  -2  12 250.059 63.6489   2
   0   2  12 279.447 67.2635   2
   0  -2 -12 109.070 44.0021   2
   0   2 -12 61.8403 33.2115   2
   0  -2 -12 38.2512 32.2946   5
   0  -2 -13 8151.89 271.600   2
   0   2 -13 7861.24 241.213   2
   0   2  13 7817.31 248.239   2
   0  -2  13 8426.67 260.918   2
   0  -2 -13 7868.33 337.367   5
   0   2  14 795.193 87.4001   2
   0  -2  14 1084.04 104.834   2
   0  -2 -14 803.845 90.9742   2
   0   2 -14 849.739 84.5548   2
   0  -2 -14 666.303 102.475   5
   0  -2 -15 2585.01 165.210   2
   0   2 -15 2664.93 151.749   2
   0  -2  15 2615.19 157.275   2
   0  -2 -15 2574.79 202.996   5
   0  -2 -16 201.128 59.2578   2
   0   2 -16 214.303 54.5142   2
   0  -2 -16 205.344 63.4267   5
   0  -2 -17 17685.7 456.083   2
   0   2 -17 16390.7 399.552   2
   0  -2 -17 17541.9 569.230   5
   0  -2  17 17849.1 431.193   2
   0  -2 -18 8528.68 325.786   2
   0   2 -18 8409.14 293.170   2
   0  -2 -18 8476.77 407.866   5
   0  -2  18 8780.51 312.147   2
   0   2 -19 1440.56 126.195   2
   0  -2 -19 1209.61 127.985   2
   0  -2 -19 1238.12 161.002   5
   0  -2  19 1545.95 138.208   2
   0  -2  20 890.293 116.508   2
   0  -2 -20 846.396 108.855   2
   0   2 -20 786.042 96.3781   2
   0  -2  21 7417.67 311.871   2
   0   2 -21 7895.92 309.502   2
   0  -2 -21 8105.29 342.786   2
   0   2 -22 429.842 80.9639   2
   0  -2 -22 345.681 81.5028   2
   0   2  22 773.624 114.107   2
   0  -2  22 963.811 131.449   2
   0  -2  23 12109.9 417.390   2
   0   2  23 10951.0 390.605   2
   0   2 -23 11614.2 398.421   2
   0  -2 -23 11669.4 431.406   2
   0   2  24 1821.44 168.456   2
   0  -2  24 1738.25 173.517   2
   0  -2 -24 2052.75 187.960   2
   0   2 -24 1652.18 155.291   2
   0  -2  25 1133.76 135.981   2
   0   2  25 1304.33 143.833   2
   0  -2 -25 1413.87 158.886   2
   0   2 -25 1227.65 140.287   2
   0   2  26 27.6503 30.1467   2
   0  -2  26 38.1893 50.3285   2
   0   2 -26 54.0555 32.1197   2
   0  -2  27 881.432 125.504   2
   0   2  27 962.285 128.652   2
   0  -2  28-48.4632 41.5018   2
   0   2  28-6.50558 37.9169   2
   0  -2  28 15.3433 26.1960   3
   0  -2  29 476.901 97.1179   2
   0   2  29 400.380 85.2958   2
   0  -2  29 571.369 79.7845   3
   0  -2  30 647.188 115.978   2
   0   2  30 529.976 106.032   2
   0  -2  30 607.752 84.8955   3
   0  -2 -30 605.352 143.012   5
   0  -2  31 1176.12 171.070   2
   0   2  31 1274.16 170.585   2
   0  -2  31 1193.70 118.653   3
   0  -2  32 4253.64 314.579   2
   0   2  32 4214.74 308.291   2
   0  -2  32 4068.22 219.467   3
   0   2  33 119.145 61.7794   2
   0  -2  33 70.1957 48.4529   2
   0  -2  33 78.7979 39.4987   3
   0  -2  34 1226.35 181.342   2
   0   2  34 1279.33 180.451   2
   0  -2  34 1267.83 126.899   3
   0   2  35 529.753 122.983   2
   0  -2  35 501.399 129.069   2
   0   2  36-5.38218 34.8265   2
   0  -2  36 44.8485 49.8828   2
   0  -2  37 685.732 149.178   2
   0   2  37 611.110 132.135   2
   0   2  38 570.408 143.097   2
   0  -2  38 657.495 151.338   2
   0  -2  39 1766.43 244.607   2
   0   2  39 1239.08 205.480   2
   0  -2  40 442.305 137.785   2
   0   2  40 170.082 66.6995   2
   0   2 -40 385.131 120.122   4
   0   2  41 138.965 81.2510   2
   0   2 -41 223.415 90.4666   4
   0   2  42 25.8393 64.9383   2
   0   2 -42-44.7573 57.0323   4
   0   2 -43 210.462 104.253   4
   0   2 -44-26.6718 62.5584   4
   0   2 -45 145.203 103.325   4
   0   2 -46 6.10052 78.2844   4
   0  -3   0-11.3459 23.9434   5
   0  -3  -1 965.743 102.184   5
   0  -3   1 1002.47 104.651   5
   0   3   2 6869.53 114.362   2
   0  -3   2 6267.94 262.640   5
   0  -3  -2 6169.78 258.544   5
   0  -3   3 1171.42 127.892   5
   0   3   3 1752.53 157.888   5
   0  -3  -3 1196.61 125.818   5
   0  -3  -4 1457.60 77.2866   2
   0   3   4 1694.23 74.5893   2
   0  -3   4 1478.84 133.596   5
   0   3   4 1513.71 133.669   5
   0  -3  -4 1430.68 123.758   5
   0   3  -4 1686.51 56.9303   2
   0   3   5 796.572 68.4954   2
   0  -3  -5 523.469 51.0000   2
   0  -3  -5 595.185 81.6917   5
   0   3   5 695.130 93.3690   5
   0   3  -5 709.103 45.4127   2
   0  -3  -6 17799.8 295.833   2
   0   3   6 20416.9 300.821   2
   0   3  -6 19400.7 246.816   2
   0  -3  -6 18205.3 463.678   5
   0   3   6 18936.1 478.856   5
   0   3  -7 753.453 55.5766   2
   0  -3  -7 411.603 48.6649   2
   0   3   7 594.071 60.6103   2
   0  -3  -7 384.497 67.4023   5
   0   3  -7 715.828 104.151   5
   0   3   7 354.220 71.0617   5
   0   3  -7 640.518 39.3900   4
   0   3  -8 565.577 59.1069   2
   0   3   8 754.451 87.0051   2
   0  -3   8 306.053 48.9420   2
   0  -3  -8 306.798 48.1570   2
   0   3  -8 356.751 75.9433   5
   0  -3  -8 370.734 72.4810   5
   0   3   8 434.225 81.2037   5
   0  -3  -9 26197.9 424.288   2
   0   3  -9 28370.3 374.868   2
   0   3   9 29506.2 417.767   2
   0  -3   9 26417.4 409.360   2
   0   3   9 28353.2 620.980   5
   0  -3  -9 27030.9 594.157   5
   0   3  -9 28930.0 652.640   5
   0  -3 -10 21.8182 16.8029   3
   0  -3  10 116.028 62.6033   2
   0   3  10 121.768 74.6912   2
   0  -3 -10 234.419 59.0938   2
   0  -3 -10 11.2667 20.8101   5
   0   3  10 83.3151 52.3367   5
   0  -3 -11 18774.6 390.029   2
   0  -3 -11 18645.8 293.307   3
   0   3 -11 19622.3 340.347   2
   0   3  11 20270.0 561.736   5
   0  -3 -11 19032.8 525.465   5
   0   3  11 19164.3 371.058   2
   0  -3  11 20589.5 378.307   2
   0  -3 -12 7664.49 258.414   2
   0   3 -12 6473.27 203.559   2
   0  -3 -12 7345.50 185.451   3
   0  -3 -12 7360.49 336.273   5
   0  -3  12 7062.77 240.371   2
   0   3  12 7740.56 248.278   2
   0  -3 -13 1507.89 84.8531   3
   0  -3 -13 1627.16 127.760   2
   0   3 -13 1466.22 103.749   2
   0  -3 -13 1474.70 163.790   5
   0   3  13 1674.51 125.011   2
   0  -3  13 1834.95 124.917   2
   0  -3 -14 1537.00 83.9196   3
   0   3 -14 1682.19 114.926   2
   0  -3 -14 1668.32 135.995   2
   0  -3 -14 1726.43 170.705   5
   0  -3  14 2177.17 151.028   2
   0   3  14 1764.26 131.016   2
   0  -3 -15 5891.56 159.022   3
   0   3 -15 5699.38 216.557   2
   0  -3 -15 6134.30 261.963   2
   0  -3  15 6164.88 250.272   2
   0   3  15 6012.68 237.570   2
   0  -3 -15 6095.13 329.897   5
   0   3 -16 245.720 59.4894   2
   0  -3  16 410.580 91.4823   2
   0  -3 -16 325.801 75.6001   2
   0  -3 -16 142.291 23.8651   3
   0  -3 -16 167.483 62.5068   5
   0   3 -17 8444.69 284.695   2
   0  -3 -17 9786.84 350.710   2
   0  -3 -17 9362.69 424.185   5
   0  -3  17 9942.21 338.337   2
   0  -3 -18 3941.43 230.584   2
   0  -3  18 4928.70 250.549   2
   0  -3 -18 4614.42 308.864   5
   0   3 -19 250.882 70.1945   2
   0  -3 -19 289.147 80.5204   2
   0  -3 -19 152.960 65.6256   5
   0  -3  20 212.057 55.6015   2
   0   3  20 253.947 63.9302   2
   0   3 -20 236.416 51.3663   2
   0  -3 -20 163.539 56.7389   2
   0  -3 -20 155.403 71.7704   5
   0   3  21 146.191 56.4480   2
   0  -3 -21 132.696 54.5635   2
   0  -3  21 234.673 68.5480   2
   0   3 -21 101.715 39.3303   2
   0  -3 -21 113.847 62.4407   5
   0  -3 -22 5114.03 286.685   2
   0   3 -22 5141.71 254.646   2
   0  -3 -22 5338.72 426.077   1
   0  -3  22 4964.24 269.564   2
   0   3  22 4673.58 251.973   2
   0  -3 -22 5004.23 353.392   5
   0  -3  23 1202.88 141.206   2
   0   3  23 1132.44 128.802   2
   0  -3 -23 872.670 178.604   1
   0   3 -23 1132.11 124.720   2
   0  -3 -23 1051.44 136.491   2
   0  -3 -23 1130.45 173.229   5
   0   3  24 968.858 124.346   2
   0  -3 -24 874.880 180.011   1
   0  -3  24 1060.54 130.607   2
   0   3 -24 1097.00 127.162   2
   0  -3 -24 1046.45 135.071   2
   0  -3 -24 1021.15 166.641   5
   0   3  25 931.187 123.153   2
   0  -3 -25 813.197 176.427   1
   0  -3  25 785.358 117.732   2
   0   3 -25 1075.17 126.468   2
   0  -3 -25 1023.09 171.488   5
   0   3  26 209.709 67.3600   2
   0   3 -26 37.0575 31.3422   2
   0  -3  26 47.7167 41.1735   2
   0  -3 -26 82.4974 53.9110   5
   0   3  27 164.430 65.0379   2
   0  -3  27 169.393 64.4533   2
   0  -3 -27 46.1279 32.4400   5
   0   3  28 2449.76 213.588   2
   0  -3  28 2607.11 228.524   2
   0  -3 -28 2734.98 287.521   5
   0  -3  29 266.453 75.3451   2
   0   3  29 260.140 85.7197   2
   0  -3 -29 120.287 86.8367   5
   0   3  30 3238.08 260.760   2
   0  -3  30 3189.41 270.016   2
   0  -3  30 3100.16 204.910   3
   0   3  31 2050.22 214.097   2
   0  -3  31 2183.21 226.141   2
   0  -3  31 2011.54 167.690   3
   0   3  32 1290.18 174.665   2
   0  -3  32 1443.74 188.617   2
   0  -3  32 1161.31 129.355   3
   0  -3  33 483.352 122.194   2
   0   3  33 392.652 109.451   2
   0  -3  33 258.398 64.9101   3
   0  -3  34 2253.39 248.459   2
   0   3  34 2773.22 267.017   2
   0  -3  35 1298.90 194.672   2
   0   3  35 1478.66 202.498   2
   0   3  36 1480.93 205.257   2
   0  -3  36 1212.49 193.686   2
   0   3  37 437.381 126.893   2
   0  -3  37 392.168 120.313   2
   0   3 -37 287.379 93.1618   4
   0   3  38 2378.96 279.747   2
   0   3 -38 1849.05 233.458   4
   0   3  39 107.117 71.6923   2
   0   3 -39 236.629 91.7272   4
   0   3  40 1153.41 206.149   2
   0   3 -40 959.801 174.214   4
   0   3  41-58.4950 82.2008   2
   0   3 -41 60.5858 66.7106   4
   0   3  42 241.845 97.2024   2
   0   3 -42 75.3562 71.9333   4
   0   3 -43 30.3717 39.9465   4
   0   3 -44 568.176 168.477   4
   0   3 -45 120.862 80.3282   4
   0   3 -46 126.363 101.642   4
   0  -4   0 7708.95 332.375   5
   0   4   1 353.700 26.7842   2
   0  -4  -1 307.680 69.3790   5
   0  -4   1 358.372 76.4387   5
   0  -4   2-6.89570 40.0840   5
   0  -4  -2-25.9266 35.9096   5
   0   4   2 15.6503 13.7903   2
   0   4   3 2657.18 86.3010   2
   0  -4  -3 2103.37 174.083   5
   0  -4   3 2218.50 183.501   5
   0   4  -4 787.207 38.3930   2
   0   4   4 698.537 53.2662   2
   0  -4   4 913.218 125.141   5
   0   4   4 1181.73 143.550   5
   0  -4  -4 823.072 119.553   5
   0   4  -5 5487.09 111.651   2
   0  -4   5 5260.36 289.152   5
   0  -4  -5 5033.51 271.167   5
   0   4   5 5008.99 278.777   5
   0   4   5 5848.52 152.718   2
   0   4  -6 538.557 44.7749   2
   0   4   6 240.207 62.4951   5
   0  -4  -6 191.761 62.3002   5
   0   4   6 477.942 58.2291   2
   0  -4  -6 248.769 41.3510   2
   0  -4  -7 6573.64 205.853   2
   0   4  -7 7509.68 160.917   2
   0   4   7 7028.19 336.684   5
   0  -4  -7 6825.07 323.880   5
   0   4   7 7218.25 195.642   2
   0   4  -8 2385.48 98.1397   2
   0  -4  -8 2015.16 120.704   2
   0   4   8 2451.28 119.103   2
   0  -4  -8 2279.75 188.693   5
   0   4   8 2266.29 194.911   5
   0  -4  -9 903.693 86.4321   2
   0   4  -9 1214.01 79.4240   2
   0   4   9 1110.62 95.9195   2
   0   4   9 855.892 124.270   5
   0  -4  -9 745.289 113.640   5
   0   4  -9 1031.50 57.3001   4
   0   4 -10 16836.8 295.583   2
   0  -4 -10 16961.5 368.338   2
   0   4  10 17312.1 345.788   2
   0  -4 -10 17975.6 545.498   5
   0   4  10 17690.0 559.501   5
   0   4 -10 17744.3 261.544   4
   0  -4 -11 59.6141 30.0316   3
   0  -4 -11 125.448 44.0624   2
   0   4 -11 150.834 39.9784   2
   0  -4 -11 21.3488 24.0156   5
   0   4  11 47.9735 40.5470   5
   0   4 -11 17.7725 10.2341   4
   0  -4 -12 6246.47 202.639   3
   0   4 -12 5998.04 193.940   2
   0  -4 -12 6353.68 242.158   2
   0   4  12 6631.24 231.896   2
   0  -4 -12 6324.49 336.253   5
   0   4  12 6402.10 347.654   5
   0   4 -12 6238.62 178.652   4
   0  -4 -13 4471.40 173.161   3
   0   4 -13 4926.53 183.800   2
   0  -4 -13 4041.16 213.193   2
   0   4  13 5181.64 214.023   2
   0  -4  13 5578.62 224.990   2
   0  -4 -13 4624.67 297.102   5
   0   4 -13 5030.81 171.244   4
   0  -4 -14 12115.9 287.076   3
   0   4 -14 12125.8 298.822   2
   0  -4 -14 12028.2 360.898   2
   0  -4 -14 12371.1 485.720   5
   0   4 -14 13570.6 536.008   5
   0  -4  14 13421.5 356.548   2
   0   4  14 12565.9 334.522   2
   0   4 -15 926.484 90.2251   2
   0  -4 -15 665.099 68.6291   3
   0  -4 -15 827.693 98.9591   2
   0  -4 -15 750.092 123.084   5
   0  -4  15 1029.82 118.316   2
   0  -4 -16 8772.10 243.810   3
   0  -4 -16 8820.90 334.018   2
   0   4 -16 8708.77 272.828   2
   0  -4 -16 9238.56 437.377   5
   0  -4  16 9557.20 320.952   2
   0  -4 -17 179.556 36.8409   3
   0  -4 -17 201.560 73.9485   5
   0   4 -17 279.791 52.9698   2
   0  -4 -17 140.020 58.9333   2
   0  -4  17 238.699 67.3839   2
   0  -4 -18 29.7159 16.0599   3
   0  -4 -18 43.2496 33.9404   5
   0  -4 -18-19.5244 24.5607   2
   0  -4  18-7.89056 27.8284   2
   0   4 -18 4.92767 16.5490   2
   0  -4 -19 189.938 32.8359   3
   0  -4  19 325.802 75.7690   2
   0   4 -19 265.843 55.0245   2
   0   4  19 375.821 73.3831   2
   0  -4 -19 265.185 69.6164   2
   0  -4 -19 234.103 83.6204   5
   0   4 -20 722.710 91.1668   2
   0   4  20 643.532 93.8747   2
   0  -4 -20 830.683 168.684   1
   0  -4  20 888.530 111.588   2
   0  -4 -20 634.871 100.607   2
   0  -4 -20 807.906 145.306   5
   0  -4 -20 788.234 59.2375   3
   0  -4 -21 78.8258 40.8500   5
   0   4  21 207.722 63.8461   2
   0  -4 -21 60.5184 123.871   1
   0  -4  21 127.644 51.8044   2
   0  -4 -21 159.607 61.4586   2
   0   4 -21 66.1571 35.6476   2
   0  -4 -22 1799.46 177.670   2
   0   4 -22 1752.09 148.481   2
   0  -4 -22 1877.68 222.941   5
   0  -4 -22 1977.90 277.782   1
   0  -4  22 1884.97 172.471   2
   0   4  22 2091.69 171.562   2
   0  -4 -23 146.965 96.5283   5
   0  -4 -23 388.157 277.785   1
   0   4 -23 216.016 67.2744   2
   0   4  23 700.320 118.270   2
   0  -4 -23 314.026 85.1695   2
   0  -4 -24 9156.75 425.193   2
   0   4 -24 8927.17 354.990   2
   0  -4 -24 10381.0 536.423   5
   0  -4 -24 9842.63 643.463   1
   0   4  24 8928.31 375.986   2
   0  -4  24 9451.69 412.592   2
   0  -4 -25 506.522 157.957   5
   0   4 -25 424.666 88.9067   2
   0  -4  25 584.351 123.285   2
   0   4  25 653.820 116.093   2
   0  -4 -25 446.398 165.307   1
   0   4 -26 2481.80 196.520   2
   0  -4  26 2579.99 220.812   2
   0  -4 -26 2592.83 333.894   1
   0   4  26 2583.31 212.798   2
   0  -4 -26 2894.35 295.881   5
   0   4  27 43.9417 40.9439   2
   0  -4  27 31.3604 37.3329   2
   0  -4 -27 170.574 117.178   1
   0  -4 -27 101.337 70.8939   5
   0  -4 -28 108.065 82.5192   1
   0   4  28-23.5753 38.9092   2
   0  -4  28 79.9769 51.6402   2
   0  -4 -29 1097.50 229.232   1
   0  -4  29 1542.26 185.071   2
   0   4  29 1469.41 174.838   2
   0  -4  30 2223.59 229.247   2
   0   4  30 2205.94 215.636   2
   0  -4  31-5.36826 50.2262   2
   0   4  31-27.9205 48.7807   2
   0  -4  31 0.99185 34.7678   3
   0   4 -31 50.1388 38.5932   4
   0   4  32 106.982 46.5113   2
   0  -4  32 148.496 63.3944   2
   0  -4  32 144.710 55.3864   3
   0   4 -32 129.792 57.3876   4
   0   4  33-19.9409 52.6573   2
   0  -4  33 58.3579 42.8632   3
   0   4 -33 60.5421 51.4512   4
   0   4  34 909.101 154.926   2
   0   4 -34 846.933 143.791   4
   0   4  35 7.00878 38.8548   2
   0   4 -35 51.5546 38.6314   4
   0   4  36-39.4684 37.6524   2
   0   4 -36-3.93154 29.2701   4
   0   4  37-43.3961 63.2611   2
   0   4 -37 7.76132 31.1976   4
   0   4  38 517.980 136.247   2
   0   4 -38 301.306 95.8330   4
   0   4  39 80.4203 54.1333   2
   0   4 -39 5.53888 49.2509   4
   0   4  40 233.818 99.8718   2
   0   4 -40 160.200 79.9763   4
   0   4  41 3.79951 57.9274   2
   0   4 -41 271.732 111.121   4
   0   4 -42 18.2565 52.6889   4
   0   4 -43 80.6528 75.5713   4
   0   4 -44 110.587 85.2732   4
   0   4 -45 102.738 96.0263   4
   0  -5   0 33.9647 41.3064   5
   0  -5  -1 8104.40 387.969   5
   0  -5   1 8261.10 392.874   5
   0  -5   1 8046.83 156.063   4
   0  -5   2 418.112 91.2527   5
   0  -5  -2 456.826 94.8242   5
   0   5   2 519.506 36.8036   2
   0  -5  -3 707.464 114.469   5
   0  -5   3 678.951 119.046   5
   0   5   3 867.452 49.0081   2
   0  -5  -4 3596.49 257.074   5
   0  -5   4 3445.88 259.035   5
   0   5   4 3801.58 114.178   2
   0   5  -5 2171.18 61.7485   2
   0  -5  -5 2166.48 202.015   5
   0  -5   5 1877.42 194.500   5
   0   5   5 2416.54 100.358   2
   0  -5  -6 76.9832 47.6424   5
   0  -5   6 5.61571 35.5018   5
   0   5  -6 105.910 23.1889   2
   0   5  -7 10679.5 183.015   2
   0  -5  -7 10298.0 443.171   5
   0   5   7 10467.8 232.830   2
   0   5  -8 1026.26 64.4920   2
   0  -5  -8 622.623 74.6003   2
   0  -5  -8 701.775 116.665   5
   0   5   8 1054.68 85.8223   2
   0  -5  -9 826.943 88.4982   2
   0   5  -9 1155.78 72.2301   2
   0  -5  -9 935.452 137.904   5
   0   5   9 1109.46 86.1245   2
   0   5 -10 2118.57 102.838   2
   0  -5 -10 1808.70 131.963   2
   0   5  10 2230.86 123.888   2
   0  -5 -10 1730.35 190.035   5
   0   5  11 64.0476 33.4765   2
   0   5 -11 3.76311 12.1899   2
   0  -5 -11 23.4082 27.4672   2
   0  -5 -11 3.47976 32.5548   5
   0  -5 -12 122.931 37.7212   3
   0  -5 -12 86.6109 44.4384   2
   0   5 -12 80.7576 30.6711   2
   0   5  12 146.744 45.9040   2
   0  -5 -12 87.3397 52.6375   5
   0   5 -12 69.7721 19.3613   4
   0  -5 -13 1941.48 145.060   2
   0   5 -13 2081.38 118.757   2
   0  -5 -13 2048.54 136.402   3
   0   5  13 1999.48 134.656   2
   0  -5 -13 1849.92 201.262   5
   0   5 -13 1930.93 220.488   5
   0   5 -13 1915.77 100.870   4
   0  -5 -14 205.810 47.2015   3
   0  -5 -14 218.576 58.6728   2
   0   5 -14 161.018 38.9057   2
   0   5  14 312.429 63.3120   2
   0  -5 -14 140.813 59.2602   5
   0   5 -14 200.935 90.8581   5
   0   5 -14 146.830 31.4908   4
   0   5 -15 2189.33 132.397   2
   0  -5 -15 2636.34 154.776   3
   0  -5 -15 2591.40 179.358   2
   0  -5 -15 2732.81 252.218   5
   0   5  15 2680.84 257.693   5
   0   5 -15 2614.30 261.525   5
   0   5 -15 2568.84 132.431   4
   0  -5 -16 26.3334 23.3938   3
   0  -5 -16 30.6322 34.1603   2
   0   5 -16 77.7717 40.0714   2
   0   5 -16 83.9274 58.8822   5
   0  -5 -16 4.72484 37.4523   5
   0   5  16-22.9930 34.3444   5
   0   5 -16 39.1309 25.9046   4
   0   5 -17 5005.77 214.470   2
   0  -5 -17 5520.60 226.083   3
   0  -5 -17 5333.00 272.286   2
   0  -5 -17 5868.80 463.623   1
   0   5 -17 5550.91 396.394   5
   0  -5 -17 5173.22 355.581   5
   0   5 -17 5129.64 206.990   4
   0  -5 -18 413.639 62.5389   3
   0   5  18 439.769 75.0827   2
   0  -5 -18 479.452 199.147   1
   0   5 -18 446.179 67.4049   2
   0  -5 -18 402.978 80.5608   2
   0  -5 -18 447.513 106.593   5
   0   5 -18 332.204 111.612   5
   0   5 -18 405.875 66.2491   4
   0  -5 -19 134.171 38.9046   3
   0   5  19 140.778 53.1380   2
   0  -5 -19 124.238 54.0160   2
   0  -5 -19-7.22066 66.8148   1
   0   5 -19 115.751 37.0186   2
   0  -5 -19 48.3062 36.9024   5
   0   5 -19 47.0133 67.1261   5
   0   5 -19 113.027 38.1851   4
   0  -5 -20 1203.04 99.7321   3
   0  -5 -20 1187.53 149.633   2
   0   5 -20 1226.08 117.570   2
   0   5  20 1197.03 125.297   2
   0  -5 -20 1298.55 225.201   1
   0  -5 -20 1314.14 190.496   5
   0   5 -20 1156.27 185.933   5
   0   5 -20 1338.74 119.326   4
   0  -5 -21 209.857 41.8378   3
   0   5  21 217.820 59.4774   2
   0  -5 -21 269.350 82.3208   2
   0  -5 -21 264.354 112.212   1
   0   5 -21 231.760 57.4180   2
   0   5 -21 446.473 122.868   5
   0  -5 -21 222.860 70.8630   5
   0   5 -21 361.185 68.4829   4
   0   5 -22 1076.45 117.400   2
   0  -5 -22 1188.97 156.362   2
   0  -5 -22 985.170 198.864   1
   0   5  22 1143.61 132.214   2
   0   5 -22 1052.07 188.734   5
   0  -5 -22 1312.79 198.779   5
   0   5 -22 1055.56 113.846   4
   0  -5 -22 1165.31 88.0561   3
   0  -5 -23 120.309 25.0289   3
   0   5  23 85.1812 43.1095   2
   0  -5 -23 1.27831 70.8378   1
   0   5 -23 185.993 53.3799   2
   0  -5 -23 195.171 68.2978   2
   0  -5 -23 88.8546 54.0480   5
   0   5 -23 164.340 47.0997   4
   0   5 -24 783.735 106.618   2
   0  -5 -24 987.164 177.058   5
   0  -5 -24 735.223 181.157   1
   0   5  24 851.040 120.188   2
   0   5 -25 1129.91 130.139   2
   0  -5 -25 1598.21 276.427   1
   0   5  25 1255.22 145.137   2
   0  -5 -25 1411.64 213.109   5
   0   5 -26-15.9090 34.4304   2
   0   5  26 81.4565 50.6273   2
   0  -5 -26 8.84970 70.4495   1
   0  -5 -27 1795.82 301.930   1
   0   5  27 1743.05 184.236   2
   0   5 -27 1457.48 158.243   4
   0  -5 -28 288.807 104.627   1
   0   5  28 328.295 83.5606   2
   0   5 -28 335.390 81.3239   4
   0   5  29 289.428 80.9389   2
   0  -5 -29 126.251 70.7063   1
   0   5 -29 425.705 91.9950   4
   0   5  30 368.902 96.7578   2
   0  -5 -30 559.393 176.018   1
   0   5 -30 383.915 82.7966   4
   0  -5 -31 161.733 96.3289   1
   0   5  31 272.578 88.7826   2
   0   5 -31 188.667 63.6503   4
   0   5  32 33.3591 44.4122   2
   0   5 -32 55.3019 41.5194   4
   0   5  33 870.040 148.869   2
   0   5 -33 1141.80 164.386   4
   0   5  34 77.3729 52.2414   2
   0   5 -34 62.8245 47.9261   4
   0   5  35 780.497 151.310   2
   0   5 -35 872.314 148.919   4
   0   5  36 155.639 74.3442   2
   0   5 -36 155.998 77.1252   4
   0   5  37 503.841 130.529   2
   0   5 -37 435.894 106.088   4
   0   5  38-100.303 69.4694   2
   0   5 -38-74.5393 49.4594   4
   0   5  39 704.590 162.814   2
   0   5 -39 548.525 132.705   4
   0   5  40 267.190 98.4043   2
   0   5 -40 259.235 98.0408   4
   0   5 -41 70.3201 54.3809   4
   0   5 -42 66.8029 78.1701   4
   0  -6   0 4420.54 315.789   5
   0  -6   0 4579.75 145.139   4
   0  -6   1 1765.03 199.976   5
   0  -6  -1 1963.51 208.099   5
   0  -6  -1 1811.89 95.7523   4
   0  -6   1 1697.63 79.9965   4
   0  -6   2 94.7694 55.3837   5
   0  -6  -2 150.274 63.7340   5
   0   6   2 98.1926 13.4898   2
   0  -6   3 352.105 89.6253   5
   0  -6  -3 431.446 102.020   5
   0   6   3 443.887 33.3560   2
   0  -6   4 5074.59 343.988   5
   0  -6  -4 5086.44 334.041   5
   0   6   4 4644.37 121.920   2
   0  -6   5 1965.09 219.774   5
   0   6   5 1890.59 213.057   5
   0  -6  -5 2138.55 215.896   5
   0   6   5 2074.68 91.0920   2
   0   6   6 2169.75 228.799   5
   0  -6  -6 1898.21 206.618   5
   0  -6   6 2277.58 234.438   5
   0   6   6 1924.25 95.7768   2
   0   6  -7 372.403 31.0219   2
   0   6   7 392.376 99.0628   5
   0  -6  -7 417.192 100.183   5
   0   6   7 437.249 50.0294   2
   0   6   8 28.6080 43.8806   5
   0  -6  -8 6.20011 38.9685   5
   0   6   8 39.4871 24.8840   2
   0   6  -8 43.7963 14.6927   2
   0   6  -9 628.499 50.4588   2
   0  -6  -9 506.524 110.740   5
   0   6   9 498.194 108.550   5
   0   6   9 516.030 58.8539   2
   0   6  10 32.7129 37.7963   5
   0  -6 -10-1.88311 29.2513   5
   0   6  10 89.7863 35.7342   2
   0   6 -10 13.1384 18.0184   2
   0   6 -11 3690.81 141.362   2
   0   6 -11 3871.64 321.433   5
   0  -6 -11 3958.36 307.206   5
   0   6  11 3764.64 316.100   5
   0   6  11 3791.92 172.080   2
   0  -6 -12 2286.98 169.075   2
   0  -6 -12 2461.73 167.980   3
   0   6 -12 2176.91 115.070   2
   0   6 -12 1924.68 236.709   5
   0  -6 -12 2436.82 243.911   5
   0   6  12 2665.65 268.237   5
   0   6  12 2453.09 144.943   2
   0  -6 -13 1407.72 139.160   2
   0   6 -13 1450.63 99.6315   2
   0  -6 -13 1585.63 136.016   3
   0   6  13 1506.15 204.635   5
   0   6 -13 1358.79 198.779   5
   0  -6 -13 1674.86 207.462   5
   0   6  13 1727.48 127.964   2
   0  -6 -14 2823.07 182.345   3
   0  -6 -14 2617.87 190.516   2
   0   6 -14 2891.47 146.472   2
   0  -6 -14 3233.43 290.694   5
   0   6 -14 2915.57 288.552   5
   0   6  14 2782.92 274.864   5
   0  -6 -15 1591.84 158.801   2
   0  -6 -15 1807.82 148.395   3
   0   6 -15 2935.12 313.184   5
   0  -6 -15 1725.35 217.571   5
   0   6  15 3198.74 315.099   5
   0  -6 -16 383.369 72.1647   3
   0   6 -16 456.908 63.7344   2
   0  -6 -16 426.608 86.6206   2
   0   6 -16 395.212 128.000   5
   0  -6 -16 389.046 118.252   5
   0   6 -16 383.962 49.1171   4
   0   6  16 407.741 116.653   5
   0  -6 -17 26.5225 23.1176   3
   0   6 -17 16.3181 27.5099   2
   0  -6 -17 18.7401 37.7731   2
   0  -6 -17 54.8271 46.8190   5
   0   6 -17-48.6648 50.1039   5
   0   6 -17-8.98645 19.1898   4
   0   6  17-7.34890 37.5757   5
   0  -6 -18 2129.13 160.106   3
   0  -6 -18 1811.70 182.209   2
   0   6 -18 1863.41 137.115   2
   0   6  18 2127.45 166.801   2
   0   6 -18 2683.49 299.430   5
   0  -6 -18 1996.11 239.718   5
   0   6 -18 2069.46 132.721   4
   0  -6 -19 6891.37 346.399   2
   0  -6 -19 7340.18 292.965   3
   0   6 -19 7157.85 277.094   2
   0  -6 -19 7423.31 562.435   1
   0   6  19 7022.14 303.683   2
   0  -6 -19 7674.96 471.455   5
   0   6 -19 8645.61 523.609   5
   0   6 -19 7727.75 268.484   4
   0  -6 -20 44.9825 25.6893   3
   0   6  20 305.309 77.1568   2
   0  -6 -20 105.989 51.8208   2
   0   6 -20 137.333 48.0031   2
   0  -6 -20 52.7363 70.2312   1
   0   6 -20 196.570 132.771   5
   0  -6 -20 63.3216 67.6468   5
   0   6 -20 58.3856 37.2673   4
   0  -6 -21 2413.46 164.558   3
   0  -6 -21 2322.61 211.963   2
   0   6 -21 2539.58 175.757   2
   0  -6 -21 3393.12 389.571   1
   0   6  21 2541.53 194.820   2
   0   6 -21 3067.49 323.663   5
   0  -6 -21 2765.59 295.507   5
   0   6 -21 2748.16 175.157   4
   0  -6 -22 197.059 47.0215   3
   0   6  22 139.861 57.8401   2
   0  -6 -22 323.262 89.0738   2
   0  -6 -22 152.940 93.8597   1
   0   6 -22 159.219 47.4958   2
   0   6 -22 266.904 121.516   5
   0   6 -22 179.476 48.1883   4
   0  -6 -23 124.008 34.2635   3
   0   6  23 124.613 47.0363   2
   0  -6 -23 32.9069 61.9118   1
   0  -6 -23-45.1827 41.4964   2
   0   6 -23 155.901 49.9268   2
   0   6 -23 138.534 72.8099   5
   0   6 -23 119.390 43.9406   4
   0   6  24 889.617 124.550   2
   0   6 -24 748.551 106.553   2
   0  -6 -24 609.930 172.951   1
   0   6 -24 724.706 169.647   5
   0   6 -24 746.547 103.275   4
   0  -6 -24 710.932 77.2863   3
   0  -6 -25 371.853 50.1107   3
   0  -6 -25 171.823 118.552   1
   0   6 -25 496.590 89.1848   2
   0   6  25 381.182 91.4247   2
   0   6 -25 466.427 139.523   5
   0  -6 -26 302.461 120.137   1
   0   6  26 512.038 100.550   2
   0   6 -26 567.957 98.0178   2
   0   6 -26 695.439 172.709   5
   0  -6 -27 402.196 149.659   1
   0   6  27 409.304 89.6702   2
   0   6 -27 616.515 156.332   5
   0  -6 -28 1.07196 72.2385   1
   0   6  28 76.6132 58.8421   2
   0   6 -28-16.8904 63.5556   5
   0   6  29 3255.67 267.757   2
   0  -6 -29 3663.79 449.886   1
   0   6 -29 3787.04 395.832   5
   0   6 -29 3562.76 256.073   4
   0  -6 -30 160.589 125.851   1
   0   6  30 235.220 82.4036   2
   0   6 -30 313.564 122.777   5
   0   6 -30 197.327 66.9212   4
   0   6  31 21.7776 40.2302   2
   0  -6 -31 41.7815 96.4171   1
   0   6 -31 12.1398 49.6555   5
   0   6 -31 42.7634 42.9968   4
   0  -6 -32 19.1162 70.1587   1
   0   6  32 24.2511 36.9103   2
   0   6 -32 27.5782 72.6396   5
   0   6 -32 23.5406 36.4841   4
   0   6  33 240.017 86.6503   2
   0  -6 -33 153.278 112.479   1
   0   6 -33 159.327 117.745   5
   0   6 -33 73.9658 60.9286   4
   0   6  34 391.471 111.646   2
   0  -6 -34 536.263 216.051   1
   0   6 -34 408.667 149.305   5
   0   6 -34 495.282 118.168   4
   0   6  35 190.340 77.8112   2
   0   6 -35 359.737 147.752   5
   0   6 -35 400.505 102.663   4
   0   6  36 112.602 73.1017   2
   0   6 -36 265.098 123.991   5
   0   6 -36 271.567 92.4691   4
   0   6  37-41.5615 48.5431   2
   0   6 -37 12.6001 54.6554   5
   0   6 -37 41.5722 61.1379   4
   0   6  38 300.882 114.072   2
   0   6 -38 313.403 120.661   5
   0   6  39-4.01650 52.2619   2
   0   6 -39 79.3340 89.8747   5
   0   6  40 277.574 99.8700   2
   0   6 -40 178.788 135.206   5
   0   6 -41-12.7651 66.6906   5
   0  -7   0 420.105 116.115   5
   0   7   0 749.089 153.175   5
   0  -7   0 620.143 60.3584   4
   0  -7  -1 637.753 131.362   5
   0   7  -1 475.029 119.510   5
   0  -7   1 476.247 114.898   5
   0   7   1 620.895 133.765   5
   0  -7   1 389.433 39.9794   4
   0  -7  -1 514.253 58.1580   4
   0   7   2 4052.43 338.180   5
   0  -7   2 3696.34 313.038   5
   0  -7  -2 3620.19 309.547   5
   0   7  -2 3646.94 318.724   5
   0  -7  -2 3656.46 157.201   4
   0   7  -3 1954.43 236.788   5
   0  -7  -3 2129.55 237.962   5
   0   7   3 1927.73 236.684   5
   0  -7   3 1868.46 228.519   5
   0  -7  -3 2190.65 127.092   4
   0  -7   4 7523.65 453.462   5
   0   7   4 8169.35 476.820   5
   0   7  -4 7383.37 453.592   5
   0  -7  -4 7775.27 452.016   5
   0   7  -5 6676.55 435.129   5
   0  -7  -5 6701.74 421.541   5
   0  -7   5 6450.48 427.024   5
   0   7   5 7377.92 456.722   5
   0   7   5 6356.99 156.642   2
   0  -7   6 7871.66 473.186   5
   0  -7  -6 8623.48 477.650   5
   0   7   6 8902.53 501.679   5
   0   7  -6 8358.35 489.619   5
   0   7   6 8054.14 191.924   2
   0  -7  -7 706.778 136.556   5
   0   7  -7 1012.10 198.502   5
   0   7   7 874.716 166.191   5
   0   7   7 615.183 60.3911   2
   0   7   8 74.2781 58.6380   5
   0   7  -8-17.4484 121.459   5
   0  -7  -8-29.1513 56.5394   5
   0   7   8 22.0623 20.0358   2
   0   7  -9 1277.97 64.0455   2
   0   7  -9 1520.78 208.455   5
   0  -7  -9 1237.07 188.713   5
   0   7   9 1513.28 214.520   5
   0   7   9 1345.10 96.2578   2
   0   7 -10 3344.82 117.063   2
   0  -7 -10 3188.99 294.200   5
   0   7 -10 3613.01 329.896   5
   0   7  10 3383.33 318.035   5
   0   7  10 3169.25 153.470   2
   0   7 -11 645.647 57.1544   2
   0   7  11 512.235 123.472   5
   0   7 -11 708.104 158.588   5
   0  -7 -11 557.963 128.172   5
   0   7  11 617.292 77.2379   2
   0   7 -12 4365.16 157.184   2
   0  -7 -12 4292.91 246.501   3
   0   7  12 4304.32 196.899   2
   0  -7 -12 4535.18 360.036   5
   0   7  12 4524.06 373.532   5
   0   7 -12 5139.44 400.534   5
   0  -7 -13 830.843 109.481   3
   0   7 -13 770.457 71.9394   2
   0   7  13 987.494 100.800   2
   0   7 -13 909.567 181.577   5
   0  -7 -13 747.329 147.583   5
   0   7  13 729.190 156.644   5
   0   7 -14 3538.78 160.390   2
   0  -7 -14 3962.36 239.468   3
   0   7 -14 3535.01 339.084   5
   0   7  14 4199.94 367.113   5
   0  -7 -14 4054.85 344.755   5
   0  -7 -15-21.8350 24.5826   3
   0   7 -15 62.6088 26.3285   2
   0  -7 -15 103.789 86.3092   5
   0   7 -15 61.2190 72.2784   5
   0   7  15 53.9142 56.3914   5
   0  -7 -16 187.533 60.9078   3
   0   7 -16 120.008 38.5585   2
   0   7 -16 231.999 111.598   5
   0   7  16 135.153 72.0029   5
   0  -7 -17 2279.50 185.017   3
   0   7 -17 2554.24 157.622   2
   0   7  17 3096.77 322.099   5
   0   7  17 2911.24 190.993   2
   0  -7 -18 2152.34 181.349   3
   0   7 -18 1930.43 142.400   2
   0   7  18 2277.46 177.222   2
   0   7  18 2249.83 323.130   5
   0  -7 -19 62.5748 40.8774   3
   0  -7 -19-2.47788 39.3885   2
   0   7  19 52.9348 33.7962   2
   0   7 -19 28.3865 22.6308   2
   0   7 -19 14.8326 75.7837   5
   0  -7 -20 35.8699 25.0447   3
   0   7 -20 69.8588 38.9533   2
   0  -7 -20-54.5115 52.8189   2
   0   7  20 94.6962 44.0699   2
   0   7 -20 6.26621 45.1864   5
   0  -7 -21 509.846 83.3153   3
   0   7 -21 348.873 66.9244   2
   0  -7 -21 327.470 90.6095   2
   0   7  21 601.045 101.633   2
   0  -7 -21 790.173 217.281   1
   0   7 -21 700.601 179.156   5
   0   7 -21 540.425 70.2372   4
   0  -7 -22 2019.29 168.388   3
   0  -7 -22 1829.01 204.894   2
   0   7 -22 1735.19 153.187   2
   0  -7 -22 2162.52 329.777   1
   0   7  22 1982.73 180.425   2
   0   7 -22 2369.54 304.765   5
   0   7 -22 1962.50 140.518   4
   0  -7 -23 2580.59 184.193   3
   0   7 -23 2331.09 187.217   2
   0   7  23 2674.05 214.337   2
   0  -7 -23 2558.71 371.233   1
   0   7 -23 2619.59 326.811   5
   0   7 -23 2510.61 168.730   4
   0  -7 -24 241.294 59.2861   3
   0  -7 -24 275.508 134.522   1
   0   7  24 265.796 80.5047   2
   0   7 -24 241.236 60.0083   2
   0   7 -24 579.091 163.610   5
   0   7 -24 340.696 69.6488   4
   0   7 -25 40.9425 37.3430   2
   0  -7 -25 197.067 116.442   1
   0   7  25 122.276 63.5481   2
   0   7 -25 237.637 106.982   5
   0   7 -25 137.005 50.1033   4
   0   7  26 650.529 116.117   2
   0  -7 -26 671.025 202.090   1
   0   7 -26 634.012 105.588   2
   0   7 -26 874.555 191.084   5
   0   7 -26 757.429 108.241   4
   0  -7 -27 43.5670 79.0770   1
   0   7  27 26.2255 47.2615   2
   0   7 -27 84.0486 50.4918   2
   0   7 -27-13.2988 56.1418   5
   0   7 -27 17.7176 40.2921   4
   0   7  28 827.542 137.377   2
   0  -7 -28 1056.19 249.139   1
   0   7 -28 1203.75 234.402   5
   0   7  29 78.4630 61.7649   2
   0   7 -29-27.8694 60.7219   5
   0   7  30 140.566 59.4274   2
   0  -7 -30 333.748 145.844   1
   0   7 -30 144.831 99.3640   5
   0  -7 -31 215.923 111.700   1
   0   7  31 213.347 73.9288   2
   0   7 -31 343.783 134.190   5
   0   7  32 52.1726 38.7578   2
   0  -7 -32 62.4462 102.130   1
   0   7 -32 68.8217 50.8067   5
   0  -7 -33 229.318 155.014   1
   0   7  33 87.7902 67.7672   2
   0   7 -33 133.497 95.6013   5
   0   7  34 108.315 67.8688   2
   0   7 -34 150.751 105.015   5
   0  -7 -35 74.4233 81.2337   1
   0   7  35 122.014 61.9421   2
   0   7 -35 69.3637 65.1295   5
   0  -7 -36 460.127 191.100   1
   0   7  36 425.249 127.924   2
   0   7 -36 649.468 208.960   5
   0   7  37 383.774 121.995   2
   0   7 -37 617.964 199.600   5
   0   7  38 86.3164 41.4295   2
   0   7 -38 268.772 150.084   5
   0   7  39 159.112 105.317   2
   0   7 -39 91.3960 139.885   5
   0   8   0 1454.34 220.799   5
   0  -8   0 1088.34 76.7024   4
   0   8  -1 191.210 82.1369   5
   0   8   1 113.924 68.7109   5
   0  -8  -1 161.009 34.1256   4
   0   8   2 385.034 124.589   5
   0   8  -2 363.478 115.642   5
   0  -8  -2 406.321 58.4284   4
   0   8  -3 1402.32 218.863   5
   0   8   3 1496.86 224.608   5
   0  -8  -3 1357.23 108.306   4
   0   8  -4 1399.98 213.821   5
   0   8   4 1359.32 215.695   5
   0  -8  -4 1507.51 119.954   4
   0   8   5 1539.23 226.028   5
   0   8  -5 1480.54 217.525   5
   0  -8  -5 1672.08 129.994   4
   0   8   6 1049.54 183.427   5
   0   8  -6 934.346 176.908   5
   0  -8  -6 1072.12 107.594   4
   0   8  -7-48.1578 48.4983   5
   0   8   7 104.404 79.8559   5
   0   8  -8 1688.55 246.351   5
   0   8   8 1574.87 231.286   5
   0   8   8 1524.72 98.0024   2
   0   8  -9 441.211 119.859   5
   0   8   9 374.633 120.950   5
   0   8   9 326.107 50.2110   2
   0   8  10 2360.75 293.769   5
   0   8 -10 2805.66 324.459   5
   0   8  10 2143.53 127.838   2
   0  -8 -11 6443.87 330.231   3
   0   8 -11 7564.98 516.179   5
   0   8  11 6775.50 488.308   5
   0   8  11 6276.34 230.866   2
   0  -8 -12 471.346 99.0469   3
   0   8  12 396.783 123.879   5
   0   8 -12 329.553 153.549   5
   0   8  12 383.060 63.8035   2
   0  -8 -13 2325.82 203.984   3
   0   8  13 2118.45 144.956   2
   0   8  13 2503.76 301.767   5
   0   8 -13 2622.75 307.898   5
   0   8 -14 1080.89 89.3339   2
   0  -8 -14 1102.29 139.604   3
   0   8 -14 1505.60 240.602   5
   0   8  14 1044.34 195.536   5
   0  -8 -15-1.96623 31.2705   3
   0   8 -15-8.92117 14.0228   2
   0   8 -15 56.5513 65.4536   5
   0   8  15 4.50325 38.0826   5
   0  -8 -16 147.660 49.7944   3
   0   8 -16 171.876 41.3938   2
   0   8 -16 92.8618 85.2046   5
   0   8  16 233.523 92.1194   5
   0  -8 -17 697.800 117.070   3
   0   8 -17 626.616 77.7365   2
   0   8  17 663.189 92.9218   2
   0   8 -17 651.238 167.965   5
   0   8  17 733.894 165.807   5
   0  -8 -18 562.178 130.351   3
   0   8 -18 488.080 71.6166   2
   0   8  18 601.883 92.3199   2
   0   8 -18 688.509 168.719   5
   0   8  18 411.931 130.552   5
   0   8 -19 652.322 84.8484   2
   0  -8 -19 682.322 113.400   3
   0   8  19 573.157 94.0856   2
   0   8 -19 681.200 176.813   5
   0   8  19 459.613 142.804   5
   0  -8 -20 415.387 91.1006   3
   0   8  20 470.266 88.8508   2
   0   8 -20 442.284 71.8183   2
   0   8 -20 818.128 195.700   5
   0   8  20 988.812 209.649   5
   0  -8 -21 2.15259 22.2855   3
   0   8 -21 117.448 118.264   5
   0   8 -21 12.6891 27.1303   2
   0   8  21 87.1391 49.0131   2
   0   8 -22 825.787 105.351   2
   0   8 -22 836.814 206.287   5
   0  -8 -22 986.078 229.823   1
   0   8  22 845.614 120.789   2
   0   8 -23 1137.75 127.271   2
   0  -8 -23 1268.39 268.700   1
   0   8  23 1223.03 146.408   2
   0   8 -23 1591.09 269.062   5
   0   8  24 261.006 73.5916   2
   0  -8 -24 416.462 177.095   1
   0   8 -24 568.915 176.146   5
   0  -8 -25-101.326 66.1048   1
   0   8  25-11.3112 35.6317   2
   0   8  26 945.721 139.473   2
   0  -8 -26 1285.38 292.687   1
   0   8 -26 1015.04 227.552   5
   0   8  27 20.0368 43.3762   2
   0  -8 -27-30.7494 84.9820   1
   0   8 -27 85.0340 99.4231   5
   0  -8 -28 514.432 192.576   1
   0   8  28 405.075 100.840   2
   0   8 -28 549.594 167.008   5
   0   8  29 281.835 86.1498   2
   0  -8 -29 71.5073 82.6089   1
   0   8 -29 332.557 137.458   5
   0   8  30 61.8440 51.4567   2
   0  -8 -30 123.622 124.634   1
   0   8 -30 7.54016 60.5479   5
   0   8  31 211.719 83.0633   2
   0  -8 -31 146.465 113.213   1
   0   8 -31 346.251 143.655   5
   0   8  32 164.553 80.9334   2
   0  -8 -32 229.900 147.711   1
   0   8 -32 236.443 124.933   5
   0   8  33 69.5065 68.0048   2
   0  -8 -33 151.946 155.463   1
   0   8 -33 108.948 95.2230   5
   0   8  34 452.926 131.652   2
   0   8 -34 709.029 205.939   5
   0   8  35 583.890 150.066   2
   0   8 -35 709.577 209.511   5
   0   8  36 149.445 96.4940   2
   0   8 -36 171.339 130.474   5
   0   8  37 1328.49 230.171   2
   0   9   0 20.3180 62.0806   5
   0   9  -1 28.1480 45.7531   5
   0   9   1 169.685 100.969   5
   0  -9  -1 114.507 29.9076   4
   0   9  -2 667.039 160.147   5
   0   9   2 928.691 193.367   5
   0  -9  -2 682.715 73.0537   4
   0   9   3 67.0408 65.1234   5
   0   9  -3 53.0947 81.5110   5
   0  -9  -3 48.8478 27.1877   4
   0   9   4 695.627 163.033   5
   0   9  -4 490.652 142.872   5
   0  -9  -4 504.556 73.2878   4
   0   9   5 2377.14 301.697   5
   0   9  -5 2202.16 291.348   5
   0  -9  -5 2145.33 155.458   4
   0   9  -6 588.317 154.949   5
   0   9   6 561.144 162.772   5
   0  -9  -6 485.445 77.3357   4
   0   9   7-57.9381 90.3925   5
   0   9  -7 1.54883 48.5706   5
   0  -9  -7 5.42592 23.2205   4
   0   9  -8 1756.39 280.046   5
   0   9   8 1409.28 236.570   5
   0  -9  -8 1336.40 137.159   4
   0   9   9 5092.68 451.819   5
   0   9  -9 5983.71 486.165   5
   0  -9  -9 4810.69 260.230   4
   0   9 -10 2454.09 324.605   5
   0   9  10 1724.25 276.785   5
   0  -9 -10 1780.38 164.664   4
   0   9  11 4712.55 438.178   5
   0   9 -11 4800.99 455.905   5
   0  -9 -11 4358.31 261.065   4
   0  -9 -12 1372.58 176.339   3
   0   9 -12 1394.11 256.390   5
   0   9  12 1499.18 246.507   5
   0  -9 -12 1402.29 152.912   4
   0  -9 -13 2798.49 241.535   3
   0   9  13 2648.80 166.861   2
   0   9 -13 3603.25 389.606   5
   0   9  13 3352.14 375.695   5
   0  -9 -14 150.623 63.2435   3
   0   9 -14 61.9834 69.1729   5
   0   9  14 62.0479 81.9546   5
   0  -9 -15 1747.37 195.519   3
   0   9 -15 1980.39 292.789   5
   0   9  15 2038.28 298.881   5
   0  -9 -16-1.51827 26.9423   3
   0   9 -16 74.6279 123.171   5
   0   9  16 3.49301 72.4836   5
   0  -9 -17 1226.01 163.330   3
   0   9  17 1433.85 142.663   2
   0   9 -17 1709.62 280.056   5
   0   9  17 1603.26 267.861   5
   0  -9 -18 456.602 104.161   3
   0   9  18 545.410 92.0672   2
   0   9 -18 803.336 194.217   5
   0   9  18 879.208 204.319   5
   0   9 -19 265.026 100.269   5
   0   9  19 223.950 94.5533   5
   0   9  20 284.820 71.8297   2
   0   9 -20 663.286 184.687   5
   0   9  20 435.054 148.439   5
   0   9  21-39.1793 33.5443   2
   0   9 -21 197.687 127.308   5
   0   9  21 102.226 86.5765   5
   0   9  22 74.4803 41.1782   2
   0   9 -22 178.499 123.290   5
   0  -9 -23 327.316 179.957   1
   0   9  23 324.712 82.3516   2
   0   9 -23 663.924 196.651   5
   0  -9 -24 201.136 104.936   1
   0   9  24 159.649 53.9633   2
   0   9 -24 401.045 164.780   5
   0  -9 -25 421.093 168.595   1
   0   9  25 161.574 50.2685   2
   0   9 -25 191.730 114.244   5
   0   9  26-29.4780 41.8081   2
   0  -9 -26 40.6771 106.258   1
   0   9 -26-84.6301 83.4958   5
   0  -9 -27 830.203 240.866   1
   0   9  27 363.332 94.1588   2
   0   9 -27 714.294 203.587   5
   0  -9 -28-92.6812 106.157   1
   0   9  28 19.4127 29.3500   2
   0   9 -28-0.53528 80.3956   5
   0  -9 -29 0.71691 64.6731   1
   0   9  29 106.056 58.9083   2
   0  -9 -30 385.128 190.752   1
   0   9  30 212.694 86.6921   2
   0   9 -30 587.591 196.091   5
   0   9  31 96.5496 74.4502   2
   0   9 -31 55.3154 91.4110   5
   0   9  32 477.664 129.021   2
   0   9 -32 665.008 204.003   5
   0  -9 -32 220.228 104.846   4
   0   9 -33 187.891 129.406   5
   0  -9 -33 147.851 96.4035   4
   0  10   0 2914.31 360.812   5
   0  10  -1 809.475 217.936   5
   0  10   1 633.318 173.462   5
   0  10   2 144.585 78.5545   5
   0  10  -2 192.259 131.038   5
   0 -10  -2 47.2694 24.5562   4
   0  10  -3 3694.50 402.944   5
   0  10   3 3296.99 375.596   5
   0 -10  -3 3172.06 171.057   4
   0  10   4 380.938 141.935   5
   0  10  -4 336.819 136.616   5
   0 -10  -4 336.790 60.6215   4
   0  10   5 3397.17 380.969   5
   0  10  -5 3124.03 373.056   5
   0 -10  -5 2807.41 183.578   4
   0  10   6 1719.75 280.004   5
   0  10  -6 2036.65 301.400   5
   0 -10  -6 1545.60 144.751   4
   0  10  -7 636.118 186.176   5
   0  10   7 427.666 143.234   5
   0 -10  -7 370.994 78.8204   4
   0  10  -8 630.973 170.629   5
   0  10   8 736.094 181.167   5
   0 -10  -8 555.276 90.9703   4
   0  10   9 645.530 178.710   5
   0  10  -9 1202.46 243.967   5
   0 -10  -9 704.104 105.931   4
   0  10 -10 1873.12 297.374   5
   0  10  10 1617.24 272.592   5
   0 -10 -10 1513.05 158.952   4
   0  10 -11 949.768 217.704   5
   0  10  11 794.673 201.223   5
   0 -10 -11 614.563 107.376   4
   0  10  12 151.374 111.313   5
   0 -10 -12 225.150 66.0845   4
   0  10  13 628.507 180.265   5
   0  10 -13 524.097 166.087   5
   0 -10 -13 644.227 112.900   4
   0  10 -14 782.299 185.538   5
   0 -10 -14 730.316 126.114   4
   0  10  14 848.469 210.633   5
   0  10 -15 230.093 115.354   5
   0 -10 -15 79.0117 49.7691   4
   0  10  15 83.6647 101.569   5
   0  10 -16 324.789 123.833   5
   0  10  16 504.133 156.498   5
   0 -10 -16 295.047 86.8302   4
   0  10 -17 75.9477 78.9089   5
   0  10  17 136.728 106.515   5
   0 -10 -17-59.8139 49.6090   4
   0  10 -18 112.126 83.1060   5
   0  10  18 125.467 110.293   5
   0 -10 -18 141.998 71.4042   4
   0  10 -19 479.744 161.676   5
   0  10  19 240.409 113.951   5
   0 -10 -19 337.132 98.2517   4
   0  10 -20 322.552 136.320   5
   0  10  20 122.624 82.5897   5
   0 -10 -20 218.305 80.2881   4
   0  10 -21 142.160 116.725   5
   0 -10 -21 107.155 65.4827   4
   0  10  21 191.506 118.491   5
   0  10 -22 455.974 179.391   5
   0 -10 -22 390.386 104.130   4
   0  10 -23 164.977 111.978   5
   0 -10 -23 120.437 75.7712   4
   0 -10 -24 157.692 153.764   1
   0  10 -24 141.596 125.189   5
   0 -10 -24 68.4021 63.3216   4
   0 -10 -25 37.6928 149.549   1
   0  10 -25 57.6613 62.7788   5
   0 -10 -25 107.195 65.4161   4
   0 -10 -26 594.051 229.002   1
   0  10 -26 542.272 182.353   5
   0 -10 -26 355.637 114.761   4
   0  10 -27 71.6293 89.7957   5
   0 -10 -27 2.00078 40.2450   4
   0  10 -28 951.628 259.068   5
   0 -10 -28 469.633 157.368   4
   0 -10 -29 104.958 84.7645   4
   0 -10 -30 40.1065 59.2949   4
   0 -10 -31-7.32440 45.6169   4
   0 -10 -32-4.39699 65.6562   4
   0  11   0 0.49271 56.9522   5
   0  11   1 611.482 187.927   5
   0  11  -1 712.681 185.289   5
   0  11   2 1146.97 243.058   5
   0  11  -2 1616.24 294.067   5
   0  11   3 1238.91 253.872   5
   0  11  -3 973.872 224.372   5
   0  11  -4 1481.27 283.521   5
   0  11   4 1462.08 266.121   5
   0  11   5 429.734 161.522   5
   0  11  -5 634.564 194.839   5
   0  11  -6 830.033 211.702   5
   0  11   6 636.643 172.833   5
   0  11  -7 2247.62 340.976   5
   0  11   7 2587.58 358.955   5
   0  11  -8 173.611 116.749   5
   0  11   8 89.9762 98.9610   5
   0  11   9 962.513 227.191   5
   0  11  -9 1155.10 248.648   5
   0  11 -10 121.129 102.561   5
   0  11  10 117.848 78.2130   5
   0 -11 -10 154.298 54.9301   4
   0  11  11 36.2150 77.8867   5
   0  11 -11-41.8294 59.0198   5
   0 -11 -11 68.5867 51.5594   4
   0  11 -12 1033.35 241.403   5
   0  11  12 960.300 229.210   5
   0 -11 -12 870.558 134.833   4
   0  11 -13 55.6085 63.9386   5
   0  11  13 201.397 133.928   5
   0 -11 -13 75.0061 45.1192   4
   0  11 -14 898.970 223.914   5
   0  11  14 636.692 199.828   5
   0 -11 -14 749.223 132.566   4
   0  11 -15 171.705 122.410   5
   0 -11 -15 178.105 80.4049   4
   0  11  15 418.566 157.839   5
   0  11 -16-51.2479 62.3483   5
   0 -11 -16-8.07279 40.0050   4
   0  11  16-93.1528 85.0011   5
   0  11 -17 76.6121 61.2803   5
   0 -11 -17 170.200 80.5699   4
   0  11  17 156.197 96.3941   5
   0  11 -18 502.222 167.578   5
   0 -11 -18 397.655 105.009   4
   0  11  18 397.554 160.301   5
   0  11 -19 270.564 139.310   5
   0 -11 -19 266.553 94.9256   4
   0  11  19 147.082 119.046   5
   0  11 -20 413.156 156.442   5
   0  11  20 331.251 147.768   5
   0 -11 -20 244.820 91.6684   4
   0  11 -21-63.2132 71.2679   5
   0  11  21 148.629 115.318   5
   0 -11 -21 107.135 71.6319   4
   0  11 -22 124.771 89.9657   5
   0 -11 -22 35.8392 54.5058   4
   0  11  22 54.6548 64.2885   5
   0  11 -23 331.269 160.796   5
   0 -11 -23 212.498 104.595   4
   0 -11 -24 93.3370 75.1526   4
   0 -11 -25 91.7071 90.2632   4
   0 -11 -26 627.580 171.414   4
   0 -11 -27 7.78749 58.1589   4
   0 -11 -28 327.198 147.838   4
   0 -11 -29 99.1496 95.6468   4
   0 -11 -30 0.41174 84.2731   4
   0  12   0 29.7998 64.0070   5
   0  12  -1 125.792 110.613   5
   0  12   1 62.3095 81.7442   5
   0  12  -2 49.9387 73.7110   5
   0  12   2-55.4240 96.5739   5
   0  12  -3 151.207 97.6414   5
   0  12   3 113.362 76.0974   5
   0  12   4 693.850 185.492   5
   0  12  -4 763.271 228.409   5
   0  12   5 49.7552 88.9863   5
   0  12  -5-0.57059 75.3810   5
   0  12  -6 166.791 117.634   5
   0  12   6 176.543 108.453   5
   0  12  -7 32.7634 55.4014   5
   0  12   7-91.8939 95.7578   5
   0  12  -8 117.514 88.0452   5
   0  12   8 104.331 93.5161   5
   0  12  -9 26.7133 55.7491   5
   0  12   9 116.064 83.4413   5
   0  12 -10 368.690 157.659   5
   0  12  10 240.067 127.534   5
   0  12  11 147.972 104.097   5
   0  12 -11 94.4606 131.126   5
   0  12  12 125.923 100.481   5
   0  12 -12 315.806 145.618   5
   0  12 -13 400.901 171.923   5
   0  12  13 289.121 138.547   5
   0  12 -14 140.268 119.241   5
   0  12  14 62.1785 101.955   5
   0  12 -15 214.758 119.741   5
   0  12  15 83.8715 116.144   5
   0  12  16 211.528 133.178   5
   0  12  17-142.287 131.373   5
   0  12  18-8.44059 121.500   5
   0  12  19 3.94847 128.339   5
   0  12  20 75.6301 120.233   5
   1   0   0-1.82505 19.2842   3
   1   0   1 15814.4 345.085   3
   1   0  -1 16010.2 350.776   3
   1   0   2 256.372 47.0548   3
   1   0  -2 323.973 54.2147   3
   1   0   3 2965.58 105.995   1
   1   0  -3 2962.82 153.212   3
  -1   0  -3 2899.34 143.864   3
   1   0   3 2859.26 147.261   3
  -1   0   3 2718.07 145.773   4
   1   0   4 28684.3 388.502   1
   1   0  -4 29704.4 486.510   3
  -1   0   4 29645.5 493.721   3
   1   0   4 29282.6 460.693   3
  -1   0   4 28221.8 466.018   4
  -1   0  -4 30192.9 459.020   3
   1   0   5 11871.8 276.507   1
  -1   0  -5 11940.5 283.735   3
   1   0   5 11899.8 295.144   3
   1   0  -5 11704.8 306.786   3
  -1   0   5 11840.7 299.123   4
  -1   0   5 12134.0 318.433   3
   1   0   6 2823.10 149.890   1
  -1   0  -6 2827.31 136.065   3
  -1   0   6 2916.10 156.763   3
   1   0  -6 2763.48 150.990   3
   1   0   6 2600.02 138.556   3
  -1   0   6 2811.51 148.196   4
   1   0   7 10089.9 302.339   1
  -1   0  -7 9828.25 251.169   3
   1   0   7 9711.00 265.547   3
  -1   0   7 10202.0 296.687   3
  -1   0   7 10026.3 278.586   4
   1   0   8 15391.7 398.484   1
  -1   0  -8 15327.4 306.427   3
  -1   0   8 14626.7 342.101   4
  -1   0   8 15085.7 366.019   3
   1   0   8 15057.2 329.826   3
   1   0   9 2642.53 176.383   1
   1   0  -9 2512.24 149.670   2
  -1   0  -9 2849.11 130.847   3
   1   0   9 2740.57 142.386   3
   1   0  -9 2882.99 171.388   4
  -1   0   9 2961.44 167.716   3
  -1   0   9 2738.19 146.755   4
   1   0 -10 2796.14 157.370   2
  -1   0  10 3448.69 212.939   1
   1   0  10 3192.32 204.953   1
  -1   0 -10 3049.32 132.369   3
  -1   0  10 3137.06 171.274   3
   1   0  10 3102.94 151.719   3
   1   0 -10 3089.31 182.245   4
   1   0 -11 199.288 49.8408   2
  -1   0  11 223.543 64.2141   1
   1   0  11 369.788 78.0490   1
   1   0  11 301.720 53.8563   3
  -1   0 -11 260.049 39.4224   3
  -1   0  11 326.003 73.7168   3
   1   0 -11 220.864 54.0712   4
   1   0  12 7331.09 342.363   1
  -1   0  12 7032.16 333.705   1
   1   0 -12 6954.34 249.999   2
  -1   0 -12 6856.10 278.740   2
  -1   0 -12 7313.54 193.855   3
   1   0  12 7280.25 233.448   3
  -1   0  12 6832.79 258.346   3
   1   0 -12 7153.45 289.029   4
   1   0  13 2246.65 199.236   1
   1   0 -13 2329.67 145.678   2
  -1   0  13 2504.68 207.691   1
  -1   0 -13 2036.53 155.984   2
  -1   0 -13 2148.86 102.192   3
  -1   0  13 2341.17 154.748   3
   1   0  13 2194.38 129.923   3
  -1   0  14 6855.65 353.812   1
   1   0 -14 6323.14 249.527   2
   1   0  14 6523.55 349.329   1
  -1   0 -14 6725.85 289.547   2
  -1   0 -14 6764.78 176.155   3
  -1   0  14 6663.84 258.423   3
   1   0  14 6497.42 221.484   3
  -1   0  15 2278.03 215.871   1
   1   0 -15 1922.56 138.951   2
   1   0  15 2413.95 221.528   1
  -1   0 -15 1998.96 162.071   2
  -1   0  15 2048.01 146.796   3
   1   0  15 2203.65 131.212   3
   1   0 -16 229.711 48.7599   2
   1   0  16 373.377 92.9386   1
  -1   0  16 355.066 93.1461   1
  -1   0 -16 262.980 62.6893   2
   1   0  16 278.297 46.2180   3
  -1   0  16 356.576 65.4032   3
  -1   0 -17 317.048 69.6393   2
  -1   0  17 161.992 63.7438   1
   1   0  17 189.664 74.7884   1
   1   0 -17 204.038 50.7169   2
   1   0  17 232.622 44.8284   3
  -1   0  17 287.338 61.7839   3
   1   0  18 1965.62 224.861   1
  -1   0  18 1749.33 206.087   1
   1   0 -18 1757.40 141.554   2
  -1   0 -18 2225.54 192.375   2
   1   0  18 1860.03 121.882   3
  -1   0  18 1804.67 140.431   3
  -1   0 -19 16.8682 40.9039   2
  -1   0  19 29.8172 46.5518   1
   1   0  19 13.5162 59.6158   1
   1   0 -19-3.51707 20.8860   2
   1   0  19 76.8829 42.8122   3
  -1   0  19 53.2571 45.7796   3
   1   0 -20 3890.99 219.651   2
  -1   0  20 3786.57 327.599   1
   1   0  20 4109.68 344.184   1
  -1   0 -20 4829.64 302.439   2
   1   0  20 4056.84 181.789   3
  -1   0  20 4125.85 220.924   3
   1   0 -20 4398.93 296.326   4
   1   0 -21 19923.6 505.303   2
  -1   0  21 20966.7 783.334   1
   1   0  21 21234.6 800.780   1
  -1   0 -21 25232.2 719.298   2
  -1   0  21 19978.9 483.350   3
   1   0  21 19929.7 402.273   3
   1   0 -21 24381.3 684.312   4
   1   0 -22 13451.8 423.911   2
   1   0  22 14558.3 680.297   1
  -1   0  22 14522.4 673.716   1
  -1   0 -22 17068.5 614.478   2
   1   0  22 14581.5 443.545   2
  -1   0  22 13264.6 396.677   3
   1   0 -22 15858.8 568.376   4
   1   0  22 13733.3 334.982   3
   1   0 -23 2662.25 192.750   2
   1   0  23 2391.88 285.843   1
  -1   0  23 2495.67 285.870   1
   1   0  23 2979.41 206.750   2
  -1   0 -23 3363.48 290.066   2
   1   0  23 2885.33 154.321   3
  -1   0  23 2684.59 183.478   3
   1   0 -23 3758.89 288.128   4
  -1   0  24 8459.79 535.335   1
   1   0  24 7715.09 335.004   2
   1   0  24 8425.48 540.120   1
  -1   0 -24 9494.59 484.843   2
   1   0 -24 7382.72 332.893   2
   1   0  24 7392.62 242.749   3
  -1   0  24 7208.51 297.475   3
   1   0 -24 8250.60 427.121   4
   1   0 -25 65.7578 50.2476   2
  -1   0  25 205.347 104.479   1
   1   0  25 95.0645 52.1928   2
   1   0  25 70.2696 79.7726   1
  -1   0 -25 205.207 98.2925   2
   1   0  25 203.135 45.0462   3
  -1   0  25 151.934 55.1812   3
   1   0 -25 424.147 113.237   4
   1   0  26 3517.58 239.690   2
  -1   0  26 3280.38 201.224   3
   1   0  26 3447.55 159.938   3
   1   0 -26 4120.36 309.034   4
   1   0  27 1327.85 151.059   2
   1   0  27 1409.26 99.6067   3
  -1   0  27 1166.22 120.596   3
   1   0 -27 1449.76 184.016   4
   1   0  28 39.3960 24.4547   3
  -1   0  28-0.61836 23.5513   3
   1   0 -28 59.3708 60.7415   4
   1   0  29 1229.08 149.770   2
   1   0 -29 1125.30 172.731   4
   1   0  29 1096.27 77.9296   3
  -1   0  29 1098.73 115.660   3
   1   0  30 206.619 69.6851   2
  -1   0  30 72.0707 33.0958   3
   1   0 -30 80.9498 55.9237   4
   1   0  30 63.5246 18.7055   3
   1   0  31 149.699 69.6383   2
  -1   0  31 102.130 40.2430   3
   1   0 -31 122.154 51.7423   4
   1   0  32 137.641 69.3902   2
  -1   0  32 117.406 40.0223   3
   1   0 -32 24.1955 32.3663   4
   1   0  33 137.651 61.0962   2
  -1   0  33 105.881 33.4685   3
   1   0 -33 139.933 64.9328   4
   1   0  34 258.055 81.8351   2
  -1   0  34 242.046 47.7705   3
   1   0 -34 146.868 71.7085   4
   1   0  35 1213.16 176.660   2
   1   0 -35 1115.01 194.553   4
   1   0  36 147.045 68.7644   2
   1   0 -36 264.589 104.528   4
   1   0  37 1424.99 198.395   2
   1   0 -37 1213.11 204.246   4
   1   0  38 1417.31 201.871   2
   1   0 -38 937.937 182.609   4
   1   0  39 197.400 84.9742   2
   1   0 -39 154.053 93.5115   4
   1   0  40 1177.02 193.822   2
   1   0 -40 877.499 186.504   4
   1   0  41 118.516 71.4809   2
   1   0 -41 296.777 108.942   4
   1   0  42 31.9454 41.0634   2
   1   0 -42 41.1120 73.9190   4
   1   0 -43-71.0877 79.0123   4
   1   0 -44 238.451 127.359   4
   1   1 -44 96.9628 93.6466   4
   1   1 -43 418.252 148.911   4
   1  -1  42 73.9284 60.3672   2
   1   1 -42 60.2057 60.2861   4
   1  -1  41 250.147 99.7302   2
   1   1 -41 235.065 122.536   4
   1  -1  40 605.729 138.552   2
   1   1 -40 491.164 136.774   4
   1  -1  39 1359.29 201.559   2
   1   1 -39 902.260 184.436   4
   1  -1  38 624.943 138.114   2
   1   1 -38 383.753 129.049   4
   1  -1  37 921.924 158.213   2
   1   1 -37 931.653 178.603   4
   1  -1  36 512.644 122.536   2
   1   1 -36 398.648 113.195   4
   1  -1  35 300.144 94.5082   2
   1   1 -35 187.888 75.9481   4
   1  -1  34 1011.67 155.274   2
   1   1 -34 794.612 151.565   4
   1  -1  33 1497.61 179.961   2
   1  -1  33 1413.03 127.357   3
   1   1 -33 1309.02 195.515   4
   1  -1  32 342.389 94.8211   2
   1  -1  32 120.878 41.2814   3
   1   1 -32 231.822 88.4629   4
   1  -1  31 5377.90 325.318   2
   1   1 -31 4730.75 360.162   4
   1  -1  31 5126.75 249.194   3
   1  -1  30 2983.04 239.598   2
  -1   1  30 2758.73 115.371   3
   1  -1  30 2793.66 186.096   3
   1   1 -30 2958.38 281.942   4
   1  -1  29 945.738 135.696   2
  -1   1  29 713.273 66.9707   3
   1  -1  29 784.949 97.1916   3
   1   1 -29 827.438 147.267   4
   1  -1  28 664.797 110.732   2
   1  -1  28 561.586 83.3858   3
  -1   1  28 535.758 61.2906   3
   1   1 -28 647.171 132.759   4
   1  -1  27 3120.26 227.754   2
   1  -1  27 2473.25 173.110   3
   1   1 -27 2831.05 256.197   4
  -1   1  27 2974.85 149.893   3
   1  -1  26 7017.39 330.770   2
   1  -1  26 6518.90 276.929   3
   1   1 -26 6912.62 395.458   4
  -1   1  26 6947.23 235.844   3
   1  -1  25 535.968 154.352   1
   1  -1  25 676.069 111.963   2
  -1   1  25 423.301 132.190   1
   1   1 -25 488.273 88.3671   2
  -1   1  25 609.477 74.8007   3
   1  -1  25 688.509 93.9619   3
   1   1 -25 893.306 149.366   4
   1  -1  24 1019.02 207.028   1
  -1   1  24 1254.88 210.962   1
   1  -1  24 1078.45 124.690   2
   1   1 -24 1022.71 126.921   2
   1  -1  24 1198.98 118.862   3
  -1  -1 -24 1426.47 189.514   2
  -1   1  24 1194.50 103.447   3
   1   1 -24 1396.25 176.384   4
   1   1 -23 4417.72 245.347   2
  -1   1  23 4534.07 387.342   1
   1  -1  23 4465.64 248.310   2
   1  -1  23 4936.97 408.094   1
  -1  -1 -23 4743.65 328.257   2
   1  -1  23 4248.71 218.273   3
   1   1 -23 4580.29 301.139   4
  -1   1  23 3964.39 188.751   3
  -1   1  22 1127.88 197.615   1
   1  -1  22 1599.45 226.347   1
   1  -1  22 1361.55 137.006   2
   1   1 -22 1348.16 134.758   2
  -1  -1 -22 1408.35 177.281   2
   1  -1  22 1325.70 120.957   3
   1   1 -22 1764.60 189.583   4
  -1   1  22 1370.78 114.211   3
   1  -1  21 4667.02 374.597   1
   1   1 -21 3944.65 224.180   2
  -1   1  21 4361.71 372.408   1
  -1  -1 -21 4805.45 313.970   2
   1  -1  21 4440.38 234.218   2
   1  -1  21 3674.35 198.516   3
   1   1 -21 4211.12 279.185   4
  -1   1  21 4289.77 196.589   3
  -1   1  20 2278.65 258.235   1
   1  -1  20 2230.74 253.050   1
   1   1 -20 2341.54 166.935   2
   1  -1  20 2393.94 170.976   2
   1  -1  20 2435.34 160.823   3
  -1  -1 -20 2306.47 205.036   2
  -1   1  20 2349.64 146.782   3
  -1   1  19 1184.31 183.331   1
   1   1 -19 1173.28 118.519   2
  -1  -1 -19 1214.59 146.739   2
   1  -1  19 1255.22 122.037   2
   1  -1  19 1252.96 116.381   3
  -1   1  19 1249.50 108.442   3
   1   1 -18 3012.72 183.034   2
  -1   1  18 2893.49 273.305   1
  -1  -1 -18 2805.44 217.706   2
   1  -1  18 2970.48 179.955   2
   1  -1  18 2766.38 166.904   3
  -1   1  18 3122.43 169.147   3
   1   1 -17 418.965 71.2401   2
  -1   1  17 442.081 111.231   1
  -1  -1 -17 300.991 73.1097   2
   1  -1  17 517.605 74.7107   3
  -1   1  17 531.324 75.0390   3
   1   1 -16 2755.39 170.296   2
  -1   1  16 2945.48 258.410   1
  -1  -1 -16 2956.04 211.932   2
   1  -1  16 3021.23 173.155   2
   1  -1  16 2746.19 161.248   3
  -1  -1 -16 3072.03 99.7512   3
   1   1 -16 3069.72 208.342   4
  -1   1  16 2995.90 164.827   3
   1   1 -15 4940.27 224.001   2
  -1   1  15 4828.54 320.889   1
   1  -1  15 4984.12 217.146   2
   1  -1  15 5157.76 220.111   3
  -1  -1 -15 4804.98 258.165   2
  -1  -1 -15 5044.33 137.872   3
  -1   1  15 4941.68 209.996   3
   1   1 -15 5205.88 262.415   4
  -1   1  14 936.306 137.730   1
   1   1 -14 1000.93 99.9198   2
  -1  -1 -14 983.963 65.0348   3
   1  -1  14 1194.91 104.720   2
  -1  -1 -14 1001.93 117.147   2
   1  -1  14 1245.32 108.492   3
  -1   1  14 1288.13 111.415   3
   1   1 -14 1094.51 120.143   4
   1   1 -13 6066.19 241.643   2
  -1   1  13 6537.31 342.537   1
  -1  -1 -13 6835.38 349.612   1
   1  -1  13 6542.68 241.314   2
  -1  -1 -13 6116.52 172.003   3
  -1  -1 -13 6279.43 282.643   2
   1  -1  13 6577.63 242.235   3
  -1   1  13 6580.14 240.362   3
   1   1 -13 6375.53 275.802   4
  -1   1  12 2007.45 192.067   1
   1   1 -12 2054.04 138.497   2
  -1  -1 -12 2070.03 187.661   1
   1  -1  12 2141.74 135.547   2
   1  -1  12 2228.09 142.064   3
  -1  -1 -12 2155.29 106.524   3
   1   1 -12 2042.26 155.025   4
  -1   1  12 2421.83 148.301   3
  -1  -1 -11 5498.35 291.835   1
  -1   1  11 5610.82 297.427   1
   1   1 -11 5545.10 221.284   2
   1  -1  11 5460.80 219.979   3
   1  -1  11 5657.73 213.917   2
  -1   1  11 5635.32 221.479   3
   1   1 -11 5448.77 244.879   4
  -1  -1 -11 5546.94 177.822   3
   1   1 -10 20701.6 423.296   2
  -1  -1 -10 19081.9 523.145   1
  -1   1  10 19781.1 531.842   1
   1  -1  10 21198.1 408.420   2
   1  -1  10 20473.6 414.897   3
  -1  -1 -10 19167.5 344.946   3
   1   1 -10 21434.9 472.784   4
  -1   1  10 19843.5 408.109   3
  -1   1   9 9847.89 361.309   1
  -1  -1  -9 10251.2 363.252   1
   1  -1   9 11136.1 292.905   2
   1  -1   9 10780.6 302.942   3
  -1  -1  -9 9887.46 253.618   3
   1   1  -9 10989.6 331.168   4
  -1   1   9 10405.0 296.401   3
   1  -1   8 36509.0 512.164   2
   1  -1   8 34475.5 534.340   3
  -1   1   8 34152.4 635.504   1
  -1  -1  -8 35251.4 644.551   1
   1   1  -8 34571.9 458.628   5
  -1  -1  -8 34913.6 485.510   3
   1   1  -8 35458.4 577.022   4
  -1   1   8 35294.6 536.414   3
  -1   1   8 34095.5 520.597   4
   1  -1   7 43806.2 559.728   2
   1  -1   7 42836.9 590.988   3
  -1   1   7 42213.5 672.521   1
  -1  -1  -7 43852.2 685.324   1
   1   1  -7 44377.0 488.025   5
   1   1  -7 44735.8 633.357   4
  -1  -1  -7 43628.0 550.758   3
  -1   1   7 43009.3 591.798   3
  -1   1   7 43246.6 583.097   4
   1  -1   6 33009.5 513.154   3
  -1  -1  -6 33339.4 570.661   1
   1   1  -6 34685.8 411.368   5
  -1   1   6 33710.9 308.454   5
  -1  -1  -6 33087.7 487.938   3
  -1   1   6 32996.9 508.066   4
   1   1  -6 34492.6 546.993   4
  -1   1   6 33235.7 513.479   3
   1  -1   5 13136.2 325.282   3
   1   1  -5 13808.8 253.030   5
  -1   1   5 13365.2 320.745   4
  -1   1   5 13396.2 322.462   3
  -1  -1  -5 13683.9 315.922   3
   1  -1   4 5354.55 204.510   3
   1   1  -4 5508.32 157.567   5
  -1  -1  -4 6104.05 236.545   5
  -1   1   4 5633.50 205.020   4
  -1   1   4 5949.39 213.879   3
  -1  -1  -4 5772.63 207.816   3
   1  -1   3 84471.6 821.281   3
  -1   1   3 87601.3 813.285   3
  -1   1   3 86440.1 493.849   5
  -1  -1  -3 87776.8 850.902   5
   1   1  -3 86885.1 636.841   5
  -1  -1  -3 88951.0 816.615   3
  -1   1   3 86289.0 798.896   4
   1  -1   2 41655.7 572.921   3
   1   1  -2 42395.9 453.906   5
  -1  -1  -2 42063.7 556.068   5
  -1   1   2 41734.9 561.246   4
  -1  -1  -2 43127.9 575.234   3
   1  -1   1 6812.84 233.913   3
   1   1  -1 6742.81 188.997   5
  -1  -1  -1 7315.20 218.498   5
   1   1   0 29066.0 416.709   5
  -1  -1   0 28419.9 411.785   5
   1  -1   0 28651.9 477.584   3
  -1  -1   1 6640.65 186.849   5
   1   1   1 7439.75 225.471   5
   1  -1  -1 7407.57 246.865   3
  -1  -1   2 40690.8 444.884   5
   1  -1  -2 41362.4 585.255   3
  -1  -1   3 83493.3 625.749   5
   1  -1  -3 86472.0 846.728   3
  -1   1  -4 5186.14 190.022   3
   1  -1  -4 5767.86 197.334   1
  -1  -1   4 5204.59 154.264   5
   1  -1  -4 5573.31 217.655   3
  -1  -1   4 5266.24 202.334   4
  -1   1  -5 13916.6 307.071   3
   1  -1  -5 13907.8 326.169   1
  -1  -1   5 13077.8 245.168   5
   1   1   5 13751.7 305.835   3
   1  -1  -5 13101.1 330.886   3
  -1  -1   5 13901.1 320.476   4
  -1   1  -6 33395.9 473.570   3
   1  -1  -6 32458.3 535.838   1
   1  -1  -6 33211.6 297.124   5
  -1  -1   6 31775.6 488.327   4
   1  -1  -6 32518.7 525.603   3
   1   1   6 32083.6 465.655   3
  -1   1  -7 43639.2 535.262   3
   1  -1  -7 43052.9 657.114   1
   1  -1  -7 42993.8 368.478   5
  -1  -1   7 43197.3 571.651   4
   1   1   7 44325.7 538.756   3
   1  -1  -7 42922.3 607.566   3
  -1   1  -8 34590.6 471.527   3
   1  -1  -8 33529.8 502.670   2
   1  -1  -8 34737.7 617.172   1
   1  -1  -8 34180.1 364.103   5
   1   1   8 34235.6 470.074   3
  -1  -1   8 33538.1 508.312   4
   1  -1  -8 33832.2 543.049   3
  -1   1  -9 10438.6 256.236   3
   1  -1  -9 9945.59 277.377   2
   1  -1  -9 10285.9 355.736   1
   1  -1  -9 9524.22 211.029   5
   1   1   9 10003.9 255.332   3
  -1  -1   9 10494.7 284.855   4
   1  -1  -9 9371.88 286.873   3
  -1   1 -10 20363.5 353.621   3
   1   1  10 18925.4 530.494   1
   1  -1 -10 19301.0 393.331   2
   1  -1 -10 20127.9 520.294   1
   1  -1 -10 19052.1 327.076   5
   1  -1 -10 19391.5 407.513   3
   1   1  10 18844.4 342.672   3
  -1   1 -11 5221.19 177.200   3
   1  -1 -11 5490.56 282.978   1
   1  -1 -11 5475.65 212.607   2
   1   1  11 5134.15 289.822   1
   1  -1 -11 5492.42 190.038   5
   1  -1 -11 5440.38 214.341   3
   1   1  11 5399.16 182.824   3
  -1   1 -12 2091.85 147.360   2
   1  -1 -12 1984.89 130.926   2
   1   1  12 2093.18 194.700   1
   1  -1 -12 2119.03 126.984   5
   1  -1 -12 2126.13 134.410   3
   1   1  12 2172.37 115.733   3
   1  -1 -13 6191.56 235.311   2
   1   1  13 6260.88 340.515   1
  -1   1 -13 5910.76 263.764   2
   1   1  13 6060.50 186.341   3
   1  -1 -14 903.913 93.3089   2
   1   1  14 1093.15 150.917   1
  -1   1 -14 1054.46 117.410   2
   1   1  14 1111.31 81.2005   3
   1  -1 -15 4703.75 215.594   2
   1   1  15 4866.38 324.107   1
  -1   1 -15 5147.25 261.797   2
   1   1  15 4752.47 158.793   3
   1  -1 -16 3067.86 177.221   2
   1   1  16 3186.21 272.773   1
  -1   1 -16 3124.76 207.644   2
   1   1  16 3000.16 123.045   3
   1   1  17 444.857 104.804   1
  -1   1 -17 397.826 80.7816   2
   1  -1 -17 318.277 58.2842   2
   1   1  17 406.032 47.6038   3
   1   1  18 2899.36 274.772   1
   1  -1 -18 2715.52 173.625   2
  -1   1 -18 3232.29 226.765   2
   1   1  18 2638.29 107.360   3
   1   1  19 1122.20 179.695   1
   1  -1 -19 1117.91 115.475   2
  -1   1 -19 1694.27 177.706   2
   1   1  20 2187.78 254.247   1
   1  -1 -20 2028.48 158.029   2
  -1   1 -20 2817.87 235.907   2
   1  -1 -21 4104.42 229.783   2
   1   1  21 4627.34 377.698   1
  -1   1 -21 5199.31 333.917   2
   1   1  22 1603.12 232.609   1
   1  -1 -22 1271.36 133.732   2
  -1   1 -22 1991.12 216.834   2
   1  -1 -22 1683.22 203.747   4
   1   1  23 4181.56 380.496   1
  -1  -1  23 4043.95 360.992   1
   1   1  23 4142.96 243.013   2
   1  -1 -23 4080.65 241.180   2
   1  -1 -23 4786.30 338.637   4
  -1  -1  24 855.983 170.017   1
   1   1  24 1075.28 199.085   1
  -1   1 -24 1461.84 200.098   2
   1  -1 -24 1036.28 125.789   2
   1   1  24 1220.16 141.070   2
  -1  -1  24 1024.88 124.985   3
   1  -1 -24 1211.25 175.164   4
  -1   1 -25 697.590 136.662   2
  -1  -1  25 613.033 150.101   1
   1   1  25 515.563 98.4897   2
   1   1  25 515.927 144.508   1
   1  -1 -25 915.116 162.690   4
  -1  -1  25 597.387 100.306   3
   1   1  26 6499.89 327.181   2
  -1  -1  26 6516.72 314.945   3
   1  -1 -26 7133.88 418.881   4
   1   1  27 3011.59 228.460   2
   1  -1 -27 3243.16 282.851   4
  -1  -1  27 2504.50 197.723   3
   1   1  28 538.933 102.417   2
   1  -1 -28 573.734 126.232   4
  -1  -1  28 465.525 87.9380   3
   1   1  29 914.520 132.755   2
  -1  -1  29 846.753 120.163   3
   1  -1 -29 871.404 157.145   4
   1   1  30 3242.27 250.226   2
  -1  -1  30 2803.94 210.513   3
   1  -1 -30 2834.30 281.592   4
   1   1  31 4993.52 316.876   2
  -1  -1  31 4840.12 277.888   3
   1  -1 -31 5220.14 374.991   4
   1   1  32 236.051 88.9857   2
  -1  -1  32 75.0750 40.9944   3
   1  -1 -32 131.311 73.5003   4
   1   1  33 1916.23 207.784   2
   1  -1 -33 1259.37 197.498   4
  -1  -1  33 1294.69 144.800   3
   1   1  34 846.441 146.182   2
   1  -1 -34 936.914 165.286   4
  -1  -1  34 849.627 119.718   3
   1   1  35 491.611 111.872   2
   1  -1 -35 234.464 85.1135   4
  -1  -1  35 244.940 66.3757   3
   1   1  36 653.421 136.305   2
  -1  -1  36 410.582 80.9834   3
   1  -1 -36 306.726 109.736   4
   1   1  37 1112.91 174.289   2
   1  -1 -37 858.940 178.466   4
   1   1  38 480.352 120.559   2
   1  -1 -38 252.604 117.908   4
   1   1  39 1268.90 197.263   2
   1  -1 -39 923.553 187.472   4
   1   1  40 264.699 99.4571   2
   1  -1 -40 545.131 146.884   4
   1   1  41 108.025 80.9802   2
   1  -1 -41 190.007 102.037   4
   1   1  42 141.929 75.0807   2
   1  -1 -42-39.3085 77.8489   4
   1  -1 -43 432.410 154.309   4
   1   2 -45 135.059 113.493   4
   1   2 -44 127.996 105.066   4
   1  -2  43 191.053 90.1263   2
   1   2 -43 98.9345 91.5854   4
   1  -2  42 410.192 123.585   2
   1   2 -42 458.844 152.471   4
   1  -2  41 302.110 114.404   2
   1   2 -41 284.354 108.744   4
   1  -2  40 206.394 98.0739   2
   1   2 -40 395.469 136.808   4
   1  -2  39 781.613 157.730   2
   1   2 -39 571.132 155.476   4
   1  -2  38-2.86438 40.8718   2
   1   2 -38 20.0245 47.6939   4
   1  -2  37 266.068 92.6446   2
   1   2 -37 285.564 112.855   4
   1  -2  36 75.7351 62.8412   2
   1   2 -36 13.2964 42.5647   4
   1  -2  35 740.339 134.231   2
   1   2 -35 571.385 137.382   4
   1  -2  34 225.319 77.9891   2
   1   2 -34 122.231 69.4032   4
   1  -2  33 138.628 55.0658   2
   1  -2  33 266.665 65.1626   3
   1   2 -33 134.691 62.3293   4
   1  -2  32 1174.15 156.030   2
   1  -2  32 1117.96 138.009   3
   1   2 -32 1287.63 194.096   4
   1  -2  31 3200.44 252.803   2
   1  -2  31 3478.06 238.206   3
   1   2 -31 3465.80 300.644   4
   1  -2  30 302.119 86.0309   2
   1  -2  30 223.524 62.0997   3
   1   2 -30 413.002 116.378   4
   1  -2  29 1694.41 175.381   2
   1  -2  29 1579.22 157.805   3
   1   2 -29 1569.91 198.416   4
   1  -2  28 1673.81 170.822   2
   1  -2  28 1535.30 154.477   3
   1   2 -28 1674.60 200.463   4
   1  -2  27 290.692 73.7280   2
   1  -2  27 235.416 62.5054   3
   1   2 -27 292.732 90.0704   4
   1  -2  26 923.760 123.595   2
  -1   2  26 991.100 162.975   2
  -1   2  26 937.672 53.8451   3
   1  -2  26 788.898 108.137   3
   1   2 -26 962.482 148.523   4
  -1   2  25 3074.20 274.573   2
   1  -2  25 2537.24 192.503   2
   1   2 -25 3022.98 211.948   2
   1  -2  25 2572.66 191.914   3
  -1   2  25 2800.10 103.941   3
   1   2 -25 2715.35 239.846   4
  -1   2  24 1414.18 196.163   2
   1  -2  24 1018.91 124.395   2
   1   2 -24 931.030 114.793   2
   1  -2  24 910.545 115.384   3
  -1   2  24 1004.02 68.2216   3
  -1  -2 -24 1387.76 183.778   2
   1   2 -24 1000.81 144.310   4
   1  -2  23 3996.81 231.582   2
   1   2 -23 3879.35 230.512   2
  -1   2  23 4858.49 349.697   2
  -1   2  23 4294.34 149.463   3
  -1  -2 -23 4861.37 324.839   2
   1  -2  23 3894.86 229.425   3
   1   2 -23 4476.04 293.509   4
   1  -2  22 248.747 71.1050   2
  -1  -2 -22 207.098 67.9227   2
  -1   2  22 398.234 126.222   2
   1   2 -22 231.464 60.0827   2
   1  -2  22 291.079 66.7577   3
  -1   2  22 256.709 41.9228   3
   1   2 -22 328.440 97.4581   4
   1   2 -21 2179.32 166.193   2
   1  -2  21 1792.37 146.399   2
  -1   2  21 2374.22 236.365   2
   1  -2  21 1848.56 154.633   3
  -1  -2 -21 2116.30 204.956   2
  -1   2  21 1879.83 106.846   3
  -1   2  20 171.334 83.4259   2
  -1  -2 -20 81.6637 74.9701   1
  -1  -2 -20 146.736 60.9307   2
   1  -2  20 71.8304 41.5545   2
   1   2 -20 156.269 48.6616   2
  -1   2  20 112.771 29.9821   3
   1  -2  20 81.3187 32.0316   3
  -1  -2 -19 1240.70 190.226   1
  -1   2  19 1391.63 165.307   2
   1   2 -19 1034.90 109.913   2
   1  -2  19 947.702 108.096   3
   1  -2  19 952.367 100.550   2
  -1   2  19 1016.97 82.2617   3
  -1  -2 -19 1097.00 138.223   2
   1   2 -18 301.589 62.0597   2
  -1  -2 -18 333.632 80.1487   2
   1  -2  18 347.446 60.1469   2
  -1   2  18 387.385 53.8854   3
   1  -2  18 336.136 64.6871   3
   1   2 -17 3618.89 198.895   2
   1  -2  17 3940.99 196.268   2
   1  -2  17 3864.57 211.454   3
  -1  -2 -17 3915.74 246.707   2
  -1   2  17 3729.00 161.046   3
  -1  -2 -17 3569.69 101.800   3
   1   2 -17 4000.65 238.944   4
   1   2 -16 991.568 103.266   2
  -1  -2 -16 881.002 130.754   2
   1  -2  16 1303.88 126.582   3
  -1   2  16 1223.00 98.8131   3
   1  -2  16 969.568 98.0792   2
  -1  -2 -16 780.491 56.0076   3
   1   2 -16 1097.58 135.380   4
   1   2 -15 29412.6 545.834   2
   1  -2  15 31002.1 584.623   3
  -1   2  15 29853.0 464.395   3
   1  -2  15 30422.0 515.164   2
  -1  -2 -15 29806.0 664.961   2
  -1  -2 -15 29738.1 382.615   3
   1   2 -15 31579.2 640.683   4
  -1  -2 -14 18374.9 634.238   1
   1   2 -14 18816.6 431.903   2
   1  -2  14 19834.3 462.729   3
  -1   2  14 19838.1 382.284   3
   1  -2  14 19705.9 404.825   2
  -1  -2 -14 18951.0 328.970   3
   1   2 -14 20259.9 502.170   4
  -1   2  13 2632.53 143.504   3
   1  -2  13 2237.36 135.658   2
   1  -2  13 2555.16 166.870   3
   1   2 -13 2129.19 147.505   2
  -1  -2 -13 1774.88 200.755   1
  -1  -2 -13 2332.77 215.196   5
  -1  -2 -13 2192.18 117.242   3
   1   2 -13 2238.41 162.453   4
   1  -2  12 200.615 55.7732   3
  -1   2  12 255.968 55.8298   3
  -1  -2 -12 27.8928 16.6040   3
  -1  -2 -12 77.8052 41.3180   1
   1  -2  12 135.186 36.4002   2
   1   2 -12 157.259 40.5579   2
   1   2 -12 124.562 37.1055   5
  -1  -2 -12 56.0043 33.6782   5
   1   2 -12 82.1621 36.4543   4
   1  -2  11 5708.76 202.878   2
  -1   2  11 5135.13 196.658   3
   1  -2  11 5661.39 238.624   3
   1   2 -11 5567.41 224.606   2
  -1  -2 -11 5101.77 309.266   1
  -1  -2 -11 5314.84 301.484   5
   1   2 -11 5850.80 253.424   5
  -1  -2 -11 5147.34 189.774   3
   1   2 -11 5769.23 248.599   4
   1  -2  10 5281.03 191.932   2
  -1   2  10 5239.79 200.183   3
   1  -2  10 5249.79 231.930   3
   1   2 -10 4969.87 210.645   2
  -1  -2 -10 4582.37 284.375   1
   1   2 -10 5227.17 233.180   5
  -1  -2 -10 4855.35 279.498   5
   1   2 -10 4996.20 226.604   4
  -1  -2 -10 4541.69 180.424   3
   1  -2   9 43125.1 539.482   2
   1  -2   9 42753.6 639.067   3
  -1   2   9 42433.1 563.427   3
  -1  -2  -9 42972.3 835.825   1
  -1   2   9 43315.6 570.306   5
   1   2  -9 42600.2 648.034   5
  -1  -2  -9 42713.2 802.568   5
  -1  -2  -9 41438.7 553.854   3
   1   2  -9 42078.3 639.146   4
   1  -2   8 36903.6 589.374   3
  -1   2   8 37279.7 529.947   3
   1  -2   8 37262.1 488.733   2
  -1   2   8 37386.1 508.528   5
  -1  -2  -8 37086.9 728.769   5
   1   2  -8 37207.7 590.007   5
  -1  -2  -8 37474.5 533.610   3
   1   2  -8 36868.3 585.780   4
   1  -2   7 872.317 107.295   3
   1  -2   7 906.566 75.8060   2
  -1   2   7 1025.80 105.828   3
  -1  -2  -7 925.122 111.581   5
   1   2  -7 914.631 90.0015   5
  -1   2   7 1007.74 81.8455   5
   1  -2   6 5553.25 184.817   2
   1  -2   6 5694.95 226.757   3
  -1   2   6 5843.64 211.616   3
   1   2  -6 5504.87 217.402   5
  -1  -2  -6 5374.59 258.599   5
  -1   2   6 5635.57 187.900   5
  -1   2   6 5813.04 210.256   4
  -1   2   5 19554.0 385.248   3
   1  -2   5 18155.4 408.221   3
  -1  -2  -5 19488.9 474.788   5
   1   2  -5 18985.2 401.998   5
  -1   2   5 20127.4 348.583   5
  -1   2   5 19540.8 385.878   4
  -1   2   4 92601.1 837.021   3
   1  -2   4 92527.4 913.527   3
  -1   2   4 96397.5 767.609   5
  -1  -2  -4 93366.3 1008.73   5
   1   2  -4 93992.9 883.531   5
  -1   2   4 92719.6 830.637   4
   1  -2   3 60203.8 734.427   3
  -1   2   3 58902.5 667.385   3
   1   2  -3 59137.1 705.912   5
  -1   2   3 59265.4 608.171   5
  -1  -2  -3 57824.3 772.038   5
  -1   2   3 57719.9 651.631   4
  -1   2   2 18886.0 376.246   3
   1  -2   2 17906.1 403.500   3
  -1   2   2 18385.1 353.482   5
   1   2  -2 18364.5 394.366   5
  -1  -2  -2 18947.5 425.039   5
  -1   2   2 18493.6 364.957   4
   1  -2   1 158047. 1181.11   3
  -1   2   1 156992. 1042.94   5
  -1  -2  -1 152978. 1183.41   5
   1   2  -1 157896. 1170.25   5
  -1   2   1 154462. 1048.14   4
   1  -2   0 2448.91 152.672   3
   1   2   0 2198.54 142.577   5
  -1   2   0 2422.28 136.878   5
  -1  -2   0 2309.57 144.626   5
  -1   2   0 2315.80 131.213   4
   1  -2  -1 154228. 1186.98   3
   1   2   1 155240. 1214.95   5
  -1  -2   1 154656. 1138.33   5
   1  -2  -2 19045.7 416.006   3
   1  -2  -2 18917.2 364.739   5
  -1  -2   2 18278.2 388.117   5
   1   2   2 19433.3 440.208   5
   1  -2  -2 20273.6 407.385   4
   1  -2  -3 58671.8 732.413   3
   1  -2  -3 58082.7 611.013   5
  -1  -2   3 58259.6 687.801   5
   1  -2  -3 59697.1 708.383   4
   1  -2  -4 93803.5 928.110   3
   1  -2  -4 92256.5 761.371   5
  -1  -2   4 92007.0 863.403   5
   1  -2  -4 95492.8 920.404   4
   1  -2  -5 19986.6 430.632   3
  -1   2  -5 18939.9 375.009   3
  -1  -2   5 18510.7 391.133   5
   1  -2  -5 19023.2 343.999   5
  -1  -2   5 18708.3 375.421   4
   1  -2  -5 20970.6 440.468   4
   1  -2  -6 5343.80 224.199   3
  -1   2  -6 5667.91 202.959   3
  -1  -2   6 5589.40 217.525   5
   1  -2  -6 5216.42 180.764   5
  -1  -2   6 5489.08 202.075   4
   1  -2  -6 5700.28 236.844   4
  -1   2  -7 954.177 84.6018   3
   1   2   7 969.258 94.1759   2
   1  -2  -7 973.543 81.2185   2
   1  -2  -7 972.221 79.0153   5
  -1  -2   7 968.703 92.9260   5
   1  -2  -7 923.605 94.8013   3
  -1  -2   7 881.596 80.5479   4
   1  -2  -7 1113.32 113.526   4
   1   2   8 38646.1 581.037   2
   1  -2  -8 37608.9 509.028   2
   1  -2  -8 38349.0 741.710   1
   1  -2  -8 37306.2 494.862   5
   1  -2  -8 38992.7 637.613   4
   1  -2  -8 37435.6 599.674   3
  -1  -2   8 35485.6 509.998   4
   1   2   9 43077.1 627.212   2
   1  -2  -9 41929.1 551.391   2
   1  -2  -9 43518.4 818.388   1
   1  -2  -9 41774.8 546.320   5
   1  -2  -9 44434.2 694.951   4
  -1  -2   9 40905.5 550.575   4
   1  -2  -9 42418.8 636.156   3
   1   2  10 4894.38 216.926   2
   1  -2 -10 4616.97 275.576   1
   1  -2 -10 4582.83 184.967   2
   1  -2 -10 4406.65 183.102   5
   1  -2 -10 4636.61 211.310   3
  -1  -2  10 4798.15 189.121   4
   1   2  11 5310.15 230.990   2
   1  -2 -11 5089.24 201.663   2
   1  -2 -11 4961.98 305.061   1
   1  -2 -11 5021.52 202.732   5
   1  -2 -11 5175.78 222.780   3
   1  -2 -12 64.1937 25.2779   3
   1  -2 -12 51.2035 38.4232   1
   1  -2 -12 76.7937 23.1976   2
  -1   2 -12 104.079 36.9855   2
   1  -2 -12 72.0418 28.1827   5
  -1   2 -13 2339.63 164.712   2
   1  -2 -13 2396.75 218.210   1
   1  -2 -13 2031.87 133.434   2
   1  -2 -13 2199.74 145.914   5
   1  -2 -13 2081.82 142.229   3
  -1   2 -14 19915.1 484.203   2
   1  -2 -14 19025.4 419.806   2
   1  -2 -14 20347.8 645.335   1
   1  -2 -14 18139.8 436.436   5
   1  -2 -14 18490.5 417.682   3
  -1   2 -15 31530.8 628.169   2
   1  -2 -15 29925.4 539.174   2
   1  -2 -15 31479.7 827.569   1
   1  -2 -15 29604.1 581.226   5
   1  -2 -15 30420.3 526.043   3
  -1   2 -16 1077.44 126.534   2
   1  -2 -16 853.243 150.656   1
   1  -2 -16 867.864 97.1443   2
   1  -2 -16 680.064 92.5570   5
   1  -2 -16 645.396 76.1278   3
  -1   2 -17 4348.18 256.043   2
   1  -2 -17 3861.85 204.831   2
   1  -2 -17 3960.72 311.328   1
   1  -2 -17 3989.48 227.535   5
   1  -2 -17 3869.80 179.811   3
   1  -2 -18 287.407 55.2340   2
  -1   2 -18 430.497 88.0831   2
   1  -2 -18 345.804 106.610   1
   1  -2 -18 367.212 74.2879   5
  -1   2 -19 1204.04 142.240   2
   1  -2 -19 1032.59 110.826   2
   1  -2 -19 988.381 122.101   5
  -1   2 -20 150.851 60.8493   2
   1  -2 -20 105.961 37.2682   2
   1  -2 -20 113.480 52.3362   5
  -1   2 -21 2497.36 229.575   2
   1   2  21 1898.66 160.820   2
   1  -2 -21 1784.77 154.249   2
   1  -2 -21 2055.29 187.115   5
  -1   2 -22 298.715 91.2925   2
   1   2  22 190.489 60.2320   2
   1  -2 -22 205.306 52.1938   2
   1  -2 -22 266.902 104.454   4
   1  -2 -22 191.306 64.1115   5
  -1   2 -23 5403.77 365.595   2
   1  -2 -23 4106.65 242.653   2
   1   2  23 4259.81 250.244   2
   1  -2 -23 4230.31 283.225   5
   1  -2 -23 4860.85 352.867   4
  -1   2 -24 1250.43 181.558   2
   1   2  24 1054.61 130.279   2
   1  -2 -24 1094.39 129.582   2
   1  -2 -24 984.563 144.466   5
   1  -2 -24 1516.53 201.064   4
  -1   2 -25 3469.86 294.643   2
   1   2  25 2633.59 204.725   2
   1  -2 -25 2654.21 241.572   5
   1  -2 -25 3414.14 294.462   4
   1   2  26 922.758 123.095   2
   1  -2 -26 1016.68 151.968   5
   1  -2 -26 1223.36 183.430   4
   1   2  27 139.986 53.0885   2
   1  -2 -27 218.178 84.3123   4
   1  -2 -27 226.296 78.8477   5
   1   2  28 1534.03 168.419   2
   1  -2 -28 1481.83 191.187   5
   1  -2 -28 1713.21 220.907   4
   1   2  29 1636.09 175.307   2
   1  -2 -29 1496.01 195.277   5
   1  -2 -29 1856.82 226.902   4
   1   2  30 259.488 83.8322   2
   1  -2 -30 336.036 115.130   4
   1  -2 -30 112.935 61.4276   5
   1   2  31 3034.75 250.605   2
   1  -2 -31 3278.34 299.542   5
   1  -2 -31 3054.20 300.341   4
   1   2  32 1022.39 148.786   2
   1  -2 -32 1135.22 190.377   4
   1  -2 -32 1191.80 183.860   5
   1   2  33 232.290 80.1083   2
   1  -2 -33 87.9414 61.0330   5
   1  -2 -33 153.148 82.3555   4
   1  -2 -34 35.8405 44.2191   5
   1  -2 -34 45.1716 37.3539   4
   1   2  35 799.740 143.206   2
   1  -2 -35 624.925 146.153   4
   1   2  36 129.180 76.5626   2
   1  -2 -36-21.3278 41.2350   4
   1   2  37 544.927 126.084   2
   1  -2 -37 306.441 111.684   4
   1   2  38 55.1728 51.3842   2
   1  -2 -38 106.205 87.4737   4
   1   2  39 837.242 159.865   2
   1  -2 -39 684.746 176.784   4
   1   2  40 295.858 100.453   2
   1  -2 -40 267.303 105.973   4
   1   2  41 153.339 105.075   2
   1  -2 -41 187.609 103.680   4
   1   2  42 440.296 130.267   2
   1  -2 -42 533.221 162.609   4
   1   3 -46-97.1649 88.5721   4
   1   3 -45-51.7413 72.0422   4
   1   3 -44 99.8714 70.6778   4
   1  -3  43-54.6179 98.2191   2
   1   3 -43-60.1931 67.8427   4
   1  -3  42 91.4661 81.3658   2
   1   3 -42 187.217 119.098   4
   1  -3  41-27.5939 54.3205   2
   1   3 -41 100.076 87.3084   4
   1  -3  40 767.038 158.521   2
   1   3 -40 824.619 180.753   4
   1  -3  39 173.103 83.4093   2
   1   3 -39 104.429 83.7767   4
   1  -3  38 153.661 72.6693   2
   1   3 -38 136.802 83.3529   4
   1  -3  37 320.665 113.626   2
   1   3 -37 177.591 86.7729   4
   1  -3  36 1451.25 192.925   2
   1   3 -36 1194.98 192.536   4
   1  -3  35 134.290 66.3872   2
   1   3 -35 190.508 82.2253   4
   1  -3  34 488.862 114.632   2
   1   3 -34 491.037 126.647   4
   1  -3  33 743.165 130.195   2
   1  -3  33 798.931 127.585   3
   1   3 -33 692.563 143.605   4
   1  -3  32 592.460 118.425   2
   1  -3  32 435.098 93.2658   3
   1   3 -32 516.572 123.655   4
   1  -3  31 2097.37 205.787   2
   1  -3  31 2040.63 198.793   3
   1   3 -31 1828.02 219.027   4
   1  -3  30 1695.62 182.665   2
   1  -3  30 1650.31 176.496   3
   1   3 -30 1708.84 212.868   4
   1  -3  29 283.178 76.7726   2
   1  -3  29 288.302 73.2789   3
   1   3 -29 184.686 77.7582   4
   1  -3  28 585.561 103.220   2
   1  -3  28 503.753 97.9731   3
   1   3 -28 818.481 142.860   4
   1  -3  27 1170.80 137.682   2
   1  -3  27 1256.35 148.097   3
   1   3 -27 1238.31 167.727   4
   1  -3  26 41.9669 49.2348   2
   1  -3  26 11.7996 24.5470   3
   1   3 -26 102.881 60.1677   4
   1  -3  25 1225.38 136.010   2
  -1  -3 -25 1448.60 244.700   1
  -1   3  25 1621.21 207.574   2
   1  -3  25 1219.80 141.972   3
   1   3 -25 1408.02 146.662   2
  -1  -3 -25 1425.94 220.171   5
   1   3 -25 1341.28 173.409   4
   1  -3  24 3142.19 224.005   3
   1  -3  24 3336.10 215.665   2
  -1  -3 -24 3556.05 364.315   1
   1   3 -24 2893.51 201.958   2
  -1   3  24 4162.61 331.691   2
  -1  -3 -24 3541.93 332.410   5
   1   3 -24 3176.13 248.057   4
  -1  -3 -23 966.247 190.004   1
  -1  -3 -23 872.448 138.981   2
   1  -3  23 809.909 108.748   2
   1   3 -23 750.316 102.776   2
  -1   3  23 1411.05 202.516   2
   1  -3  23 836.293 117.451   3
  -1  -3 -23 985.976 174.454   5
   1   3 -23 980.731 141.213   4
  -1   3  22 1171.29 179.600   2
  -1  -3 -22 881.091 138.375   2
  -1  -3 -22 784.630 164.626   1
   1  -3  22 801.661 101.312   2
   1   3 -22 709.115 97.5214   2
   1  -3  22 778.297 109.133   3
  -1  -3 -22 674.606 148.692   5
  -1   3  21 19.5743 56.0611   2
  -1  -3 -21 5.91422 45.5843   1
  -1  -3 -21 35.4354 39.9338   2
   1   3 -21 92.8106 35.4369   2
   1  -3  21 123.848 48.1543   2
   1  -3  21 103.505 41.7114   3
  -1  -3 -21 44.2361 27.2480   5
  -1  -3 -20 1298.95 161.765   2
   1  -3  20 1470.32 148.107   3
  -1   3  20 1687.27 194.922   2
  -1  -3 -20 1311.44 206.804   1
   1  -3  20 1406.67 124.198   2
   1   3 -20 1225.02 122.075   2
  -1  -3 -20 1612.29 209.999   5
   1   3 -19 628.118 84.7652   2
  -1  -3 -19 530.065 134.140   1
  -1   3  19 957.217 148.506   2
  -1  -3 -19 586.831 104.832   2
   1  -3  19 526.145 79.3234   2
  -1   3  19 643.500 60.6336   3
   1  -3  19 574.318 91.8427   3
  -1  -3 -19 628.815 132.359   5
  -1  -3 -19 491.297 39.5610   3
   1  -3  18 6100.28 290.239   3
  -1  -3 -18 6117.38 334.846   2
  -1   3  18 5908.74 183.940   3
   1  -3  18 5793.29 238.594   2
   1   3 -18 5756.89 252.078   2
  -1  -3 -18 6105.01 420.442   1
  -1  -3 -18 6263.10 395.769   5
   1   3 -18 6002.02 337.808   5
   1   3 -18 6158.53 304.108   4
  -1  -3 -18 6006.66 168.969   3
   1  -3  17 1619.42 125.677   2
  -1   3  17 1617.57 100.708   3
   1  -3  17 1448.54 142.886   3
   1   3 -17 1378.14 123.160   2
  -1  -3 -17 1547.83 211.248   1
   1   3 -17 1413.43 169.258   5
  -1  -3 -17 1332.97 180.734   5
   1   3 -17 1407.26 143.491   4
  -1  -3 -17 1283.46 87.9088   3
  -1   3  16 6054.90 194.735   3
   1  -3  16 6077.10 232.478   2
   1  -3  16 6283.87 288.184   3
   1   3 -16 5761.67 245.550   2
   1   3 -16 6130.12 325.618   5
  -1  -3 -16 6437.58 388.447   5
   1   3 -16 6235.72 293.600   4
  -1  -3 -16 5886.69 199.847   3
   1  -3  15 1833.48 123.373   2
  -1   3  15 1921.73 113.840   3
   1  -3  15 2008.50 161.906   3
   1   3 -15 1847.80 135.618   2
   1   3 -15 1798.62 181.534   5
  -1  -3 -15 1735.98 202.125   5
  -1  -3 -15 1869.33 116.262   3
   1   3 -15 1912.99 158.433   4
   1  -3  14 1431.67 105.542   2
  -1   3  14 1455.33 99.8533   3
   1  -3  14 1536.16 141.075   3
   1   3 -14 1364.33 116.729   2
   1   3 -14 1575.76 161.963   5
  -1  -3 -14 1553.20 187.440   5
  -1  -3 -14 1263.62 99.9250   3
   1   3 -14 1339.13 129.427   4
  -1   3  13 2514.30 132.804   3
   1  -3  13 2550.43 182.969   3
   1  -3  13 2101.41 123.958   2
   1   3 -13 2011.31 143.376   2
   1   3 -13 2123.83 183.146   5
  -1  -3 -13 2282.73 215.382   5
  -1  -3 -13 2341.33 138.341   3
   1   3 -13 2199.82 162.159   4
   1  -3  12 12925.6 402.185   3
   1  -3  12 11452.8 276.902   2
  -1   3  12 10640.3 273.683   3
   1   3 -12 11560.8 329.307   2
   1   3 -12 12063.8 423.986   5
  -1   3  12 11234.8 371.705   5
  -1  -3 -12 11143.8 465.165   5
   1   3 -12 11620.2 360.522   4
   1  -3  11 17681.0 464.744   3
   1  -3  11 16146.2 320.161   2
  -1   3  11 15285.5 332.354   3
   1   3 -11 16112.3 380.862   2
  -1   3  11 14822.1 417.526   5
  -1  -3 -11 15012.2 529.662   5
   1   3 -11 17333.3 497.547   5
   1   3 -11 16530.3 419.953   4
   1  -3  10 22654.5 368.799   2
   1  -3  10 24164.6 538.947   3
  -1   3  10 23440.1 412.978   3
   1   3 -10 22679.5 449.995   2
   1   3 -10 23761.7 574.291   5
  -1  -3 -10 24065.7 647.305   5
  -1   3  10 23005.5 506.551   5
   1   3 -10 23477.1 486.029   4
  -1   3   9 3860.27 172.646   3
   1  -3   9 3743.56 146.626   2
   1  -3   9 4141.14 220.928   3
  -1  -3  -9 3568.87 247.997   5
  -1   3   9 3549.89 195.294   5
   1   3  -9 3627.96 220.716   5
   1  -3   8 984.610 72.3505   2
  -1   3   8 1217.77 101.518   3
   1  -3   8 1185.95 119.273   3
  -1   3   8 1081.48 106.305   5
   1   3  -8 1054.49 119.384   5
  -1  -3  -8 1148.84 140.754   5
  -1   3   7 12977.5 313.676   3
   1  -3   7 13159.7 260.412   2
   1  -3   7 13170.4 377.379   3
   1   3  -7 13820.2 416.921   5
  -1   3   7 12786.3 361.555   5
  -1  -3  -7 12780.6 443.975   5
   1  -3   6 543.672 84.9470   3
  -1   3   6 579.288 76.4343   3
   1  -3   6 459.913 48.0512   2
   1   3  -6 476.205 82.6055   5
  -1   3   6 454.461 67.9480   5
  -1  -3  -6 537.811 94.5208   5
   1  -3   5 1947.68 96.9247   2
  -1   3   5 1804.67 119.130   3
   1  -3   5 1959.51 143.058   3
  -1  -3  -5 1779.21 159.443   5
  -1   3   5 1715.50 133.555   5
   1   3  -5 1960.90 157.989   5
  -1   3   4 2794.25 151.137   3
   1  -3   4 2597.24 166.229   3
  -1   3   4 2707.47 163.934   5
   1   3  -4 2787.56 186.427   5
  -1  -3  -4 2676.43 191.012   5
  -1   3   4 2829.94 142.833   4
   1  -3   3 9187.93 306.871   3
  -1   3   3 9270.44 268.964   3
  -1  -3  -3 9205.28 350.670   5
   1   3  -3 10063.8 350.226   5
  -1   3   3 9053.58 303.397   5
  -1   3   3 9170.54 254.678   4
  -1   3   2 5073.69 201.115   3
   1  -3   2 5051.09 229.546   3
  -1   3   2 4978.51 227.124   5
   1   3  -2 5321.10 256.883   5
  -1  -3  -2 5343.84 259.609   5
  -1   3   2 5117.19 188.082   4
   1  -3   1 6330.65 255.257   3
  -1   3   1 6433.41 229.107   3
  -1   3   1 6184.60 257.771   5
  -1  -3  -1 6031.44 271.494   5
   1   3  -1 6578.18 287.903   5
  -1   3   1 6227.75 205.254   4
   1  -3   0 17368.5 420.152   3
  -1   3   0 17130.1 370.399   3
  -1   3   0 16997.2 433.525   5
   1   3   0 18290.1 482.868   5
  -1  -3   0 17507.3 456.375   5
  -1   3   0 17456.0 340.576   4
   1  -3  -1 6167.43 251.605   3
  -1   3  -1 6444.57 268.554   5
   1  -3  -1 6066.15 258.330   5
  -1  -3   1 6602.27 281.036   5
   1   3   1 6653.26 293.563   5
  -1   3  -1 6099.95 203.549   4
   1  -3  -2 5159.01 231.967   3
   1  -3  -2 5207.88 234.512   5
  -1  -3   2 5001.94 241.740   5
   1   3   2 5332.73 267.728   5
  -1   3  -2 4786.08 244.094   5
  -1   3  -2 5083.38 186.901   4
   1  -3  -2 5104.74 211.012   4
   1  -3  -3 9012.93 307.307   3
  -1  -3   3 9276.43 330.477   5
   1  -3  -3 9056.90 303.704   5
  -1   3  -3 9101.17 337.439   5
   1  -3  -3 8782.84 285.407   4
   1  -3  -4 2655.25 168.056   3
  -1  -3   4 2550.01 172.779   5
   1  -3  -4 2607.44 159.681   5
   1  -3  -4 2914.71 166.167   4
   1  -3  -5 1883.15 142.019   3
   1  -3  -5 1888.74 101.489   2
  -1  -3   5 1959.61 154.883   5
   1  -3  -5 1855.60 136.101   5
  -1  -3   5 1888.39 120.671   4
   1  -3  -5 1817.47 135.408   4
   1  -3  -6 633.770 83.4415   3
   1  -3  -6 514.016 54.8199   2
   1  -3  -6 410.837 64.9436   5
  -1  -3   6 444.547 74.2646   5
  -1  -3   6 484.388 59.1070   4
   1  -3  -6 581.167 76.3624   4
   1  -3  -7 12758.0 372.396   3
   1   3   7 12804.1 337.931   2
   1  -3  -7 12645.4 274.622   2
  -1  -3   7 12452.6 397.198   5
   1  -3  -7 12750.3 354.450   5
  -1  -3   7 12138.8 289.995   4
   1  -3  -7 12992.9 372.231   4
   1  -3  -8 982.039 104.755   3
   1   3   8 954.022 94.6156   2
   1  -3  -8 1023.64 80.9393   2
  -1  -3   8 962.219 111.530   5
   1  -3  -8 947.694 96.2054   5
   1  -3  -8 953.228 106.086   4
  -1  -3   8 786.837 73.9291   4
   1  -3  -9 3640.62 201.690   3
   1   3   9 3723.69 187.428   2
   1  -3  -9 3587.94 154.252   2
   1  -3  -9 3504.50 189.801   5
   1  -3  -9 3967.03 217.562   4
  -1  -3   9 3433.53 153.830   4
   1   3  10 24420.1 486.916   2
   1  -3 -10 23528.4 510.297   3
   1  -3 -10 23240.7 404.679   2
   1  -3 -10 23949.3 503.726   5
  -1  -3  10 22651.0 391.962   4
   1  -3 -10 24064.5 540.408   4
   1  -3 -11 14736.5 402.040   3
   1   3  11 15478.5 394.647   2
   1  -3 -11 14803.7 334.583   2
   1  -3 -11 15007.3 564.981   1
   1  -3 -11 14917.5 405.677   5
   1  -3 -11 15907.4 451.554   4
   1   3  12 11050.3 337.861   2
   1  -3 -12 10556.7 290.513   2
   1  -3 -12 10806.6 488.763   1
   1  -3 -12 10461.5 350.401   5
   1  -3 -12 10664.6 344.636   3
   1  -3 -12 11762.0 399.946   4
  -1   3 -13 2140.07 152.973   2
   1   3  13 2087.06 148.456   2
   1  -3 -13 2165.70 226.479   1
   1  -3 -13 2168.92 135.806   2
   1  -3 -13 2242.86 165.951   5
   1  -3 -13 2249.67 158.628   3
  -1   3 -14 1450.21 129.369   2
   1  -3 -14 1472.06 115.236   2
   1  -3 -14 1303.82 178.676   1
   1  -3 -14 1503.28 137.222   5
   1  -3 -14 1411.18 125.091   3
  -1   3 -15 2026.90 158.992   2
   1  -3 -15 1970.95 139.349   2
   1  -3 -15 1840.68 213.263   1
   1  -3 -15 1741.19 152.942   5
   1  -3 -15 1732.65 136.731   3
  -1   3 -16 6569.63 295.575   2
   1  -3 -16 5792.08 242.108   2
   1  -3 -16 6458.36 408.946   1
   1  -3 -16 5962.59 291.016   5
   1  -3 -16 5748.52 249.120   3
  -1   3 -17 1654.70 152.993   2
   1  -3 -17 1386.71 197.700   1
   1  -3 -17 1549.06 130.822   2
   1  -3 -17 1482.52 148.549   5
   1  -3 -17 1243.37 114.350   3
  -1   3 -18 6354.43 313.681   2
   1  -3 -18 5924.22 261.842   2
   1   3  18 5939.53 270.653   2
   1  -3 -18 5601.25 399.736   1
   1  -3 -18 5769.79 303.353   5
   1  -3 -18 6079.78 246.671   3
   1  -3 -19 730.171 95.0779   2
   1  -3 -19 592.036 141.590   1
  -1   3 -19 908.763 124.289   2
   1   3  19 578.367 87.3086   2
   1  -3 -19 643.175 106.707   5
   1  -3 -19 648.427 76.8756   3
   1  -3 -20 1294.04 128.757   2
   1   3  20 1347.45 133.134   2
  -1   3 -20 1553.40 167.104   2
   1  -3 -20 1411.90 206.810   1
   1  -3 -20 1271.01 148.449   5
   1  -3 -20 1812.38 210.923   4
   1  -3 -20 1380.09 110.999   3
   1  -3 -21 0.96817 58.8572   1
  -1   3 -21 134.684 50.9655   2
   1   3  21 59.4520 37.9630   2
   1  -3 -21 84.9443 39.2515   2
   1  -3 -21 68.8636 34.7798   5
   1  -3 -21 91.4732 67.4856   4
   1  -3 -22 941.008 116.144   2
  -1   3 -22 1124.93 153.180   2
   1  -3 -22 851.079 176.007   1
   1   3  22 818.802 111.886   2
   1  -3 -22 892.678 135.828   5
   1  -3 -22 1406.58 206.619   4
   1  -3 -23 808.031 110.744   2
   1  -3 -23 827.669 178.653   1
  -1   3 -23 928.153 143.446   2
   1   3  23 897.639 117.559   2
   1  -3 -23 925.627 137.613   5
   1  -3 -23 1294.55 202.818   4
  -1   3 -24 3917.39 295.802   2
   1  -3 -24 3044.07 215.441   2
   1   3  24 3425.84 230.612   2
   1  -3 -24 3033.26 255.636   5
   1  -3 -24 4452.26 351.144   4
  -1   3 -25 1623.81 194.272   2
   1   3  25 1375.76 150.528   2
   1  -3 -25 1556.39 186.647   5
   1  -3 -25 1999.16 235.963   4
  -1   3 -26 149.617 67.7316   2
   1   3  26 136.027 55.4770   2
   1  -3 -26 120.119 61.4895   5
   1  -3 -26 183.102 80.3692   4
   1   3  27 1067.45 140.178   2
   1  -3 -27 1258.92 173.861   5
   1  -3 -27 1223.59 189.361   4
   1   3  28 442.085 95.3209   2
   1  -3 -28 528.155 108.913   5
   1  -3 -28 603.922 133.281   4
   1   3  29 240.469 78.5525   2
   1  -3 -29 188.840 84.9155   5
   1  -3 -29 291.648 106.765   4
   1   3  30 1452.42 174.290   2
   1  -3 -30 1426.59 194.860   5
   1  -3 -30 2089.35 244.265   4
   1   3  31 2006.51 207.959   2
   1  -3 -31 2280.21 253.060   5
   1  -3 -31 2194.79 259.149   4
   1   3  32 798.706 137.671   2
   1  -3 -32 641.422 139.032   5
   1  -3 -32 784.041 166.294   4
   1   3  33 733.363 142.816   2
   1  -3 -33 604.634 143.129   5
   1  -3 -33 621.105 141.177   4
   1   3  34 505.217 107.991   2
   1  -3 -34 448.648 127.818   4
   1   3  35 74.8117 47.4703   2
   1  -3 -35 17.5091 57.4604   4
   1   3  36 1459.80 196.148   2
   1  -3 -36 1447.62 225.587   4
   1   3  37 276.063 98.6724   2
   1  -3 -37 257.372 99.4607   4
   1   3  38 31.9860 34.9086   2
   1  -3 -38 93.8775 79.3769   4
   1   3  39 130.283 79.7783   2
   1  -3 -39 26.6381 37.7710   4
   1   3  40 559.549 135.844   2
   1  -3 -40 623.328 165.394   4
   1   3  41 27.6140 48.7514   2
   1  -3 -41 109.899 78.5513   4
   1   4 -45 41.1028 103.405   4
   1   4 -44 21.1390 71.7909   4
   1   4 -43-13.7167 72.8139   5
   1   4 -43 19.4586 55.2470   4
   1  -4  42 387.367 138.753   2
   1   4 -42 384.094 141.155   5
   1   4 -42 430.114 143.076   4
   1  -4  41-26.3227 41.0889   2
   1   4 -41 182.342 106.478   5
   1   4 -41 83.6408 80.4198   4
   1  -4  40-72.9130 70.5564   2
   1   4 -40 21.8160 82.6366   5
   1   4 -40 68.4874 80.6105   4
   1  -4  39-122.879 75.5664   2
   1   4 -39-5.51965 66.2749   5
   1   4 -39-8.51093 44.3030   4
   1  -4  38 397.879 114.023   2
   1   4 -38 271.357 110.177   5
   1   4 -38 158.100 84.0056   4
   1  -4  37 1270.76 187.429   2
   1   4 -37 1230.44 231.499   5
   1   4 -37 1070.44 195.194   4
   1  -4  36 842.947 157.991   2
   1   4 -36 650.033 156.871   4
   1  -4  35 307.080 92.9274   2
   1   4 -35 286.099 105.680   4
   1  -4  34 292.203 84.5138   2
   1   4 -34 299.307 100.895   4
   1  -4  33 444.589 104.593   2
   1  -4  33 310.408 91.3380   3
   1   4 -33 350.444 107.918   4
   1  -4  32 1045.79 152.787   2
   1  -4  32 835.089 140.544   3
   1   4 -32 1000.28 170.732   4
   1  -4  31 1259.65 168.560   3
   1  -4  31 1457.54 175.132   2
   1   4 -31 1321.12 223.571   5
   1   4 -31 1555.84 205.473   4
   1  -4  30 1094.66 155.240   3
   1  -4  30 1121.59 149.753   2
   1   4 -30 1140.97 198.693   5
   1   4 -30 1281.95 186.614   4
   1  -4  29 334.671 94.9284   3
  -1  -4 -29 213.116 113.155   1
   1  -4  29 310.957 83.5369   2
   1   4 -29 317.472 105.745   5
   1   4 -29 375.342 101.620   4
   1  -4  28 1766.74 187.044   3
   1  -4  28 1838.81 180.937   2
  -1  -4 -28 1512.93 259.998   1
   1   4 -28 2119.28 261.818   5
   1   4 -28 1567.82 195.046   4
   1  -4  27 938.286 136.425   3
   1  -4  27 913.477 128.482   2
  -1  -4 -27 944.002 215.612   1
   1   4 -27 1012.49 181.155   5
   1   4 -27 839.004 138.905   4
   1  -4  26 1091.22 146.014   3
   1  -4  26 1379.75 149.864   2
  -1  -4 -26 1369.74 245.208   1
   1   4 -26 987.398 169.153   5
   1   4 -26 1167.24 159.260   4
   1  -4  25 273.919 72.6304   3
  -1  -4 -25 345.839 125.119   1
   1  -4  25 397.828 85.2202   2
   1   4 -25 386.077 75.7106   2
   1   4 -25 236.105 95.7518   5
   1   4 -25 346.836 97.9245   4
   1   4 -24 2409.94 183.925   2
   1  -4  24 2490.67 213.563   3
   1  -4  24 2436.43 186.008   2
  -1  -4 -24 2472.92 316.822   1
   1   4 -24 2733.89 269.161   5
   1   4 -24 2536.77 225.210   4
   1  -4  23 695.667 112.585   3
  -1  -4 -23 740.641 174.516   1
   1  -4  23 742.258 101.429   2
   1   4 -23 569.612 89.0937   2
   1   4 -23 722.669 152.929   5
  -1  -4 -23 794.953 162.898   5
   1  -4  22 1457.34 162.247   3
   1  -4  22 1501.24 136.728   2
  -1  -4 -22 1728.20 255.377   1
   1   4 -22 1246.05 129.123   2
  -1  -4 -22 1325.75 210.600   5
   1   4 -22 1604.99 206.952   5
  -1  -4 -21 39.3377 16.2978   3
  -1  -4 -21 71.9290 15.8621   3
   1  -4  21 115.802 51.1052   3
   1  -4  21 132.362 49.8405   2
   1   4 -21 76.5276 25.3147   2
  -1  -4 -21 2.20107 58.2283   1
   1   4 -21 78.9988 60.8428   5
  -1  -4 -21 128.290 78.1976   5
   1  -4  20 3681.58 249.759   3
   1  -4  20 3354.25 191.617   2
   1   4 -20 3231.29 195.011   2
  -1  -4 -20 3333.33 341.958   1
   1   4 -20 3727.99 296.312   5
  -1  -4 -20 3553.62 324.719   5
   1   4 -20 3589.01 244.090   4
  -1  -4 -20 3342.51 143.850   3
   1  -4  19 1012.02 131.277   3
   1   4 -19 911.862 104.216   2
  -1  -4 -19 926.977 184.695   1
   1  -4  19 925.549 101.169   2
   1   4 -19 1026.50 161.821   5
  -1  -4 -19 1133.40 180.911   5
   1   4 -19 978.283 124.921   4
  -1  -4 -19 943.649 85.5855   3
   1  -4  18 1264.44 146.908   3
   1  -4  18 1306.33 113.772   2
   1   4 -18 1270.27 119.228   2
  -1  -4 -18 1306.87 208.852   1
   1   4 -18 1355.59 178.816   5
  -1  -4 -18 1247.28 184.503   5
  -1  -4 -18 1144.72 97.6369   3
   1   4 -18 1304.70 143.027   4
   1  -4  17 2715.49 212.309   3
   1   4 -17 2301.66 156.165   2
   1  -4  17 2508.84 151.793   2
  -1  -4 -17 2257.01 267.401   1
   1   4 -17 2531.33 239.394   5
  -1  -4 -17 2595.51 260.735   5
  -1  -4 -17 2504.81 149.980   3
   1   4 -17 2500.52 189.373   4
   1  -4  16 2154.17 188.107   3
   1  -4  16 1889.89 129.025   2
   1   4 -16 1868.47 137.704   2
  -1  -4 -16 1901.07 242.685   1
  -1  -4 -16 2346.63 244.122   5
   1   4 -16 1989.51 203.820   5
   1   4 -16 2021.09 164.965   4
   1  -4  15 5346.05 294.480   3
   1   4 -15 4549.67 213.201   2
  -1  -4 -15 4521.43 370.879   1
   1  -4  15 4641.39 193.256   2
   1   4 -15 4734.06 315.654   5
  -1  -4 -15 4382.76 323.957   5
  -1   4  15 4993.02 298.146   5
   1   4 -15 4735.69 245.609   4
   1  -4  14 7609.13 352.115   3
   1   4 -14 6258.24 244.890   2
   1  -4  14 6410.17 219.323   2
  -1   4  14 6640.11 337.633   5
   1   4 -14 7018.72 371.400   5
  -1  -4 -14 7463.73 418.739   5
   1   4 -14 6682.27 284.890   4
   1  -4  13 8577.27 374.116   3
   1  -4  13 7277.42 221.093   2
   1   4 -13 6946.06 254.891   2
  -1  -4 -13 7947.72 423.311   5
  -1   4  13 8049.20 362.314   5
   1   4 -13 7325.79 374.475   5
   1   4 -13 7212.32 287.691   4
   1  -4  12 3384.71 232.470   3
   1  -4  12 2892.85 136.630   2
   1   4 -12 2894.98 233.206   5
  -1   4  12 2978.36 216.115   5
  -1  -4 -12 3186.63 264.106   5
   1   4 -12 2612.58 155.279   2
   1  -4  11 1217.34 142.618   3
   1  -4  11 1126.71 81.0499   2
  -1  -4 -11 1032.00 154.223   5
  -1   4  11 982.555 124.239   5
   1   4 -11 1143.67 146.544   5
   1   4 -11 1047.72 95.7969   2
   1  -4  10 2706.95 118.892   2
   1  -4  10 3316.40 227.270   3
  -1  -4 -10 2680.58 233.214   5
   1   4 -10 3075.71 233.537   5
  -1   4  10 2828.30 206.208   5
   1   4 -10 2809.05 155.939   2
   1  -4   9 6352.14 307.468   3
   1  -4   9 5230.79 155.410   2
  -1  -4  -9 4931.95 311.684   5
   1   4  -9 5448.77 307.132   5
  -1   4   9 5095.44 271.640   5
   1  -4   8 7378.48 325.517   3
   1  -4   8 6309.97 164.928   2
  -1   4   8 6399.22 303.341   5
   1   4  -8 6823.25 339.855   5
  -1  -4  -8 6155.27 342.121   5
   1  -4   7 3457.00 116.899   2
   1  -4   7 3718.43 228.834   3
  -1   4   7 3400.17 218.911   5
   1   4  -7 3546.78 243.494   5
  -1  -4  -7 3299.46 246.422   5
   1  -4   6 329.472 72.4155   3
  -1  -4  -6 276.166 70.7726   5
   1   4  -6 260.531 64.4269   5
  -1   4   6 250.304 58.4284   5
   1  -4   6 242.909 30.9653   2
   1  -4   5 6886.46 296.712   3
   1  -4   5 6663.57 148.474   2
  -1   4   5 6527.90 301.038   5
   1   4  -5 6561.73 323.971   5
  -1  -4  -5 6201.15 329.036   5
   1  -4   4 12380.2 395.930   3
   1  -4   4 12049.6 196.930   2
  -1   4   4 12375.9 413.309   5
   1   4  -4 12421.6 448.157   5
  -1  -4  -4 12361.7 460.115   5
   1  -4   3 9308.55 337.039   3
  -1  -4  -3 9714.88 400.926   5
   1   4  -3 9844.30 399.418   5
  -1   4   3 9413.61 363.419   5
   1  -4   2 587.025 90.6985   3
  -1   4   2 505.791 84.4865   5
  -1  -4  -2 497.861 87.8468   5
   1  -4   1 5217.80 247.274   3
  -1  -4  -1 5583.32 296.471   5
  -1   4   1 5146.40 269.667   5
  -1   4   1 5240.08 180.073   4
   1  -4   0 145.603 47.8317   3
  -1  -4   0 205.046 64.4277   5
   1  -4   0 243.420 64.5613   5
  -1   4   0 255.586 68.3642   5
  -1   4   0 212.748 36.7162   4
   1  -4  -1 5209.32 246.443   3
  -1  -4   1 4906.11 275.857   5
  -1   4  -1 5015.84 272.743   5
   1  -4  -1 5200.38 275.783   5
  -1   4  -1 5115.00 174.018   4
   1  -4  -2 415.531 71.0434   3
   1  -4  -2 473.603 41.5518   2
   1  -4  -2 456.976 82.8310   5
  -1  -4   2 555.966 97.4562   5
  -1   4  -2 608.590 99.7977   5
  -1   4  -2 585.084 58.0680   4
   1  -4  -2 453.443 68.8352   4
   1  -4  -3 9463.20 335.673   3
   1  -4  -3 9711.47 192.098   2
  -1   4  -3 9118.02 377.715   5
   1  -4  -3 9895.84 369.525   5
  -1  -4   3 9585.79 384.405   5
  -1   4  -3 8920.85 229.902   4
   1  -4  -3 10079.2 312.837   4
   1  -4  -4 12706.2 390.474   3
   1  -4  -4 12222.1 223.314   2
  -1  -4   4 11464.2 423.204   5
   1  -4  -4 12440.0 414.771   5
   1  -4  -4 12933.2 364.292   4
  -1   4  -4 11458.2 264.949   4
   1  -4  -5 6454.15 281.511   3
   1  -4  -5 6475.17 169.904   2
  -1  -4   5 6423.66 318.953   5
   1  -4  -5 6453.63 297.861   5
   1  -4  -5 6944.89 274.385   4
   1  -4  -6 217.176 54.0486   3
   1  -4  -6 268.328 38.8671   2
   1   4   6 258.750 46.8935   2
  -1  -4   6 161.747 58.3282   5
   1  -4  -6 275.783 66.4724   5
  -1  -4   6 245.713 42.8955   4
   1  -4  -6 279.120 59.6319   4
   1   4   7 3459.37 174.545   2
   1  -4  -7 3663.76 215.373   3
   1  -4  -7 3530.93 137.757   2
  -1  -4   7 3363.39 235.398   5
   1  -4  -7 3552.31 219.606   5
  -1  -4   7 3179.12 142.962   4
   1  -4  -7 3730.86 206.919   4
   1  -4  -8 6785.76 293.596   3
   1   4   8 6656.36 247.673   2
   1  -4  -8 6358.27 193.215   2
   1  -4  -8 6071.19 288.777   5
  -1  -4   8 6228.31 327.376   5
  -1  -4   8 6002.36 193.251   4
   1  -4  -8 6761.94 284.418   4
   1  -4  -9 5167.35 257.940   3
   1   4   9 5032.95 217.812   2
   1  -4  -9 5133.64 181.462   2
   1  -4  -9 5028.25 263.355   5
  -1  -4   9 5603.18 310.094   5
  -1  -4   9 5211.30 178.073   4
   1  -4  -9 5351.29 258.255   4
   1  -4 -10 2788.83 190.496   3
   1   4  10 3014.00 171.871   2
   1  -4 -10 2691.04 137.498   2
   1  -4 -10 2867.62 201.320   5
   1  -4 -10 2705.67 190.293   4
   1  -4 -11 991.230 115.145   3
   1   4  11 983.671 98.5202   2
   1  -4 -11 991.119 86.5320   2
   1  -4 -11 1079.49 126.936   5
   1  -4 -11 1055.22 123.026   4
   1   4  12 3072.25 178.316   2
   1  -4 -12 3088.15 200.199   3
   1  -4 -12 2971.63 155.530   2
   1  -4 -12 3067.55 213.528   5
   1  -4 -12 3490.88 225.445   4
   1  -4 -13 7853.76 318.342   3
   1  -4 -13 7380.66 252.066   2
   1  -4 -13 7795.25 343.312   5
   1  -4 -13 7946.08 348.169   4
   1  -4 -14 6717.67 249.062   2
   1  -4 -14 6826.86 295.766   3
   1  -4 -14 6968.97 442.998   1
   1  -4 -14 6586.66 324.134   5
   1  -4 -14 7371.55 345.675   4
   1  -4 -15 4583.75 211.819   2
  -1   4 -15 4756.44 238.819   2
   1  -4 -15 4048.55 343.043   1
   1  -4 -15 4609.89 275.538   5
   1  -4 -15 5495.15 305.194   4
   1  -4 -15 4330.82 236.255   3
   1  -4 -16 2167.49 151.501   2
  -1   4 -16 2040.67 161.686   2
   1  -4 -16 1637.14 222.285   1
   1  -4 -16 1962.06 181.833   5
   1  -4 -16 2030.23 160.561   3
   1  -4 -16 2224.90 207.921   4
   1   4  17 2539.64 174.746   2
   1  -4 -17 2540.27 168.357   2
  -1   4 -17 2686.10 189.613   2
   1  -4 -17 2818.45 296.841   1
   1  -4 -17 2344.99 203.687   5
   1  -4 -17 3046.02 245.205   4
   1  -4 -17 2380.40 174.427   3
  -1   4 -18 1234.15 133.732   2
   1  -4 -18 1175.94 117.834   2
   1   4  18 1255.95 126.607   2
   1  -4 -18 1225.95 202.373   1
   1  -4 -18 1046.11 139.757   5
   1  -4 -18 1074.07 116.598   3
   1  -4 -18 1511.90 186.429   4
  -1   4 -19 1109.45 137.704   2
   1   4  19 939.311 116.799   2
   1  -4 -19 962.059 109.849   2
   1  -4 -19 918.280 176.258   1
   1  -4 -19 872.861 130.247   5
   1  -4 -19 1118.50 167.735   4
   1  -4 -19 801.242 97.8921   3
   1   4  20 3286.32 210.512   2
   1  -4 -20 3496.13 211.826   2
  -1   4 -20 3623.92 245.003   2
   1  -4 -20 3516.50 345.772   1
   1  -4 -20 3481.51 261.113   5
   1  -4 -20 3229.05 193.178   3
   1  -4 -20 4174.23 319.825   4
   1  -4 -21 134.074 79.0894   1
  -1   4 -21 135.989 58.7739   2
   1  -4 -21 82.0643 39.1319   2
   1   4  21 142.183 56.9127   2
   1  -4 -21 37.6033 29.5885   5
   1  -4 -21 210.082 86.7372   4
   1  -4 -21 95.8160 33.6288   3
   1  -4 -22 1330.44 139.022   2
  -1   4 -22 1624.82 178.326   2
   1   4  22 1482.39 151.430   2
   1  -4 -22 1615.30 246.018   1
   1  -4 -22 1400.78 171.761   5
   1  -4 -22 1936.40 233.386   4
   1  -4 -22 1476.20 121.471   3
   1  -4 -23 682.962 167.070   1
  -1   4 -23 935.837 139.522   2
   1  -4 -23 668.276 104.191   2
   1   4  23 734.939 113.202   2
   1  -4 -23 708.655 126.847   5
   1  -4 -23 603.193 72.2338   3
   1  -4 -23 1017.38 172.835   4
  -1   4 -24 2934.60 249.463   2
   1  -4 -24 2760.45 331.456   1
   1   4  24 2610.83 204.035   2
   1  -4 -24 2460.26 237.596   5
   1  -4 -24 3505.34 317.549   4
   1  -4 -25 359.464 132.383   1
  -1   4 -25 422.442 99.5416   2
   1   4  25 426.722 88.1521   2
   1  -4 -25 259.254 84.4971   5
   1  -4 -25 535.394 132.396   4
   1   4  26 1142.33 142.079   2
   1  -4 -26 1548.15 255.601   1
  -1   4 -26 1097.03 162.803   2
   1  -4 -26 982.095 158.837   5
   1  -4 -26 1336.87 202.779   4
   1  -4 -27 836.167 204.070   1
   1   4  27 892.713 130.000   2
   1  -4 -27 993.007 163.568   5
   1  -4 -27 899.809 175.641   4
   1   4  28 1556.71 173.714   2
   1  -4 -28 1905.17 224.137   5
   1  -4 -28 1954.38 241.252   4
   1   4  29 323.013 85.9727   2
   1  -4 -29 254.817 85.1103   5
   1  -4 -29 311.367 106.421   4
   1   4  30 1080.18 153.098   2
   1  -4 -30 1163.65 184.680   5
   1  -4 -30 1025.28 182.793   4
   1   4  31 1368.11 174.380   2
   1  -4 -31 978.515 174.798   5
   1  -4 -31 1284.57 215.456   4
   1   4  32 784.001 134.822   2
   1  -4 -32 789.407 162.182   5
   1  -4 -32 1133.81 187.999   4
   1   4  33 189.116 76.0508   2
   1  -4 -33 403.346 124.588   4
   1   4  34 531.756 114.820   2
   1  -4 -34 405.085 129.315   4
   1   4  35 457.884 112.672   2
   1  -4 -35 551.571 142.038   4
   1   4  36 884.668 163.795   2
   1  -4 -36 961.125 189.942   4
   1   4  37 1231.58 186.308   2
   1  -4 -37 1649.60 260.087   4
   1   4  38 321.934 100.539   2
   1  -4 -38 469.199 156.277   4
   1   4  39 120.915 68.2038   2
   1  -4 -39 136.547 75.9577   4
   1   4  40 28.2630 56.7458   2
   1  -4 -40-88.2332 67.1903   4
   1   5 -43-0.50260 77.1995   5
   1  -5  42-18.8374 79.2929   2
   1   5 -42 112.389 96.2673   5
   1   5 -42 12.3058 74.6424   4
   1  -5  41 88.4327 61.1105   2
   1   5 -41 208.863 133.793   5
   1   5 -41 5.94258 55.2049   4
   1  -5  40-28.4227 54.1992   2
   1   5 -40 68.2330 71.5518   5
   1   5 -40-15.6538 41.5951   4
   1  -5  39 94.9706 68.3213   2
   1   5 -39 67.4700 65.4232   5
   1   5 -39 61.8239 73.3524   4
   1  -5  38 474.402 127.854   2
   1   5 -38 211.256 111.797   5
   1   5 -38 243.442 108.147   4
   1  -5  37 893.965 165.017   2
   1   5 -37 926.821 211.818   5
   1   5 -37 1168.12 201.339   4
   1  -5  36 50.2541 60.6762   2
   1   5 -36 117.614 97.0281   5
   1   5 -36 187.090 80.8019   4
   1  -5  35 547.451 121.777   2
   1   5 -35 483.572 157.895   5
   1   5 -35 482.219 124.420   4
   1  -5  34-17.1591 35.3205   2
   1   5 -34 63.4067 84.0024   5
   1   5 -34 49.9804 35.2272   4
   1  -5  33 78.7082 35.7163   2
   1   5 -33 30.8420 48.3087   5
   1   5 -33 4.39335 49.2947   4
   1  -5  32 364.217 86.5637   2
  -1  -5 -32 465.777 173.097   1
   1   5 -32 627.918 162.017   5
   1   5 -32 415.809 108.919   4
   1  -5  31 188.621 73.3430   2
  -1  -5 -31 207.167 103.242   1
   1   5 -31 291.716 109.726   5
   1   5 -31 182.672 74.5221   4
  -1  -5 -30 768.806 210.973   1
   1  -5  30 593.217 115.520   2
   1   5 -30 764.943 165.412   5
   1   5 -30 749.005 145.794   4
   1  -5  29 481.550 102.821   2
  -1  -5 -29 681.405 194.551   1
   1   5 -29 635.618 157.256   5
   1   5 -29 564.560 124.023   4
   1  -5  28 260.808 82.4188   3
  -1  -5 -28 154.059 96.8754   1
   1  -5  28 245.660 73.7783   2
   1   5 -28 175.493 92.0088   5
   1   5 -28 240.561 75.6614   4
   1  -5  27 1477.21 182.396   3
   1  -5  27 1131.44 140.790   2
  -1  -5 -27 1449.87 272.817   1
   1   5 -27 1512.62 228.462   5
   1   5 -27 1373.58 174.254   4
   1  -5  26 1798.97 199.285   3
   1  -5  26 1966.63 178.053   2
  -1  -5 -26 2393.45 336.237   1
   1   5 -26 1702.63 241.491   5
   1   5 -26 1804.04 196.436   4
   1  -5  25 866.020 136.350   3
   1   5 -25 950.739 119.000   2
   1   5 -25 1118.71 193.503   5
  -1  -5 -25 1043.12 219.666   1
   1  -5  25 964.036 125.187   2
   1  -5  24 588.834 114.043   3
   1   5 -24 612.037 94.7852   2
  -1  -5 -24 407.094 139.138   1
   1  -5  24 679.062 103.556   2
   1   5 -24 747.869 158.960   5
  -1  -5 -23 2763.60 104.145   3
   1   5 -23 3509.32 214.572   2
   1  -5  23 3433.64 263.863   3
   1  -5  23 3532.79 217.720   2
  -1  -5 -23 3407.70 382.539   1
   1   5 -23 3589.79 332.769   5
  -1  -5 -23 3173.82 135.315   3
  -1  -5 -22 1011.96 70.6344   3
   1  -5  22 1484.37 173.467   3
   1  -5  22 1373.19 136.718   2
   1   5 -22 1298.67 131.571   2
  -1  -5 -22 1118.42 221.273   1
   1   5 -22 1347.67 205.548   5
  -1  -5 -22 1135.02 95.0837   3
   1  -5  21 3759.95 271.832   3
   1  -5  21 3412.74 202.882   2
   1   5 -21 2995.50 191.092   2
  -1  -5 -21 3666.02 388.413   1
   1   5 -21 3560.88 315.728   5
   1   5 -21 3329.53 239.841   4
  -1  -5 -21 3373.75 174.896   3
   1  -5  20 283.966 83.1895   3
   1  -5  20 307.297 65.8688   2
  -1  -5 -20 41.0207 52.3781   1
   1   5 -20 157.637 44.5872   2
  -1  -5 -20 239.264 97.1638   5
   1   5 -20 300.067 112.694   5
   1   5 -20 158.295 54.0324   4
  -1  -5 -20 222.235 48.9379   3
   1  -5  19 1975.20 197.386   3
  -1  -5 -19 1785.26 262.083   1
   1   5 -19 1600.08 132.764   2
   1  -5  19 1692.74 135.640   2
   1   5 -19 1928.75 225.692   5
  -1  -5 -19 1783.85 236.782   5
   1   5 -19 1645.98 159.400   4
   1  -5  18 1476.82 171.331   3
   1  -5  18 1384.96 118.754   2
  -1  -5 -18 1284.53 220.361   1
   1   5 -18 1373.37 121.419   2
   1   5 -18 1434.27 198.935   5
  -1  -5 -18 1480.94 211.706   5
   1   5 -18 1227.05 136.708   4
   1  -5  17 1271.02 161.411   3
   1   5 -17 955.452 101.491   2
   1  -5  17 1244.85 106.201   2
  -1  -5 -17 1043.71 194.994   1
  -1  -5 -17 1302.13 198.397   5
   1   5 -17 1109.58 177.295   5
   1   5 -17 940.745 116.734   4
   1  -5  16 1104.74 150.793   3
   1   5 -16 770.668 151.722   5
  -1  -5 -16 873.762 160.585   5
   1  -5  16 1116.12 97.6563   2
   1   5 -16 794.209 89.7629   2
   1  -5  15 3130.02 247.277   3
  -1  -5 -15 2818.85 277.087   5
   1   5 -15 2755.68 260.759   5
   1  -5  15 2478.18 140.951   2
   1   5 -15 2259.44 146.890   2
   1  -5  14 2463.77 225.754   3
   1   5 -14 2192.07 229.702   5
  -1  -5 -14 2115.66 238.635   5
   1   5 -14 1834.73 133.285   2
   1  -5  14 2052.95 121.635   2
   1  -5  13 11968.8 490.791   3
   1   5 -13 10323.0 486.021   5
  -1  -5 -13 10334.4 508.401   5
   1   5 -13 9258.18 287.633   2
   1  -5  13 9951.05 251.409   2
   1  -5  12 1787.78 191.133   3
   1   5 -12 1544.17 189.665   5
  -1  -5 -12 1505.19 198.804   5
   1   5 -12 1360.48 110.893   2
   1  -5  12 1493.76 97.1226   2
   1  -5  11 864.260 136.934   3
   1   5 -11 449.951 106.912   5
  -1  -5 -11 665.653 127.364   5
   1  -5  11 578.787 59.6010   2
   1   5 -11 503.706 65.0973   2
   1  -5  10 7404.42 381.917   3
  -1  -5 -10 5665.60 362.323   5
   1   5 -10 5966.93 362.813   5
  -1   5  10 5751.47 332.302   5
   1   5 -10 5502.79 216.162   2
   1  -5  10 5507.59 159.810   2
   1  -5   9 349.381 90.0951   3
   1   5  -9 388.240 95.0770   5
  -1   5   9 179.235 62.8103   5
  -1  -5  -9 166.267 65.1805   5
   1  -5   9 387.213 45.9706   2
   1  -5   8 3522.99 255.976   3
   1   5  -8 2575.18 240.588   5
  -1  -5  -8 2412.42 235.245   5
  -1   5   8 2468.85 216.455   5
   1  -5   8 2894.82 101.894   2
   1  -5   7 13998.5 494.690   3
  -1  -5  -7 11692.9 504.389   5
  -1   5   7 11722.1 458.770   5
   1   5  -7 11739.3 497.278   5
   1  -5   7 11455.7 184.038   2
   1  -5   6 327.389 83.5185   3
   1  -5   6 270.802 35.7009   2
   1   5  -6 108.277 61.3682   5
  -1  -5  -6 88.6400 50.2991   5
  -1   5   6 76.9325 37.6091   5
   1  -5   5 4351.72 265.185   3
   1  -5   5 3741.67 84.7948   2
  -1  -5  -5 4040.34 286.617   5
  -1   5   5 4105.25 270.310   5
   1  -5   4 5022.76 281.801   3
  -1  -5  -4 4850.54 311.907   5
  -1   5   4 5156.65 305.536   5
   1  -5   3 7987.83 344.310   3
  -1  -5  -3 7753.57 391.939   5
  -1   5   3 7469.08 364.764   5
   1  -5   2 8085.76 341.252   3
  -1   5   2 8273.53 385.900   5
  -1  -5  -2 8297.61 406.800   5
   1  -5   1 6127.90 298.680   3
   1  -5   1 6369.10 351.373   5
  -1  -5  -1 7038.42 371.148   5
   1  -5   0 8870.11 351.993   3
  -1  -5   0 8432.30 405.562   5
   1  -5   0 8972.58 412.669   5
   1  -5  -1 6845.38 308.942   3
   1  -5  -1 6647.18 111.280   2
  -1  -5   1 6447.44 353.146   5
   1  -5  -1 6569.04 348.601   5
   1  -5  -2 8213.15 335.860   3
   1  -5  -2 8154.25 139.084   2
   1  -5  -2 7923.91 376.216   5
  -1  -5   2 7995.09 393.136   5
   1  -5  -2 8307.12 289.426   4
   1  -5  -3 7694.25 326.415   3
   1  -5  -3 7852.97 151.353   2
   1  -5  -3 7542.35 366.401   5
  -1  -5   3 7342.79 378.824   5
  -1   5  -3 7240.33 182.694   4
   1  -5  -3 7426.44 286.150   4
   1  -5  -4 4984.57 262.648   3
   1  -5  -4 4770.94 128.686   2
   1  -5  -4 4483.83 280.549   5
  -1  -5   4 4396.89 294.737   5
   1  -5  -4 4871.13 234.369   4
  -1   5  -4 4508.00 143.327   4
   1  -5  -5 3855.81 124.425   2
   1  -5  -5 3713.58 230.991   3
   1   5   5 3795.50 181.663   2
   1  -5  -5 3930.48 264.352   5
  -1  -5   5 3999.04 282.408   5
   1  -5  -5 4083.62 219.357   4
  -1   5  -5 3570.60 128.768   4
   1  -5  -6 116.632 51.9426   3
   1   5   6 108.265 34.6862   2
   1  -5  -6 173.799 38.7876   2
   1  -5  -6 46.4099 33.7840   5
  -1  -5   6 189.515 62.0984   5
   1  -5  -6 143.524 48.3724   4
  -1  -5   6 74.8918 27.2623   4
  -1   5  -6 103.699 22.9331   4
   1   5   7 11588.5 319.024   2
   1  -5  -7 10889.8 239.676   2
   1  -5  -7 12043.7 416.220   3
   1  -5  -7 11911.8 454.363   5
  -1  -5   7 11689.1 488.143   5
  -1  -5   7 10904.5 246.332   4
  -1   5  -7 11466.2 245.742   4
   1  -5  -7 12156.3 391.318   4
   1   5   8 2581.47 154.624   2
   1  -5  -8 2622.33 196.076   3
   1  -5  -8 2607.82 123.304   2
  -1  -5   8 2903.17 244.950   5
   1  -5  -8 2452.33 209.173   5
   1  -5  -8 2637.98 187.559   4
  -1  -5   8 2616.23 116.472   4
   1  -5  -9 293.718 70.9265   3
   1  -5  -9 296.709 48.5921   2
   1   5   9 349.886 60.6872   2
   1  -5  -9 304.899 76.4105   5
  -1  -5   9 260.759 79.3581   5
  -1  -5   9 214.504 33.1687   4
   1  -5  -9 302.112 66.2508   4
   1   5  10 5872.90 238.658   2
   1  -5 -10 5737.76 294.420   3
   1  -5 -10 5518.96 194.611   2
   1  -5 -10 5906.33 325.618   5
   1  -5 -10 5836.90 287.194   4
   1  -5 -11 637.049 98.6666   3
   1  -5 -11 736.384 75.5645   2
   1   5  11 577.549 79.7538   2
   1  -5 -11 554.768 100.895   5
   1  -5 -11 653.116 107.523   4
   1  -5 -12 1312.01 141.682   3
   1  -5 -12 1376.48 108.275   2
   1  -5 -12 1322.31 156.117   5
   1  -5 -12 1370.93 148.144   4
   1  -5 -13 9373.99 286.425   2
   1  -5 -13 9469.64 382.603   3
   1  -5 -13 9673.93 423.603   5
   1   5  13 10661.9 539.334   5
   1  -5 -13 9215.47 385.058   4
   1  -5 -14 2101.20 179.032   3
   1  -5 -14 1972.48 136.614   2
   1  -5 -14 1983.77 194.659   5
   1   5  14 1903.99 234.151   5
   1  -5 -14 2371.67 207.504   4
   1  -5 -15 2674.56 164.792   2
   1  -5 -15 2664.29 203.079   3
   1  -5 -15 2566.21 225.365   5
   1  -5 -15 2615.50 214.174   4
   1  -5 -16 723.065 108.368   3
   1  -5 -16 792.959 93.5661   2
   1   5  16 783.857 98.2150   2
   1  -5 -16 751.633 172.341   1
   1  -5 -16 745.404 124.213   5
   1  -5 -16 745.139 123.017   4
   1   5  17 1039.90 116.439   2
   1  -5 -17 1025.97 123.895   3
   1  -5 -17 1052.78 110.007   2
   1  -5 -17 975.154 184.904   1
   1  -5 -17 1177.99 156.958   5
   1  -5 -17 1228.01 159.930   4
   1  -5 -18 1168.44 121.060   2
   1   5  18 1182.61 123.952   2
   1  -5 -18 962.362 186.278   1
   1  -5 -18 1188.74 158.830   5
   1  -5 -18 1559.28 184.402   4
   1  -5 -18 1210.19 134.123   3
  -1   5 -19 1725.57 163.454   2
   1  -5 -19 1724.14 150.028   2
   1   5  19 1542.06 144.746   2
   1  -5 -19 1424.18 231.682   1
   1  -5 -19 1656.59 193.183   5
   1  -5 -19 1896.68 210.383   4
   1  -5 -19 1645.85 155.919   3
   1  -5 -20 187.013 53.3134   3
  -1   5 -20 185.459 55.8429   2
   1  -5 -20 147.804 100.256   1
   1  -5 -20 252.127 60.9023   2
   1   5  20 134.665 60.9128   2
   1  -5 -20 56.7072 40.3382   5
   1  -5 -20 416.434 116.253   4
   1   5  21 3716.25 231.980   2
  -1   5 -21 3449.62 243.404   2
   1  -5 -21 3565.99 227.860   2
   1  -5 -21 3423.09 367.603   1
   1  -5 -21 3446.43 283.179   5
   1  -5 -21 3505.25 220.837   3
   1  -5 -21 4354.79 337.943   4
   1  -5 -22 1323.35 143.346   2
  -1   5 -22 1467.42 162.628   2
   1   5  22 1361.44 147.864   2
   1  -5 -22 1055.99 208.408   1
   1  -5 -22 1089.17 160.638   5
   1  -5 -22 1632.18 219.680   4
   1  -5 -22 1046.12 118.029   3
   1  -5 -23 3351.07 230.949   2
  -1   5 -23 3636.75 262.319   2
   1  -5 -23 3346.76 371.027   1
   1   5  23 3370.25 229.130   2
   1  -5 -23 3374.27 288.166   5
   1  -5 -23 3511.14 209.031   3
   1  -5 -23 4045.43 339.145   4
  -1   5 -24 626.406 118.179   2
   1  -5 -24 331.708 124.609   1
   1   5  24 429.659 91.8125   2
   1  -5 -24 582.302 127.419   5
   1  -5 -24 563.145 80.6018   3
   1  -5 -24 683.161 150.582   4
  -1   5 -25 1084.77 155.662   2
   1   5  25 1052.30 135.635   2
   1  -5 -25 1077.79 223.015   1
   1  -5 -25 1077.04 166.871   5
   1  -5 -25 1217.47 193.304   4
   1  -5 -25 1016.72 101.410   3
  -1   5 -26 1967.96 213.509   2
   1   5  26 1615.27 166.934   2
   1  -5 -26 1523.96 264.424   1
   1  -5 -26 1673.62 216.603   5
   1  -5 -26 1636.06 113.278   3
   1  -5 -26 1907.23 241.280   4
   1  -5 -27 1085.50 223.667   1
   1   5  27 1050.28 142.332   2
   1  -5 -27 1263.63 191.917   5
   1  -5 -27 1505.22 216.212   4
   1   5  28 223.808 73.1730   2
   1  -5 -28 246.712 131.345   1
   1  -5 -28 139.925 81.5297   5
   1  -5 -28 158.121 70.2667   4
   1   5  29 698.831 123.509   2
   1  -5 -29 542.557 159.274   1
   1  -5 -29 593.673 134.715   5
   1  -5 -29 661.507 148.448   4
   1   5  30 683.718 123.260   2
   1  -5 -30 621.961 189.315   1
   1  -5 -30 586.803 140.922   5
   1  -5 -30 683.420 154.451   4
   1   5  31 241.313 77.6253   2
   1  -5 -31 103.092 65.0525   1
   1  -5 -31 340.184 106.537   4
   1   5  32 367.015 96.9234   2
   1  -5 -32 572.798 152.821   4
   1   5  33 140.087 63.9373   2
   1  -5 -33 142.343 85.0618   4
   1   5  34-6.29780 44.4327   2
   1  -5 -34 177.863 99.6265   4
   1   5  35 728.404 146.588   2
   1  -5 -35 703.950 174.709   4
   1   5  36 104.479 71.3522   2
   1  -5 -36 157.034 91.3509   4
   1   5  37 1115.94 185.288   2
   1  -5 -37 948.542 206.226   4
   1   5  38 318.214 110.639   2
   1  -5 -38 314.165 123.504   4
   1   5  39 60.4509 66.3212   2
   1  -5 -39 114.927 87.2024   4
   1   5  40-18.4542 45.9715   2
   1   6 -42 134.135 125.076   5
   1   6 -41 190.437 123.921   5
   1   6 -40 150.857 111.549   5
   1   6 -39 218.876 126.811   5
   1   6 -38 273.687 117.428   5
   1  -6  37-10.4032 40.1502   2
   1   6 -37-72.4602 76.5046   5
   1   6 -37-130.770 74.5257   4
   1  -6  36 152.997 74.9481   2
   1   6 -36 207.346 98.5752   5
   1   6 -36 203.566 84.6957   4
   1  -6  35 247.200 95.6158   2
   1   6 -35 367.762 139.019   5
   1   6 -35 311.681 108.921   4
  -1  -6 -34 126.859 112.524   1
   1  -6  34 188.527 81.9070   2
   1   6 -34 162.543 102.370   5
   1   6 -34 227.720 108.597   4
   1  -6  33 980.210 160.723   2
  -1  -6 -33 1503.12 307.302   1
   1   6 -33 929.991 212.377   5
   1   6 -33 1137.84 180.385   4
  -1  -6 -32 15.7587 49.0853   1
   1  -6  32 154.498 72.4805   2
   1   6 -32 105.412 62.6750   4
  -1  -6 -31 333.466 138.955   1
   1  -6  31 326.382 90.3799   2
   1   6 -31 374.229 118.613   5
   1   6 -31 438.640 109.848   4
   1  -6  30 11.9829 33.8086   2
  -1  -6 -30 36.1927 101.690   1
   1   6 -30-33.5390 61.0975   5
   1   6 -30-2.52191 29.1035   4
   1  -6  29 88.3319 40.4302   2
  -1  -6 -29 114.614 110.385   1
   1   6 -29 223.459 106.855   5
   1   6 -29 136.574 61.0232   4
   1  -6  28 487.134 94.1339   2
  -1  -6 -28 597.052 188.868   1
   1   6 -28 418.161 122.266   5
   1   6 -28 600.446 122.826   4
   1  -6  27 2172.05 198.455   2
  -1  -6 -27 2733.74 384.752   1
   1   6 -27 2298.94 295.549   5
   1   6 -27 2244.42 220.272   4
   1  -6  26 304.719 81.3775   2
  -1  -6 -26 349.619 132.029   1
   1   6 -26 254.304 113.851   5
  -1  -6 -25 1846.22 96.4334   3
   1   6 -25 2188.07 178.145   2
   1  -6  25 2228.53 194.397   2
  -1  -6 -25 2327.46 337.815   1
   1   6 -25 2605.98 304.997   5
  -1  -6 -25 2279.30 124.646   3
  -1  -6 -24 466.590 54.6853   3
   1  -6  24 634.757 101.707   2
  -1  -6 -24 662.965 186.377   1
   1   6 -24 652.195 97.2221   2
   1   6 -24 792.517 175.423   5
  -1  -6 -24 549.065 72.3939   3
  -1  -6 -23 335.200 51.1426   3
   1  -6  23 315.162 77.5540   2
  -1  -6 -23 60.1466 83.3746   1
   1   6 -23 304.430 66.3558   2
   1   6 -23 354.006 122.839   5
   1   6 -23 384.186 83.6411   4
  -1  -6 -23 250.716 56.6461   3
  -1  -6 -22 1409.24 104.777   3
   1   6 -22 1455.95 133.350   2
  -1  -6 -22 1608.72 278.244   1
   1  -6  22 1482.68 141.940   2
   1   6 -22 1182.47 206.907   5
   1   6 -22 1580.77 167.131   4
   1   6 -21 978.615 110.848   2
   1   6 -21 1056.08 191.209   5
   1  -6  21 1164.52 123.227   2
  -1  -6 -21 1256.58 237.081   1
   1   6 -20 538.193 141.588   5
  -1  -6 -20 213.802 88.2244   1
   1  -6  20 419.129 75.3399   2
   1   6 -20 284.563 60.0417   2
   1   6 -19 1926.47 248.213   5
  -1   6  19 1927.66 235.289   5
   1   6 -19 1557.45 129.699   2
  -1  -6 -19 1693.26 280.428   1
   1  -6  19 1902.53 148.804   2
   1  -6  18 1845.36 207.635   3
   1   6 -18 1603.47 128.979   2
   1  -6  18 1631.93 133.322   2
   1   6 -18 1780.11 237.063   5
  -1   6  18 2063.46 239.606   5
   1  -6  17 698.651 131.281   3
   1  -6  17 597.106 77.3502   2
   1   6 -17 489.449 71.9542   2
   1   6 -17 492.488 132.406   5
  -1   6  17 432.810 119.044   5
   1  -6  16 29.7009 25.1161   3
   1  -6  16 27.9576 19.8077   2
   1   6 -16 5.41794 13.8363   2
  -1  -6 -16-3.99659 44.0494   5
   1   6 -16 6.86566 59.6207   5
  -1   6  16 132.297 65.2012   5
   1  -6  15 1514.05 188.649   3
   1   6 -15 952.143 94.6967   2
   1  -6  15 1090.77 94.6053   2
   1   6 -15 1055.99 181.221   5
  -1  -6 -15 965.149 170.410   5
  -1   6  15 1147.59 171.496   5
   1  -6  14 2997.00 268.560   3
   1   6 -14 2316.33 257.134   5
  -1   6  14 2000.60 225.502   5
  -1  -6 -14 1967.49 240.782   5
   1  -6  14 2232.26 129.783   2
   1   6 -14 1816.61 126.438   2
   1  -6  13 1939.10 214.262   3
   1   6 -13 1334.35 192.825   5
  -1   6  13 1131.80 167.130   5
  -1  -6 -13 1205.85 189.804   5
   1  -6  13 1268.29 94.5086   2
   1   6 -13 1115.80 97.4648   2
   1  -6  12 413.969 111.196   3
  -1   6  12 304.021 89.2983   5
  -1  -6 -12 324.452 102.669   5
   1   6 -12 225.956 92.3167   5
   1   6 -12 212.126 41.1658   2
   1  -6  12 265.538 42.7779   2
   1  -6  11 240.144 82.5812   3
  -1  -6 -11 161.910 80.8151   5
   1   6 -11 176.474 71.8444   5
   1   6 -11 140.635 35.4401   2
   1  -6  11 154.820 30.9625   2
   1  -6  10 1904.96 218.496   3
  -1  -6 -10 1275.12 192.813   5
   1   6 -10 1260.52 182.546   5
   1   6 -10 1327.12 104.007   2
   1  -6  10 1396.24 81.0726   2
  -1  -6  -9 5135.41 365.364   5
   1   6  -9 5598.09 380.631   5
   1   6  -9 4643.61 195.495   2
   1  -6   9 4999.48 142.032   2
   1  -6   8 1124.49 157.769   3
  -1  -6  -8 873.870 149.666   5
   1   6  -8 891.960 153.773   5
   1  -6   8 758.852 52.2625   2
   1  -6   7 201.472 70.9781   3
   1   6  -7 252.328 86.7877   5
  -1  -6  -7 233.894 97.9659   5
   1  -6   6 2076.70 203.297   3
  -1  -6  -6 1896.40 215.059   5
   1   6  -6 1657.31 204.100   5
   1  -6   5 1416.11 171.769   3
   1   6  -5 1104.56 166.053   5
  -1  -6  -5 954.744 153.443   5
   1  -6   4 5712.37 322.907   3
  -1  -6  -4 4197.92 318.503   5
   1  -6   3 2873.56 230.137   3
  -1  -6  -3 2416.04 237.877   5
   1  -6   2 7191.13 352.171   3
  -1  -6  -2 7285.44 413.065   5
   1  -6   1 1844.45 180.581   3
  -1  -6  -1 1837.79 207.196   5
   1  -6   1 1866.17 211.544   5
   1  -6   0 1920.33 180.596   3
  -1  -6   0 1858.65 210.596   5
   1  -6   0 1862.21 209.090   5
   1  -6  -1 1928.31 178.972   3
  -1   6  -1 1639.79 189.938   5
  -1  -6   1 1736.97 201.819   5
   1  -6  -1 1892.17 207.855   5
   1  -6  -2 6440.52 322.564   3
  -1   6  -2 6841.25 394.114   5
   1  -6  -2 7184.89 398.955   5
  -1  -6   2 6927.69 402.423   5
   1  -6  -2 6817.59 273.267   4
   1  -6  -3 2242.17 191.308   3
   1   6   3 2185.05 135.538   2
   1  -6  -3 2080.65 74.9255   2
  -1  -6   3 2245.25 230.020   5
   1  -6  -3 2095.22 215.698   5
  -1   6  -3 2376.24 234.814   5
   1  -6  -3 2323.60 166.991   4
   1  -6  -4 4066.59 116.518   2
   1   6   4 4141.18 183.484   2
   1  -6  -4 4370.92 265.953   3
  -1  -6   4 4671.56 334.110   5
   1  -6  -4 4125.29 302.906   5
  -1   6  -4 4289.38 317.144   5
   1  -6  -4 4340.84 229.248   4
   1  -6  -5 876.880 60.7149   2
   1   6   5 1010.92 92.6928   2
   1  -6  -5 922.697 125.201   3
  -1  -6   5 1093.95 167.572   5
   1  -6  -5 791.889 134.734   5
   1  -6  -5 946.705 109.175   4
  -1  -6   5 1138.58 83.9575   4
   1  -6  -6 1434.47 82.3908   2
   1  -6  -6 1724.52 169.042   3
   1   6   6 1567.41 115.246   2
  -1  -6   6 1650.26 198.435   5
   1  -6  -6 1505.09 180.186   5
   1  -6  -6 1565.81 145.467   4
  -1  -6   6 1666.10 90.4918   4
   1  -6  -7 139.924 53.8440   3
   1   6   7 134.702 37.3153   2
   1  -6  -7 125.430 28.2343   2
  -1  -6   7 190.913 66.8465   5
   1  -6  -7 221.073 73.7957   5
  -1  -6   7 153.437 25.3331   4
   1  -6  -7 107.470 43.2248   4
   1   6   8 831.056 86.8487   2
   1  -6  -8 740.658 68.6116   2
   1  -6  -8 776.678 115.776   3
  -1  -6   8 870.443 144.416   5
   1  -6  -8 771.254 130.630   5
   1  -6  -8 857.328 113.553   4
   1  -6  -9 4695.83 177.303   2
   1  -6  -9 5030.69 293.338   3
   1   6   9 4947.73 212.962   2
   1  -6  -9 4929.64 326.003   5
  -1  -6   9 5336.49 368.383   5
  -1   6  -9 4864.56 114.679   4
   1  -6  -9 4928.17 268.441   4
   1  -6 -10 1271.14 97.2310   2
   1   6  10 1251.36 110.052   2
   1  -6 -10 1418.04 158.627   3
   1  -6 -10 1380.17 178.458   5
   1   6  10 1353.67 197.296   5
   1  -6 -10 1248.18 141.699   4
  -1   6 -10 1342.13 68.4784   4
   1  -6 -11 178.743 56.5190   3
   1   6  11 171.233 47.6839   2
   1  -6 -11 132.017 36.2168   2
  -1   6 -11 85.4259 66.9946   5
   1  -6 -11 112.382 67.9059   5
   1   6  11 60.9161 35.6819   5
   1  -6 -11 102.039 50.6626   4
   1  -6 -12 384.833 88.0011   3
   1  -6 -12 297.881 52.4594   2
  -1   6 -12 248.969 91.6069   5
   1  -6 -12 152.649 54.9237   5
   1   6  12 330.559 103.375   5
   1  -6 -12 280.824 70.7164   4
   1  -6 -13 1182.89 146.036   3
   1  -6 -13 1123.05 102.915   2
  -1   6 -13 1243.28 194.254   5
   1  -6 -13 1212.42 167.711   5
   1  -6 -13 1221.06 145.424   4
   1   6  13 1264.99 196.913   5
   1  -6 -14 2107.78 195.414   3
   1  -6 -14 1960.34 140.837   2
   1  -6 -14 2077.30 221.623   5
  -1   6 -14 2151.61 257.811   5
   1   6  14 2200.21 261.299   5
   1  -6 -14 2049.90 191.858   4
   1  -6 -15 904.568 98.8756   2
   1  -6 -15 982.991 133.880   3
  -1   6 -15 1200.69 192.582   5
   1  -6 -15 1094.18 161.707   5
   1   6  15 969.836 181.904   5
   1  -6 -15 943.791 136.228   4
   1  -6 -16 32.7598 40.0918   3
   1  -6 -16-3.92453 19.1137   2
   1   6  16 13.5976 23.0466   2
  -1   6 -16-2.54850 50.8481   5
   1  -6 -16-29.1304 39.8230   5
   1  -6 -16 36.4063 49.6585   4
   1  -6 -17 517.900 96.4535   3
   1  -6 -17 526.976 83.6484   2
   1   6  17 508.649 81.9411   2
   1  -6 -17 474.699 111.745   5
  -1   6 -17 387.210 108.678   5
   1  -6 -17 634.152 122.156   4
   1   6  18 1611.99 142.693   2
   1  -6 -18 1746.00 175.580   3
   1  -6 -18 1658.10 148.942   2
   1  -6 -18 1984.55 298.456   1
   1  -6 -18 1928.22 220.691   5
  -1   6 -18 1988.17 268.063   5
   1  -6 -18 1895.38 213.714   4
   1  -6 -19 1892.47 181.733   3
   1  -6 -19 1518.71 149.554   2
   1   6  19 1714.38 154.439   2
   1  -6 -19 1484.41 249.365   1
  -1   6 -19 1703.87 240.468   5
   1  -6 -19 1912.20 219.981   5
   1  -6 -19 1904.18 209.502   4
   1  -6 -20 386.047 81.5575   3
   1  -6 -20 469.588 136.359   1
   1  -6 -20 313.536 72.7331   2
   1   6  20 305.504 72.8311   2
   1  -6 -20 225.654 80.4658   5
  -1   6 -20 560.998 148.035   5
   1  -6 -20 505.539 112.559   4
   1  -6 -21 1110.02 134.779   2
   1  -6 -21 1182.00 226.612   1
   1   6  21 1161.92 132.843   2
  -1   6 -21 1301.14 223.164   5
   1  -6 -21 1393.42 194.992   5
   1  -6 -21 1127.99 138.927   3
   1  -6 -21 1265.31 187.369   4
   1  -6 -22 1338.63 153.064   2
   1  -6 -22 1238.86 229.104   1
   1   6  22 1321.43 140.088   2
   1  -6 -22 1652.02 214.748   5
   1  -6 -22 1554.32 211.754   4
   1  -6 -22 1615.15 162.188   3
   1  -6 -23 196.362 58.2802   3
   1  -6 -23 291.284 76.6899   2
   1  -6 -23 81.6959 59.3567   1
   1   6  23 214.146 64.0170   2
   1  -6 -23 144.485 75.3524   5
   1  -6 -23 215.721 91.2795   4
   1  -6 -24 542.875 92.9433   3
   1   6  24 770.354 118.415   2
   1  -6 -24 753.143 197.477   1
   1  -6 -24 552.882 131.266   5
   1  -6 -24 692.642 156.283   4
   1   6  25 2183.86 193.357   2
   1  -6 -25 2281.60 333.031   1
   1  -6 -25 2586.83 279.561   5
   1  -6 -25 2549.05 282.039   4
   1  -6 -25 2388.20 182.072   3
   1  -6 -26 283.852 132.176   1
   1   6  26 330.902 85.8456   2
   1  -6 -26 275.390 114.436   5
   1  -6 -26 264.713 61.5816   3
   1  -6 -26 464.301 135.915   4
   1  -6 -27 2191.91 334.646   1
   1   6  27 2127.71 197.722   2
   1  -6 -27 2734.83 296.361   4
   1   6  28 732.832 124.452   2
   1  -6 -28 520.282 180.413   1
   1  -6 -28 993.801 179.514   4
   1   6  29 247.006 74.2518   2
   1  -6 -29 221.304 124.215   1
   1  -6 -29 224.293 95.4683   4
   1   6  30-2.80951 34.0379   2
   1  -6 -30 108.902 77.1687   4
   1  -6 -31 380.116 176.211   1
   1   6  31 318.700 88.7678   2
   1  -6 -31 291.786 97.1564   4
   1   6  32 40.1242 48.5255   2
   1  -6 -32 73.6789 50.4551   4
   1  -6 -33 1489.41 309.176   1
   1   6  33 1259.40 178.290   2
   1  -6 -33 1363.44 223.314   4
   1   6  34 222.448 85.1565   2
   1  -6 -34 182.166 107.678   4
   1   6  35 252.430 90.0068   2
   1  -6 -35 440.870 142.201   4
   1   6  36 351.218 106.441   2
   1  -6 -36 436.678 137.354   4
   1   6  37-18.0482 52.3556   2
   1  -6 -37 20.1037 51.1888   4
   1   6  38 283.355 99.5071   2
   1   6  39 172.849 88.6684   2
   1   7 -41 49.7220 115.725   5
   1   7 -40 342.396 180.369   5
   1   7 -39 41.4155 78.0654   5
   1   7 -38-118.269 95.1753   5
   1   7 -37 67.3449 66.8273   5
   1   7 -36 155.065 119.012   5
  -1  -7 -35 35.4377 88.6068   1
   1   7 -35 100.496 75.9510   5
  -1  -7 -34 122.800 118.167   1
   1   7 -34 286.233 132.132   5
  -1  -7 -33 26.2210 73.9699   1
   1   7 -33 287.158 98.6876   5
  -1  -7 -32 93.9960 115.685   1
   1   7 -32 140.584 86.5916   5
  -1  -7 -31 164.844 130.230   1
   1   7 -31 142.561 86.8415   5
   1   7 -30-71.1339 73.9195   5
   1   7 -30-43.6736 45.0178   4
  -1  -7 -29 16.6364 59.5553   1
   1   7 -29 69.2482 58.2957   5
  -1  -7 -28 589.026 193.499   1
   1   7 -28 353.186 141.745   5
   1  -7  27 210.871 68.0518   2
  -1  -7 -27 285.827 157.364   1
   1   7 -27 246.192 106.870   5
   1  -7  26 1152.05 150.742   2
  -1  -7 -26 1598.32 313.544   1
   1   7 -26 1557.44 257.727   5
   1  -7  25 73.1144 38.3736   2
  -1  -7 -25 21.8965 77.2702   1
   1   7 -25 73.2279 40.9056   2
   1   7 -25 179.768 116.964   5
  -1  -7 -25 76.1629 40.8144   3
   1   7 -24 698.558 170.596   5
  -1  -7 -24 650.690 194.516   1
   1  -7  24 702.288 105.271   2
   1   7 -24 495.423 82.1788   2
  -1  -7 -23 105.147 33.7862   3
   1   7 -23 315.342 117.197   5
   1  -7  23 121.231 47.4843   2
  -1  -7 -23 96.5056 102.258   1
   1   7 -23 186.447 51.2274   2
  -1  -7 -22 423.897 68.9325   3
   1   7 -22 386.624 113.092   5
  -1  -7 -22 400.432 140.701   1
   1  -7  22 371.756 72.2762   2
   1   7 -22 420.504 73.9206   2
  -1  -7 -21 658.083 84.4987   3
  -1  -7 -21 280.358 111.842   1
   1  -7  21 620.408 90.8621   2
   1   7 -21 517.470 77.5875   2
   1   7 -21 510.211 149.052   5
   1  -7  20 73.9599 37.4378   2
   1   7 -20 67.6934 28.7880   2
   1   7 -20 77.7898 83.7370   5
  -1   7  20 90.7277 37.7224   5
   1   7 -19 2191.82 151.971   2
   1  -7  19 2182.39 164.435   2
   1   7 -19 2279.30 287.744   5
  -1   7  19 2588.07 290.287   5
   1  -7  18 2590.67 170.099   2
   1   7 -18 2417.81 154.083   2
   1   7 -18 2638.34 303.701   5
  -1   7  18 2292.75 268.794   5
   1   7 -17 1658.69 125.512   2
   1   7 -17 2358.39 286.145   5
  -1   7  17 1608.69 224.730   5
   1   7 -16 2303.66 142.567   2
  -1   7  16 2619.34 280.782   5
   1   7 -16 2547.75 293.660   5
   1   7 -15 624.950 76.4894   2
   1   7 -15 733.648 166.972   5
  -1   7  15 708.021 145.001   5
  -1   7  14 5855.83 412.745   5
   1   7 -14 6350.39 452.094   5
   1   7 -14 5200.06 204.095   2
  -1   7  13 414.040 119.096   5
   1   7 -13 777.788 191.402   5
   1   7 -13 641.169 75.5366   2
  -1   7  12 846.354 162.170   5
   1   7 -12 786.367 165.660   5
   1   7 -12 754.963 75.0730   2
  -1   7  11 516.785 126.597   5
   1   7 -11 469.554 130.220   5
   1   7 -11 401.177 54.1198   2
   1   7 -10 1897.22 245.335   5
  -1   7  10 1389.83 199.334   5
   1   7 -10 1568.82 104.617   2
   1  -7   9 658.551 140.899   3
   1   7  -9 413.458 119.448   5
  -1  -7  -9 263.613 91.0791   5
  -1   7   9 335.291 98.1344   5
   1   7  -9 412.929 54.9360   2
   1  -7   8 3948.55 321.498   3
  -1  -7  -8 2872.49 291.132   5
   1   7  -8 3398.65 319.220   5
  -1   7   8 2964.40 284.532   5
   1   7  -8 2612.16 133.409   2
   1  -7   7 313.741 90.9733   3
  -1  -7  -7 449.157 114.534   5
  -1   7   7 340.303 96.8330   5
   1   7  -7 205.097 88.5137   5
   1   7  -7 184.837 35.8610   2
   1  -7   6 828.558 141.456   3
   1   7  -6 776.973 161.204   5
  -1  -7  -6 936.831 161.798   5
  -1   7   6 830.530 151.172   5
   1  -7   5 1809.85 204.686   3
  -1   7   5 1927.88 226.932   5
  -1  -7  -5 1694.99 224.729   5
   1   7  -5 1740.97 229.942   5
   1  -7   4 1878.45 201.784   3
  -1   7   4 1523.36 203.604   5
   1   7  -4 1424.30 212.150   5
  -1  -7  -4 1444.29 198.639   5
   1  -7   3 527.006 109.744   3
   1   7  -3 293.099 95.7421   5
  -1   7   3 236.080 88.2856   5
  -1  -7  -3 329.779 96.0629   5
   1  -7   2 1279.68 161.201   3
  -1   7   2 1306.42 186.538   5
  -1  -7  -2 1337.57 193.941   5
   1   7  -2 1332.13 199.086   5
   1  -7   1 700.825 119.475   3
   1  -7   1 647.510 133.672   5
  -1   7   1 968.494 159.960   5
   1   7  -1 787.668 155.072   5
  -1  -7  -1 939.896 162.508   5
   1  -7   0 682.695 115.601   3
   1  -7   0 748.652 144.129   5
   1   7   0 786.181 155.329   5
  -1   7   0 535.490 119.964   5
  -1  -7   0 698.596 138.029   5
   1   7   1 700.579 72.1887   2
   1  -7  -1 678.555 116.591   3
  -1   7  -1 740.057 140.784   5
   1  -7  -1 902.990 160.797   5
   1   7   1 765.742 161.331   5
  -1  -7   1 892.845 156.107   5
   1  -7  -2 1180.34 151.919   3
   1   7   2 1204.33 93.7054   2
   1  -7  -2 1274.92 186.085   5
  -1  -7   2 952.047 160.717   5
  -1   7  -2 994.277 167.077   5
   1   7   2 1131.98 184.911   5
   1  -7  -3 284.075 76.4986   3
   1   7   3 301.648 48.8904   2
  -1  -7   3 420.334 111.416   5
   1  -7  -3 407.340 110.371   5
  -1   7  -3 338.961 97.3197   5
   1   7   3 303.962 94.7505   5
   1  -7  -3 293.285 66.1359   4
   1  -7  -4 1506.31 168.717   3
   1   7   4 1439.53 103.229   2
  -1  -7   4 1565.53 208.753   5
   1  -7  -4 1578.82 203.724   5
  -1   7  -4 1397.97 201.314   5
   1   7   4 1493.57 214.806   5
   1  -7  -4 1589.10 146.664   4
   1  -7  -5 1671.44 178.517   3
   1   7   5 1694.66 114.175   2
   1   7   5 1778.43 232.879   5
   1  -7  -5 1754.78 215.348   5
  -1  -7   5 1330.49 194.998   5
  -1   7  -5 1605.14 215.616   5
  -1  -7   5 1530.76 80.7377   4
   1  -7  -5 1764.81 157.279   4
   1   7   6 824.211 80.6407   2
   1  -7  -6 722.547 63.4419   2
   1  -7  -6 853.287 129.294   3
   1   7   6 766.277 157.402   5
   1  -7  -6 933.834 154.659   5
  -1   7  -6 755.039 155.738   5
  -1  -7   6 728.952 144.058   5
   1  -7  -6 905.845 115.281   4
  -1  -7   6 644.170 43.5332   4
   1  -7  -7 270.201 77.9990   3
   1  -7  -7 217.036 39.8299   2
   1   7   7 236.238 46.3917   2
   1   7   7 146.428 68.7046   5
   1  -7  -7 241.788 87.3969   5
  -1  -7   7 165.913 73.6318   5
  -1   7  -7 222.006 96.6341   5
   1  -7  -7 439.956 85.6769   4
   1   7   8 2560.44 147.572   2
   1  -7  -8 2988.99 240.525   3
   1  -7  -8 2511.46 130.647   2
  -1   7  -8 2296.98 263.226   5
   1  -7  -8 2756.15 267.224   5
  -1  -7   8 2917.04 297.095   5
   1   7   8 2688.55 294.978   5
   1  -7  -8 2908.65 214.847   4
   1  -7  -9 381.165 89.1321   3
   1  -7  -9 284.509 50.3358   2
   1   7   9 328.391 54.5661   2
   1   7   9 331.308 112.435   5
  -1  -7   9 487.398 126.728   5
  -1   7  -9 420.467 120.332   5
   1  -7  -9 340.769 96.0212   5
   1  -7  -9 278.756 68.4626   4
   1   7  10 1649.96 122.605   2
   1  -7 -10 1836.71 192.378   3
   1  -7 -10 1546.06 114.096   2
  -1   7 -10 1481.28 218.925   5
   1   7  10 1658.20 233.051   5
   1  -7 -10 1907.91 223.769   5
   1  -7 -10 1535.33 161.826   4
   1  -7 -11 372.386 91.0364   3
   1  -7 -11 336.878 56.7418   2
  -1   7 -11 407.299 119.168   5
   1  -7 -11 472.278 113.124   5
   1   7  11 401.001 120.489   5
   1  -7 -11 346.734 83.1211   4
   1  -7 -12 856.661 137.951   3
   1  -7 -12 816.931 90.1593   2
   1  -7 -12 973.567 162.891   5
  -1   7 -12 1100.55 194.728   5
   1   7  12 817.669 171.073   5
   1  -7 -12 731.641 116.473   4
   1  -7 -13 649.546 116.015   3
   1  -7 -13 425.165 69.2257   2
   1  -7 -13 703.459 143.401   5
  -1   7 -13 803.909 180.348   5
   1  -7 -13 467.437 103.389   4
   1   7  13 573.187 167.313   5
   1  -7 -14 4896.27 233.609   2
   1  -7 -14 5633.99 343.168   3
   1   7  14 6254.65 469.957   5
  -1   7 -14 5721.71 438.071   5
   1  -7 -14 5811.27 395.139   5
   1  -7 -14 5825.26 336.711   4
   1  -7 -15 790.771 101.550   2
   1  -7 -15 923.696 142.729   3
   1   7  15 874.421 104.741   2
  -1   7 -15 1021.39 200.889   5
   1  -7 -15 842.321 154.886   5
   1  -7 -15 888.484 139.080   4
   1   7  15 931.296 191.208   5
   1  -7 -16 2393.96 174.602   2
   1   7  16 2636.51 175.267   2
   1  -7 -16 2756.49 240.888   3
  -1   7 -16 2555.77 301.645   5
   1   7  16 2671.44 317.231   5
   1  -7 -16 2509.27 266.651   5
  -1   7 -16 2138.15 78.6838   4
   1  -7 -16 2570.33 237.362   4
   1  -7 -17 1766.30 191.508   3
   1  -7 -17 1534.35 146.539   2
   1   7  17 1563.27 139.098   2
  -1   7 -17 1966.50 272.256   5
   1  -7 -17 1414.53 200.466   5
   1  -7 -17 1874.36 207.705   4
   1   7  17 1610.34 255.371   5
   1   7  18 2255.47 170.273   2
   1  -7 -18 2006.80 171.826   2
   1  -7 -18 2153.02 214.083   3
   1  -7 -18 1922.65 236.230   5
  -1   7 -18 2342.31 297.903   5
   1  -7 -18 2378.07 236.068   4
   1  -7 -19 2117.05 208.399   3
   1  -7 -19 2246.01 188.604   2
   1   7  19 2110.87 166.864   2
  -1   7 -19 2587.21 324.211   5
   1  -7 -19 2315.18 260.370   5
   1  -7 -19 2212.51 231.210   4
   1  -7 -20 81.5438 48.2886   3
   1  -7 -20-48.3122 87.4970   1
   1  -7 -20 13.2590 29.7060   2
   1   7  20 124.329 43.6962   2
   1  -7 -20 90.9627 61.8580   5
  -1   7 -20 35.9582 61.0203   5
   1  -7 -20 90.1701 60.0049   4
   1  -7 -21 641.174 113.755   3
   1   7  21 481.225 83.0811   2
   1  -7 -21 651.222 106.056   2
   1  -7 -21 488.433 148.920   1
  -1   7 -21 515.799 144.303   5
   1  -7 -21 682.021 151.583   5
   1  -7 -21 454.355 116.914   4
   1  -7 -22 326.364 84.9013   3
   1  -7 -22 368.316 130.779   1
   1  -7 -22 311.149 83.2939   2
   1   7  22 360.943 74.1840   2
  -1   7 -22 542.042 159.078   5
   1  -7 -22 296.857 104.625   4
   1  -7 -23 89.1691 39.5270   3
   1  -7 -23 87.9187 55.2600   1
   1   7  23 89.6064 45.1974   2
  -1   7 -23 53.9902 73.6543   5
   1  -7 -23 179.922 85.0075   4
   1   7  24 532.199 99.2915   2
   1  -7 -24 642.234 180.179   1
  -1   7 -24 626.913 170.410   5
   1  -7 -24 659.608 150.939   4
   1   7  25 99.0527 46.9330   2
   1  -7 -25 121.151 101.752   1
  -1   7 -25 84.5453 71.0612   5
   1  -7 -25 125.721 77.4257   4
   1   7  26 1188.40 145.598   2
   1  -7 -26 1532.38 303.217   1
  -1   7 -26 1575.98 267.191   5
   1  -7 -26 1549.37 227.752   4
   1  -7 -27 169.354 90.8185   1
   1   7  27 116.063 49.5397   2
  -1   7 -27 287.412 130.785   5
   1  -7 -27 337.915 123.761   4
   1   7  28 288.013 81.5485   2
   1  -7 -28 495.635 171.020   1
  -1   7 -28 317.614 118.633   5
   1  -7 -28 695.666 162.801   4
   1   7  29 47.5194 33.0755   2
   1  -7 -29 67.6527 62.5732   1
  -1   7 -29-124.856 88.1748   5
   1  -7 -29 117.450 89.5420   4
   1   7  30 22.4216 45.1257   2
   1  -7 -30 33.4411 72.9167   1
  -1   7 -30-16.7188 66.7739   5
  -1   7 -30-23.7851 22.2807   4
   1  -7 -30 71.6353 52.1588   4
   1  -7 -31 192.462 135.181   1
   1   7  31 140.262 68.0038   2
  -1   7 -31 323.815 140.612   5
   1  -7 -31 311.405 119.671   4
   1   7  32 71.3019 50.4905   2
   1  -7 -32 59.6410 87.9122   1
   1  -7 -32-58.7072 56.3925   4
   1   7  33 97.3567 61.3315   2
   1  -7 -33 202.542 121.031   1
  -1   7 -33 173.674 108.123   5
   1  -7 -33 189.375 102.469   4
   1   7  34 210.317 81.8512   2
   1  -7 -34 178.464 103.584   1
  -1   7 -34 378.028 158.563   5
   1  -7 -34 246.479 113.568   4
   1   7  35 91.8064 44.7788   2
   1  -7 -35-44.4257 91.5618   1
  -1   7 -35-61.9642 84.4586   5
   1  -7 -35 60.1487 75.2678   4
   1   7  36 69.3676 49.8120   2
   1  -7 -36 164.702 114.660   1
  -1   7 -36 191.246 127.961   5
   1  -7 -36-41.1720 63.2155   4
   1   7  37 157.780 101.446   2
  -1   7 -37 18.5269 97.3914   5
   1   7  38 62.7092 71.5605   2
   1   8 -38 96.5250 116.183   5
   1   8 -37 210.844 151.146   5
   1   8 -36 685.030 213.626   5
   1   8 -35 237.086 140.143   5
   1   8 -34 465.112 173.153   5
  -1  -8 -33-53.4824 103.207   1
   1   8 -33 122.344 94.0326   5
  -1  -8 -32 297.371 149.684   1
   1   8 -32 8.06897 77.3468   5
  -1  -8 -31-173.224 124.826   1
   1   8 -31 278.564 125.518   5
  -1  -8 -30 695.363 227.974   1
   1   8 -30 677.927 188.973   5
  -1  -8 -29 38.5499 85.0223   1
   1   8 -29 61.9115 84.6101   5
  -1  -8 -28 596.545 197.933   1
   1   8 -28 850.400 203.858   5
  -1  -8 -27 125.140 103.724   1
   1   8 -27 460.535 171.485   5
  -1  -8 -26 533.942 208.116   1
   1   8 -26 526.236 159.493   5
  -1  -8 -25 974.637 263.018   1
   1   8 -25 1004.08 214.725   5
  -1  -8 -24 537.217 184.890   1
   1   8 -24 661.149 176.356   5
   1   8 -23 666.291 92.2419   2
  -1  -8 -23 750.366 216.703   1
   1   8 -23 562.547 164.189   5
  -1  -8 -22 183.481 109.604   1
   1   8 -22 199.946 49.2056   2
   1   8 -22 305.133 122.031   5
   1   8 -21 505.240 76.8599   2
   1   8 -21 547.031 156.280   5
  -1   8  21 494.818 142.749   5
   1   8 -20 413.452 66.2039   2
   1   8 -20 508.127 147.558   5
  -1   8  20 422.173 130.000   5
   1   8 -19 74.5176 35.0517   2
   1   8 -19 103.476 45.3304   5
  -1   8  19 163.379 93.6735   5
   1   8 -18 821.078 88.4613   2
   1   8 -18 861.972 190.339   5
  -1   8  18 921.950 188.125   5
   1   8 -17 637.019 76.3182   2
   1   8 -17 973.526 200.862   5
  -1   8  17 922.607 183.343   5
   1   8 -16 1189.26 98.9586   2
   1   8 -16 1219.50 217.276   5
  -1   8  16 1153.94 208.333   5
   1   8 -15 1509.89 107.693   2
  -1   8  15 1668.01 240.379   5
   1   8 -15 2091.35 282.752   5
   1   8 -14 1475.34 241.223   5
  -1   8  14 1492.33 221.521   5
   1   8 -14 1222.33 96.2310   2
   1   8 -13 3561.42 366.493   5
  -1   8  13 4025.11 370.436   5
   1   8 -13 3477.62 153.624   2
   1   8 -12 1161.02 221.392   5
  -1   8  12 940.967 187.268   5
   1   8 -12 1041.07 83.8495   2
   1   8 -11 1043.04 204.552   5
  -1   8  11 871.577 172.423   5
   1   8 -11 902.660 74.1166   2
   1   8 -10 1073.48 204.231   5
  -1   8  10 638.794 142.446   5
   1   8 -10 780.454 67.6332   2
  -1   8   9 1656.79 231.466   5
   1   8  -9 1716.02 253.709   5
   1   8  -9 1579.55 94.5124   2
   1   8  -8 754.823 172.792   5
  -1   8   8 808.663 164.111   5
   1   8  -8 585.762 58.0355   2
  -1   8   7 2425.10 277.739   5
   1   8  -7 2190.17 279.311   5
   1   8  -7 2115.22 105.476   2
  -1   8   6 1083.01 181.469   5
   1   8  -6 1240.39 210.818   5
   1   8  -6 1065.73 77.3303   2
  -1   8   5 342.385 107.848   5
   1   8  -5 379.176 127.904   5
   1   8  -5 272.546 40.2841   2
   1   8  -4 2885.59 319.973   5
  -1   8   4 2936.85 308.594   5
  -1   8   3 281.159 100.486   5
   1   8  -3 228.170 95.5375   5
   1   8  -2 1173.86 202.963   5
  -1   8   2 1150.97 187.954   5
   1   8  -1 212.240 90.7999   5
  -1   8   1 204.338 88.6601   5
   1   8  -1 259.710 39.3596   2
   1   8   0 221.159 89.0524   5
  -1   8   0 171.619 71.5999   5
   1   8   0 147.900 30.7082   2
   1   8   1 266.304 103.157   5
  -1   8  -1 361.403 103.278   5
   1   8   1 259.748 39.3191   2
   1   8   2 1015.60 77.8350   2
  -1   8  -2 1024.43 182.150   5
   1   8   2 1187.54 203.146   5
   1  -8  -3 403.779 99.9956   3
   1   8   3 211.352 40.5497   2
   1   8   3 409.824 138.167   5
  -1   8  -3 237.604 86.2308   5
   1  -8  -3 269.985 65.7173   4
   1   8   4 2698.91 132.084   2
   1  -8  -4 2898.36 253.655   3
  -1   8  -4 2885.43 312.313   5
   1   8   4 2638.83 302.345   5
  -1  -8   4 2484.76 91.0671   4
   1  -8  -4 2967.49 205.854   4
   1  -8  -5 325.924 83.7958   3
   1   8   5 298.790 52.9077   2
   1   8   5 310.504 110.347   5
   1  -8  -5 394.189 127.850   5
  -1   8  -5 294.468 113.670   5
   1  -8  -5 365.635 77.0206   4
   1  -8  -6 1127.56 159.827   3
   1   8   6 1133.40 89.7681   2
   1  -8  -6 1064.15 184.839   5
   1   8   6 1165.80 203.908   5
  -1   8  -6 1137.49 193.870   5
   1  -8  -6 1296.17 142.880   4
   1  -8  -7 2082.77 215.841   3
   1   8   7 2071.69 121.827   2
  -1   8  -7 2051.28 263.466   5
   1  -8  -7 1924.71 245.617   5
   1   8   7 2092.61 275.450   5
   1  -8  -7 2271.39 192.927   4
   1  -8  -8 718.418 132.687   3
   1   8   8 813.078 81.4135   2
   1  -8  -8 850.570 161.360   5
   1   8   8 911.356 191.106   5
  -1   8  -8 717.896 168.792   5
   1  -8  -8 696.264 111.152   4
   1   8   9 1655.72 115.249   2
   1  -8  -9 1750.17 204.394   3
   1   8   9 1721.65 251.612   5
  -1   8  -9 1418.01 225.695   5
   1  -8  -9 1698.40 177.189   4
   1  -8 -10 663.094 129.465   3
   1   8  10 714.735 81.2904   2
   1  -8 -10 629.463 78.3332   2
   1   8  10 689.101 173.129   5
  -1   8 -10 911.297 183.856   5
   1  -8 -10 667.578 111.432   4
   1  -8 -11 920.050 97.1142   2
   1  -8 -11 1365.24 179.883   3
  -1   8 -11 886.293 181.855   5
   1   8  11 944.559 189.068   5
   1  -8 -11 1187.27 152.401   4
   1  -8 -12 984.223 102.081   2
   1  -8 -12 1206.17 170.688   3
  -1   8 -12 1210.31 217.117   5
   1  -8 -12 1190.51 157.298   4
   1   8  12 1075.26 208.553   5
   1  -8 -13 3957.73 309.721   3
   1  -8 -13 3437.69 196.431   2
  -1   8 -13 3704.73 374.461   5
   1   8  13 4124.50 403.508   5
   1  -8 -13 4041.30 289.141   4
   1  -8 -14 1330.53 126.536   2
   1  -8 -14 1431.87 189.402   3
  -1   8 -14 1469.91 252.090   5
   1   8  14 1452.90 245.899   5
   1  -8 -14 1477.58 180.271   4
   1  -8 -15 1861.39 214.382   3
   1   8  15 1596.89 132.537   2
   1  -8 -15 1468.43 138.058   2
  -1   8 -15 1844.95 274.237   5
   1  -8 -15 1682.50 193.725   4
   1   8  15 1688.50 262.252   5
   1  -8 -16 1210.51 178.624   3
   1  -8 -16 1047.81 124.301   2
   1   8  16 1109.95 112.313   2
  -1   8 -16 1660.52 263.992   5
   1  -8 -16 1140.05 165.476   4
   1   8  16 1116.10 217.142   5
   1  -8 -17 793.836 146.843   3
   1   8  17 911.618 105.097   2
   1  -8 -17 527.622 103.851   2
  -1   8 -17 775.413 185.075   5
   1   8  17 817.980 191.052   5
   1  -8 -17 638.650 129.675   4
   1  -8 -18 734.412 136.821   3
   1   8  18 802.958 103.156   2
   1  -8 -18 861.542 113.805   2
  -1   8 -18 692.251 170.384   5
   1   8  18 875.413 196.432   5
   1  -8 -18 844.416 142.252   4
   1  -8 -19 106.740 50.1965   3
   1   8  19 172.069 58.2519   2
   1  -8 -19 163.853 58.9806   2
  -1   8 -19 164.445 88.3251   5
   1  -8 -19 185.837 81.9487   4
   1  -8 -20 381.177 98.5930   3
   1   8  20 366.097 75.9868   2
   1  -8 -20 330.367 85.0942   2
  -1   8 -20 643.226 169.459   5
   1  -8 -20 343.202 100.020   4
   1  -8 -21 532.055 117.320   3
   1  -8 -21 417.520 149.078   1
   1  -8 -21 526.821 104.704   2
   1   8  21 509.951 89.2043   2
  -1   8 -21 463.543 148.130   5
   1  -8 -21 591.431 125.603   4
   1  -8 -22 118.907 85.6479   1
   1  -8 -22 169.452 74.6184   2
   1   8  22 242.807 66.4063   2
   1  -8 -22 296.546 107.417   4
   1   8  23 564.112 98.1146   2
   1  -8 -23 553.450 188.338   1
  -1   8 -23 704.186 177.324   5
   1  -8 -23 758.177 158.817   4
   1   8  24 515.385 94.3337   2
   1  -8 -24 271.170 118.114   1
  -1   8 -24 547.097 144.841   5
   1  -8 -24 525.836 137.399   4
   1   8  25 780.288 116.506   2
   1  -8 -25 1007.98 247.585   1
  -1   8 -25 981.016 213.921   5
   1  -8 -25 934.473 179.422   4
   1   8  26 437.071 93.1565   2
   1  -8 -26 587.426 182.679   1
  -1   8 -26 528.721 152.505   5
   1  -8 -26 755.268 158.780   4
   1   8  27 272.465 77.7874   2
   1  -8 -27 300.580 156.519   1
  -1   8 -27 233.786 118.865   5
   1  -8 -27 261.202 107.490   4
   1   8  28 381.597 92.4234   2
   1  -8 -28 439.296 168.979   1
  -1   8 -28 362.971 138.951   5
   1  -8 -28 452.452 134.275   4
   1   8  29 120.347 60.2812   2
   1  -8 -29 144.171 125.535   1
  -1   8 -29 43.1541 101.497   5
   1  -8 -29 68.9292 65.8139   4
   1   8  30 621.623 121.413   2
   1  -8 -30 413.776 179.517   1
  -1   8 -30 686.097 205.375   5
   1  -8 -30 404.679 130.651   4
   1   8  31-36.0711 52.2150   2
  -1   8 -31 33.7107 96.3243   5
   1  -8 -31 104.250 83.9080   4
   1   8  32 16.5145 35.0278   2
   1  -8 -32 117.605 102.473   1
  -1   8 -32 230.052 140.173   5
   1  -8 -32 52.0682 70.6232   4
   1  -8 -33-67.5884 87.5493   1
   1   8  33-105.078 67.2675   2
  -1   8 -33 82.9128 84.1993   5
   1  -8 -33-26.1948 72.1291   4
   1   8  34 197.907 89.5250   2
  -1   8 -34 304.179 158.013   5
   1  -8 -34 245.526 108.722   4
   1   8  35 120.937 62.9713   2
   1  -8 -35 344.566 141.326   4
   1   8  36 453.833 128.794   2
   1   8  37 97.0110 106.010   2
   1   9 -34 122.970 122.527   5
   1   9 -33 29.2524 59.6075   5
   1   9 -32 171.526 115.623   5
   1   9 -31 168.167 114.049   5
  -1  -9 -30 132.819 135.416   1
   1   9 -30 203.338 128.698   5
  -1  -9 -29 990.138 286.785   1
   1   9 -29 965.533 243.781   5
  -1  -9 -28-0.73101 116.440   1
   1   9 -28 118.137 98.2587   5
  -1  -9 -27 570.310 203.316   1
   1   9 -27 830.783 209.153   5
  -1  -9 -26 58.7758 84.5233   1
   1   9 -26 353.443 144.780   5
  -1  -9 -25 251.525 153.485   1
   1   9 -25 309.355 123.490   5
  -1  -9 -24 136.968 168.652   1
   1   9 -24 85.1346 68.7947   5
  -1  -9 -23 17.6107 106.019   1
   1   9 -23-10.5707 91.5198   5
   1   9 -22 438.361 146.913   5
  -1   9  22 230.419 105.521   5
   1   9 -21 520.746 165.323   5
  -1   9  21 509.782 141.771   5
   1   9 -20 935.395 212.141   5
  -1   9  20 1094.28 218.626   5
   1   9 -19 207.338 131.449   5
  -1   9  19 128.936 98.1913   5
   1   9 -18 845.699 198.496   5
  -1   9  18 714.653 175.761   5
   1   9 -17 222.464 116.175   5
  -1   9  17 101.252 52.7730   5
   1   9 -16 297.714 49.6054   2
   1   9 -16 207.902 104.578   5
  -1   9  16 339.743 126.537   5
   1   9 -15 527.448 60.5666   2
   1   9 -15 632.091 167.213   5
  -1   9  15 847.857 186.174   5
   1   9 -14 260.253 144.547   5
  -1   9  14 92.6243 83.1320   5
   1   9 -14 128.195 32.9581   2
   1   9 -13 3232.19 136.418   2
   1   9 -13 4056.92 413.804   5
  -1   9  13 4162.12 404.068   5
   1   9 -12 664.899 197.377   5
  -1   9  12 365.064 129.927   5
   1   9 -12 312.029 44.5715   2
   1   9 -11 2808.12 115.178   2
   1   9 -11 3178.08 361.810   5
  -1   9  11 2659.38 319.131   5
   1   9 -10 704.594 55.5716   2
  -1   9  10 509.968 142.358   5
   1   9 -10 665.353 195.370   5
   1   9  -9 1572.86 78.2796   2
   1   9  -9 1856.82 277.543   5
  -1   9   9 1635.52 250.131   5
   1   9  -8 3291.78 105.979   2
   1   9  -8 3885.28 397.130   5
  -1   9   8 3376.56 354.319   5
  -1   9   7 1546.90 242.909   5
   1   9  -7 1690.55 262.814   5
   1   9  -7 1563.66 70.5499   2
  -1   9   6 1273.61 216.966   5
   1   9  -6 1232.30 227.344   5
   1   9  -6 1388.80 64.7135   2
   1   9  -5 1586.88 76.0397   2
  -1   9   5 1980.24 271.929   5
   1   9  -5 1640.87 254.723   5
   1   9  -5 1797.57 69.9922   2
  -1   9   4 125.946 73.0808   5
   1   9  -4 93.5635 30.9382   2
   1   9  -3 1977.40 77.9319   2
  -1   9   3 2031.51 268.173   5
   1   9  -3 2285.05 297.119   5
   1   9  -3 1937.30 77.0815   2
   1   9  -2 288.322 42.9229   2
   1   9  -2 356.433 129.707   5
  -1   9   2 309.465 115.349   5
   1   9  -1 762.068 49.7855   2
   1   9  -1 806.158 174.126   5
  -1   9   1 711.860 155.979   5
   1   9   0 438.251 41.5259   2
   1   9   0 476.469 136.406   5
  -1   9   0 463.144 137.768   5
   1   9   1 721.743 52.0270   2
  -1   9  -1 645.705 157.848   5
   1   9   1 773.807 178.898   5
  -1   9  -2 187.119 99.6574   5
   1   9   2 83.3934 84.9134   5
   1   9   2 229.369 35.0940   2
   1   9   3 1935.16 93.2640   2
  -1   9  -3 2065.98 273.401   5
   1   9   3 2236.26 299.277   5
   1   9   4 154.945 35.6411   2
  -1   9  -4 4.53505 62.9613   5
   1   9   4 118.097 96.7160   5
   1   9   5 1816.54 99.1075   2
   1   9   5 2095.52 292.863   5
  -1   9  -5 1803.45 266.165   5
   1  -9  -5 1798.81 167.419   4
   1   9   6 1388.78 91.0060   2
  -1   9  -6 1334.48 231.590   5
   1   9   6 1497.55 249.949   5
   1  -9  -6 1314.30 150.410   4
   1   9   7 1700.50 106.227   2
  -1   9  -7 1525.50 247.879   5
   1   9   7 1507.20 252.407   5
   1  -9  -7 1638.39 171.648   4
   1   9   8 3463.28 154.985   2
   1   9   8 3630.99 392.616   5
  -1   9  -8 3833.18 386.981   5
   1  -9  -8 3527.01 253.440   4
   1   9   9 1432.62 105.705   2
   1   9   9 1518.28 255.894   5
  -1   9  -9 1999.43 279.869   5
   1  -9  -9 1363.02 165.380   4
   1   9  10 626.133 73.9628   2
   1   9  10 756.800 188.386   5
  -1   9 -10 898.406 195.508   5
   1  -9 -10 640.511 118.786   4
  -1   9 -11 3544.42 384.714   5
   1   9  11 3017.65 359.805   5
   1  -9 -11 2919.42 246.612   4
  -1   9 -12 464.597 169.978   5
   1  -9 -12 312.056 105.185   4
   1   9  12 428.970 144.287   5
  -1   9 -13 3627.32 390.713   5
   1   9  13 3850.25 417.877   5
   1  -9 -13 3877.76 296.914   4
  -1   9 -14 224.858 128.007   5
   1   9  14 163.568 111.905   5
   1  -9 -14 201.645 82.8100   4
   1   9  15 663.716 86.1803   2
  -1   9 -15 862.969 197.576   5
   1  -9 -15 635.927 127.953   4
   1   9  15 560.232 159.356   5
   1  -9 -16 242.264 88.6051   3
   1   9  16 388.220 67.1350   2
  -1   9 -16 621.999 164.257   5
   1  -9 -16 329.227 96.6600   4
   1   9  16 554.544 169.038   5
   1  -9 -17 170.008 75.9317   3
   1   9  17 110.626 47.6905   2
  -1   9 -17 233.053 139.728   5
   1  -9 -17 254.134 86.6050   4
   1   9  17 280.212 106.920   5
   1   9  18 598.220 88.4492   2
  -1   9 -18 758.029 201.718   5
   1   9  18 623.298 169.947   5
   1  -9 -18 704.803 141.355   4
   1   9  19 289.614 70.4184   2
  -1   9 -19 280.175 131.925   5
   1   9  19 378.639 161.207   5
   1  -9 -19 212.966 87.6766   4
   1   9  20 885.611 115.051   2
  -1   9 -20 1126.60 228.489   5
   1  -9 -20 1024.94 171.082   4
   1   9  21 473.717 90.4703   2
  -1   9 -21 365.320 127.435   5
   1  -9 -21 483.642 124.069   4
   1   9  22 352.016 74.5081   2
   1  -9 -22 235.543 115.846   1
  -1   9 -22 284.519 123.478   5
   1  -9 -22 241.213 92.2663   4
   1   9  23 125.472 57.1372   2
   1  -9 -23 24.0504 98.3389   1
  -1   9 -23 56.4188 47.7084   5
   1  -9 -23 57.2723 38.5668   4
   1   9  24 118.889 42.0331   2
   1  -9 -24 205.209 95.5796   1
  -1   9 -24 222.293 126.567   5
   1  -9 -24 197.249 94.4444   4
   1   9  25 184.101 64.4076   2
   1  -9 -25 71.3718 84.2198   1
  -1   9 -25 241.139 114.704   5
   1  -9 -25 217.504 98.4613   4
   1   9  26 185.127 67.1160   2
   1  -9 -26 197.554 116.434   1
  -1   9 -26 55.0659 73.0005   5
   1  -9 -26 202.153 100.370   4
   1  -9 -27 826.366 240.313   1
   1   9  27 727.559 126.626   2
  -1   9 -27 891.503 220.098   5
   1  -9 -27 669.494 170.922   4
   1   9  28-42.6005 47.3193   2
   1  -9 -28 160.294 99.4289   1
  -1   9 -28-92.6633 105.535   5
   1  -9 -28 72.5053 88.0452   4
   1   9  29 559.106 120.936   2
   1  -9 -29 835.038 274.026   1
  -1   9 -29 963.971 239.999   5
   1  -9 -29 709.403 177.863   4
   1   9  30 191.588 90.4392   2
   1  -9 -30 140.466 139.655   1
  -1   9 -30 444.032 182.377   5
   1  -9 -30 208.345 105.570   4
   1   9  31 165.859 78.0536   2
   1  -9 -31 206.360 112.054   4
   1   9  32 60.5461 50.2455   2
   1  -9 -32 27.5298 57.4171   4
   1   9  33 16.9289 72.2764   2
   1  -9 -33 43.9282 79.1440   4
   1   9  34 16.8509 64.9867   2
   1   9  35 68.6590 77.9727   2
   1   9  36 174.548 104.440   2
   1  10 -30-40.3202 93.5037   5
   1  10 -29-17.0137 93.7799   5
   1  10 -28 121.512 94.2921   5
   1  10 -27 129.788 89.1501   5
  -1 -10 -26 36.8952 80.2170   1
   1  10 -26 17.4428 83.3166   5
  -1 -10 -25 282.621 182.599   1
   1  10 -25 557.741 185.623   5
  -1 -10 -24 512.216 237.643   1
   1  10 -24 964.961 236.056   5
   1  10 -23 81.8249 89.3574   5
   1  10 -22 586.934 180.164   5
  -1  10  22 708.595 185.100   5
   1  10 -21 162.225 110.168   5
  -1  10  21 343.578 148.314   5
   1  10 -20 206.792 103.039   5
  -1  10  20 76.1401 43.6353   5
   1  10 -19 281.007 142.496   5
  -1  10  19 76.0487 79.9020   5
   1  10 -18 448.897 158.412   5
  -1  10  18 555.885 176.328   5
   1  10 -17 943.473 224.427   5
  -1  10  17 671.822 184.132   5
   1  10 -16 1064.80 236.950   5
  -1  10  16 1211.77 239.556   5
   1  10 -15 93.2972 85.7630   5
  -1  10  15-30.4160 62.0818   5
  -1  10  14 712.695 179.650   5
   1  10 -14 778.722 202.237   5
   1  10 -13 445.575 156.568   5
  -1  10  13 174.052 105.768   5
   1  10 -12 722.362 181.592   5
  -1  10  12 803.669 194.033   5
  -1  10  11 189.431 104.745   5
   1  10 -11 100.088 98.5557   5
  -1  10  10 431.136 143.298   5
   1  10 -10 351.891 136.871   5
  -1  10   9 75.5840 70.8801   5
   1  10  -9 194.669 116.216   5
   1  10  -8 1301.43 258.485   5
  -1  10   8 1103.75 215.959   5
  -1  10   7 818.271 195.075   5
   1  10  -7 1254.16 253.880   5
  -1  10   6 918.505 197.961   5
   1  10  -6 1110.96 231.947   5
   1  10  -5 1307.71 250.966   5
  -1  10   5 1732.34 269.330   5
  -1  10   4 3.39379 69.0392   5
   1  10  -4-29.6244 53.7382   5
  -1  10   3 800.572 190.418   5
   1  10  -3 948.822 202.058   5
   1  10  -2 3.61561 65.1132   5
  -1  10   2-42.0553 70.5873   5
  -1  10   1 196.356 96.1350   5
   1  10  -1 135.766 88.2235   5
   1  10   0-73.8229 67.7351   5
  -1  10   0-39.3090 64.0953   5
  -1 -10   0 47.5880 18.0823   4
  -1  10  -1 107.617 47.6773   5
   1  10   1 37.0031 76.4116   5
   1  10   2-81.9121 71.9439   5
  -1  10  -2 7.66117 55.1228   5
   1  10   3 691.783 42.2573   2
   1  10   3 1092.72 230.972   5
  -1  10  -3 982.141 211.541   5
   1  10   4 56.3946 19.3956   2
   1  10   4 69.5799 80.0354   5
  -1  10  -4 51.7007 86.4001   5
   1  10   5 1147.33 69.6438   2
  -1  10  -5 1411.19 253.264   5
   1  10   5 1703.90 283.398   5
   1  10   6 880.309 67.3719   2
  -1  10  -6 1084.36 232.427   5
   1  10   6 939.024 206.568   5
   1 -10  -6 1120.14 139.954   4
   1  10   7 876.774 71.8963   2
   1  10   7 974.679 214.437   5
  -1  10  -7 1057.35 220.615   5
   1 -10  -7 1110.00 142.980   4
   1  10   8 862.267 74.0723   2
  -1  10  -8 1361.51 240.600   5
   1  10   8 974.752 224.474   5
   1 -10  -8 1171.21 156.136   4
   1  10   9 124.117 33.4880   2
   1  10   9 162.317 88.5177   5
  -1  10  -9 55.0690 79.5354   5
   1 -10  -9 172.680 69.3797   4
   1  10  10 384.082 53.9392   2
  -1  10 -10 606.651 170.893   5
   1  10  10 491.081 165.479   5
   1 -10 -10 341.535 93.5591   4
   1  10  11 105.117 31.9858   2
  -1  10 -11 169.675 123.887   5
   1  10  11 79.6461 74.6203   5
   1 -10 -11 89.7659 53.8547   4
  -1  10 -12 420.193 158.761   5
   1 -10 -12 782.207 135.111   4
   1  10  12 641.565 185.497   5
   1  10  13 219.962 125.744   5
   1 -10 -13 127.040 71.6000   4
  -1  10 -14 778.610 196.349   5
   1  10  14 530.800 168.494   5
   1 -10 -14 712.620 137.346   4
   1  10  15 47.7267 36.8774   2
  -1  10 -15-92.3839 88.7043   5
   1  10  15 49.6267 75.8590   5
   1 -10 -15 42.7946 44.9571   4
   1  10  16 954.209 107.204   2
  -1  10 -16 970.271 224.064   5
   1 -10 -16 1172.76 182.253   4
   1  10  16 1108.33 249.881   5
   1  10  17 687.016 95.8218   2
  -1  10 -17 516.592 172.370   5
   1  10  17 680.741 196.028   5
   1 -10 -17 675.950 141.578   4
   1  10  18 552.956 87.5604   2
  -1  10 -18 830.674 210.187   5
   1  10  18 537.196 189.754   5
   1 -10 -18 440.906 118.541   4
   1  10  19 124.165 42.2242   2
  -1  10 -19 253.174 124.981   5
   1  10  19 187.385 111.230   5
   1 -10 -19 198.198 83.7619   4
   1  10  20 91.9362 43.3259   2
  -1  10 -20 138.431 106.313   5
   1 -10 -20 60.2858 67.2780   4
   1  10  20-57.0880 88.7943   5
   1  10  21 187.538 60.7925   2
  -1  10 -21 312.972 150.851   5
   1 -10 -21 320.981 110.609   4
   1  10  22 695.428 111.140   2
  -1  10 -22 1008.58 255.871   5
   1 -10 -22 715.256 163.426   4
   1 -10 -23 8.16364 81.2621   1
   1  10  23 15.6489 25.1775   2
  -1  10 -23 12.3485 80.6109   5
   1 -10 -23 158.675 84.5442   4
   1  10  24 579.545 110.034   2
   1 -10 -24 796.012 243.659   1
  -1  10 -24 804.286 215.675   5
   1 -10 -24 556.066 154.545   4
   1  10  25 238.130 70.8302   2
   1 -10 -25 241.480 135.459   1
  -1  10 -25 622.612 214.991   5
   1 -10 -25 605.684 157.231   4
   1  10  26 110.821 58.1808   2
   1 -10 -26 314.833 178.550   1
  -1  10 -26 194.241 122.575   5
   1 -10 -26 165.765 101.989   4
   1  10  27 173.728 71.5044   2
   1 -10 -27 38.9594 88.0699   1
   1 -10 -27 317.031 126.556   4
   1  10  28 138.044 60.8330   2
   1 -10 -28 186.921 123.696   4
   1  10  29-12.9895 35.6083   2
   1 -10 -29 12.5882 56.1447   4
   1  10  30 135.659 71.6438   2
   1 -10 -30 235.967 125.955   4
   1  10  31 7.17310 39.4373   2
   1 -10 -31 174.802 126.255   4
   1  11 -24 343.846 179.806   5
   1  11 -23 245.575 139.263   5
  -1  11  23 289.770 154.744   5
   1  11 -22 42.9441 62.3715   5
  -1  11  22-188.833 116.856   5
   1  11 -21 225.223 129.891   5
  -1  11  21 76.4871 86.2398   5
   1  11 -20 189.299 122.272   5
  -1  11  20-172.874 107.949   5
   1  11 -19 4.60631 81.2546   5
  -1  11  19 344.685 148.688   5
   1  11 -18 175.380 124.218   5
  -1  11  18 6.49282 54.9770   5
   1  11 -17 218.014 95.6561   5
  -1  11  17 414.923 177.249   5
   1  11 -16 85.3842 88.9237   5
  -1  11  16 138.456 106.567   5
  -1  11  15 172.667 112.456   5
   1  11 -15 140.917 115.004   5
  -1  11  14 701.479 201.092   5
   1  11 -14 754.116 212.455   5
   1  11 -13 54.2243 88.2972   5
  -1  11  13 149.630 111.060   5
  -1  11  12 25.0518 82.7503   5
   1  11 -12 151.139 121.981   5
   1  11 -11 90.1377 81.6194   5
  -1  11  11 57.3203 74.1415   5
  -1  11  10 386.905 145.301   5
   1  11 -10 692.502 203.270   5
  -1  11   9 667.898 188.266   5
   1  11  -9 596.275 165.465   5
  -1  11   8 733.609 193.641   5
   1  11  -8 927.516 220.361   5
  -1  11   7 327.243 137.921   5
   1  11  -7 442.162 174.245   5
   1  11  -6 970.070 238.927   5
  -1  11   6 413.905 142.714   5
   1  11  -5 714.614 205.044   5
  -1  11   5 308.581 125.120   5
  -1  11   4 371.251 143.954   5
   1  11  -4 313.482 129.339   5
  -1  11   3 163.407 108.886   5
   1  11  -3 391.360 144.923   5
  -1  11   2 593.024 176.618   5
   1  11  -2 106.661 85.7413   5
   1  11  -1 317.411 141.206   5
  -1  11   1 181.124 83.2982   5
  -1  11   0 112.867 99.1095   5
   1  11   0 28.7442 65.2114   5
   1  11   1 156.235 99.0959   5
  -1  11  -1 372.531 141.751   5
   1  11   2 423.314 154.991   5
  -1  11  -2 347.759 147.172   5
   1  11   3 226.260 128.776   5
  -1  11  -3 183.205 112.938   5
   1  11   4 499.244 166.800   5
  -1  11  -4 332.763 144.430   5
  -1  11  -5 406.474 148.621   5
   1  11   5 547.850 169.021   5
   1  11   6 363.449 144.384   5
  -1  11  -6 467.098 154.948   5
   1  11   7 464.080 160.254   5
  -1  11  -7 354.199 132.071   5
  -1  11  -8 682.262 187.011   5
   1  11   8 784.309 214.607   5
  -1  11  -9 863.471 214.856   5
   1  11   9 875.357 228.413   5
  -1  11 -10 655.866 189.479   5
   1  11  10 717.766 198.604   5
  -1  11 -11 97.7026 81.5005   5
   1 -11 -11 63.7500 32.9428   4
   1  11  11-85.4681 86.9443   5
  -1  11 -12 131.954 79.6380   5
   1 -11 -12 38.1495 49.2469   4
   1  11  12 152.134 114.685   5
  -1  11 -13 396.251 167.237   5
   1  11  13 233.329 117.033   5
   1 -11 -13 127.778 64.2210   4
  -1  11 -14 477.266 171.052   5
   1  11  14 491.196 176.925   5
   1 -11 -14 354.569 100.920   4
  -1  11 -15 17.7578 71.0041   5
   1  11  15 50.3825 80.6459   5
   1 -11 -15 31.8233 42.8979   4
  -1  11 -16 131.383 91.6299   5
   1 -11 -16 50.3344 50.7263   4
   1  11  16 134.350 94.3319   5
  -1  11 -17 187.225 108.304   5
   1  11  17 232.860 122.547   5
   1 -11 -17 43.9415 41.0660   4
  -1  11 -18 68.2647 85.3476   5
   1  11  18 52.5397 87.5415   5
   1 -11 -18 228.732 94.8632   4
  -1  11 -19 209.455 125.778   5
   1  11  19 228.632 125.544   5
   1 -11 -19 242.588 96.5950   4
  -1  11 -20 167.094 110.167   5
   1  11  20 223.818 145.667   5
   1 -11 -20 15.7764 60.8985   4
  -1  11 -21-52.7100 90.1201   5
   1 -11 -21 10.9975 45.0827   4
   1 -11 -22 20.1695 46.4260   4
   1 -11 -23 165.036 111.844   4
   1 -11 -24 368.205 138.369   4
   1 -11 -25-32.4289 58.9392   4
   1 -11 -26 468.662 171.831   4
   1 -11 -27 16.9360 104.145   4
   1 -11 -28-169.825 101.822   4
   1 -11 -29 41.3719 83.4285   4
  -1  12  23 32.1257 129.655   5
  -1  12  22-74.8305 93.8139   5
  -1  12  21 0.63382 148.883   5
  -1  12  20 116.824 110.582   5
  -1  12  19 79.6799 132.182   5
  -1  12  18 211.986 141.564   5
  -1  12  17 138.120 116.043   5
  -1  12  16 171.353 129.608   5
   1  12 -15 60.3029 93.8153   5
  -1  12  15 249.714 143.222   5
  -1  12  14 167.131 116.705   5
   1  12 -14 147.849 116.823   5
  -1  12  13 171.726 133.015   5
   1  12 -13 407.022 173.902   5
  -1  12  12 373.436 160.854   5
   1  12 -12 240.761 142.844   5
  -1  12  11 15.5030 66.4466   5
   1  12 -11 267.162 151.316   5
  -1  12  10 28.4520 67.8155   5
   1  12 -10 379.282 158.091   5
   1  12  -9 345.004 161.116   5
  -1  12   9 472.992 159.332   5
   1  12  -8 186.164 116.314   5
  -1  12   8 141.805 93.3152   5
  -1  12   7-72.6985 103.370   5
   1  12  -7 211.173 136.655   5
   1  12  -6 415.937 171.638   5
  -1  12   6 263.054 126.800   5
  -1  12   5-85.8588 90.4797   5
   1  12  -5-38.1577 59.8376   5
   1  12  -4 47.9830 96.4073   5
  -1  12   4 80.5000 80.9001   5
  -1  12   3 320.519 156.670   5
   1  12  -3 79.1156 77.7324   5
  -1  12   2 1230.69 269.107   5
   1  12  -2 1121.30 258.578   5
  -1  12   1 1229.12 270.152   5
   1  12  -1 1248.80 277.721   5
   1  12   0 784.864 222.474   5
  -1  12   0 636.334 194.890   5
   1  12   1 890.318 235.686   5
  -1  12  -1 1009.03 249.008   5
   1  12   2 574.223 203.460   5
  -1  12  -2 768.747 219.847   5
   1  12   3 296.462 152.875   5
  -1  12  -3 174.209 126.032   5
  -1  12  -4 10.0461 50.4559   5
   1  12   4 217.736 137.151   5
   1  12   5-89.8904 71.8759   5
  -1  12  -5 220.457 119.890   5
   1  12   6 422.476 165.911   5
  -1  12  -6 61.5330 71.1448   5
   1  12   7-39.5209 71.4394   5
  -1  12  -7 91.0342 99.8104   5
   1  12   8 190.790 137.471   5
  -1  12  -8 225.564 114.254   5
  -1  12  -9 236.737 130.884   5
   1  12   9 305.002 135.254   5
  -1  12 -10 170.119 123.720   5
   1  12  10 17.1573 56.4081   5
  -1  12 -11 200.874 122.604   5
   1  12  11 291.954 147.806   5
  -1  12 -12 238.447 124.155   5
   1  12  12 74.4032 105.230   5
  -1  12 -13 8.52340 62.6262   5
   1  12  13-78.5181 101.295   5
  -1  12 -14 119.279 118.477   5
   1  12  14 214.367 128.674   5
   1  12  15 142.093 132.653   5
   1  12  16-0.66457 76.8684   5
  -1  13   9-48.9734 115.758   5
  -1  13   8 97.2389 112.552   5
  -1  13   7-35.0609 82.6111   5
  -1  13   6-96.6427 95.7153   5
  -1  13   5 127.377 93.6752   5
  -1  13   4 120.290 120.626   5
  -1  13   3 541.414 201.538   5
  -1  13   2-22.3485 63.4369   5
  -1  13   1 0.62233 70.7877   5
   2   0   0 17143.4 516.052   3
   2   0  -1 19739.7 558.732   3
   2   0   1 19495.4 549.527   3
  -2   0  -2 11.8881 36.6420   3
   2   0   2 48.5341 47.7864   3
   2   0  -2 80.7969 47.1319   3
  -2   0   3 2221.46 89.8892   1
  -2   0   3 2252.33 108.749   5
   2   0  -3 2150.00 186.015   3
  -2   0  -3 2299.41 186.270   3
   2   0   3 2285.39 187.483   3
  -2   0   4 3791.95 137.792   1
  -2   0   4 3932.94 128.908   5
   2   0   4 3845.34 240.891   3
   2   0  -4 4009.22 252.390   3
  -2   0   4 3799.45 250.549   3
  -2   0  -4 3931.34 242.868   3
  -2   0   5 82.3606 59.4327   3
  -2   0  -5-22.3073 35.3485   3
   2   0   5 34.0587 36.9171   3
  -2   0   5 11.8910 20.3440   1
  -2   0   5 1.41370 10.7279   5
   2   0  -5-14.5272 29.2944   3
  -2   0   5 44.9917 36.9966   4
   2   0   6 1045.86 90.6847   1
  -2   0   6 1051.71 91.5138   1
  -2   0   6 1094.18 128.699   4
   2   0  -6 1190.16 141.741   3
   2   0   6 1096.10 127.833   3
  -2   0   6 1111.03 138.406   3
  -2   0  -6 1172.84 129.402   3
   2   0   7 677.929 79.2915   1
  -2   0   7 624.049 78.5218   1
  -2   0  -7 678.035 98.7169   3
  -2   0   7 609.089 99.1257   3
   2   0   7 585.979 95.3043   3
  -2   0   7 542.298 90.0503   4
   2   0  -7 548.150 97.3804   3
   2   0   8 146.093 38.7672   1
  -2   0   8 225.809 53.3798   1
  -2   0  -8 160.647 52.3814   3
   2   0   8 133.705 54.3965   3
  -2   0   8 199.665 66.3274   3
   2   0  -8 173.278 59.6468   3
  -2   0   8 132.898 47.8632   4
  -2   0   9 9.42235 21.2014   1
   2   0   9-10.9309 25.2654   1
  -2   0  -9-44.9045 39.3715   3
   2   0   9-1.94970 23.7997   3
  -2   0   9 38.4459 35.2508   3
  -2   0   9-19.8440 22.8814   4
   2   0  -9-0.94937 26.0359   3
  -2   0  10 227.184 61.2944   1
   2   0  10 259.820 60.6056   1
  -2   0  10 279.578 77.6341   3
   2   0  10 262.709 76.0023   3
  -2   0 -10 204.177 53.5851   3
  -2   0  10 263.924 65.7590   4
   2   0 -10 302.627 71.4379   3
   2   0  11 1415.97 145.761   1
  -2   0  11 1440.69 149.082   1
  -2   0 -11 1722.44 150.612   3
  -2   0  11 1676.87 173.351   3
  -2   0  11 1602.57 154.660   4
   2   0  11 1554.75 154.411   3
   2   0  12 5341.71 294.984   1
  -2   0  12 5360.53 292.803   1
  -2   0 -12 5184.52 257.282   3
  -2   0  12 5795.58 320.718   3
  -2   0  12 5341.02 280.485   4
   2   0  12 5655.55 292.931   3
  -2   0 -13 15358.2 434.491   3
   2   0  13 14974.8 515.894   1
  -2   0  13 14971.6 509.090   1
   2   0 -13 15587.0 216.903   5
  -2   0  13 15199.2 475.340   4
  -2   0  13 15525.0 525.590   3
   2   0  13 15603.9 484.726   3
  -2   0 -14 15463.4 429.387   3
   2   0  14 15116.8 542.470   1
  -2   0  14 15281.9 534.259   1
   2   0 -14 16019.7 255.285   5
  -2   0  14 15988.3 533.981   3
  -2   0  14 15569.3 481.776   4
   2   0  14 15296.2 482.092   3
  -2   0 -15 2925.24 183.641   3
   2   0 -15 3176.61 224.383   2
   2   0  15 3165.32 258.766   1
  -2   0  15 3074.66 250.623   1
   2   0 -15 3086.04 126.475   5
  -2   0  15 3415.61 254.138   3
   2   0  15 3418.64 230.947   3
  -2   0  15 3036.75 211.614   4
   2   0 -16 8444.51 352.350   2
   2   0  16 8054.10 426.552   1
  -2   0  16 8746.81 433.775   1
  -2   0 -16 8122.23 300.472   3
   2   0  16 7876.68 346.365   3
  -2   0  16 8292.84 388.929   3
   2   0  17 2233.41 231.791   1
   2   0 -17 1983.75 171.391   2
  -2   0  17 2249.65 227.698   1
  -2   0 -17 2178.55 153.251   3
   2   0 -17 2238.78 230.026   4
  -2   0  17 2273.35 209.288   3
   2   0  17 2345.07 190.191   3
   2   0 -18 1540.30 153.722   2
   2   0  18 1657.14 204.665   1
  -2   0  18 1620.36 200.892   1
  -2   0 -18 1596.97 128.823   3
  -2   0  18 1815.17 185.530   3
   2   0  18 1783.29 165.093   3
   2   0 -18 1829.56 206.777   4
   2   0 -19 3515.48 231.655   2
   2   0  19 3653.38 313.134   1
  -2   0  19 4072.74 323.310   1
   2   0  19 3426.53 228.510   2
  -2   0 -19 3418.85 180.324   3
   2   0  19 3594.06 234.873   3
   2   0 -19 3472.47 287.776   4
  -2   0  19 3731.79 263.911   3
   2   0 -20 420.358 82.1862   2
   2   0  20 469.467 85.3634   2
  -2   0  20 382.819 110.013   1
   2   0  20 387.180 101.088   1
  -2   0  20 404.977 89.3974   3
   2   0  20 376.162 76.0112   3
  -2   0 -20 345.633 60.3566   3
   2   0 -20 443.211 112.393   4
   2   0 -21 652.928 106.674   2
   2   0  21 709.937 108.572   2
  -2   0  21 910.382 163.120   1
   2   0  21 908.560 171.333   1
   2   0  21 707.089 106.292   3
  -2   0  21 702.931 123.130   3
  -2   0 -21 769.320 83.5268   3
   2   0 -21 769.324 162.302   4
   2   0 -22 4119.78 257.139   2
   2   0  22 4283.89 369.876   1
  -2   0  22 4029.45 357.711   1
   2   0  22 4017.67 257.680   2
  -2   0  22 3820.65 275.208   3
   2   0 -22 3900.98 324.543   4
   2   0  22 3908.50 241.603   3
   2   0  23 2256.12 281.503   1
  -2   0  23 2028.43 257.367   1
   2   0  23 2043.14 185.377   2
   2   0 -23 2139.52 249.474   4
  -2   0  23 2075.28 203.141   3
   2   0  23 2074.21 176.757   3
   2   0  24 279.545 69.5236   2
  -2   0  24 230.226 88.8210   1
   2   0  24 198.386 92.0959   1
  -2   0  24 285.392 79.1905   3
   2   0  24 279.729 68.2519   3
   2   0 -24 393.982 113.408   4
  -2   0  25-80.6649 73.1689   1
   2   0  25 8.01213 23.6275   2
   2   0  25 73.1026 72.3410   1
   2   0  25 3.74299 22.7428   3
  -2   0  25-3.21663 32.1938   3
   2   0 -25 53.5495 60.5542   4
   2   0  26 1744.72 175.995   2
   2   0 -26 1948.02 249.563   4
   2   0  26 1456.28 147.307   3
   2   0  27 412.381 85.4892   2
   2   0  27 285.003 67.1869   3
   2   0 -27 470.234 135.458   4
   2   0  28 2206.76 212.883   2
   2   0 -28 2770.99 312.367   4
   2   0  28 2265.36 179.125   3
   2   0  29 4058.38 285.529   2
   2   0 -29 4327.34 395.024   4
   2   0  29 4049.95 232.880   3
   2   0  30 903.535 139.623   2
   2   0  30 771.268 98.6565   3
   2   0 -30 1144.23 218.186   4
   2   0  31 1010.71 149.595   2
   2   0  31 776.681 97.2878   3
   2   0 -31 1047.62 208.325   4
   2   0  32 1532.55 185.813   2
   2   0  32 1365.29 120.032   3
   2   0 -32 1775.09 266.735   4
   2   0  33 438.948 103.741   2
   2   0 -33 509.058 149.073   4
   2   0  34 568.026 117.551   2
   2   0 -34 473.880 132.516   4
   2   0  35 382.129 101.720   2
  -2   0  35 301.483 77.0089   3
   2   0 -35 234.951 111.748   4
   2   0  36 470.939 112.687   2
   2   0 -36 420.726 143.667   4
   2   0  37 116.488 59.5720   2
   2   0 -37 27.6221 61.6394   4
   2   0  38 105.306 62.7671   2
   2   0 -38 51.0926 78.5951   4
   2   0  39 286.923 97.3097   2
   2   0 -39 385.062 141.253   4
   2   0  40 439.861 117.250   2
   2   0 -40 240.787 121.754   4
   2   0  41 1270.05 199.680   2
   2   0 -41 1560.91 282.852   4
   2   0 -42 327.871 151.514   4
   2   1 -43 81.0260 104.926   4
   2   1 -42 529.003 174.152   4
   2  -1  41 370.022 119.353   2
   2   1 -41 336.969 153.136   4
   2  -1  40 218.904 90.9650   2
   2   1 -40 244.115 128.762   4
   2  -1  39 297.325 97.0208   2
   2   1 -39 456.224 156.982   4
   2  -1  38 153.931 72.4268   2
   2   1 -38 130.831 90.8739   4
   2  -1  37 39.1715 47.5185   2
   2   1 -37 37.0915 49.7603   4
   2  -1  36 476.485 113.297   2
   2   1 -36 540.657 154.674   4
   2  -1  35 988.150 158.632   2
   2   1 -35 970.604 210.253   4
   2  -1  34 542.689 120.129   2
  -2   1  34 463.172 83.5987   3
   2   1 -34 733.401 178.960   4
   2  -1  33 315.542 89.5313   2
  -2   1  33 205.347 55.7799   3
   2   1 -33 363.703 131.374   4
   2  -1  32 810.788 129.698   2
   2  -1  32 878.037 128.389   3
  -2   1  32 869.823 118.902   3
   2   1 -32 919.605 191.186   4
   2  -1  31 2268.28 217.094   2
   2   1 -31 3004.03 331.649   4
  -2   1  31 2605.66 204.572   3
   2  -1  31 2588.60 216.638   3
   2  -1  30 1003.76 141.505   2
  -2   1  30 856.488 120.040   3
   2  -1  30 1014.60 137.864   3
   2   1 -30 1038.83 199.442   4
   2  -1  29 254.549 71.8222   2
   2  -1  29 192.584 62.4525   3
  -2   1  29 260.968 68.2723   3
   2   1 -29 132.113 76.4693   4
   2  -1  28 183.087 74.6899   2
  -2   1  28 364.667 82.7319   3
   2  -1  28 202.241 69.3615   3
   2   1 -28 242.635 100.847   4
   2  -1  27 3874.44 267.084   2
  -2   1  27 3646.47 252.880   3
   2  -1  27 3773.37 264.949   3
   2   1 -27 4303.93 368.140   4
   2  -1  26 4722.73 287.982   2
  -2   1  26 4154.64 271.013   3
   2   1 -26 5129.67 396.944   4
   2  -1  26 4470.55 289.499   3
  -2   1  25 3485.74 365.244   1
   2  -1  25 3786.78 373.053   1
   2  -1  25 3484.88 248.241   2
  -2   1  25 3318.73 243.932   3
   2   1 -25 3529.77 322.942   4
   2  -1  25 3217.77 243.782   3
  -2   1  24 180.260 69.5231   1
   2  -1  24 589.009 105.373   2
   2  -1  24 158.519 69.9574   1
   2  -1  24 346.038 84.8047   3
  -2   1  24 296.056 77.6725   3
   2   1 -24 606.449 138.423   4
  -2   1  23 881.997 179.136   1
   2  -1  23 1022.99 191.080   1
  -2  -1 -23 933.124 81.0617   3
   2  -1  23 1113.07 137.161   2
   2   1 -23 1054.63 170.962   4
   2  -1  23 1098.03 142.359   3
  -2   1  23 1032.00 137.684   3
   2   1 -22 3133.89 226.545   2
  -2   1  22 3191.30 330.286   1
   2  -1  22 3249.16 320.032   1
   2  -1  22 3451.72 234.474   2
  -2  -1 -22 3158.60 155.711   3
   2   1 -22 3545.36 304.229   4
   2  -1  22 3172.53 240.853   3
  -2   1  22 3273.77 243.621   3
   2   1 -21 3299.79 227.287   2
  -2   1  21 3228.45 323.688   1
   2  -1  21 3399.78 325.375   1
   2  -1  21 3184.56 221.012   2
  -2  -1 -21 3237.92 163.627   3
   2  -1  21 3068.99 233.775   3
  -2   1  21 3391.22 244.728   3
   2   1 -21 3467.25 290.635   4
   2  -1  20 350.680 84.3919   3
  -2   1  20 298.152 83.9583   3
  -2  -1 -20 233.115 47.7978   3
   2   1 -20 247.782 68.0083   2
   2  -1  20 310.668 98.7647   1
  -2   1  20 179.966 77.7211   1
   2  -1  20 278.665 75.4576   2
   2   1 -20 230.883 53.2809   5
   2   1 -20 262.623 100.174   4
   2  -1  19 4540.77 258.189   2
  -2  -1 -19 4359.17 206.014   3
   2   1 -19 4616.20 270.408   2
  -2   1  19 4073.60 338.796   1
   2  -1  19 4789.29 356.822   1
   2   1 -19 4700.01 229.160   5
   2  -1  19 4504.78 279.416   3
   2   1 -19 4177.74 313.089   4
  -2   1  19 4153.26 269.685   3
  -2  -1 -18 1863.01 139.346   3
   2  -1  18 1724.80 157.917   2
   2   1 -18 1719.63 163.280   2
  -2   1  18 1644.73 210.318   1
   2  -1  18 1687.96 212.868   1
   2   1 -18 1823.82 139.630   5
   2   1 -18 1799.45 207.684   4
   2  -1  18 1753.49 175.081   3
  -2   1  18 1721.71 176.157   3
  -2  -1 -17 2176.27 155.915   3
   2  -1  17 1941.74 165.699   2
   2   1 -17 1973.83 180.143   2
  -2   1  17 2085.97 231.038   1
   2  -1  17 2251.29 237.030   1
   2   1 -17 1984.63 136.942   5
  -2   1  17 1972.29 185.683   3
   2  -1  17 1876.38 179.258   3
   2  -1  16 392.176 85.9515   3
  -2   1  16 319.357 84.6189   3
  -2  -1 -16 313.613 65.7453   3
   2  -1  16 215.996 59.1659   2
  -2   1  16 234.886 80.4662   1
   2   1 -16 144.444 65.5386   2
   2  -1  16 331.589 91.2359   1
   2   1 -16 335.012 56.3431   5
  -2  -1 -15 7103.85 291.760   3
   2  -1  15 7167.08 310.910   2
   2  -1  15 7310.56 384.883   1
  -2   1  15 6939.99 383.639   1
   2   1 -15 7138.32 239.212   5
  -2   1  15 6928.45 343.853   3
   2  -1  15 6879.44 342.367   3
  -2  -1 -14 7135.15 298.833   3
   2  -1  14 6939.09 302.205   2
   2  -1  14 7228.68 373.617   1
  -2   1  14 7315.11 387.458   1
   2   1 -14 7539.16 233.678   5
  -2   1  14 7209.00 324.809   4
  -2   1  14 7531.65 357.985   3
   2  -1  14 7429.37 353.758   3
   2  -1  13 4521.83 244.449   2
  -2   1  13 4863.13 299.332   1
   2   1 -13 5257.60 185.124   5
  -2   1  13 4950.54 290.108   3
  -2  -1 -13 4535.05 243.118   3
  -2   1  13 4601.93 262.125   4
   2  -1  13 5135.98 290.864   3
   2  -1  12 1497.47 140.624   2
  -2   1  12 1481.46 160.684   1
   2   1 -12 1552.16 95.4420   5
  -2   1  12 1674.07 169.492   3
  -2   1  12 1351.30 143.017   4
  -2  -1 -12 1439.82 138.143   3
   2  -1  12 1608.88 163.090   3
  -2   1  11 2327.35 193.052   1
  -2  -1 -11 2715.26 204.599   1
   2   1 -11 2426.74 117.794   5
  -2  -1 -11 2080.49 170.279   3
  -2   1  11 2304.81 185.473   4
   2   1 -11 1992.94 193.615   4
   2  -1  11 2445.57 201.271   3
  -2   1  11 2224.54 192.354   3
  -2   1  10 1926.00 169.372   1
  -2  -1 -10 1927.88 166.128   1
   2   1 -10 2081.34 107.102   5
  -2   1  10 1995.23 172.525   4
   2  -1  10 1904.57 176.735   3
  -2   1  10 2146.10 192.812   3
  -2  -1 -10 2137.28 171.290   3
  -2  -1  -9 10378.9 365.718   1
   2   1  -9 10319.2 233.445   5
   2  -1   9 10063.2 405.906   3
  -2   1   9 10318.2 392.034   4
  -2  -1  -9 10658.4 392.037   3
  -2   1   9 10359.2 409.633   3
  -2  -1  -8 3397.84 201.139   1
   2   1  -8 2967.10 124.159   5
  -2  -1  -8 3154.60 215.193   3
   2  -1   8 2948.91 221.947   3
  -2   1   8 3042.74 214.062   4
  -2   1   8 3685.08 245.365   3
  -2  -1  -7 10777.7 336.191   1
   2   1  -7 10487.6 241.407   5
  -2   1   7 10086.6 388.038   4
  -2   1   7 10268.0 406.184   3
   2  -1   7 10340.1 408.009   3
  -2  -1  -7 10080.3 386.647   3
  -2  -1  -6 10232.0 310.877   1
   2   1  -6 10071.0 244.581   5
  -2   1   6 9470.61 375.608   4
  -2   1   6 10078.0 403.262   3
  -2  -1  -6 10444.6 393.247   3
   2  -1   6 10017.8 404.818   3
  -2  -1  -5 15531.1 363.750   1
   2   1  -5 15265.7 311.496   5
  -2   1   5 14760.6 483.055   3
   2  -1   5 14957.9 489.097   3
  -2  -1  -5 15627.8 484.319   3
  -2   1   5 15053.3 473.530   4
  -2  -1  -4 11860.5 303.510   1
   2   1  -4 12335.5 300.722   5
   2  -1   4 12439.0 446.651   3
  -2  -1  -4 12267.5 432.431   3
  -2   1   4 11736.8 422.002   4
  -2   1   4 12078.9 436.718   3
  -2  -1  -3 524.452 93.8663   3
  -2   1   3 472.046 99.2925   3
   2  -1   3 414.936 90.9745   3
  -2  -1  -3 565.139 88.1334   5
  -2  -1  -2 4578.38 229.802   5
   2  -1   2 4548.19 270.548   3
  -2  -1  -2 4402.07 266.929   3
   2  -1   1 522.551 95.5349   3
  -2  -1  -1 666.842 85.8448   5
  -2  -1  -1 795.077 118.709   3
   2   1  -1 651.599 102.171   3
  -2  -1   0 3969.34 196.036   5
   2  -1   0 3725.92 248.797   3
   2   1   0 3773.05 235.050   3
   2  -1  -1 661.227 108.061   3
  -2  -1   1 602.850 74.5673   5
   2   1   1 598.875 99.2609   3
   2  -1  -2 4154.93 118.999   1
  -2  -1   2 4286.19 185.766   5
   2   1   2 4165.29 247.896   3
   2  -1  -2 3994.00 261.149   3
   2  -1  -3 376.731 83.7129   3
  -2   1  -3 397.427 79.8692   3
   2  -1  -3 542.165 48.6571   1
  -2  -1   3 334.817 51.6626   5
   2   1   3 581.666 96.4629   3
  -2   1  -4 12136.3 412.958   3
   2  -1  -4 12066.9 258.444   1
  -2  -1   4 11725.1 282.476   5
   2   1   4 12092.5 423.055   3
   2  -1  -4 11455.4 434.815   3
  -2   1  -5 15018.7 461.034   3
  -2  -1   5 14323.6 298.409   5
   2   1   5 14898.8 468.682   3
   2  -1  -5 15271.9 500.096   3
  -2   1  -6 9694.28 368.264   3
  -2  -1   6 10025.6 240.695   5
  -2  -1   6 10309.9 397.611   4
   2  -1  -6 9946.48 407.697   3
   2   1   6 9951.96 378.549   3
  -2   1  -7 10750.4 383.003   3
  -2  -1   7 10642.2 241.162   5
  -2  -1   7 10658.1 405.353   4
   2   1   7 10697.1 393.336   3
  -2  -1   7 10560.6 427.082   3
   2  -1  -7 10309.3 415.860   3
  -2   1  -8 2748.80 194.375   3
  -2  -1   8 2944.04 124.182   5
  -2  -1   8 2946.29 208.681   4
   2   1   8 3594.29 227.976   3
  -2  -1   8 3262.55 248.541   3
   2  -1  -8 3677.75 247.896   3
  -2   1  -9 9934.92 362.959   3
  -2  -1   9 9895.94 387.422   4
   2   1   9 10218.7 376.632   3
  -2  -1   9 10261.3 422.821   3
   2  -1  -9 10488.4 417.894   3
  -2   1 -10 1801.97 150.505   3
  -2  -1  10 1732.56 161.626   4
  -2  -1  10 2182.06 202.126   3
   2   1  10 2255.79 179.822   3
   2  -1 -10 1957.19 183.091   3
  -2   1 -11 2495.71 178.184   3
  -2  -1  11 2491.31 214.871   3
   2   1  11 2210.30 174.344   3
   2  -1 -11 2345.87 204.127   3
  -2  -1  11 2495.92 193.510   4
  -2   1 -12 1636.37 143.380   3
  -2  -1  12 1591.95 155.389   4
   2  -1 -12 1498.38 160.900   3
   2   1  12 1586.47 148.302   3
  -2  -1  12 1765.17 183.050   3
  -2   1 -13 4741.77 240.480   3
   2  -1 -13 4499.14 271.453   3
  -2  -1  13 4988.04 271.329   4
  -2  -1  13 5556.49 320.726   3
   2   1  13 4581.51 250.176   3
  -2   1 -14 7490.40 296.915   3
   2  -1 -14 6891.76 321.964   2
   2  -1 -14 7350.20 146.794   5
  -2  -1  14 7268.06 324.469   4
  -2  -1  14 7631.37 378.415   3
   2  -1 -14 6982.02 341.389   3
   2   1  14 7152.91 312.055   3
  -2   1 -15 6975.10 281.498   3
   2  -1 -15 7408.35 324.491   2
   2  -1 -15 6902.02 167.272   5
   2   1  15 6942.13 306.417   3
  -2  -1  15 6685.98 312.371   4
   2  -1 -15 6944.24 334.374   3
  -2  -1  15 6927.69 362.739   3
  -2   1 -16 264.247 58.4892   3
   2  -1 -16 213.065 62.5184   2
   2  -1 -16 320.732 41.8022   5
  -2  -1  16 410.772 101.474   3
   2   1  16 359.396 69.5964   3
  -2   1 -17 2087.39 150.489   3
   2  -1 -17 2078.79 172.883   2
   2   1  17 1836.88 219.922   1
   2  -1 -17 1889.23 107.833   5
   2   1  17 1871.74 160.084   3
  -2  -1  17 2204.72 210.547   3
  -2   1 -18 1821.06 139.508   3
   2  -1 -18 1813.36 164.176   2
   2   1  18 1860.63 225.342   1
   2  -1 -18 1830.15 116.649   5
   2   1  18 1877.36 155.956   3
  -2   1 -19 4614.92 216.465   3
   2  -1 -19 4623.88 263.913   2
   2   1  19 4731.07 368.225   1
   2  -1 -19 4584.46 195.752   5
   2   1  19 4599.59 241.643   3
   2   1  20 278.840 97.7894   1
   2  -1 -20 223.280 66.1664   2
   2   1  20 217.062 64.6888   2
   2  -1 -20 255.177 55.4293   5
   2   1  20 232.344 60.4889   3
   2  -1 -20 513.317 136.382   4
   2   1  21 3438.24 228.895   2
  -2  -1  21 3185.30 306.418   1
   2  -1 -21 3370.30 228.799   2
   2   1  21 3313.07 329.342   1
   2  -1 -21 3359.95 188.274   5
   2   1  21 3208.01 198.627   3
   2  -1 -21 3296.27 299.088   4
   2   1  22 2929.23 228.599   2
  -2  -1  22 3019.62 304.915   1
   2  -1 -22 3090.99 223.397   2
   2   1  22 2897.70 316.679   1
   2  -1 -22 3277.13 193.515   5
   2  -1 -22 3531.75 310.514   4
   2   1  22 3073.85 191.057   3
   2   1  23 1074.57 137.990   2
   2   1  23 884.112 185.666   1
  -2  -1  23 990.461 176.984   1
   2  -1 -23 937.748 108.567   5
   2   1  23 884.192 100.648   3
   2  -1 -23 1118.73 181.533   4
   2   1  24 466.813 143.243   1
  -2  -1  24 525.299 138.633   1
   2   1  24 232.946 70.0894   2
   2  -1 -24 266.631 58.4509   5
   2   1  24 331.411 62.2201   3
   2  -1 -24 540.125 146.195   4
   2   1  25 3548.09 255.192   2
   2   1  25 3151.93 359.599   1
  -2  -1  25 3734.14 362.719   1
   2  -1 -25 3370.15 223.655   5
   2  -1 -25 3788.67 350.450   4
   2   1  25 3093.70 178.367   3
   2   1  26 4303.35 281.034   2
   2  -1 -26 4287.91 258.937   5
   2  -1 -26 4515.96 394.635   4
   2   1  27 3607.60 261.723   2
   2  -1 -27 3824.29 252.119   5
   2  -1 -27 4408.54 396.474   4
   2   1  28 275.404 79.9600   2
   2  -1 -28 290.918 70.9578   5
   2  -1 -28 436.801 137.786   4
   2   1  29 278.901 79.5527   2
   2  -1 -29 199.107 99.6263   4
   2  -1 -29 220.515 62.3173   5
   2   1  30 952.011 143.783   2
   2  -1 -30 1270.33 225.291   4
   2  -1 -30 891.551 131.707   5
   2   1  31 2904.60 250.961   2
   2  -1 -31 2344.15 221.442   5
   2  -1 -31 3087.75 357.891   4
   2   1  32 1003.61 153.776   2
   2  -1 -32 993.094 148.913   5
   2  -1 -32 1095.32 216.050   4
   2   1  33 369.809 105.820   2
   2  -1 -33 280.549 117.123   4
   2   1  34 479.889 102.871   2
   2  -1 -34 602.719 177.266   4
   2   1  35 815.643 144.157   2
   2  -1 -35 1023.57 213.839   4
   2   1  36 503.490 118.940   2
   2  -1 -36 687.231 185.954   4
   2   1  37 57.1776 46.9065   2
   2  -1 -37 185.536 104.295   4
   2   1  38 214.309 87.3595   2
   2  -1 -38 173.007 85.0187   4
   2   1  39 483.928 122.017   2
   2  -1 -39 359.606 137.702   4
   2   1  40 528.070 126.785   2
   2  -1 -40 262.055 117.630   4
   2   1  41 547.941 139.195   2
   2  -1 -41 438.924 165.815   4
   2  -1 -42 524.666 197.912   4
   2   2 -44 36.6593 98.7904   4
   2   2 -43-77.1392 79.6226   4
   2   2 -42 7.46454 58.3233   4
   2  -2  41 302.376 108.582   2
   2   2 -41 198.294 100.975   4
   2  -2  40 91.7444 66.5271   2
   2   2 -40 19.6912 60.7436   4
   2  -2  39 644.692 136.991   2
   2   2 -39 541.659 160.869   4
   2  -2  38 167.568 83.4034   2
   2   2 -38 85.3533 58.7201   5
   2   2 -38-5.74823 57.7700   4
   2  -2  37 925.514 154.446   2
   2   2 -37 685.234 152.662   5
   2   2 -37 1005.49 207.315   4
   2  -2  36 362.874 101.235   2
   2   2 -36 217.797 81.3950   5
   2   2 -36 293.646 133.601   4
   2  -2  35 166.391 72.4234   2
   2   2 -35 149.695 64.7986   5
   2   2 -35 132.297 103.470   4
   2  -2  34 254.984 84.8005   2
   2   2 -34 265.251 84.2011   5
   2   2 -34 133.876 103.136   4
  -2   2  33 721.651 83.4622   3
   2  -2  33 675.528 122.939   2
   2   2 -33 633.757 125.321   5
   2   2 -33 414.484 132.964   4
  -2   2  32 223.277 49.3973   3
   2  -2  32 186.867 79.4498   3
   2  -2  32 383.210 94.0449   2
   2   2 -32 272.679 83.0578   5
   2   2 -32 287.205 111.832   4
  -2   2  31 1191.78 118.969   3
   2  -2  31 1221.62 159.020   2
   2   2 -31 1306.14 172.030   5
   2   2 -31 1304.75 217.194   4
   2  -2  31 1221.29 167.052   3
  -2   2  30 843.317 105.403   3
   2  -2  30 620.599 120.800   3
   2  -2  30 668.652 121.174   2
   2   2 -30 586.153 118.039   5
   2   2 -30 730.523 162.777   4
   2  -2  29 1570.60 176.915   2
  -2   2  29 1743.01 152.369   3
   2   2 -29 1876.94 202.267   5
   2  -2  29 1764.24 198.252   3
   2   2 -29 1755.20 240.476   4
   2  -2  28 271.139 82.3688   3
  -2   2  28 250.820 67.7881   3
   2  -2  28 105.330 58.9676   2
   2   2 -28 143.499 63.0046   5
   2   2 -28 171.112 90.7182   4
  -2   2  27 2862.44 199.281   3
   2  -2  27 2785.48 218.030   2
   2   2 -27 2923.35 241.947   5
   2   2 -27 2744.54 293.816   4
   2  -2  27 2925.36 252.867   3
   2  -2  26 170.994 61.1173   3
  -2   2  26 351.257 77.6561   3
   2  -2  26 287.868 85.2425   2
   2   2 -26 353.285 98.5222   5
   2   2 -26 302.119 108.768   4
  -2   2  25 1112.09 128.637   3
   2  -2  25 1075.14 138.087   2
   2  -2  25 1135.80 156.707   3
   2   2 -25 1050.80 143.578   5
   2   2 -25 1062.10 179.727   4
   2  -2  24 1857.09 171.591   2
  -2   2  24 1806.08 165.360   3
  -2  -2 -24 1941.24 104.134   3
   2  -2  24 1890.88 198.540   3
   2  -2  24 2524.66 306.108   1
   2   2 -24 1860.25 186.518   5
   2   2 -24 2117.60 242.192   4
  -2   2  23 4070.79 249.560   3
   2  -2  23 3820.04 245.544   2
  -2  -2 -23 3501.97 152.676   3
   2  -2  23 3776.54 279.438   3
   2   2 -23 3716.10 253.869   5
   2   2 -23 3615.55 310.785   4
  -2   2  22 1852.78 168.698   3
   2  -2  22 2054.10 203.661   3
  -2  -2 -22 1756.43 117.161   3
   2  -2  22 1914.74 168.719   2
   2   2 -22 1953.17 184.760   2
   2   2 -22 1985.59 184.295   5
   2   2 -22 1985.03 236.330   4
  -2  -2 -21 831.640 87.3334   3
  -2   2  21 1004.60 126.971   3
   2  -2  21 767.330 126.072   3
   2   2 -21 973.311 125.630   2
   2  -2  21 924.369 116.206   2
   2   2 -21 1035.24 127.587   5
   2   2 -21 895.926 160.977   4
  -2  -2 -20 4496.64 209.829   3
  -2   2  20 4012.47 249.542   3
   2  -2  20 4600.70 300.429   3
   2  -2  20 4609.91 259.296   2
   2   2 -20 4902.82 278.921   2
   2   2 -20 4791.99 265.699   5
   2   2 -20 4787.56 340.296   4
   2  -2  19 2281.90 209.406   3
  -2   2  19 1606.05 161.437   3
   2  -2  19 2013.23 169.765   2
  -2  -2 -19 1855.63 141.162   3
  -2  -2 -19 1759.15 228.189   1
   2   2 -19 2241.91 188.924   2
   2   2 -19 2165.99 174.213   5
   2   2 -19 2079.17 227.314   4
  -2   2  18 2334.25 190.178   3
   2  -2  18 2461.60 217.166   3
   2  -2  18 2368.80 178.349   2
  -2  -2 -18 2181.86 157.880   3
   2   2 -18 2414.08 195.065   2
  -2  -2 -18 2261.75 248.540   1
   2   2 -18 2505.82 183.008   5
  -2   2  17 1144.46 135.539   3
   2  -2  17 965.120 139.680   3
   2  -2  17 1109.34 123.514   2
   2   2 -17 1020.91 124.733   2
   2   2 -17 1133.43 121.571   5
  -2  -2 -17 1029.22 110.984   3
  -2   2  16 1567.59 157.133   3
   2  -2  16 2005.53 196.377   3
   2  -2  16 1774.23 154.071   2
   2   2 -16 1813.06 168.680   2
   2   2 -16 1865.45 149.135   5
  -2  -2 -16 1900.79 155.263   3
   2  -2  15 987.682 137.518   3
  -2   2  15 909.679 120.435   3
   2  -2  15 907.225 105.510   2
   2   2 -15 1066.08 108.767   5
  -2  -2 -15 1053.41 118.263   3
  -2   2  14 1216.13 138.507   3
   2  -2  14 1539.58 170.451   3
   2  -2  14 1617.65 140.340   2
  -2  -2 -14 1328.76 169.140   1
   2   2 -14 1528.09 128.481   5
  -2  -2 -14 1495.02 142.733   3
  -2   2  13 1447.36 149.220   3
   2  -2  13 1576.90 137.587   2
   2  -2  13 1529.56 165.532   3
  -2  -2 -13 1617.60 181.472   1
   2   2 -13 1545.52 127.377   5
  -2  -2 -13 1605.75 151.349   3
  -2  -2 -12 184.053 57.8616   3
  -2   2  12 354.515 77.4895   3
   2  -2  12 363.522 88.9758   3
  -2  -2 -12 143.845 48.5802   1
   2  -2  12 248.055 60.6639   2
   2   2 -12 210.689 51.8519   5
  -2   2  12 145.055 44.5955   4
  -2  -2 -12 262.105 73.6716   5
  -2   2  11 5271.96 283.134   3
   2  -2  11 5342.87 254.088   2
   2  -2  11 6025.25 324.029   3
  -2  -2 -11 5221.62 311.496   1
   2   2 -11 5765.39 237.305   5
  -2  -2 -11 5672.48 353.017   5
  -2   2  11 5401.51 280.178   4
  -2  -2 -11 5129.95 275.395   3
   2  -2  10 5004.74 298.468   3
  -2   2  10 5159.13 280.721   3
  -2  -2 -10 4916.54 291.135   1
   2   2 -10 4689.02 213.340   5
  -2   2  10 5085.78 149.675   5
  -2  -2 -10 5235.63 331.819   5
  -2  -2 -10 4902.84 269.621   3
  -2   2  10 4613.54 260.098   4
   2  -2   9 1024.73 134.869   3
  -2   2   9 1152.79 138.289   3
  -2  -2  -9 943.238 123.131   1
  -2  -2  -9 1046.55 145.743   5
  -2   2   9 1074.37 68.1629   5
   2   2  -9 851.220 90.4768   5
  -2  -2  -9 973.106 124.034   3
  -2   2   9 1172.65 131.428   4
  -2   2   8 3854.53 239.566   3
   2  -2   8 3867.45 263.241   3
  -2  -2  -8 3677.92 236.330   1
  -2  -2  -8 3735.58 263.017   5
   2   2  -8 4085.82 194.654   5
  -2   2   8 3891.98 132.710   5
  -2   2   8 3647.46 231.279   4
  -2  -2  -8 3649.70 238.115   3
  -2   2   7 1469.14 150.580   3
   2  -2   7 1261.17 151.955   3
  -2  -2  -7 1393.58 159.401   5
  -2   2   7 1334.48 81.5727   5
   2   2  -7 1210.91 108.361   5
  -2   2   7 1251.69 136.563   4
  -2  -2  -7 1400.71 148.839   3
   2  -2   6 1912.97 183.814   3
  -2   2   6 1985.57 176.568   3
   2   2  -6 2065.89 140.069   5
  -2  -2  -6 2050.27 186.090   5
  -2   2   6 2146.90 107.459   5
  -2   2   6 1943.99 170.098   4
  -2  -2  -6 1820.58 170.072   3
  -2   2   5 6150.89 304.978   3
   2  -2   5 6174.29 325.199   3
   2   2  -5 6365.85 250.060   5
  -2   2   5 6668.39 200.048   5
  -2  -2  -5 6362.10 317.192   5
  -2   2   5 6781.36 313.619   4
  -2  -2  -5 6699.20 327.046   3
  -2   2   4 9601.89 377.797   3
   2  -2   4 9393.51 400.876   3
  -2   2   4 9418.14 248.555   5
   2   2  -4 9775.72 316.143   5
  -2  -2  -4 9688.64 380.343   5
  -2   2   4 9493.43 375.913   4
  -2  -2  -4 9930.28 401.333   3
  -2   2   3 9131.95 256.351   5
   2   2  -3 8595.78 301.726   5
  -2  -2  -3 8910.88 355.168   5
  -2  -2  -3 8577.82 374.215   3
  -2   2   3 8851.21 364.303   4
   2  -2   3 8919.96 391.952   3
  -2  -2  -2 2202.42 172.607   5
   2   2  -2 2045.81 153.657   5
   2  -2   2 2014.71 186.213   3
  -2   2   2 2229.23 181.376   4
  -2  -2  -2 2309.91 199.502   3
  -2  -2  -1 1469.38 136.438   5
   2   2  -1 1390.99 127.398   5
   2  -2   1 1475.51 162.809   3
  -2  -2   0 3067.87 192.635   5
   2   2   0 3208.65 203.036   5
   2  -2   0 3077.56 233.137   3
   2   2   1 1708.89 154.940   5
  -2  -2   1 1379.28 126.622   5
   2  -2  -1 1576.53 170.069   3
  -2  -2   2 2135.55 151.087   5
   2  -2  -2 2126.41 196.700   3
  -2  -2   3 8757.94 302.269   5
   2  -2  -3 8820.04 395.422   3
  -2  -2   4 9553.02 306.553   5
   2  -2  -4 9775.91 414.112   3
  -2  -2   5 6571.20 251.211   5
   2  -2  -5 6671.53 344.013   3
   2  -2  -6 1952.77 148.692   1
  -2  -2   6 1843.19 132.152   5
   2  -2  -6 1653.60 173.752   3
  -2  -2   6 1882.32 177.310   4
  -2   2  -7 1207.58 126.458   3
   2  -2  -7 983.443 112.989   1
  -2  -2   7 1067.25 99.5317   5
   2  -2  -7 1096.66 141.449   3
  -2  -2   7 1106.03 132.467   4
  -2   2  -8 3919.39 230.298   3
   2  -2  -8 3633.78 225.403   1
  -2  -2   8 3648.55 184.284   5
  -2  -2   8 3865.25 246.039   4
   2  -2  -8 3640.73 261.639   3
  -2   2  -9 857.395 107.556   3
   2  -2  -9 961.807 119.855   1
  -2  -2   9 860.849 89.6367   5
   2  -2  -9 947.767 132.462   3
  -2  -2   9 946.995 132.088   4
   2  -2 -10 5101.28 281.609   1
  -2   2 -10 5036.14 254.674   3
  -2  -2  10 4703.39 264.724   4
   2  -2 -10 4601.68 288.027   3
  -2   2 -11 5776.85 271.219   3
   2  -2 -11 5410.96 298.152   1
   2  -2 -11 5436.34 153.900   5
  -2  -2  11 5774.95 291.955   4
   2  -2 -11 5130.10 300.733   3
   2  -2 -12 104.586 39.3103   3
  -2   2 -12 255.785 59.4743   3
   2  -2 -12 257.665 77.2043   1
   2  -2 -12 182.171 31.2237   5
  -2  -2  12 162.789 53.9680   4
  -2   2 -13 1551.28 137.254   3
   2  -2 -13 1742.04 149.893   2
   2  -2 -13 1571.83 174.027   1
   2  -2 -13 1593.81 88.6551   5
  -2  -2  13 1657.81 154.322   4
   2  -2 -13 1571.25 170.173   3
  -2   2 -14 1573.14 138.472   3
   2  -2 -14 1390.31 169.377   1
   2  -2 -14 1225.56 133.961   2
   2  -2 -14 1396.91 87.5577   5
   2  -2 -14 1374.04 155.816   3
  -2  -2  14 1364.07 139.865   4
  -2   2 -15 1138.38 117.415   3
   2  -2 -15 1140.71 122.822   2
   2  -2 -15 1036.97 80.1376   5
  -2  -2  15 991.776 118.622   4
   2  -2 -15 804.867 116.724   3
  -2   2 -16 1799.49 145.697   3
   2  -2 -16 1738.23 155.386   2
   2  -2 -16 1692.76 108.968   5
  -2  -2  16 1543.85 148.729   4
   2  -2 -16 1501.62 163.809   3
   2  -2 -17 1046.21 121.406   2
   2  -2 -17 1076.49 90.2481   5
   2  -2 -17 984.900 131.817   3
   2  -2 -18 2251.59 179.899   2
   2  -2 -18 2195.71 135.048   5
   2  -2 -18 2330.85 199.332   3
   2   2  19 1844.69 176.280   2
   2  -2 -19 2031.93 172.944   2
   2  -2 -19 1835.27 129.479   5
   2  -2 -19 1790.59 174.460   3
   2   2  20 4524.70 273.953   2
   2  -2 -20 4443.24 258.711   2
   2  -2 -20 4381.13 209.316   5
   2  -2 -20 4928.79 365.120   4
   2  -2 -21 948.319 119.898   2
   2   2  21 931.186 126.783   2
   2  -2 -21 810.642 95.8058   5
   2  -2 -21 1025.44 177.351   4
   2   2  22 1810.36 177.436   2
   2  -2 -22 1847.97 170.912   2
   2  -2 -22 1874.34 149.947   5
   2  -2 -22 2170.30 255.891   4
   2   2  23 3914.17 261.652   2
   2  -2 -23 3782.76 220.050   5
   2  -2 -23 4590.50 378.872   4
  -2  -2  23 3746.83 297.887   3
   2   2  24 1766.21 185.899   2
   2  -2 -24 2155.68 173.177   5
  -2  -2  24 2004.52 222.879   3
   2  -2 -24 2306.58 276.352   4
   2   2  25 1106.26 142.337   2
   2  -2 -25 1240.26 134.408   5
  -2  -2  25 874.708 154.495   3
   2  -2 -25 1583.98 236.379   4
   2   2  26 302.924 85.8562   2
   2  -2 -26 266.925 67.4183   5
   2  -2 -26 477.375 154.486   4
  -2  -2  26 340.992 101.748   3
   2   2  27 2879.77 235.990   2
   2  -2 -27 2779.48 215.638   5
  -2  -2  27 2591.59 255.135   3
   2  -2 -27 3223.55 352.710   4
   2   2  28 142.596 61.6336   2
   2  -2 -28 248.063 70.0530   5
  -2  -2  28 107.105 62.6507   3
   2   2  29 1642.52 185.297   2
   2  -2 -29 1841.80 184.380   5
   2  -2 -29 2158.57 305.080   4
  -2  -2  29 1422.81 189.949   3
   2   2  30 639.673 117.964   2
   2  -2 -30 816.887 126.752   5
  -2  -2  30 624.204 131.570   3
   2   2  31 1340.46 172.562   2
   2  -2 -31 1206.95 160.512   5
   2  -2 -31 1658.03 277.162   4
  -2  -2  31 1036.73 164.476   3
   2   2  32 378.051 96.0905   2
  -2  -2  32 175.007 70.0797   3
   2  -2 -32 436.398 163.762   4
   2   2  33 661.798 126.113   2
  -2  -2  33 615.315 125.161   3
   2  -2 -33 696.132 181.868   4
   2   2  34 271.723 87.2160   2
   2  -2 -34 241.545 118.366   4
  -2  -2  34 247.625 88.7165   3
   2   2  35 108.381 61.8213   2
   2  -2 -35 40.8590 60.1477   4
  -2  -2  35 52.8080 32.7241   3
   2   2  36 357.074 92.4861   2
   2  -2 -36 427.078 158.352   4
  -2  -2  36 188.680 81.0042   3
   2   2  37 841.932 153.514   2
  -2  -2  37 876.363 157.771   3
   2  -2 -37 669.119 180.546   4
   2   2  38 47.3817 43.8965   2
   2  -2 -38 277.732 134.241   4
   2   2  39 524.995 124.709   2
   2  -2 -39 643.826 176.082   4
   2   2  40 156.107 68.2219   2
   2  -2 -40 168.513 121.315   4
   2  -2 -41 102.696 90.9034   4
   2   3 -44 67.4903 133.951   4
   2   3 -43-195.141 113.033   4
   2   3 -42 219.096 124.630   4
   2  -3  41 126.734 82.3093   2
   2   3 -41 35.4881 63.4676   4
   2  -3  40 30.3102 49.7511   2
   2   3 -40 60.0138 77.6875   4
   2  -3  39 51.5763 67.5884   2
   2   3 -39-34.2839 68.8580   4
   2  -3  38 300.791 98.6852   2
   2   3 -38 389.817 121.634   5
   2   3 -38 474.455 139.626   4
   2  -3  37 395.622 109.068   2
   2   3 -37 501.265 140.193   5
   2   3 -37 458.743 149.139   4
   2  -3  36 843.960 146.513   2
   2   3 -36 874.454 173.308   5
   2   3 -36 912.940 199.838   4
   2  -3  35 135.594 72.1084   2
   2   3 -35 91.8394 73.0758   5
   2   3 -35 233.824 121.903   4
   2  -3  34 174.074 58.9039   2
   2   3 -34 321.051 108.988   5
   2   3 -34 96.7808 69.9368   4
   2  -3  33 375.898 94.2102   2
   2   3 -33 376.528 109.282   5
   2   3 -33 235.784 94.7728   4
  -2   3  32 839.797 73.9419   3
   2  -3  32 886.846 158.682   3
   2  -3  32 1054.20 152.225   2
   2   3 -32 875.528 157.149   5
   2   3 -32 910.550 184.531   4
  -2   3  31 1071.07 91.9863   3
   2  -3  31 924.695 159.807   3
   2  -3  31 1040.81 148.143   2
   2   3 -31 1059.41 176.519   5
   2   3 -31 1062.98 189.629   4
  -2   3  30 557.233 72.4526   3
   2  -3  30 698.314 136.314   3
   2  -3  30 654.571 116.424   2
   2   3 -30 602.951 130.230   5
   2   3 -30 735.857 164.622   4
  -2   3  29 1037.91 104.007   3
   2  -3  29 830.537 146.594   3
   2  -3  29 855.205 126.754   2
   2   3 -29 1288.08 179.549   5
   2   3 -29 810.436 169.160   4
  -2   3  28 34.9785 21.9701   3
   2  -3  28 57.1672 50.1641   3
   2  -3  28 6.33126 37.2804   2
   2   3 -28 20.8847 40.9541   5
   2   3 -28 160.207 75.5731   4
  -2   3  27 28.4114 27.7696   3
   2  -3  27 19.7055 29.7100   2
   2   3 -27 56.6170 37.1224   5
   2   3 -27 23.1814 44.8998   4
  -2   3  26 3148.60 190.451   3
   2  -3  26 2993.83 270.193   3
   2  -3  26 2596.05 204.789   2
   2   3 -26 2685.08 242.723   5
   2   3 -26 2963.05 296.656   4
   2  -3  25 1102.22 165.968   3
  -2   3  25 824.852 102.308   3
  -2  -3 -25 857.196 61.6064   3
   2  -3  25 897.868 122.936   2
   2   3 -25 1068.44 155.823   5
   2   3 -25 1093.80 188.625   4
  -2  -3 -24 1521.58 96.3421   3
   2  -3  24 1663.00 165.039   2
   2  -3  24 1608.15 193.834   3
  -2   3  24 1611.64 144.491   3
  -2  -3 -24 1646.19 252.476   1
   2   3 -24 1799.34 197.367   5
   2   3 -24 1670.81 212.694   4
  -2  -3 -23 1223.15 99.6792   3
   2  -3  23 1321.19 178.082   3
   2  -3  23 1503.41 151.948   2
  -2   3  23 1093.15 122.036   3
  -2  -3 -23 1182.74 210.506   1
   2   3 -23 1590.69 181.076   5
   2   3 -23 1523.19 206.776   4
   2  -3  22 8437.26 436.292   3
   2  -3  22 8366.81 347.821   2
  -2   3  22 8101.11 327.577   3
  -2  -3 -22 8046.75 268.690   3
   2   3 -22 8189.30 368.319   2
  -2  -3 -22 8614.25 542.169   1
   2   3 -22 9156.53 419.719   5
   2   3 -22 8597.11 469.754   4
  -2  -3 -21 1571.66 129.907   3
   2  -3  21 2220.02 177.884   2
  -2   3  21 1784.84 157.452   3
   2  -3  21 2060.84 216.411   3
   2   3 -21 1997.52 180.014   2
  -2  -3 -21 2003.76 272.775   1
   2   3 -21 2232.59 210.216   5
   2   3 -21 1823.41 224.990   4
   2  -3  20 2677.45 239.891   3
   2  -3  20 2635.51 190.381   2
  -2   3  20 2593.92 189.011   3
   2   3 -20 2574.04 203.265   2
  -2  -3 -20 2248.11 271.240   1
   2   3 -20 2772.83 227.978   5
  -2  -3 -20 2774.24 299.070   5
  -2  -3 -20 2612.35 174.271   3
   2   3 -20 2538.06 248.423   4
  -2  -3 -19 812.561 99.8658   3
  -2   3  19 882.517 113.598   3
   2  -3  19 1004.15 152.183   3
   2  -3  19 951.573 114.468   2
   2   3 -19 770.028 113.452   2
  -2  -3 -19 873.749 170.952   1
   2   3 -19 919.434 127.979   5
  -2  -3 -19 931.824 167.358   5
   2  -3  18 705.958 124.791   3
  -2  -3 -18 756.375 100.478   3
  -2   3  18 617.885 95.1901   3
   2   3 -18 661.589 104.313   2
  -2  -3 -18 628.841 139.465   1
   2  -3  18 687.885 96.0022   2
   2   3 -18 717.093 109.635   5
  -2  -3 -18 818.717 153.094   5
  -2   3  17 1604.27 151.179   3
   2  -3  17 1549.99 140.852   2
   2  -3  17 1720.08 192.579   3
   2   3 -17 1451.48 150.699   2
  -2  -3 -17 1619.76 214.436   1
  -2  -3 -17 1990.54 242.794   5
   2   3 -17 1591.69 160.167   5
  -2  -3 -17 1757.76 155.971   3
   2  -3  16 2921.89 244.625   3
  -2   3  16 3021.08 207.029   3
   2  -3  16 2791.61 186.939   2
   2   3 -16 2585.52 206.768   2
   2   3 -16 2980.51 215.180   5
  -2  -3 -16 3227.86 302.209   5
  -2  -3 -16 2984.09 207.126   3
   2  -3  15 3199.88 255.260   3
  -2   3  15 2786.87 199.778   3
   2  -3  15 2571.39 176.328   2
   2   3 -15 2679.68 200.028   5
  -2  -3 -15 2188.84 246.832   5
  -2  -3 -15 2682.75 198.713   3
   2  -3  14 4067.18 285.230   3
  -2   3  14 3589.01 226.628   3
   2  -3  14 3881.86 213.014   2
   2   3 -14 3787.01 237.580   5
  -2  -3 -14 3927.70 316.643   5
  -2  -3 -14 3740.15 238.721   3
   2  -3  13 266.115 77.6069   3
  -2   3  13 399.499 84.3114   3
   2  -3  13 205.887 51.4551   2
   2   3 -13 223.898 69.1544   5
  -2   3  13 234.834 49.1397   5
  -2  -3 -13 211.607 68.4106   3
  -2  -3 -13 277.062 93.4610   5
  -2   3  12 9633.53 371.806   3
   2  -3  12 8857.63 418.094   3
   2  -3  12 8822.08 314.830   2
   2   3 -12 9634.55 370.621   5
  -2   3  12 9660.13 291.453   5
  -2  -3 -12 10095.1 489.668   5
  -2  -3 -12 9262.50 383.393   3
   2  -3  11 20080.7 475.017   2
   2  -3  11 20605.5 640.387   3
  -2   3  11 20831.3 546.432   3
   2   3 -11 21555.3 547.902   5
  -2   3  11 21244.9 426.105   5
  -2  -3 -11 21407.8 700.634   5
  -2  -3 -11 21139.2 577.630   3
  -2   3  11 20559.9 542.547   4
   2  -3  10 6879.27 276.956   2
  -2   3  10 8312.87 350.216   3
   2  -3  10 8007.99 396.134   3
  -2   3  10 7862.28 259.104   5
   2   3 -10 7558.92 323.726   5
  -2  -3 -10 7418.48 405.806   5
  -2  -3 -10 7529.21 348.409   3
  -2   3  10 7543.78 332.291   4
  -2   3   9 21590.7 554.398   3
   2  -3   9 23455.1 664.467   3
   2   3  -9 23176.6 560.893   5
  -2  -3  -9 22342.5 684.926   5
  -2   3   9 22305.2 439.767   5
  -2   3   9 22235.3 565.675   4
  -2  -3  -9 22048.9 600.478   3
   2  -3   8 2977.74 243.161   3
  -2   3   8 3032.55 220.334   3
  -2  -3  -8 2459.88 227.477   5
   2   3  -8 3028.97 205.172   5
  -2   3   8 2480.21 147.749   5
  -2   3   8 2571.80 192.854   4
  -2  -3  -8 2783.85 219.432   3
   2  -3   7 20102.5 609.557   3
  -2   3   7 18210.8 508.103   3
  -2   3   7 19243.3 416.471   5
  -2  -3  -7 18934.1 614.151   5
   2   3  -7 19847.3 518.132   5
  -2  -3  -7 19617.6 572.703   3
  -2   3   7 18378.2 511.525   4
   2  -3   6 7471.99 373.635   3
  -2   3   6 6313.38 304.321   3
  -2   3   6 6960.89 253.320   5
  -2  -3  -6 6742.70 359.560   5
   2   3  -6 7160.28 311.335   5
  -2  -3  -6 6919.78 343.616   3
  -2   3   6 6586.51 303.055   4
   2  -3   5 851.185 131.788   3
  -2   3   5 917.058 126.655   3
   2   3  -5 662.163 98.4664   5
  -2   3   5 496.203 70.0959   5
  -2  -3  -5 741.468 117.455   5
  -2  -3  -5 616.956 114.341   3
  -2   3   5 600.215 93.8920   4
  -2   3   4 11359.2 402.097   3
   2  -3   4 12574.2 478.554   3
  -2   3   4 11665.6 342.068   5
   2   3  -4 12796.0 422.891   5
  -2  -3  -4 11751.1 453.666   5
  -2  -3  -4 12618.9 466.873   3
  -2   3   4 11630.4 407.617   4
   2  -3   3 6011.16 339.622   3
  -2   3   3 6023.81 250.262   5
   2   3  -3 5720.53 285.467   5
  -2  -3  -3 6074.56 316.024   5
  -2   3   3 5810.35 287.279   4
   2  -3   2 21311.3 630.789   3
  -2   3   2 21841.5 487.318   5
   2   3  -2 22564.0 572.959   5
  -2  -3  -2 22169.1 594.474   5
  -2   3   2 22067.7 563.014   4
   2  -3   1 12754.0 488.529   3
  -2   3   1 13462.5 397.891   5
   2   3  -1 13413.6 447.797   5
  -2  -3  -1 13536.2 456.213   5
  -2   3   1 13432.5 437.737   4
   2  -3   0 13381.3 501.004   3
  -2   3   0 12837.9 398.353   5
  -2  -3   0 12802.2 437.340   5
   2   3   0 13182.2 449.707   5
  -2   3   0 13125.0 437.306   4
   2  -3  -1 13750.6 506.931   3
   2   3   1 13767.9 469.545   5
  -2  -3   1 12415.5 422.019   5
   2  -3  -2 21554.7 639.140   3
   2   3   2 22936.9 617.694   5
  -2  -3   2 21196.6 544.606   5
   2  -3  -3 6344.86 345.280   3
   2   3   3 6031.78 324.076   5
  -2  -3   3 5195.11 266.004   5
   2   3   4 11838.2 464.413   5
  -2  -3   4 11767.8 396.193   5
   2  -3  -4 11795.6 471.548   3
   2  -3  -5 636.917 115.193   3
  -2  -3   5 678.635 95.2139   5
   2   3   5 561.979 107.869   5
  -2  -3   6 6937.62 300.877   5
   2  -3  -6 7028.75 369.039   3
  -2  -3   7 18725.4 496.642   5
   2  -3  -7 19249.7 596.976   4
  -2  -3   7 18693.8 539.519   4
   2  -3  -7 18922.5 601.385   3
  -2  -3   8 2736.35 191.013   5
  -2  -3   8 2944.83 209.357   4
   2  -3  -8 2403.97 215.953   3
   2  -3  -8 2535.48 220.059   4
  -2   3  -9 22246.0 541.406   3
   2  -3  -9 22144.9 637.898   1
  -2  -3   9 22681.9 548.561   5
   2  -3  -9 21636.0 435.886   5
  -2  -3   9 21816.0 563.108   4
   2  -3  -9 22181.5 658.826   4
   2  -3  -9 21736.2 644.224   3
  -2   3 -10 7136.15 311.768   3
   2  -3 -10 7644.02 385.183   1
  -2  -3  10 7113.48 313.836   5
   2  -3 -10 7513.51 251.035   5
   2  -3 -10 7636.42 393.835   4
   2  -3 -10 7351.76 375.876   3
  -2  -3  10 6648.55 310.958   4
  -2   3 -11 20214.8 512.716   3
   2  -3 -11 20018.6 495.766   2
   2  -3 -11 21030.0 657.896   1
   2  -3 -11 20463.3 419.569   5
   2  -3 -11 20776.8 629.770   3
  -2  -3  11 19701.6 528.005   4
   2  -3 -11 22070.5 667.018   4
  -2   3 -12 9126.04 344.935   3
   2  -3 -12 8773.84 331.327   2
   2  -3 -12 9559.59 445.154   1
   2  -3 -12 9057.71 278.522   5
   2  -3 -12 9213.17 427.169   3
   2  -3 -12 9472.75 446.432   4
  -2  -3  12 8707.83 348.886   4
   2  -3 -13 239.208 72.9402   3
  -2   3 -13 249.824 66.4142   3
   2  -3 -13 259.803 57.6983   2
   2  -3 -13 355.432 101.164   1
   2  -3 -13 234.935 43.9828   5
  -2  -3  13 199.195 58.4682   4
   2  -3 -13 276.495 91.2054   4
   2   3  14 3363.73 226.860   2
   2  -3 -14 3638.57 213.216   2
   2  -3 -14 3724.21 297.927   1
   2  -3 -14 3686.99 181.418   5
   2  -3 -14 3695.11 291.075   4
  -2  -3  14 3608.92 222.939   4
   2  -3 -14 3444.42 257.359   3
   2   3  15 2331.52 192.373   2
   2  -3 -15 2456.38 178.852   2
   2  -3 -15 2230.05 235.052   1
   2  -3 -15 2527.17 152.800   5
   2  -3 -15 2791.70 252.355   4
  -2  -3  15 2420.66 181.416   4
   2  -3 -15 2256.57 205.660   3
   2   3  16 2903.17 212.270   2
   2  -3 -16 2903.94 194.904   2
   2  -3 -16 2805.27 266.150   1
   2  -3 -16 2746.05 164.945   5
  -2  -3  16 2691.83 190.604   4
   2  -3 -16 3113.69 269.326   4
   2  -3 -16 2635.19 224.780   3
   2   3  17 1558.51 158.128   2
   2  -3 -17 1701.22 151.489   2
   2  -3 -17 1846.87 227.718   1
   2  -3 -17 1609.09 128.691   5
   2  -3 -17 1490.96 190.346   4
   2  -3 -17 1592.19 174.804   3
   2  -3 -18 683.352 99.6508   2
   2   3  18 816.012 115.585   2
   2  -3 -18 601.209 142.018   1
   2  -3 -18 729.467 89.1235   5
   2  -3 -18 682.628 115.998   3
   2  -3 -18 767.976 141.934   4
   2  -3 -19 853.642 111.568   2
   2  -3 -19 1041.41 188.184   1
   2   3  19 728.917 110.821   2
   2  -3 -19 679.949 89.1157   5
   2  -3 -19 839.805 126.938   3
   2  -3 -19 949.506 158.858   4
   2   3  20 2520.43 206.319   2
   2  -3 -20 2838.96 303.709   1
   2  -3 -20 2792.53 201.761   2
   2  -3 -20 2652.52 180.105   5
   2  -3 -20 3322.21 306.526   4
   2  -3 -20 2409.17 205.999   3
   2   3  21 1552.46 171.857   2
   2  -3 -21 1560.16 153.852   2
   2  -3 -21 1526.00 142.302   5
   2  -3 -21 1790.16 178.909   3
   2  -3 -21 2055.14 251.865   4
   2   3  22 7872.97 375.098   2
   2  -3 -22 8038.77 354.869   2
   2  -3 -22 8220.00 332.936   5
   2  -3 -22 9408.70 534.738   4
   2  -3 -22 7982.89 368.708   3
   2   3  23 1326.75 156.814   2
   2  -3 -23 1244.88 134.272   5
   2  -3 -23 1569.83 237.577   4
   2   3  24 1315.82 158.758   2
   2  -3 -24 1677.14 162.361   5
   2  -3 -24 2120.22 275.654   4
   2   3  25 808.142 133.108   2
   2  -3 -25 729.507 108.592   5
   2  -3 -25 1247.13 229.007   4
   2   3  26 2949.20 238.996   2
   2  -3 -26 2983.22 223.304   5
   2  -3 -26 4042.42 402.773   4
   2   3  27 60.1162 34.2355   2
   2  -3 -27 58.7880 32.5316   5
   2  -3 -27 209.048 115.691   4
   2   3  28 4.30288 49.7332   2
   2  -3 -28 29.7787 31.4923   5
  -2  -3  28 142.834 67.3442   3
   2   3  29 820.391 130.040   2
   2  -3 -29 961.387 139.286   5
  -2  -3  29 1182.00 184.273   3
   2   3  30 381.626 95.2931   2
   2  -3 -30 662.287 119.269   5
  -2  -3  30 543.574 129.910   3
   2  -3 -30 918.543 219.633   4
   2   3  31 938.749 146.758   2
  -2  -3  31 830.200 162.039   3
   2  -3 -31 1479.70 271.854   4
   2   3  32 744.733 135.150   2
  -2  -3  32 940.783 169.233   3
   2  -3 -32 1162.58 240.696   4
   2   3  33 336.648 92.8270   2
  -2  -3  33 214.471 89.0969   3
   2   3  34 152.527 58.8486   2
  -2  -3  34 211.739 91.9747   3
   2  -3 -34 277.192 124.075   4
   2   3  35 92.8405 52.1391   2
  -2  -3  35-15.3537 38.3169   3
   2  -3 -35 195.983 114.570   4
   2   3  36 933.174 158.817   2
  -2  -3  36 838.575 164.913   3
   2  -3 -36 919.980 220.918   4
   2   3  37 357.588 107.155   2
   2  -3 -37 445.596 161.793   4
  -2  -3  37 242.330 94.6484   3
   2   3  38 390.501 108.712   2
   2  -3 -38 594.764 181.733   4
   2   3  39 44.3834 41.2195   2
   2  -3 -39 27.7504 82.5583   4
   2   3  40 167.498 82.6227   2
   2  -3 -40 63.6032 80.6567   4
   2   4 -44-252.454 130.311   4
   2   4 -43 78.3650 68.0792   4
   2   4 -42 104.155 118.975   4
   2  -4  41 503.851 138.604   2
   2   4 -41 262.442 140.288   4
   2  -4  40 326.432 109.549   2
   2   4 -40 177.769 107.408   4
   2  -4  39 66.6252 52.8130   2
   2   4 -39 53.2747 92.0925   4
   2  -4  38 11.0683 42.2622   2
   2   4 -38 116.911 72.7365   5
   2   4 -38-9.63001 50.9673   4
   2  -4  37 6.06658 33.2880   2
   2   4 -37 65.8607 64.6110   5
   2   4 -37 23.3678 59.9763   4
   2  -4  36 389.261 97.6282   2
   2   4 -36 103.168 81.1513   5
   2   4 -36 201.556 77.4004   4
   2  -4  35 203.423 76.8773   2
   2   4 -35 195.575 90.8701   5
   2   4 -35 271.437 109.326   4
   2  -4  34 307.243 88.2581   2
   2   4 -34 80.1593 60.0290   5
   2   4 -34 293.821 112.028   4
   2  -4  33 487.395 108.282   2
   2   4 -33 513.676 126.938   5
   2   4 -33 349.719 123.139   4
   2  -4  32 388.878 93.1241   2
   2   4 -32 321.687 110.568   5
   2   4 -32 135.331 59.3588   4
   2  -4  31 385.181 113.052   3
   2  -4  31 506.651 100.495   2
   2   4 -31 455.823 127.928   5
   2   4 -31 427.852 126.308   4
   2  -4  30 773.337 159.328   3
   2  -4  30 781.013 122.876   2
   2   4 -30 867.255 161.282   5
   2   4 -30 610.098 141.698   4
   2  -4  29 689.054 146.617   3
   2  -4  29 740.706 122.101   2
   2   4 -29 541.480 131.512   5
   2   4 -29 680.031 152.998   4
   2  -4  28 470.578 117.475   3
   2  -4  28 452.629 98.6638   2
  -2  -4 -28 201.468 107.560   1
   2   4 -28 565.336 126.954   5
   2   4 -28 522.213 126.345   4
   2  -4  27 965.931 162.743   3
  -2   4  27 1301.37 111.357   3
   2  -4  27 989.594 133.360   2
  -2  -4 -27 1378.37 258.227   1
   2   4 -27 926.770 164.417   5
   2   4 -27 1087.21 178.138   4
   2  -4  26 770.286 143.190   3
  -2  -4 -26 572.370 46.5709   3
  -2   4  26 798.517 91.0683   3
  -2  -4 -26 999.904 215.465   1
   2  -4  26 582.979 100.909   2
   2   4 -26 650.387 131.904   5
   2   4 -26 607.453 141.483   4
  -2  -4 -25 5142.45 176.221   3
   2  -4  25 5362.08 377.318   3
  -2   4  25 5477.39 239.000   3
   2  -4  25 5246.83 287.305   2
  -2  -4 -25 5135.19 461.183   1
   2   4 -25 5289.13 364.702   5
   2   4 -25 4998.05 372.154   4
  -2  -4 -24 905.200 85.7926   3
   2  -4  24 913.597 156.646   3
   2  -4  24 1032.44 135.462   2
  -2   4  24 1081.45 110.547   3
  -2  -4 -24 832.369 195.524   1
   2   4 -24 999.818 162.991   5
   2   4 -24 1118.42 179.976   4
   2  -4  23 131.976 58.2792   3
  -2  -4 -23 101.436 43.6953   3
  -2   4  23 104.656 40.2633   3
   2  -4  23 121.689 42.8497   2
  -2  -4 -23 243.781 107.510   1
   2   4 -23 168.324 77.3565   5
   2   4 -23 154.576 88.6248   4
   2  -4  22 621.626 127.543   3
  -2  -4 -22 518.721 77.8297   3
  -2   4  22 493.966 75.4888   3
   2   4 -22 675.117 108.113   2
  -2  -4 -22 534.270 149.876   1
   2  -4  22 438.969 80.0265   2
   2   4 -22 780.846 135.393   5
   2   4 -22 543.051 120.226   4
   2  -4  21 1255.90 176.705   3
   2  -4  21 1238.98 129.715   2
  -2   4  21 1108.96 115.969   3
   2   4 -21 1142.67 134.169   2
  -2  -4 -21 988.176 191.662   1
   2   4 -21 1266.30 172.796   5
   2   4 -21 970.545 154.061   4
  -2  -4 -21 1408.22 135.789   3
   2  -4  20 581.147 119.024   3
  -2   4  20 586.237 86.1669   3
  -2  -4 -20 529.079 84.0120   3
  -2  -4 -20 454.839 131.888   1
   2   4 -20 592.430 98.6766   2
   2  -4  20 561.219 87.7982   2
   2   4 -20 572.240 118.705   5
   2  -4  19 1534.43 192.781   3
  -2   4  19 1419.63 136.342   3
   2  -4  19 1449.15 132.631   2
   2   4 -19 1456.06 156.806   2
  -2  -4 -19 1317.34 209.598   1
   2   4 -19 1671.83 188.742   5
  -2  -4 -19 1509.90 147.674   3
   2  -4  18 1399.13 180.227   3
  -2   4  18 1334.77 134.166   3
   2  -4  18 1301.65 127.948   2
   2   4 -18 1200.30 137.407   2
  -2  -4 -18 1221.95 202.429   1
   2   4 -18 1382.40 171.369   5
  -2  -4 -18 1540.69 225.260   5
  -2  -4 -18 1313.32 143.771   3
   2  -4  17 1773.90 206.729   3
   2  -4  17 1391.70 129.013   2
  -2   4  17 1534.74 141.909   3
   2   4 -17 1357.31 156.737   2
  -2  -4 -17 1471.87 220.411   1
   2   4 -17 1510.72 176.010   5
  -2  -4 -17 1791.00 237.456   5
  -2  -4 -17 1466.03 152.696   3
   2  -4  16 913.680 146.599   3
  -2   4  16 763.891 103.079   3
   2  -4  16 927.800 100.883   2
   2   4 -16 751.503 110.264   2
  -2  -4 -16 861.500 166.235   1
  -2  -4 -16 906.373 168.001   5
   2   4 -16 831.624 132.732   5
  -2  -4 -16 806.709 117.189   3
   2  -4  15 1333.59 173.488   3
  -2   4  15 1199.15 128.726   3
   2  -4  15 1234.79 119.551   2
  -2  -4 -15 976.403 174.164   1
   2   4 -15 1405.63 164.909   5
  -2   4  15 1222.33 130.733   5
  -2  -4 -15 1269.16 195.988   5
  -2  -4 -15 1167.26 139.934   3
   2  -4  14 147.847 63.9857   3
  -2  -4 -14 120.258 67.4830   1
   2  -4  14 104.035 43.8537   2
  -2  -4 -14 109.268 64.7969   5
   2   4 -14 55.6588 31.5134   5
  -2  -4 -14 190.068 63.7019   3
  -2   4  14 177.049 56.2944   5
   2  -4  13 10156.8 471.982   3
   2  -4  13 9287.07 311.681   2
   2   4 -13 9950.51 431.278   5
  -2  -4 -13 9697.54 511.408   5
  -2   4  13 10029.1 362.214   5
  -2  -4 -13 9489.33 402.394   3
   2  -4  12 5258.17 336.368   3
   2  -4  12 4660.67 219.344   2
   2   4 -12 5086.94 305.849   5
  -2  -4 -12 4909.20 357.964   5
  -2   4  12 4920.77 254.025   5
  -2  -4 -12 4747.98 286.157   3
   2  -4  11 656.800 122.604   3
   2  -4  11 574.565 78.4853   2
  -2  -4 -11 519.320 124.550   5
   2   4 -11 722.096 118.177   5
  -2   4  11 431.296 78.4016   5
  -2  -4 -11 372.952 87.3353   3
   2  -4  10 8913.25 298.205   2
   2  -4  10 9747.90 458.141   3
  -2   4  10 9829.41 354.523   5
  -2  -4 -10 9827.77 492.087   5
   2   4 -10 9412.07 409.584   5
  -2  -4 -10 9634.00 414.336   3
   2  -4   9 6326.14 252.523   2
   2  -4   9 6968.08 379.714   3
  -2  -4  -9 6644.08 396.492   5
   2   4  -9 7036.51 353.442   5
  -2   4   9 6440.23 289.364   5
  -2   4   9 6545.51 302.429   4
   2  -4   8 6309.95 357.747   3
  -2  -4  -8 6262.72 376.009   5
   2   4  -8 5849.98 323.523   5
  -2   4   8 6082.51 283.074   5
  -2   4   8 5546.75 276.765   4
   2  -4   7 836.108 134.744   3
   2   4  -7 794.299 118.531   5
  -2  -4  -7 651.803 129.015   5
  -2   4   7 602.083 88.7878   5
  -2   4   7 649.835 99.2023   4
   2  -4   6 8302.53 409.333   3
  -2  -4  -6 7877.71 410.564   5
  -2   4   6 8024.82 327.338   5
   2   4  -6 8387.25 387.232   5
  -2   4   6 7682.15 323.916   4
   2  -4   5 5301.82 329.381   3
  -2   4   5 5515.79 273.379   5
   2   4  -5 5297.61 309.134   5
  -2  -4  -5 5809.00 346.929   5
  -2   4   5 5531.19 275.870   4
   2  -4   4 3508.08 265.018   3
   2   4  -4 3370.37 248.393   5
  -2   4   4 3110.90 206.361   5
  -2  -4  -4 3441.58 263.487   5
  -2   4   4 3288.50 211.790   4
   2  -4   3 27700.0 742.502   3
  -2   4   3 26792.5 609.951   5
   2   4  -3 27411.1 706.938   5
  -2  -4  -3 26952.7 726.429   5
  -2   4   3 26071.1 594.915   4
   2  -4   2 519.354 111.057   3
   2   4  -2 536.832 110.066   5
  -2   4   2 474.357 85.8817   5
  -2  -4  -2 598.779 108.004   5
  -2   4   2 628.307 95.3396   4
   2  -4   1 7364.04 386.032   3
   2   4  -1 7658.56 378.710   5
  -2  -4  -1 7453.94 376.336   5
  -2   4   1 7284.90 327.616   5
  -2   4   1 7434.54 314.653   4
   2  -4   0 8751.55 421.270   3
  -2   4   0 8400.38 360.316   5
   2   4   0 8911.81 411.429   5
  -2  -4   0 8446.03 391.776   5
  -2   4   0 8133.26 340.319   4
   2  -4  -1 7681.48 394.489   3
  -2   4  -1 7335.37 341.075   5
  -2  -4   1 7193.53 357.880   5
   2   4   1 7985.88 392.661   5
  -2   4  -1 7045.14 309.828   4
   2  -4  -2 564.445 122.073   3
  -2  -4   2 441.134 95.7285   5
  -2   4  -2 316.610 83.8992   5
   2   4   2 432.007 100.884   5
  -2   4  -2 349.203 73.7960   4
   2  -4  -3 28554.5 758.378   3
  -2  -4   3 27229.0 684.829   5
   2   4   3 27596.1 748.222   5
  -2   4  -3 26172.9 677.058   5
   2  -4  -4 3533.84 269.056   3
   2   4   4 3073.43 254.105   5
  -2  -4   4 3024.83 227.408   5
   2  -4  -5 5855.24 348.035   3
  -2  -4   5 5109.88 293.868   5
   2  -4  -6 8176.56 410.758   3
  -2  -4   6 8443.90 379.423   5
   2  -4  -7 707.707 124.980   3
   2  -4  -7 667.728 93.6502   5
  -2  -4   7 780.792 117.012   5
  -2  -4   7 740.285 110.050   4
   2  -4  -7 662.744 118.774   4
   2  -4  -8 5776.71 344.135   3
  -2  -4   8 5975.11 320.392   5
   2  -4  -8 6151.27 284.141   5
  -2  -4   8 6062.56 301.829   4
   2  -4  -8 6192.12 352.836   4
   2  -4  -9 6349.18 266.332   2
   2  -4  -9 6615.63 291.645   5
  -2  -4   9 6720.78 341.214   5
  -2  -4   9 6242.98 301.058   4
   2  -4  -9 7028.99 377.206   4
   2  -4  -9 6915.29 378.145   3
   2  -4 -10 9581.79 324.271   2
  -2  -4  10 8983.80 399.986   5
   2  -4 -10 8986.53 335.983   5
   2  -4 -10 9986.06 455.329   4
  -2  -4  10 8888.96 353.534   4
   2  -4 -10 10116.3 459.802   3
   2  -4 -11 340.978 86.7911   3
   2  -4 -11 352.180 62.1556   2
  -2  -4  11 617.119 107.789   5
   2  -4 -11 395.168 74.5689   5
   2  -4 -11 494.029 105.677   4
  -2  -4  11 495.828 81.9626   4
   2  -4 -12 4697.49 232.998   2
   2  -4 -12 5035.78 358.099   1
   2  -4 -12 4680.81 243.535   5
  -2  -4  12 4719.81 252.381   4
   2  -4 -12 4627.11 313.330   3
   2  -4 -12 4615.04 311.288   4
   2   4  13 8841.84 362.755   2
   2  -4 -13 9197.61 326.634   2
   2  -4 -13 9618.98 498.940   1
   2  -4 -13 9065.83 340.956   5
  -2  -4  13 8876.42 340.687   4
   2  -4 -13 9684.79 463.316   4
   2  -4 -13 9700.53 450.319   3
   2  -4 -14 171.939 69.9455   3
   2   4  14 211.990 60.1469   2
   2  -4 -14 173.742 49.2736   2
   2  -4 -14 48.1121 46.3257   1
   2  -4 -14 198.407 53.4586   5
  -2  -4  14 65.0103 29.9400   4
   2  -4 -14 224.909 75.2858   4
   2  -4 -15 992.862 148.124   3
   2   4  15 1194.14 133.190   2
   2  -4 -15 1108.02 119.755   2
   2  -4 -15 904.581 162.562   1
   2  -4 -15 1220.58 125.355   5
  -2  -4  15 1154.04 121.302   4
   2  -4 -15 1188.31 167.826   4
   2  -4 -16 722.034 121.620   3
   2  -4 -16 771.449 97.0561   2
   2   4  16 750.605 107.776   2
   2  -4 -16 788.374 157.243   1
   2  -4 -16 851.533 105.078   5
   2  -4 -16 776.056 142.176   4
   2   4  17 1579.59 157.099   2
   2  -4 -17 1507.89 141.356   2
   2  -4 -17 1526.25 219.978   1
   2  -4 -17 1604.32 148.296   5
   2  -4 -17 1702.85 209.654   4
   2  -4 -17 1533.15 177.904   3
   2   4  18 1297.11 145.972   2
   2  -4 -18 1476.70 138.666   2
   2  -4 -18 1127.65 191.634   1
   2  -4 -18 1403.43 141.612   5
   2  -4 -18 1392.77 168.584   3
   2  -4 -18 1528.27 202.289   4
   2   4  19 1541.60 163.325   2
   2  -4 -19 1490.37 144.812   2
   2  -4 -19 1248.43 202.556   1
   2  -4 -19 1694.01 156.535   5
   2  -4 -19 1504.45 205.143   4
   2  -4 -19 1593.22 179.218   3
   2   4  20 658.711 112.013   2
   2  -4 -20 513.850 137.049   1
   2  -4 -20 479.823 84.5284   2
   2  -4 -20 653.020 100.329   5
   2  -4 -20 735.456 150.735   4
   2  -4 -20 658.802 115.186   3
   2   4  21 1369.99 154.480   2
   2  -4 -21 1342.42 143.550   2
   2  -4 -21 1003.32 188.116   1
   2  -4 -21 1206.63 135.813   5
   2  -4 -21 1363.24 164.403   3
   2  -4 -21 1298.03 199.370   4
   2  -4 -22 476.899 127.882   1
   2   4  22 531.503 94.0265   2
   2  -4 -22 505.022 91.4336   5
   2  -4 -22 418.034 87.3967   3
   2  -4 -22 633.627 139.685   4
   2  -4 -23 167.089 93.0433   1
   2   4  23 176.133 66.9845   2
   2  -4 -23 128.352 46.4094   5
   2  -4 -23 240.227 100.317   4
   2  -4 -23 100.845 43.5120   3
   2  -4 -24 995.055 216.719   1
   2   4  24 810.484 128.087   2
   2  -4 -24 955.400 129.660   5
   2  -4 -24 833.062 121.132   3
   2  -4 -24 1435.24 229.175   4
   2   4  25 5154.78 312.797   2
   2  -4 -25 5342.18 466.292   1
   2  -4 -25 5456.41 314.069   5
   2  -4 -25 6037.79 475.751   4
   2  -4 -25 5160.46 296.417   3
   2   4  26 828.974 131.070   2
   2  -4 -26 841.400 126.036   5
   2   4  27 1058.86 147.329   2
   2  -4 -27 1301.11 159.810   5
   2  -4 -27 1624.66 262.552   4
   2   4  28 611.119 117.388   2
   2  -4 -28 648.283 119.441   5
   2  -4 -28 966.308 220.447   4
   2   4  29 673.102 124.206   2
   2  -4 -29 472.980 102.771   5
   2  -4 -29 800.636 202.548   4
   2   4  30 774.261 134.966   2
   2  -4 -30 1099.09 234.570   4
   2   4  31 659.391 126.097   2
   2  -4 -31 952.033 240.220   4
   2   4  32 393.269 97.2314   2
   2  -4 -32 667.947 189.432   4
   2   4  33 397.461 100.221   2
   2  -4 -33 597.658 183.805   4
   2   4  34 191.140 72.1696   2
   2  -4 -34 305.551 144.323   4
  -2  -4  34 160.516 93.1534   3
   2   4  35 160.526 67.9631   2
  -2  -4  35 245.986 91.4127   3
   2   4  36 287.560 93.0951   2
  -2  -4  36 267.489 96.3146   3
   2  -4 -36 192.439 110.515   4
   2   4  37 174.298 74.3756   2
  -2  -4  37 165.147 87.9595   3
   2  -4 -37 0.52418 46.6233   4
   2   4  38 4.84823 42.5227   2
  -2  -4  38-28.5869 44.8177   3
   2   4  39 236.897 90.3261   2
   2  -4 -39-22.5806 71.4540   4
   2  -5  41 254.296 104.237   2
   2   5 -41 123.269 92.1286   4
   2  -5  40 141.999 89.0861   2
   2   5 -40 154.526 98.0992   4
   2  -5  39 474.195 131.954   2
   2   5 -39 510.569 157.760   4
   2  -5  38 62.9209 60.5264   2
   2   5 -38 117.349 97.5115   5
   2   5 -38 10.8105 47.9936   4
   2  -5  37 114.792 79.8740   2
   2   5 -37 216.024 101.043   5
   2   5 -37-7.10856 40.7932   4
   2  -5  36 547.988 116.975   2
   2   5 -36 442.034 137.697   5
   2   5 -36 245.623 104.181   4
   2  -5  35 403.053 105.017   2
   2   5 -35 334.180 119.434   5
   2   5 -35 484.618 151.019   4
   2  -5  34 644.156 129.763   2
   2   5 -34 775.176 178.063   5
   2   5 -34 476.046 132.130   4
   2  -5  33 332.836 89.9589   2
   2   5 -33 96.7753 90.5034   5
   2   5 -33 189.036 92.7475   4
   2  -5  32 118.813 58.3792   2
   2   5 -32 157.172 93.0630   5
   2   5 -32 196.604 101.065   4
   2  -5  31 410.115 96.2310   2
  -2  -5 -31 336.865 147.636   1
   2   5 -31 538.910 136.987   5
   2   5 -31 457.593 122.133   4
   2  -5  30 114.535 55.9606   2
  -2  -5 -30 260.321 123.832   1
   2   5 -30 129.124 71.2006   5
   2   5 -30 175.291 83.5665   4
   2  -5  29 465.744 93.2223   2
  -2  -5 -29 187.268 113.064   1
   2   5 -29 438.755 125.216   5
   2   5 -29 323.389 100.972   4
  -2  -5 -28 950.869 240.670   1
   2  -5  28 797.736 118.323   2
   2   5 -28 825.147 167.790   5
   2   5 -28 861.684 163.639   4
  -2  -5 -27 805.450 52.2114   3
   2  -5  27 1323.73 146.766   2
  -2  -5 -27 1167.18 241.590   1
   2   5 -27 1538.47 221.291   5
   2   5 -27 1140.11 187.462   4
  -2  -5 -26 501.671 60.5851   3
  -2  -5 -26 477.380 158.154   1
   2  -5  26 490.851 92.8310   2
   2   5 -26 433.730 125.323   5
   2   5 -26 515.498 132.801   4
   2  -5  25 999.804 128.170   2
  -2  -5 -25 1091.61 225.620   1
   2   5 -25 1246.26 195.542   5
  -2  -5 -25 975.723 97.0860   3
   2  -5  24 2069.89 177.562   2
  -2  -5 -24 2210.30 315.823   1
   2   5 -24 2294.53 266.073   5
  -2  -5 -24 2249.18 165.259   3
  -2  -5 -23 3077.54 375.856   1
   2  -5  23 3071.63 205.318   2
   2   5 -23 3126.47 299.268   5
  -2  -5 -23 3069.55 205.324   3
   2  -5  22 2229.70 171.481   2
   2   5 -22 2212.16 186.712   2
  -2  -5 -22 2090.71 297.880   1
   2   5 -22 2446.67 261.330   5
  -2  -5 -22 1816.18 164.413   3
  -2  -5 -21 537.290 96.9612   3
   2  -5  21 781.133 153.769   3
   2   5 -21 521.683 97.0508   2
  -2  -5 -21 502.952 147.700   1
   2  -5  21 628.521 96.2406   2
   2   5 -21 739.183 145.910   5
   2  -5  20 1421.55 131.871   2
   2  -5  20 1651.48 210.525   3
  -2  -5 -20 1328.55 232.161   1
   2   5 -20 1280.84 144.513   2
   2   5 -20 1173.86 176.647   5
  -2  -5 -20 1385.91 149.003   3
   2  -5  19 1128.15 115.729   2
   2  -5  19 1183.97 178.582   3
   2   5 -19 1096.65 130.803   2
  -2  -5 -19 1065.31 204.699   1
   2   5 -19 1217.24 178.730   5
  -2  -5 -19 1096.50 137.650   3
   2  -5  18 806.702 146.200   3
  -2  -5 -18 432.153 140.173   1
   2   5 -18 583.172 98.9644   2
   2  -5  18 551.164 79.5823   2
   2   5 -18 611.513 127.135   5
  -2  -5 -18 400.034 86.4422   3
   2  -5  17 2987.49 177.657   2
   2  -5  17 2911.33 277.079   3
   2   5 -17 2770.10 207.825   2
  -2  -5 -17 2582.98 310.219   1
   2   5 -17 3054.70 277.158   5
  -2   5  17 2509.42 217.619   5
  -2  -5 -17 2560.74 217.405   3
   2  -5  16 2264.05 152.273   2
   2  -5  16 2535.47 257.568   3
   2   5 -16 1908.31 181.548   2
   2   5 -16 2485.24 246.920   5
  -2   5  16 2281.82 204.471   5
  -2  -5 -16 2021.27 192.659   3
   2  -5  15 598.658 128.018   3
   2   5 -15 496.439 90.0677   2
   2  -5  15 442.242 69.9172   2
   2   5 -15 490.369 116.965   5
  -2  -5 -15 489.646 136.416   5
  -2  -5 -15 497.692 105.453   3
  -2   5  15 482.987 93.9645   5
   2  -5  14 831.649 146.330   3
   2  -5  14 542.097 73.5604   2
   2   5 -14 671.490 134.853   5
  -2  -5 -14 600.863 136.596   5
  -2   5  14 571.248 100.752   5
  -2  -5 -14 587.558 104.883   3
   2  -5  13 38.3331 45.4918   3
   2   5 -13 81.4582 59.5012   5
  -2  -5 -13 138.214 81.8739   5
  -2   5  13-8.38652 24.7780   5
   2  -5  13 7.50426 17.5025   2
   2  -5  12 4269.14 195.905   2
   2  -5  12 4572.05 337.808   3
  -2  -5 -12 4322.58 354.099   5
  -2   5  12 4272.32 271.770   5
   2   5 -12 4075.83 303.664   5
   2  -5  11 7196.51 418.463   3
   2  -5  11 6543.72 240.941   2
  -2  -5 -11 6119.11 415.578   5
   2   5 -11 6961.38 393.422   5
  -2   5  11 6159.46 327.617   5
   2  -5  10 1473.11 190.112   3
   2  -5  10 1170.51 100.234   2
  -2  -5 -10 1138.85 177.358   5
   2   5 -10 1247.72 168.417   5
  -2   5  10 1156.91 141.727   5
   2  -5   9 881.957 140.455   3
   2  -5   9 894.305 86.5366   2
  -2  -5  -9 780.498 147.700   5
   2   5  -9 735.998 128.112   5
  -2   5   9 876.548 124.618   5
   2  -5   8 2398.10 235.187   3
   2  -5   8 2321.28 138.997   2
   2   5  -8 2427.85 233.536   5
  -2   5   8 2270.64 198.525   5
  -2  -5  -8 2348.32 249.080   5
   2  -5   7 891.169 140.701   3
   2  -5   7 863.161 84.7569   2
  -2  -5  -7 651.788 127.973   5
   2   5  -7 881.906 142.627   5
  -2   5   7 545.381 98.2682   5
   2  -5   6 4046.70 299.866   3
  -2   5   6 4083.88 265.535   5
  -2  -5  -6 4040.36 313.570   5
   2   5  -6 3907.31 292.526   5
  -2   5   6 3564.88 215.731   4
   2  -5   5 694.964 127.407   3
  -2   5   5 585.770 99.9265   5
   2   5  -5 701.134 122.261   5
  -2  -5  -5 531.347 113.658   5
  -2   5   5 504.858 81.6977   4
   2  -5   4 988.199 145.666   3
  -2   5   4 828.916 121.527   5
   2   5  -4 737.832 132.305   5
  -2  -5  -4 803.445 137.790   5
  -2   5   4 831.173 104.117   4
  -2   5   3 741.559 106.814   3
   2  -5   3 956.478 145.253   3
  -2  -5  -3 838.672 137.889   5
   2   5  -3 862.183 143.338   5
  -2   5   3 772.720 118.188   5
  -2   5   3 767.369 99.1876   4
  -2   5   2 598.677 100.332   3
   2  -5   2 408.296 98.1513   3
   2   5  -2 323.031 97.0065   5
  -2  -5  -2 340.315 86.8751   5
  -2   5   2 350.947 69.9493   4
   2  -5   1 7117.51 389.480   3
   2   5  -1 6468.62 387.706   5
  -2  -5  -1 6710.34 384.249   5
  -2   5   1 6146.84 280.454   4
   2  -5   0 5584.09 348.786   3
   2   5   0 5192.44 348.162   5
  -2  -5   0 5552.00 347.759   5
  -2   5   0 5122.39 255.923   4
   2  -5  -1 7015.88 390.383   3
  -2  -5   1 6495.56 374.793   5
   2   5   1 6838.78 402.206   5
  -2   5  -1 6215.72 281.296   4
   2  -5  -2 536.736 111.665   3
   2   5   2 410.644 100.169   5
  -2  -5   2 312.378 83.5772   5
  -2   5  -2 345.283 66.7887   4
   2  -5  -3 941.494 146.892   3
   2   5   3 836.911 148.390   5
  -2  -5   3 788.417 133.196   5
  -2   5  -3 758.988 99.6052   4
   2  -5  -4 936.550 144.300   3
  -2  -5   4 915.583 142.298   5
   2   5   4 681.848 134.877   5
  -2   5  -4 720.212 97.0832   4
   2  -5  -5 763.699 130.656   3
  -2  -5   5 730.307 125.463   5
   2   5   5 744.073 137.633   5
  -2   5  -5 660.444 95.8173   4
   2  -5  -6 3737.51 290.578   3
  -2   5  -6 3569.21 286.144   5
  -2  -5   6 3901.41 288.749   5
   2  -5  -7 694.725 123.060   3
   2  -5  -7 658.490 78.4450   2
  -2   5  -7 728.136 137.989   5
  -2  -5   7 707.107 126.008   5
   2  -5  -7 649.511 108.203   5
   2  -5  -7 671.562 120.155   4
  -2  -5   7 697.428 103.787   4
   2  -5  -8 2343.10 228.368   3
   2  -5  -8 2166.83 143.204   2
   2  -5  -8 2350.31 198.559   5
  -2  -5   8 2271.03 220.987   5
  -2   5  -8 2419.57 242.300   5
  -2  -5   8 2336.69 183.512   4
   2  -5  -8 2241.16 215.207   4
   2  -5  -9 984.986 153.504   3
   2  -5  -9 923.933 95.8695   2
  -2  -5   9 647.251 119.177   5
   2  -5  -9 909.290 124.080   5
   2  -5  -9 636.469 120.050   4
  -2  -5   9 746.713 99.0420   4
   2  -5 -10 1031.12 154.553   3
   2  -5 -10 1038.66 101.613   2
   2  -5 -10 1113.49 135.827   5
  -2  -5  10 1319.28 171.775   5
   2  -5 -10 994.980 151.591   4
  -2  -5  10 1030.05 116.629   4
   2   5  10 1119.77 182.868   5
   2  -5 -11 6615.59 389.943   3
   2  -5 -11 6027.23 247.154   2
   2  -5 -11 6094.40 317.338   5
  -2  -5  11 6664.12 385.550   5
  -2  -5  11 6255.26 284.169   4
   2  -5 -11 6387.04 373.084   4
   2   5  12 3615.51 232.257   2
   2  -5 -12 3575.70 194.780   2
   2  -5 -12 4026.70 257.083   5
  -2  -5  12 4209.43 308.235   5
  -2  -5  12 3772.63 218.221   4
   2  -5 -12 4016.59 301.463   4
   2  -5 -12 4311.17 316.338   3
   2  -5 -13 16.4456 38.9334   3
   2  -5 -13 21.4686 19.7102   2
   2   5  13 41.4778 27.4434   2
   2  -5 -13 46.9912 37.9083   5
  -2  -5  13 30.9110 27.5021   4
   2  -5 -13-43.4285 43.5471   4
   2  -5 -14 464.685 106.894   3
   2  -5 -14 606.251 84.4215   2
   2   5  14 597.545 96.9774   2
   2  -5 -14 664.263 105.380   5
  -2  -5  14 492.144 77.0286   4
   2  -5 -14 583.793 120.488   4
   2  -5 -15 397.872 99.6921   3
   2  -5 -15 467.984 74.2196   2
   2  -5 -15 286.148 112.699   1
   2   5  15 498.564 89.6485   2
   2  -5 -15 474.383 92.3792   5
  -2  -5  15 448.286 74.1130   4
   2  -5 -15 407.525 107.880   4
   2   5  16 2108.56 184.005   2
   2  -5 -16 2162.96 164.255   2
   2  -5 -16 2109.24 265.545   1
   2  -5 -16 2022.24 186.061   5
   2  -5 -16 2069.19 218.021   3
   2  -5 -16 2166.13 238.802   4
   2   5  17 2304.41 196.915   2
   2  -5 -17 2552.18 179.827   2
   2  -5 -17 2448.93 290.959   1
   2  -5 -17 2507.03 208.334   5
   2  -5 -17 2838.74 271.476   4
   2  -5 -17 2273.39 228.582   3
   2  -5 -18 353.490 93.2376   3
   2   5  18 420.366 87.9390   2
   2  -5 -18 281.520 101.367   1
   2  -5 -18 545.268 86.6599   2
   2  -5 -18 358.117 76.6446   5
   2  -5 -18 491.826 123.114   4
   2   5  19 985.872 133.972   2
   2  -5 -19 867.799 141.467   3
   2  -5 -19 993.636 117.639   2
   2  -5 -19 968.329 179.319   1
   2  -5 -19 978.093 130.199   5
   2  -5 -19 1126.95 176.989   4
   2   5  20 1383.37 157.690   2
   2  -5 -20 1510.95 148.993   2
   2  -5 -20 1370.89 233.108   1
   2  -5 -20 1306.42 152.817   5
   2  -5 -20 1570.47 217.187   4
   2  -5 -20 1575.12 185.038   3
   2  -5 -21 407.554 98.5390   3
   2  -5 -21 422.410 136.274   1
   2   5  21 646.082 107.791   2
   2  -5 -21 684.789 103.653   2
   2  -5 -21 385.138 86.1723   5
   2  -5 -21 837.347 167.929   4
   2   5  22 2027.16 197.039   2
   2  -5 -22 1916.27 289.140   1
   2  -5 -22 2014.67 198.060   5
   2  -5 -22 2178.21 270.995   4
   2  -5 -22 1903.99 200.820   3
   2   5  23 2828.95 228.400   2
   2  -5 -23 3103.85 366.080   1
   2  -5 -23 2744.50 235.365   5
   2  -5 -23 3335.03 337.137   4
   2  -5 -23 2890.29 246.713   3
   2   5  24 2292.28 209.003   2
   2  -5 -24 2728.20 343.047   1
   2  -5 -24 2089.35 206.301   5
   2  -5 -24 2480.80 297.461   4
   2  -5 -24 2263.44 215.322   3
   2   5  25 1188.64 155.129   2
   2  -5 -25 1359.78 251.262   1
   2  -5 -25 1213.79 159.708   5
   2  -5 -25 1139.55 150.854   3
   2  -5 -25 1484.82 235.440   4
   2   5  26 515.763 102.755   2
   2  -5 -26 502.569 167.014   1
   2  -5 -26 526.149 109.617   5
   2  -5 -26 368.862 83.0854   3
   2  -5 -26 733.297 176.130   4
   2   5  27 1366.45 166.674   2
   2  -5 -27 1482.72 266.116   1
   2  -5 -27 1276.43 168.534   5
   2  -5 -27 1463.18 263.633   4
   2  -5 -28 867.103 212.557   1
   2   5  28 775.860 128.730   2
   2  -5 -28 790.251 134.611   5
   2  -5 -28 962.134 217.323   4
   2   5  29 343.088 86.2034   2
   2  -5 -29 467.674 154.734   4
   2   5  30 107.576 58.5337   2
   2  -5 -30 274.718 133.991   4
   2   5  31 230.229 75.0699   2
   2  -5 -31 384.727 168.613   4
   2   5  32 190.198 71.8210   2
   2  -5 -32 342.702 162.832   4
   2   5  33 59.0315 43.8496   2
   2  -5 -33 421.807 154.125   4
   2   5  34 470.713 121.870   2
   2  -5 -34 619.054 201.822   4
   2   5  35 389.414 107.894   2
   2  -5 -35 540.878 177.861   4
   2   5  36 435.129 111.823   2
   2  -5 -36 364.653 143.278   4
   2   5  37 124.686 55.9698   2
   2  -5 -37 194.685 113.413   4
   2   5  38-49.0774 49.9481   2
  -2  -5  38 11.6974 53.8719   3
   2  -6  41-77.2557 103.415   2
   2  -6  40 228.543 109.542   2
   2  -6  39 44.2855 64.5930   2
   2  -6  38 38.8858 59.8266   2
   2   6 -37 359.765 146.795   5
   2  -6  37 272.540 96.0583   2
   2   6 -36 397.821 154.995   5
   2  -6  36 134.897 78.3957   2
   2   6 -35 697.557 177.566   5
   2  -6  35 151.053 65.4153   2
   2   6 -34 337.122 140.856   5
   2  -6  34 174.965 72.9989   2
  -2  -6 -34 215.053 147.377   1
   2   6 -33 130.676 93.3510   5
   2  -6  33 90.5906 51.3083   2
  -2  -6 -33 119.028 121.548   1
   2   6 -32 29.0903 67.9605   5
   2  -6  32 63.3143 29.9700   2
  -2  -6 -32 65.4075 55.6018   1
   2   6 -31 513.893 152.382   5
   2  -6  31 605.585 111.444   2
  -2  -6 -31 513.057 174.989   1
   2   6 -30 47.2336 62.4026   5
  -2  -6 -30 121.551 78.5055   1
   2  -6  30 140.377 67.2005   2
   2   6 -29 1006.58 189.544   5
  -2  -6 -29 716.748 211.071   1
   2  -6  29 1009.32 138.959   2
   2   6 -28 121.304 76.0954   5
   2  -6  28 341.849 85.9914   2
  -2  -6 -28 166.273 110.142   1
   2   6 -27 2043.34 272.925   5
   2  -6  27 1914.61 177.615   2
  -2  -6 -27 1815.92 313.096   1
  -2  -6 -26 502.196 81.3948   3
   2   6 -26 722.409 163.253   5
  -2  -6 -26 601.718 178.163   1
   2  -6  26 656.101 108.546   2
  -2  -6 -25 356.525 75.4098   3
   2   6 -25 409.331 122.927   5
   2  -6  25 444.840 88.8598   2
  -2  -6 -25 482.388 158.864   1
  -2  -6 -24 184.856 60.6235   3
  -2  -6 -24 186.221 100.298   1
   2  -6  24 209.582 62.2477   2
   2   6 -24 246.951 92.8356   5
   2  -6  23 1329.41 135.299   2
  -2  -6 -23 1278.87 249.119   1
   2   6 -23 1626.13 230.504   5
  -2  -6 -23 1463.86 158.570   3
   2  -6  22 1006.73 115.813   2
  -2  -6 -22 949.742 220.468   1
   2   6 -22 1294.00 206.984   5
  -2  -6 -22 919.941 131.873   3
   2   6 -21 172.465 57.9078   2
  -2  -6 -21 68.8598 57.2517   1
   2  -6  21 248.780 56.6309   2
   2   6 -21 238.167 104.277   5
  -2  -6 -21 171.438 64.7867   3
   2  -6  20 1428.88 128.875   2
   2   6 -20 1342.31 146.364   2
  -2  -6 -20 1527.45 271.607   1
   2   6 -20 1441.77 211.230   5
  -2  -6 -20 1627.59 179.778   3
  -2  -6 -19 665.350 182.103   1
   2   6 -19 748.915 105.153   2
   2  -6  19 582.994 85.4202   2
   2   6 -19 831.976 164.904   5
  -2  -6 -19 892.611 136.419   3
  -2  -6 -18 386.981 125.487   1
   2   6 -18 388.550 80.5826   2
   2  -6  18 553.344 81.9236   2
   2   6 -18 653.162 141.227   5
  -2  -6 -18 553.403 110.271   3
   2  -6  17 3258.46 178.851   2
   2   6 -17 3406.81 227.629   2
   2   6 -17 3574.20 327.040   5
  -2  -6 -17 3236.68 262.075   3
   2  -6  16 2891.31 164.061   2
   2   6 -16 3181.05 303.813   5
   2   6 -16 2725.53 206.367   2
   2   6 -15 266.499 107.103   5
   2   6 -15 78.6963 45.1382   2
   2  -6  15 221.994 48.7587   2
   2  -6  14 1664.94 116.670   2
   2   6 -14 1986.73 240.069   5
   2   6 -14 1691.84 156.772   2
   2  -6  13 5263.48 201.569   2
   2   6 -13 6010.30 406.570   5
   2  -6  12 4415.55 180.609   2
   2   6 -12 4476.15 352.567   5
   2  -6  11 2346.20 131.474   2
   2  -6  11 2728.61 285.967   3
   2   6 -11 2526.12 264.805   5
   2  -6  10 3940.77 163.833   2
   2  -6  10 4251.32 345.866   3
   2   6 -10 4794.85 359.565   5
  -2  -6 -10 3965.95 347.623   5
   2  -6   9 676.932 68.3957   2
   2  -6   9 732.123 145.626   3
  -2  -6  -9 500.631 122.824   5
   2   6  -9 622.091 133.773   5
   2  -6   8 3350.25 295.942   3
   2  -6   8 2798.97 135.548   2
   2   6  -8 2756.98 277.533   5
  -2  -6  -8 2811.77 287.386   5
   2  -6   7 2069.60 232.462   3
   2  -6   7 2187.61 118.764   2
  -2  -6  -7 2219.57 251.798   5
   2   6  -7 2304.94 251.312   5
   2  -6   6 1445.69 97.0964   2
   2  -6   6 1517.65 196.269   3
  -2  -6  -6 1411.24 201.713   5
   2   6  -6 1643.28 205.408   5
   2  -6   5 1047.16 162.763   3
   2  -6   5 853.701 74.6153   2
   2   6  -5 919.523 161.739   5
  -2  -6  -5 1006.29 173.484   5
   2  -6   4 1373.40 184.331   3
  -2  -6  -4 1197.41 185.884   5
   2   6  -4 1242.77 186.357   5
   2  -6   3 670.740 125.501   3
  -2  -6  -3 766.583 154.648   5
   2   6  -3 629.342 142.061   5
   2  -6   2 2173.20 229.581   3
   2   6  -2 2462.61 255.835   5
  -2  -6  -2 1915.36 226.461   5
  -2   6   2 1934.32 149.731   4
   2  -6   1 994.844 153.095   3
  -2  -6  -1 735.050 140.977   5
   2   6  -1 1107.78 176.866   5
  -2   6   1 752.347 129.298   5
  -2   6   1 910.100 102.693   4
   2  -6   0 634.284 124.628   3
  -2  -6   0 527.237 115.725   5
   2   6   0 618.039 134.286   5
  -2   6   0 621.520 122.140   5
  -2   6   0 465.701 71.3179   4
   2  -6  -1 857.770 141.657   3
  -2   6  -1 1028.56 157.946   5
   2   6   1 784.647 148.494   5
  -2  -6   1 933.707 156.664   5
  -2   6  -1 933.126 103.488   4
   2  -6  -2 2163.34 225.030   3
  -2   6  -2 2123.60 225.886   5
  -2  -6   2 2173.97 238.967   5
   2   6   2 2143.72 247.289   5
  -2   6  -2 2063.55 154.528   4
   2  -6  -3 579.941 112.521   3
   2  -6  -3 513.729 61.9972   2
   2   6   3 558.611 128.102   5
  -2   6  -3 554.853 116.923   5
  -2  -6   3 485.390 104.633   5
  -2   6  -3 557.323 80.6961   4
   2  -6  -4 1272.88 176.786   3
   2  -6  -4 1313.67 97.1911   2
  -2  -6   4 1383.75 187.288   5
  -2   6  -4 901.007 153.546   5
   2   6   4 1503.30 213.206   5
  -2   6  -4 1110.67 113.689   4
   2  -6  -5 1130.58 168.925   3
   2  -6  -5 1059.94 86.1215   2
  -2   6  -5 937.878 158.348   5
  -2  -6   5 990.097 158.892   5
  -2   6  -5 766.022 94.1716   4
   2   6   5 910.989 165.562   5
   2  -6  -6 1636.48 200.806   3
   2  -6  -6 1368.51 101.763   2
  -2   6  -6 1398.12 194.678   5
  -2  -6   6 1494.08 194.439   5
   2  -6  -6 1439.23 178.512   5
   2   6   6 1521.19 211.547   5
  -2   6  -6 1362.75 130.736   4
   2  -6  -7 2301.77 238.185   3
   2  -6  -7 2130.68 127.930   2
   2  -6  -7 2082.89 213.035   5
   2   6   7 2497.42 276.641   5
  -2   6  -7 2191.29 245.519   5
  -2  -6   7 2499.68 254.059   5
  -2   6  -7 2208.93 165.423   4
  -2  -6   7 2346.09 183.457   4
   2  -6  -7 2553.72 238.006   4
   2  -6  -8 3138.19 282.431   3
   2  -6  -8 2640.29 144.614   2
   2  -6  -8 2956.37 250.408   5
   2   6   8 2743.68 291.910   5
  -2  -6   8 2569.55 254.771   5
  -2   6  -8 2633.12 272.107   5
  -2  -6   8 2572.80 187.157   4
   2  -6  -8 2530.84 236.985   4
  -2   6  -8 2486.28 177.501   4
   2  -6  -9 724.100 137.639   3
   2  -6  -9 649.138 75.6485   2
  -2   6  -9 594.420 145.508   5
   2  -6  -9 643.312 117.148   5
  -2  -6   9 681.544 134.673   5
   2   6   9 705.093 157.978   5
   2  -6  -9 672.095 124.922   4
  -2  -6   9 533.736 83.8073   4
   2  -6 -10 4511.31 339.713   3
   2  -6 -10 3690.77 180.471   2
  -2   6 -10 3685.60 332.278   5
  -2  -6  10 3988.61 325.886   5
   2  -6 -10 3964.99 289.081   5
   2   6  10 4380.97 383.888   5
   2  -6 -10 4199.66 313.144   4
  -2  -6  10 3673.46 213.227   4
   2  -6 -11 2070.49 233.631   3
   2   6  11 2072.22 177.511   2
   2  -6 -11 2143.67 142.259   2
  -2  -6  11 2646.03 263.942   5
  -2   6 -11 2442.79 271.453   5
   2   6  11 2389.29 287.582   5
   2  -6 -11 1993.23 204.150   5
  -2  -6  11 2145.31 158.853   4
   2  -6 -11 2265.60 232.387   4
   2  -6 -12 4925.74 355.436   3
   2   6  12 4167.85 251.168   2
   2  -6 -12 4267.63 203.848   2
   2  -6 -12 4608.40 308.181   5
  -2   6 -12 4436.54 372.823   5
   2   6  12 4949.11 416.030   5
  -2  -6  12 4359.51 346.480   5
  -2  -6  12 4341.53 221.620   4
   2  -6 -12 4538.23 333.785   4
   2  -6 -13 5643.10 381.540   3
   2   6  13 5342.18 285.779   2
   2  -6 -13 5670.31 239.603   2
   2  -6 -13 5360.45 333.731   5
  -2   6 -13 6058.25 440.919   5
  -2  -6  13 5173.68 238.457   4
   2  -6 -13 6103.26 385.438   4
   2  -6 -14 1879.97 224.406   3
   2   6  14 1903.30 172.203   2
   2  -6 -14 1937.50 144.685   2
   2  -6 -14 2157.05 215.795   5
  -2   6 -14 2046.59 258.953   5
  -2  -6  14 1597.63 130.847   4
   2  -6 -14 2125.31 236.128   4
   2  -6 -15 156.517 70.8535   3
   2   6  15 207.815 72.3536   2
   2  -6 -15 237.756 57.7286   2
   2  -6 -15 298.377 86.3039   5
   2  -6 -15 243.248 94.4497   4
   2   6  16 2840.20 216.093   2
   2  -6 -16 2621.29 176.358   2
   2  -6 -16 2859.34 338.515   1
   2  -6 -16 2953.92 249.195   5
   2  -6 -16 2771.71 275.780   4
   2  -6 -16 3047.43 285.831   3
   2   6  17 3288.26 231.518   2
   2  -6 -17 3343.64 364.505   1
   2  -6 -17 3195.39 199.301   2
   2  -6 -17 3207.80 260.588   5
   2  -6 -17 3514.76 312.810   4
   2  -6 -17 3332.43 290.981   3
   2  -6 -18 308.215 93.7604   3
   2  -6 -18 450.802 129.689   1
   2   6  18 463.638 94.7320   2
   2  -6 -18 506.710 85.7449   2
   2  -6 -18 450.083 98.9382   5
   2  -6 -18 550.825 131.652   4
   2  -6 -19 856.398 149.663   3
   2  -6 -19 795.043 107.352   2
   2  -6 -19 715.676 176.627   1
   2   6  19 789.761 122.313   2
   2  -6 -19 804.927 135.398   5
   2  -6 -19 1092.67 187.325   4
   2  -6 -20 1317.96 139.534   2
   2   6  20 1235.26 147.767   2
   2  -6 -20 1342.50 243.477   1
   2  -6 -20 1512.35 184.471   5
   2  -6 -20 1565.34 200.953   3
   2  -6 -20 1329.64 209.289   4
   2  -6 -21 133.276 53.2740   3
   2   6  21 194.395 71.6582   2
   2  -6 -21 129.104 89.8090   1
   2  -6 -21 177.480 54.2788   2
   2  -6 -21 155.385 62.0215   5
   2  -6 -21 294.644 106.659   4
   2  -6 -22 967.033 152.707   3
   2   6  22 819.298 125.093   2
   2  -6 -22 790.681 191.360   1
   2  -6 -22 888.753 142.316   5
   2  -6 -22 823.991 177.633   4
   2   6  23 1296.37 154.173   2
   2  -6 -23 1038.06 223.648   1
   2  -6 -23 1207.74 168.288   5
   2  -6 -23 1555.32 233.424   4
   2  -6 -23 1261.54 171.708   3
   2  -6 -24 251.594 79.7750   3
   2  -6 -24 230.110 124.376   1
   2   6  24 285.134 75.8501   2
   2  -6 -24 155.601 59.4736   5
   2  -6 -24 258.084 106.632   4
   2  -6 -25 349.352 139.425   1
   2   6  25 395.554 92.4678   2
   2  -6 -25 439.705 97.6649   5
   2  -6 -25 593.538 155.351   4
   2   6  26 497.423 106.449   2
   2  -6 -26 684.614 195.422   1
   2  -6 -26 482.592 115.020   5
   2  -6 -26 865.179 186.203   4
   2  -6 -27 2256.16 337.805   1
   2   6  27 1797.16 196.926   2
   2  -6 -27 2078.70 296.200   4
   2  -6 -28 260.395 118.442   1
   2   6  28 383.126 95.1144   2
   2  -6 -28 405.044 144.936   4
   2  -6 -29 790.741 212.509   1
   2   6  29 933.966 149.152   2
   2  -6 -29 1273.71 245.785   4
   2   6  30 53.3110 48.7582   2
   2  -6 -30-14.9136 83.8941   1
   2  -6 -30-83.2762 80.1469   4
   2  -6 -31 516.885 173.446   1
   2   6  31 391.796 101.341   2
   2  -6 -31 755.460 209.034   4
   2   6  32-63.3773 59.2754   2
   2  -6 -32-33.1901 67.9370   4
   2   6  33-4.00662 38.1062   2
   2  -6 -33-38.8409 69.0215   4
   2   6  34 213.602 87.0157   2
   2  -6 -34 212.285 96.4107   4
   2   6  35 460.883 118.319   2
   2  -6 -35 398.989 158.141   4
   2   6  36 74.7974 62.7043   2
   2  -6 -36 215.113 124.288   4
   2   6  37 205.344 88.4043   2
   2  -7  37 88.1585 67.0010   2
   2   7 -37 206.603 132.288   5
   2  -7  36 220.163 93.2446   2
   2   7 -36 425.421 165.390   5
  -2  -7 -35 172.593 173.804   1
   2  -7  35 157.147 77.1186   2
   2   7 -35 229.486 120.931   5
   2  -7  34 52.9222 44.9942   2
  -2  -7 -34 116.386 120.844   1
   2   7 -34 92.6273 95.0625   5
   2  -7  33-27.8332 37.4073   2
  -2  -7 -33 118.104 120.164   1
   2   7 -33-12.3560 69.0108   5
   2  -7  32 193.494 69.2201   2
  -2  -7 -32 110.785 92.6043   1
   2   7 -32 102.682 79.0419   5
   2  -7  31 69.9726 54.1207   2
  -2  -7 -31-58.9289 107.152   1
   2   7 -31 32.7547 48.3777   5
   2  -7  30 250.968 74.8372   2
  -2  -7 -30 228.936 151.444   1
   2   7 -30 388.002 128.315   5
   2  -7  29 222.078 64.5528   2
  -2  -7 -29 311.826 156.530   1
   2   7 -29 226.307 102.664   5
   2  -7  28 605.551 105.727   2
  -2  -7 -28 549.545 191.618   1
   2   7 -28 636.993 159.887   5
  -2  -7 -27 426.665 196.212   1
   2  -7  27 188.770 55.3873   2
   2   7 -27 293.057 106.418   5
   2  -7  26 439.455 84.7929   2
  -2  -7 -26 405.684 167.689   1
   2   7 -26 381.020 116.337   5
   2  -7  25 2.67138 20.7018   2
  -2  -7 -25 37.0130 129.616   1
   2   7 -25 8.44971 42.5606   5
   2  -7  24 335.041 72.5711   2
  -2  -7 -24 381.509 149.848   1
   2   7 -24 433.280 131.574   5
  -2  -7 -24 354.134 82.0314   3
   2  -7  23 679.366 99.0872   2
  -2  -7 -23 529.178 166.249   1
   2   7 -23 544.354 144.423   5
  -2  -7 -23 355.469 94.3441   3
   2  -7  22 2380.99 171.637   2
  -2  -7 -22 2171.00 340.547   1
   2   7 -22 2530.91 305.462   5
  -2  -7 -22 2518.28 228.657   3
   2  -7  21 639.707 86.2381   2
   2   7 -21 622.857 97.3022   2
  -2  -7 -21 571.092 167.346   1
   2   7 -21 859.669 183.231   5
  -2  -7 -21 675.635 123.791   3
   2  -7  20 75.4175 32.5484   2
  -2  -7 -20-10.3981 59.1758   1
   2   7 -20 29.4574 27.7461   2
   2   7 -20 128.150 96.0379   5
  -2   7  20-7.90587 34.1051   5
  -2  -7 -20 74.0440 79.7748   3
   2   7 -19 80.9702 38.0598   2
   2  -7  19 72.4332 37.1171   2
   2   7 -19 75.2849 75.8012   5
  -2   7  19 83.5171 60.5681   5
  -2  -7 -19 10.0700 35.1145   3
   2  -7  18 1978.16 136.461   2
   2   7 -18 1894.80 164.647   2
  -2   7  18 1895.42 234.225   5
   2   7 -18 2097.46 269.865   5
   2  -7  17 874.666 90.9360   2
   2   7 -17 596.742 95.2693   2
   2   7 -17 736.002 170.464   5
  -2   7  17 647.416 135.477   5
   2   7 -16 3808.69 363.753   5
  -2   7  16 3768.87 319.288   5
   2  -7  16 3577.63 170.466   2
   2   7 -16 3431.72 220.531   2
   2   7 -15 1516.13 234.842   5
  -2   7  15 1426.66 198.532   5
   2  -7  15 1528.17 109.661   2
   2   7 -15 1330.42 139.006   2
  -2   7  14 1380.22 196.798   5
   2   7 -14 1808.13 246.471   5
   2  -7  14 1455.74 103.510   2
   2   7 -14 1387.57 137.912   2
  -2   7  13 2870.33 278.547   5
   2   7 -13 3150.57 324.429   5
   2   7 -13 2813.00 208.718   2
   2  -7  13 3185.31 144.726   2
   2  -7  12 6832.23 200.893   2
  -2   7  12 7031.47 433.623   5
   2   7 -12 7691.26 500.784   5
   2  -7  11 1536.35 94.9474   2
  -2   7  11 1508.53 206.870   5
   2   7 -11 1710.86 232.238   5
   2  -7  10 517.025 54.3932   2
  -2   7  10 577.683 126.516   5
   2   7 -10 574.122 138.289   5
   2  -7   9 561.767 54.0580   2
  -2   7   9 578.167 131.913   5
   2   7  -9 610.537 140.079   5
   2  -7   8 1429.32 78.1054   2
   2   7  -8 1924.62 249.270   5
  -2   7   8 1363.36 191.311   5
   2  -7   7 3946.94 122.790   2
  -2   7   7 3665.19 310.297   5
   2   7  -7 4120.43 363.844   5
   2  -7   6 2282.78 90.1737   2
  -2   7   6 1921.55 226.670   5
   2   7  -6 2569.27 289.128   5
   2  -7   5 1686.26 75.9822   2
   2   7  -5 1477.22 217.429   5
  -2   7   5 1334.31 189.200   5
   2  -7   4 1683.05 76.4359   2
  -2   7   4 1656.91 210.388   5
   2   7  -4 1936.28 245.468   5
   2  -7   3 1646.64 78.1881   2
  -2   7   3 1541.18 207.299   5
   2   7  -3 1782.68 242.011   5
  -2   7   2 1509.70 204.520   5
   2   7  -2 1568.16 222.292   5
  -2  -7  -1 1410.87 205.728   5
   2   7  -1 1211.58 192.125   5
  -2   7   1 1404.16 198.597   5
   2  -7   1 1420.79 75.7672   2
   2  -7   0 0.27080 41.1928   3
   2   7   0 56.2889 58.5464   5
  -2  -7   0 36.3714 36.6007   5
  -2   7   0 33.0887 39.7917   5
   2  -7   0 7.80526 10.9937   2
   2  -7  -1 1168.67 171.644   3
   2  -7  -1 1371.13 75.7405   2
  -2  -7   1 1454.58 207.252   5
   2   7   1 1353.28 209.803   5
  -2   7  -1 1341.74 191.610   5
   2  -7  -2 1366.59 193.651   3
   2  -7  -2 1510.04 82.0678   2
   2   7   2 1460.94 223.631   5
  -2   7  -2 1517.89 206.165   5
  -2  -7   2 1275.87 193.567   5
  -2   7  -2 1393.45 116.289   4
   2  -7  -3 1706.60 215.531   3
   2  -7  -3 1701.76 90.1277   2
  -2   7  -3 1614.64 213.107   5
  -2  -7   3 1623.25 223.519   5
   2   7   3 1586.96 231.123   5
  -2   7  -3 1495.31 121.119   4
   2  -7  -4 1848.98 222.699   3
   2  -7  -4 1671.15 92.9367   2
  -2   7  -4 1471.62 204.537   5
  -2  -7   4 1682.84 223.531   5
   2   7   4 1974.88 255.208   5
  -2   7  -4 1677.13 127.050   4
   2  -7  -5 1570.47 207.154   3
   2  -7  -5 1518.16 91.2647   2
  -2  -7   5 1807.26 230.414   5
  -2   7  -5 1500.63 205.609   5
   2   7   5 1482.15 226.024   5
  -2   7  -5 1506.84 119.514   4
   2  -7  -6 2365.04 257.085   3
   2  -7  -6 2090.79 114.460   2
  -2  -7   6 2033.00 249.348   5
   2  -7  -6 2234.86 242.615   5
   2   7   6 2342.90 285.154   5
  -2   7  -6 2249.49 259.603   5
  -2   7  -6 2044.17 140.598   4
  -2  -7   6 2317.15 183.645   4
   2  -7  -7 4119.09 337.519   3
   2  -7  -7 3854.81 157.759   2
  -2  -7   7 4282.83 356.226   5
  -2   7  -7 3968.62 352.506   5
   2   7   7 3676.73 356.816   5
   2  -7  -7 3746.45 311.636   5
  -2   7  -7 3794.53 191.595   4
  -2  -7   7 3896.51 226.844   4
   2  -7  -8 1601.01 214.824   3
   2  -7  -8 1359.78 99.9497   2
   2  -7  -8 1233.66 184.666   5
  -2  -7   8 1421.63 205.743   5
  -2   7  -8 1507.22 221.839   5
   2   7   8 1489.48 231.830   5
  -2   7  -8 1301.21 112.595   4
  -2  -7   8 1388.31 129.917   4
   2  -7  -8 1472.17 184.204   4
   2  -7  -9 539.979 124.944   3
   2  -7  -9 619.081 70.8310   2
   2  -7  -9 514.685 116.543   5
  -2  -7   9 518.862 124.079   5
  -2   7  -9 506.322 138.686   5
   2   7   9 481.946 132.992   5
   2  -7  -9 648.137 122.861   4
  -2  -7   9 427.398 67.8919   4
  -2   7  -9 478.398 68.1034   4
   2  -7 -10 506.040 116.612   3
   2   7  10 431.587 78.8176   2
   2  -7 -10 393.486 57.2405   2
  -2  -7  10 390.917 115.717   5
   2  -7 -10 574.199 122.913   5
  -2   7 -10 514.234 131.614   5
   2   7  10 487.183 136.558   5
   2  -7 -10 402.065 107.049   4
  -2   7 -10 366.864 59.1262   4
  -2  -7  10 465.875 71.9553   4
   2  -7 -11 1367.17 200.354   3
   2   7  11 1164.87 131.077   2
   2  -7 -11 1284.24 107.463   2
  -2  -7  11 1501.63 223.702   5
  -2   7 -11 1529.91 233.155   5
   2  -7 -11 1280.23 179.582   5
   2  -7 -11 1224.97 180.265   4
  -2  -7  11 1245.03 112.314   4
   2   7  11 1290.20 224.624   5
  -2   7 -11 1452.27 127.482   4
   2  -7 -12 6820.40 446.089   3
   2  -7 -12 6205.40 239.314   2
   2   7  12 6666.63 314.032   2
   2  -7 -12 5996.05 385.883   5
   2   7  12 7030.25 521.918   5
  -2   7 -12 6904.73 486.861   5
  -2  -7  12 6630.66 251.312   4
   2  -7 -12 6608.61 409.365   4
  -2   7 -12 6551.43 275.167   4
   2   7  13 2738.91 202.756   2
   2  -7 -13 2843.70 167.820   2
   2  -7 -13 2701.97 279.334   3
  -2   7 -13 3428.47 352.015   5
   2  -7 -13 2696.63 262.822   5
   2   7  13 3134.66 354.888   5
   2  -7 -13 2731.62 274.702   4
   2   7  14 1110.38 129.964   2
   2  -7 -14 1188.85 112.181   2
   2  -7 -14 1265.38 191.032   3
  -2   7 -14 1267.86 217.558   5
   2  -7 -14 1212.19 173.766   5
   2   7  14 1121.76 214.014   5
   2  -7 -14 1304.18 192.926   4
   2   7  15 1322.68 150.085   2
   2  -7 -15 1359.64 198.353   3
   2  -7 -15 1197.40 117.826   2
   2  -7 -15 1303.35 183.098   5
  -2   7 -15 1674.20 254.688   5
   2  -7 -15 1769.15 223.623   4
   2  -7 -16 3621.39 323.633   3
   2  -7 -16 3158.40 192.542   2
   2   7  16 3521.94 235.832   2
   2  -7 -16 3166.96 282.909   5
  -2   7 -16 3191.60 348.555   5
   2  -7 -16 3452.38 311.744   4
   2  -7 -17 879.627 160.671   3
   2   7  17 760.338 115.827   2
   2  -7 -17 714.697 94.9358   2
  -2   7 -17 677.277 177.539   5
   2  -7 -17 871.206 152.711   5
   2  -7 -17 931.542 166.387   4
   2   7  18 2111.62 185.510   2
   2  -7 -18 1725.16 150.981   2
   2  -7 -18 1910.96 286.004   1
  -2   7 -18 1745.27 267.491   5
   2  -7 -18 1827.93 221.070   5
   2  -7 -18 2353.76 268.157   4
   2  -7 -18 1905.91 233.568   3
   2  -7 -19-38.7722 51.1452   3
   2  -7 -19-59.3694 91.8735   1
   2   7  19 3.38833 25.0644   2
   2  -7 -19 11.0933 26.0369   2
  -2   7 -19-89.9286 79.0337   5
   2  -7 -19 9.29147 60.0168   5
   2  -7 -19 22.3317 37.3434   4
   2  -7 -20 33.5731 60.2026   3
   2  -7 -20-97.6790 88.6382   1
   2   7  20 60.5123 41.7330   2
   2  -7 -20 46.6245 35.9985   2
  -2   7 -20 66.7828 62.1749   5
   2  -7 -20 81.4302 75.7687   5
   2  -7 -20 156.703 91.2315   4
   2  -7 -21 579.078 128.015   3
   2  -7 -21 508.901 169.344   1
   2   7  21 464.103 98.0220   2
   2  -7 -21 398.057 82.3918   2
   2  -7 -21 327.845 83.5182   5
  -2   7 -21 626.708 167.028   5
   2  -7 -21 562.456 144.465   4
   2   7  22 2092.86 194.496   2
   2  -7 -22 2351.25 331.720   1
   2  -7 -22 2476.41 258.031   5
  -2   7 -22 2112.88 305.330   5
   2  -7 -22 2431.31 288.333   4
   2  -7 -22 1889.91 226.549   3
   2   7  23 328.176 82.0230   2
   2  -7 -23 490.050 159.759   1
  -2   7 -23 726.383 190.929   5
   2  -7 -23 498.697 124.801   5
   2  -7 -23 527.801 139.291   4
   2   7  24 290.249 72.3236   2
   2  -7 -24 316.697 118.394   1
  -2   7 -24 350.683 123.779   5
   2  -7 -24 656.625 166.038   4
   2  -7 -25 116.103 73.5285   1
   2   7  25 44.4505 45.5299   2
   2  -7 -25 112.710 70.7200   4
   2  -7 -26 341.098 151.014   1
   2   7  26 362.606 91.9964   2
   2  -7 -26 449.426 132.865   4
   2  -7 -27 230.399 125.052   1
   2   7  27 327.382 88.0576   2
   2  -7 -27 479.434 145.494   4
   2  -7 -28 639.100 206.296   1
   2   7  28 582.048 118.161   2
   2  -7 -28 845.381 195.507   4
   2  -7 -29 205.001 121.987   1
   2   7  29 237.813 80.3243   2
   2  -7 -29 308.118 125.215   4
   2  -7 -30 371.292 168.668   1
   2   7  30 315.219 101.140   2
   2  -7 -30 145.255 87.4264   4
   2  -7 -31 25.4032 83.3185   1
   2   7  31 5.98625 35.9435   2
   2  -7 -31 59.7958 70.5249   4
   2   7  32 153.156 69.9052   2
   2  -7 -32 48.3086 66.6473   4
   2  -7 -33 0.64141 111.494   1
   2   7  33 12.5559 38.0296   2
   2  -7 -33 151.702 109.124   4
   2  -7 -34 27.7534 77.7643   1
   2   7  34 140.383 71.3463   2
   2  -7 -34-77.7421 66.0035   4
   2   7  35 182.854 83.0833   2
   2  -7 -35 222.190 122.367   4
   2   7  36 246.995 91.4754   2
   2   8 -36 128.172 120.727   5
   2   8 -35 116.975 121.749   5
   2   8 -34 58.5484 85.4074   5
   2   8 -33-162.080 101.096   5
  -2  -8 -32 163.215 98.5033   1
   2   8 -32 119.158 106.167   5
  -2  -8 -31-113.184 124.513   1
   2   8 -31 2.39368 63.0649   5
  -2  -8 -30 133.937 115.457   1
   2   8 -30 107.655 89.9360   5
  -2  -8 -29 197.851 131.173   1
   2   8 -29 139.504 113.347   5
  -2  -8 -28 150.904 135.347   1
   2   8 -28 106.866 77.4298   5
   2  -8  27 457.077 89.8196   2
  -2  -8 -27 515.739 229.649   1
   2   8 -27 584.745 166.727   5
   2  -8  26 290.325 72.1298   2
  -2  -8 -26 450.582 193.152   1
   2   8 -26 319.659 135.402   5
   2  -8  25 387.272 77.0766   2
  -2  -8 -25 169.681 123.761   1
   2  -8  24 489.348 83.7968   2
  -2  -8 -24 468.229 177.658   1
   2   8 -24 675.893 169.415   5
  -2  -8 -23 360.623 150.068   1
   2  -8  23 585.252 90.8588   2
   2   8 -23 366.379 126.261   5
  -2  -8 -23 422.066 104.791   3
   2  -8  22 27.0727 24.4413   2
  -2  -8 -22-32.7334 34.1021   3
  -2  -8 -21 238.636 139.558   1
   2  -8  21 279.011 58.4996   2
   2   8 -21 278.146 113.001   5
  -2   8  21 473.773 134.686   5
  -2  -8 -21 190.031 69.8374   3
   2   8 -20-20.5016 27.0779   2
   2  -8  20 3.46820 20.8837   2
   2   8 -20 24.3686 64.3705   5
  -2   8  20-61.8516 63.1031   5
   2   8 -19 674.848 98.1012   2
   2  -8  19 765.063 91.3031   2
   2   8 -19 885.168 185.135   5
  -2   8  19 834.605 164.705   5
  -2   8  18 2005.35 260.791   5
   2   8 -18 2421.82 312.403   5
   2   8 -18 1665.68 152.146   2
   2  -8  18 1941.57 134.780   2
   2   8 -17 2619.14 323.470   5
  -2   8  17 2222.04 268.241   5
   2   8 -17 1853.58 157.299   2
   2  -8  17 1881.28 126.094   2
  -2   8  16 140.762 77.9958   5
   2   8 -16 207.503 133.320   5
   2  -8  16 179.578 41.3713   2
   2   8 -16 74.7758 39.5463   2
  -2   8  15 1361.61 210.742   5
   2   8 -15 1378.50 234.580   5
   2  -8  15 1284.22 94.4338   2
   2   8 -15 1236.53 126.744   2
  -2   8  14-12.2568 48.2576   5
   2  -8  14 63.1082 24.2873   2
   2   8 -14 37.9600 30.1653   2
  -2   8  13 2635.88 289.365   5
   2   8 -13 3152.99 345.006   5
   2  -8  13 2680.48 120.475   2
   2   8 -13 2545.35 185.146   2
  -2   8  12 240.217 104.048   5
   2   8 -12 275.860 118.059   5
   2  -8  12 248.986 35.8284   2
   2   8 -12 194.004 48.5293   2
   2   8 -11 484.679 139.972   5
  -2   8  11 577.717 137.603   5
   2  -8  11 491.549 44.7986   2
  -2   8  10 625.529 141.570   5
   2   8 -10 562.832 150.238   5
   2  -8  10 434.423 37.0565   2
   2   8  -9 1893.48 269.355   5
  -2   8   9 2018.23 254.376   5
  -2   8   8 526.543 124.612   5
   2   8  -8 718.296 172.525   5
   2   8  -7 4.40124 56.8909   5
  -2   8   7 9.09024 64.3932   5
   2   8  -6 827.445 179.797   5
  -2   8   6 509.211 124.292   5
   2   8  -5 1084.95 200.707   5
  -2   8   5 902.651 169.611   5
  -2   8   4 1092.22 189.042   5
   2   8  -4 1197.34 213.319   5
  -2   8   3 1229.19 193.648   5
   2   8  -3 1101.44 204.904   5
   2   8  -2 571.351 145.410   5
  -2   8   2 436.061 113.504   5
   2   8  -1 0.73606 71.4734   5
  -2   8   1-21.8718 45.2297   5
  -2   8   0 174.179 76.9806   5
   2   8   0 144.516 79.6388   5
  -2   8  -1 11.2560 56.9225   5
   2   8   1-2.61568 77.1032   5
   2  -8  -2 438.581 29.8721   2
   2   8   2 476.555 138.698   5
  -2   8  -2 551.203 143.729   5
   2  -8  -3 1076.07 55.3362   2
   2   8   3 1224.46 219.081   5
  -2   8  -3 946.343 181.426   5
   2  -8  -4 1044.96 60.9812   2
  -2   8  -4 1199.62 203.222   5
   2   8   4 1232.23 216.393   5
   2  -8  -5 736.203 57.1945   2
  -2   8  -5 769.124 165.813   5
   2   8   5 759.416 175.573   5
   2  -8  -6 617.027 56.4612   2
   2   8   6 940.044 195.205   5
  -2   8  -6 779.268 167.117   5
  -2  -8   6 551.638 82.3748   4
   2  -8  -7 128.687 26.9401   2
   2  -8  -7 244.693 103.427   5
  -2   8  -7 123.380 71.6842   5
   2   8   7 149.183 87.5760   5
  -2  -8   7 124.824 38.5696   4
   2  -8  -8 467.979 56.0057   2
   2  -8  -8 574.180 144.528   5
  -2   8  -8 356.099 114.501   5
   2   8   8 533.745 149.538   5
  -2  -8   8 499.220 71.4586   4
   2  -8  -9 1652.17 108.228   2
   2   8   9 1692.21 153.789   2
   2   8   9 1977.32 284.235   5
   2  -8  -9 2003.86 249.745   5
  -2   8  -9 2026.17 269.729   5
  -2  -8   9 1814.70 128.133   4
  -2   8  -9 1712.73 100.810   4
   2  -8  -9 1799.54 211.694   4
   2   8  10 462.233 84.2391   2
   2  -8 -10 426.808 58.6390   2
   2  -8 -10 548.826 130.112   5
  -2   8 -10 465.588 145.203   5
   2  -8 -10 288.595 85.4151   4
  -2   8 -10 358.172 48.1571   4
   2   8  10 255.743 103.705   5
  -2  -8  10 382.556 55.6904   4
   2   8  11 478.073 82.0262   2
   2  -8 -11 481.479 63.6907   2
   2  -8 -11 855.078 169.639   5
  -2   8 -11 437.969 131.755   5
   2   8  11 704.846 167.416   5
  -2  -8  11 568.502 65.0626   4
  -2   8 -11 551.492 57.7419   4
   2  -8 -11 504.238 107.779   4
   2   8  12 237.070 63.0742   2
   2  -8 -12 316.631 56.7819   2
   2  -8 -12 171.760 66.2280   5
  -2   8 -12 241.437 110.608   5
   2   8  12 262.406 125.566   5
  -2   8 -12 202.598 35.8651   4
   2  -8 -12 218.466 88.7679   4
   2   8  13 2771.91 201.356   2
   2  -8 -13 2575.99 157.251   2
   2  -8 -13 2517.55 274.099   5
  -2   8 -13 2574.96 320.874   5
   2   8  13 2812.68 347.900   5
  -2   8 -13 2705.10 133.946   4
   2  -8 -13 2465.12 262.368   4
   2   8  14 47.1514 49.8319   2
   2  -8 -14 114.537 39.1305   2
   2  -8 -14 120.268 83.1026   5
  -2   8 -14 31.4805 81.1819   5
   2  -8 -14-27.2641 56.5663   4
   2   8  14-18.9478 67.8178   5
  -2   8 -14 11.0054 13.5240   4
   2   8  15 1200.90 138.289   2
   2  -8 -15 1297.80 122.195   2
   2  -8 -15 1567.76 230.307   3
  -2   8 -15 1451.57 242.381   5
   2  -8 -15 1148.10 189.002   5
   2   8  15 1385.17 250.908   5
  -2   8 -15 1318.60 101.184   4
   2  -8 -15 1485.14 214.714   4
   2  -8 -16 333.706 111.610   3
   2   8  16 104.815 63.4310   2
   2  -8 -16 72.3647 37.1348   2
  -2   8 -16 150.712 98.4293   5
   2  -8 -16 147.346 89.1266   5
  -2   8 -16 98.8633 34.7389   4
   2  -8 -16 192.962 95.2347   4
   2  -8 -17 2211.96 269.541   3
   2  -8 -17 2013.25 161.558   2
   2   8  17 2010.78 180.085   2
  -2   8 -17 2282.85 309.234   5
   2  -8 -17 1956.49 243.551   5
   2  -8 -17 2290.18 269.021   4
  -2   8 -17 1904.47 135.185   4
   2  -8 -18 1802.79 157.718   2
   2  -8 -18 1867.40 246.328   3
   2   8  18 2044.83 183.972   2
  -2   8 -18 1673.03 269.311   5
   2  -8 -18 1836.02 244.093   4
   2  -8 -19 860.581 170.395   3
   2  -8 -19 625.948 205.762   1
   2  -8 -19 750.010 106.269   2
   2   8  19 821.371 116.429   2
  -2   8 -19 728.931 191.881   5
   2  -8 -19 786.053 166.826   4
   2  -8 -20 60.1705 96.4698   1
   2   8  20-41.7839 30.8583   2
  -2   8 -20-6.44953 68.9171   5
   2  -8 -20-84.5730 63.6478   4
   2  -8 -21 182.171 94.5487   1
   2   8  21 167.272 59.7422   2
  -2   8 -21 257.464 120.542   5
   2  -8 -21 281.418 110.633   4
   2  -8 -22 58.3364 84.9533   1
   2   8  22 46.7802 41.7895   2
  -2   8 -22 15.3979 65.7730   5
   2  -8 -22 200.316 98.7758   4
   2  -8 -23 495.863 182.160   1
   2   8  23 472.778 98.2632   2
  -2   8 -23 515.195 151.202   5
   2  -8 -23 542.966 152.034   4
   2  -8 -24 724.694 218.765   1
   2   8  24 334.149 81.5815   2
  -2   8 -24 519.571 166.824   5
   2  -8 -24 356.878 122.927   4
   2  -8 -25 65.0614 93.4863   1
   2   8  25 372.111 87.3850   2
  -2   8 -25 432.193 166.365   5
   2  -8 -25 415.971 141.871   4
   2   8  26 251.257 68.4556   2
   2  -8 -26 747.704 220.892   1
  -2   8 -26 489.250 177.996   5
   2  -8 -26 356.233 126.123   4
   2  -8 -27 569.104 177.916   1
   2   8  27 340.378 86.3396   2
  -2   8 -27 696.945 198.747   5
   2  -8 -27 527.159 163.389   4
   2  -8 -28 134.318 139.377   1
   2   8  28 91.7140 45.5973   2
  -2   8 -28 63.4544 83.0211   5
   2  -8 -28 274.590 129.601   4
   2  -8 -29 82.3005 80.5876   1
   2   8  29 105.633 51.5914   2
  -2   8 -29 139.749 115.242   5
   2  -8 -30 301.650 144.515   1
   2   8  30 136.352 54.2852   2
  -2   8 -30 55.4278 63.7335   5
   2  -8 -30 292.029 135.267   4
   2   8  31-12.3621 30.1599   2
  -2   8 -31-88.8068 115.430   5
   2  -8 -32 21.1882 66.6633   1
   2   8  32 144.153 69.6479   2
   2  -8 -32 165.846 122.358   4
   2  -8 -33-42.7702 106.320   1
   2   8  33 8.33162 52.0000   2
   2  -8 -33 118.378 114.700   4
   2   8  34 52.1448 66.9449   2
   2   8  35 97.3537 72.8101   2
   2   9 -34 170.726 134.378   5
   2   9 -33 227.397 145.455   5
   2   9 -32 206.368 132.815   5
   2   9 -31 8.57627 56.6306   5
   2   9 -30 77.2039 142.829   5
  -2  -9 -29 72.7575 133.873   1
   2   9 -29 106.942 101.340   5
  -2  -9 -28 545.857 228.211   1
   2   9 -28 131.429 92.2053   5
  -2  -9 -27 161.678 133.482   1
   2   9 -27 603.050 188.956   5
  -2  -9 -26-39.5844 106.835   1
   2   9 -26 99.5237 92.7284   5
  -2  -9 -25 225.918 143.516   1
   2   9 -25 306.103 140.528   5
  -2  -9 -24 11.8981 109.168   1
   2   9 -24 46.1816 72.3817   5
  -2  -9 -23 164.768 102.204   1
   2   9 -23 93.0451 74.9511   5
  -2  -9 -22-24.5843 98.6437   1
   2   9 -22 63.4666 79.1848   5
  -2   9  22-40.5424 53.5880   5
  -2  -9 -22 23.6812 50.2541   3
   2   9 -21 335.933 121.842   5
  -2   9  21 293.600 103.824   5
   2   9 -20 23.5892 95.1404   5
  -2   9  20 88.4745 66.5943   5
   2   9 -19 31.5652 58.1741   5
  -2   9  19 39.4927 43.2077   5
   2   9 -18 951.852 210.723   5
  -2   9  18 797.538 178.595   5
   2   9 -17 960.169 211.186   5
  -2   9  17 865.785 185.226   5
  -2   9  16 77.7130 60.2696   5
   2   9 -16 50.6984 72.2143   5
   2   9 -15 106.342 74.1161   5
  -2   9  15 140.227 72.8799   5
   2   9 -14 466.591 76.4077   2
  -2   9  14 517.302 138.794   5
   2   9 -14 657.042 165.576   5
   2   9 -13-10.0971 24.0407   2
  -2   9  13-67.8889 77.4687   5
   2   9 -13-39.6494 61.4394   5
   2   9 -12 19.2598 17.0380   2
  -2   9  12 122.416 63.9917   5
   2   9 -12 83.5135 82.7450   5
   2   9 -11 87.8668 32.4718   2
  -2   9  11 8.10927 42.5444   5
   2   9 -11 162.766 103.778   5
   2   9 -10 401.428 72.4249   2
   2   9 -10 375.361 141.978   5
  -2   9  10 462.132 129.174   5
   2   9  -9 581.785 163.343   5
  -2   9   9 359.478 125.219   5
   2   9  -8 129.759 93.1023   5
  -2   9   8 394.434 126.443   5
  -2   9   7 104.219 72.7465   5
   2   9  -7 136.120 85.9837   5
   2   9  -6 34.7437 45.9648   5
  -2   9   6-45.2483 86.2629   5
   2   9  -5 124.562 92.3663   5
  -2   9   5 278.326 124.982   5
  -2   9   4-41.6621 63.8319   5
   2   9  -4-255.667 113.496   5
  -2   9   3 18.5112 46.6583   5
   2   9  -3-41.2595 79.1148   5
  -2   9   2 53.2074 56.2193   5
   2   9  -2-24.0395 84.4253   5
   2   9  -1 793.977 189.519   5
  -2   9   1 801.572 167.309   5
  -2   9   0 214.616 108.579   5
   2   9   0 258.878 120.521   5
  -2   9  -1 658.491 152.212   5
   2   9   1 628.711 164.812   5
   2   9   2 26.8044 45.9519   5
  -2   9  -2-23.3117 63.8591   5
  -2   9  -3 84.6109 83.1833   5
   2   9   3 26.0615 67.6905   5
   2   9   4 88.0142 73.0669   5
  -2   9  -4 65.6138 58.7183   5
   2   9   5 299.956 122.380   5
  -2   9  -5 214.546 96.1164   5
  -2  -9   5 169.510 47.4759   4
  -2   9  -6 15.6359 56.4174   5
   2   9   6 150.770 93.5168   5
  -2  -9   6 103.205 29.8965   4
   2  -9  -7 114.744 25.9977   2
  -2   9  -7 244.614 116.155   5
   2   9   7 144.415 112.486   5
  -2  -9   7 128.769 31.6704   4
  -2   9  -8 215.274 81.9395   5
   2   9   8 622.587 182.505   5
   2   9   9 359.947 67.4170   2
  -2   9  -9 535.563 154.846   5
   2   9   9 349.333 137.570   5
   2   9  10 450.317 78.3962   2
  -2   9 -10 528.741 153.479   5
   2  -9 -10 397.860 108.585   4
   2   9  10 533.354 179.609   5
   2   9  11 91.7263 40.5644   2
  -2   9 -11 122.840 72.0342   5
   2  -9 -11 222.964 79.5743   4
   2   9  11 85.9290 81.6667   5
   2   9  12 134.575 48.7304   2
  -2   9 -12 107.060 60.7520   5
   2  -9 -12 152.203 75.5170   4
   2   9  12 88.5776 53.5694   5
   2   9  13 9.42076 34.6440   2
  -2   9 -13 142.101 113.448   5
   2  -9 -13 48.0683 64.0156   4
   2   9  13-44.7425 91.0819   5
   2   9  14 518.366 88.3673   2
  -2   9 -14 459.922 157.351   5
   2  -9 -14 372.193 106.821   4
   2   9  14 551.588 170.446   5
   2   9  15 130.888 53.4087   2
  -2   9 -15 129.911 95.0703   5
   2  -9 -15 84.3367 73.9556   4
   2   9  15-6.73919 113.956   5
   2   9  16 148.054 56.1811   2
  -2   9 -16 88.7095 93.3719   5
   2   9  16 11.5969 62.8408   5
   2  -9 -16 83.5958 66.0091   4
   2   9  17 691.975 105.106   2
  -2   9 -17 1034.92 226.790   5
   2  -9 -17 927.092 180.326   4
   2   9  18 987.455 123.660   2
  -2   9 -18 1281.97 252.345   5
   2  -9 -18 911.033 178.841   4
   2   9  19 23.6170 25.6190   2
  -2   9 -19 35.1392 57.6168   5
   2  -9 -19-81.5747 61.1203   4
   2  -9 -20 0.56374 79.9554   1
   2   9  20 49.4763 39.1938   2
  -2   9 -20-15.6276 64.2444   5
   2  -9 -20 13.3713 42.2952   4
   2  -9 -21 212.878 116.685   1
   2   9  21 256.842 70.9852   2
  -2   9 -21 291.345 113.761   5
   2  -9 -21 249.554 105.427   4
   2  -9 -22-92.3997 90.7919   1
   2   9  22 24.7225 29.6354   2
  -2   9 -22-18.3127 74.0862   5
   2  -9 -22 141.842 93.4837   4
   2  -9 -23 323.417 143.606   1
   2   9  23 99.9976 46.4105   2
  -2   9 -23 201.600 94.2534   5
   2  -9 -23 144.666 96.2845   4
   2  -9 -24 7.24095 60.4642   1
   2   9  24 16.9780 38.4168   2
  -2   9 -24 156.647 93.3719   5
   2  -9 -24 47.0365 57.8019   4
   2  -9 -25 47.4023 100.268   1
   2   9  25 166.270 60.7576   2
  -2   9 -25 282.236 116.671   5
   2  -9 -25 13.1016 71.2736   4
   2  -9 -26 11.9324 65.9605   1
  -2   9 -26-35.0512 92.7145   5
   2  -9 -26 97.9891 67.9333   4
   2  -9 -27 289.590 155.462   1
   2   9  27 440.754 103.603   2
  -2   9 -27 616.390 203.268   5
   2  -9 -27 212.303 112.506   4
   2  -9 -28 75.4940 125.610   1
   2   9  28 118.610 62.3546   2
  -2   9 -28 131.137 82.3561   5
   2  -9 -28 27.7426 66.4868   4
   2  -9 -29-0.66945 94.2327   1
   2   9  29 17.6358 31.0687   2
   2  -9 -29 105.848 80.5765   4
   2  -9 -30 89.5400 98.1325   1
   2   9  30 128.062 76.4619   2
   2  -9 -30 28.3244 60.6200   4
   2   9  31 63.7844 59.8796   2
   2  -9 -31 89.1797 67.2468   4
   2   9  32 340.615 108.989   2
   2   9  33 64.0071 65.5242   2
   2   9  34 58.2898 67.0272   2
   2  10 -30 97.8882 115.412   5
   2  10 -29 70.0540 102.845   5
   2  10 -28 57.2414 71.6027   5
   2  10 -27 20.3652 59.2977   5
   2  10 -26 110.686 119.002   5
  -2 -10 -25 43.5202 104.078   1
   2  10 -25 23.7695 87.2601   5
  -2 -10 -24 211.660 160.466   1
   2  10 -24 185.312 123.017   5
  -2 -10 -23 199.593 170.854   1
   2  10 -23 315.680 139.297   5
  -2  10  23 119.220 89.5532   5
   2  10 -22 707.118 209.700   5
  -2  10  22 588.727 165.137   5
   2  10 -21 261.176 151.194   5
  -2  10  21 120.891 99.1028   5
   2  10 -20-48.7714 73.3055   5
  -2  10  20-63.9051 68.3211   5
   2  10 -19 102.332 103.291   5
  -2  10  19 177.814 81.8980   5
   2  10 -18 520.708 164.062   5
  -2  10  18 413.622 139.955   5
   2  10 -17 202.870 110.753   5
  -2  10  17 92.7823 72.9803   5
  -2  10  16 39.7225 68.9662   5
   2  10 -16 7.60974 65.3259   5
  -2  10  15 158.102 97.6213   5
   2  10 -15 319.813 128.393   5
  -2  10  14 601.684 169.027   5
   2  10 -14 648.345 189.503   5
  -2  10  13 533.359 162.255   5
   2  10 -13 537.819 170.625   5
   2  10 -12 127.859 117.659   5
  -2  10  12 59.9922 41.4868   5
   2  10 -11 510.324 180.975   5
  -2  10  11 329.516 110.660   5
   2  10 -10 555.089 170.368   5
  -2  10  10 436.082 143.788   5
   2  10  -9 20.0060 71.7480   5
  -2  10   9 65.6622 53.3883   5
  -2  10   8 170.921 98.1957   5
   2  10  -8 314.693 156.321   5
  -2  10   7 525.457 144.861   5
   2  10  -7 548.885 168.856   5
  -2  10   6-4.19601 48.3827   5
   2  10  -6 85.1644 90.4739   5
   2  10  -5 57.2755 78.3685   5
  -2  10   5 106.568 69.6976   5
  -2  10   4 632.563 162.085   5
   2  10  -4 701.419 196.732   5
   2  10  -3 308.820 129.795   5
  -2  10   3 389.977 133.882   5
   2  10  -2 823.318 204.031   5
  -2  10   2 636.874 170.403   5
   2  10  -1 520.139 163.804   5
  -2  10   1 333.235 125.893   5
   2  10  -1 285.887 55.6139   2
   2  10   0 892.529 97.6147   2
  -2  10   0 967.446 206.700   5
   2  10   0 915.731 212.563   5
   2  10   1 293.015 62.0110   2
  -2  10  -1 331.230 125.171   5
   2  10   1 151.651 93.1394   5
   2  10   2 679.183 86.0162   2
   2  10   2 760.421 203.828   5
  -2  10  -2 778.160 184.533   5
  -2  10  -3 248.756 93.0780   5
   2  10   3 440.400 176.815   5
  -2  10  -4 948.254 207.049   5
   2  10   4 538.047 181.276   5
  -2  10  -5 37.6604 80.0693   5
   2  10   5 1.99556 59.4296   5
   2  10   6 149.202 97.0206   5
  -2  10  -6-15.2191 40.3699   5
  -2  10  -7 459.943 139.471   5
   2  10   7 515.548 169.291   5
  -2  10  -8 82.3329 61.2392   5
   2  10   8 12.7640 69.7967   5
   2  10   9 108.734 38.1365   2
  -2  10  -9 117.502 89.9862   5
   2  10   9 242.409 135.007   5
   2  10  10 280.643 59.9046   2
  -2  10 -10 425.142 148.589   5
   2  10  10 553.754 173.783   5
   2  10  11 383.676 70.3373   2
  -2  10 -11 358.788 155.737   5
   2  10  11 560.700 174.588   5
   2  10  12 103.510 43.0015   2
  -2  10 -12-21.3477 57.3580   5
   2  10  12 83.5227 78.2276   5
   2 -10 -12 11.3899 35.2798   4
   2  10  13 490.587 82.0846   2
  -2  10 -13 639.667 166.543   5
   2  10  13 582.772 198.136   5
   2 -10 -13 711.881 165.342   4
   2  10  14 492.356 84.3872   2
  -2  10 -14 360.603 136.648   5
   2  10  14 705.433 217.710   5
   2 -10 -14 497.149 133.505   4
   2  10  15 131.703 42.7954   2
  -2  10 -15 91.7876 99.5796   5
   2 -10 -15 177.082 87.2866   4
   2  10  15 32.1253 55.4482   5
   2  10  16 108.762 48.9776   2
  -2  10 -16 189.769 91.3607   5
   2  10  16-41.7591 89.3914   5
   2 -10 -16 57.6620 68.0812   4
   2  10  17 312.771 73.1354   2
  -2  10 -17 519.793 165.721   5
   2 -10 -17 292.526 114.380   4
   2  10  17 426.192 173.439   5
   2  10  18 422.393 80.3760   2
  -2  10 -18 353.608 145.748   5
   2 -10 -18 416.041 128.841   4
   2  10  19 154.226 57.0444   2
  -2  10 -19 113.118 110.280   5
   2 -10 -19 304.271 114.525   4
   2  10  20-21.2457 25.5537   2
  -2  10 -20 17.8671 62.0239   5
   2 -10 -20-101.556 83.7336   4
   2 -10 -21 401.176 174.149   1
   2  10  21 156.185 55.3048   2
  -2  10 -21 596.898 193.658   5
   2 -10 -21 357.791 134.785   4
   2 -10 -22 422.553 199.615   1
   2  10  22 528.558 98.8894   2
  -2  10 -22 518.048 187.455   5
   2 -10 -22 587.656 149.704   4
   2 -10 -23 49.4919 122.416   1
   2  10  23 255.049 72.8507   2
  -2  10 -23 319.620 170.071   5
   2 -10 -23 108.462 69.3570   4
   2 -10 -24 108.564 81.9581   1
   2  10  24 257.106 77.5618   2
  -2  10 -24 63.9404 96.9940   5
   2 -10 -24 171.372 128.863   4
   2 -10 -25 22.1593 73.6778   1
   2  10  25 46.3921 40.2876   2
   2 -10 -25 82.4699 86.7490   4
   2 -10 -26 120.965 104.319   1
   2  10  26 71.8468 50.1443   2
   2 -10 -26 73.1416 102.594   4
   2  10  27 104.470 55.7202   2
   2 -10 -27 205.658 106.701   4
   2  10  28-71.4503 47.9351   2
   2 -10 -28-29.9214 88.4609   4
   2  10  29 86.9438 70.1216   2
   2 -10 -29 28.4229 79.2043   4
   2  10  30 98.9769 61.6679   2
   2 -10 -30 269.234 145.692   4
   2  10  31 21.2167 40.6199   2
   2  11 -24 66.1919 98.8855   5
   2  11 -23 79.5152 119.371   5
  -2  11  23 85.8331 93.7605   5
   2  11 -22 618.525 214.230   5
  -2  11  22 560.908 180.844   5
   2  11 -21-87.6256 125.209   5
  -2  11  21 84.1787 63.9282   5
   2  11 -20 150.548 80.5861   5
  -2  11  20 26.5643 100.843   5
   2  11 -19-55.1795 82.8475   5
  -2  11  19-14.6498 57.5079   5
   2  11 -18 234.550 135.214   5
  -2  11  18 79.5828 83.7516   5
   2  11 -17 15.6849 69.5930   5
  -2  11  17 77.2296 70.0656   5
  -2  11  16 193.534 114.153   5
   2  11 -16 43.2780 87.7836   5
   2  11 -15 542.210 201.549   5
  -2  11  15 320.707 147.563   5
   2  11 -14 311.703 169.252   5
  -2  11  14 321.346 140.760   5
  -2  11  13 349.974 140.989   5
   2  11 -13 364.813 162.793   5
   2  11 -12 246.866 148.431   5
  -2  11  12 384.437 150.203   5
   2  11 -11 69.7443 88.2697   5
  -2  11  11 85.5572 53.8096   5
  -2  11  10-8.69086 52.6971   5
   2  11 -10 7.23101 67.8891   5
   2  11  -9 57.7302 59.2732   5
  -2  11   9 73.1233 56.5788   5
   2  11  -8 55.7689 84.3554   5
  -2  11   8-95.3592 81.7115   5
  -2  11   7-119.031 91.8095   5
   2  11  -7-93.8497 89.7065   5
  -2  11   6 271.826 124.866   5
   2  11  -6 324.035 120.067   5
  -2  11   5 97.4894 90.8664   5
   2  11  -5 44.3391 92.0083   5
  -2  11   4 226.240 107.609   5
   2  11  -4 53.5618 65.0459   5
   2  11  -3 41.5467 61.9391   5
  -2  11   3 52.9774 75.0882   5
   2  11  -2 70.0383 101.563   5
  -2  11   2-51.4304 61.3532   5
   2  11  -1 383.353 154.243   5
  -2  11   1 156.275 106.153   5
  -2  11   0 407.638 141.956   5
   2  11   0 323.585 150.526   5
   2  11   1 96.4760 89.4800   5
  -2  11  -1 169.605 99.6866   5
   2  11   2 134.406 123.694   5
  -2  11  -2 4.87820 72.0097   5
  -2  11  -3 181.157 90.4995   5
   2  11   3 8.90462 62.4217   5
   2  11   4 276.526 140.545   5
  -2  11  -4 190.707 114.667   5
   2  11   5 200.877 115.696   5
  -2  11  -5 24.5081 119.536   5
  -2  11  -6 294.721 117.097   5
   2  11   6 234.904 126.707   5
  -2  11  -7 220.955 124.257   5
   2  11   7 63.7701 87.2852   5
  -2  11  -8 19.7222 57.1322   5
   2  11   8 116.041 104.568   5
  -2  11  -9-100.815 58.5243   5
   2  11   9 217.266 124.552   5
  -2  11 -10-81.2390 93.9613   5
   2  11  10-64.5119 88.2374   5
  -2  11 -11 175.351 123.350   5
   2  11  11 156.527 120.281   5
  -2  11 -12 271.221 122.484   5
   2  11  12 472.989 181.157   5
  -2  11 -13 435.629 161.351   5
   2  11  13 310.891 150.607   5
  -2  11 -14 214.220 117.618   5
   2  11  14 152.005 94.1439   5
   2 -11 -14 140.405 81.8672   4
  -2  11 -15 672.936 199.721   5
   2 -11 -15 280.412 114.599   4
   2  11  15 573.486 210.514   5
  -2  11 -16 12.6516 71.7539   5
   2 -11 -16 148.555 79.8862   4
   2  11  16 99.3315 122.329   5
  -2  11 -17-11.6860 68.7413   5
   2 -11 -17 98.0514 75.1562   4
   2  11  17 68.9265 126.910   5
  -2  11 -18 354.783 163.736   5
   2 -11 -18 134.060 88.3530   4
  -2  11 -19 1.20589 72.0336   5
   2 -11 -19 79.9424 79.1589   4
   2 -11 -20 122.383 84.8745   4
   2 -11 -21 5.09911 59.0052   4
   2 -11 -22 328.250 208.660   1
   2 -11 -22 682.554 191.833   4
   2 -11 -23 32.8883 69.9583   4
   2 -11 -24 85.7303 78.3298   4
   2 -11 -25-30.8600 69.6344   4
   2 -11 -26 6.35598 68.2753   4
   2 -11 -27 220.620 167.825   4
  -2  12  22-4.67466 85.8423   5
  -2  12  21-107.824 99.5820   5
  -2  12  20 179.248 130.127   5
  -2  12  19 0.56868 66.4059   5
  -2  12  18 6.20478 54.5980   5
  -2  12  17 46.5611 116.007   5
  -2  12  16-74.3661 82.6293   5
  -2  12  15 66.3632 61.6970   5
  -2  12  14 37.3242 62.3086   5
   2  12 -14 10.8112 68.9266   5
   2  12 -13 231.274 169.660   5
  -2  12  13 269.249 138.566   5
  -2  12  12 152.034 95.3365   5
   2  12 -12 102.457 113.183   5
   2  12 -11 30.2740 80.5501   5
  -2  12  11 152.677 110.208   5
  -2  12  10 1.64077 92.9038   5
   2  12 -10-29.4687 62.6082   5
  -2  12   9 14.7080 84.1952   5
   2  12  -9-32.3607 65.9919   5
   2  12  -8 258.251 155.055   5
  -2  12   8 432.441 167.702   5
  -2  12   7 737.178 211.495   5
   2  12  -7 447.280 201.630   5
   2  12  -6 646.592 204.876   5
  -2  12   6 551.519 185.476   5
   2  12  -5 546.918 200.976   5
  -2  12   5 315.152 149.512   5
   2  12  -4 617.498 210.639   5
  -2  12   4 176.433 126.130   5
  -2  12   3 117.525 112.148   5
   2  12  -3 50.7523 105.301   5
  -2  12   2 605.966 197.729   5
   2  12  -2 561.325 197.766   5
   2  12  -1 295.393 143.620   5
  -2  12   1 304.911 136.455   5
   2  12   0-142.172 122.830   5
  -2  12   0-78.6628 101.123   5
   2  12   1 472.671 197.616   5
  -2  12  -1 84.4571 89.6770   5
   2  12   2 871.345 250.084   5
  -2  12  -2 476.825 179.943   5
   2  12   3 48.8380 114.781   5
  -2  12  -3-11.1052 67.2232   5
  -2  12  -4 272.411 144.986   5
   2  12   4 414.291 190.820   5
  -2  12  -5 442.215 181.782   5
   2  12   5 622.318 210.035   5
  -2  12  -6 604.264 200.013   5
   2  12   6 581.907 214.852   5
  -2  12  -7 299.230 145.884   5
   2  12   7 394.090 173.933   5
  -2  12  -8 173.635 102.412   5
   2  12   8 324.426 177.152   5
  -2  12  -9 232.428 143.638   5
   2  12   9 48.6317 118.086   5
  -2  12 -10-29.8600 83.3006   5
  -2  12 -11 373.049 155.877   5
  -2  13  12 121.080 143.914   5
  -2  13  11 1.24019 104.814   5
  -2  13  10 5.55035 106.470   5
  -2  13   9 53.3866 76.7278   5
  -2  13   8 29.3310 68.1570   5
  -2  13   7 139.016 135.558   5
  -2  13   6 99.9789 104.358   5
  -2  13   5 94.3688 115.869   5
  -2  13   4 116.776 119.292   5
   3   0   0 8.24606 31.0096   3
   3   0  -1 161.965 52.1332   3
   3   0   1 329.848 95.3402   3
  -3   0   2 743.959 89.6422   5
   3   0   2 826.817 140.369   3
   3   0  -2 792.940 137.879   3
  -3   0   3 888.179 93.8234   5
   3   0   3 859.710 149.666   3
   3   0  -3 759.306 143.430   3
  -3   0   4 8895.26 271.263   5
   3   0  -4 8606.02 457.261   3
   3   0   4 9153.98 467.893   3
  -3   0   5 3207.85 149.914   5
   3   0  -5 3041.86 272.192   3
  -3   0  -5 3280.90 276.750   3
   3   0   5 3224.86 278.749   3
  -3   0  -6 99.1259 43.0030   3
  -3   0   6 139.371 32.9982   1
  -3   0   6 164.551 32.0766   5
  -3   0   6 117.026 62.6060   4
   3   0   6 226.567 78.4727   3
   3   0  -6 184.922 64.5878   3
  -3   0   7 2197.38 139.469   1
  -3   0   7 2362.95 100.933   5
   3   0  -7 2229.08 235.790   3
  -3   0   7 2559.48 242.828   4
  -3   0  -7 2247.69 221.505   3
   3   0   7 2435.50 240.405   3
  -3   0   8 1642.08 130.814   1
  -3   0   8 1700.27 199.204   4
   3   0  -8 1773.59 211.408   3
   3   0   8 1784.33 202.609   3
  -3   0  -8 1698.55 191.387   3
  -3   0   9 87.4135 42.0457   1
  -3   0  -9 47.7536 55.2419   3
   3   0  -9 89.0884 52.6513   3
   3   0   9 105.919 59.9664   3
  -3   0   9 77.2077 40.9042   4
  -3   0  10 20.6627 27.7765   1
  -3   0 -10 39.5211 43.8968   3
   3   0  10 63.9029 64.9392   3
  -3   0  10 55.9941 48.1903   4
   3   0 -10 75.2315 55.6542   3
  -3   0  11 3318.48 219.111   1
  -3   0 -11 3363.39 263.574   3
   3   0 -11 3332.56 285.355   3
  -3   0  11 3404.14 277.521   4
   3   0  11 3396.88 280.657   3
  -3   0  12 1497.11 161.292   1
  -3   0 -12 2209.64 217.295   3
  -3   0  12 1588.81 190.814   4
   3   0  12 1590.88 196.595   3
  -3   0  12 2160.80 246.932   3
  -3   0  13 1388.09 157.761   1
  -3   0 -13 1502.89 176.472   3
  -3   0  13 1667.02 194.065   4
   3   0  13 1544.63 190.961   3
  -3   0  13 1772.67 219.977   3
   3   0  14 968.507 134.910   1
  -3   0  14 1039.79 143.757   1
   3   0  14 995.544 154.321   3
  -3   0  14 823.506 150.897   3
  -3   0 -14 913.533 137.990   3
  -3   0  14 1198.93 162.316   4
   3   0  15 1611.33 185.872   1
  -3   0  15 1505.85 177.839   1
  -3   0 -15 1638.57 179.657   3
  -3   0  15 1537.12 186.168   4
   3   0  15 1661.74 199.661   3
  -3   0  15 1683.87 213.417   3
  -3   0  16 711.377 130.091   1
   3   0  16 729.502 128.376   1
   3   0  16 617.352 104.895   2
  -3   0 -16 967.197 136.138   3
   3   0  16 942.364 148.846   3
  -3   0  16 963.465 162.170   3
  -3   0  16 836.121 139.483   4
  -3   0  17-33.3107 46.7393   1
   3   0  17-32.6905 41.3174   1
   3   0  17-54.4779 55.8789   2
   3   0  17 12.5558 36.4921   3
  -3   0  17 27.6860 48.3001   3
  -3   0 -17 15.4453 28.7043   3
  -3   0  17-4.98192 26.1881   4
  -3   0  18 27.0464 32.8991   1
   3   0  18 14.1880 57.0958   1
   3   0  18 57.5447 44.0172   2
  -3   0 -18 38.8161 34.9697   3
  -3   0  18 90.5170 68.2604   3
   3   0  18 83.2822 65.8367   3
   3   0 -18 117.719 132.231   4
  -3   0  18 101.377 52.6937   4
   3   0  19 4266.91 345.805   1
  -3   0  19 4151.60 334.334   1
  -3   0 -19 4834.19 289.943   3
   3   0  19 3925.92 270.709   2
   3   0 -19 4837.51 400.336   4
   3   0  19 4549.54 327.130   3
  -3   0  19 4641.10 356.943   3
  -3   0  20 203.303 70.6914   1
   3   0  20 97.2548 67.7960   1
   3   0  20 104.063 48.7946   2
  -3   0  20 229.954 101.252   3
  -3   0 -20 117.995 50.6600   3
   3   0 -20 57.8083 116.801   4
   3   0  20 60.7745 61.2254   3
   3   0  21 3833.05 345.781   1
  -3   0  21 3793.56 341.118   1
  -3   0 -21 4013.20 252.489   3
   3   0  21 3908.54 272.900   2
   3   0 -21 3675.17 358.722   4
   3   0  21 4083.97 308.228   3
  -3   0  21 4154.12 338.184   3
   3   0  22 68.6531 63.3031   1
   3   0  22 252.313 84.9286   2
  -3   0  22 243.047 87.8649   1
  -3   0  22 222.699 90.7301   3
  -3   0 -22 262.335 65.5153   3
   3   0  22 234.242 83.3368   3
   3   0 -22 229.461 123.953   4
   3   0  23 65.1212 60.4771   1
   3   0  23-24.8402 47.8052   2
  -3   0  23-1.68997 39.8642   1
  -3   0  23 43.5202 55.7861   3
  -3   0 -23 41.2482 35.1367   3
   3   0  23 7.57492 34.8806   3
   3   0 -23-68.1541 66.5545   4
   3   0  24 1506.70 235.560   1
  -3   0  24 1163.41 201.316   1
   3   0  24 1448.18 171.132   2
  -3   0 -24 1722.49 156.033   3
   3   0 -24 1657.59 258.461   4
   3   0  24 1511.33 187.089   3
  -3   0  24 1499.57 206.769   3
  -3   0 -25 151.183 48.2794   3
  -3   0  25 92.5953 61.1303   3
   3   0  25 274.561 118.097   1
   3   0  25 267.379 86.5579   2
  -3   0  25 110.916 68.1359   1
   3   0 -25 168.449 29.3149   5
   3   0 -25 134.390 25.5385   5
   3   0 -25 176.898 96.8305   4
   3   0  25 236.095 79.3949   3
  -3   0 -26 1358.89 130.897   3
  -3   0  26 1331.79 196.731   3
   3   0  26 1082.10 148.520   2
   3   0 -26 1460.77 90.0780   5
   3   0 -26 1288.06 85.4107   5
   3   0  26 1303.88 173.586   3
   3   0 -26 1418.34 242.790   4
  -3   0  27 1014.45 173.093   3
   3   0  27 871.611 139.983   2
   3   0 -27 1009.17 85.0563   5
   3   0 -27 1012.33 83.4626   5
   3   0 -27 1000.81 209.916   4
   3   0  27 1082.44 157.801   3
  -3   0  28-24.2675 51.3372   3
   3   0  28 46.7999 42.3354   2
   3   0 -28 35.9838 23.4528   5
   3   0 -28-11.9200 54.1878   4
   3   0  28 37.6224 49.2560   3
  -3   0  29 838.626 157.432   3
   3   0  29 862.598 139.874   2
   3   0 -29 682.777 81.9076   5
   3   0 -29 712.621 172.782   4
   3   0  29 875.713 142.066   3
   3   0  30 64.1183 47.2141   2
  -3   0  30 75.0045 73.7937   3
   3   0 -30 35.0887 77.6174   4
   3   0  31 769.640 132.209   2
  -3   0  31 777.867 150.922   3
   3   0 -31 1014.35 220.449   4
   3   0  32 453.898 106.270   2
  -3   0  32 512.851 127.757   3
   3   0 -32 416.421 151.417   4
   3   0  33 421.263 99.4642   2
  -3   0  33 383.037 107.548   3
   3   0 -33 492.813 160.891   4
   3   0  34 61.7445 52.0764   2
  -3   0  34 28.7714 33.4187   3
   3   0  35 217.674 79.7337   2
  -3   0  35 219.655 87.7166   3
   3   0 -35 157.698 117.540   4
   3   0  36 451.672 107.226   2
   3   0 -36 490.917 177.040   4
   3   0  37 114.844 59.2563   2
   3   0 -37-136.573 105.124   4
   3   0  38 271.363 90.4006   2
   3   0 -38 8.24967 79.5613   4
   3   0  39 541.929 138.088   2
   3   0 -39 506.224 202.078   4
   3   0 -40 277.681 161.092   4
   3   1 -40 529.561 202.214   4
   3  -1  39 61.9728 65.6976   2
   3   1 -39 127.162 69.7362   4
   3  -1  38 374.701 105.833   2
   3   1 -38 404.461 168.832   4
   3  -1  37 141.297 72.2075   2
   3   1 -37 119.755 108.410   4
   3  -1  36-3.62538 29.4403   2
   3   1 -36-78.3138 77.6672   4
   3  -1  35 1565.63 202.927   2
   3   1 -35 1348.08 254.390   4
   3  -1  34 94.7984 60.8226   2
  -3   1  34 224.279 76.2965   3
   3   1 -34 152.336 103.721   4
   3  -1  33-2.13819 32.1281   2
  -3   1  33 59.4104 57.8049   3
   3   1 -33 61.2207 65.7913   4
   3  -1  32 274.175 86.0040   2
  -3   1  32 201.826 74.3978   3
   3   1 -32 81.9772 57.0893   4
   3  -1  31 379.597 100.341   2
  -3   1  31 305.580 94.5089   3
   3   1 -31 412.793 140.807   4
   3  -1  30 1906.68 206.727   2
   3   1 -30 1784.31 156.304   5
  -3   1  30 1814.49 212.781   3
   3   1 -30 1970.67 298.720   4
   3  -1  30 1923.37 227.807   3
   3  -1  29 205.185 76.1590   3
  -3   1  29-16.0123 46.4294   3
   3  -1  29 111.938 62.6894   2
   3   1 -29 48.8556 30.7169   5
   3   1 -29 214.468 111.435   4
   3  -1  28 955.672 161.968   3
  -3  -1 -28 1218.04 115.552   3
  -3   1  28 1046.08 163.612   3
   3  -1  28 1161.35 152.263   2
   3   1 -28 1096.01 114.948   5
   3   1 -28 966.487 204.653   4
  -3   1  27-4.77852 48.3814   3
  -3  -1 -27 77.7885 39.0765   3
   3  -1  27 86.6079 49.4197   3
   3  -1  27 133.247 66.1872   2
   3   1 -27 110.637 38.7640   5
   3   1 -27 45.4349 49.6294   4
   3  -1  26 215.652 83.9762   3
  -3   1  26 56.0362 33.4151   3
  -3  -1 -26 191.336 48.1064   3
   3  -1  26 260.675 75.6418   2
   3   1 -26 222.478 49.2294   5
   3   1 -26 131.134 65.7259   4
  -3   1  25 1416.06 190.057   3
   3  -1  25 1560.67 176.284   2
  -3  -1 -25 1242.33 127.616   3
  -3   1  25 1078.15 216.718   1
   3  -1  25 1001.21 200.089   1
   3   1 -25 1127.84 102.435   5
   3   1 -25 1218.72 208.214   4
   3  -1  25 1329.81 188.846   3
   3  -1  24 1736.82 188.228   2
  -3  -1 -24 1655.60 153.818   3
  -3   1  24 1543.14 239.695   1
   3  -1  24 1600.31 240.933   1
   3   1 -24 1951.05 126.223   5
  -3   1  24 1597.39 205.664   3
   3   1 -24 1603.70 248.150   4
   3  -1  24 1748.74 213.865   3
  -3  -1 -23 562.088 97.9703   3
  -3   1  23 711.507 141.765   3
   3  -1  23 996.961 165.878   3
  -3   1  23 449.804 128.496   1
   3  -1  23 718.796 120.864   2
   3  -1  23 721.146 152.404   1
   3   1 -23 835.875 79.4258   5
   3   1 -23 789.533 183.678   4
   3  -1  22 1788.39 186.030   2
  -3  -1 -22 1757.63 165.282   3
  -3   1  22 1891.25 250.430   1
   3  -1  22 2080.30 255.357   1
   3   1 -22 2088.85 117.285   5
  -3   1  22 1650.94 207.631   3
   3   1 -22 2186.35 277.335   4
   3  -1  22 2154.46 236.301   3
   3  -1  21 595.345 130.935   3
  -3   1  21 628.784 130.112   3
  -3  -1 -21 645.811 103.617   3
   3  -1  21 417.943 119.835   1
  -3   1  21 500.765 124.416   1
   3  -1  21 532.530 106.185   2
   3   1 -21 537.429 56.4920   5
   3   1 -21 594.398 148.447   4
  -3  -1 -20 2425.01 205.322   3
   3  -1  20 2247.19 206.328   2
  -3   1  20 2290.17 263.822   1
   3  -1  20 2286.12 257.566   1
   3   1 -20 2614.72 116.756   5
   3  -1  20 2331.80 243.243   3
   3   1 -20 2611.28 293.604   4
  -3   1  20 2458.96 255.186   3
  -3  -1 -19 24.7967 32.4405   3
   3  -1  19 34.9978 36.8517   3
  -3   1  19-71.0614 55.0690   3
   3   1 -19 16.7037 13.8680   5
  -3   1  19 0.57163 36.6781   1
   3  -1  19 55.3385 47.9052   1
   3  -1  19 91.2660 54.8487   2
  -3   1  18 901.649 154.127   3
   3  -1  18 959.363 161.392   3
  -3  -1 -18 926.567 132.357   3
  -3   1  18 814.224 149.606   1
   3  -1  18 707.700 135.491   1
   3  -1  18 711.305 117.149   2
   3   1 -18 864.128 60.1406   5
  -3   1  17 599.060 126.155   3
   3  -1  17 318.238 97.4352   3
  -3  -1 -17 435.537 96.8682   3
  -3   1  17 609.668 123.490   1
   3  -1  17 504.283 112.469   1
   3  -1  17 327.168 84.4585   2
   3   1 -17 419.718 40.6661   5
  -3   1  17 579.433 116.411   4
  -3  -1 -16 3266.51 253.111   3
   3  -1  16 3122.60 239.018   2
  -3   1  16 3016.78 266.960   1
   3  -1  16 3246.53 268.789   1
   3   1 -16 3208.14 105.395   5
  -3   1  16 3266.64 268.151   4
   3  -1  16 3168.11 284.157   3
  -3   1  16 3061.45 281.433   3
  -3  -1 -15 1502.12 173.559   3
   3  -1  15 1190.54 144.627   2
   3  -1  15 1418.04 175.481   1
   3   1 -15 1468.79 70.8070   5
   3  -1  15 1641.83 205.656   3
  -3   1  15 1436.19 179.503   4
  -3   1  15 1596.28 204.465   3
   3  -1  14 635.669 114.404   1
  -3   1  14 790.312 146.811   3
   3  -1  14 575.356 118.476   3
  -3  -1 -14 479.113 103.380   3
  -3   1  14 640.178 118.915   4
   3  -1  13 3825.21 259.200   1
  -3  -1 -13 3571.20 273.004   3
   3  -1  13 3687.41 304.844   3
  -3   1  13 3934.56 293.154   4
  -3   1  13 3784.97 306.131   3
   3  -1  12 522.116 97.1638   1
   3  -1  12 578.252 123.809   3
  -3  -1 -12 411.290 88.7719   3
  -3   1  12 551.209 112.642   4
   3  -1  11 572.900 94.1510   1
   3  -1  11 651.372 128.269   3
  -3  -1 -11 493.101 106.514   3
  -3   1  11 531.128 110.457   4
   3  -1  10 5128.72 260.592   1
   3  -1  10 5644.06 374.705   3
  -3  -1 -10 4984.05 334.462   3
  -3   1  10 5250.66 342.358   4
   3  -1   9 3986.15 213.409   1
  -3   1   9 3799.03 288.614   4
  -3  -1  -9 3816.80 290.892   3
   3  -1   9 4073.52 318.801   3
   3  -1   8 7430.99 270.139   1
  -3   1   8 7790.12 419.010   4
  -3  -1  -8 7261.75 406.890   3
   3  -1   8 7741.05 438.477   3
   3  -1   7 1667.00 120.268   1
  -3   1   7 1531.00 67.8974   5
  -3   1   7 1648.54 73.0013   5
  -3  -1  -7 1694.31 202.568   3
  -3   1   7 1709.16 198.930   4
   3  -1   7 1923.99 220.594   3
   3  -1   6 1603.49 104.082   1
  -3  -1  -6 1476.00 115.971   1
  -3  -1  -6 1149.10 167.350   3
  -3   1   6 1433.27 174.042   4
   3  -1   6 1429.11 192.880   3
   3  -1   5 6715.94 186.280   1
  -3  -1  -5 6782.12 225.696   1
  -3  -1  -5 6940.81 404.061   3
  -3   1   5 6571.27 388.868   4
   3  -1   5 6401.75 394.214   3
   3  -1   4 1090.08 167.048   3
  -3  -1  -4 1093.15 166.771   3
  -3  -1  -4 1058.57 83.0933   1
  -3  -1  -4 1006.88 137.089   5
  -3   1   4 999.289 151.481   4
  -3  -1  -3 8320.94 216.239   1
  -3  -1  -3 8558.06 383.893   5
   3   1  -3 8525.77 446.582   3
   3  -1   3 8116.04 449.420   3
  -3  -1  -2 404.209 43.1475   1
   3  -1   2 368.037 103.667   3
  -3  -1  -2 414.564 83.2684   5
   3   1  -2 436.250 108.221   3
  -3  -1  -1 3746.00 234.842   5
   3   1  -1 3720.35 294.267   3
   3  -1   1 3828.06 305.373   3
  -3  -1   0 3382.30 216.033   5
   3   1   0 3703.74 295.662   3
   3  -1   0 3412.72 287.836   3
  -3  -1   1 3366.80 208.048   5
   3   1   1 3857.03 295.708   3
   3  -1  -1 3515.78 294.653   3
   3  -1  -2 378.768 97.7989   3
  -3  -1   2 451.557 74.9344   5
   3   1   2 418.157 105.426   3
  -3  -1   3 8187.97 297.227   5
   3   1   3 8181.18 435.112   3
   3  -1  -3 8215.02 453.197   3
  -3  -1   4 957.860 98.7047   5
   3   1   4 1030.62 159.274   3
   3  -1  -4 821.528 145.540   3
  -3  -1   5 6056.84 235.447   5
   3   1   5 6067.13 374.533   3
   3  -1  -5 6677.83 410.250   3
  -3   1  -6 1541.52 184.649   3
  -3  -1   6 1451.26 110.275   5
   3   1   6 1329.55 177.969   3
  -3  -1   6 1490.04 186.931   4
   3  -1  -6 1535.91 202.585   3
  -3   1  -7 1574.95 186.090   3
  -3  -1   7 1730.92 115.590   5
   3   1   7 1425.20 183.993   3
  -3  -1   7 1880.16 208.623   4
   3  -1  -7 1678.42 206.896   3
  -3   1  -8 7735.83 401.466   3
  -3  -1   8 7458.29 223.340   5
  -3  -1   8 7754.60 424.178   4
   3   1   8 7815.72 418.906   3
   3  -1  -8 7305.30 429.664   3
  -3   1  -9 3895.98 285.295   3
  -3  -1   9 3691.25 148.633   5
  -3  -1   9 3916.26 302.869   4
   3   1   9 3521.66 281.728   3
   3  -1  -9 3817.72 308.572   3
  -3  -1   9 4068.04 328.212   3
  -3   1 -10 5145.45 324.150   3
  -3  -1  10 4838.73 159.313   5
  -3  -1  10 5133.93 340.941   4
   3   1  10 4725.74 327.424   3
   3  -1 -10 4890.28 352.311   3
  -3  -1  10 5026.02 370.582   3
  -3   1 -11 670.691 118.910   3
  -3  -1  11 715.631 144.058   3
   3   1  11 635.785 122.083   3
   3  -1 -11 572.394 117.855   3
  -3  -1  11 542.119 109.910   4
  -3   1 -12 487.808 107.527   3
   3  -1 -12 348.607 93.2463   3
   3   1  12 421.694 97.7830   3
  -3  -1  12 515.076 120.460   4
  -3  -1  12 562.413 140.930   3
  -3   1 -13 3584.31 263.770   3
  -3  -1  13 3582.97 284.222   4
   3  -1 -13 3721.30 306.060   3
   3   1  13 3430.81 274.989   3
  -3  -1  13 3625.29 314.635   3
  -3   1 -14 623.236 110.777   3
   3  -1 -14 767.635 141.548   3
  -3  -1  14 578.613 129.843   3
   3   1  14 738.639 127.923   3
  -3  -1  14 763.607 130.845   4
  -3   1 -15 1489.31 166.481   3
  -3  -1  15 1485.24 180.025   4
   3  -1 -15 1360.27 190.667   3
   3   1  15 1366.52 173.857   3
  -3  -1  15 1498.43 209.429   3
  -3  -1  16 3049.06 258.837   1
   3   1  16 3235.63 258.328   2
  -3   1 -16 3322.65 244.874   3
  -3  -1  16 3376.87 268.290   4
   3   1  16 3113.92 261.000   3
   3  -1 -16 3360.95 292.402   3
   3  -1 -16 2894.09 306.847   4
  -3  -1  16 3014.19 290.996   3
   3   1  17 388.560 80.9546   2
  -3  -1  17 447.660 109.972   1
  -3   1 -17 365.079 83.4053   3
   3  -1 -17 514.038 140.403   4
  -3  -1  17 453.365 101.439   4
   3   1  17 512.688 106.176   3
  -3  -1  17 319.478 96.7939   3
   3   1  18 740.857 118.923   2
   3  -1 -18 859.973 131.154   2
  -3  -1  18 844.746 146.274   1
  -3   1 -18 684.088 106.776   3
  -3  -1  18 1005.04 176.124   3
   3  -1 -18 869.142 174.917   4
  -3  -1  18 791.719 130.728   4
   3   1  18 805.907 134.569   3
  -3  -1  19-29.6598 36.6935   1
   3   1  19 128.834 60.5060   2
  -3   1 -19-7.91759 26.5046   3
   3  -1 -19 89.8537 112.462   4
  -3  -1  19 60.3092 45.4649   4
   3   1  19 49.4449 47.7989   3
  -3  -1  19 74.3582 50.8291   3
  -3  -1  20 2334.98 259.522   1
   3   1  20 1967.38 193.007   2
  -3   1 -20 2346.23 195.380   3
   3   1  20 2380.25 224.752   3
   3  -1 -20 2643.37 304.816   4
  -3  -1  20 2269.98 255.611   3
   3   1  21 600.254 119.896   2
  -3  -1  21 295.315 103.581   1
  -3  -1  21 477.947 130.512   3
  -3   1 -21 511.355 90.8334   3
   3  -1 -21 645.588 153.409   4
   3   1  21 565.122 108.722   3
  -3  -1  22 1895.83 241.468   1
  -3   1 -22 1890.18 170.386   3
   3   1  22 1715.62 186.474   2
   3   1  22 1551.29 179.937   3
   3  -1 -22 2216.37 279.590   4
  -3  -1  22 1756.69 229.218   3
  -3  -1  23 710.956 152.021   1
   3   1  23 560.164 114.501   2
  -3  -1  23 736.209 156.283   3
  -3   1 -23 762.830 106.469   3
   3  -1 -23 608.875 174.728   4
   3   1  23 491.470 101.602   3
  -3  -1  24 1885.48 259.954   1
  -3  -1  24 1448.43 215.880   3
  -3   1 -24 1562.64 149.870   3
   3   1  24 1513.53 175.304   2
   3  -1 -24 1628.87 249.567   4
   3   1  24 1615.94 179.541   3
  -3  -1  25 1284.20 199.657   3
   3   1  25 1094.41 151.778   2
   3  -1 -25 1656.61 250.299   4
   3   1  25 1241.36 156.513   3
   3   1  26 71.0088 46.2988   2
  -3  -1  26 90.1762 70.9962   3
   3  -1 -26 152.455 99.3592   4
   3   1  26 178.200 64.6117   3
  -3  -1  27 69.1971 35.6335   3
   3   1  27 134.465 69.7663   2
   3  -1 -27 109.711 22.1603   5
   3  -1 -27 119.764 22.3201   5
   3  -1 -27 91.4379 92.3904   4
   3   1  27 170.765 64.5844   3
  -3  -1  28 1054.46 184.159   3
   3   1  28 1017.05 151.119   2
   3  -1 -28 1196.59 81.2380   5
   3  -1 -28 935.348 199.843   4
  -3  -1  29-46.9287 43.6010   3
   3   1  29 47.2665 48.7919   2
   3  -1 -29 50.3043 24.2472   5
   3  -1 -29 92.8173 90.0426   4
  -3  -1  30 1496.21 211.808   3
   3   1  30 1695.55 199.078   2
   3  -1 -30 1856.27 296.512   4
   3   1  31 367.057 98.6605   2
  -3  -1  31 290.674 109.733   3
   3  -1 -31 303.486 143.987   4
   3   1  32 340.609 90.9359   2
  -3  -1  32 162.382 74.8496   3
   3  -1 -32 231.135 108.621   4
   3   1  33 15.0156 41.7727   2
  -3  -1  33 22.9580 48.2421   3
   3  -1 -33-58.5255 71.8772   4
   3   1  34 66.4325 60.9691   2
  -3  -1  34 94.5387 66.4867   3
   3  -1 -34 248.627 117.567   4
   3   1  35 1465.44 197.865   2
  -3  -1  35 1138.81 189.799   3
   3  -1 -35 1319.33 279.701   4
   3   1  36 204.062 83.7021   2
  -3  -1  36 171.881 83.8040   3
   3  -1 -36 46.1309 62.3730   4
   3   1  37 87.5355 49.9161   2
   3  -1 -37-42.9352 72.4438   4
   3   1  38 278.016 95.1453   2
   3  -1 -38 360.630 164.522   4
   3  -1 -39 48.3294 96.7710   4
   3   2 -41-13.6687 68.4353   4
   3   2 -40 123.588 110.664   4
   3  -2  39 102.280 51.4369   2
   3   2 -39-117.457 95.7420   4
   3  -2  38 272.831 87.9806   2
   3   2 -38 35.2799 77.3637   4
   3  -2  37 624.245 129.909   2
   3   2 -37 280.360 148.101   4
   3  -2  36 214.680 83.9640   2
   3   2 -36 184.319 99.2991   4
   3  -2  35 662.421 133.459   2
   3   2 -35 794.557 207.772   4
   3  -2  34 250.210 76.1996   2
   3   2 -34 423.884 148.859   4
   3  -2  33 336.611 85.9667   2
  -3   2  33 195.079 68.9555   3
   3   2 -33 162.258 104.859   4
   3  -2  32 394.417 101.266   2
  -3   2  32 324.140 86.0448   3
   3   2 -32 253.676 126.811   4
  -3   2  31 450.996 99.3320   3
   3  -2  31 607.554 119.231   2
   3   2 -31 542.090 104.390   5
   3   2 -31 672.077 175.927   4
   3  -2  30 128.530 68.3361   3
  -3   2  30 176.723 64.0136   3
   3  -2  30 174.658 76.1237   2
   3   2 -30 256.077 77.8866   5
   3   2 -30 400.162 143.043   4
   3  -2  29 386.755 112.265   3
  -3  -2 -29 285.214 50.1102   3
  -3   2  29 355.819 87.4469   3
   3  -2  29 388.788 94.2519   2
   3   2 -29 501.351 90.9840   5
   3   2 -29 499.676 147.531   4
   3  -2  28 341.654 106.063   3
  -3   2  28 570.385 112.716   3
  -3  -2 -28 524.625 72.3930   3
   3  -2  28 482.313 101.566   2
   3   2 -28 556.173 96.6920   5
   3   2 -28 650.622 162.437   4
   3  -2  27 647.181 134.792   3
  -3  -2 -27 735.792 91.5145   3
  -3   2  27 873.943 141.758   3
   3  -2  27 643.432 114.609   2
   3   2 -27 846.754 115.661   5
   3   2 -27 743.865 185.441   4
   3  -2  26 1277.51 195.353   3
   3  -2  26 1189.19 153.122   2
  -3  -2 -26 1214.17 121.965   3
  -3   2  26 1200.60 168.691   3
   3   2 -26 1317.33 136.786   5
   3   2 -26 1455.94 242.501   4
   3  -2  25 248.579 98.4204   3
  -3  -2 -25 141.717 38.9331   3
  -3   2  25 301.348 91.1834   3
   3  -2  25 318.981 84.0034   2
   3   2 -25 316.447 69.9275   5
   3   2 -25 346.867 121.991   4
   3  -2  24 3307.55 251.496   2
  -3  -2 -24 3188.60 216.756   3
  -3   2  24 3333.29 280.447   3
   3  -2  24 3506.66 356.409   1
   3   2 -24 3542.92 215.070   5
   3   2 -24 3126.27 342.932   4
   3  -2  24 3531.10 322.994   3
   3  -2  23 1088.04 179.720   3
   3  -2  23 1048.74 148.953   2
  -3  -2 -23 962.369 123.223   3
  -3   2  23 873.392 146.596   3
   3  -2  23 1166.57 206.278   1
   3   2 -23 1087.75 119.037   5
  -3   2  22 1349.77 179.920   3
  -3  -2 -22 1620.07 165.988   3
   3  -2  22 1360.49 162.938   2
   3  -2  22 1707.85 243.374   1
   3   2 -22 1652.31 138.071   5
   3  -2  22 1848.78 237.514   3
   3  -2  21 533.848 126.247   3
  -3   2  21 397.831 103.537   3
  -3  -2 -21 568.948 103.317   3
   3  -2  21 588.558 104.247   2
   3  -2  21 555.411 120.899   1
   3   2 -21 565.091 83.3900   5
  -3   2  20 1261.59 178.864   3
  -3  -2 -20 1283.31 153.356   3
   3  -2  20 1457.67 159.432   2
   3  -2  20 1694.45 223.602   1
   3   2 -20 1562.64 129.395   5
   3  -2  20 1467.64 208.639   3
  -3  -2 -19 4396.83 289.470   3
  -3   2  19 4158.04 315.293   3
   3  -2  19 4137.53 269.060   2
   3  -2  19 4097.83 344.172   1
   3   2 -19 4100.98 206.221   5
   3  -2  19 3908.86 332.632   3
  -3   2  18 1615.12 199.345   3
   3  -2  18 1680.40 170.436   2
   3  -2  18 1557.49 209.258   1
   3   2 -18 1676.38 130.854   5
   3  -2  18 1765.18 225.682   3
  -3  -2 -18 1899.99 198.123   3
   3  -2  17 1218.95 147.264   2
  -3   2  17 1536.81 196.267   3
   3  -2  17 1470.51 197.249   1
   3   2 -17 1431.57 120.153   5
   3  -2  17 1512.65 205.780   3
  -3  -2 -17 1486.77 175.319   3
   3  -2  16 2626.48 214.616   2
  -3   2  16 2881.35 262.338   3
   3   2 -16 2681.38 160.585   5
   3  -2  16 3043.07 290.583   3
  -3   2  16 2871.35 250.796   4
  -3  -2 -16 2577.60 232.765   3
   3  -2  15 2270.03 197.701   2
  -3   2  15 2408.64 241.838   3
   3   2 -15 2331.65 149.894   5
  -3  -2 -15 2649.53 283.819   5
   3  -2  15 2447.14 258.309   3
  -3  -2 -15 2420.48 225.842   3
  -3   2  15 2261.58 221.232   4
  -3  -2 -14 553.281 114.551   3
   3  -2  14 668.399 137.558   3
  -3   2  14 673.860 135.480   3
   3   2 -14 532.807 70.8866   5
  -3  -2 -14 516.079 133.769   5
  -3   2  14 386.792 91.6622   4
  -3  -2 -13 899.327 145.725   3
   3  -2  13 1085.18 180.071   3
  -3   2  13 719.315 134.816   3
  -3  -2 -13 872.828 130.833   1
   3   2 -13 845.386 88.5308   5
  -3  -2 -13 1055.82 178.714   5
  -3   2  13 957.271 144.607   4
  -3   2  12 2107.03 223.383   3
  -3  -2 -12 2245.73 206.757   1
   3   2 -12 2272.45 150.485   5
  -3  -2 -12 2572.10 267.669   5
   3  -2  12 2153.31 244.190   3
  -3   2  12 2549.45 237.204   4
  -3  -2 -12 2369.94 230.534   3
  -3  -2 -11 626.658 126.424   3
   3  -2  11 816.685 149.457   3
  -3   2  11 550.962 122.026   3
  -3  -2 -11 449.977 91.8932   1
   3   2 -11 659.824 81.3887   5
  -3  -2 -11 597.746 128.514   5
  -3   2  11 576.796 113.129   4
  -3   2  10 5708.82 362.242   3
  -3  -2 -10 5950.23 317.754   1
  -3  -2 -10 6521.29 406.977   5
   3   2 -10 5634.65 246.135   5
  -3  -2 -10 5873.42 366.891   3
  -3   2  10 5938.42 361.851   4
   3  -2  10 5767.20 387.835   3
  -3   2   9 1845.35 211.967   3
  -3  -2  -9 1906.04 175.586   1
   3   2  -9 1744.93 138.156   5
  -3  -2  -9 2183.91 229.455   5
  -3   2   9 1972.04 209.300   4
   3  -2   9 1779.37 221.402   3
  -3  -2  -9 1802.23 210.383   3
  -3  -2  -8 2000.14 172.319   1
  -3   2   8 2294.97 96.4540   5
  -3  -2  -8 2403.76 235.591   5
   3   2  -8 2413.19 163.210   5
  -3   2   8 2204.87 220.736   4
   3  -2   8 2214.23 243.399   3
  -3  -2  -8 2377.78 237.593   3
  -3  -2  -7-38.8160 62.4033   3
   3  -2   7-13.8149 37.2401   3
  -3  -2  -7 37.6016 35.1537   1
  -3   2   7 16.3036 10.8557   5
   3   2  -7 7.91927 25.2640   5
  -3   2   7 6.16357 30.2679   4
  -3  -2  -7 45.6185 47.9427   5
  -3  -2  -6 2354.03 176.869   1
  -3   2   6 2407.19 123.471   5
  -3  -2  -6 2393.60 226.943   5
  -3   2   6 2191.51 229.693   4
   3  -2   6 2520.30 257.856   3
  -3  -2  -6 2410.31 237.646   3
  -3   2   5 2513.76 136.315   5
  -3  -2  -5 2343.01 217.889   5
  -3   2   5 2569.30 239.805   4
   3  -2   5 2531.14 259.355   3
  -3  -2  -5 2475.81 245.855   3
   3  -2   4 621.838 130.169   3
  -3  -2  -4 573.181 128.177   3
  -3  -2  -4 555.861 109.280   5
  -3   2   4 521.890 105.102   4
  -3  -2  -3 5705.07 322.244   5
   3  -2   3 5736.14 385.436   3
  -3   2   3 5402.25 348.786   4
  -3  -2  -3 5377.60 369.159   3
  -3  -2  -2 6731.95 343.029   5
   3  -2   2 7009.18 425.609   3
  -3  -2  -1 1680.45 167.694   5
   3  -2   1 1796.83 223.418   3
  -3  -2   0 11051.8 417.488   5
   3  -2   0 11659.1 550.671   3
  -3  -2   1 1657.22 158.410   5
   3  -2  -1 1760.05 218.990   3
   3  -2  -2 6947.04 197.183   1
  -3  -2   2 6796.48 307.567   5
   3  -2  -2 7009.29 427.571   3
   3  -2  -3 5398.78 184.080   1
  -3  -2   3 5279.62 267.535   5
   3  -2  -3 5260.81 371.023   3
   3  -2  -4 599.001 131.755   3
   3  -2  -4 478.241 59.1127   1
  -3  -2   4 471.549 75.9848   5
   3  -2  -5 2501.51 141.902   1
  -3  -2   5 2415.59 171.326   5
   3  -2  -5 2871.61 268.685   3
   3  -2  -6 2543.69 151.599   1
  -3  -2   6 2407.29 166.194   5
   3  -2  -6 2617.89 261.821   3
  -3   2  -7 78.3770 72.2020   3
   3  -2  -7-34.1186 41.3294   3
  -3  -2   7 29.0995 23.6073   5
  -3  -2   7 66.6231 48.6759   4
  -3   2  -8 2298.96 217.019   3
  -3  -2   8 2114.22 151.412   5
  -3  -2   8 2326.91 234.557   4
   3  -2  -8 2353.35 247.497   3
  -3   2  -9 1715.01 188.042   3
  -3  -2   9 1799.85 136.278   5
  -3  -2   9 1871.04 208.931   4
  -3  -2   9 1819.99 233.165   3
   3  -2  -9 1833.20 223.323   3
  -3   2 -10 5597.58 329.700   3
  -3  -2  10 5579.70 235.793   5
  -3  -2  10 5972.99 372.714   4
  -3  -2  10 5995.57 413.559   3
   3  -2 -10 6208.19 403.924   3
  -3   2 -11 684.516 119.120   3
  -3  -2  11 663.932 82.4910   5
   3  -2 -11 541.910 122.303   3
  -3  -2  11 766.050 151.558   3
  -3  -2  11 812.309 138.632   4
  -3   2 -12 2349.03 211.527   3
  -3  -2  12 2419.13 234.506   4
  -3  -2  12 2509.61 270.167   3
   3  -2 -12 2624.09 261.010   3
  -3   2 -13 907.226 129.958   3
  -3  -2  13 794.124 158.855   3
   3  -2 -13 712.089 139.785   3
  -3  -2  13 716.629 127.504   4
  -3   2 -14 603.903 108.700   3
  -3  -2  14 683.921 151.246   3
   3  -2 -14 573.117 123.047   3
  -3  -2  14 661.144 120.722   4
  -3   2 -15 2292.88 209.238   3
  -3  -2  15 2528.63 234.736   4
   3  -2 -15 2432.72 283.687   4
   3  -2 -15 2265.93 244.683   3
  -3  -2  15 2491.86 276.815   3
   3   2  16 2650.63 228.534   2
  -3   2 -16 2636.19 216.456   3
  -3  -2  16 3178.98 260.307   4
   3  -2 -16 3046.59 277.989   3
   3  -2 -16 3135.78 314.211   4
  -3  -2  16 2840.77 292.297   3
   3  -2 -17 1699.41 179.436   2
  -3   2 -17 1389.80 156.049   3
   3   2  17 1245.47 156.449   2
  -3  -2  17 1182.24 194.187   3
   3  -2 -17 1536.86 226.434   4
  -3  -2  17 1502.86 180.524   4
   3  -2 -17 1473.25 196.462   3
   3  -2 -18 2173.84 206.823   2
   3   2  18 1569.67 174.289   2
  -3   2 -18 1635.37 166.909   3
   3  -2 -18 1734.60 238.835   4
  -3  -2  18 1734.68 193.230   4
   3  -2 -18 1878.04 221.272   3
  -3  -2  18 1737.72 235.060   3
  -3   2 -19 3874.13 259.282   3
   3   2  19 3745.81 270.323   2
  -3  -2  19 4118.70 292.932   4
   3  -2 -19 4169.27 324.885   3
  -3  -2  19 3740.30 336.847   3
   3  -2 -19 4218.30 371.234   4
  -3   2 -20 1326.71 151.083   3
   3   2  20 1260.75 162.340   2
   3  -2 -20 1492.43 230.277   4
  -3  -2  20 1536.42 176.924   4
  -3  -2  20 1279.61 208.589   3
   3  -2 -20 1043.64 163.243   3
   3   2  21 440.139 96.8782   2
  -3   2 -21 646.947 107.917   3
   3  -2 -21 377.735 131.178   4
  -3  -2  21 516.382 132.871   3
  -3   2 -22 1441.18 150.482   3
   3   2  22 1540.15 179.497   2
   3  -2 -22 1488.01 238.487   4
  -3  -2  22 1945.11 250.793   3
   3   2  23 879.319 139.501   2
   3  -2 -23 1236.57 224.558   4
  -3  -2  23 1103.12 194.993   3
   3   2  24 3166.84 257.785   2
   3  -2 -24 3643.13 375.605   4
  -3  -2  24 3616.37 347.321   3
   3   2  25 218.204 71.4258   2
   3  -2 -25 330.269 136.961   4
  -3  -2  25 353.507 118.421   3
   3   2  26 1143.74 157.652   2
  -3  -2  26 1406.73 217.570   3
   3  -2 -26 1323.76 237.856   4
   3   2  27 815.871 139.165   2
   3  -2 -27 855.662 55.9916   5
  -3  -2  27 784.137 168.507   3
   3  -2 -27 1106.87 215.214   4
   3   2  28 554.998 114.875   2
   3  -2 -28 727.067 191.094   4
  -3  -2  28 455.309 144.010   3
   3   2  29 373.497 90.1743   2
   3  -2 -29 502.593 168.164   4
  -3  -2  29 432.229 125.152   3
   3   2  30 137.457 62.6170   2
   3  -2 -30 329.628 136.757   4
  -3  -2  30 306.690 115.271   3
   3   2  31 691.230 131.640   2
  -3  -2  31 395.299 119.196   3
   3  -2 -31 736.606 192.893   4
   3   2  32 301.153 90.5026   2
  -3  -2  32 274.148 104.267   3
   3  -2 -32 440.886 158.336   4
   3   2  33 132.078 64.6022   2
  -3  -2  33 256.381 102.547   3
   3  -2 -33 278.986 135.541   4
   3   2  34 299.385 91.3312   2
  -3  -2  34 114.728 66.0372   3
   3  -2 -34 262.720 126.250   4
   3   2  35 622.153 129.348   2
  -3  -2  35 600.980 152.115   3
   3  -2 -35 755.030 229.401   4
   3   2  36 123.650 79.8552   2
  -3  -2  36 113.607 58.9520   3
   3  -2 -36 111.790 104.943   4
   3   2  37 565.917 132.101   2
   3  -2 -37 769.987 240.265   4
   3   2  38 138.149 84.5581   2
   3  -2 -38 345.951 161.031   4
   3   3 -42 186.701 166.102   4
   3   3 -41 64.2337 116.700   4
   3   3 -40 427.202 173.219   4
   3  -3  39 128.250 73.9167   2
   3   3 -39 41.4025 90.2851   4
   3  -3  38 106.352 75.4443   2
   3   3 -38 700.526 218.612   4
   3  -3  37 434.763 110.923   2
   3   3 -37 167.394 125.070   4
   3  -3  36 364.347 108.404   2
   3   3 -36 308.609 129.032   4
   3  -3  35 410.747 101.491   2
   3   3 -35 100.891 93.8265   4
   3  -3  34 387.039 101.188   2
   3   3 -34 306.067 131.508   4
   3  -3  33 143.626 60.2704   2
   3   3 -33 225.513 107.288   4
   3  -3  32 214.741 81.1728   2
  -3   3  32 133.281 53.4667   3
   3   3 -32 180.038 90.8495   4
  -3   3  31 78.9753 50.8933   3
   3  -3  31 165.029 76.6131   2
   3   3 -31 193.500 69.2605   5
   3   3 -31 82.9306 74.6932   4
  -3   3  30 753.325 122.128   3
   3  -3  30 699.019 122.877   2
   3   3 -30 678.319 118.630   5
   3   3 -30 527.589 153.573   4
  -3   3  29 70.5399 42.4952   3
   3  -3  29 121.574 75.2686   3
   3  -3  29 75.5480 52.5841   2
   3   3 -29 81.3777 40.7754   5
   3   3 -29 33.7181 65.4182   4
   3  -3  28 145.025 87.8210   3
  -3  -3 -28 57.3742 30.8910   3
  -3   3  28 31.1598 28.5280   3
   3   3 -28 90.6985 43.0162   5
   3  -3  28 74.8972 59.1218   2
   3  -3  27 907.487 168.316   3
  -3  -3 -27 774.444 95.8657   3
  -3   3  27 802.540 132.073   3
   3  -3  27 984.613 142.802   2
   3   3 -27 972.794 141.850   5
  -3   3  26 5700.60 346.442   3
  -3  -3 -26 5045.74 257.291   3
   3  -3  26 4778.72 305.750   2
   3   3 -26 5776.70 326.318   5
   3  -3  26 5431.97 423.444   3
  -3  -3 -25 1313.14 141.951   3
  -3   3  25 1464.20 187.027   3
   3  -3  25 1393.89 217.817   3
   3  -3  25 1350.33 167.561   2
   3   3 -25 1301.94 156.288   5
  -3  -3 -24 2092.63 184.712   3
  -3   3  24 2156.02 218.229   3
   3  -3  24 1803.70 188.196   2
   3   3 -24 2205.10 197.951   5
   3  -3  24 1926.57 248.956   3
  -3  -3 -23 2079.40 189.780   3
  -3   3  23 2110.73 217.332   3
   3  -3  23 2011.16 192.633   2
   3   3 -23 2112.44 191.027   5
   3  -3  23 2074.72 256.444   3
  -3   3  22 355.163 97.0876   3
   3  -3  22 196.221 91.3308   3
  -3  -3 -22 352.974 87.0926   3
   3  -3  22 286.444 71.3031   2
   3   3 -22 347.543 77.6519   5
   3  -3  21 1474.18 163.628   2
  -3   3  21 1812.29 202.555   3
  -3  -3 -21 1605.24 236.495   1
   3   3 -21 1760.20 167.966   5
   3  -3  21 1740.43 234.447   3
  -3  -3 -21 2078.13 200.779   3
  -3   3  20 372.594 101.004   3
  -3  -3 -20 285.495 80.6787   3
   3  -3  20 275.683 98.8884   3
   3  -3  20 275.481 74.9062   2
  -3  -3 -20 293.973 98.1697   1
   3   3 -20 308.155 66.2143   5
   3  -3  19 2722.41 216.279   2
  -3   3  19 2638.62 245.311   3
  -3  -3 -19 2799.97 295.432   1
   3   3 -19 2726.45 204.698   5
   3  -3  19 2954.41 300.306   3
  -3  -3 -19 2602.40 234.018   3
  -3   3  18 4954.02 332.599   3
   3  -3  18 4778.26 286.840   2
  -3  -3 -18 4745.69 374.732   1
   3   3 -18 5183.53 277.329   5
   3  -3  18 4888.47 384.531   3
  -3  -3 -18 4891.46 326.335   3
  -3   3  17 1250.91 171.718   3
   3  -3  17 1207.93 190.140   3
   3  -3  17 1017.84 130.563   2
  -3  -3 -17 1356.13 201.136   1
   3   3 -17 1131.76 130.062   5
  -3  -3 -17 1093.58 160.430   3
  -3   3  16 1913.71 209.656   3
   3  -3  16 1874.54 174.989   2
  -3  -3 -16 1946.01 230.263   1
   3   3 -16 1699.12 158.997   5
   3  -3  16 1766.71 234.557   3
  -3  -3 -16 1812.36 205.320   3
  -3   3  15 1647.01 194.509   3
   3  -3  15 1407.65 156.510   2
  -3  -3 -15 1440.61 217.396   5
   3   3 -15 1703.74 157.243   5
  -3  -3 -15 1581.81 191.297   3
   3  -3  15 1751.41 229.198   3
  -3   3  15 1345.79 169.422   4
  -3  -3 -14 273.035 85.8277   3
  -3   3  14 213.683 74.5525   3
   3  -3  14 385.669 116.186   3
   3  -3  14 220.532 64.4836   2
   3   3 -14 348.337 71.1142   5
  -3  -3 -14 284.350 100.919   5
  -3   3  14 269.330 81.5573   4
  -3  -3 -13 654.637 128.346   3
  -3   3  13 609.689 119.495   3
   3  -3  13 649.064 139.273   3
   3   3 -13 511.360 87.5921   5
  -3  -3 -13 437.766 119.626   5
  -3   3  13 727.942 122.919   4
  -3   3  12 326.912 92.5634   3
  -3  -3 -12 345.272 99.3955   3
   3  -3  12 300.009 91.6643   3
   3   3 -12 307.559 70.4901   5
  -3  -3 -12 279.809 89.7162   5
  -3   3  12 374.251 44.4555   5
  -3   3  12 333.463 88.5605   4
  -3  -3 -11 258.949 83.5476   3
  -3   3  11 346.290 88.8147   3
   3  -3  11 313.015 93.6123   3
  -3  -3 -11 202.189 65.6497   1
  -3   3  11 285.945 40.4369   5
   3   3 -11 290.648 64.2940   5
  -3  -3 -11 307.296 93.7863   5
  -3   3  11 258.779 78.4484   4
  -3  -3 -10 715.299 141.188   3
  -3   3  10 747.593 131.281   3
   3  -3  10 814.941 153.557   3
  -3  -3 -10 787.151 129.492   1
   3   3 -10 817.105 110.283   5
  -3   3  10 1012.54 80.7642   5
  -3  -3 -10 888.962 156.465   5
  -3   3  10 923.332 140.009   4
  -3   3   9 4096.34 3064.01   3
   3   3  -9 3660.01 2380.20   5
  -3   3   9 3862.50 1699.74   5
  -3  -3  -9 2940.37 2793.68   5
  -3   3   9 3532.15 2776.87   4
   3  -3   9 3280.62 3068.33   3
  -3  -3  -9 4636.16 3423.30   3
   3  -3   8 1067.46 172.927   3
  -3   3   8 1092.97 159.776   3
  -3   3   8 1165.22 97.1914   5
   3   3  -8 1119.57 130.132   5
  -3  -3  -8 1289.52 179.874   5
  -3   3   8 1222.23 162.962   4
  -3  -3  -8 1165.48 172.063   3
  -3   3   7 800.231 137.778   3
   3  -3   7 735.523 144.562   3
  -3   3   7 923.097 91.4834   5
  -3  -3  -7 805.188 142.997   5
  -3   3   7 809.014 134.242   4
  -3  -3  -7 620.706 130.331   3
   3   3  -7 659.613 100.867   5
  -3   3   6 3015.16 262.259   3
  -3   3   6 2726.32 163.669   5
  -3  -3  -6 2488.39 240.460   5
   3   3  -6 2886.18 217.856   5
   3  -3   6 2527.72 265.825   3
  -3   3   6 2778.72 247.390   4
  -3  -3  -6 3182.76 289.128   3
  -3   3   5 1768.30 199.267   3
  -3   3   5 1658.27 133.541   5
   3   3  -5 1965.63 179.996   5
  -3  -3  -5 2172.30 222.978   5
  -3   3   5 1944.15 205.923   4
  -3  -3  -5 1951.82 227.940   3
   3  -3   5 1766.79 222.193   3
  -3   3   4 609.090 124.418   3
   3  -3   4 594.995 126.133   3
  -3   3   4 529.481 75.9236   5
  -3  -3  -4 744.927 131.542   5
  -3   3   4 630.824 115.280   4
   3   3  -4 694.966 110.327   5
  -3  -3  -4 730.037 136.478   3
  -3   3   3 1920.01 152.799   5
  -3  -3  -3 1960.66 205.449   5
   3   3  -3 2085.92 193.240   5
  -3   3   3 1816.34 200.870   4
   3  -3   3 1955.71 232.889   3
  -3  -3  -3 1916.75 222.724   3
   3  -3   2 328.877 99.8027   3
  -3  -3  -2 261.156 77.3144   5
  -3   3   2 294.984 65.0743   5
   3   3  -2 400.855 93.2110   5
  -3   3   2 340.830 87.3036   4
  -3  -3  -2 356.339 104.528   3
  -3  -3  -1 4652.58 299.106   5
   3  -3   1 4580.64 359.096   3
  -3   3   1 4620.10 319.747   4
  -3  -3  -1 4998.53 364.649   3
  -3  -3   0 4892.37 300.799   5
   3  -3   0 5091.97 374.706   3
  -3  -3   1 4576.62 283.482   5
   3  -3  -1 5165.48 376.638   3
   3  -3  -2 400.485 115.996   3
  -3  -3   2 260.204 66.4682   5
  -3  -3   3 1746.41 171.174   5
   3  -3  -3 2135.10 240.383   3
   3  -3  -4 774.176 150.968   3
  -3  -3   4 692.523 107.745   5
  -3  -3   5 1795.12 166.620   5
   3  -3  -5 2090.50 242.415   3
   3  -3  -6 2645.47 195.750   1
  -3  -3   6 2497.08 196.218   5
   3  -3  -6 2816.68 280.474   3
   3  -3  -7 890.399 157.513   3
  -3   3  -7 613.387 110.395   3
   3  -3  -7 596.533 91.3158   1
  -3  -3   7 775.303 108.906   5
  -3   3  -8 1084.46 148.787   3
   3  -3  -8 1163.58 136.695   1
  -3  -3   8 1114.11 127.712   5
   3  -3  -8 1406.30 200.498   3
  -3  -3   8 1264.32 175.226   4
  -3   3  -9 3788.30 276.403   3
   3  -3  -9 3840.29 256.190   1
  -3  -3   9 3174.85 216.772   5
  -3  -3   9 4327.59 363.758   3
  -3  -3   9 3676.67 294.438   4
   3  -3  -9 3383.23 309.979   3
   3  -3 -10 1006.55 168.306   3
  -3   3 -10 907.613 139.048   3
   3  -3 -10 882.202 126.629   1
  -3  -3  10 953.743 118.346   5
  -3  -3  10 1028.33 155.263   4
  -3  -3  10 1163.75 197.265   3
   3  -3 -11 241.921 84.3643   3
  -3   3 -11 331.500 96.4573   3
   3  -3 -11 240.167 68.1652   1
  -3  -3  11 300.951 67.7864   5
  -3  -3  11 421.992 119.589   3
  -3  -3  11 301.058 81.0805   4
   3  -3 -12 213.658 81.7331   3
  -3   3 -12 487.074 101.055   3
   3  -3 -12 287.415 79.2750   1
  -3  -3  12 270.459 63.0217   5
  -3  -3  12 508.117 125.282   3
  -3  -3  12 344.398 87.4189   4
   3  -3 -13 544.624 108.178   1
   3  -3 -13 647.606 132.736   3
  -3   3 -13 522.061 102.266   3
  -3  -3  13 650.975 149.380   3
  -3  -3  13 687.621 121.377   4
   3  -3 -14 332.474 82.6201   1
   3  -3 -14 246.365 86.0621   3
  -3   3 -14 269.164 77.9007   3
  -3  -3  14 346.963 110.793   3
   3  -3 -14 480.504 143.128   4
  -3  -3  14 230.807 68.6720   4
   3  -3 -15 1472.26 193.112   1
  -3   3 -15 1516.66 168.194   3
   3   3  15 1364.15 167.275   2
  -3  -3  15 1524.79 182.761   4
  -3  -3  15 1693.45 239.266   3
   3  -3 -15 1866.18 255.745   4
   3  -3 -15 1632.15 214.659   3
   3  -3 -16 1886.38 184.155   2
  -3   3 -16 1685.89 175.782   3
   3   3  16 1366.52 165.011   2
  -3  -3  16 1805.46 194.834   4
  -3  -3  16 1835.05 242.393   3
   3  -3 -16 2427.24 276.999   4
   3  -3 -16 1891.83 237.318   3
   3  -3 -17 1390.14 165.987   2
   3   3  17 1075.58 145.856   2
  -3   3 -17 1227.26 147.972   3
   3  -3 -17 1428.14 216.975   4
  -3  -3  17 1198.34 158.309   4
  -3  -3  17 1432.36 226.137   3
   3  -3 -17 1022.07 168.885   3
   3  -3 -18 4286.15 283.309   2
  -3   3 -18 4825.99 290.902   3
   3   3  18 4141.94 287.196   2
  -3  -3  18 4609.01 309.667   4
  -3  -3  18 4950.76 407.000   3
   3  -3 -18 4952.43 407.892   4
   3  -3 -18 4552.79 354.184   3
  -3   3 -19 2476.04 209.033   3
   3   3  19 2071.74 203.103   2
  -3  -3  19 2350.78 218.400   4
  -3  -3  19 2511.79 294.658   3
   3  -3 -19 3191.43 333.337   4
   3  -3 -19 2651.38 268.387   3
   3   3  20 372.489 106.398   2
   3  -3 -20 217.149 119.693   4
  -3  -3  20 478.232 146.580   3
  -3  -3  20 301.773 84.1111   4
   3  -3 -20 222.756 70.5141   3
   3   3  21 1563.56 184.609   2
   3  -3 -21 1920.54 271.563   4
   3  -3 -21 1489.07 203.222   3
  -3  -3  21 1840.67 259.270   3
   3   3  22 423.947 111.485   2
   3  -3 -22 281.770 92.2485   3
   3  -3 -22 436.920 171.757   4
  -3  -3  22 445.748 132.751   3
   3   3  23 1995.79 210.522   2
   3  -3 -23 2033.72 90.8603   5
   3  -3 -23 1990.44 225.187   3
   3  -3 -23 2185.86 305.730   4
  -3  -3  23 2031.60 271.271   3
   3   3  24 1981.01 209.965   2
   3  -3 -24 1735.67 90.5394   5
   3  -3 -24 2337.30 312.186   4
  -3  -3  24 2013.45 280.935   3
   3   3  25 1272.68 170.786   2
   3  -3 -25 1285.94 82.5203   5
   3  -3 -25 1877.32 295.532   4
  -3  -3  25 1342.57 229.363   3
   3   3  26 4942.63 329.568   2
   3  -3 -26 5125.36 175.474   5
   3  -3 -26 5798.85 504.028   4
  -3  -3  26 4841.91 416.545   3
   3   3  27 752.530 132.255   2
   3  -3 -27 877.725 207.480   4
  -3  -3  27 730.355 168.996   3
   3   3  28 66.8590 60.8938   2
   3  -3 -28 203.755 117.865   4
  -3  -3  28 73.1235 65.0987   3
   3   3  29 109.218 64.3862   2
  -3  -3  29 115.772 71.5999   3
   3  -3 -29 159.535 109.264   4
   3   3  30 697.170 132.131   2
  -3  -3  30 542.108 143.064   3
   3  -3 -30 809.715 204.146   4
   3   3  31 152.606 76.6692   2
  -3  -3  31 118.726 72.1716   3
   3   3  32 253.817 85.7981   2
  -3  -3  32 212.881 95.2686   3
   3  -3 -32 267.869 154.928   4
   3   3  33 204.362 68.4466   2
  -3  -3  33 9.02732 65.2854   3
   3  -3 -33 270.648 155.400   4
   3   3  34 278.269 86.0940   2
  -3  -3  34 223.534 103.593   3
   3   3  35 214.316 84.6861   2
  -3  -3  35 218.671 106.134   3
   3  -3 -35 380.240 188.600   4
   3   3  36 277.585 86.3198   2
  -3  -3  36 374.908 129.908   3
   3  -3 -36 289.597 143.437   4
   3   3  37 294.127 106.392   2
  -3  -3  37 219.355 115.333   3
   3  -3 -37 461.201 192.975   4
   3  -4  39 183.700 81.4548   2
   3  -4  38 204.256 72.1461   2
   3  -4  37 466.871 119.607   2
   3  -4  36 458.642 113.631   2
   3  -4  35 408.752 105.096   2
   3  -4  34 46.7557 53.0223   2
   3  -4  33 179.453 84.6226   2
   3  -4  32 74.0927 45.8332   2
  -3   4  31 168.018 54.6876   3
   3   4 -31 121.130 76.5078   5
   3  -4  31 291.784 85.6857   2
  -3   4  30 623.044 103.981   3
   3   4 -30 499.816 123.737   5
   3  -4  30 537.997 110.729   2
  -3   4  29 390.122 83.4916   3
   3   4 -29 661.276 131.300   5
   3  -4  29 624.549 114.891   2
  -3   4  28 719.662 114.907   3
   3   4 -28 728.013 139.207   5
   3  -4  28 775.269 125.067   2
  -3  -4 -27 383.549 76.3073   3
  -3   4  27 316.981 76.9895   3
   3   4 -27 189.814 77.2502   5
   3  -4  27 222.650 73.7551   2
  -3  -4 -26 1797.14 164.847   3
  -3   4  26 1742.91 183.162   3
   3  -4  26 1766.21 181.518   2
   3   4 -26 2187.49 226.848   5
  -3  -4 -25 1073.38 134.177   3
   3  -4  25 948.135 137.090   2
  -3   4  25 1092.80 146.336   3
   3   4 -25 1224.16 168.009   5
  -3  -4 -25 955.908 202.073   1
  -3   4  24 160.031 61.2561   3
  -3  -4 -24 183.003 62.9095   3
   3   4 -24 208.720 74.5906   5
  -3  -4 -24 24.8309 88.5307   1
   3  -4  24 230.233 68.7750   2
  -3   4  23 375.067 84.4272   3
  -3  -4 -23 318.408 79.5716   3
   3   4 -23 365.243 92.9857   5
   3  -4  23 227.373 64.4688   2
  -3  -4 -23 523.121 141.825   1
  -3  -4 -22-31.3125 42.9206   3
  -3   4  22-28.6125 40.0409   3
  -3  -4 -22-54.2727 76.9198   1
   3  -4  22-1.87722 29.1928   2
   3   4 -22 92.7578 60.4136   5
   3  -4  21 1614.86 163.530   2
  -3   4  21 1619.05 180.953   3
  -3  -4 -21 1415.61 228.156   1
   3   4 -21 1890.28 197.132   5
  -3  -4 -21 1809.67 199.366   3
   3  -4  20 1504.31 157.536   2
  -3   4  20 1490.09 172.259   3
  -3  -4 -20 1518.55 232.143   1
   3   4 -20 1937.65 196.539   5
  -3  -4 -20 1430.00 180.774   3
   3  -4  19 2058.81 185.318   2
  -3   4  19 1782.07 194.446   3
  -3  -4 -19 1989.66 260.916   1
   3   4 -19 2435.27 220.442   5
  -3  -4 -19 2101.89 218.657   3
   3  -4  18 4154.17 376.225   3
  -3   4  18 3604.94 274.729   3
   3  -4  18 3879.02 254.159   2
  -3  -4 -18 3444.88 339.741   1
   3   4 -18 4656.42 299.832   5
  -3  -4 -18 3869.31 300.354   3
  -3  -4 -17 1037.93 159.693   3
  -3   4  17 1014.95 148.466   3
   3  -4  17 1151.45 193.912   3
   3  -4  17 1171.02 138.922   2
   3   4 -17 1224.19 160.052   5
  -3  -4 -17 773.172 162.645   1
  -3  -4 -16 244.421 84.0365   3
  -3   4  16 286.562 72.1676   3
   3  -4  16 477.443 135.800   3
   3  -4  16 380.527 78.7421   2
  -3  -4 -16 265.784 97.2561   1
   3   4 -16 428.862 95.1615   5
   3  -4  15 2244.73 266.875   3
  -3   4  15 1719.01 189.046   3
   3  -4  15 1943.25 177.074   2
  -3  -4 -15 1795.11 231.593   1
   3   4 -15 2062.14 197.474   5
  -3  -4 -15 1839.71 214.585   3
  -3   4  14 2021.94 204.549   3
   3  -4  14 2084.66 180.072   2
   3  -4  14 2296.04 266.033   3
  -3  -4 -14 2224.93 253.862   1
  -3   4  14 1966.14 137.090   5
   3   4 -14 2215.56 204.483   5
  -3   4  14 2037.34 207.105   4
  -3  -4 -14 2110.57 230.693   3
  -3   4  13 194.605 72.8940   3
   3  -4  13 365.507 106.899   3
  -3  -4 -13 239.248 77.0915   1
   3  -4  13 300.175 69.5568   2
  -3   4  13 214.972 44.0162   5
  -3  -4 -13 253.812 96.0430   5
   3   4 -13 258.805 71.1612   5
  -3   4  13 198.468 69.8886   4
  -3  -4 -13 289.272 88.1221   3
   3  -4  12 1980.86 250.705   3
  -3   4  12 1715.82 190.103   3
  -3   4  12 1955.28 143.342   5
  -3  -4 -12 1855.98 240.563   5
   3   4 -12 1883.83 187.783   5
  -3   4  12 1584.34 182.745   4
  -3  -4 -12 1773.81 211.389   3
   3  -4  11 4932.53 389.050   3
  -3   4  11 3708.67 281.327   3
  -3   4  11 4265.77 213.491   5
   3   4 -11 4713.46 297.294   5
  -3  -4 -11 4469.34 365.170   5
  -3   4  11 4020.21 288.854   4
  -3  -4 -11 3974.49 319.160   3
   3  -4  10 2330.84 265.658   3
  -3   4  10 2196.72 218.158   3
   3   4 -10 2286.91 208.201   5
  -3  -4 -10 2369.18 265.093   5
  -3   4  10 2251.09 159.397   5
  -3   4  10 2092.77 207.893   4
  -3  -4 -10 2232.40 242.517   3
   3  -4   9 2023.25 244.226   3
  -3   4   9 1999.00 206.833   3
   3   4  -9 1906.37 191.247   5
  -3  -4  -9 2029.99 242.350   5
  -3   4   9 1961.59 151.074   5
  -3   4   9 1811.28 194.496   4
  -3  -4  -9 2105.52 240.251   3
   3  -4   8 3594.97 332.347   3
  -3   4   8 3369.67 264.762   3
  -3  -4  -8 3577.56 311.838   5
   3   4  -8 3625.00 266.268   5
  -3   4   8 3371.42 203.175   5
  -3   4   8 3294.50 262.967   4
  -3  -4  -8 3498.55 301.231   3
  -3   4   7 394.438 101.024   3
   3  -4   7 454.868 120.768   3
  -3   4   7 441.495 75.7583   5
  -3  -4  -7 371.373 100.621   5
   3   4  -7 394.945 94.9352   5
  -3   4   7 300.250 83.3512   4
  -3  -4  -7 310.615 103.421   3
  -3   4   6 1089.58 155.274   3
   3  -4   6 980.341 176.012   3
  -3  -4  -6 1126.07 181.545   5
  -3   4   6 1006.67 116.666   5
   3   4  -6 935.268 138.191   5
  -3   4   6 1247.81 162.519   4
  -3  -4  -6 1009.17 165.540   3
   3  -4   5 5280.49 395.817   3
  -3   4   5 5642.77 345.069   3
  -3  -4  -5 6012.19 385.628   5
  -3   4   5 5648.12 279.398   5
   3   4  -5 5318.48 329.653   5
  -3   4   5 5801.24 350.571   4
  -3  -4  -5 5838.72 400.242   3
  -3   4   4 4584.31 309.997   3
   3  -4   4 4801.95 380.448   3
  -3   4   4 5012.50 268.688   5
   3   4  -4 5023.31 324.302   5
  -3  -4  -4 5223.70 353.772   5
  -3   4   4 5031.78 328.277   4
  -3  -4  -4 5093.68 379.363   3
  -3   4   3 3473.91 271.734   3
  -3   4   3 3134.04 216.123   5
  -3  -4  -3 3397.12 282.357   5
   3   4  -3 3698.54 279.685   5
  -3   4   3 2893.26 244.883   4
  -3  -4  -3 3129.57 297.025   3
   3  -4   3 3235.82 307.106   3
  -3   4   2 2999.43 249.334   3
  -3   4   2 2855.77 211.795   5
   3   4  -2 3275.53 264.330   5
  -3  -4  -2 2812.49 253.540   5
   3  -4   2 3135.10 301.451   3
  -3  -4  -2 3221.30 299.927   3
  -3   4   2 3255.87 265.688   4
  -3   4   1 393.754 100.647   3
   3  -4   1 429.706 113.939   3
  -3  -4  -1 346.489 89.7384   5
  -3   4   1 337.674 76.9474   5
   3   4  -1 507.859 107.231   5
  -3   4   1 453.528 95.4154   4
  -3  -4  -1 448.885 119.560   3
   3  -4   0 103.183 60.2608   3
  -3   4   0 34.3115 29.1907   5
  -3  -4   0 28.9445 25.3038   5
   3   4   0 29.5971 34.0654   5
  -3  -4   0 68.1225 63.9484   3
  -3   4   0 10.7613 36.7554   4
   3  -4  -1 425.697 117.819   3
  -3  -4   1 399.689 94.6881   5
   3   4   1 485.123 107.160   5
  -3  -4   1 488.408 120.932   3
  -3   4  -1 554.396 111.968   4
  -3  -4   2 3200.34 257.158   5
   3   4   2 3418.19 291.509   5
   3  -4  -2 3158.64 303.159   3
  -3  -4   2 3268.07 308.193   3
  -3  -4   3 3028.84 249.467   5
  -3  -4   3 3342.62 321.357   3
   3  -4  -3 3521.75 320.870   3
  -3  -4   4 4595.50 302.557   5
  -3  -4   4 5153.26 389.552   3
   3  -4  -4 5376.44 399.220   3
  -3   4  -5 5061.37 317.500   3
  -3  -4   5 5162.86 316.523   5
   3  -4  -5 5934.89 419.455   3
   3  -4  -6 1076.81 190.519   3
  -3   4  -6 1023.14 148.278   3
  -3  -4   6 1213.50 151.227   5
   3  -4  -7 361.359 118.594   3
  -3   4  -7 506.859 108.499   3
  -3  -4   7 294.373 76.5149   5
  -3  -4   7 508.688 135.359   3
  -3   4  -8 3236.14 250.400   3
  -3  -4   8 3464.05 255.728   5
  -3  -4   8 3483.90 333.388   3
  -3  -4   8 3489.31 290.182   4
   3  -4  -8 3440.95 323.672   3
  -3   4  -9 1971.01 195.187   3
   3  -4  -9 1813.36 198.114   1
  -3  -4   9 1785.95 182.927   5
   3  -4  -9 2254.86 260.680   3
  -3  -4   9 1670.96 196.214   4
  -3   4 -10 2292.47 212.859   3
   3  -4 -10 2176.61 219.595   1
  -3  -4  10 2170.40 200.982   5
   3  -4 -10 2122.38 255.154   3
  -3  -4  10 2044.74 216.574   4
  -3   4 -11 4056.75 279.313   3
   3  -4 -11 4533.19 323.340   1
  -3  -4  11 4214.54 279.693   5
   3  -4 -11 4416.68 360.719   3
  -3  -4  11 4347.10 314.686   4
  -3   4 -12 2092.28 204.134   3
   3  -4 -12 1626.83 202.568   1
  -3  -4  12 1804.85 183.254   5
   3  -4 -12 1828.91 239.059   3
  -3  -4  12 2038.23 211.305   4
  -3   4 -13 494.161 105.653   3
   3  -4 -13 203.599 78.0771   3
   3  -4 -13 272.366 99.7271   1
  -3  -4  13 382.909 85.7029   5
  -3  -4  13 210.480 70.3257   4
   3  -4 -14 2103.24 193.515   2
   3  -4 -14 1867.54 229.269   1
  -3   4 -14 2228.56 204.138   3
  -3  -4  14 2281.50 220.851   4
   3  -4 -14 2146.87 264.112   4
   3  -4 -14 2177.30 256.910   3
   3  -4 -15 1863.60 183.004   2
   3  -4 -15 1672.72 215.832   1
  -3   4 -15 1870.21 187.079   3
   3   4  15 1750.16 191.461   2
  -3  -4  15 1910.73 200.697   4
   3  -4 -15 1840.74 249.424   4
   3  -4 -15 1744.69 231.267   3
   3   4  16 180.439 62.3872   2
   3  -4 -16 239.785 64.2336   2
   3  -4 -16 155.870 67.4670   1
   3  -4 -16 193.425 68.0650   3
   3  -4 -16 478.970 142.166   4
  -3  -4  16 381.038 86.3325   4
  -3  -4  16 534.978 141.925   3
   3  -4 -17 1003.02 180.789   1
   3  -4 -17 956.738 134.987   2
   3   4  17 890.612 133.836   2
   3  -4 -17 1090.44 183.775   3
   3  -4 -17 1086.66 204.717   4
  -3  -4  17 963.636 141.118   4
  -3  -4  17 1143.21 201.720   3
   3  -4 -18 4387.58 276.175   2
   3  -4 -18 3785.85 341.383   1
   3   4  18 3550.32 267.370   2
  -3  -4  18 3937.29 280.146   4
  -3  -4  18 4259.69 387.632   3
   3  -4 -18 3912.96 372.618   4
   3  -4 -18 4114.07 348.312   3
   3  -4 -19 1994.91 256.132   1
   3   4  19 1986.05 200.271   2
  -3  -4  19 2435.15 219.003   4
  -3  -4  19 2521.37 301.283   3
   3  -4 -19 2202.61 283.887   4
   3  -4 -19 2217.48 256.010   3
   3  -4 -20 1837.22 251.161   1
   3   4  20 1419.04 175.114   2
   3  -4 -20 1805.10 251.523   4
   3  -4 -20 1592.10 215.977   3
  -3  -4  20 1464.04 235.068   3
   3   4  21 1208.92 161.134   2
   3  -4 -21 1685.18 123.856   5
   3  -4 -21 1468.85 244.011   4
   3  -4 -21 1302.57 193.756   3
  -3  -4  21 1182.95 208.453   3
   3   4  22 61.6202 53.7159   2
   3  -4 -22 16.4331 25.6839   5
   3  -4 -22 54.0322 75.9431   4
   3  -4 -22 29.2305 36.6932   3
  -3  -4  22 37.9133 42.8558   3
   3   4  23 305.293 85.5536   2
   3  -4 -23 391.135 60.0086   5
  -3  -4  23 384.990 124.619   3
   3  -4 -23 439.897 131.242   4
   3  -4 -23 333.660 93.5747   3
   3   4  24 150.423 70.8569   2
   3  -4 -24 169.124 39.0140   5
   3  -4 -24 319.978 114.367   4
  -3  -4  24 82.5688 62.9777   3
   3  -4 -24 257.059 95.8866   3
   3   4  25 996.615 153.669   2
   3  -4 -25 1246.32 233.983   4
  -3  -4  25 1009.31 200.735   3
   3  -4 -25 1003.99 164.138   3
   3   4  26 1876.76 206.542   2
   3  -4 -26 1804.62 217.761   3
  -3  -4  26 2029.00 282.607   3
   3  -4 -26 2080.53 310.342   4
   3   4  27 197.221 71.5443   2
   3  -4 -27 388.880 149.720   4
  -3  -4  27 137.347 79.0328   3
   3   4  28 632.107 118.415   2
  -3  -4  28 842.905 185.249   3
   3  -4 -28 927.142 219.220   4
   3   4  29 377.375 100.715   2
  -3  -4  29 472.788 153.963   3
   3  -4 -29 776.688 213.822   4
   3   4  30 602.536 118.869   2
  -3  -4  30 438.012 136.381   3
   3  -4 -30 602.048 194.938   4
   3   4  31 220.336 78.5657   2
  -3  -4  31 156.702 100.347   3
   3  -4 -31 4.85505 84.8603   4
   3   4  32-42.3126 49.7245   2
  -3  -4  32 20.1777 43.8971   3
   3  -4 -32 83.1077 119.864   4
   3   4  33 33.2474 38.8337   2
  -3  -4  33 240.589 116.455   3
   3  -4 -33 304.611 156.137   4
   3   4  34 183.186 81.9632   2
  -3  -4  34 75.3130 79.4675   3
   3  -4 -34 169.143 133.202   4
   3   4  35 389.494 115.842   2
   3  -4 -35 383.106 166.250   4
  -3  -4  35 408.544 141.287   3
   3   4  36 435.575 122.500   2
  -3  -4  36 444.964 153.520   3
   3  -4 -36 846.270 255.839   4
  -3  -4  37 553.740 167.025   3
   3  -5  39-70.1988 57.7647   2
   3  -5  38 161.072 83.8524   2
   3  -5  37 151.625 79.7901   2
   3  -5  36 182.518 78.9751   2
   3  -5  35 192.285 76.2456   2
   3  -5  34 32.7192 50.9089   2
   3  -5  33 386.666 113.562   2
   3  -5  32 20.5646 39.2424   2
   3   5 -31 101.834 64.7028   5
   3  -5  31 124.585 59.3472   2
  -3   5  30 349.454 74.4474   3
   3   5 -30 172.939 69.6985   5
   3  -5  30 163.475 64.3939   2
  -3   5  29 77.3332 36.9106   3
   3   5 -29 8.35012 36.6858   5
   3  -5  29 54.1039 31.5723   2
  -3   5  28 59.2567 40.9878   3
   3   5 -28 97.2306 62.8941   5
  -3  -5 -28 87.7815 80.6211   1
   3  -5  28 114.728 54.3734   2
  -3   5  27 813.606 118.413   3
   3   5 -27 618.857 139.338   5
  -3  -5 -27 505.352 170.794   1
   3  -5  27 513.172 98.7068   2
  -3  -5 -26 308.733 78.9540   3
  -3   5  26 381.354 80.5968   3
   3   5 -26 399.494 110.812   5
  -3  -5 -26 419.121 146.457   1
   3  -5  26 297.133 77.8323   2
  -3  -5 -25 109.598 39.5850   3
  -3   5  25 132.004 53.0552   3
   3   5 -25 116.713 66.1697   5
  -3  -5 -25 220.520 104.869   1
   3  -5  25 175.311 60.5316   2
  -3  -5 -24 263.173 82.2482   3
  -3   5  24 235.069 70.2548   3
   3  -5  24 327.906 80.5079   2
  -3  -5 -24 337.557 140.148   1
   3   5 -24 245.360 87.1777   5
   3  -5  23 2321.71 195.080   2
  -3   5  23 1946.23 189.468   3
  -3  -5 -23 1898.88 292.525   1
   3   5 -23 2360.43 247.688   5
  -3  -5 -23 2300.87 225.687   3
  -3   5  22 366.255 91.0967   3
  -3  -5 -22 428.338 107.817   3
  -3  -5 -22 413.811 148.090   1
   3  -5  22 463.153 95.4492   2
   3   5 -22 523.532 119.999   5
   3  -5  21 2706.27 210.712   2
  -3   5  21 2839.99 231.589   3
  -3  -5 -21 2532.74 320.902   1
   3   5 -21 2962.33 271.828   5
  -3  -5 -21 2832.41 255.928   3
   3  -5  20 1510.82 153.998   2
  -3   5  20 1401.02 166.789   3
  -3  -5 -20 1413.26 235.598   1
   3   5 -20 1510.08 195.028   5
  -3  -5 -20 1594.52 197.881   3
  -3  -5 -19 45.4664 43.0894   3
  -3   5  19 54.5958 54.2643   3
   3   5 -19 4.65951 40.1048   5
   3  -5  19-16.3876 30.9549   2
  -3  -5 -19 33.1814 60.0938   1
  -3  -5 -18 210.979 77.1962   3
  -3   5  18 268.295 81.2499   3
   3  -5  18 149.011 54.9640   2
  -3  -5 -18 119.530 76.9992   1
   3   5 -18 209.298 75.9800   5
   3  -5  17 3466.34 226.121   2
  -3   5  17 3443.46 262.428   3
  -3  -5 -17 3387.73 353.455   1
   3   5 -17 3803.62 303.049   5
  -3  -5 -17 3364.15 296.125   3
  -3   5  16 2570.35 227.099   3
   3  -5  16 2735.56 199.369   2
  -3  -5 -16 3133.10 335.217   1
  -3   5  16 2969.00 204.896   5
   3   5 -16 2790.55 260.814   5
  -3  -5 -16 3255.36 291.629   3
  -3   5  15 5789.98 339.052   3
   3  -5  15 5384.64 282.542   2
  -3  -5 -15 5789.83 450.268   1
   3   5 -15 6213.07 385.623   5
  -3   5  15 5935.53 291.574   5
  -3  -5 -15 6137.35 405.544   3
   3  -5  14 9200.99 362.950   2
  -3   5  14 8584.25 415.457   3
  -3   5  14 9209.31 364.528   5
   3   5 -14 10183.8 488.593   5
  -3  -5 -14 9062.93 496.671   3
   3  -5  13 6370.30 302.145   2
  -3   5  13 5777.72 342.030   3
  -3   5  13 5733.82 292.747   5
   3   5 -13 6716.49 399.237   5
  -3  -5 -13 5950.41 410.177   3
   3  -5  12 4202.09 245.994   2
  -3   5  12 4151.91 290.693   3
  -3   5  12 4417.02 260.220   5
   3   5 -12 4835.92 335.938   5
  -3  -5 -12 4009.45 333.581   3
   3  -5  11 4528.62 256.259   2
  -3   5  11 4537.11 303.319   3
   3   5 -11 5067.40 343.670   5
  -3   5  11 4719.16 270.081   5
  -3   5  11 4465.90 299.333   4
  -3  -5 -11 4734.29 365.335   3
  -3   5  10 324.068 97.4294   3
   3   5 -10 215.763 82.8411   5
  -3   5  10 156.956 49.8593   5
  -3   5  10 175.774 54.7126   4
  -3  -5 -10 209.308 91.2893   3
  -3   5   9 1989.56 201.547   3
  -3  -5  -9 2011.24 250.173   5
   3   5  -9 2193.63 229.820   5
  -3   5   9 2097.63 184.109   5
  -3   5   9 2013.34 199.878   4
  -3  -5  -9 2160.97 255.515   3
  -3   5   8 1221.46 162.270   3
  -3   5   8 1158.45 136.082   5
   3   5  -8 1050.79 160.551   5
  -3  -5  -8 1168.77 188.772   5
  -3   5   8 1028.71 147.416   4
  -3  -5  -8 1232.26 191.221   3
  -3   5   7 276.497 92.0609   3
   3  -5   7 285.379 99.7100   3
  -3   5   7 137.964 56.8886   5
  -3  -5  -7 195.390 71.5365   5
   3   5  -7 102.674 48.5947   5
  -3  -5  -7 138.314 71.1502   3
  -3   5   7 193.388 63.7418   4
   3  -5   6 5951.38 427.601   3
  -3   5   6 5750.01 340.033   3
  -3   5   6 5333.20 303.326   5
   3   5  -6 5821.77 379.869   5
  -3  -5  -6 5697.00 404.998   5
  -3   5   6 5481.52 333.884   4
  -3  -5  -6 5633.23 399.960   3
   3  -5   5 2571.63 287.902   3
  -3   5   5 2684.45 234.865   3
  -3   5   5 2497.08 210.586   5
   3   5  -5 2584.00 253.063   5
  -3  -5  -5 2937.45 287.919   5
  -3   5   5 2672.94 235.522   4
  -3  -5  -5 2922.97 291.323   3
   3  -5   4 4795.93 386.260   3
  -3   5   4 4341.16 298.185   3
   3   5  -4 4668.31 341.156   5
  -3  -5  -4 4772.36 361.107   5
  -3   5   4 4867.24 313.547   4
  -3  -5  -4 4871.08 376.958   3
   3  -5   3 2157.81 265.120   3
  -3   5   3 2040.43 206.482   3
  -3  -5  -3 1870.53 222.597   5
   3   5  -3 2123.95 231.704   5
  -3  -5  -3 2203.98 257.121   3
  -3   5   3 2084.13 207.618   4
   3  -5   2 783.811 169.866   3
  -3   5   2 589.076 109.831   3
  -3  -5  -2 753.082 136.537   5
   3   5  -2 862.665 153.898   5
  -3  -5  -2 741.033 161.055   3
  -3   5   2 720.505 121.503   4
   3  -5   1 378.259 120.109   3
  -3   5   1 233.968 76.0884   3
  -3  -5  -1 293.738 89.6333   5
   3   5  -1 275.523 83.0223   5
  -3   5   1 183.990 55.5007   4
   3  -5   0 26.1345 48.8888   3
  -3   5   0 171.007 68.0492   3
  -3  -5   0 19.0727 26.0826   5
  -3   5   0 22.4998 25.4332   4
   3   5   0 85.2975 54.7490   5
   3  -5  -1 135.458 72.6374   3
  -3   5  -1 210.684 63.9568   3
  -3  -5   1 314.318 99.6435   5
   3   5   1 259.052 92.6721   5
  -3   5  -1 132.183 47.2761   4
   3  -5  -2 720.705 146.692   3
  -3   5  -2 758.183 124.451   3
  -3  -5   2 756.150 140.309   5
   3   5   2 694.140 143.734   5
  -3   5  -2 706.251 125.350   4
  -3   5  -3 1982.10 203.645   3
  -3   5  -3 2060.92 215.181   5
  -3  -5   3 2322.06 237.754   5
   3   5   3 2208.37 250.952   5
   3  -5  -3 2284.23 269.477   3
  -3   5  -3 2197.38 218.511   4
  -3   5  -4 4955.35 312.928   3
  -3  -5   4 4421.21 322.499   5
  -3   5  -4 4519.62 325.215   5
   3   5   4 4843.41 377.420   5
  -3   5  -4 4763.94 318.759   4
   3  -5  -4 4816.26 389.061   3
  -3   5  -5 2592.79 230.123   3
  -3  -5   5 2337.47 234.119   5
   3   5   5 2716.47 293.375   5
  -3   5  -5 2260.28 235.564   5
   3  -5  -5 2989.07 310.253   3
  -3   5  -6 5166.78 318.798   3
  -3  -5   6 5174.55 344.003   5
   3  -5  -6 6137.02 443.253   3
  -3   5  -7 186.551 65.6728   3
   3  -5  -7 122.277 54.7460   3
  -3  -5   7 162.235 62.8306   5
   3  -5  -8 1214.92 196.841   3
  -3   5  -8 1159.56 154.806   3
  -3  -5   8 1092.24 159.013   5
  -3  -5   8 1061.58 162.984   4
  -3   5  -9 1854.35 193.678   3
  -3  -5   9 1837.21 206.316   5
   3  -5  -9 1826.69 244.332   3
  -3  -5   9 1865.99 212.101   4
   3  -5 -10 2.28363 53.9081   3
  -3   5 -10 176.021 77.3267   3
  -3  -5  10 195.430 76.6751   5
  -3  -5  10 89.7424 52.8659   4
  -3   5 -11 5084.39 314.315   3
   3  -5 -11 4607.38 361.833   1
  -3  -5  11 4825.85 332.753   5
  -3  -5  11 4363.79 309.515   4
   3  -5 -11 5397.41 421.869   3
   3  -5 -12 4388.30 266.930   2
   3  -5 -12 4192.12 348.167   1
  -3  -5  12 4610.79 329.004   5
  -3  -5  12 4230.08 301.673   4
   3  -5 -12 4716.59 390.573   3
   3  -5 -13 5755.35 305.822   2
   3  -5 -13 5690.10 410.421   1
  -3  -5  13 6049.27 379.080   5
   3  -5 -13 5474.25 423.470   3
  -3  -5  13 6097.31 359.862   4
   3  -5 -14 9107.77 383.190   2
   3  -5 -14 9266.41 532.097   1
   3   5  14 8334.56 413.308   2
   3  -5 -14 8894.38 532.586   3
  -3  -5  14 9063.85 431.769   4
   3  -5 -14 9901.76 574.180   4
   3  -5 -15 6103.42 310.898   2
   3  -5 -15 6254.51 442.608   1
   3   5  15 5564.42 339.075   2
   3  -5 -15 5748.16 429.234   3
  -3  -5  15 5063.11 322.020   4
   3  -5 -15 6326.14 462.371   4
   3  -5 -16 2762.62 218.783   2
   3  -5 -16 2853.42 305.993   1
   3   5  16 2437.54 223.060   2
  -3  -5  16 2659.50 230.571   4
   3  -5 -16 3098.91 330.771   4
   3  -5 -16 2955.93 310.296   3
   3  -5 -17 3566.20 251.105   2
   3  -5 -17 3311.08 341.923   1
   3   5  17 3237.68 257.249   2
  -3  -5  17 3335.09 254.902   4
   3  -5 -17 3358.34 341.669   4
   3  -5 -17 3228.48 321.445   3
   3  -5 -18 15.3318 50.4816   1
   3   5  18 98.0923 47.1683   2
   3  -5 -18 147.761 82.5059   3
   3  -5 -18 263.129 102.689   4
  -3  -5  18 199.888 71.5188   4
   3  -5 -19 49.6146 42.9312   3
   3   5  19-58.8726 34.2607   2
   3  -5 -19 101.536 92.8063   1
   3  -5 -19-11.4662 21.9033   5
   3  -5 -19-5.15711 63.3536   4
  -3  -5  19 0.55351 36.7060   4
   3  -5 -20 1240.16 196.432   3
   3   5  20 1530.84 181.380   2
   3  -5 -20 1212.89 215.305   1
   3  -5 -20 1309.28 139.018   5
   3  -5 -20 1420.71 236.810   4
   3   5  21 2701.95 238.094   2
   3  -5 -21 3332.17 357.196   1
   3  -5 -21 2997.07 204.209   5
   3  -5 -21 3442.66 366.113   4
   3  -5 -21 2770.35 290.041   3
   3   5  22 354.576 91.8801   2
   3  -5 -22 665.862 170.143   1
   3  -5 -22 269.008 61.1407   5
   3  -5 -22 518.002 161.413   4
   3  -5 -22 428.682 120.871   3
   3  -5 -23 1860.30 278.280   1
   3   5  23 1936.86 205.099   2
   3  -5 -23 1924.69 282.772   4
   3  -5 -23 2213.17 259.086   3
   3  -5 -24 151.045 86.9431   1
   3   5  24 183.232 78.3341   2
   3  -5 -24 203.818 97.1936   4
   3  -5 -24 107.162 82.7902   3
   3   5  25 158.277 63.2945   2
   3  -5 -25 143.020 93.8508   4
   3  -5 -25 113.218 72.7166   3
   3   5  26 468.144 107.293   2
   3  -5 -26 456.508 150.872   4
   3   5  27 744.918 136.133   2
  -3  -5  27 399.982 161.692   3
   3   5  28 146.836 72.9265   2
   3  -5 -28 239.201 125.815   4
  -3  -5  28-64.3232 84.9396   3
   3   5  29 77.7474 56.7631   2
   3  -5 -29 140.601 112.294   4
  -3  -5  29 41.3537 85.6791   3
   3   5  30 342.824 93.1473   2
  -3  -5  30 161.303 109.740   3
   3  -5 -30 305.614 144.928   4
   3   5  31 107.057 60.9223   2
  -3  -5  31 116.341 86.0093   3
   3   5  32 37.4602 67.3184   2
  -3  -5  32 44.6575 83.6592   3
   3  -5 -32 17.8533 122.366   4
   3   5  33 243.929 90.8442   2
  -3  -5  33 327.426 131.423   3
   3  -5 -33 355.156 157.287   4
   3   5  34 100.240 58.2393   2
  -3  -5  34 44.3086 157.257   3
   3  -5 -34 59.2422 99.5039   4
   3   5  35 202.412 90.6855   2
  -3  -5  35 231.487 119.863   3
   3  -5 -35 257.371 172.334   4
   3   5  36 92.9349 75.9970   2
  -3  -5  36 323.560 155.900   3
  -3  -5  37 60.8585 63.5613   3
  -3  -5  38 0.49792 89.3563   3
   3  -6  38 117.839 84.6617   2
   3  -6  37 71.1455 67.7793   2
   3  -6  36-3.54058 35.1936   2
   3  -6  35-23.2686 36.2359   2
   3  -6  34 322.710 95.5435   2
   3  -6  33 67.3042 47.1854   2
  -3  -6 -32 517.959 181.071   1
   3  -6  32 550.948 113.022   2
   3   6 -31 307.579 110.442   5
  -3  -6 -31 408.609 179.246   1
   3  -6  31 383.919 95.7638   2
   3   6 -30 50.7303 54.0522   5
  -3  -6 -30-64.8728 89.5410   1
   3  -6  30 58.0221 50.5945   2
   3   6 -29 111.550 72.3735   5
  -3  -6 -29 50.6586 73.9986   1
   3  -6  29 96.4319 53.7010   2
   3   6 -28 805.739 172.909   5
  -3  -6 -28 687.755 194.678   1
   3  -6  28 625.451 110.190   2
   3   6 -27 449.043 129.287   5
   3  -6  27 366.995 87.2278   2
  -3  -6 -27 349.607 144.591   1
   3   6 -26 142.176 72.1861   5
  -3  -6 -26 308.374 140.748   1
   3  -6  26 278.168 71.5101   2
  -3  -6 -25 192.700 71.1428   3
   3   6 -25 367.237 112.581   5
  -3  -6 -25 125.321 98.3915   1
   3  -6  25 288.471 76.1781   2
  -3  -6 -24 657.097 129.146   3
   3   6 -24 448.524 131.922   5
  -3  -6 -24 341.328 146.364   1
   3  -6  24 359.856 77.3319   2
  -3   6  23 78.3724 45.3042   3
  -3  -6 -23 65.0088 50.9849   3
   3   6 -23 2.49160 61.5470   5
  -3  -6 -23 120.896 83.8518   1
   3  -6  23 78.6814 39.0293   2
  -3  -6 -22 361.295 100.160   3
  -3   6  22 217.211 66.2326   3
   3   6 -22 358.951 103.361   5
   3  -6  22 224.231 62.6789   2
  -3  -6 -22 286.531 127.766   1
  -3  -6 -21 798.473 143.193   3
  -3   6  21 773.456 120.747   3
   3   6 -21 705.620 154.237   5
  -3  -6 -21 822.521 194.267   1
   3  -6  21 636.370 96.7154   2
  -3   6  20 608.757 109.043   3
  -3  -6 -20 689.534 140.370   3
  -3  -6 -20 347.178 125.169   1
   3  -6  20 551.155 89.7797   2
   3   6 -20 581.475 143.464   5
  -3   6  19 86.2504 59.1608   3
  -3  -6 -19 0.44560 61.7915   1
   3  -6  19 151.229 55.7765   2
   3   6 -19 136.201 68.8820   5
  -3  -6 -19 76.0354 46.9128   3
  -3   6  18 2227.94 205.091   3
   3  -6  18 2402.73 180.285   2
  -3  -6 -18 2397.43 320.025   1
   3   6 -18 2683.26 281.270   5
  -3  -6 -18 2562.40 264.587   3
  -3   6  17 643.025 116.784   3
  -3  -6 -17 538.696 142.215   1
   3  -6  17 683.570 98.1848   2
   3   6 -17 585.076 134.676   5
  -3  -6 -17 765.437 150.549   3
  -3   6  16 1525.14 171.129   3
   3  -6  16 1666.09 148.178   2
   3   6 -16 1765.84 226.677   5
  -3  -6 -16 1661.56 220.320   3
  -3   6  15 372.248 93.2051   3
   3  -6  15 414.787 75.7971   2
   3   6 -15 473.582 127.288   5
  -3  -6 -15 407.333 130.084   3
  -3   6  14 4835.53 307.811   3
   3  -6  14 5077.54 256.144   2
   3   6 -14 5393.57 393.029   5
  -3  -6 -14 5152.90 392.655   3
  -3   6  13 366.087 100.298   3
   3  -6  13 217.346 61.6000   2
   3   6 -13 176.930 89.7165   5
  -3  -6 -13 188.648 79.6278   3
  -3   6  12 4989.47 317.305   3
   3  -6  12 4986.82 252.192   2
   3   6 -12 5267.60 389.554   5
  -3  -6 -12 5739.15 422.899   3
  -3   6  11 2093.96 211.674   3
   3  -6  11 1644.99 144.250   2
   3   6 -11 2216.94 250.977   5
  -3  -6 -11 2141.55 259.143   3
  -3   6  10 2691.72 234.213   3
   3  -6  10 2407.43 177.377   2
   3   6 -10 2541.96 272.164   5
  -3  -6 -10 2717.39 290.075   3
   3  -6   9 2980.03 200.294   2
  -3   6   9 3324.52 264.618   3
   3   6  -9 3615.95 323.067   5
  -3  -6  -9 3665.52 340.580   3
  -3   6   8 3158.65 253.169   3
   3   6  -8 3252.61 312.517   5
  -3   6   8 2960.43 237.261   4
  -3  -6  -8 3299.40 323.700   3
  -3   6   7 3539.32 268.222   3
   3   6  -7 4063.03 342.043   5
  -3   6   7 3229.65 249.288   4
  -3  -6  -7 3558.08 334.548   3
  -3   6   6 781.762 130.920   3
   3   6  -6 806.719 166.223   5
  -3   6   6 546.991 106.370   4
  -3   6   5 127.798 54.1570   3
   3   6  -5 149.213 72.0261   5
  -3   6   5 116.946 54.7101   4
  -3   6   4 441.406 99.3876   3
   3   6  -4 303.326 97.9000   5
  -3   6   4 358.845 85.6264   4
  -3   6   3 2734.57 2421.99   3
  -3   6   3 2575.66 2470.53   5
   3   6  -3 3005.87 3098.21   5
  -3   6   3 2000.94 1977.28   4
  -3   6   2 2212.84 212.308   3
  -3   6   2 2213.77 224.957   5
  -3  -6  -2 2240.64 257.490   5
   3   6  -2 2253.74 258.538   5
  -3   6   2 2277.95 212.710   4
  -3   6   1 156.931 73.6392   3
  -3  -6  -1-62.1139 71.2145   5
  -3   6   1 35.2597 43.6051   5
   3   6  -1 23.4672 55.3457   5
  -3   6   1 18.3730 32.9346   4
  -3   6   0 988.836 144.065   3
  -3  -6   0 1442.24 203.564   5
  -3   6   0 1158.04 165.532   5
   3   6   0 1444.02 211.853   5
  -3   6   0 1099.90 148.100   4
  -3   6  -1 62.6897 61.5069   3
  -3  -6   1 39.2267 47.5119   5
  -3   6  -1 70.7512 54.2816   5
   3   6   1-15.6591 56.9750   5
  -3   6  -1 62.8251 44.8256   4
  -3   6  -2 2042.42 202.494   3
   3   6   2 2412.45 275.339   5
  -3   6  -2 2046.86 228.502   5
  -3  -6   2 2032.23 246.012   5
  -3   6  -2 2144.76 205.023   4
  -3   6  -3 2661.50 2431.54   3
  -3   6  -3 2665.53 2696.46   5
   3   6   3 2930.77 3275.97   5
  -3  -6   3 1547.73 2135.94   5
  -3   6  -3 1959.61 1986.36   4
  -3   6  -4 385.377 102.811   5
  -3  -6   4 508.825 122.644   5
  -3   6  -4 382.272 87.5663   4
   3   6   4 466.307 138.156   5
  -3   6  -5 144.991 66.3177   5
  -3  -6   5 171.149 68.5678   5
   3   6   5 138.985 88.0967   5
  -3   6  -5 285.288 74.0180   4
  -3   6  -6 820.618 156.694   5
  -3  -6   6 664.330 139.057   5
  -3   6  -6 654.269 119.722   4
   3   6   6 827.260 183.526   5
  -3   6  -7 3368.46 314.957   5
  -3  -6   7 3804.30 323.121   5
   3   6   7 4019.70 379.371   5
  -3   6  -7 3446.56 266.211   4
  -3  -6   7 2700.40 255.374   4
  -3   6  -8 3183.85 307.883   5
  -3  -6   8 3185.27 295.860   5
   3   6   8 3663.45 368.167   5
  -3  -6   8 3098.33 270.851   4
   3  -6  -9 3043.49 206.301   2
  -3  -6   9 2894.89 283.782   5
  -3   6  -9 3618.09 337.570   5
  -3  -6   9 2604.28 242.216   4
   3  -6  -9 3332.31 345.047   3
   3  -6 -10 2714.27 193.905   2
  -3  -6  10 2308.86 252.511   5
  -3   6 -10 2576.83 293.136   5
   3  -6 -10 2963.25 323.611   3
  -3  -6  10 2288.38 224.277   4
   3  -6 -11 1990.96 170.236   2
  -3  -6  11 1743.59 219.898   5
  -3   6 -11 1708.13 247.109   5
  -3  -6  11 1601.60 186.640   4
   3  -6 -11 2114.12 269.265   3
   3   6  12 4676.27 312.133   2
   3  -6 -12 4844.21 262.051   2
  -3  -6  12 4433.90 354.596   5
  -3  -6  12 4444.30 304.169   4
   3  -6 -12 4798.23 414.470   3
   3  -6 -13 341.282 123.979   3
   3   6  13 199.019 70.1842   2
   3  -6 -13 246.628 81.1455   2
  -3  -6  13 269.703 93.5710   5
  -3  -6  13 102.558 41.3260   4
   3  -6 -14 4365.28 256.839   2
   3  -6 -14 5336.91 438.957   1
   3   6  14 4061.62 288.155   2
  -3  -6  14 4812.90 306.081   4
   3  -6 -14 5372.40 434.688   4
   3  -6 -14 5001.30 418.134   3
   3  -6 -15 298.619 67.2054   2
   3  -6 -15 434.869 149.608   1
   3   6  15 445.239 105.985   2
   3  -6 -15 505.492 141.655   3
   3  -6 -15 536.877 151.218   4
  -3  -6  15 387.540 91.3925   4
   3  -6 -16 1628.58 161.468   2
   3  -6 -16 1772.54 257.577   1
   3   6  16 1656.93 183.891   2
   3  -6 -16 1592.69 244.065   4
  -3  -6  16 1703.84 177.205   4
   3  -6 -16 1837.31 252.594   3
   3  -6 -17 577.339 95.2817   2
   3   6  17 559.180 109.674   2
   3  -6 -17 694.519 167.697   1
   3  -6 -17 559.479 144.148   3
   3  -6 -17 772.138 182.903   4
  -3  -6  17 740.383 117.130   4
   3   6  18 2140.21 211.553   2
   3  -6 -18 1956.22 293.583   1
   3  -6 -18 2358.22 208.247   5
   3  -6 -18 2158.52 267.847   3
  -3  -6  18 2329.17 200.314   4
   3  -6 -18 2487.02 306.415   4
   3  -6 -19 46.8081 65.1602   3
   3   6  19 226.078 76.4000   2
   3  -6 -19 74.6301 67.8538   1
   3  -6 -19 165.331 70.5841   5
   3  -6 -19 59.5640 50.6738   4
   3  -6 -20 771.658 163.683   3
   3  -6 -20 447.389 148.642   1
   3   6  20 547.003 113.234   2
   3  -6 -20 808.169 128.576   5
   3  -6 -20 817.975 175.706   4
   3  -6 -21 570.180 163.373   1
   3   6  21 603.398 116.983   2
   3  -6 -21 744.521 157.610   3
   3  -6 -21 658.184 151.245   4
   3   6  22 369.367 87.2578   2
   3  -6 -22 193.425 88.6372   1
   3  -6 -22 363.322 111.398   3
   3  -6 -22 417.059 140.980   4
   3   6  23 10.6244 52.8896   2
   3  -6 -23 62.9280 77.4242   1
   3  -6 -23 154.231 89.5734   4
   3  -6 -24 467.789 152.480   1
   3   6  24 310.086 83.9140   2
   3  -6 -24 509.127 156.673   4
   3   6  25 254.752 78.1923   2
   3  -6 -25 306.353 134.037   1
   3  -6 -25 138.461 82.9869   4
   3  -6 -26 342.547 152.375   1
   3   6  26 259.125 91.6052   2
   3  -6 -26 277.721 134.278   4
   3  -6 -27 428.234 155.430   1
   3   6  27 439.601 104.558   2
   3  -6 -27 820.445 199.938   4
   3  -6 -28 879.970 223.216   1
   3   6  28 688.275 131.273   2
   3  -6 -28 1139.57 244.908   4
   3   6  29 245.634 85.7323   2
   3  -6 -29-33.7558 56.7960   4
   3   6  30 56.2733 57.2121   2
   3  -6 -30-62.9647 65.4703   4
   3   6  31 355.098 99.7404   2
   3  -6 -31 387.674 145.622   4
   3   6  32 606.156 137.300   2
  -3  -6  32 445.011 163.262   3
   3  -6 -32 938.679 253.792   4
   3   6  33-18.2085 32.7978   2
  -3  -6  33 97.9121 115.758   3
   3  -6 -33 234.529 137.799   4
   3   6  34 504.112 126.879   2
  -3  -6  34 208.813 140.530   3
   3  -6 -34 499.248 199.470   4
   3   6  35 48.6206 58.4938   2
  -3  -6  35-53.9379 77.5480   3
  -3  -6  36 54.4960 107.181   3
  -3  -6  37 220.296 147.868   3
  -3  -6  38 19.6218 86.1034   3
  -3  -7 -33 397.353 182.975   1
   3  -7  32 31.1835 34.8619   2
  -3  -7 -32 63.6010 130.157   1
   3   7 -31 165.616 111.344   5
   3  -7  31 156.432 57.1483   2
  -3  -7 -31 76.3847 152.487   1
   3   7 -30 250.158 113.740   5
   3  -7  30 126.851 59.7151   2
  -3  -7 -30 191.305 125.128   1
   3   7 -29 117.085 80.3677   5
  -3  -7 -29 8.01710 70.1220   1
   3  -7  29-7.04947 26.7500   2
   3   7 -28 194.433 102.208   5
  -3  -7 -28 19.3977 76.2689   1
   3  -7  28 229.119 67.6110   2
   3   7 -27 585.503 169.724   5
  -3  -7 -27 653.018 217.217   1
   3  -7  27 533.759 99.6111   2
   3   7 -26 617.770 160.232   5
  -3  -7 -26 371.326 150.677   1
   3  -7  26 539.253 96.8126   2
   3   7 -25 829.007 176.868   5
  -3  -7 -25 909.771 233.430   1
   3  -7  25 655.827 103.128   2
  -3  -7 -24 31.3764 46.0540   3
   3   7 -24 29.5035 62.9575   5
  -3  -7 -24-64.1250 65.7664   1
   3  -7  24 56.1883 34.0464   2
  -3  -7 -23 11.1499 31.8584   3
  -3  -7 -23 21.8074 56.4499   1
   3  -7  23-13.9438 24.4458   2
   3   7 -23-7.65322 69.9486   5
  -3  -7 -22-24.1056 62.0605   1
   3  -7  22 0.84064 21.5446   2
   3   7 -22-85.3667 80.9299   5
  -3  -7 -22 55.4638 57.8580   3
  -3  -7 -21 303.025 115.466   1
   3  -7  21 398.531 73.5373   2
   3   7 -21 344.466 112.754   5
  -3  -7 -21 436.689 113.080   3
  -3  -7 -20 546.277 175.799   1
   3  -7  20 504.272 81.0842   2
   3   7 -20 580.518 150.710   5
  -3  -7 -20 525.832 127.648   3
  -3  -7 -19 138.736 91.7259   1
   3  -7  19 172.717 47.8374   2
   3   7 -19 78.0014 60.5179   5
  -3   7  19 82.9053 27.9610   5
  -3  -7 -19 136.660 82.0317   3
  -3  -7 -18 351.143 124.259   1
   3  -7  18 339.945 67.5182   2
   3   7 -18 491.160 139.143   5
  -3   7  18 332.291 93.0503   5
  -3  -7 -18 405.356 117.034   3
   3  -7  17 603.893 85.8768   2
   3   7 -17 528.451 139.932   5
  -3  -7 -17 393.366 120.309   3
  -3   7  17 529.675 112.918   5
   3  -7  16 35.8329 32.6140   2
   3   7 -16 84.4529 64.1116   5
  -3   7  16 51.9621 49.0037   5
  -3  -7 -16 84.6676 58.1875   3
   3  -7  15 905.489 100.671   2
   3   7 -15 802.819 165.082   5
  -3   7  15 844.025 141.836   5
  -3  -7 -15 953.026 179.593   3
   3  -7  14 468.865 71.2892   2
   3   7 -14 484.439 137.921   5
  -3   7  14 616.285 124.404   5
  -3  -7 -14 535.001 146.915   3
   3  -7  13 369.968 63.5660   2
  -3   7  13 427.393 103.501   5
   3   7 -13 381.013 118.852   5
  -3  -7 -13 529.192 136.547   3
   3  -7  12 143.431 42.3922   2
   3   7 -12 147.475 81.7998   5
  -3   7  12 187.487 68.7803   5
  -3  -7 -12 252.860 109.307   3
   3  -7  11 481.742 74.0982   2
  -3   7  11 614.848 125.872   5
   3   7 -11 389.735 125.419   5
  -3  -7 -11 617.473 146.050   3
   3  -7  10 1268.81 114.242   2
  -3   7  10 1267.67 179.077   5
   3   7 -10 1412.89 218.533   5
   3  -7   9 3002.59 178.582   2
   3   7  -9 3370.92 335.193   5
  -3   7   9 3158.08 282.719   5
   3  -7   8 354.669 64.3625   2
   3   7  -8 293.146 92.0339   5
  -3   7   8 239.887 77.5894   5
   3  -7   7 467.686 72.0021   2
   3   7  -7 341.813 106.754   5
  -3   7   7 550.810 119.049   5
  -3   7   6 692.090 140.515   5
   3   7  -6 787.577 158.752   5
  -3   7   5 75.7945 54.4929   5
   3   7  -5 56.6541 56.6264   5
  -3   7   5 172.014 56.5429   4
  -3   7   4-2.12661 39.6043   5
   3   7  -4 41.3092 56.5406   5
  -3   7   4 117.368 50.6302   4
  -3   7   3 475.864 112.502   5
   3   7  -3 514.250 142.931   5
  -3   7   3 545.416 103.749   4
  -3   7   2 1365.81 194.003   5
   3   7  -2 1309.37 219.672   5
  -3   7   2 1488.56 163.556   4
   3   7  -1 69.3338 67.9043   5
  -3   7   1-6.30573 39.3452   5
  -3   7   1-0.18062 24.7063   4
  -3   7   0 1439.03 199.874   5
  -3   7   0 1391.02 158.406   4
   3   7   0 1601.92 235.683   5
  -3   7  -1-25.3481 40.2190   5
  -3   7  -1-9.40256 39.4349   4
   3   7   1 23.4461 82.1686   5
  -3   7  -2 1158.76 182.314   5
   3   7   2 1451.76 226.784   5
  -3   7  -2 1249.77 151.805   4
  -3   7  -3 269.840 86.4950   5
   3   7   3 639.727 147.226   5
  -3   7  -3 376.829 80.6180   4
  -3   7  -4 33.0069 45.3623   5
   3   7   4 41.4376 60.6929   5
  -3   7  -4 0.92227 28.6942   4
  -3   7  -5 136.638 59.9062   5
   3   7   5 202.838 97.1639   5
  -3   7  -5 123.785 45.1539   4
   3  -7  -6 599.907 80.6117   2
  -3   7  -6 789.725 156.674   5
   3   7   6 843.335 188.410   5
  -3   7  -6 663.602 110.486   4
   3  -7  -7 485.169 75.8250   2
  -3   7  -7 447.728 133.770   5
  -3   7  -7 384.828 86.2379   4
   3   7   7 406.354 129.252   5
  -3  -7   7 459.546 107.785   4
   3  -7  -8 249.501 61.7868   2
  -3   7  -8 359.181 116.127   5
   3   7   8 341.501 139.743   5
  -3  -7   8 178.831 63.3632   4
  -3   7  -8 358.516 78.8777   4
   3  -7  -9 2947.93 191.131   2
  -3   7  -9 3121.61 325.363   5
   3   7   9 3588.83 392.772   5
  -3  -7   9 2898.98 248.206   4
  -3   7  -9 2749.87 232.181   4
   3  -7 -10 1262.77 124.935   2
  -3   7 -10 1147.21 204.728   5
  -3   7 -10 1005.54 144.170   4
  -3  -7  10 1168.78 155.698   4
   3  -7 -11 633.279 90.2670   2
   3   7  11 395.430 88.7395   2
  -3   7 -11 368.807 134.030   5
  -3   7 -11 521.956 105.133   4
  -3  -7  11 417.361 89.0411   4
   3  -7 -12 197.093 53.4948   2
   3   7  12 81.8686 32.2875   2
  -3   7 -12 149.579 88.9738   5
  -3  -7  12 144.656 62.5483   4
   3  -7 -13 456.608 77.2125   2
   3   7  13 368.216 85.7529   2
  -3   7 -13 496.599 144.207   5
  -3  -7  13 320.536 82.6864   4
   3  -7 -14 482.405 80.6690   2
   3   7  14 389.907 88.8682   2
  -3   7 -14 504.682 150.167   5
  -3  -7  14 436.433 90.9982   4
   3  -7 -15 736.990 172.643   1
   3  -7 -15 765.963 102.867   2
   3   7  15 734.074 123.054   2
  -3   7 -15 1151.41 213.371   5
   3  -7 -15 963.368 191.729   4
  -3  -7  15 793.026 116.939   4
   3  -7 -16 9.50570 22.2898   2
   3  -7 -16-50.1968 67.4744   1
   3   7  16 54.8660 42.0388   2
  -3   7 -16 26.9327 46.2390   5
   3  -7 -16-56.4283 74.7149   4
  -3  -7  16-23.0607 28.3559   4
   3  -7 -17 614.181 170.577   1
   3   7  17 521.763 107.624   2
   3  -7 -17 512.554 93.0192   2
  -3   7 -17 591.944 155.709   5
   3  -7 -17 638.454 175.885   4
  -3  -7  17 635.218 102.559   4
   3  -7 -18 325.539 119.929   1
   3   7  18 378.348 94.0579   2
  -3   7 -18 603.382 165.379   5
   3  -7 -18 424.341 131.103   4
   3   7  19-23.8985 44.1818   2
   3  -7 -19 142.347 89.4185   1
   3  -7 -19 168.546 85.6126   4
   3   7  20 493.022 102.412   2
   3  -7 -20 394.719 144.398   1
   3  -7 -20 530.339 147.287   4
   3   7  21 437.140 106.210   2
   3  -7 -21 376.426 147.051   1
   3  -7 -21 375.984 125.407   4
   3  -7 -22-20.2750 69.5122   1
   3   7  22 52.9010 50.7209   2
   3  -7 -22 5.14958 51.0486   4
   3  -7 -23 166.100 63.2131   1
   3   7  23-15.1548 46.6461   2
   3  -7 -23 98.1057 65.8330   4
   3  -7 -24 83.5273 100.888   1
   3   7  24 29.0320 39.5980   2
   3  -7 -24-20.3558 56.9152   4
   3   7  25 790.391 136.346   2
   3  -7 -25 732.535 204.934   1
   3  -7 -25 833.978 194.671   4
   3  -7 -26 506.263 171.565   1
   3   7  26 476.292 114.098   2
   3  -7 -26 492.845 169.382   4
   3  -7 -27 560.921 191.666   1
   3   7  27 585.508 116.341   2
   3  -7 -27 517.286 165.907   4
   3   7  28 172.140 68.9167   2
   3  -7 -28 6.17584 73.2492   1
   3  -7 -28 225.488 120.256   4
   3  -7 -29 269.871 153.685   1
   3  -7 -29 285.741 133.896   4
   3  -7 -30 115.581 119.412   1
   3   7  30 91.0514 61.9050   2
   3  -7 -30 22.5499 64.5756   4
   3   7  31 76.9832 61.6874   2
   3  -7 -31-15.9318 88.3243   4
   3   7  32-20.2270 43.9625   2
   3  -7 -32-9.25740 91.4852   4
   3   7  33 394.432 112.125   2
  -3  -7  35 134.643 137.521   3
  -3  -7  36 92.3524 82.5448   3
  -3  -7  37 28.9065 102.488   3
  -3  -8 -31 12.7402 78.7785   1
  -3  -8 -30 29.8180 116.511   1
[truncated: 166,698 more chars]
