# Supplementary material
Source: MDPI journal article supplement (https://www.mdpi.com/2073-4352/13/8/1239)
Supplement: s1 [file s1 › SF2_CIF of 5b & 6.cif]

 
data_bmk2128
 
_audit_creation_method            'SHELXL-2018/1'
_shelx_SHELXL_version_number      '2018/1'
_chemical_name_systematic         ?
_chemical_name_common             ?
_chemical_melting_point           ?
_chemical_formula_moiety          ?
_chemical_formula_sum
 'C23 H15 F N2 O S' 
_chemical_formula_weight          386.43

loop_
 _atom_type_symbol
 _atom_type_description
 _atom_type_scat_dispersion_real
 _atom_type_scat_dispersion_imag
 _atom_type_scat_source
 'C'  'C'   0.0033   0.0016
 'International Tables Vol C Tables 4.2.6.8 and 6.1.1.4'
 'H'  'H'   0.0000   0.0000
 'International Tables Vol C Tables 4.2.6.8 and 6.1.1.4'
 'N'  'N'   0.0061   0.0033
 'International Tables Vol C Tables 4.2.6.8 and 6.1.1.4'
 'O'  'O'   0.0106   0.0060
 'International Tables Vol C Tables 4.2.6.8 and 6.1.1.4'
 'S'  'S'   0.1246   0.1234
 'International Tables Vol C Tables 4.2.6.8 and 6.1.1.4'
 'F'  'F'   0.0171   0.0103
 'International Tables Vol C Tables 4.2.6.8 and 6.1.1.4'
 
_space_group_crystal_system       monoclinic
_space_group_IT_number            14
_space_group_name_H-M_alt         'P 21/c'
_space_group_name_Hall            '-P 2ybc'
 
_shelx_space_group_comment
;
The symmetry employed for this shelxl refinement is uniquely defined
by the following loop, which should always be used as a source of
symmetry information in preference to the above space-group names.
They are only intended as comments.
;
 
loop_
 _space_group_symop_operation_xyz
 'x, y, z'
 '-x, y+1/2, -z+1/2'
 '-x, -y, -z'
 'x, -y-1/2, z-1/2'
 
_cell_length_a                    10.6289(9)
_cell_length_b                    5.6010(3)
_cell_length_c                    30.567(2)
_cell_angle_alpha                 90
_cell_angle_beta                  95.645(7)
_cell_angle_gamma                 90
_cell_volume                      1810.9(2)
_cell_formula_units_Z             4
_cell_measurement_temperature     293(2)
_cell_measurement_reflns_used   3132
_cell_measurement_theta_min     3.8260
_cell_measurement_theta_max     22.8220
 
_exptl_crystal_description        needle
_exptl_crystal_colour             colourless
_exptl_crystal_density_meas       ?
_exptl_crystal_density_method     ?
_exptl_crystal_density_diffrn     1.417          
_exptl_crystal_F_000              800
_exptl_transmission_factor_min    ?
_exptl_transmission_factor_max    ?
_exptl_crystal_size_max           0.550
_exptl_crystal_size_mid           0.130
_exptl_crystal_size_min           0.070
_exptl_absorpt_coefficient_mu     0.205
_shelx_estimated_absorpt_T_min    0.895
_shelx_estimated_absorpt_T_max    0.986
_exptl_absorpt_correction_T_min                     0.700
_exptl_absorpt_correction_T_max                     1.000
_exptl_absorpt_correction_type            gaussian
_exptl_absorpt_process_details
;
CrysAlisPro 1.171.41.112a (Rigaku Oxford Diffraction, 2021)
Numerical absorption correction based on gaussian integration over
a multifaceted crystal model
Empirical absorption correction using spherical harmonics,
implemented in SCALE3 ABSPACK scaling algorithm.
;
_diffrn_ambient_temperature       293(2)
_diffrn_radiation_wavelength      0.71073
_diffrn_radiation_type            MoK\a
_diffrn_source                    ?
_diffrn_measurement_device_type 'SuperNova, Dual, Cu at home/near, Atlas'
_diffrn_measurement_method '\w scans'
_diffrn_detector_area_resol_mean  ?
_diffrn_reflns_number             15447
_diffrn_reflns_av_unetI/netI      0.0787
_diffrn_reflns_av_R_equivalents   0.0539
_diffrn_reflns_limit_h_min        -13
_diffrn_reflns_limit_h_max        14
_diffrn_reflns_limit_k_min        -7
_diffrn_reflns_limit_k_max        7
_diffrn_reflns_limit_l_min        -31
_diffrn_reflns_limit_l_max        39
_diffrn_reflns_theta_min          3.450
_diffrn_reflns_theta_max          29.939
_diffrn_reflns_theta_full         25.242
_diffrn_measured_fraction_theta_max   0.885
_diffrn_measured_fraction_theta_full  0.998
_diffrn_reflns_Laue_measured_fraction_max    0.885
_diffrn_reflns_Laue_measured_fraction_full   0.998
_diffrn_reflns_point_group_measured_fraction_max   0.885
_diffrn_reflns_point_group_measured_fraction_full  0.998
_reflns_number_total              4636
_reflns_number_gt                 2364
_reflns_threshold_expression      'I > 2\s(I)'
_reflns_Friedel_coverage          0.000
_reflns_Friedel_fraction_max      .
_reflns_Friedel_fraction_full     .
 
_reflns_special_details
;
 Reflections were merged by SHELXL according to the crystal
 class for the calculation of statistics and refinement.
 
 _reflns_Friedel_fraction is defined as the number of unique
 Friedel pairs measured divided by the number that would be
 possible theoretically, ignoring centric projections and
 systematic absences.
;
 
_computing_data_collection     'CrysAlisPro 1.171.41.112a (Rigaku OD, 2021)'
_computing_cell_refinement     'CrysAlisPro 1.171.41.112a (Rigaku OD, 2021)'
_computing_data_reduction      'CrysAlisPro 1.171.41.112a (Rigaku OD, 2021)'
_computing_structure_solution   'SHELXT'
_computing_structure_refinement 'SHELXL-2018/1 (Sheldrick, 2018)'
_computing_molecular_graphics     ?
_computing_publication_material   ?
_refine_special_details           ?
_refine_ls_structure_factor_coef  Fsqd
_refine_ls_matrix_type            full
_refine_ls_weighting_scheme       calc
_refine_ls_weighting_details
'w=1/[\s^2^(Fo^2^)+(0.0334P)^2^+0.6004P] where P=(Fo^2^+2Fc^2^)/3'
_atom_sites_solution_primary      ?
_atom_sites_solution_secondary    ?
_atom_sites_solution_hydrogens    geom
_refine_ls_hydrogen_treatment     constr
_refine_ls_extinction_method      'SHELXL-2018/1 (Sheldrick 2018)'
_refine_ls_extinction_coef        0.0035(7)
_refine_ls_extinction_expression
 'Fc^*^=kFc[1+0.001xFc^2^\l^3^/sin(2\q)]^-1/4^'
_refine_ls_number_reflns          4636
_refine_ls_number_parameters      264
_refine_ls_number_restraints      0
_refine_ls_R_factor_all           0.1354
_refine_ls_R_factor_gt            0.0584
_refine_ls_wR_factor_ref          0.1410
_refine_ls_wR_factor_gt           0.1076
_refine_ls_goodness_of_fit_ref    1.059
_refine_ls_restrained_S_all       1.059
_refine_ls_shift/su_max           0.000
_refine_ls_shift/su_mean          0.000
 
loop_
 _atom_site_label
 _atom_site_type_symbol
 _atom_site_fract_x
 _atom_site_fract_y
 _atom_site_fract_z
 _atom_site_U_iso_or_equiv
 _atom_site_adp_type
 _atom_site_occupancy
 _atom_site_site_symmetry_order  
 _atom_site_calc_flag
 _atom_site_refinement_flags_posn
 _atom_site_refinement_flags_adp
 _atom_site_refinement_flags_occupancy
 _atom_site_disorder_assembly
 _atom_site_disorder_group
C1 C 0.2464(3) 0.0517(5) 0.28754(9) 0.0489(7) Uani 1 1 d . . . . .
C2 C 0.2173(3) -0.1238(5) 0.25636(10) 0.0624(8) Uani 1 1 d . . . . .
H2 H 0.261411 -0.139850 0.231724 0.075 Uiso 1 1 calc R U . . .
C3 C 0.1187(3) -0.2736(5) 0.26405(11) 0.0654(9) Uani 1 1 d . . . . .
H3 H 0.095374 -0.394346 0.243997 0.079 Uiso 1 1 calc R U . . .
C4 C 0.0539(3) -0.2486(5) 0.30074(11) 0.0670(9) Uani 1 1 d . . . . .
H4 H -0.011718 -0.353465 0.304885 0.080 Uiso 1 1 calc R U . . .
C5 C 0.0839(3) -0.0732(5) 0.33122(10) 0.0627(8) Uani 1 1 d . . . . .
H5 H 0.039388 -0.057551 0.355771 0.075 Uiso 1 1 calc R U . . .
C6 C 0.1831(3) 0.0813(5) 0.32441(9) 0.0481(7) Uani 1 1 d . . . . .
C7 C 0.2460(3) 0.2741(5) 0.34831(9) 0.0509(7) Uani 1 1 d . . . . .
H7 H 0.224923 0.337631 0.374737 0.061 Uiso 1 1 calc R U . . .
C8 C 0.3408(3) 0.3464(4) 0.32564(8) 0.0438(6) Uani 1 1 d . . . . .
C9 C 0.4398(3) 0.5249(4) 0.33071(8) 0.0434(6) Uani 1 1 d . . . . .
C10 C 0.5092(3) 0.5978(5) 0.29887(9) 0.0526(7) Uani 1 1 d . . . . .
H10 H 0.498008 0.540861 0.270177 0.063 Uiso 1 1 calc R U . . .
C11 C 0.5779(3) 0.7889(4) 0.37100(9) 0.0447(6) Uani 1 1 d . . . . .
C12 C 0.4174(3) 0.5940(4) 0.41119(8) 0.0427(6) Uani 1 1 d . . . . .
C13 C 0.4434(3) 0.3896(5) 0.43531(9) 0.0500(7) Uani 1 1 d . . . . .
H13 H 0.500726 0.278407 0.426473 0.060 Uiso 1 1 calc R U . . .
C14 C 0.3836(3) 0.3512(5) 0.47277(9) 0.0567(8) Uani 1 1 d . . . . .
H14 H 0.399622 0.212796 0.489176 0.068 Uiso 1 1 calc R U . A 1
C15 C 0.3009(3) 0.5172(6) 0.48560(11) 0.0634(9) Uani 1 1 d . . . B 1
H15B H 0.260965 0.490904 0.510909 0.076 Uiso 0.668(4) 1 calc R U P C 1
C16 C 0.2756(3) 0.7224(5) 0.46183(11) 0.0641(9) Uani 1 1 d . . . . .
H16 H 0.219130 0.834483 0.470926 0.077 Uiso 1 1 calc R U . B 1
C17 C 0.3349(3) 0.7605(5) 0.42436(10) 0.0536(7) Uani 1 1 d . . . . .
H17 H 0.318793 0.899185 0.408032 0.064 Uiso 1 1 calc R U . . .
C18 C 0.7358(3) 1.0350(4) 0.40546(9) 0.0468(7) Uani 1 1 d . . . . .
C19 C 0.8388(3) 0.9978(5) 0.43612(10) 0.0595(8) Uani 1 1 d . . . . .
H19 H 0.839128 0.867498 0.455005 0.071 Uiso 1 1 calc R U . . .
C20 C 0.9402(3) 1.1502(6) 0.43905(11) 0.0677(9) Uani 1 1 d . . . . .
H20 H 1.009304 1.123100 0.459578 0.081 Uiso 1 1 calc R U . D 1
C21 C 0.9387(3) 1.3419(6) 0.41156(12) 0.0652(9) Uani 1 1 d . . . E 1
H21 H 1.007185 1.446009 0.413737 0.078 Uiso 0.332(4) 1 calc R U P C 1
C22 C 0.8400(3) 1.3842(5) 0.38119(11) 0.0626(8) Uani 1 1 d . . . . .
H22 H 0.840960 1.515334 0.362561 0.075 Uiso 1 1 calc R U . E 1
C23 C 0.7381(3) 1.2315(5) 0.37807(10) 0.0544(7) Uani 1 1 d . . . . .
H23 H 0.669925 1.260648 0.357299 0.065 Uiso 1 1 calc R U . . .
N1 N 0.4753(2) 0.6363(4) 0.37117(7) 0.0447(5) Uani 1 1 d . . . . .
N2 N 0.6311(2) 0.8820(4) 0.40621(7) 0.0489(6) Uani 1 1 d . . . . .
O1 O 0.34379(18) 0.2133(3) 0.28744(6) 0.0525(5) Uani 1 1 d . . . . .
S1 S 0.62129(8) 0.80817(13) 0.31663(2) 0.0550(2) Uani 1 1 d . . . . .
F1 F 0.2358(6) 0.4846(9) 0.51715(18) 0.088(2) Uani 0.332(4) 1 d . . P C 2
F2 F 1.0348(3) 1.4920(5) 0.41442(11) 0.0918(13) Uani 0.668(4) 1 d . . P C 2
 
loop_
 _atom_site_aniso_label
 _atom_site_aniso_U_11
 _atom_site_aniso_U_22
 _atom_site_aniso_U_33
 _atom_site_aniso_U_23
 _atom_site_aniso_U_13
 _atom_site_aniso_U_12
C1 0.0562(18) 0.0465(15) 0.0420(16) 0.0005(12) -0.0051(14) -0.0008(13)
C2 0.076(2) 0.0616(19) 0.0476(18) -0.0104(15) -0.0048(16) -0.0021(17)
C3 0.078(2) 0.0534(18) 0.061(2) -0.0083(15) -0.0125(18) -0.0110(16)
C4 0.070(2) 0.061(2) 0.067(2) 0.0054(17) -0.0067(18) -0.0148(16)
C5 0.066(2) 0.0655(19) 0.0561(19) 0.0037(16) 0.0008(16) -0.0090(16)
C6 0.0545(18) 0.0462(15) 0.0422(16) 0.0025(13) -0.0028(13) 0.0017(13)
C7 0.0583(19) 0.0552(16) 0.0393(15) -0.0033(13) 0.0052(14) 0.0005(14)
C8 0.0546(18) 0.0464(15) 0.0294(13) -0.0020(12) -0.0013(12) 0.0038(13)
C9 0.0515(17) 0.0440(14) 0.0339(14) -0.0017(12) 0.0000(12) 0.0030(12)
C10 0.066(2) 0.0550(16) 0.0369(15) -0.0002(13) 0.0035(14) -0.0053(14)
C11 0.0514(17) 0.0419(14) 0.0414(15) 0.0009(12) 0.0080(13) 0.0002(12)
C12 0.0513(17) 0.0428(14) 0.0336(14) -0.0042(12) 0.0023(12) -0.0051(12)
C13 0.0603(19) 0.0441(15) 0.0456(16) -0.0020(13) 0.0044(14) 0.0049(13)
C14 0.073(2) 0.0502(17) 0.0467(17) 0.0097(14) 0.0052(15) -0.0084(15)
C15 0.070(2) 0.067(2) 0.057(2) -0.0055(17) 0.0215(18) -0.0147(17)
C16 0.069(2) 0.0585(19) 0.069(2) -0.0057(17) 0.0276(18) 0.0039(16)
C17 0.062(2) 0.0457(16) 0.0540(18) -0.0002(13) 0.0111(15) 0.0021(14)
C18 0.0536(18) 0.0453(15) 0.0424(16) -0.0057(12) 0.0096(13) -0.0017(13)
C19 0.071(2) 0.0552(17) 0.0518(18) 0.0039(14) 0.0032(16) -0.0059(16)
C20 0.054(2) 0.075(2) 0.072(2) -0.0003(18) -0.0037(17) -0.0048(17)
C21 0.055(2) 0.066(2) 0.077(2) -0.0081(18) 0.0185(18) -0.0135(17)
C22 0.065(2) 0.0537(17) 0.071(2) 0.0102(16) 0.0155(18) -0.0048(16)
C23 0.0525(19) 0.0526(17) 0.0581(19) 0.0067(14) 0.0057(14) -0.0026(14)
N1 0.0550(15) 0.0457(12) 0.0340(12) -0.0028(10) 0.0080(10) -0.0034(11)
N2 0.0565(15) 0.0500(13) 0.0406(13) -0.0036(11) 0.0070(11) -0.0103(11)
O1 0.0612(13) 0.0553(11) 0.0411(11) -0.0099(9) 0.0053(9) -0.0065(10)
S1 0.0673(5) 0.0593(5) 0.0390(4) 0.0027(3) 0.0090(3) -0.0087(4)
F1 0.128(5) 0.078(4) 0.069(4) 0.017(3) 0.071(4) 0.002(3)
F2 0.061(2) 0.099(2) 0.116(3) -0.0024(19) 0.0137(18) -0.0312(16)
 
_geom_special_details
;
 All esds (except the esd in the dihedral angle between two l.s. planes)
 are estimated using the full covariance matrix.  The cell esds are taken
 into account individually in the estimation of esds in distances, angles
 and torsion angles; correlations between esds in cell parameters are only
 used when they are defined by crystal symmetry.  An approximate (isotropic)
 treatment of cell esds is used for estimating esds involving l.s. planes.
;
 
loop_
 _geom_bond_atom_site_label_1
 _geom_bond_atom_site_label_2
 _geom_bond_distance
 _geom_bond_site_symmetry_2
 _geom_bond_publ_flag
C1 O1 1.376(3) . ?
C1 C6 1.378(4) . ?
C1 C2 1.382(4) . ?
C2 C3 1.380(4) . ?
C2 H2 0.9300 . ?
C3 C4 1.380(4) . ?
C3 H3 0.9300 . ?
C4 C5 1.370(4) . ?
C4 H4 0.9300 . ?
C5 C6 1.395(4) . ?
C5 H5 0.9300 . ?
C6 C7 1.432(4) . ?
C7 C8 1.340(4) . ?
C7 H7 0.9300 . ?
C8 O1 1.388(3) . ?
C8 C9 1.449(4) . ?
C9 C10 1.341(4) . ?
C9 N1 1.403(3) . ?
C10 S1 1.725(3) . ?
C10 H10 0.9300 . ?
C11 N2 1.277(3) . ?
C11 N1 1.386(3) . ?
C11 S1 1.771(3) . ?
C12 C17 1.367(4) . ?
C12 C13 1.375(3) . ?
C12 N1 1.442(3) . ?
C13 C14 1.380(4) . ?
C13 H13 0.9300 . ?
C14 C15 1.363(4) . ?
C14 H14 0.9300 . ?
C15 C16 1.372(4) . ?
C15 H15B 0.9300 . ?
C16 C17 1.377(4) . ?
C16 H16 0.9300 . ?
C17 H17 0.9300 . ?
C18 C23 1.385(4) . ?
C18 C19 1.385(4) . ?
C18 N2 1.407(3) . ?
C19 C20 1.372(4) . ?
C19 H19 0.9300 . ?
C20 C21 1.362(4) . ?
C20 H20 0.9300 . ?
C21 C22 1.352(4) . ?
C21 H21 0.9300 . ?
C22 C23 1.376(4) . ?
C22 H22 0.9300 . ?
C23 H23 0.9300 . ?
 
loop_
 _geom_angle_atom_site_label_1
 _geom_angle_atom_site_label_2
 _geom_angle_atom_site_label_3
 _geom_angle
 _geom_angle_site_symmetry_1
 _geom_angle_site_symmetry_3
 _geom_angle_publ_flag
O1 C1 C6 110.5(2) . . ?
O1 C1 C2 125.7(3) . . ?
C6 C1 C2 123.7(3) . . ?
C3 C2 C1 115.9(3) . . ?
C3 C2 H2 122.1 . . ?
C1 C2 H2 122.1 . . ?
C4 C3 C2 121.6(3) . . ?
C4 C3 H3 119.2 . . ?
C2 C3 H3 119.2 . . ?
C5 C4 C3 121.6(3) . . ?
C5 C4 H4 119.2 . . ?
C3 C4 H4 119.2 . . ?
C4 C5 C6 118.2(3) . . ?
C4 C5 H5 120.9 . . ?
C6 C5 H5 120.9 . . ?
C1 C6 C5 118.9(3) . . ?
C1 C6 C7 105.5(2) . . ?
C5 C6 C7 135.5(3) . . ?
C8 C7 C6 107.5(2) . . ?
C8 C7 H7 126.2 . . ?
C6 C7 H7 126.2 . . ?
C7 C8 O1 110.7(2) . . ?
C7 C8 C9 136.7(2) . . ?
O1 C8 C9 112.6(2) . . ?
C10 C9 N1 112.6(2) . . ?
C10 C9 C8 125.3(2) . . ?
N1 C9 C8 122.0(2) . . ?
C9 C10 S1 113.1(2) . . ?
C9 C10 H10 123.5 . . ?
S1 C10 H10 123.5 . . ?
N2 C11 N1 122.2(2) . . ?
N2 C11 S1 129.1(2) . . ?
N1 C11 S1 108.59(18) . . ?
C17 C12 C13 120.7(3) . . ?
C17 C12 N1 118.5(2) . . ?
C13 C12 N1 120.8(2) . . ?
C12 C13 C14 119.3(3) . . ?
C12 C13 H13 120.3 . . ?
C14 C13 H13 120.3 . . ?
C15 C14 C13 119.7(3) . . ?
C15 C14 H14 120.2 . . ?
C13 C14 H14 120.2 . . ?
C14 C15 C16 121.1(3) . . ?
C14 C15 H15B 119.4 . . ?
C16 C15 H15B 119.4 . . ?
C15 C16 C17 119.2(3) . . ?
C15 C16 H16 120.4 . . ?
C17 C16 H16 120.4 . . ?
C12 C17 C16 119.9(3) . . ?
C12 C17 H17 120.1 . . ?
C16 C17 H17 120.1 . . ?
C23 C18 C19 118.0(3) . . ?
C23 C18 N2 123.7(3) . . ?
C19 C18 N2 118.1(2) . . ?
C20 C19 C18 121.0(3) . . ?
C20 C19 H19 119.5 . . ?
C18 C19 H19 119.5 . . ?
C21 C20 C19 119.3(3) . . ?
C21 C20 H20 120.4 . . ?
C19 C20 H20 120.4 . . ?
C22 C21 C20 121.6(3) . . ?
C22 C21 H21 119.2 . . ?
C20 C21 H21 119.2 . . ?
C21 C22 C23 119.4(3) . . ?
C21 C22 H22 120.3 . . ?
C23 C22 H22 120.3 . . ?
C22 C23 C18 120.9(3) . . ?
C22 C23 H23 119.6 . . ?
C18 C23 H23 119.6 . . ?
C11 N1 C9 114.5(2) . . ?
C11 N1 C12 120.4(2) . . ?
C9 N1 C12 125.1(2) . . ?
C11 N2 C18 121.4(2) . . ?
C1 O1 C8 105.8(2) . . ?
C10 S1 C11 91.03(13) . . ?
 
loop_
 _geom_hbond_atom_site_label_D 
 _geom_hbond_atom_site_label_H 
 _geom_hbond_atom_site_label_A 
 _geom_hbond_distance_DH 
 _geom_hbond_distance_HA 
 _geom_hbond_distance_DA 
 _geom_hbond_angle_DHA 
 _geom_hbond_site_symmetry_A 
 _geom_hbond_publ_flag
C7 H7 F2^b  0.93 2.60 3.392(4) 142.7 1_445 yes
C19 H19 F1^b  0.93 2.32 3.192(6) 156.1 3_666 yes
C2 H2 S1  0.93 3.22 3.812(3) 123.0 2_645 yes
C10 H10 O1  0.93 2.73 3.261(3) 117.2 2_655 yes
C13 H13 N2  0.93 2.72 3.634(3) 167.4 1_545 yes
 
_refine_diff_density_max    0.206
_refine_diff_density_min   -0.255
_refine_diff_density_rms    0.047

_shelx_res_file
;
TITL bmk2128 in P2(1)/c
    shelx.res
    created by SHELXL-2018/1 at 14:23:19 on 06-Jul-2023
CELL  0.71073  10.6289   5.6010  30.5667   90.000   95.645   90.000
ZERR     4.00   0.0009   0.0003   0.0022    0.000    0.007    0.000
LATT   1
SYMM  - X, 1/2 + Y, 1/2 - Z
SFAC  C    H    N    O    S    F
UNIT  92 60 8 4 4 4
MERG   2
dfix 1.37 .01 c15 f1
MPLA C1 C2 C3 C4 C5 C6 C7 C8 O1
MPLA C9 C10 C11 N1 S1
MPLA C12 C13 C14 C15 C16 C17 F1
MPLA C9 C10 C11 N1 S1
MPLA C18 C19 C20 C21 C22 C23 N2 F2
EQIV $1 x-1, y-1, z
HTAB C7 F2_$1
EQIV $2 -x+1, -y+1, -z+1
HTAB C19 F1_$2
EQIV $3 -x+1, y-1/2, -z+1/2
HTAB C2 S1_$3
EQIV $4 -x+1, y+1/2, -z+1/2
HTAB C10 O1_$4
EQIV $5 x, y-1, z
HTAB C13 N2_$5
FMAP   2
PLAN   10
SIZE     0.070   0.130   0.550
ACTA
BOND   $H
LIST   4
L.S.   4
WGHT    0.033400    0.600400
EXTI    0.003549
FVAR       5.45982   0.66802
C1    1    0.246355    0.051675    0.287537    11.00000    0.05618    0.04653 =
         0.04196    0.00048   -0.00507   -0.00081
C2    1    0.217275   -0.123754    0.256362    11.00000    0.07571    0.06163 =
         0.04756   -0.01035   -0.00479   -0.00206
AFIX  43
H2    2    0.261411   -0.139850    0.231724    11.00000   -1.20000
AFIX   0
C3    1    0.118698   -0.273575    0.264052    11.00000    0.07789    0.05335 =
         0.06122   -0.00831   -0.01249   -0.01098
AFIX  43
H3    2    0.095374   -0.394346    0.243997    11.00000   -1.20000
AFIX   0
C4    1    0.053917   -0.248627    0.300741    11.00000    0.07021    0.06134 =
         0.06682    0.00541   -0.00674   -0.01481
AFIX  43
H4    2   -0.011718   -0.353465    0.304885    11.00000   -1.20000
AFIX   0
C5    1    0.083911   -0.073212    0.331215    11.00000    0.06553    0.06549 =
         0.05607    0.00370    0.00080   -0.00899
AFIX  43
H5    2    0.039388   -0.057551    0.355771    11.00000   -1.20000
AFIX   0
C6    1    0.183074    0.081320    0.324412    11.00000    0.05450    0.04616 =
         0.04224    0.00247   -0.00283    0.00170
C7    1    0.245997    0.274140    0.348307    11.00000    0.05825    0.05522 =
         0.03935   -0.00328    0.00518    0.00046
AFIX  43
H7    2    0.224923    0.337631    0.374737    11.00000   -1.20000
AFIX   0
C8    1    0.340794    0.346427    0.325641    11.00000    0.05460    0.04642 =
         0.02942   -0.00203   -0.00130    0.00380
C9    1    0.439807    0.524866    0.330710    11.00000    0.05150    0.04401 =
         0.03390   -0.00172   -0.00001    0.00297
C10   1    0.509192    0.597828    0.298875    11.00000    0.06565    0.05497 =
         0.03688   -0.00021    0.00351   -0.00531
AFIX  43
H10   2    0.498008    0.540861    0.270177    11.00000   -1.20000
AFIX   0
C11   1    0.577856    0.788926    0.371003    11.00000    0.05136    0.04189 =
         0.04142    0.00086    0.00803    0.00016
C12   1    0.417361    0.594003    0.411189    11.00000    0.05133    0.04285 =
         0.03360   -0.00416    0.00233   -0.00512
C13   1    0.443393    0.389643    0.435312    11.00000    0.06029    0.04405 =
         0.04557   -0.00201    0.00443    0.00486
AFIX  43
H13   2    0.500726    0.278407    0.426473    11.00000   -1.20000
AFIX   0
C14   1    0.383594    0.351231    0.472770    11.00000    0.07293    0.05020 =
         0.04672    0.00975    0.00516   -0.00838
AFIX  43
H14   2    0.399622    0.212796    0.489176    11.00000   -1.20000
PART  1
AFIX   0
C15   1    0.300920    0.517198    0.485605    11.00000    0.06999    0.06659 =
         0.05675   -0.00549    0.02146   -0.01468
AFIX  43
H15B  2    0.260965    0.490904    0.510909    21.00000   -1.20000
PART  0
AFIX   0
C16   1    0.275633    0.722404    0.461831    11.00000    0.06869    0.05849 =
         0.06923   -0.00574    0.02761    0.00386
AFIX  43
H16   2    0.219130    0.834483    0.470926    11.00000   -1.20000
AFIX   0
C17   1    0.334864    0.760489    0.424357    11.00000    0.06217    0.04566 =
         0.05401   -0.00023    0.01106    0.00215
AFIX  43
H17   2    0.318793    0.899185    0.408032    11.00000   -1.20000
AFIX   0
C18   1    0.735784    1.034954    0.405462    11.00000    0.05357    0.04532 =
         0.04237   -0.00574    0.00959   -0.00172
C19   1    0.838767    0.997756    0.436125    11.00000    0.07095    0.05525 =
         0.05175    0.00390    0.00321   -0.00591
AFIX  43
H19   2    0.839128    0.867498    0.455005    11.00000   -1.20000
AFIX   0
C20   1    0.940242    1.150235    0.439054    11.00000    0.05399    0.07532 =
         0.07171   -0.00032   -0.00366   -0.00484
AFIX  43
H20   2    1.009304    1.123100    0.459578    11.00000   -1.20000
PART  1
AFIX   0
C21   1    0.938710    1.341861    0.411558    11.00000    0.05453    0.06626 =
         0.07723   -0.00810    0.01852   -0.01345
AFIX  43
H21   2    1.007185    1.446009    0.413737   -21.00000   -1.20000
PART  0
AFIX   0
C22   1    0.840010    1.384186    0.381186    11.00000    0.06530    0.05366 =
         0.07063    0.01017    0.01552   -0.00478
AFIX  43
H22   2    0.840960    1.515334    0.362561    11.00000   -1.20000
AFIX   0
C23   1    0.738127    1.231480    0.378074    11.00000    0.05246    0.05265 =
         0.05806    0.00669    0.00569   -0.00261
AFIX  43
H23   2    0.669925    1.260648    0.357299    11.00000   -1.20000
AFIX   0
N1    3    0.475275    0.636272    0.371172    11.00000    0.05498    0.04571 =
         0.03402   -0.00283    0.00804   -0.00343
N2    3    0.631064    0.882005    0.406208    11.00000    0.05650    0.05004 =
         0.04056   -0.00361    0.00704   -0.01033
O1    4    0.343788    0.213312    0.287442    11.00000    0.06118    0.05534 =
         0.04106   -0.00987    0.00526   -0.00651
S1    5    0.621293    0.808165    0.316631    11.00000    0.06732    0.05929 =
         0.03904    0.00265    0.00896   -0.00867
PART  2
F1    6    0.235776    0.484590    0.517147   -21.00000    0.12809    0.07845 =
         0.06930    0.01659    0.07052    0.00236
F2    6    1.034826    1.491996    0.414416    21.00000    0.06106    0.09892 =
         0.11638   -0.00241    0.01368   -0.03122
HKLF    4


REM  bmk2128 in P2(1)/c
REM R1 =  0.0584 for    2364 Fo > 4sig(Fo)  and  0.1354 for all    4636 data
REM    264 parameters refined using      0 restraints

END

WGHT      0.0334      0.6004

REM Highest difference peak  0.206,  deepest hole -0.255,  1-sigma level  0.047
Q1    1   0.1433  0.8609  0.4506  11.00000  0.05    0.21
Q2    1   0.9543  1.1599  0.4057  11.00000  0.05    0.20
Q3    1   0.4563  0.5730  0.3493  11.00000  0.05    0.18
Q4    1   0.4410  0.9216  0.3204  11.00000  0.05    0.18
Q5    1   0.4099  0.4431  0.3263  11.00000  0.05    0.17
Q6    1   0.8788  1.3137  0.4482  11.00000  0.05    0.17
Q7    1   0.5405  0.2814  0.4280  11.00000  0.05    0.17
Q8    1   0.2167  0.1312  0.3422  11.00000  0.05    0.17
Q9    1   0.6052  1.1536  0.3165  11.00000  0.05    0.17
Q10   1   0.3050  0.3840  0.4714  11.00000  0.05    0.16
;
_shelx_res_checksum   61179

_shelx_hkl_file
;
   0   0   6 10558.1 558.829   1
   0   0  -6 9740.67 531.971   1
   0   0  -6 10958.0 728.875   4
   0   0   6 10859.7 702.505   4
   0   0   7 3011.03 379.830   1
   0   0  -7 3051.09 465.660   4
   0   0   8 219086. 2867.82   1
   0   0  -8 219047. 3679.04   4
   0   0   8 224350. 3566.73   4
   0   0   9 1965.90 371.761   1
   0   0  -9 1624.73 409.021   4
   0   0  10 96914.5 2171.84   1
   0   0  10 99334.8 2662.99   4
   0   0 -10 94645.6 2714.83   4
   0   0  11 3226.23 493.237   1
   0   0  11 4566.36 703.754   4
   0   0 -11 2711.47 564.843   4
   0   0  12 40797.2 1559.58   1
   0   0 -12 40755.1 1997.90   4
   0   0  12 44410.9 1958.41   4
   0   0  13 6324.68 662.417   1
   0   0  13 7679.66 898.375   4
   0   0  14 17856.6 1128.36   1
   0   0 -14 17300.2 1413.61   4
   0   0  14 19502.2 1419.47   4
   0   0  15 4280.76 608.303   1
   0   0  15 5055.08 793.164   4
   0   0 -15 2823.05 644.462   4
   0   0  16 15206.5 1100.85   1
   0   0  16 16628.9 1377.01   4
   0   0 -16 14839.4 1408.49   4
   0   0  17 1572.69 411.970   1
   0   0  17 1705.51 562.892   4
   0   0 -17 944.679 397.153   4
   0   0  18 19509.8 1318.69   1
   0   0  18 20701.8 1625.17   4
   0   0 -18 19295.2 1728.90   4
   0   0  19 1061.71 416.224   1
   0   0 -19 507.747 354.389   4
   0   0  20 47751.2 2194.16   1
   0   0 -20 51408.5 2995.36   4
   0   0  20 52580.7 2748.81   4
   0   0  21 1547.46 453.392   1
   0   0  21 2449.02 627.265   4
   0   0 -21 1712.66 611.872   4
   0   0  22 7042.61 874.143   1
   0   0  22 7263.57 1095.02   4
   0   0 -22 8255.78 1289.69   4
   0   0  23 2616.73 572.404   1
   0   0  23 2392.22 690.749   4
   0   0 -23 1468.68 599.224   4
   0   0  24 8382.36 996.442   1
   0   0 -24 7654.56 1311.18   4
   0   0  24 9276.37 1295.36   4
   0   0  25 3934.67 692.462   1
   0   0  25 4683.81 1249.67   5
   0   0  25 4529.72 972.571   4
   0   0  26 36022.7 2089.12   1
   0   0  26 36391.6 3321.52   5
   0   0  26 36839.2 2669.19   4
   0   0  27 3057.94 642.667   1
   0   0  27 4998.98 1250.01   5
   0   0  27 4141.29 934.073   4
   0   0  28 4163.07 1173.39   5
   0   0  29 3392.41 1118.09   5
   0   0  30 5775.57 1428.67   5
   0   0  31 4118.71 1271.62   5
   0   0  32 10194.4 2029.78   5
   0   0  33 2955.70 1120.28   5
   0   0  34 8790.28 1965.24   5
   0   0  35 3266.42 1227.34   5
   0   0  36 12495.1 2435.68   5
   0   0  37 2030.78 1018.12   5
   0   0  38 509.409 578.491   5
   0  -1   0 7.90634 98.0240   1
   0   1   0 7.85399 84.5085   1
   0   1   0 20.8775 86.7672   5
   0   1   0-77.4813 109.758   3
   0  -1   0 19.5365 95.6411   5
   0   1   1 57373.1 1157.18   2
   0  -1  -1 55184.9 1125.83   2
   0   1  -1 56643.7 1666.61   1
   0   1   1 55607.2 1487.05   1
   0  -1   1 58082.9 1536.31   5
   0   1  -1 57022.5 1471.03   5
   0   1   1 58149.4 1712.32   3
   0   1   2 15358.1 681.124   2
   0  -1  -2 14030.9 663.919   2
   0   1   2 14756.2 726.142   1
   0   1  -2 16515.8 943.655   1
   0   1  -2 13824.9 766.572   5
   0  -1   2 15037.8 817.173   5
   0   1   2 14512.8 882.981   3
   0  -1  -3 44189.2 1330.32   2
   0   1  -3 45647.9 1628.56   1
   0   1   3 44686.8 1174.83   1
   0   1  -3 45034.3 1446.90   5
   0  -1   3 45554.9 1506.62   5
   0   1   3 45216.6 1565.41   4
   0   1   3 44974.3 1596.81   3
   0  -1  -4 45095.5 1469.03   2
   0   1  -4 46140.1 1714.02   1
   0  -1   4 47628.7 1643.23   5
   0   1  -4 47982.4 1585.46   5
   0  -1  -4 45062.5 1666.49   4
   0   1   4 46419.7 1665.02   3
   0  -1  -5 1561.93 307.268   2
   0   1  -5 1595.94 340.552   1
   0  -1   5 1870.79 361.762   5
   0   1  -5 1541.63 315.886   5
   0  -1  -5 1302.11 297.121   4
   0  -1  -6 19935.5 1148.81   2
   0   1  -6 21007.6 1230.34   1
   0  -1   6 19176.8 1210.03   1
   0  -1   6 19365.7 1204.60   5
   0   1  -6 19644.6 1170.95   5
   0  -1  -6 20054.6 1234.44   4
   0   1  -7 74379.0 2384.24   1
   0  -1   7 75795.8 2410.84   1
   0  -1   7 77592.6 2516.04   5
   0  -1  -7 75715.2 2494.40   4
   0   1  -8 4298.96 599.148   1
   0  -1   8 5382.12 701.198   5
   0  -1  -8 4358.85 620.172   4
   0   1  -9 27344.1 1531.35   1
   0  -1   9 27233.4 1543.89   1
   0  -1   9 27458.2 1651.95   5
   0  -1  -9 28099.6 1664.00   4
   0   1  -9 26636.7 1210.71   4
   0  -1  10 17167.2 1266.29   1
   0   1 -10 16509.7 1222.67   1
   0  -1  10 15582.5 1353.14   5
   0  -1 -10 15921.0 1310.66   4
   0   1 -10 16086.5 1002.18   4
   0  -1  11 1403.42 504.028   1
   0   1 -11 10.3492 102.973   1
   0  -1  11 1078.63 527.572   5
   0  -1 -11 193.205 269.453   4
   0   1 -11 64.1643 110.542   4
   0  -1  12 51356.1 2271.52   1
   0   1 -12 52566.1 2272.26   1
   0   1  12 50867.3 1057.35   1
   0  -1  12 52139.9 2620.13   5
   0  -1 -12 51169.9 2505.90   4
   0   1 -12 51756.6 2013.81   4
   0  -1  13 1397.01 499.705   1
   0   1 -13 642.227 283.086   1
   0   1  13 929.969 154.261   1
   0  -1  13 1194.16 551.232   5
   0   1 -13 1019.76 328.652   4
   0  -1 -13 1765.57 526.760   4
   0   1  14 5129.75 384.439   1
   0  -1  14 5061.19 780.616   1
   0   1 -14 5453.22 784.184   1
   0  -1  14 5505.66 956.068   5
   0   1 -14 5116.28 700.990   4
   0  -1 -14 5393.89 875.830   4
   0   1  15 2840.75 305.554   1
   0   1 -15 2674.22 571.123   1
   0  -1  15 2161.26 527.682   1
   0  -1 -15 2426.80 608.622   4
   0   1 -15 2871.17 552.864   4
   0   1  16 742.355 176.708   1
   0  -1  16 491.958 301.647   1
   0   1 -16 588.440 309.116   1
   0  -1 -16 805.305 433.296   4
   0   1 -16 790.418 304.514   4
   0   1 -17 6889.32 913.712   1
   0   1  17 6869.42 527.966   1
   0  -1  17 7873.79 1025.11   1
   0  -1  17 7859.89 1240.20   5
   0  -1 -17 7481.43 1135.02   4
   0   1 -17 6935.72 917.410   4
   0  -1  18 26426.0 1876.42   1
   0   1  18 26908.0 1089.75   1
   0   1 -18 26670.5 1829.65   1
   0  -1  18 26879.4 2329.64   5
   0   1 -18 26912.4 1897.02   4
   0  -1 -18 28479.5 2269.11   4
   0   1 -19 8981.09 1087.26   1
   0   1  19 9375.30 673.875   1
   0  -1  19 12288.0 1759.21   5
   0   1  19 10316.0 1352.47   4
   0   1 -19 9370.76 1173.32   4
   0  -1 -19 10582.2 1440.39   4
   0   1  20 109852. 2353.32   1
   0   1 -20 113176. 3887.94   1
   0  -1  20 119975. 5157.51   5
   0  -1 -20 120458. 4926.81   4
   0   1  20 121060. 4571.87   4
   0   1 -20 115676. 4225.47   4
   0  -1 -21 6268.72 1198.55   2
   0   1 -21 7165.35 997.283   1
   0   1  21 8000.21 660.840   1
   0  -1  21 9327.44 1561.73   5
   0   1  21 7855.77 1224.84   4
   0   1 -21 7968.40 1165.84   4
   0  -1 -21 7211.86 1249.01   4
   0   1  22 4938.82 524.888   1
   0  -1 -22 5677.88 1148.24   2
   0  -1  22 4890.46 1202.70   5
   0  -1 -22 5803.61 1138.73   4
   0   1  22 4805.86 993.342   4
   0   1 -22 4529.13 910.457   4
   0   1  23 721.237 213.295   1
   0  -1  23 922.521 533.817   5
   0   1  23 620.487 365.693   4
   0   1 -23 663.114 362.982   4
   0   1  24 225.224 120.387   1
   0  -1  24 178.663 283.157   1
   0  -1  24 457.646 511.501   5
   0   1  24 340.369 349.554   4
   0   1 -24 231.183 272.493   4
   0  -1  25 7429.73 1127.12   1
   0  -1  25 9313.51 1664.96   5
   0   1 -25 8184.53 1318.44   4
   0   1  25 9151.58 1417.27   4
   0  -1  26 1783.33 567.850   1
   0  -1  26 2210.84 897.710   5
   0   1  26 1751.39 671.060   4
   0   1 -26 2091.61 699.907   4
   0  -1  27 2111.07 626.776   1
   0  -1  27 2977.33 976.926   5
   0   1  27 2408.27 776.583   4
   0  -1  28 941.356 432.079   1
   0  -1  28 746.061 633.470   5
   0   1  28 422.926 448.011   4
   0  -1  29 1412.33 515.478   1
   0  -1  29 1063.67 786.539   5
   0   1  29 1169.06 633.038   4
   0  -1  30-423.654 476.258   5
   0   1  30 919.834 504.405   4
   0   1  31 365.238 413.493   5
   0  -1  31 535.227 568.287   5
   0   1  31-800.440 502.848   4
   0   1  32 2014.03 895.559   5
   0  -1  32 3248.26 1159.10   5
   0   1  32 1757.58 727.313   4
   0  -1  33 4456.01 1355.59   5
   0   1  33 3586.14 1224.21   5
   0   1  33 4718.12 1177.81   4
   0   1  34 2264.43 998.940   5
   0  -1  34 2364.59 1049.34   5
   0   1  34 1097.34 591.864   4
   0  -1  35 3670.54 1358.00   5
   0   1  35 5203.20 1476.48   5
   0   1  35 4401.12 1166.55   4
   0  -1  36 3102.16 1268.91   5
   0   1  36 3781.28 1373.36   5
   0  -1  37 1219.34 838.008   5
   0   1  37-514.488 514.094   5
   0  -1  38 1044.20 741.626   5
   0   1  38 1329.53 847.169   5
   0   2   0 56273.9 1350.39   2
   0  -2   0 54824.4 1305.04   2
   0   2   0 53678.1 2229.22   1
   0   2   0 53929.6 2026.38   5
   0  -2   0 54464.0 2301.44   3
   0   2  -1 17241.1 701.917   2
   0  -2   1 17036.5 678.281   2
   0   2   1 17231.0 821.411   2
   0  -2  -1 16306.7 787.076   2
   0   2  -1 17349.2 1299.66   1
   0  -2   1 17978.6 1276.04   1
   0   2   1 17051.5 1212.08   1
   0   2   1 16281.3 1117.74   5
   0  -2   1 18197.9 1155.88   5
   0   2  -1 16729.1 1116.04   5
   0  -2  -1 16611.3 1281.84   3
   0  -2   1 17863.9 1317.27   3
   0   2   1 18061.0 1350.56   3
   0  -2  -2 76567.3 1879.72   2
   0   2   2 78045.8 1899.65   2
   0   2  -2 76099.4 1446.90   2
   0   2  -2 74613.8 2758.96   1
   0   2   2 76680.8 2517.96   1
   0  -2   2 81286.8 2775.46   1
   0   2   2 79404.9 2468.55   5
   0   2  -2 74346.3 2366.16   5
   0  -2   2 77566.7 2499.14   5
   0  -2   2 76616.6 2690.13   3
   0   2   2 77782.7 2849.59   3
   0  -2  -2 76815.5 2779.06   3
   0  -2  -3 26135.1 1186.85   2
   0   2  -3 27305.4 872.511   2
   0   2  -3 28271.8 1738.59   1
   0   2   3 26167.2 1426.52   1
   0  -2   3 26775.2 1638.12   1
   0   2  -3 27842.5 1455.80   5
   0  -2   3 25972.4 1489.48   5
   0   2   3 27929.7 1729.78   3
   0   2   4 738.443 300.221   3
   0   2  -4 723.962 160.763   2
   0   2  -4 220.955 202.916   1
   0   2   4 657.205 224.530   1
   0  -2  -4 790.211 221.245   2
   0  -2   4 549.632 230.458   5
   0   2  -4 691.994 266.428   5
   0   2   4 510.253 234.681   4
   0   2   5 2410.11 527.188   3
   0  -2  -5 2457.18 423.754   2
   0   2  -5 2388.96 525.465   1
   0   2   5 2082.94 396.937   1
   0   2  -5 2273.57 450.558   5
   0  -2   5 2569.25 500.620   5
   0   2   5 2317.68 509.555   4
   0  -2  -6 5893.48 690.708   2
   0   2   6 5722.87 616.489   1
   0   2  -6 5326.12 804.802   1
   0  -2   6 4335.39 691.582   5
   0   2  -6 4976.22 668.237   5
   0   2   6 5147.85 768.129   4
   0   2   6 5081.24 771.549   3
   0   2   7 707.518 302.859   3
   0   2  -7 767.394 335.920   1
   0  -2  -7 987.010 317.084   2
   0   2   7 748.543 229.374   1
   0  -2   7 1312.06 438.509   5
   0   2  -7 1190.71 376.801   5
   0   2   7 507.410 265.235   4
   0   2   8 57.5303 185.922   3
   0  -2  -8 260.344 202.864   2
   0   2  -8-109.656 257.151   1
   0   2   8 74.7900 97.8714   1
   0  -2   8-75.1078 255.066   5
   0   2  -8 61.1668 132.709   5
   0   2   8 77.3863 177.893   4
   0   2   9 227.186 169.838   3
   0   2   9 122.828 104.075   1
   0  -2  -9 181.773 166.746   2
   0   2  -9 215.063 155.583   1
   0  -2   9 136.640 259.119   5
   0   2  -9 179.799 168.230   5
   0  -2 -10 6793.30 917.478   2
   0   2 -10 6755.92 974.277   1
   0   2  10 7519.15 603.246   1
   0  -2  10 6157.60 924.271   5
   0   2  10 7394.56 997.300   3
   0  -2 -11 21089.4 1623.62   2
   0   2  11 22940.3 998.340   1
   0   2 -11 20770.0 1743.79   1
   0  -2  11 21217.0 1786.29   5
   0   2  11 23347.3 1815.57   3
   0  -2 -11 22644.2 1849.74   4
   0  -2 -12 75557.9 3188.38   2
   0   2  12 71842.7 1674.28   1
   0   2 -12 73618.9 3296.09   1
   0  -2  12 72433.9 3377.35   5
   0  -2 -12 73752.9 3415.01   4
   0   2  12 70430.3 3218.47   3
   0  -2 -13 78651.1 3456.42   2
   0   2  13 81537.0 1674.25   1
   0   2 -13 85258.1 3617.04   1
   0  -2  13 83448.7 3747.29   5
   0  -2 -13 83054.4 3731.67   4
   0  -2 -14 712.191 391.620   2
   0   2 -14 724.746 379.405   1
   0   2  14 1352.39 234.491   1
   0  -2  14 579.392 447.184   5
   0   2 -14 746.941 279.777   4
   0  -2 -14 1364.23 503.719   4
   0  -2 -15 18371.8 1763.41   2
   0   2  15 17654.3 658.827   1
   0   2 -15 18712.1 1761.15   1
   0  -2  15 16550.8 1794.68   5
   0  -2 -15 17413.8 1815.09   4
   0   2 -15 16340.9 1240.52   4
   0  -2 -16 19446.8 1889.54   2
   0   2 -16 21174.8 1883.26   1
   0  -2  16 20107.8 1832.49   1
   0  -2  16 22474.6 2141.18   5
   0  -2 -16 21647.1 2060.19   4
   0   2 -16 20215.0 1445.63   4
   0   2 -17 2759.09 690.042   1
   0  -2 -17 2952.05 757.271   2
   0  -2  17 3173.98 756.443   1
   0  -2  17 2643.11 796.851   5
   0   2 -17 2401.00 535.705   4
   0  -2 -17 1839.94 645.061   4
   0  -2 -18 11057.8 1493.52   2
   0   2 -18 9446.66 1329.54   1
   0  -2  18 10858.6 1385.46   1
   0  -2  18 10418.7 1522.66   5
   0  -2 -18 10265.4 1474.24   4
   0   2 -18 11067.9 1163.76   4
   0  -2 -19 533.962 355.525   2
   0   2 -19 554.746 350.083   1
   0  -2  19 564.705 362.126   1
   0  -2  19 361.450 368.722   5
   0   2 -19 584.375 290.784   4
   0  -2 -19 404.861 306.665   4
   0   2  19 329.987 303.854   4
   0   2 -20 2795.65 717.887   1
   0  -2 -20 2516.73 763.197   2
   0  -2  20 2026.79 616.534   1
   0  -2  20 2703.61 819.077   5
   0   2  20 2583.60 735.434   4
   0   2 -20 2543.69 600.389   4
   0  -2 -20 2569.87 783.568   4
   0   2 -21 4259.02 907.386   1
   0  -2  21 4441.86 953.210   1
   0  -2  21 5644.84 1220.23   5
   0   2  21 3727.33 898.095   4
   0   2 -21 3980.17 768.875   4
   0  -2  22 2766.81 768.588   1
   0   2 -22 3365.09 819.324   1
   0  -2  22 3992.88 1068.03   5
   0   2  22 3011.07 827.538   4
   0   2 -22 2982.34 691.264   4
   0  -2  23 4222.39 938.968   1
   0   2 -23 2792.89 749.205   1
   0  -2  23 3240.36 959.189   5
   0   2  23 1665.81 633.327   4
   0   2 -23 2984.35 735.649   4
   0  -2  24 899.211 455.972   1
   0   2 -24 613.026 359.443   1
   0  -2  24 909.725 660.042   5
   0   2  24 543.923 412.727   4
   0   2 -24 490.377 365.443   4
   0   2 -25 7632.45 1267.82   1
   0  -2  25 7201.82 1256.47   1
   0  -2  25 7189.87 1505.92   5
   0   2  25 8266.47 1430.67   4
   0   2 -25 8047.83 1262.26   4
   0  -2  26 14488.5 1774.86   1
   0  -2  26 13089.1 2118.63   5
   0   2  26 14276.7 1922.93   4
   0   2 -26 12966.5 1645.86   4
   0  -2  27 1908.42 672.486   1
   0  -2  27 1611.76 786.902   5
   0   2 -27 2201.61 686.603   4
   0   2  27 3050.25 913.223   4
   0  -2  28 2046.22 712.325   1
   0  -2  28 3220.18 1093.81   5
   0   2  28 2338.27 820.800   4
   0  -2  29 2558.24 1025.40   5
   0   2  29 1413.98 671.175   4
   0  -2  30 3718.48 1289.79   5
   0   2  30 3340.61 1018.81   4
   0  -2  31 2731.98 1098.77   5
   0   2  31 2862.86 966.299   4
   0  -2  32 1957.37 978.491   5
   0   2  32 1813.07 779.681   4
   0  -2  33 194.666 387.681   5
   0   2  33 455.871 422.211   4
   0  -2  34-442.558 541.301   5
   0   2  34 68.7525 181.546   5
   0   2  34 405.931 426.509   4
   0  -2  35 59.4512 176.797   5
   0   2  35-214.739 402.999   5
   0   2  35 803.788 542.363   4
   0   2  36 2071.99 923.859   5
   0  -2  36 1949.23 1081.38   5
   0   2  36 1012.63 601.098   4
   0   2  37 231.951 379.798   5
   0  -2  37 910.839 781.136   5
   0   2  37 121.079 351.437   4
   0  -3   0 88.0950 73.2327   2
   0   3   0-50.1737 134.295   5
   0   3   0 3.56209 153.941   1
   0   3   0-3.60594 92.1589   2
   0  -3  -1 61.7626 68.3647   2
   0   3   1 81.0029 93.5735   2
   0   3  -1 152.516 93.5490   2
   0   3  -1-268.995 222.199   1
   0   3   1 16.0450 134.742   1
   0   3  -1 81.2326 146.088   5
   0  -3  -2 522.550 178.298   2
   0   3  -2 331.364 256.536   1
   0   3  -2 585.376 155.321   2
   0   3   2 474.038 254.777   1
   0   3  -2 397.843 233.627   5
   0   3   2 643.550 281.366   5
   0   3   2 686.161 312.750   3
   0  -3   2 391.835 188.949   5
   0  -3  -3 3430.95 493.135   2
   0   3  -3 3248.92 351.257   2
   0   3   3 3437.92 673.097   1
   0   3  -3 3499.47 750.677   1
   0  -3   3 3339.05 652.447   5
   0   3   3 2383.70 538.748   5
   0   3  -3 2732.33 541.308   5
   0   3   3 3752.49 742.148   4
   0   3   3 3352.05 757.925   3
   0   3  -4 2172.12 288.620   2
   0  -3  -4 1654.62 363.657   2
   0   3   4 1675.96 468.865   1
   0   3  -4 1954.83 568.477   1
   0   3  -4 975.356 329.584   5
   0  -3   4 1626.54 476.274   5
   0   3   4 1764.75 500.352   4
   0   3   4 1714.96 519.611   3
   0   3   4 1967.88 513.551   5
   0  -3  -5 28988.4 1569.77   2
   0   3  -5 28262.8 1066.90   2
   0   3   5 27726.1 1792.84   1
   0   3  -5 29259.7 2213.63   1
   0   3  -5 28115.1 1780.31   5
   0  -3   5 27565.4 1929.05   5
   0   3   5 28910.0 2201.22   3
   0   3  -6 29485.8 1143.96   2
   0  -3  -6 29019.7 1644.43   2
   0   3  -6 29166.6 2233.56   1
   0   3   6 29773.4 1830.76   1
   0   3  -6 29385.6 1850.88   5
   0  -3   6 29286.8 2033.06   5
   0   3   6 28821.6 2230.87   3
   0   3  -7-123.625 150.012   2
   0   3   7 160.794 254.754   3
   0   3  -7-100.612 239.007   5
   0  -3   7 161.536 220.615   5
   0   3   7 221.592 222.969   1
   0  -3  -7 96.1900 123.409   2
   0   3  -7-134.242 214.372   1
   0   3  -8-26.0514 121.411   2
   0   3   8 149.016 183.988   3
   0  -3   8 98.5456 200.035   5
   0   3  -8 183.185 191.597   5
   0   3  -8 6.06435 266.155   1
   0   3   8 341.450 198.568   1
   0  -3  -8 7.68260 119.368   2
   0   3   9 1075.86 503.138   3
   0  -3  -9 577.428 299.678   2
   0   3  -9 618.082 394.523   1
   0   3   9 985.193 362.750   1
   0  -3   9 906.140 464.582   5
   0   3  -9 926.180 376.480   5
   0   3  10 6055.20 1113.96   3
   0  -3 -10 5938.03 880.176   2
   0   3  10 5763.36 736.286   1
   0   3 -10 7273.60 1197.89   1
   0   3 -10 5623.70 886.165   5
   0  -3  10 4960.22 950.737   5
   0   3  10 5373.31 959.309   4
   0  -3 -11 22223.0 1762.39   2
   0   3 -11 24652.5 2210.34   1
   0   3  11 21709.2 1366.67   1
   0  -3  11 22959.2 2068.76   5
   0   3  11 21365.4 1949.05   4
   0   3  11 24154.9 2216.52   3
   0   3  12 1062.24 537.005   3
   0   3  12 1265.72 352.106   1
   0   3 -12 1516.90 601.197   1
   0  -3 -12 1457.43 477.397   2
   0  -3  12 1661.32 581.808   5
   0   3  12 1689.12 641.443   4
   0   3  13 1110.82 551.437   3
   0  -3 -13 460.726 285.512   2
   0   3  13 649.203 243.463   1
   0  -3  13 468.500 408.371   1
   0   3 -13 1014.54 435.958   1
   0  -3  13 816.793 466.068   5
   0   3  13 215.919 212.140   4
   0  -3 -14 10058.5 1332.94   2
   0   3  14 10671.4 862.127   1
   0  -3  14 9048.36 1368.70   1
   0   3 -14 11834.9 1599.13   1
   0  -3  14 10664.6 1530.21   5
   0   3  14 10280.7 1434.39   4
   0   3  14 9460.53 1439.21   3
   0   3  15 213.330 195.623   3
   0   3 -15 279.506 291.081   1
   0  -3 -15 157.617 191.930   2
   0  -3  15 650.562 416.784   1
   0   3  15 481.164 181.097   1
   0  -3  15 339.133 354.168   5
   0   3  15 267.247 371.210   4
   0   3  16 3981.16 966.466   3
   0  -3 -16 4030.15 904.359   2
   0   3 -16 4344.97 970.588   1
   0  -3  16 4402.05 969.919   1
   0   3  16 3871.89 462.752   1
   0  -3  16 3390.56 894.415   5
   0   3  16 3773.62 907.667   4
   0  -3  17 6356.01 1194.79   1
   0  -3 -17 5701.82 1109.24   2
   0   3 -17 5528.40 1137.00   1
   0   3  17 5606.91 492.012   1
   0  -3  17 5855.68 1228.12   5
   0   3 -17 5313.22 771.425   4
   0   3  17 4839.28 1047.07   4
   0  -3 -18 18459.8 2005.75   2
   0  -3  18 13100.5 1743.99   1
   0   3  18 17867.3 741.436   1
   0  -3  18 15700.4 2039.08   5
   0   3  18 18668.1 2053.08   4
   0   3 -18 15417.0 1347.99   4
   0  -3  19 2118.51 797.024   1
   0  -3 -19 2015.79 721.978   2
   0  -3  19 1793.24 821.290   5
   0   3  19 2998.28 859.642   4
   0   3 -19 2722.36 573.501   4
   0  -3  20 3217.32 901.120   1
   0  -3  20 1780.46 686.430   5
   0   3 -20 2481.68 580.207   4
   0   3  20 2693.54 881.734   4
   0  -3  21 3473.99 959.584   1
   0  -3  21 2957.73 1027.15   5
   0   3  21 3095.63 886.401   4
   0   3 -21 2519.45 609.984   4
   0  -3  22 470.306 389.255   1
   0  -3  22 39.4759 450.647   5
   0   3 -22 113.225 194.916   4
   0   3  22-105.338 310.442   4
   0  -3  23 424.030 431.242   1
   0  -3  23 439.164 470.941   5
   0   3  23 339.511 478.745   4
   0   3 -23 284.863 233.281   4
   0  -3  24 2.16931 230.052   1
   0  -3  24-22.9756 381.522   5
   0   3 -24 126.252 169.714   4
   0   3  24-130.810 319.137   4
   0  -3  25 1097.40 648.479   5
   0   3 -25 930.483 411.809   4
   0   3  25 2548.58 864.807   4
   0  -3  26 6276.78 1526.13   5
   0   3  26 9527.16 1681.01   4
   0   3 -26 6568.80 1119.73   4
   0  -3  27 2600.17 992.233   5
   0   3  27 1825.50 754.502   4
   0   3 -27 980.158 443.192   4
   0  -3  28 40.8566 256.668   5
   0   3  28 419.754 363.102   4
   0  -3  29 1406.30 754.264   5
   0   3  29 1373.00 688.742   4
   0  -3  30 514.598 584.233   5
   0   3  30 830.236 508.683   4
   0  -3  31 2430.18 1057.61   5
   0   3  31 2621.85 960.246   4
   0  -3  32-64.5478 541.794   5
   0   3  32 650.974 562.427   4
   0  -3  33 356.951 477.913   5
   0   3  33 738.928 538.639   4
   0  -3  34-646.644 698.081   5
   0   3  34-211.217 355.102   4
   0  -3  35 2426.81 1163.94   5
   0   3  36 38.2936 297.847   5
   0  -3  36 938.887 723.760   5
   0  -4   0 1890.83 660.584   3
   0   4   0 1659.76 582.997   1
   0   4   0 1264.42 421.642   5
   0  -4  -1 25066.4 1213.35   2
   0   4   1 25263.6 2197.63   1
   0   4  -1 28888.3 2409.12   1
   0   4   1 25782.7 1929.80   5
   0   4  -1 24982.9 1846.28   5
   0  -4   1 24835.5 2227.73   3
   0  -4  -1 27584.8 2372.93   3
   0  -4  -2-66.0515 256.811   3
   0  -4   2-222.752 295.856   3
   0  -4  -2 129.264 82.3967   2
   0   4   2-76.7068 259.722   5
   0   4  -2 430.728 264.302   5
   0   4  -2 276.875 257.132   1
   0   4   2 195.169 170.977   1
   0  -4   3-998.969 491.827   3
   0  -4  -3 38.0977 124.194   2
   0  -4  -3-994.053 500.799   3
   0   4   3-121.412 244.478   5
   0   4  -3 12.4053 141.203   5
   0   4  -3-21.5223 123.321   2
   0   4   3-82.8310 186.432   1
   0   4  -3-107.447 202.402   1
   0  -4   4 3525.18 847.406   3
   0   4  -4 3102.22 321.651   2
   0  -4  -4 3264.04 538.491   2
   0  -4  -4 2677.19 776.185   3
   0   4   4 2879.45 730.725   1
   0   4  -4 3832.55 913.608   1
   0   4  -4 3097.06 652.419   5
   0   4   4 2588.66 666.609   5
   0  -4  -5 10832.3 1009.91   2
   0   4  -5 9801.71 576.982   2
   0   4  -5 10285.8 1499.18   1
   0   4   5 10729.3 1345.75   1
   0   4   5 9800.12 1306.37   5
   0   4  -5 9682.37 1148.97   5
   0  -4   5 9117.36 1195.26   5
   0  -4   5 9657.85 1399.77   3
   0   4   5 9758.89 1330.61   4
   0  -4  -5 9166.72 1372.21   3
   0   4   5 9895.02 1496.16   3
   0  -4  -6 2484.42 737.425   3
   0   4  -6 2329.22 288.343   2
   0  -4   6 1590.86 602.532   3
   0  -4  -6 2419.88 508.048   2
   0   4  -6 2872.37 809.060   1
   0   4   6 2046.56 595.884   1
   0   4  -6 2124.77 554.514   5
   0   4   6 2331.63 700.691   5
   0  -4   6 2818.01 714.822   5
   0   4   6 1840.00 643.971   3
   0   4   6 2078.67 661.874   4
   0  -4  -7 14877.8 1333.28   2
   0   4  -7 15613.7 818.437   2
   0   4   7 15033.9 1542.13   1
   0   4  -7 15888.0 1909.53   1
   0   4  -7 13947.9 1425.08   5
   0  -4   7 15851.6 1692.43   5
   0   4   7 14464.0 1642.62   5
   0   4   7 14060.3 1842.32   3
   0   4   7 15212.0 1703.53   4
   0  -4   7 14476.4 1737.73   3
   0   4  -8 285.286 104.858   2
   0  -4  -8-12.9656 254.841   2
   0   4   8 507.881 295.498   1
   0   4  -8 203.021 206.941   5
   0  -4   8 111.945 284.413   5
   0  -4   8 714.227 492.632   3
   0   4   8 38.3986 232.104   4
   0   4   8 428.338 308.334   5
   0   4  -9 13991.9 880.802   2
   0  -4  -9 14332.0 1391.09   2
   0   4   9 13044.9 1385.94   1
   0   4  -9 14810.3 1500.88   5
   0  -4   9 14910.4 1730.95   5
   0   4   9 12819.7 1613.76   4
   0  -4   9 12770.2 1628.39   3
   0   4 -10-47.9729 121.359   2
   0   4  10 171.267 245.835   1
   0  -4 -10 102.279 143.664   2
   0  -4  10 287.372 249.261   5
   0   4 -10-110.151 167.396   5
   0   4  10 322.060 289.327   4
   0  -4  10 337.604 317.715   3
   0   4 -11 428.746 209.372   2
   0   4  11 372.361 232.663   1
   0  -4 -11 706.227 311.643   2
   0   4 -11 386.631 258.393   5
   0  -4  11-185.580 274.888   5
   0   4  11 533.528 490.408   4
   0   4 -12 410.911 208.062   2
   0  -4 -12 366.049 295.139   2
   0   4  12 340.435 234.524   1
   0  -4  12 366.496 334.274   5
   0   4  12 839.436 508.504   4
   0  -4 -13 18473.9 1822.05   2
   0   4 -13 17889.1 1273.04   2
   0   4  13 16894.7 1426.02   1
   0  -4  13 18874.6 2135.16   5
   0   4  13 19123.5 2109.46   4
   0  -4 -14 8355.64 1259.26   2
   0   4  14 6695.81 876.395   1
   0  -4  14 7742.17 1413.03   5
   0   4  14 7191.84 1325.73   4
   0   4  15 798.948 293.865   1
   0  -4 -15 1316.53 546.271   2
   0  -4  15 1344.61 630.756   5
   0   4  15 1281.99 593.039   4
   0  -4 -16 751.674 411.482   2
   0   4  16 1047.16 330.520   1
   0  -4  16 590.889 445.642   5
   0   4  16 1371.73 737.101   4
   0   4  17 3734.37 573.486   1
   0  -4 -17 3665.96 893.440   2
   0  -4  17 4218.04 1121.85   5
   0   4  17 3765.53 996.284   4
   0   4  18 367.944 183.062   1
   0  -4  18 438.676 412.096   5
   0   4  18 391.908 389.879   4
   0   4  19-107.221 101.242   1
   0  -4  19 65.0602 343.653   5
   0   4  19-410.788 427.296   4
   0   4 -19-41.7946 136.085   4
   0  -4  20 110.021 498.923   5
   0   4  20 211.033 344.320   4
   0   4 -20 20.8468 117.781   4
   0  -4  21 8815.64 1795.92   5
   0   4  21 7784.39 1513.92   4
   0   4 -21 5674.79 917.753   4
   0  -4  22 1128.74 752.981   5
   0   4 -22 912.664 373.493   4
   0   4  22 1014.47 626.823   4
   0  -4  23 3757.69 1332.59   5
   0   4  23 3894.95 1074.82   4
   0   4 -23 5122.52 923.380   4
   0  -4  24 1298.85 733.484   5
   0   4  24-299.496 387.088   4
   0  -4  25-416.270 440.191   5
   0   4  25 850.570 606.575   4
   0  -4  26 2547.43 1029.37   5
   0   4  26 1982.15 855.952   4
   0  -4  27 1103.10 712.620   5
   0   4  27-296.576 401.285   4
   0  -4  28 463.692 516.744   5
   0   4  28 24.1858 220.682   4
   0  -4  29 916.057 674.389   5
   0   4  29 410.391 441.119   4
   0  -4  30 79.0067 212.645   5
   0   4  30 1049.28 683.349   4
   0  -4  31 928.666 751.735   5
   0   4  31 1250.22 706.717   4
   0  -4  32 1493.37 850.479   5
   0  -4  33 69.8094 204.590   5
   0  -4  34 1231.03 830.596   5
   0  -4  35 540.545 626.425   5
   0  -5   0-390.261 391.885   3
   0   5   0-677.070 349.657   5
   0   5   0-5.09684 248.343   4
   0  -5   1 2346.74 797.201   3
   0  -5  -1 1819.52 734.702   3
   0   5   1 1990.76 568.968   5
   0   5  -1 2108.10 581.414   5
   0   5  -1 2707.89 723.953   4
   0   5   1 2002.11 646.954   4
   0  -5   2-85.0385 341.506   3
   0  -5  -2-569.919 455.202   3
   0   5   2-629.818 365.166   5
   0   5  -2-262.290 243.387   5
   0   5   2-137.226 275.453   4
   0  -5  -3 5916.22 1273.49   3
   0  -5   3 6064.68 1272.67   3
   0  -5  -3 6560.84 712.531   2
   0   5   3 5853.33 1172.62   1
   0   5  -3 6181.19 971.101   5
   0   5   3 6272.62 1086.55   5
   0   5   3 6710.80 1215.08   4
   0  -5  -4 2751.46 500.797   2
   0  -5  -4 2826.27 889.958   3
   0  -5   4 2734.42 842.835   3
   0   5   4 2562.78 773.752   1
   0   5  -4 2768.62 631.790   5
   0   5   4 2469.68 690.003   5
   0   5   4 2474.19 754.346   4
   0  -5  -5 376.462 209.464   2
   0  -5   5-81.1909 360.617   3
   0  -5  -5 157.003 289.012   3
   0   5   5-214.229 244.004   1
   0   5  -5 376.995 291.686   5
   0   5   5 520.162 326.257   5
   0   5   5 176.830 313.481   4
   0  -5   6 3194.70 917.979   3
   0  -5  -6 5285.14 764.910   2
   0   5   6 3943.86 934.056   1
   0   5  -6 4100.86 790.682   5
   0   5   6 4108.87 951.974   5
   0   5   6 4459.57 1024.85   4
   0  -5  -7 5200.90 794.654   2
   0  -5   7 3921.11 1021.04   3
   0   5   7 4440.18 958.957   1
   0   5   7 5775.24 1154.08   5
   0   5  -7 5531.07 921.142   5
   0   5   7 4560.51 1045.80   4
   0  -5  -8 3552.80 695.717   2
   0  -5   8 2742.53 848.206   3
   0   5   8 2392.07 707.799   1
   0   5  -8 2674.02 647.229   5
   0   5   8 2293.26 735.853   5
   0  -5   8 3031.24 841.263   5
   0   5   8 1005.84 531.960   4
   0  -5  -9 108.472 130.015   2
   0  -5   9-96.4426 253.022   3
   0   5   9-10.0198 145.545   1
   0   5  -9 72.2999 166.920   5
   0   5   9 557.943 408.084   5
   0  -5   9 727.437 439.155   5
   0   5   9 823.961 479.717   4
   0  -5 -10 1468.20 503.602   2
   0  -5  10 2695.60 869.699   3
   0   5  10 1570.50 563.685   1
   0   5 -10 2165.77 623.490   5
   0   5  10 1706.30 633.378   5
   0  -5  10 2068.08 697.673   5
   0   5  10 1756.56 670.756   4
   0  -5 -11-246.504 207.323   2
   0   5  11 366.759 284.207   1
   0  -5  11 331.857 324.287   5
   0  -5  11 18.3776 313.495   3
   0   5  11 115.822 209.071   5
   0   5  11 382.747 322.238   4
   0   5 -12-60.1604 67.3928   2
   0  -5 -12-126.506 167.892   2
   0   5 -12-66.4422 65.4499   2
   0   5  12 26.8589 189.560   1
   0  -5  12 76.0574 356.932   5
   0   5  12 158.460 378.657   4
   0  -5  12 90.6616 234.674   3
   0   5  12 297.189 347.349   5
   0  -5 -13 5398.08 1022.87   2
   0   5 -13 5920.81 590.035   2
   0   5 -13 6682.58 597.408   2
   0   5  13 5624.21 966.278   1
   0  -5  13 5774.67 1262.78   5
   0   5  13 6416.04 1368.53   5
   0  -5  13 6562.03 1379.83   3
   0   5  13 6470.17 1359.90   4
   0  -5 -14 360.930 300.964   2
   0   5 -14 733.734 223.728   2
   0   5  14 878.384 366.814   1
   0  -5  14 1016.11 578.592   5
   0   5  14 9.68725 214.033   4
   0  -5  14 513.965 427.918   3
   0   5 -15 13970.0 1032.45   2
   0  -5 -15 12397.0 1635.33   2
   0   5  15 13368.7 1417.19   1
   0  -5  15 16549.9 2207.36   5
   0   5  15 14806.0 2076.10   4
   0  -5  15 14887.7 2034.16   3
   0   5 -16 76.3255 114.303   2
   0  -5  16 322.880 376.421   5
   0  -5  16-31.8281 271.345   3
   0   5  16 456.517 408.119   4
   0   5 -17 678.132 277.225   2
   0  -5  17 13.7437 240.020   5
   0   5  17 559.494 488.164   4
   0   5 -18 1184.87 401.354   2
   0  -5  18 546.271 480.523   5
   0   5  18 784.390 556.177   4
   0   5 -19 1290.74 408.978   2
   0  -5  19 1648.71 760.285   5
   0   5  19 1435.88 723.619   4
   0  -5  20 410.096 387.385   5
   0   5  20-11.3280 306.733   4
   0  -5  21 316.267 543.449   5
   0   5  21 543.732 478.052   4
   0  -5  22 115.360 333.571   5
   0   5  22-420.692 452.004   4
   0  -5  23 505.040 504.048   5
   0   5  23 998.583 651.644   4
   0  -5  24 930.162 672.006   5
   0   5  24 1933.24 862.496   4
   0  -5  25 619.232 521.610   5
   0   5  25 970.376 638.256   4
   0  -5  26 83.3827 232.437   5
   0   5  26-22.8147 266.159   4
   0  -5  27-90.6705 362.060   5
   0   5  27 407.860 462.478   4
   0  -5  28-222.084 331.050   5
   0  -5  29 340.479 456.836   5
   0  -5  30 73.3685 267.958   5
   0  -5  31 1881.75 1045.43   5
   0  -6   0 530.805 329.818   3
   0   6   0 1141.26 537.498   4
   0  -6   1-530.098 500.954   3
   0  -6  -1 237.712 489.959   3
   0   6   1 617.931 442.905   4
   0   6  -1 217.770 296.907   4
   0  -6   2 786.972 534.581   3
   0  -6  -2 499.510 469.518   3
   0   6  -2 546.439 386.961   4
   0   6   2 977.756 546.608   4
   0  -6   3 176.018 370.359   3
   0  -6  -3-840.348 559.589   3
   0   6   3 178.491 284.899   4
   0   6  -3-648.579 407.303   4
   0  -6   4-32.6528 224.303   3
   0   6   4 121.723 276.495   4
   0   6  -4-40.2148 212.700   4
   0  -6   5 4082.11 1133.00   3
   0   6   5 6200.32 1298.07   4
   0   6  -5 5631.33 1131.23   4
   0  -6   6 2699.19 981.592   3
   0   6   6 2392.59 879.022   4
   0   6  -6 1785.12 635.939   4
   0  -6   7 1121.86 660.980   3
   0   6   7 324.140 373.019   4
   0  -6   8 368.426 431.574   3
   0   6   8 573.704 475.952   4
   0  -6   9-1357.00 698.338   3
   0   6   9 221.364 354.427   4
   0  -6  10-200.484 332.036   3
   0   6  10-429.585 425.108   4
   0  -6  11-153.016 326.346   3
   0   6  11 119.866 318.623   4
   0  -6  12 185.676 332.096   3
   0   6  12 16.3736 279.497   4
   0  -6  13 427.269 434.188   3
   0   6  13 636.704 484.019   4
   0  -6  14 843.284 572.102   3
   0   6  14 1162.27 649.450   4
   0  -6  15 362.369 422.897   3
   0   6  15 635.365 531.749   4
   0  -6  16 402.710 435.055   3
   0   6  16-129.029 410.337   4
   0  -6  17 2286.34 935.523   3
   0   6  17 1873.27 852.743   4
   0  -6  18-241.954 317.675   3
   0   6  18-198.090 397.690   4
   0  -6  19-595.572 529.551   3
   0   6  19 763.914 600.224   4
   0  -6  20 37.6940 239.164   3
   0   6  20 94.8134 354.166   4
   0  -6  21 998.436 652.603   3
   0   6  21 935.113 648.235   4
   0  -6  22 1439.33 885.187   3
   0   6  22 255.937 441.245   4
   0   6  23-17.4261 342.903   4
   0  -6  23-342.238 461.439   3
   0  -6  24 788.945 603.809   3
   0  -6  25 347.848 376.522   3
   0  -6  26-386.008 506.673   3
   0  -6  27 786.784 603.911   3
   0  -7   0 163.426 320.223   3
   0   7   0 461.572 383.483   4
   0  -7   1 737.412 593.177   3
   0   7   1 356.191 369.438   4
   0   7  -1 950.196 521.697   4
   0  -7   2 391.730 457.763   3
   0   7   2 144.334 244.375   4
   0  -7   3 707.120 811.607   3
   0   7   3 1838.59 781.736   4
   0  -7   4-55.7142 316.085   3
   0   7   4 709.068 492.567   4
   0  -7   5 26.3200 288.867   3
   0   7   5 949.352 602.105   4
   0  -7   6 115.773 327.583   3
   0   7   6-911.778 574.333   4
   0  -7   7 342.474 447.211   3
   0   7   7 971.567 599.892   4
   0  -7   8 1287.59 712.103   3
   0   7   8 3002.79 1038.76   4
   0  -7   9 816.938 635.493   3
   0   7   9-237.507 378.747   4
   0  -7  10 756.228 580.981   3
   0   7  10 907.364 594.514   4
   0  -7  11 621.000 538.912   3
   0   7  11 716.412 553.985   4
   0  -7  12 252.277 404.043   3
   0   7  12 1481.70 767.559   4
   0  -7  13 619.567 617.543   3
   0   7  13 574.721 639.683   4
   0  -7  14 150.981 273.219   3
   0   7  14 495.209 525.792   4
   0  -7  15 672.070 549.104   3
   0   7  15 213.706 306.892   4
   0  -7  16 81.9282 221.945   3
   0   7  16 169.386 361.840   4
   0  -7  17 505.833 534.967   3
   0   7  17 545.677 631.272   4
   0  -7  18 2199.03 1015.97   3
   0  -7  19 1260.83 792.720   3
  -1   0  38 4058.21 1468.05   5
  -1   0  37 264.978 425.867   5
  -1   0  36 2378.30 1115.22   5
  -1   0  35-203.014 415.023   5
  -1   0  34 2786.81 1119.64   5
  -1   0  33 648.983 564.883   5
  -1   0  32 2095.06 942.480   5
  -1   0  31 92.2394 257.676   5
  -1   0  30 13989.3 2278.18   5
  -1   0  29 347.725 281.686   5
  -1   0  28 1832.55 813.193   5
  -1   0  27 345.630 375.341   5
  -1   0  26 1101.76 596.583   5
  -1   0  25 658.290 580.177   5
  -1   0  24 3456.82 991.304   5
   1   0 -24 3225.42 858.094   4
  -1   0  23 677.720 445.359   5
   1   0 -23 35.3958 141.026   4
  -1   0  22 2650.86 831.442   5
   1   0 -22 1315.20 507.132   4
   1   0 -21-161.137 194.198   4
   1   0 -20 949.400 441.026   4
   1   0 -19-170.336 144.804   1
   1   0 -19-197.279 198.557   4
   1   0 -18 47697.8 1881.26   1
  -1   0  18 50829.4 2569.21   4
   1   0 -18 54352.5 2904.08   4
   1   0 -17-54.2520 101.405   1
   1   0 -17-6.05483 94.2429   4
   1   0 -16 14198.2 985.689   1
   1   0 -16 15241.7 1416.33   4
   1   0 -15-166.500 133.410   1
   1   0 -15-87.7549 211.393   4
   1   0 -14 69709.2 2043.67   1
   1   0 -14 70498.2 2847.27   4
   1   0 -13-108.578 120.388   1
   1   0 -13-2.67652 122.097   4
   1   0 -12 109187. 2406.08   1
  -1   0  12 113553. 3128.97   4
   1   0 -12 111958. 3312.72   4
   1   0 -11 34.4102 108.095   1
   1   0 -11-28.3561 174.806   4
   1   0 -10 100460. 2155.23   1
  -1   0  10 101794. 2745.59   4
   1   0 -10 101256. 2853.67   4
   1   0  -9 2.46816 83.1954   1
   1   0  -9-41.9309 112.619   4
   1   0  -8 22426.1 925.659   1
   1   0  -8 23024.1 1208.05   4
   1   0  -7 125.761 101.384   1
   1   0  -7 32.5120 100.524   4
   1   0  -6 868169. 7641.42   5
   1   0  -6 856144. 6527.87   4
   1   0  -5-88.6127 115.150   5
   1   0  -5 40.4403 90.5191   4
  -1   0  -4 33242.9 1245.66   2
  -1   0  -5-18.4415 110.272   2
   1   0   5 48.7106 115.984   4
  -1   0  -5 45.3169 80.6724   4
  -1   0  -6 60632.9 2017.97   2
   1   0   6 66220.2 1796.62   4
  -1   0  -6 65820.5 1845.34   4
  -1   0  -7 68.6960 151.920   2
   1   0   7 187.112 126.448   4
  -1   0  -7-202.842 131.351   4
  -1   0  -8 64575.4 2289.08   2
   1   0   8 66803.1 2037.05   4
  -1   0  -8 66917.6 2093.79   4
  -1   0  -9-14.2538 156.694   2
   1   0   9-16.8592 181.088   4
  -1   0  -9-101.507 170.313   4
   1   0  10 14799.0 948.203   1
  -1   0 -10 15346.2 1229.44   2
  -1   0 -10 15008.9 1107.72   4
   1   0  10 15598.4 1088.95   4
   1   0  11-13.3109 101.864   1
  -1   0 -11 82.3810 188.499   2
   1   0  11-33.8625 142.857   4
  -1   0 -11 12.1003 130.678   4
   1   0  12 7154.23 713.574   1
  -1   0 -12 7059.37 936.210   2
   1   0  12 8812.85 899.754   4
  -1   0 -12 6824.39 835.287   4
  -1   0 -13 602.735 385.632   2
   1   0  13 48.5500 122.316   1
  -1   0 -13 455.647 348.950   4
   1   0  13-70.0438 178.726   4
   1   0  14 101221. 2813.07   1
  -1   0 -14 107100. 3829.53   2
  -1   0 -14 109793. 3543.19   4
   1   0  14 110182. 3342.63   4
  -1   0 -15 357.059 291.733   2
   1   0  15 23.4895 206.523   1
   1   0  15 110.648 314.332   4
  -1   0 -15 570.672 358.890   4
   1   0  16-36.4397 193.140   1
  -1   0 -16-1.33379 170.269   2
  -1   0 -16-89.4402 162.363   4
   1   0  16 88.0849 173.247   4
   1   0  17 50.6361 121.052   1
  -1   0 -17 45.6178 166.997   2
  -1   0 -17 87.4144 97.6163   4
   1   0  17 168.780 232.324   4
   1   0  18 694.580 290.502   1
  -1   0 -18 275.032 267.546   2
  -1   0 -18 682.738 373.058   4
   1   0  18 497.959 263.511   4
  -1   0 -19 378.441 410.436   2
   1   0  19 38.6631 160.438   1
   1   0  19 568.233 326.998   4
  -1   0 -19 613.264 336.999   4
   1   0  20 60566.4 2607.89   1
  -1   0 -20 69165.7 3746.78   2
  -1   0 -20 64622.4 3369.26   4
   1   0  20 67131.9 3149.90   4
   1   0  21 2015.10 492.606   1
  -1   0 -21 1409.29 646.596   2
   1   0  21 2025.61 658.153   4
  -1   0 -21 902.296 477.684   4
   1   0  22 47372.1 2432.61   1
  -1   0 -22 52299.7 3453.83   2
   1   0  22 50117.6 2843.90   4
  -1   0 -22 48280.4 3085.99   4
   1   0  23 280.142 383.811   1
  -1   0 -23 208.809 232.591   4
  -1   0 -24 4951.09 1046.19   4
   1   0  24 5777.65 1009.61   4
   1   0  25 697.724 393.534   4
  -1   0 -25 213.346 339.440   4
   1   0  26 14791.7 1697.02   4
   1   0  27 167.540 253.730   4
   1   0  28 7223.03 1229.80   4
   1   0  29 738.318 364.546   4
   1   0  30 19370.7 2089.47   4
   1   0  31 866.055 437.137   1
   1   0  31 838.831 626.013   5
   1   0  31 907.315 497.150   4
   1   0  32 5780.50 999.196   1
   1   0  32 7428.16 1736.41   5
   1   0  33 742.364 366.263   1
   1   0  33 72.0134 291.767   5
   1   0  34 1203.65 447.689   1
   1   0  34 1013.20 717.173   5
   1   0  35 1035.10 718.294   5
   1   0  36 3864.63 1384.63   5
   1   0  37 90.0503 323.157   5
   1   0  38 509.522 593.921   5
  -1  -1  38-499.544 637.569   5
  -1   1  38 1333.71 867.303   5
  -1   1  37 1229.51 796.459   5
  -1  -1  37 2000.96 1019.24   5
  -1  -1  36 5001.65 1630.23   5
  -1   1  36 3719.86 1412.64   5
  -1   1  35 6902.39 1762.05   5
  -1  -1  35 5926.47 1671.40   5
  -1   1  34 4770.97 1472.15   5
  -1  -1  34 5163.05 1547.70   5
  -1   1  33-677.757 578.962   5
  -1  -1  33-3431.66 337.329   5
  -1  -1  32 1887.70 941.244   5
  -1   1  32 1549.29 809.627   5
  -1   1  31 1395.60 754.526   5
  -1  -1  31 782.732 616.019   5
  -1   1  31 1242.80 590.524   4
  -1  -1  30 14153.1 2361.21   5
  -1   1  30 15070.0 2345.61   5
  -1   1  30 16074.6 2012.86   4
  -1   1  29 1553.80 754.036   5
  -1  -1  29 1500.82 829.646   5
  -1   1  29 308.114 348.321   4
  -1  -1  28 18261.9 2545.62   5
  -1   1  28 19679.1 2596.17   5
  -1   1  28 19034.1 2126.37   4
  -1   1  27 8693.91 1689.35   5
  -1  -1  27 7899.35 1669.29   5
  -1   1  27 7650.35 1330.02   4
   1   1 -26 5529.59 923.567   1
  -1  -1  26 6238.96 1425.18   5
  -1   1  26 5267.96 1340.76   5
  -1   1  26 4231.26 955.044   4
   1   1 -25 167.619 238.463   1
  -1  -1  25 286.133 501.190   5
  -1   1  25 604.389 443.630   5
   1   1 -25 663.448 373.591   4
  -1   1  25 327.877 326.700   4
   1   1 -24 107.879 184.679   1
  -1   1  24 479.070 417.055   5
  -1  -1  24 517.831 606.803   5
   1   1 -24 37.3954 94.1821   4
  -1   1  24 27.1546 312.349   4
   1   1 -23 7120.83 1016.42   1
  -1  -1  23 9362.23 1617.12   5
  -1   1  23 6770.03 1163.12   4
   1   1 -23 7214.67 1171.69   4
   1   1 -22 1734.70 506.323   1
  -1  -1  22 4013.72 1053.12   5
  -1   1  22 2969.68 775.899   4
   1  -1 -22 2201.35 747.213   4
   1   1 -22 2012.98 592.408   4
   1   1 -21 22930.0 1777.51   1
  -1  -1  21 24311.9 2449.45   5
  -1   1  21 23864.6 2042.79   4
   1   1 -21 23220.3 1981.94   4
   1  -1 -21 23971.2 2245.44   4
   1   1 -20 30811.8 2028.91   1
  -1  -1  20 37290.2 2959.04   5
   1   1 -20 33645.1 2310.81   4
   1  -1 -20 34572.1 2633.13   4
  -1   1  20 34387.6 2405.46   4
   1   1 -19-5.59254 121.216   1
   1  -1 -19 154.930 211.256   4
   1   1 -19 61.0410 228.037   4
   1   1 -18 24206.1 1750.63   1
   1   1 -18 22803.6 1780.32   4
   1  -1 -18 22969.8 2026.69   4
   1   1 -17 21995.6 1647.27   1
   1   1 -17 20443.1 1615.88   4
   1  -1 -17 20985.2 1878.77   4
   1   1 -16 1033.03 350.692   1
   1   1 -16 1437.81 424.884   4
   1  -1 -16 1147.63 435.260   4
   1   1 -15 2402.86 536.106   1
   1  -1 -15 2760.51 635.463   4
   1   1 -15 2214.69 487.379   4
   1   1 -14 7982.29 945.131   1
   1  -1 -14 8482.76 1083.29   4
   1   1 -14 8286.26 916.707   4
   1   1 -13 23703.6 1601.26   1
   1   1 -13 22050.0 1436.24   4
   1  -1 -13 24636.5 1785.02   4
   1   1 -12 25345.3 1625.88   1
   1  -1 -12 25234.1 1739.16   4
   1   1 -12 23580.6 1418.14   4
   1   1 -11 35767.4 1877.28   1
   1   1 -11 39588.3 2267.73   5
   1  -1 -11 36125.6 2001.90   4
   1   1 -10-68.4321 164.971   1
  -1  -1  10-67.3812 244.420   5
   1   1 -10-141.240 243.929   5
   1   1  -9 172965. 3922.54   1
   1   1  -9 170502. 4358.78   5
  -1  -1   9 175246. 4619.52   5
   1  -1  -9 166687. 3974.69   4
   1   1  -8 134757. 3365.89   1
   1   1  -8 134242. 3724.33   5
  -1  -1   8 134466. 3932.71   5
   1  -1  -8 135544. 3381.45   4
  -1   1   8 135284. 3239.28   3
   1   1  -7 8744.65 831.925   1
  -1  -1   7 9229.42 1008.61   5
   1   1  -7 8804.33 927.571   5
  -1   1   7 8006.84 811.810   4
   1  -1  -7 10284.7 918.061   4
  -1   1   7 7522.80 751.391   3
   1   1  -6 50657.2 1930.14   1
  -1  -1   6 51996.7 2281.70   5
   1   1  -6 50782.3 2156.86   5
  -1   1   6 49689.0 1807.38   4
   1  -1  -6 48638.1 1854.32   4
  -1   1   6 50263.6 1888.14   3
   1   1  -5 130326. 2963.18   1
   1  -1  -5 127524. 1722.12   1
   1   1  -5 128054. 3304.81   5
  -1  -1   5 127638. 3450.49   5
  -1   1   5 126041. 2732.99   4
   1  -1  -5 128189. 2834.41   3
  -1   1   5 132541. 2990.85   3
   1  -1  -5 127609. 2805.46   4
   1  -1  -4 9949.28 527.272   1
  -1  -1   4 9893.59 936.422   5
   1   1  -4 9239.43 869.158   5
  -1   1   4 9204.22 763.951   3
  -1   1   4 9133.82 695.375   4
   1  -1  -4 9727.73 727.161   4
   1  -1  -3 142600. 2142.49   1
   1   1  -3 145193. 3376.28   5
  -1  -1   3 145839. 3429.66   5
  -1   1   3 144743. 2997.22   3
  -1  -1   3 147586. 2316.17   3
  -1   1   3 142351. 2505.42   4
   1  -1  -3 142820. 2577.94   4
   1   1  -2 22638.5 939.232   2
   1  -1  -2 21730.6 906.154   1
  -1   1   2 22576.1 891.613   1
  -1  -1   2 21315.4 1288.17   5
   1   1  -2 21811.6 1288.78   5
  -1  -1   2 22055.5 913.888   3
  -1   1   2 21482.4 1132.88   3
  -1   1   2 20686.3 881.429   4
   1  -1  -2 20779.5 902.989   4
   1   1  -1 55035.5 1451.64   2
  -1  -1   1 52341.7 1421.04   2
   1  -1  -1 53303.8 1508.05   1
  -1   1   1 53873.1 1468.85   1
  -1  -1   1 56338.1 2023.58   5
   1   1  -1 54557.9 2006.26   5
  -1   1   1 55551.4 1272.57   4
  -1  -1   1 54976.2 1467.69   3
   1   1  -1 53800.5 1472.19   3
   1  -1  -1 55565.4 1321.34   4
  -1  -1   0 2369.12 319.650   2
   1   1   0 2653.74 331.913   2
  -1   1   0 3059.59 412.145   1
   1   1   0 2791.23 465.537   5
  -1  -1   0 1977.08 368.593   5
   1  -1   0 2462.39 252.065   4
  -1  -1   0 2595.94 338.546   3
  -1   1   0 2696.25 245.825   4
   1   1   0 2449.38 331.778   3
   1   1   1 59774.7 1621.21   2
  -1  -1  -1 54359.6 1550.91   2
  -1   1  -1 60890.7 1743.58   1
   1   1   1 55885.8 1980.02   5
   1   1   1 56317.3 1606.65   3
  -1   1  -2 459056. 4976.57   1
   1   1   2 459382. 4694.93   2
  -1  -1  -2 452667. 4788.08   2
  -1   1  -3 285634. 4095.34   1
  -1  -1  -3 291453. 4025.20   2
   1   1   3 289529. 3997.63   2
  -1   1  -3 295907. 2579.00   2
  -1   1  -4 36252.5 1518.45   1
  -1  -1  -4 32419.2 1428.16   2
   1   1   4 32645.5 1432.41   2
  -1   1  -4 32603.7 1028.18   2
  -1   1  -5 24527.6 1012.61   2
  -1  -1  -5 24437.7 1312.20   2
   1   1   5 24588.2 1327.20   2
  -1   1  -5 24902.4 681.080   4
  -1   1  -6 553993. 6308.48   1
  -1   1  -6 565709. 5272.56   2
   1   1   6 571038. 6642.79   2
  -1  -1  -6 560627. 6605.31   2
  -1   1  -6 563947. 3824.99   4
  -1  -1  -7 83.1660 103.968   2
   1   1   7 160.576 169.204   2
  -1   1  -7 171.785 162.389   2
  -1   1  -7 102.744 90.3842   4
  -1   1  -8 55747.0 2154.91   1
   1  -1   8 58225.6 2254.53   1
  -1  -1  -8 59097.1 2387.71   2
  -1   1  -8 57948.7 1542.17   4
  -1   1  -9 16686.2 1212.84   1
   1  -1   9 17400.2 1289.83   1
  -1  -1  -9 16460.9 1352.61   2
  -1   1  -9 17665.7 943.036   4
   1  -1  10 100232. 3090.84   1
  -1   1 -10 95452.1 2944.04   1
  -1  -1 -10 91498.6 3287.46   2
  -1   1 -10 93378.8 2324.80   4
  -1  -1 -10 100250. 3391.81   4
  -1   1 -11 1530.60 404.031   1
  -1  -1 -11 1345.62 426.735   2
   1  -1  11 1420.04 581.372   1
  -1  -1 -11 859.344 343.692   4
  -1   1 -11 1149.50 294.526   4
   1  -1  12 12834.9 1189.86   1
  -1   1 -12 12507.0 1135.28   1
  -1  -1 -12 14222.6 1370.69   2
  -1   1 -12 12940.1 981.299   4
  -1  -1 -12 12807.8 1300.95   4
   1  -1  13 7518.94 936.524   1
  -1  -1 -13 8010.94 1058.67   2
  -1   1 -13 7495.12 793.178   4
  -1  -1 -13 9056.14 1127.04   4
   1  -1  14 15153.4 1337.75   1
  -1  -1 -14 13515.8 1474.86   2
  -1   1 -14 14287.4 1153.24   4
  -1  -1 -14 14445.5 1469.35   4
   1  -1  15 497.223 325.167   1
  -1  -1 -15 709.636 277.407   2
  -1  -1 -15 327.560 270.868   4
  -1   1 -15 618.877 284.992   4
   1  -1  16 4025.90 738.545   1
  -1  -1 -16 4983.87 932.565   2
  -1  -1 -16 4877.98 921.203   4
  -1   1 -16 5043.73 752.518   4
   1   1  17 5873.03 601.031   1
  -1  -1 -17 5598.40 1045.28   2
  -1   1 -17 5296.42 802.424   4
   1   1  17 6822.19 1061.97   4
  -1  -1 -17 5251.01 975.033   4
  -1  -1 -18 4299.55 944.023   2
   1   1  18 2970.81 455.933   1
  -1   1 -18 5154.07 818.932   4
  -1  -1 -18 5117.84 987.793   4
   1   1  18 4320.18 888.682   4
  -1   1 -19 2175.74 657.181   2
   1   1  19 1950.20 392.091   1
  -1  -1 -19 1547.80 628.722   2
   1   1  19 1933.29 609.982   4
  -1  -1 -19 2654.61 738.854   4
  -1   1 -19 1971.48 543.079   4
   1   1  20 15683.6 1084.80   1
  -1   1 -20 16587.4 1819.16   2
  -1  -1 -20 17116.1 1969.20   2
   1   1  20 16537.0 1729.88   4
  -1  -1 -20 18081.9 1928.80   4
  -1   1 -20 16312.4 1571.08   4
  -1   1 -21 6720.10 1174.67   2
   1   1  21 5644.30 675.986   1
  -1  -1 -21 6607.15 1239.42   2
  -1   1 -21 6584.56 1038.42   4
   1   1  21 6934.89 1149.05   4
  -1  -1 -21 5510.75 1098.71   4
  -1   1 -22 8996.67 1416.01   2
   1   1  22 8675.44 866.936   1
   1  -1  22 9682.82 1585.60   5
   1   1  22 8941.11 1311.53   4
  -1  -1 -22 11067.9 1598.00   4
  -1   1 -22 9834.78 1306.47   4
  -1   1 -23 17188.5 2007.60   2
   1   1  23 15069.8 1137.64   1
   1  -1  23 17177.6 1730.33   1
   1  -1  23 17456.0 2196.34   5
   1   1  23 15885.1 1808.65   4
  -1   1 -23 14135.7 1629.44   4
   1   1  24 30732.1 1658.26   1
   1  -1  24 29336.1 2301.30   1
   1  -1  24 29162.3 2859.59   5
  -1   1 -24 30748.4 2450.59   4
   1   1  24 31977.8 2611.92   4
   1  -1  25 817.800 472.812   1
   1   1  25 403.240 264.569   1
   1  -1  25 874.324 664.308   5
   1   1  25 615.201 507.272   4
  -1   1 -25 350.891 307.366   4
   1   1  26 5477.52 726.261   1
   1  -1  26 6130.22 1085.74   1
   1  -1  26 5695.70 1340.46   5
   1   1  26 5722.18 1174.03   4
  -1   1 -26 6475.15 1190.93   4
   1   1  27 7747.48 865.110   1
   1  -1  27 7211.15 1191.13   1
   1  -1  27 6714.30 1468.68   5
  -1   1 -27 6407.60 1227.67   4
   1   1  27 8306.78 1397.53   4
   1  -1  28 1908.60 619.673   1
   1   1  28 1117.18 341.876   1
   1  -1  28 2186.25 887.141   5
   1   1  28 2076.11 728.157   4
   1   1  29 12874.0 1126.81   1
   1  -1  29 12853.8 1607.06   1
   1  -1  29 14776.1 2274.86   5
   1   1  29 12828.5 1813.28   4
   1  -1  30 398.189 324.635   1
   1   1  30 80.6796 172.289   1
   1   1  30 464.028 510.290   4
   1   1  31 1363.67 376.601   1
   1  -1  31 2421.99 711.427   1
   1   1  31 1749.94 713.888   4
   1  -1  32 2491.97 778.619   1
   1  -1  32 1980.96 1017.49   5
   1   1  32 2682.91 916.517   4
   1  -1  33 2990.53 841.884   1
   1  -1  33 3562.98 1337.08   5
   1   1  33 3153.29 982.198   4
   1  -1  34 950.801 464.529   1
   1  -1  34 1363.91 785.611   5
   1   1  34 339.091 346.695   4
   1  -1  35-143.091 317.982   5
   1   1  35 456.587 642.948   5
   1   1  35 406.786 417.391   4
   1   1  36-33.0471 316.494   5
   1  -1  36-58.2439 370.251   5
   1   1  36 474.538 410.325   4
   1  -1  37 1109.33 799.383   5
   1   1  37 863.582 680.955   5
   1   1  37 611.705 508.161   4
   1  -1  38 2035.10 1047.35   5
   1   1  38 3106.82 979.718   4
  -1   2  37 1871.22 980.226   5
  -1  -2  37 660.730 713.157   5
  -1   2  37 1687.73 811.848   4
  -1  -2  36-1375.85 893.166   5
  -1   2  36-901.573 713.243   5
  -1   2  36 442.590 404.315   4
  -1   2  35 1528.93 882.296   5
  -1  -2  35 656.555 631.815   5
  -1   2  35-400.217 375.947   4
  -1   2  34 271.630 463.299   5
  -1  -2  34-729.465 705.922   5
  -1   2  34 301.331 514.202   4
  -1   2  33 2541.90 1045.67   5
  -1  -2  33 3686.34 1350.61   5
  -1   2  33 2901.79 990.869   4
  -1  -2  32 3799.56 1403.42   5
  -1   2  32 4505.99 1352.94   5
  -1   2  32 4655.69 1210.41   4
  -1  -2  31 3365.15 1194.69   5
  -1   2  31 3399.41 1141.52   5
  -1   2  31 2887.16 972.263   4
  -1   2  30 1527.17 757.248   5
  -1  -2  30 1342.37 791.311   5
  -1   2  30 1843.78 772.823   4
  -1  -2  29 351.993 294.937   5
  -1   2  29-84.8203 388.644   5
  -1   2  29-385.176 373.307   4
  -1  -2  28 1370.99 758.282   5
  -1   2  28 1530.04 634.567   4
  -1  -2  27 4507.34 1283.76   5
  -1   2  27 3427.01 951.586   4
   1   2 -26 11.1097 145.614   1
  -1  -2  26-335.309 462.307   5
   1   2 -26 107.499 212.873   4
   1   2 -25 15591.9 1826.96   1
  -1  -2  25 15406.5 2277.26   5
   1   2 -25 17233.1 1863.76   4
  -1   2  25 16551.2 2012.00   4
   1   2 -24 8490.81 1357.98   1
  -1  -2  24 9510.14 1775.49   5
  -1   2  24 10878.2 1603.76   4
   1   2 -24 8434.93 1279.84   4
   1   2 -23 39779.7 2905.97   1
  -1  -2  23 41015.6 3559.59   5
  -1   2  23 38048.9 2930.93   4
   1   2 -23 38207.6 2634.28   4
   1   2 -22 9365.15 1387.79   1
  -1  -2  22 9757.69 1740.30   5
   1   2 -22 9456.37 1273.38   4
  -1   2  22 11302.9 1573.31   4
   1   2 -21 78.4392 180.621   1
  -1  -2  21 257.759 408.051   5
   1   2 -21 237.155 227.807   4
  -1   2  21 171.571 287.153   4
   1   2 -20 7278.97 1196.31   1
  -1  -2  20 7851.69 1484.99   5
   1  -2 -20 8960.14 1448.12   4
  -1   2  20 7459.80 1228.57   4
   1   2 -20 6760.80 1001.78   4
  -1   2  19 3475.64 829.139   3
   1   2 -19 2579.28 709.756   1
  -1  -2  19 2114.68 762.172   5
   1   2 -19 2809.44 646.625   4
   1  -2 -19 3257.24 867.898   4
  -1   2  19 4239.06 937.861   4
   1   2 -18 32822.7 2452.79   1
  -1  -2  18 33850.7 2867.24   5
   1  -2 -18 33087.6 2635.76   4
   1   2 -18 31584.9 2022.84   4
  -1   2  18 34449.8 2521.64   4
  -1   2  18 35375.1 2563.59   3
  -1   2  17 27.2158 224.965   3
   1   2 -17 85.5900 149.499   1
  -1  -2  17 306.706 436.712   5
   1   2 -17 181.878 177.579   4
   1  -2 -17 79.0357 211.163   4
   1   2 -16 17780.7 1766.51   1
  -1  -2  16 19192.0 2085.32   5
   1  -2 -16 19734.9 1935.01   4
  -1   2  16 22025.9 1962.67   3
   1   2 -15 9153.40 1247.52   1
  -1  -2  15 9788.16 1459.95   5
  -1   2  15 9842.07 1296.09   3
   1  -2 -15 9239.42 1287.58   4
   1   2 -14 11984.1 1402.79   1
  -1  -2  14 10831.2 1482.33   5
  -1   2  14 11297.3 1351.42   3
   1  -2 -14 11214.9 1376.76   4
  -1   2  13 824.269 370.061   3
   1   2 -13 578.973 313.118   1
   1   2 -13 1308.38 436.908   5
  -1  -2  13 511.381 330.641   5
   1  -2 -13 1082.90 420.632   4
   1   2 -12 35226.0 2348.22   1
   1   2 -12 32301.0 2285.76   5
  -1  -2  12 35249.7 2530.41   5
  -1   2  12 33154.7 2224.68   3
   1  -2 -12 32576.1 2217.89   4
  -1   2  11 422.832 207.275   3
   1   2 -11 463.034 331.987   1
   1   2 -11 485.267 265.236   5
  -1  -2  11 479.405 412.054   5
   1  -2 -11 166.261 199.925   4
  -1   2  10 4345.68 385.651   1
   1   2 -10 4272.25 784.982   1
   1   2 -10 3855.81 785.447   5
  -1  -2  10 4601.06 909.035   5
  -1   2  10 4304.23 786.954   3
  -1   2  10 4876.74 784.238   4
   1  -2 -10 4985.60 821.335   4
   1   2  -9 4822.49 807.481   1
  -1   2   9 4851.28 445.378   1
  -1  -2   9 4562.90 869.368   5
   1   2  -9 5377.79 870.378   5
  -1   2   9 5954.56 895.019   3
  -1   2   9 5784.43 840.257   4
   1  -2  -9 4777.36 787.554   4
   1   2  -8 17622.3 1542.09   1
  -1   2   8 16878.5 883.706   1
   1   2  -8 17112.9 1509.70   5
  -1  -2   8 16401.9 1588.66   5
  -1   2   8 15758.6 1315.04   4
   1  -2  -8 17217.2 1429.84   4
  -1   2   8 16793.5 1490.13   3
  -1   2   7 14166.2 871.361   1
   1   2  -7 13571.3 1319.79   1
  -1  -2   7 14352.5 1450.17   5
   1   2  -7 15606.8 1403.45   5
   1  -2  -7 15192.2 1301.37   4
  -1   2   7 14338.4 1216.41   4
  -1   2   7 14594.0 1355.22   3
   1  -2  -6 31609.2 1361.52   1
  -1   2   6 30902.1 1334.09   1
   1   2  -6 31913.4 1979.25   1
  -1  -2   6 31243.7 2045.34   5
   1   2  -6 30679.7 1927.54   5
  -1   2   6 31998.8 1756.44   4
  -1   2   6 29613.5 1898.01   3
   1  -2  -6 31162.0 1799.35   4
   1   2  -5 25892.9 1251.04   2
   1  -2  -5 25193.3 1242.19   2
  -1   2   5 26622.5 1299.96   1
   1  -2  -5 28499.6 1356.78   1
   1   2  -5 27451.6 1787.92   1
  -1  -2   5 27110.7 1881.87   5
   1   2  -5 25865.8 1743.87   5
  -1   2   5 26287.1 1538.82   4
  -1   2   5 24723.1 1712.85   3
  -1  -2   5 24207.8 1437.85   3
   1   2  -4 7775.37 667.040   2
   1  -2  -4 7322.64 611.272   2
  -1   2   4 7872.94 745.940   1
   1   2  -4 8168.50 960.079   1
   1  -2  -4 7400.82 720.479   1
  -1  -2   4 7509.23 992.057   5
   1   2  -4 7298.28 925.426   5
  -1   2   4 7287.13 793.067   4
  -1  -2   4 7303.98 795.934   3
  -1   2   4 6894.43 901.575   3
   1  -2  -3 23979.1 1004.41   2
   1   2  -3 25052.0 1161.65   2
  -1   2   3 24541.7 1350.96   1
   1  -2  -3 25736.7 1400.83   1
   1   2  -3 24476.5 1627.57   1
  -1  -2   3 23888.2 1697.88   5
   1   2  -3 23808.7 1656.58   5
  -1   2   3 23991.0 1651.00   3
  -1  -2   3 24369.1 1440.21   3
  -1   2   3 24199.9 1363.89   4
   1   2  -2 5352.71 534.810   2
   1  -2  -2 5239.59 413.676   2
  -1  -2   2 5397.71 537.031   2
   1  -2  -2 5011.60 651.187   1
  -1   2   2 5710.53 681.968   1
   1   2  -2 5293.99 753.510   1
  -1   2   2 5324.52 483.004   5
  -1  -2   2 4741.33 745.062   5
   1   2  -2 5147.14 776.034   5
  -1   2   2 4951.46 590.312   4
  -1  -2   2 5108.92 669.265   3
  -1  -2   1 2160.42 344.116   2
  -1  -2   1 2165.99 459.668   3
   1  -2  -1 2354.75 226.431   2
   1   2  -1 2599.28 381.238   2
   1   2  -1 2402.97 484.937   1
  -1   2   1 1971.27 429.743   1
   1  -2  -1 2540.56 477.171   1
   1   2  -1 2024.53 486.253   5
  -1   2   1 2508.46 301.050   5
  -1  -2   1 1699.68 429.663   5
  -1   2   1 2489.56 412.672   4
   1   2  -1 2378.75 476.026   3
  -1  -2   0 39387.7 1468.86   2
   1   2   0 42240.3 1561.16   2
   1   2   0 39627.0 1913.54   1
  -1   2   0 38645.0 1849.12   1
   1  -2   0 43073.3 1967.72   1
   1   2   0 38572.8 2109.73   5
  -1   2   0 41493.1 1152.24   5
  -1   2   0 38409.2 1496.83   4
   1   2   0 40139.9 1932.77   3
  -1  -2   0 40400.3 1899.14   3
  -1  -2  -1 12025.4 850.988   2
   1   2   1 12863.9 886.169   2
  -1   2  -1 12984.1 1112.28   1
   1  -2   1 12144.7 1080.35   1
  -1   2  -1 13008.5 635.712   5
   1  -2   1 13164.3 680.722   5
   1   2   1 13758.0 1248.91   5
  -1  -2  -1 13074.8 1091.36   3
   1   2   1 12370.9 1099.89   3
   1   2   2 648.225 287.735   3
  -1  -2  -2 520.650 207.202   2
  -1  -2  -2 513.645 312.118   3
  -1   2  -2 959.014 367.659   1
   1  -2   2 796.198 405.069   1
   1   2   2 832.726 253.899   2
  -1   2  -2 845.051 181.072   5
   1  -2   2 703.452 190.553   5
   1   2   2 494.464 258.617   5
   1   2   3 39094.7 1667.46   2
  -1  -2  -3 38992.4 1681.32   2
  -1   2  -3 43404.2 2119.58   1
   1  -2   3 45052.0 2228.22   1
   1  -2   3 40238.8 1474.29   5
  -1   2  -3 39928.3 1299.79   5
   1   2   3 39808.6 2044.87   3
   1   2   4 146807. 3437.30   2
  -1  -2  -4 145179. 3381.98   2
  -1   2  -4 142978. 3931.70   1
   1  -2   4 145812. 3025.47   5
   1   2   4 149761. 3988.11   3
  -1   2  -5 12247.2 571.517   2
   1   2   5 12000.8 1019.74   2
  -1  -2  -5 11772.3 999.318   2
  -1   2  -5 12755.2 1222.18   1
   1  -2   5 11720.3 914.907   5
   1   2   5 11816.3 1135.71   3
   1   2   6 6803.52 795.013   2
  -1   2  -6 6277.37 486.708   2
  -1  -2  -6 6160.11 755.831   2
  -1   2  -6 6281.80 864.390   1
   1  -2   6 5893.85 698.041   5
   1   2   6 6633.18 876.618   3
  -1  -2  -7 100727. 3227.32   2
   1   2   7 100257. 3192.55   2
  -1   2  -7 102827. 3548.92   1
   1  -2   7 101548. 3023.20   5
   1   2   7 105552. 3543.40   3
   1   2   8 343.603 262.944   3
   1  -2   8 37.4406 142.613   5
  -1  -2  -8 81.1795 171.281   2
   1   2   8 143.702 231.200   2
  -1   2  -8 3.19440 231.573   1
  -1  -2  -9 25051.9 1739.80   2
  -1   2  -9 24443.9 1791.38   1
   1  -2   9 24975.8 1659.71   5
  -1   2 -10 3946.33 735.575   1
  -1  -2 -10 3622.40 680.599   2
   1  -2  10 3590.35 674.894   5
  -1   2 -10 3852.60 429.418   4
  -1  -2 -11 38955.1 2329.39   2
  -1   2 -11 39749.9 2355.74   1
   1  -2  11 39967.9 2293.68   5
  -1   2 -11 40678.3 1498.05   4
  -1  -2 -12 22851.1 1853.73   2
  -1   2 -12 23185.4 1822.21   1
   1  -2  12 23525.7 1813.23   5
  -1   2 -12 22543.3 1187.71   4
  -1  -2 -13 26097.8 2034.96   2
  -1   2 -13 26245.8 1986.29   1
   1  -2  13 25757.5 1958.04   5
  -1   2 -13 26469.7 1354.91   4
  -1  -2 -14 10058.6 1313.07   2
  -1   2 -14 8867.60 1183.60   1
   1  -2  14 8181.66 1157.03   5
  -1   2 -14 8929.20 837.460   4
  -1  -2 -15 14538.4 1620.10   2
  -1   2 -15 16097.5 1604.45   1
   1  -2  15 14854.1 1585.68   1
   1  -2  15 13632.8 1567.26   5
  -1   2 -15 16277.5 1177.01   4
  -1   2 -16 156.177 253.567   1
  -1  -2 -16 366.945 303.677   2
   1  -2  16 447.693 380.792   1
   1  -2  16 577.492 382.257   5
  -1   2 -16-44.1188 116.453   4
  -1   2 -17 2088.92 639.521   1
  -1  -2 -17 2846.01 775.207   2
   1  -2  17 3001.05 787.334   1
   1  -2  17 2769.48 750.089   5
  -1   2 -17 2230.97 483.393   4
  -1  -2 -18 14761.4 1787.70   2
  -1   2 -18 12537.3 1499.91   1
   1  -2  18 14529.9 1667.38   1
   1  -2  18 14450.4 1738.87   5
   1   2  18 13768.1 1665.76   4
  -1   2 -18 13511.8 1242.16   4
  -1  -2 -19 8994.49 1417.77   2
   1  -2  19 7312.19 1215.20   1
  -1   2 -19 7170.09 1148.41   1
   1  -2  19 7895.10 1309.33   5
  -1   2 -19 7250.56 942.508   4
   1   2  19 6979.13 1218.79   4
  -1  -2 -20 13814.5 1805.30   2
  -1   2 -20 15136.5 1689.30   1
   1  -2  20 14195.6 1700.69   1
   1  -2  20 15076.0 1873.52   5
  -1   2 -20 13910.7 1361.42   4
   1   2  20 16568.3 1891.22   4
   1  -2  21 877.214 461.882   1
   1   2  21 1336.77 265.952   1
  -1   2 -21 2055.45 660.886   2
   1  -2  21 1612.76 649.308   5
  -1   2 -21 1512.61 473.017   4
   1   2  21 810.480 548.576   4
   1   2  22 317.824 135.685   1
   1  -2  22-209.582 288.904   1
  -1   2 -22 394.969 278.152   2
   1  -2  22 123.002 244.197   5
   1   2  22 441.796 390.446   4
  -1   2 -22 649.928 352.144   4
   1  -2  23 184.321 284.341   1
  -1   2 -23-71.3127 273.785   2
   1   2  23 122.264 103.764   1
   1  -2  23-388.923 386.681   5
   1   2  23-60.6458 271.915   4
  -1   2 -23 168.752 171.655   4
  -1   2 -24 4014.40 979.419   2
   1  -2  24 3888.97 940.809   1
   1   2  24 4416.23 439.444   1
   1  -2  24 3617.75 1036.84   5
   1   2  24 5292.75 1173.89   4
  -1   2 -24 4705.86 918.290   4
   1   2  25 3569.01 380.274   1
   1  -2  25 2325.06 743.801   1
   1  -2  25 2800.53 930.113   5
  -1   2 -25 3476.09 810.298   4
   1   2  25 3093.00 958.846   4
   1   2  26 93.7517 74.0229   1
   1  -2  26 202.961 346.734   1
   1  -2  26 530.987 479.145   5
   1   2  26 365.100 387.017   4
  -1   2 -26 956.510 433.356   4
   1  -2  27 12259.3 1737.42   1
   1  -2  27 9160.43 1791.83   5
  -1   2 -27 10153.5 1469.49   4
   1   2  27 12682.6 1862.18   4
   1  -2  28 8042.77 1419.75   1
   1  -2  28 10071.3 1863.22   5
  -1   2 -28 8220.68 1344.18   4
   1   2  28 11100.0 1791.63   4
   1  -2  29 4895.34 1110.74   1
   1  -2  29 4973.43 1436.12   5
   1   2  29 4174.37 1153.66   4
   1  -2  30 3906.47 1021.96   1
   1  -2  30 3134.61 1145.31   5
   1   2  30 3402.20 1014.04   4
   1  -2  31-22.5556 190.945   1
   1  -2  31 1327.15 769.961   5
   1   2  31 631.735 553.555   4
   1  -2  32 467.364 411.466   1
   1  -2  32 980.577 717.999   5
   1   2  32 1206.49 644.056   4
   1  -2  33 621.314 523.308   1
   1  -2  33 846.423 711.729   5
   1   2  33 400.380 404.320   4
   1  -2  34 2.34924 191.677   1
   1  -2  34 401.696 535.577   5
   1   2  34 31.5891 177.397   4
   1  -2  35 3624.69 1310.29   5
   1   2  35 1647.61 763.934   4
   1  -2  36 1445.98 876.977   5
   1   2  36 2373.39 942.559   4
   1  -2  37 740.691 646.580   5
   1   2  37 435.663 528.561   4
  -1  -3  36 982.264 812.144   5
  -1   3  36 565.700 525.464   5
  -1  -3  35 23.6556 362.959   5
  -1   3  35 2629.87 1157.96   5
  -1  -3  34-250.562 494.769   5
  -1   3  34 971.725 718.673   5
  -1   3  34 309.765 353.445   4
  -1   3  33 237.239 355.762   5
  -1  -3  33 249.945 460.115   5
  -1   3  33 892.600 590.422   4
  -1   3  32 1839.69 792.505   5
  -1  -3  32 2876.10 1238.50   5
  -1   3  32 2239.14 884.325   4
  -1   3  31 644.904 502.855   5
  -1  -3  31 60.4893 279.743   5
  -1   3  31-589.171 483.152   4
  -1  -3  30 1958.05 976.602   5
  -1   3  30 1144.11 619.386   4
  -1  -3  29 2493.19 1024.03   5
  -1   3  29 1929.43 803.706   4
  -1  -3  28 374.766 503.771   5
  -1   3  28 220.961 367.313   4
  -1  -3  27 2623.48 1077.19   5
  -1   3  27 3088.88 975.563   4
  -1  -3  26 8765.52 1832.60   5
  -1   3  26 8582.85 1580.52   4
   1   3 -26 8329.78 1300.56   4
  -1  -3  25-140.999 481.789   5
   1   3 -25 248.497 233.211   4
  -1   3  25 63.3744 277.888   4
  -1  -3  24 353.479 434.488   5
  -1   3  24 1536.47 610.654   4
   1   3 -24 616.483 348.166   4
   1   3 -23-88.8508 155.174   4
  -1   3  23-46.2051 258.310   4
  -1  -3  22 153.247 341.272   5
  -1   3  22 401.440 405.722   4
   1   3 -22 507.957 286.158   4
  -1  -3  21 12277.3 1997.92   5
  -1   3  21 15333.5 1921.83   4
   1   3 -21 12402.0 1397.91   4
   1  -3 -20 2543.89 792.106   2
  -1  -3  20 3736.93 1149.18   5
   1   3 -20 2888.88 644.001   4
  -1   3  20 3544.51 922.934   4
   1  -3 -19 899.528 439.134   2
  -1  -3  19 1251.99 638.716   5
   1   3 -19 942.769 387.273   4
  -1   3  19 515.191 465.259   4
   1  -3 -18 7613.13 1277.39   2
  -1  -3  18 8376.90 1565.85   5
  -1   3  18 6897.83 1244.66   4
   1  -3 -17 569.548 352.365   2
   1   3 -17 905.633 446.811   1
  -1  -3  17 1129.40 601.812   5
   1  -3 -17 679.511 404.268   4
  -1   3  17 345.137 315.884   4
  -1   3  16 1626.77 639.914   3
   1  -3 -16 1589.41 547.624   2
   1   3 -16 1076.46 499.113   1
  -1  -3  16 1978.23 758.061   5
  -1   3  16 1770.00 667.341   4
   1  -3 -16 2322.76 725.445   4
  -1   3  15 2251.83 738.796   3
   1   3 -15 2657.46 782.245   1
   1  -3 -15 1961.12 612.474   2
  -1  -3  15 2313.57 784.350   5
   1   3 -15 2479.68 716.393   5
  -1   3  15 3011.17 768.509   4
  -1   3  14 920.248 442.511   3
   1   3 -14 756.889 463.686   1
  -1   3  14 1016.47 227.632   1
   1  -3 -14 802.049 348.616   2
  -1  -3  14 1902.58 802.321   5
   1   3 -14 986.232 449.835   5
  -1   3  14 1294.56 550.802   4
  -1   3  13 2539.41 795.152   3
  -1   3  13 3161.44 423.193   1
   1   3 -13 3508.50 855.994   1
   1  -3 -13 3110.51 702.979   2
   1   3 -13 3321.70 783.349   5
  -1  -3  13 2587.32 796.858   5
  -1   3  13 2684.26 708.646   4
  -1   3  12 113.598 234.678   3
  -1   3  12 36.5247 75.3682   1
   1   3 -12 89.4207 197.383   1
   1  -3 -12 75.2453 132.240   2
  -1  -3  12-574.312 395.145   5
   1   3 -12 13.7219 164.467   5
  -1   3  12-310.852 358.933   4
   1  -3 -11 7332.72 996.197   2
  -1   3  11 6742.53 697.839   1
   1   3 -11 6516.98 1164.77   1
   1   3 -11 7625.73 1151.85   5
  -1  -3  11 7741.27 1295.13   5
  -1   3  11 7126.62 1196.15   3
  -1   3  11 7556.08 1132.90   4
   1  -3 -10 5303.07 814.894   2
   1   3 -10 5076.19 1007.99   1
  -1   3  10 5029.29 644.279   1
   1   3 -10 5132.99 936.541   5
  -1  -3  10 4245.78 953.926   5
  -1   3  10 6770.67 1142.01   3
   1   3  -9 226.502 177.846   2
  -1   3   9 426.671 331.374   3
   1   3  -9 723.007 389.452   1
   1  -3  -9 461.759 233.288   2
  -1   3   9 507.889 226.851   1
  -1  -3   9 435.407 366.945   5
   1   3  -9 630.682 357.131   5
   1  -3  -8 56099.3 2390.34   2
   1   3  -8 56172.7 2129.43   2
  -1   3   8 54525.4 2245.59   1
   1   3  -8 61148.1 3373.76   1
   1   3  -8 55219.9 2955.98   5
  -1  -3   8 58788.1 3321.56   5
  -1   3   8 59669.6 3326.65   3
   1  -3  -7 35954.5 1818.19   2
   1   3  -7 33783.6 1591.71   2
  -1   3   7 35216.1 1855.99   1
   1   3  -7 40510.9 2719.95   1
   1   3  -7 34456.5 2313.91   5
  -1  -3   7 36892.3 2588.96   5
  -1  -3   7 35918.3 2213.09   3
  -1   3   7 36158.9 2559.82   3
   1   3  -6 300.117 153.738   2
  -1   3   6 1210.86 384.920   1
   1   3  -6 892.227 467.631   1
   1  -3  -6 1218.23 309.727   2
   1   3  -6 519.855 257.739   5
  -1  -3   6 352.865 341.745   5
  -1  -3   6 470.748 297.457   3
  -1   3   6 1009.79 439.386   3
  -1   3   6 1161.67 459.595   4
   1  -3  -5 43304.3 1786.22   2
   1   3  -5 45197.9 1780.55   2
  -1   3   5 44969.1 2215.73   1
   1   3  -5 46400.8 2835.40   1
  -1  -3   5 49532.0 2879.35   5
   1   3  -5 45305.1 2609.71   5
  -1  -3   5 47824.4 2533.27   3
  -1   3   5 48892.7 2909.09   3
  -1   3   5 45704.0 2375.71   4
   1   3  -4-415.106 194.902   2
  -1  -3   4-247.095 309.873   3
   1  -3  -4 124.848 133.265   2
  -1   3   4 447.152 290.837   1
   1  -3  -4-359.737 247.336   1
   1   3  -4 118.192 244.167   1
  -1  -3   4-797.308 421.586   5
   1   3  -4 6.32020 258.980   5
  -1   3   4-19.4157 129.938   5
  -1   3   4 125.550 231.633   4
   1   3  -3 21874.2 1208.18   2
   1  -3  -3 20765.1 1019.49   2
   1   3  -3 22316.5 1894.13   1
  -1   3   3 22252.7 1639.48   1
   1  -3  -3 22839.3 1635.87   1
   1   3  -3 21915.3 1814.46   5
  -1   3   3 22176.8 1342.25   5
  -1  -3   3 22025.7 1827.76   5
  -1   3   3 22240.9 1573.80   4
  -1  -3   3 20629.7 1675.25   3
   1  -3  -2 29779.5 1069.62   2
   1   3  -2 29705.3 1430.21   2
   1   3  -2 31736.6 2228.32   1
   1  -3  -2 30958.5 1939.08   1
  -1   3   2 29349.6 1920.41   1
  -1   3   2 30388.3 1497.36   5
  -1  -3   2 30205.7 2100.56   5
   1   3  -2 28858.1 2078.97   5
  -1   3   2 33023.5 1860.59   4
   1   3  -1 7809.15 744.905   2
  -1  -3   1 8909.96 779.170   2
   1  -3  -1 8868.72 477.461   2
   1   3  -1 8840.40 1166.99   1
   1  -3  -1 10364.6 1152.37   1
  -1   3   1 9287.17 1100.62   1
  -1   3   1 10071.6 826.944   5
   1   3  -1 7289.69 1061.69   5
  -1   3   1 10186.0 1010.47   4
  -1  -3   0-104.472 109.311   2
   1   3   0-143.099 183.694   2
  -1   3   0 228.746 249.004   1
   1   3   0-20.8453 177.352   1
   1  -3   0-332.215 250.159   1
   1   3   0-94.0369 190.238   5
  -1   3   0-351.570 167.110   5
  -1   3   0-93.7620 174.137   4
   1   3   0-322.343 245.233   3
   1   3   1 10098.6 894.154   2
  -1  -3  -1 9049.67 825.041   2
  -1   3  -1 9508.69 1148.56   1
   1   3   1 10379.7 1214.89   1
   1  -3   1 8709.12 1107.36   1
   1   3   1 8812.44 1176.63   5
  -1   3  -1 9504.11 752.459   5
  -1   3  -1 9319.68 928.140   4
   1   3   1 8959.02 1158.76   3
  -1  -3  -2-141.006 136.762   2
  -1   3  -2 215.699 229.008   1
   1  -3   2 168.988 240.985   1
   1   3   2 17.9419 170.422   2
   1   3   2 59.6675 158.976   1
   1   3   2-199.825 237.051   5
  -1   3  -2-65.0942 116.421   5
   1   3   2-420.948 279.609   3
   1   3   3 29069.1 1648.51   2
  -1  -3  -3 27938.6 1567.38   2
   1  -3   3 30597.9 2139.79   1
   1   3   3 29035.5 1949.86   1
  -1   3  -3 30143.9 2138.87   1
   1   3   3 27714.7 2133.34   5
  -1   3  -3 29260.5 1353.89   5
   1  -3   3 31185.1 1561.97   5
   1   3   3 28479.7 2118.49   3
  -1  -3  -4 8384.62 893.615   2
   1   3   4 8538.20 933.420   2
   1   3   4 8293.76 1025.64   1
  -1   3  -4 8284.42 1145.87   1
  -1   3  -4 8833.96 777.741   5
   1   3   4 8963.80 1226.81   5
   1  -3   4 9207.06 922.187   5
   1   3   4 8707.50 1197.04   3
   1   3   5 104.218 195.664   3
  -1  -3  -5 24.5346 119.394   2
  -1   3  -5 238.212 222.919   1
   1   3   5 54.7859 158.639   2
   1   3   5 566.119 282.389   1
  -1   3  -5 261.166 144.650   5
   1  -3   5 198.304 181.073   5
   1   3   5 139.812 203.390   5
  -1  -3  -6 4388.89 706.670   2
   1   3   6 3992.46 846.182   3
   1   3   6 4621.00 727.405   2
  -1   3  -6 4210.78 828.639   1
   1   3   6 3624.50 659.047   1
   1  -3   6 2236.75 479.161   5
  -1  -3  -7 23887.7 1704.84   2
   1   3   7 24491.5 1705.05   2
  -1   3  -7 26652.2 891.985   2
  -1   3  -7 24286.3 812.752   2
   1   3   7 24732.7 1681.37   1
  -1   3  -7 27348.3 2165.33   1
   1  -3   7 24289.3 1723.24   5
   1   3   7 25940.7 2155.41   3
  -1   3  -8 12274.1 713.975   2
  -1  -3  -8 11640.4 1231.74   2
   1   3   8 12380.7 1174.06   1
  -1   3  -8 12938.0 1527.50   1
   1  -3   8 12572.5 1271.66   5
   1   3   8 13615.2 1571.79   3
   1   3   9-123.256 177.565   3
   1   3   9 223.018 197.018   1
  -1   3  -9 117.821 187.543   1
  -1   3  -9 220.267 139.083   2
  -1  -3  -9-30.2173 215.152   2
   1  -3   9-98.1559 174.744   5
   1   3   9-350.409 302.825   4
  -1  -3 -10 6004.85 942.166   2
   1   3  10 6540.52 821.992   1
  -1   3 -10 7758.67 1226.52   1
   1  -3  10 7332.30 1072.47   5
   1   3  10 6855.11 1150.52   4
   1   3  10 6577.39 1149.00   3
  -1  -3 -11 22310.7 1870.57   2
   1   3  11 22295.7 1486.79   1
  -1   3 -11 21761.3 2069.99   1
   1  -3  11 22202.2 1898.11   5
   1   3  11 25317.5 2252.77   3
   1   3  11 21814.9 2026.95   4
  -1  -3 -12 6123.74 1015.33   2
   1   3  12 6953.35 812.617   1
  -1   3 -12 5574.93 1069.35   1
   1  -3  12 6421.81 1067.76   5
   1   3  12 7102.84 1182.80   4
   1   3  12 8098.78 1290.69   3
   1   3  13 383.868 302.281   3
  -1  -3 -13 563.457 343.299   2
  -1   3 -13 965.627 444.024   1
   1  -3  13 335.977 319.858   1
   1   3  13 529.842 222.327   1
   1  -3  13 225.910 265.215   5
   1   3  13 1124.29 545.591   4
   1   3  14 5.52294 174.456   3
   1   3  14 342.056 199.420   1
  -1  -3 -14 187.671 208.438   2
   1  -3  14-105.175 229.802   1
  -1   3 -14 378.650 326.105   1
   1  -3  14-251.360 289.496   5
  -1   3 -14 317.083 168.070   4
   1   3  14-256.464 301.534   4
  -1  -3 -15 14721.7 1702.09   2
   1   3  15 14502.9 1107.56   1
  -1   3 -15 14409.9 1733.34   1
   1  -3  15 13392.1 1719.46   1
   1  -3  15 15166.2 1772.48   5
   1   3  15 14293.3 1788.54   3
  -1   3 -15 13576.5 1050.03   4
   1   3  15 12594.4 1654.93   4
   1  -3  16 171.446 259.941   1
   1   3  16 715.395 245.203   1
  -1  -3 -16 1121.34 509.631   2
  -1   3 -16 713.142 392.789   1
   1  -3  16 392.859 333.027   5
  -1   3 -16 727.600 271.563   4
   1   3  16 969.350 500.652   4
   1  -3  17 3689.33 937.587   1
   1   3  17 5047.57 624.964   1
  -1   3 -17 3715.04 731.741   2
  -1  -3 -17 3712.12 915.025   2
   1  -3  17 3975.21 969.305   5
   1   3  17 3945.90 973.094   4
  -1   3 -17 4990.46 702.044   4
  -1  -3 -18 9658.29 1481.97   2
   1   3  18 9459.86 820.454   1
  -1   3 -18 9008.66 1173.90   2
   1  -3  18 8411.34 1419.48   1
   1  -3  18 9726.79 1542.21   5
  -1   3 -18 8784.17 954.997   4
   1   3  18 9019.58 1457.53   4
   1  -3  19-535.042 414.385   1
  -1   3 -19 445.576 312.556   2
   1   3  19 297.152 149.276   1
   1  -3  19 880.498 543.406   5
  -1   3 -19 215.723 164.278   4
   1   3  19 219.493 309.222   4
   1  -3  20 1010.64 568.810   1
   1   3  20 1421.35 297.072   1
  -1   3 -20 1873.07 567.669   2
   1  -3  20 1096.86 557.205   5
  -1   3 -20 1373.99 413.732   4
   1   3  20 562.621 404.605   4
  -1   3 -21 4889.17 970.075   2
   1  -3  21 2954.81 877.943   1
   1   3  21 4328.10 473.559   1
   1  -3  21 4147.47 1076.49   5
   1   3  21 4857.57 1135.34   4
  -1   3 -21 4186.81 739.695   4
   1   3  22 506.306 148.534   1
   1  -3  22 355.274 394.808   1
  -1   3 -22 173.910 212.488   2
   1  -3  22 615.603 501.270   5
  -1   3 -22 942.646 374.282   4
   1   3  22-213.937 375.019   4
  -1   3 -23 4599.54 994.658   2
   1  -3  23 4449.33 1117.14   1
   1  -3  23 3490.28 1068.00   5
  -1   3 -23 4758.48 849.118   4
   1   3  23 3937.60 1055.12   4
  -1   3 -24 28.6435 107.802   2
   1  -3  24 646.895 463.719   1
   1  -3  24-76.2990 333.577   5
  -1   3 -24 409.188 267.402   4
   1   3  24 196.885 333.387   4
  -1   3 -25 2351.05 737.814   2
   1  -3  25 4583.63 1141.29   1
   1  -3  25 2289.30 909.927   5
   1   3  25 4035.16 1089.75   4
  -1   3 -25 4071.12 825.436   4
   1  -3  26 4489.33 1139.00   1
   1  -3  26 2540.70 965.455   5
  -1   3 -26 4435.54 905.850   4
   1   3  26 6201.83 1384.60   4
   1  -3  27 628.110 465.873   1
   1  -3  27 353.791 391.832   5
  -1   3 -27 105.070 158.171   4
   1   3  27 1055.74 625.360   4
   1  -3  28 1354.00 675.679   1
   1  -3  28 1394.67 754.279   5
   1   3  28 1344.83 691.665   4
   1  -3  29-500.910 428.865   1
   1  -3  29-472.091 503.567   5
   1   3  29-36.6284 227.326   4
   1  -3  30 1886.68 829.107   1
   1  -3  30 2664.88 1060.91   5
   1   3  30 1364.83 725.810   4
   1  -3  31 2278.73 853.926   1
   1  -3  31 2949.74 1168.45   5
   1   3  31 2905.79 1023.52   4
   1  -3  32-54.5223 260.884   1
   1  -3  32 316.421 426.109   5
   1   3  32 1153.99 655.407   4
   1  -3  33-533.362 608.559   5
   1   3  33-37.9669 382.326   4
   1  -3  34-85.0482 243.716   5
   1   3  34-230.527 331.203   4
   1  -3  35 296.623 459.009   5
   1  -3  36 2023.47 1137.95   5
  -1   4  35 1660.13 952.318   5
  -1  -4  35 804.298 779.220   5
  -1  -4  34 116.037 272.950   5
  -1   4  34-474.361 553.308   5
  -1   4  33-1512.18 815.560   5
  -1  -4  33 1773.30 999.103   5
  -1   4  32 409.591 435.425   5
  -1  -4  32-1020.45 826.459   5
  -1   4  31 506.717 481.051   5
  -1  -4  31 410.092 501.395   5
  -1   4  31 332.292 457.779   4
  -1  -4  30 821.883 544.141   5
  -1   4  30-327.613 445.942   4
  -1  -4  29 216.133 408.731   5
  -1   4  29 782.650 557.762   4
  -1  -4  28 6158.43 1741.04   5
  -1   4  28 4630.10 1231.72   4
  -1  -4  27 75.0085 345.878   5
  -1   4  27 1052.34 514.215   4
  -1  -4  26 537.653 561.466   5
  -1   4  26 881.975 526.076   4
  -1  -4  25 434.598 525.958   5
  -1   4  25 507.023 510.002   4
  -1  -4  24-127.545 292.447   5
  -1   4  24 154.327 322.341   4
  -1  -4  23 1606.43 806.043   5
  -1   4  23 76.0115 267.199   4
   1   4 -23 1133.62 452.602   4
  -1  -4  22 161.186 412.972   5
   1   4 -22-605.995 334.567   4
  -1   4  22-798.910 524.437   4
  -1  -4  21 1188.45 682.725   5
  -1   4  21 387.449 375.678   4
   1   4 -21 312.018 268.227   4
  -1  -4  20 88.6352 346.804   5
  -1   4  20-276.791 350.905   4
  -1  -4  19 662.377 489.498   5
  -1   4  19 179.116 299.537   4
   1  -4 -18 497.214 348.186   2
  -1  -4  18 576.392 515.720   5
  -1   4  18-368.962 393.172   4
   1  -4 -17 3153.35 810.821   2
  -1  -4  17 2665.78 924.221   5
  -1   4  17 3010.65 908.300   4
   1  -4 -16 844.162 428.716   2
  -1  -4  16 200.524 364.836   5
  -1   4  16 1425.36 605.496   4
  -1   4  15 3567.22 563.942   1
   1  -4 -15 3532.33 836.069   2
   1   4 -15 3630.67 945.165   5
  -1  -4  15 3248.97 971.171   5
  -1   4  15 3172.77 913.064   4
   1   4 -14 325.780 228.333   2
   1  -4 -14 107.574 181.562   2
  -1   4  14-54.8180 94.5529   1
   1   4 -14 52.1850 188.319   5
  -1  -4  14-312.107 362.837   5
  -1   4  14 122.824 275.798   4
   1   4 -13 504.366 257.750   2
   1  -4 -13 658.001 349.636   2
  -1   4  13 488.627 254.829   1
   1   4 -13 696.313 400.331   5
  -1  -4  13 952.357 513.240   5
  -1  -4  13 1434.41 545.651   3
  -1   4  13 309.181 310.184   4
   1   4 -12 218.535 185.274   2
  -1   4  12 564.849 266.040   1
   1  -4 -12-244.810 229.913   2
   1   4 -12 150.819 176.764   5
  -1  -4  12 468.759 415.682   5
  -1  -4  12 248.325 286.961   3
  -1   4  12 377.792 336.132   4
   1   4 -11 552.890 248.459   2
  -1   4  11 626.714 286.376   1
   1  -4 -11 547.604 299.010   2
   1   4 -11 567.536 346.378   5
  -1  -4  11 996.642 525.820   5
  -1  -4  11 580.308 386.931   3
  -1   4  11 631.465 449.755   4
   1   4 -10 251.110 203.208   2
   1  -4 -10-170.006 161.572   2
  -1   4  10 103.297 139.154   1
  -1  -4  10 121.976 273.782   5
   1   4 -10 355.973 285.271   5
  -1   4  10-122.837 244.659   4
  -1  -4  10 42.4695 274.293   3
   1   4  -9 1330.10 355.200   2
  -1  -4   9 1383.17 547.004   3
   1  -4  -9 2025.96 503.221   2
  -1   4   9 1347.57 437.169   1
   1   4  -9 1217.66 485.755   5
  -1  -4   9 1700.55 639.284   5
  -1   4   9 1167.44 504.489   4
   1   4  -8 503.024 226.185   2
  -1  -4   8 582.483 387.219   3
   1  -4  -8-93.3378 364.868   3
   1  -4  -8 393.085 267.549   2
  -1   4   8 612.882 286.331   1
  -1  -4   8 677.015 473.080   5
   1   4  -8 267.591 254.449   5
  -1   4   8 619.660 353.171   4
  -1  -4   7 2386.58 671.343   3
   1   4  -7 3032.38 507.398   2
   1  -4  -7 2934.21 820.906   3
   1  -4  -7 2729.53 542.254   2
  -1   4   7 3168.64 686.799   1
   1   4  -7 2709.74 821.141   1
   1   4  -7 2324.71 648.544   5
  -1  -4   7 3117.57 869.992   5
  -1   4   7 2735.70 629.896   5
  -1   4   7 3000.86 750.140   4
   1  -4  -6 6923.16 1237.47   3
   1  -4  -6 7528.70 822.167   2
   1   4  -6 6814.37 727.288   2
  -1   4   6 7307.39 1054.61   1
   1   4  -6 8289.92 1407.70   1
   1   4  -6 6974.07 1128.47   5
  -1   4   6 7341.50 1010.75   5
  -1  -4   6 7911.19 1276.46   5
  -1   4   6 7083.16 1098.41   4
  -1  -4   6 7217.12 1162.90   3
   1  -4  -5 640.245 220.230   2
  -1  -4   5 513.523 338.177   3
   1   4  -5 750.341 258.479   2
   1  -4  -5 294.262 327.415   3
   1   4  -5 765.735 443.606   1
  -1   4   5 1146.22 435.968   1
  -1   4   5 845.398 330.595   5
   1   4  -5 412.542 297.332   5
  -1  -4   5 732.601 380.999   5
   1  -4  -4-420.836 375.374   3
  -1  -4   4 196.072 273.643   3
   1  -4  -4-147.089 114.915   2
   1   4  -4-103.926 182.917   2
  -1   4   4 29.1304 131.604   1
   1   4  -4-227.806 258.698   1
  -1   4   4 643.055 291.287   5
   1   4  -4-41.5175 129.589   5
  -1  -4   4 387.284 323.152   5
   1  -4  -3 893.250 209.661   2
   1  -4  -3 254.367 253.782   3
  -1  -4   3 822.306 445.570   3
   1   4  -3 384.676 312.144   5
  -1   4   3 843.424 294.133   5
  -1   4   3 867.833 374.583   1
   1   4  -3 1192.99 542.050   1
   1   4  -3 981.178 309.541   2
   1  -4  -2 356.090 266.975   3
   1  -4  -2 40.0319 57.8561   2
  -1  -4   2-51.0069 205.817   3
   1   4  -2-112.824 209.738   1
   1   4  -2-114.338 183.693   2
  -1   4   2 241.393 232.787   1
   1   4  -2-356.997 309.860   5
  -1   4   2-184.500 169.779   5
   1   4  -1 17227.8 1226.17   2
  -1   4   1 18416.5 1839.95   1
   1   4  -1 17802.3 1940.77   1
   1   4  -1 17606.3 1816.81   5
  -1   4   1 17416.2 1245.17   5
  -1  -4   1 19736.2 1934.89   3
  -1   4   1 19913.6 1665.87   4
   1  -4  -1 18101.8 1965.96   3
   1   4   0 5185.10 689.926   2
  -1  -4   0 5868.15 703.710   2
   1  -4   0 5070.40 1045.98   3
  -1  -4   0 4942.13 996.798   3
  -1   4   0 5809.27 1048.74   1
   1   4   0 5143.57 1047.22   1
  -1   4   0 5412.37 674.398   5
   1   4   0 5147.89 1008.96   5
  -1   4   0 4522.19 782.047   4
  -1  -4  -1 12762.3 1061.15   2
   1   4   1 12987.0 1131.85   2
   1  -4   1 13029.8 1535.35   1
  -1   4  -1 13196.5 1620.95   1
   1   4   1 13435.5 1625.33   1
  -1   4  -1 12688.3 1008.82   5
   1   4   1 12790.1 1594.05   5
  -1   4  -1 13154.9 1304.05   4
  -1  -4  -1 13113.5 1589.53   3
   1  -4   1 13920.6 1697.00   3
  -1  -4  -2-557.134 383.949   3
   1  -4   2-179.533 277.701   3
  -1  -4  -2 245.660 166.211   2
  -1   4  -2 321.038 286.029   1
   1  -4   2 248.252 271.259   1
   1   4   2-0.85151 106.144   2
   1   4   2 95.8789 150.446   1
  -1   4  -2-500.827 220.802   5
   1   4   2 10.1280 156.222   5
  -1   4  -2 388.384 243.629   4
  -1  -4  -3 327.289 300.579   3
   1  -4   3 514.112 441.562   3
  -1  -4  -3 383.782 198.989   2
  -1   4  -3 158.996 267.226   1
   1   4   3 409.287 247.488   2
   1   4   3 320.446 193.746   1
   1  -4   3 721.941 466.477   1
   1   4   3-168.849 243.458   5
  -1   4  -3 358.956 184.876   5
   1   4   3 332.744 241.055   3
  -1  -4  -4 19.2821 79.9165   2
   1  -4   4-437.473 355.085   3
  -1   4  -4 240.461 257.679   1
   1   4   4 307.787 278.792   1
   1   4   4 420.325 261.678   2
   1  -4   4 313.638 316.657   1
   1   4   4 41.4606 239.475   5
  -1   4  -4 38.8896 103.446   5
   1   4   4 342.030 275.299   3
  -1  -4  -5 6846.69 887.320   2
   1  -4   5 8133.51 1295.54   1
  -1   4  -5 8405.69 1353.13   1
   1   4   5 7027.75 1135.40   1
   1   4   5 6694.39 1228.25   5
   1  -4   5 6979.36 905.382   5
  -1   4  -5 6259.79 743.302   5
   1  -4   5 6620.36 1216.47   3
   1   4   5 7315.75 1291.44   3
   1   4   5 6423.37 1161.92   4
  -1  -4  -6 635.198 277.924   2
   1   4   6 627.302 370.300   3
   1  -4   6 786.437 566.680   1
  -1   4  -6 589.674 500.679   1
   1   4   6 1078.58 430.709   1
   1  -4   6 606.830 322.581   5
   1   4   6 755.700 438.539   5
   1  -4   6 405.128 384.552   3
   1   4   6 862.877 419.003   4
  -1  -4  -7 16877.7 1511.35   2
   1  -4   7 17039.5 1915.92   1
   1   4   7 17574.9 1730.59   1
  -1   4  -7 18600.3 2041.68   1
   1  -4   7 18025.9 1633.15   5
   1   4   7 17652.6 2020.61   5
   1   4   7 16591.9 1975.52   3
   1  -4   7 16104.3 1873.79   3
   1   4   7 18620.1 1970.98   4
  -1  -4  -8 3976.85 771.763   2
   1  -4   8 3703.61 933.157   1
   1   4   8 3548.25 777.111   1
   1  -4   8 3370.95 753.762   5
   1   4   8 3577.18 917.523   4
   1   4   8 3469.80 944.421   5
  -1  -4  -9 1956.06 556.569   2
   1  -4   9 2097.54 779.729   1
   1   4   9 2121.24 591.058   1
   1  -4   9 1624.87 530.463   5
   1   4   9 1976.71 695.877   4
  -1   4 -10 4126.89 336.307   2
  -1   4 -10 4224.15 363.346   2
  -1  -4 -10 3910.04 818.829   2
   1  -4  10 3131.97 854.615   1
   1   4  10 3854.79 781.672   1
   1  -4  10 4238.98 865.541   5
   1   4  10 3985.19 987.405   4
  -1   4 -11 1876.10 292.523   2
  -1  -4 -11 1279.50 457.127   2
   1  -4  11 2759.42 817.802   1
  -1   4 -11 1937.14 306.609   2
   1   4  11 1911.18 529.708   1
   1  -4  11 2266.02 667.675   5
   1   4  11 2064.71 725.070   4
  -1   4 -12 1851.27 326.513   2
  -1   4 -12 1787.14 333.532   2
  -1  -4 -12 1786.38 564.785   2
   1  -4  12 1986.13 758.908   1
   1   4  12 2203.69 566.875   1
   1  -4  12 2118.81 677.716   5
   1   4  12 2906.79 845.141   4
  -1   4 -13 13238.7 995.185   2
  -1  -4 -13 13164.4 1606.93   2
   1   4  13 11686.9 1278.13   1
   1  -4  13 13017.8 1821.40   1
   1  -4  13 12761.0 1678.53   5
   1   4  13 12345.0 1737.59   4
  -1   4 -14 2128.58 441.018   2
   1   4  14 1730.14 476.879   1
   1  -4  14 2740.32 849.843   1
  -1  -4 -14 1868.08 629.447   2
   1  -4  14 2394.37 755.356   5
   1   4  14 3153.06 912.933   4
  -1   4 -15 4702.35 689.820   2
   1  -4  15 4645.07 1109.41   1
  -1  -4 -15 5893.90 1124.47   2
   1   4  15 4147.74 728.551   1
   1  -4  15 5047.26 1149.85   5
   1   4  15 4510.47 1138.30   4
   1   4  16 761.880 345.207   1
  -1  -4 -16 648.794 398.424   2
  -1   4 -16 1093.17 359.800   2
   1  -4  16 553.166 460.044   1
   1  -4  16 514.497 488.359   5
  -1   4 -16 864.204 271.092   4
   1   4  16 760.666 530.851   4
   1   4  17 720.421 304.912   1
  -1   4 -17 594.775 270.566   2
   1  -4  17 310.736 460.152   1
   1  -4  17 994.896 546.849   5
   1   4  17 1052.02 614.153   4
  -1   4 -17 460.237 230.391   4
  -1   4 -18 16608.0 1500.75   2
   1  -4  18 14634.8 2034.01   1
   1   4  18 15754.1 1301.88   1
   1  -4  18 16110.2 2149.60   5
   1   4  18 15872.6 2122.53   4
  -1   4 -18 15539.0 1277.25   4
  -1   4 -19 3883.45 776.143   2
   1   4  19 2783.60 519.596   1
   1  -4  19 4290.23 1158.55   1
   1  -4  19 2599.39 859.364   5
   1   4  19 2831.40 939.935   4
  -1   4 -19 3100.77 593.037   4
   1   4  20 1802.69 408.466   1
  -1   4 -20 1570.73 510.145   2
   1  -4  20 1966.81 787.519   1
   1  -4  20 2378.89 852.949   5
   1   4  20 1919.06 806.993   4
  -1   4 -20 1713.02 457.497   4
  -1   4 -21 10258.5 1338.89   2
   1  -4  21 11093.4 1843.55   1
   1  -4  21 10309.1 1830.15   5
   1   4  21 10635.4 1791.89   4
  -1   4 -21 10956.2 1160.77   4
   1  -4  22-21.1063 212.195   1
  -1   4 -22 20.4745 114.016   2
   1  -4  22-150.706 312.909   5
   1   4  22 346.250 367.950   4
   1  -4  23 382.087 416.021   1
   1  -4  23 944.389 687.320   5
   1   4  23-13.7540 240.200   4
   1  -4  24 1129.45 629.080   1
   1  -4  24 1079.07 676.689   5
   1   4  24 785.993 572.098   4
   1  -4  25-305.263 412.093   1
   1  -4  25 564.234 509.527   5
   1   4  25-204.762 317.824   4
   1  -4  26-142.818 307.230   1
   1  -4  26-676.854 572.115   5
   1   4  26-410.962 462.684   4
   1  -4  27-224.332 360.451   1
   1  -4  27 444.148 500.773   5
   1   4  27-748.839 581.289   4
   1  -4  28 860.622 691.747   5
   1   4  28 350.994 435.777   4
   1  -4  29 83.5972 239.367   5
   1   4  29-710.434 539.607   4
   1  -4  30 2184.19 1008.61   5
   1   4  30 1553.58 807.528   4
   1  -4  31 32.9417 271.861   5
   1   4  31 542.148 494.101   4
   1  -4  32 693.778 593.725   5
   1  -4  33 1086.13 814.196   5
   1  -4  34 1590.61 954.300   5
   1  -4  35 3835.40 1452.94   5
  -1   5  33 650.075 569.937   5
  -1   5  32-57.2990 207.790   5
  -1  -5  32 412.137 639.427   5
  -1  -5  31-598.191 666.100   5
  -1   5  31 992.429 652.874   5
  -1  -5  30 28.9659 359.426   5
  -1   5  30-378.003 414.967   5
  -1  -5  29-583.373 569.989   5
  -1  -5  28-496.552 514.366   5
  -1   5  28 36.6252 298.470   4
  -1  -5  27 1854.38 963.356   5
  -1   5  27-224.052 358.277   4
  -1  -5  26 674.735 593.268   5
  -1   5  26 421.341 439.664   4
  -1  -5  25-1328.41 797.293   5
  -1   5  25-908.136 632.413   4
  -1  -5  24 121.963 366.307   5
  -1   5  24 1036.90 662.088   4
  -1  -5  23-15.1812 279.665   5
  -1   5  23-442.810 435.213   4
   1   5 -22 1070.12 458.163   2
  -1  -5  22 1273.58 772.959   5
  -1   5  22 1198.27 780.011   4
   1   5 -21 1753.61 557.232   2
  -1  -5  21 568.949 564.867   5
  -1   5  21 1900.16 804.605   4
  -1  -5  20 2506.63 874.346   5
  -1  -5  20 2015.34 783.253   3
  -1   5  20 2203.15 858.332   4
  -1  -5  19 6078.34 1582.05   5
  -1   5  19 6611.02 1414.37   4
  -1  -5  19 5951.35 1305.13   3
  -1  -5  18 1268.23 707.629   5
  -1   5  18 1542.88 722.543   4
  -1  -5  18 726.611 505.326   3
   1   5 -17 501.053 272.858   2
  -1  -5  17-551.414 544.022   5
  -1   5  17 170.946 411.270   4
  -1  -5  17 93.8654 226.368   3
   1   5 -16 81.2791 153.073   2
   1  -5 -16 254.614 259.432   2
  -1  -5  16-197.923 329.691   5
  -1  -5  16 372.987 456.787   3
  -1   5  16 683.253 477.831   4
   1  -5 -15 12747.0 1596.18   2
   1   5 -15 14617.9 1301.15   2
  -1   5  15 14734.2 1399.66   1
  -1  -5  15 15164.0 2233.27   5
  -1   5  15 16193.8 2123.12   4
  -1  -5  15 15560.3 2004.06   3
   1   5 -14 7094.53 876.398   2
  -1  -5  14 7548.76 1408.09   3
  -1   5  14 6963.04 998.030   1
   1  -5 -14 7059.61 1155.51   2
  -1  -5  14 7077.28 1496.06   5
   1   5 -14 6753.72 1276.62   5
  -1   5  14 7015.58 1396.05   4
  -1  -5  13 3684.81 1001.90   3
   1   5 -13 3932.93 628.966   2
   1  -5 -13 4089.13 863.314   2
  -1   5  13 3916.65 781.227   1
   1   5 -13 3211.73 860.827   5
  -1  -5  13 3973.01 1156.08   5
  -1   5  13 3855.52 1015.93   4
   1   5 -12 1169.47 333.944   2
  -1  -5  12 880.738 520.096   3
  -1   5  12 865.287 377.018   1
   1  -5 -12 1102.83 420.301   2
   1   5 -12 1351.37 547.239   5
  -1  -5  12 206.695 348.730   5
  -1   5  12 1390.19 613.487   5
  -1   5  12 969.632 544.105   4
  -1  -5  11 1833.59 707.566   3
   1   5 -11 1589.42 394.302   2
   1  -5 -11 1555.54 504.289   2
  -1   5  11 1716.76 555.158   1
  -1  -5  11 2299.35 837.093   5
   1   5 -11 2046.38 664.814   5
  -1   5  11 2009.73 673.151   5
  -1   5  11 2223.76 792.940   4
   1   5 -10 667.498 244.759   2
   1  -5 -10 911.328 363.175   2
  -1  -5  10 554.992 428.697   3
  -1   5  10 1017.34 430.655   1
  -1  -5  10-459.397 409.302   5
  -1   5  10 1198.63 501.137   5
   1   5 -10 526.269 338.456   5
  -1   5  10 893.402 493.176   4
  -1  -5   9 622.849 450.727   3
   1  -5  -9 659.036 285.645   2
   1   5  -9 448.728 210.444   2
  -1   5   9 411.804 239.733   1
  -1   5   9 848.958 383.496   5
   1   5  -9 183.976 237.863   5
  -1  -5   9 1419.72 701.063   5
  -1   5   9 1458.60 613.562   4
   1   5  -8 4625.93 592.054   2
  -1  -5   8 3978.65 1014.24   3
   1  -5  -8 5439.78 798.559   2
  -1   5   8 4908.32 979.833   1
  -1   5   8 5006.17 961.916   5
   1   5  -8 4186.48 937.378   5
  -1  -5   8 6324.11 1281.72   5
  -1   5   8 4060.51 992.791   4
   1  -5  -7 10726.6 1025.58   2
   1   5  -7 9318.21 827.861   2
  -1   5   7 8880.31 1335.20   1
   1   5  -7 12068.4 1595.40   5
  -1   5   7 11476.2 1354.90   5
  -1  -5   7 12592.8 1743.75   5
  -1   5   7 11186.5 1555.73   4
   1  -5  -7 10097.6 1664.12   3
  -1  -5   7 10891.1 1638.20   3
  -1  -5   6 191.500 288.255   3
   1  -5  -6 559.752 216.638   2
   1  -5  -6 6.78899 313.565   3
  -1   5   6 214.933 274.053   1
   1   5  -6 223.136 143.398   2
   1   5  -6-680.079 403.147   5
  -1   5   6 479.943 287.187   5
  -1   5   6 955.636 548.405   4
   1  -5  -5 8057.90 739.488   2
   1   5  -5 6465.21 679.531   2
  -1  -5   5 7286.22 1335.22   3
   1  -5  -5 6243.90 1334.41   3
  -1   5   5 7818.54 1288.35   1
  -1   5   5 7151.83 1001.23   5
   1   5  -5 6493.79 1170.70   5
  -1   5   5 8217.23 1304.27   4
   1  -5  -4 1115.44 547.396   3
  -1  -5   4 1814.40 632.854   3
   1  -5  -4 1274.28 257.639   2
  -1   5   4 1296.45 536.939   1
   1   5  -4 731.029 203.040   2
  -1   5   4 1476.82 441.743   5
   1   5  -4 680.286 391.530   5
  -1   5   4 1444.97 567.062   4
   1  -5  -3 5991.12 1261.74   3
   1   5  -3 6363.19 704.079   2
  -1  -5   3 6296.78 1252.74   3
  -1   5   3 7349.76 1299.93   1
   1   5  -3 5532.33 1060.18   5
  -1   5   3 6762.68 872.945   5
  -1   5   3 5324.38 1015.71   4
   1  -5  -2 6968.50 1344.55   3
   1   5  -2 6752.83 751.989   2
  -1  -5   2 4978.39 1092.04   3
  -1   5   2 7238.91 849.692   5
   1   5  -2 7001.14 1229.82   5
  -1   5   2 7165.95 1158.23   4
  -1  -5   1 699.334 515.936   3
   1  -5  -1 634.523 453.353   3
   1   5  -1 1051.42 330.155   2
  -1   5   1 638.729 213.097   5
   1   5  -1 1309.88 541.933   5
  -1   5   1 882.785 403.716   4
  -1  -5   0 3287.31 913.367   3
   1  -5   0 2865.51 883.989   3
  -1   5   0 2589.31 469.881   5
   1   5   0 1971.14 625.452   5
  -1   5   0 2338.50 644.804   4
   1   5   1 23392.8 2297.48   5
  -1   5  -1 24944.3 1462.30   5
  -1  -5  -1 28840.8 2635.48   3
   1  -5   1 21929.7 2447.26   3
  -1  -5  -2 765.252 495.645   3
  -1  -5  -2 504.324 233.857   2
   1  -5   2 910.833 545.693   3
  -1   5  -2-86.1957 199.999   5
   1   5   2 35.3581 178.999   5
   1  -5   3 6538.83 1333.43   3
  -1  -5  -3 5798.83 804.700   2
  -1   5  -3 6198.79 725.514   5
   1   5   3 5439.22 1144.74   5
   1   5   3 6719.79 1271.62   4
   1  -5   4 163.400 281.889   3
  -1  -5  -4 109.292 151.477   2
   1   5   4-859.438 496.297   5
  -1   5  -4-515.354 231.142   5
   1   5   4-289.996 367.492   4
  -1  -5  -5-111.286 124.136   2
   1  -5   5-81.1376 340.050   3
   1   5   5-209.298 264.635   1
   1   5   5-58.8327 235.477   5
   1   5   5 90.9274 278.154   4
  -1  -5  -6 340.073 231.733   2
   1  -5   6 30.3232 226.534   3
   1   5   6 80.6307 183.811   1
   1   5   6-77.0979 204.408   5
   1   5   6 220.370 316.459   4
   1  -5   7 223.921 312.653   3
  -1  -5  -7-179.101 179.421   2
   1   5   7-468.524 332.777   1
   1   5   7-803.762 492.133   5
   1   5   7 248.544 334.738   4
  -1  -5  -8 33.2257 83.1029   2
   1  -5   8-366.946 363.275   3
   1   5   8 9.36484 114.216   1
   1   5   8 274.261 288.063   5
   1   5   8 347.186 379.675   4
   1  -5   8 849.037 390.212   5
  -1  -5  -9 635.943 327.148   2
   1   5   9-180.643 241.728   1
   1   5   9 121.663 211.537   5
   1   5   9 586.475 363.200   4
   1  -5   9 384.017 295.722   5
   1  -5   9 2.41031 362.541   3
  -1  -5 -10-223.784 224.071   2
   1   5  10 157.994 158.476   1
   1   5  10 369.897 417.049   5
   1  -5  10-287.739 282.725   5
   1  -5  10 233.851 320.484   3
   1   5  10 91.0499 382.308   4
  -1  -5 -11 199.812 199.699   2
   1   5  11-261.933 226.470   1
   1  -5  11-196.059 302.513   5
   1   5  11-16.7282 224.450   4
   1  -5  11-174.794 302.480   3
   1   5  11 252.831 289.784   5
  -1  -5 -12 1827.97 625.471   2
   1   5  12 1816.32 591.151   1
   1  -5  12 1606.38 599.243   5
   1   5  12 1213.66 641.059   5
   1  -5  12 1861.89 743.774   3
   1   5  12 1031.67 573.023   4
  -1  -5 -13 333.744 294.690   2
   1   5  13 1089.35 443.516   1
   1  -5  13 257.273 325.098   5
   1   5  13 577.891 469.477   5
   1   5  13 1019.43 582.904   4
   1  -5  13 454.921 457.711   3
  -1  -5 -14 702.448 355.666   2
   1   5  14 900.144 411.057   1
   1  -5  14 1603.52 624.796   5
   1   5  14 1064.86 616.310   4
   1   5  15 1812.96 567.358   1
   1  -5  15 1878.38 778.796   5
   1   5  15 1412.11 694.900   4
   1  -5  16 213.449 302.324   5
   1   5  16-307.368 554.224   4
   1  -5  17 1153.75 592.134   5
   1   5  17 2874.44 960.631   4
   1  -5  18 41.6981 205.589   5
   1   5  18-84.7885 309.302   4
   1  -5  19 895.789 559.239   5
   1   5  19 983.867 612.627   4
   1  -5  20 732.993 513.494   5
   1   5  20 949.479 691.996   4
   1  -5  21-765.161 527.582   5
   1   5  21 404.542 439.133   4
   1  -5  22-684.170 500.632   5
   1   5  22-533.277 472.604   4
   1  -5  23 1801.62 830.805   5
   1   5  23 1216.87 692.580   4
   1  -5  24-410.005 437.396   5
   1   5  24 695.888 683.015   4
   1  -5  25 1224.97 722.936   5
   1   5  25 739.939 561.738   4
   1  -5  26 433.812 529.948   5
   1   5  26 512.061 493.499   4
   1  -5  27-419.940 496.741   5
   1   5  27-31.1996 348.208   4
   1  -5  28 851.777 654.480   5
  -1  -6  25 698.023 538.510   3
  -1  -6  24 671.136 568.873   3
  -1   6  23 3.34200 533.068   4
  -1  -6  23 473.874 413.655   3
  -1  -6  22-867.201 561.137   3
  -1   6  22 26.0555 172.058   4
  -1  -6  21 2336.21 920.807   3
  -1   6  21 3556.71 1224.07   4
  -1  -6  20 1539.40 734.869   3
  -1   6  20 935.933 640.707   4
  -1  -6  19 1598.32 736.729   3
  -1   6  19 1918.79 847.404   4
  -1  -6  18 643.118 489.010   3
  -1   6  18 602.759 567.925   4
  -1  -6  17 4755.19 1213.43   3
  -1   6  17 4410.35 1269.68   4
  -1  -6  16-193.177 344.628   3
  -1   6  16-497.762 504.195   4
  -1  -6  15 1075.87 700.351   3
  -1   6  15 964.528 605.311   4
  -1  -6  14 3376.34 1070.28   3
  -1   6  14 4063.90 1121.17   4
  -1  -6  14 3163.46 1025.25   5
  -1  -6  13 243.527 318.904   3
  -1   6  13 867.208 481.183   4
  -1  -6  13 750.582 532.575   5
  -1  -6  12 287.544 315.009   3
  -1   6  12-135.308 408.791   4
  -1  -6  12 340.541 366.410   5
  -1  -6  11 726.095 531.714   3
  -1   6  11-173.612 349.874   4
  -1  -6  10 1777.14 793.273   3
  -1   6  10 1869.78 748.173   4
  -1  -6   9-263.550 368.593   3
  -1   6   9-14.0490 244.016   4
  -1  -6   8 154.500 387.835   3
  -1   6   8-68.2823 211.050   4
  -1  -6   7 2769.10 926.289   3
  -1   6   7 1582.53 631.251   4
  -1  -6   6 858.881 517.064   3
   1  -6  -6 2545.36 878.857   3
  -1   6   6 1004.55 517.010   4
   1  -6  -5 3740.46 1129.52   3
  -1  -6   5 3789.79 1172.98   3
  -1   6   5 2963.06 845.117   4
   1  -6  -4 319.616 493.075   3
  -1  -6   4 1053.55 614.460   3
  -1   6   4 769.263 465.960   4
   1  -6  -3 955.012 571.755   3
  -1  -6   3 985.611 579.605   3
  -1   6   3 492.962 381.779   4
  -1  -6   2 5511.29 1322.78   3
   1  -6  -2 4775.69 1257.75   3
   1   6  -2 7119.59 1393.25   4
  -1   6   2 7587.26 1307.01   4
   1  -6  -1 729.486 516.955   3
  -1  -6   1 1149.22 628.965   3
   1   6  -1 926.275 552.698   4
  -1   6   1 417.667 338.287   4
  -1  -6   0 382.246 500.381   3
   1  -6   0 498.253 457.002   3
  -1   6   0 204.203 256.972   4
   1   6   0 799.504 506.912   4
   1  -6   1 1161.62 649.812   3
   1   6   1 114.515 326.847   4
  -1   6  -1 947.537 455.640   4
   1  -6   2-222.338 379.097   3
   1   6   2-99.4062 305.924   4
  -1   6  -2 26.9321 185.350   4
   1  -6   3 40.1438 257.477   3
  -1   6  -3 290.061 139.914   4
   1   6   3 2.47010 301.633   4
   1  -6   4 912.837 612.359   3
   1   6   4 879.611 626.821   4
  -1   6  -4 115.214 244.068   4
   1   6   5 18464.5 2355.65   4
  -1   6  -5 16036.8 1709.91   4
   1  -6   5 14815.6 2264.70   3
   1   6   6 15895.2 2187.90   4
  -1   6  -6 15021.9 1630.82   4
   1  -6   6 14147.0 2213.35   3
   1  -6   7 228.688 382.948   3
  -1   6  -7 264.630 252.584   4
   1   6   7-5.26550 332.768   4
   1  -6   8-294.106 434.507   3
   1   6   8 861.722 559.821   4
   1  -6   9 118.559 376.663   3
   1   6   9 692.669 500.970   4
   1  -6  10 3743.12 1193.97   3
   1   6  10 2678.64 958.351   4
   1  -6  11 1423.24 662.625   3
   1   6  11 2496.39 982.310   4
   1  -6  12 140.479 267.859   3
   1   6  12 458.488 471.217   4
   1  -6  13 736.371 550.295   3
   1   6  13-340.049 405.237   4
   1  -6  14 1143.11 756.617   3
   1   6  14 1652.68 790.767   4
   1  -6  15 2029.84 920.991   3
   1   6  15 2114.42 887.861   4
   1   6  16-149.127 261.266   4
   1  -6  16 353.353 473.603   3
   1  -6  17 467.976 594.847   3
   1   6  17-647.636 553.994   4
   1   6  18 651.230 558.496   4
   1  -6  18 398.051 494.412   3
   1   6  19 141.876 410.475   4
   1  -6  19-209.725 328.521   3
   1   6  20 1002.86 761.947   4
   1  -6  20 1408.97 767.499   3
   1   6  21-363.725 405.725   4
   1  -6  21-204.711 336.969   3
   1   6  22 377.704 439.665   4
   1  -6  22 283.812 428.679   3
   1  -6  23-452.966 493.613   3
   1  -6  24-430.651 500.908   3
  -1  -7  19 280.786 444.414   3
  -1  -7  18 241.666 384.785   3
  -1   7  18 407.429 529.473   4
  -1  -7  17 239.745 399.134   3
  -1   7  17 961.124 658.487   4
  -1  -7  16 741.003 699.080   3
  -1   7  16-357.272 412.250   4
  -1  -7  15 1218.83 730.904   3
  -1   7  15 1497.20 790.177   4
  -1  -7  14 427.499 500.672   3
  -1   7  14 196.588 352.654   4
  -1  -7  13-792.895 593.209   3
  -1   7  13 17.9951 392.938   4
  -1  -7  12-215.423 338.837   3
  -1   7  12-222.596 382.086   4
  -1  -7  11 961.119 636.370   3
  -1   7  11 947.517 566.508   4
  -1  -7  10 586.180 550.131   3
  -1   7  10-601.395 523.896   4
  -1  -7   9 1364.38 690.931   3
  -1   7   9 849.282 521.568   4
  -1  -7   8-197.984 309.220   3
  -1   7   8-646.525 453.596   4
  -1  -7   7 450.526 476.450   3
  -1   7   7 698.537 530.448   4
  -1  -7   6 556.685 526.801   3
  -1   7   6 256.599 355.861   4
  -1  -7   5 222.532 364.176   3
  -1   7   5 658.880 436.181   4
  -1  -7   4 242.934 396.412   3
  -1   7   4 1324.54 606.881   4
   1   7  -4 837.223 514.091   4
   1  -7  -3 668.031 491.692   3
  -1  -7   3-428.537 493.849   3
   1   7  -3 582.826 446.664   4
   1  -7  -2-10.0382 217.326   3
   1   7  -2 79.9509 231.678   4
   1  -7  -1 817.719 594.433   3
   1   7  -1 989.574 596.326   4
   1  -7   0 555.592 478.288   3
   1   7   0 1426.89 693.881   4
   1  -7   1-269.202 412.454   3
   1   7   1 878.319 580.974   4
   1  -7   2 815.683 612.716   3
   1   7   2-22.5942 446.506   4
   1  -7   3 344.025 401.423   3
   1   7   3-46.0093 307.959   4
   1  -7   4 2144.49 961.168   3
   1   7   4-547.367 499.598   4
   1  -7   5-115.122 327.979   3
   1   7   5-348.629 432.022   4
   1  -7   6 481.303 504.574   3
   1   7   6 603.872 494.154   4
   1  -7   7 613.447 600.676   3
   1   7   7 71.1563 244.836   4
   1  -7   8 1557.54 834.429   3
   1   7   8 369.138 450.876   4
   1  -7   9 1405.30 798.865   3
   1   7   9 1467.32 758.208   4
   1  -7  10 210.301 326.933   3
   1   7  10 1093.16 661.138   4
   1  -7  11 442.586 529.762   3
   1   7  11-685.145 547.579   4
   1  -7  12-294.272 456.771   3
   1   7  12-881.351 636.009   4
   1  -7  13 1901.00 995.116   3
   1   7  13-183.956 334.482   4
   1  -7  14-67.1791 360.774   3
   1   7  14-38.8913 316.374   4
   1  -7  15-154.078 393.167   3
   1   7  15-709.076 568.712   4
  -2   0  38 2814.25 1223.68   5
  -2   0  37 699.428 622.084   5
  -2   0  36 10893.3 2303.16   5
  -2   0  35 1481.41 858.533   5
  -2   0  34 4716.08 1456.05   5
  -2   0  33 325.555 394.199   5
  -2   0  32 703.041 564.515   5
  -2   0  31 426.965 437.221   5
  -2   0  30 14536.3 2356.46   5
  -2   0  29 1644.28 889.147   5
  -2   0  28 23491.1 2844.56   5
  -2   0  27 913.637 561.416   5
  -2   0  26 836.246 558.371   5
  -2   0  25 7.65081 227.440   5
   2   0 -24 385.350 205.000   1
  -2   0  24 504.867 481.960   5
   2   0 -23-393.962 207.438   1
  -2   0  23 336.888 356.000   5
   2   0 -23 14.3499 133.020   4
   2   0 -22 5767.88 717.187   1
  -2   0  22 5210.89 1217.05   5
   2   0 -22 7006.03 1182.15   4
   2   0 -21 93.7922 125.231   1
   2   0 -21 140.465 185.418   4
   2   0 -20 75203.4 2516.57   1
   2   0 -20 82926.1 3855.23   4
   2   0 -19-34.5377 127.443   1
   2   0 -19-70.7833 166.155   4
   2   0 -18 27234.0 1477.94   1
   2   0 -18 27999.2 2116.17   4
   2   0 -17-16.5897 132.523   1
   2   0 -17 60.0483 165.764   4
   2   0 -16 123782. 3062.59   1
   2   0 -16 129095. 4228.90   4
   2   0 -15-160.687 181.823   1
   2   0 -15 9.84070 145.632   4
   2   0 -14 21576.4 1219.57   1
   2   0 -14 22803.7 1657.62   4
   2   0 -13-18.9104 120.739   1
   2   0 -13-139.235 149.258   4
   2   0 -12 53278.6 1784.25   1
   2   0 -12 53023.4 2336.09   4
   2   0 -11-30.9708 186.687   5
   2   0 -11 118.781 127.257   4
   2   0 -10 51235.7 2462.74   5
  -2   0  10 51492.5 2567.39   5
   2   0 -10 50498.5 2098.48   4
   2   0  -9-31.0444 168.782   5
  -2   0   9-167.882 337.778   5
   2   0  -9-14.5465 127.446   4
   2   0  -8 106046. 3291.32   5
  -2   0   8 103867. 3436.51   5
  -2   0   7-29.4955 64.9706   3
   2   0  -7 151.373 198.199   5
  -2   0   7-104.359 212.928   5
  -2   0   6 2381.81 510.620   5
   2   0  -6 2327.71 456.238   5
  -2   0   6 2662.67 273.565   3
   2   0  -5-75.9347 164.988   5
  -2   0   5-135.047 259.516   5
  -2   0   5-11.9737 58.5845   3
  -2   0   4 192805. 4050.76   5
   2   0  -4 184825. 3829.86   5
   2   0  -4 190878. 1969.46   3
   2   0  -3-60.3457 165.151   5
  -2   0   3 1.95948 169.684   5
   2   0  -2 2027.49 401.669   5
  -2   0   2 2184.30 446.347   5
  -2   0   1-26.3264 81.4297   2
  -2   0   1-211.644 229.162   5
   2   0  -1 11.9672 123.328   5
  -2   0   0 22349.5 1059.39   2
  -2   0   0 24022.4 1264.90   5
   2   0   0 22948.1 1268.56   5
  -2   0  -1 58.2262 120.896   2
   2   0   1 181.203 171.764   5
  -2   0  -2 10376.4 757.135   2
  -2   0  -3-203.263 196.635   2
   2   0   4 933938. 7709.63   2
  -2   0  -4 912879. 7753.49   2
  -2   0  -5 89.9821 135.674   2
   2   0   5-63.3920 202.755   2
   2   0   6 77169.7 2472.01   2
  -2   0  -6 75654.2 2429.28   2
   2   0   7-46.6874 235.631   2
  -2   0  -7 126.426 181.722   2
   2   0   7-38.0315 162.384   4
  -2   0  -8 107855. 3187.85   2
   2   0   8 110254. 3204.67   2
   2   0   8 112833. 2832.80   4
  -2   0  -9 61.7649 171.505   2
   2   0   9-10.0839 231.315   2
   2   0   9 49.8617 135.107   4
   2   0  10 7435.94 897.960   2
  -2   0 -10 6394.37 858.099   2
   2   0  10 6981.74 774.346   4
  -2   0 -11 44.8270 152.106   2
   2   0  11 109.517 160.706   4
  -2   0 -12 52836.4 2624.12   2
  -2   0 -12 53102.9 2387.41   4
   2   0  12 53912.6 2302.43   4
  -2   0 -13 150.586 188.536   2
   2   0  13 54.5314 163.833   4
  -2   0 -13 184.424 173.857   4
  -2   0 -14 3529.12 736.651   2
  -2   0 -14 4148.25 717.020   4
   2   0  14 4582.58 734.356   4
   2   0  15-345.835 189.588   1
  -2   0 -15-88.3739 127.800   2
   2   0  15-59.3418 158.470   4
  -2   0 -15-296.670 213.374   4
  -2   0 -16 2349.90 643.785   2
   2   0  16 1760.91 436.528   1
   2   0  16 2256.89 550.628   4
  -2   0 -16 2424.45 603.769   4
  -2   0 -17-49.3765 176.608   2
   2   0  17-140.353 227.383   1
   2   0  17-15.4037 144.063   4
  -2   0 -17-231.055 210.572   4
  -2   0 -18 63.8616 262.375   2
   2   0  18-89.7117 157.554   1
   2   0  18 42.8548 177.580   4
  -2   0 -18-124.997 171.702   4
   2   0  19 326.303 287.246   1
  -2   0 -19 29.4973 219.587   2
   2   0  19 178.423 414.606   4
  -2   0 -19 323.325 331.454   4
  -2   0 -20 81771.9 4215.63   2
  -2   0 -20 78369.5 3791.77   4
   2   0  20 79256.7 3485.32   4
  -2   0 -21 199.664 335.912   2
   2   0  21 626.966 569.865   4
  -2   0 -21 393.816 327.219   4
  -2   0 -22 25406.1 2468.39   2
  -2   0 -22 21140.3 2076.10   4
   2   0  22 24345.2 2011.14   4
  -2   0 -23-150.126 184.096   4
   2   0  23-37.0474 261.737   4
   2   0  24 3836.61 849.877   4
  -2   0 -24 4045.69 942.818   4
   2   0  25 386.291 293.278   4
  -2   0 -25-355.565 321.776   4
   2   0  26 18.3706 248.974   4
   2   0  27 324.752 264.957   1
   2   0  27-238.290 268.211   4
   2   0  28 1364.53 540.640   1
   2   0  28 2104.93 693.556   4
   2   0  29-10.5635 150.727   1
   2   0  29 399.048 412.761   4
   2   0  30 7559.30 1178.05   1
   2   0  30 10038.2 1532.23   4
   2   0  31 33.0918 156.670   1
   2   0  31 655.690 451.957   4
   2   0  32 398.967 293.494   1
   2   0  32 308.510 296.995   4
   2   0  33 145.632 201.848   1
   2   0  33 142.370 263.355   4
   2   0  34 1150.02 480.234   1
   2   0  34 2216.17 778.965   4
   2   0  35 535.903 546.959   5
   2   0  36-54.1145 290.494   5
   2   0  37 147.172 437.321   5
  -2  -1  38 315.632 570.750   5
  -2   1  38-1078.40 768.690   5
  -2   1  37-769.124 661.195   5
  -2  -1  37 578.843 685.882   5
  -2  -1  36 1361.35 890.165   5
  -2   1  36 2179.90 1048.59   5
  -2   1  35 1698.93 920.819   5
  -2  -1  35-4.28635 221.903   5
  -2  -1  34 2346.98 1095.35   5
  -2   1  34 3063.46 1172.82   5
  -2  -1  33 915.565 700.644   5
  -2   1  33 557.947 507.117   5
  -2   1  32 3334.59 1238.55   5
  -2  -1  32 1579.81 908.395   5
  -2   1  31 696.048 560.355   5
  -2  -1  31 758.742 594.889   5
   2   1 -30 4314.75 865.974   1
  -2  -1  30 6337.48 1640.59   5
  -2   1  30 7453.76 1665.66   5
   2   1 -29 2659.43 673.576   1
  -2  -1  29 2591.99 1037.54   5
  -2   1  29 2012.95 851.285   5
   2   1 -28 918.991 411.833   1
  -2   1  28 1969.95 814.030   5
  -2  -1  28 971.389 634.536   5
   2   1 -27 7271.58 1090.87   1
  -2   1  27 8759.14 1685.95   5
  -2  -1  27 8688.97 1752.67   5
   2   1 -26-133.378 178.956   1
  -2   1  26-140.547 298.899   5
   2   1 -25 8864.97 1213.55   1
  -2  -1  25 8732.27 1671.50   5
  -2   1  25 11068.0 1820.07   5
  -2   1  25 9881.30 1445.30   4
   2   1 -24 1915.57 560.974   1
  -2  -1  24 1496.31 721.206   5
  -2   1  24 2682.33 858.694   5
   2   1 -24 1160.80 509.975   4
  -2   1  24 2052.27 707.183   4
   2   1 -23 12041.5 1358.12   1
  -2  -1  23 12006.2 1888.56   5
  -2   1  23 12947.5 1829.30   5
   2   1 -23 11330.0 1499.76   4
  -2   1  23 12235.2 1542.03   4
   2   1 -22 252.511 206.269   1
  -2   1  22 1269.29 595.170   5
  -2  -1  22 917.362 532.828   5
   2  -1 -22 384.602 338.948   4
  -2   1  22 143.813 373.289   4
   2   1 -22 427.110 298.249   4
   2   1 -21 11181.6 1278.90   1
  -2   1  21 9372.99 1507.58   5
  -2  -1  21 9754.05 1601.30   5
   2  -1 -21 11312.1 1554.36   4
   2   1 -21 9955.78 1332.49   4
  -2   1  21 10064.3 1327.14   4
   2   1 -20 534.128 218.505   1
  -2   1  20 987.458 494.623   5
  -2  -1  20 1069.05 551.564   5
   2  -1 -20 736.726 461.630   4
   2   1 -20 969.968 439.286   4
  -2   1  20 944.808 528.347   4
   2   1 -19 1642.68 491.225   1
  -2   1  19 1555.92 579.492   5
   2  -1 -19 2169.41 667.337   4
   2   1 -19 1827.94 532.510   4
   2   1 -18-288.419 217.476   1
  -2   1  18 709.230 397.535   5
   2   1 -18 330.073 241.754   4
   2  -1 -18 24.4271 108.994   4
   2   1 -17 5627.25 865.994   1
   2  -1 -17 6086.34 1026.19   4
   2   1 -17 5560.36 866.888   4
   2   1 -16 29597.0 1926.50   1
   2   1 -16 30666.3 1960.28   4
   2  -1 -16 31636.7 2252.83   4
   2   1 -15 2508.93 554.174   1
   2   1 -15 2620.76 697.792   5
   2  -1 -15 2885.43 684.003   4
   2   1 -15 2866.65 594.627   4
   2   1 -14 101314. 3441.85   1
   2   1 -14 106435. 4251.39   5
  -2   1  14 102830. 3975.25   5
   2  -1 -14 105057. 3821.81   4
  -2   1  14 100732. 3309.50   3
   2   1 -13 171634. 4393.57   1
  -2   1  13 173115. 4905.10   5
   2   1 -13 167133. 5207.68   5
   2  -1 -13 172205. 4726.56   4
  -2   1  13 165295. 4149.09   3
  -2   1  12 221.967 184.347   3
   2   1 -12 425.755 227.336   1
   2   1 -12 153.722 251.530   5
   2  -1 -12 590.553 318.013   4
   2   1 -11 24797.1 1573.84   1
  -2   1  11 26122.1 1766.12   5
   2   1 -11 25412.5 1924.21   5
   2  -1 -11 23745.5 1646.20   4
  -2   1  11 22922.5 1476.98   3
   2   1 -10 118637. 3334.59   1
   2   1 -10 114628. 4046.89   5
  -2   1  10 120506. 3600.02   5
   2  -1 -10 115942. 3455.87   4
  -2   1  10 116003. 3232.73   3
  -2   1   9 544.734 243.953   3
  -2   1   9 461.322 266.461   5
   2   1  -9 461.704 314.124   5
   2  -1  -9 986.093 395.492   4
   2   1  -8 36528.1 2179.59   5
  -2   1   8 37722.9 1826.02   5
  -2   1   8 36582.6 1754.93   3
  -2   1   8 38659.1 1781.04   4
   2  -1  -8 37037.8 1790.46   4
   2   1  -7 83403.6 3215.76   5
  -2   1   7 83596.9 2582.48   5
   2  -1  -7 81518.8 2419.19   3
  -2   1   7 81494.5 2409.03   4
   2  -1  -7 84178.3 2561.80   4
  -2   1   7 84920.3 2585.05   3
  -2   1   6 19549.6 1186.70   5
   2   1  -6 18684.2 1505.71   5
   2  -1  -6 18423.5 1139.69   3
  -2   1   6 18545.0 1163.48   4
   2  -1  -6 18978.0 1160.54   4
  -2   1   6 18889.5 1195.77   3
   2   1  -5 207796. 4949.31   5
  -2   1   5 208438. 3616.50   5
   2  -1  -5 209470. 3410.76   5
   2  -1  -5 210166. 3596.17   4
  -2   1   5 213017. 3451.39   4
  -2   1   5 211664. 3936.31   3
  -2  -1   5 211423. 2297.88   3
   2  -1  -5 213771. 3882.76   3
   2   1  -4 244675. 4071.53   2
  -2   1   4 251654. 3680.43   5
   2  -1  -4 242288. 3380.49   5
   2   1  -4 247643. 5350.93   5
   2  -1  -4 240645. 3618.02   4
  -2   1   4 247954. 3477.70   4
  -2  -1   4 249268. 2487.60   3
   2  -1  -4 247619. 4148.74   3
   2   1  -3 25762.8 1297.85   2
  -2   1   3 27216.9 1127.24   5
   2   1  -3 26077.0 1723.22   5
   2  -1  -3 25838.7 1015.00   5
   2  -1  -3 25538.5 1329.43   3
  -2   1   3 26197.2 1048.57   4
   2   1  -3 25226.2 862.438   3
   2  -1  -3 24763.0 1072.43   4
   2   1  -2 313.930 118.404   3
   2   1  -2 323.892 187.214   2
  -2  -1   2 133.421 164.255   2
   2   1  -2 142.180 181.636   5
   2  -1  -2 320.787 122.349   5
  -2   1   2 338.955 150.216   5
   2  -1  -2 327.851 122.454   4
  -2  -1   1 396100. 5005.67   2
   2   1  -1 406699. 5044.28   2
   2  -1  -1 398908. 3833.65   2
   2   1  -1 401903. 6621.50   5
   2  -1  -1 391261. 3516.64   5
  -2   1   1 405800. 3607.70   5
   2  -1  -1 390994. 3535.24   4
   2   1  -1 401416. 3828.13   3
   2   1   0 625478. 6282.47   2
   2  -1   0 618687. 4567.50   2
  -2  -1   0 610422. 6241.82   2
   2  -1   0 600455. 4466.00   5
   2   1   0 615904. 8157.95   5
   2  -1   0 612907. 3819.00   4
  -2   1  -1 34258.7 1093.40   2
  -2  -1  -1 36806.2 1564.22   2
   2  -1   1 35491.7 1089.25   2
   2   1   1 36926.0 1566.79   2
   2   1   1 37280.4 1974.08   5
  -2   1  -2 506150. 4289.47   2
  -2  -1  -2 496559. 5936.43   2
   2   1   2 499720. 5999.72   2
   2   1   3 226654. 4133.73   2
  -2  -1  -3 228334. 4166.70   2
   2  -1   3 231871. 3061.25   2
  -2   1  -3 229682. 3054.21   2
  -2   1  -4 470007. 4756.04   2
  -2  -1  -4 472283. 6229.71   2
   2  -1   4 475598. 4659.65   2
   2  -1   5 8880.91 690.266   2
  -2  -1  -5 9291.28 910.055   2
  -2   1  -5 8479.62 688.865   2
  -2  -1  -6 126693. 3490.62   2
   2  -1   6 130708. 2845.58   2
  -2   1  -6 132076. 2872.20   2
   2  -1   6 128275. 1651.25   4
   2  -1   7 290568. 5053.66   1
   2  -1   7 287696. 4418.10   2
  -2   1  -7 278119. 4454.24   2
  -2  -1  -7 288344. 5437.34   2
   2  -1   7 282728. 2818.04   4
   2  -1   8 14818.5 1190.04   1
  -2   1  -8 14110.5 1047.69   2
  -2  -1  -8 15018.3 1298.29   2
   2  -1   8 13851.0 733.660   4
  -2   1  -8 13928.1 772.606   4
   2   1   8 14761.5 1284.56   4
   2  -1   9 9106.15 981.669   1
  -2   1  -9 9628.51 919.419   2
  -2  -1  -9 9502.63 1071.35   2
  -2   1  -9 10022.0 716.507   4
   2  -1   9 9627.29 654.544   4
   2  -1  10 501.880 212.187   1
  -2   1 -10 335.810 196.720   2
  -2  -1 -10 346.054 199.321   2
   2  -1  10 557.590 193.264   4
  -2   1 -10 496.632 193.764   4
  -2  -1 -11 2590.68 599.857   2
   2  -1  11 2415.69 528.962   1
  -2   1 -11 3112.09 594.315   2
  -2   1 -11 2775.73 438.858   4
   2  -1  11 2733.08 409.588   4
   2  -1  12 6006.53 842.176   1
  -2  -1 -12 6109.68 948.644   2
  -2   1 -12 6956.19 919.667   2
  -2   1 -12 6569.22 719.682   4
   2  -1  12 6920.90 689.171   4
   2  -1  13 81291.6 3137.16   1
  -2   1 -13 80987.0 3249.49   2
  -2  -1 -13 86518.8 3658.59   2
   2   1  13 89353.5 3519.96   4
   2  -1  13 83772.7 2415.16   4
  -2   1 -13 82500.9 2627.01   4
  -2  -1 -14 137.367 273.431   2
  -2   1 -14-16.2972 171.618   2
  -2   1 -14 826.380 317.159   4
   2   1  14 20.9816 324.111   4
   2  -1  14 579.829 316.962   4
  -2   1 -15 2740.76 653.952   2
  -2  -1 -15 3277.02 758.003   2
   2  -1  15 2827.74 502.034   4
  -2   1 -15 3126.95 574.149   4
   2   1  15 3943.13 779.176   4
  -2   1 -16 3132.45 693.801   2
  -2  -1 -16 3118.63 785.488   2
  -2   1 -16 3212.97 604.493   4
   2  -1  16 3051.36 549.956   4
   2   1  16 2933.89 693.276   4
  -2  -1 -17 6884.15 1174.04   2
  -2   1 -17 5946.41 997.976   2
   2   1  17 6344.47 1057.76   4
  -2   1 -17 6606.52 902.361   4
   2  -1  17 5557.85 749.483   4
  -2   1 -18-42.7746 150.982   2
  -2  -1 -18 208.391 273.777   2
   2  -1  18-39.5616 133.590   4
  -2   1 -18-186.883 191.651   4
   2   1  18 175.920 322.963   4
  -2   1 -19 2232.18 686.534   2
  -2  -1 -19 2106.68 682.659   2
   2  -1  19 1890.30 498.342   4
  -2   1 -19 2030.91 550.667   4
   2   1  19 1515.56 554.075   4
   2   1  20 7533.23 842.674   1
   2  -1  20 8471.66 1187.82   1
  -2  -1 -20 8600.60 1436.81   2
  -2   1 -20 8142.88 1308.89   2
   2  -1  20 8322.97 1014.27   4
  -2   1 -20 7765.13 1090.83   4
   2   1  20 8087.00 1236.55   4
   2   1  21 14429.0 1206.16   1
   2  -1  21 13955.2 1575.86   1
  -2   1 -21 13694.3 1739.25   2
   2  -1  21 16339.6 1458.77   4
   2   1  21 15570.3 1752.59   4
  -2   1 -21 14187.0 1507.36   4
   2   1  22 12854.6 1160.10   1
   2  -1  22 12916.5 1529.95   1
  -2   1 -22 14022.9 1800.79   2
   2   1  22 12783.6 1647.31   4
   2  -1  22 13310.7 1343.02   4
  -2   1 -22 13895.7 1553.34   4
   2  -1  23 1196.71 487.147   1
  -2   1 -23 549.689 397.259   2
   2   1  23 814.820 291.986   1
   2  -1  23 1860.02 520.575   4
   2   1  23 1643.25 671.643   4
  -2   1 -23 542.021 342.731   4
   2  -1  24 8080.10 1264.72   1
   2   1  24 7769.48 941.015   1
   2   1  24 7384.33 1288.47   4
  -2   1 -24 7965.89 1253.57   4
   2   1  25 3598.49 666.506   1
   2  -1  25 3269.44 844.522   1
   2   1  25 4771.38 1098.47   4
  -2   1 -25 4322.21 962.148   4
   2  -1  26 12027.1 1584.94   1
   2   1  26 12819.4 1234.32   1
  -2   1 -26 15016.9 1816.32   4
   2   1  26 13412.7 1777.79   4
   2  -1  27 1778.56 634.089   1
   2   1  27 1581.19 456.220   1
   2   1  27 2415.85 833.044   4
  -2   1 -27 1444.52 638.880   4
   2  -1  28 1011.66 494.461   1
   2   1  28 1462.65 454.306   1
   2   1  28 1243.64 596.430   4
   2  -1  29 2616.11 799.673   1
   2  -1  29 2739.50 998.807   5
   2   1  29 1554.09 674.335   4
   2  -1  30 313.116 342.206   1
   2  -1  30 86.2824 288.876   5
   2   1  30 468.429 417.997   4
   2  -1  31 1205.80 540.310   1
   2  -1  31 627.925 527.473   5
   2   1  31 836.965 535.807   4
   2  -1  32 3761.48 979.804   1
   2  -1  32 3611.38 1109.26   5
   2   1  32 4542.48 1133.20   4
   2  -1  33 1710.22 680.681   1
   2  -1  33 3993.60 1302.66   5
   2   1  33 2916.02 943.585   4
   2  -1  34 270.283 283.063   1
   2  -1  34-76.2615 394.912   5
   2   1  34 724.593 501.062   4
   2  -1  35 426.006 336.494   1
   2  -1  35 1753.36 942.864   5
   2   1  35 836.329 548.952   4
   2  -1  36 1684.79 662.745   1
   2  -1  36 2103.44 1010.74   5
   2   1  36 3140.58 1048.03   4
   2  -1  37 165.474 418.819   5
   2   1  37 805.786 529.804   4
   2   1  38 4391.18 1293.60   4
   2   1  39 1071.74 626.472   4
  -2   2  38 1035.28 731.462   5
  -2   2  37-4.34441 415.028   5
  -2  -2  37-1321.12 922.609   5
  -2   2  36 116.502 321.640   5
  -2  -2  36-4.72575 452.794   5
  -2   2  35 3012.25 1181.65   5
  -2  -2  35 2259.70 1160.92   5
  -2  -2  34 5054.66 1636.22   5
  -2   2  34 6201.71 1660.72   5
  -2   2  33 3325.08 1202.04   5
  -2  -2  33 3995.01 1414.37   5
  -2   2  33 2875.62 980.146   4
  -2  -2  32 1746.29 853.508   5
  -2   2  32 1552.58 902.326   5
  -2   2  32 440.896 413.478   4
  -2   2  31 525.357 486.448   5
  -2  -2  31-3.86576 291.779   5
  -2   2  31-603.019 460.709   4
  -2   2  30 1170.79 655.847   5
  -2  -2  30 155.936 413.900   5
  -2   2  29 502.325 387.788   5
  -2   2  29 454.672 439.505   4
  -2   2  28 3330.64 1100.47   5
  -2  -2  28 3109.88 1139.25   5
  -2   2  28 2937.05 888.711   4
  -2   2  27 2124.90 834.689   5
  -2  -2  27 879.697 644.240   5
  -2   2  27 2014.47 707.675   4
   2   2 -26 3744.16 929.938   1
  -2  -2  26 3457.48 1182.53   5
  -2   2  26 3824.24 1095.67   5
  -2   2  26 3323.19 937.965   4
   2   2 -25 2811.59 798.801   1
  -2   2  25 4177.85 1133.76   5
  -2  -2  25 3267.00 1083.64   5
  -2   2  25 3668.97 941.178   4
   2   2 -24 5672.92 1123.15   1
  -2   2  24 6538.59 1337.87   5
  -2  -2  24 4809.91 1279.03   5
   2   2 -24 5724.88 1075.54   4
  -2   2  24 5958.43 1155.40   4
   2   2 -23 7987.27 1318.97   1
  -2   2  23 8059.42 1481.07   5
  -2  -2  23 7109.14 1574.85   5
  -2   2  23 8814.09 1419.91   3
   2   2 -23 8225.93 1246.24   4
  -2   2  23 8168.76 1364.67   4
   2   2 -22 7447.14 1252.56   1
  -2  -2  22 9276.98 1746.76   5
  -2   2  22 8076.05 1428.90   5
   2   2 -22 8175.12 1213.62   4
  -2   2  22 8856.06 1396.48   3
  -2   2  22 10545.9 1497.14   4
   2   2 -21 8037.56 1285.61   1
  -2   2  21 6415.64 1259.31   5
  -2  -2  21 9244.26 1671.86   5
  -2   2  21 7299.91 1244.73   3
   2   2 -21 9130.06 1237.38   4
  -2   2  21 8367.28 1314.09   4
   2   2 -20 10147.0 1439.65   1
  -2  -2  20 8562.74 1630.96   5
  -2   2  20 10518.1 1533.60   5
  -2   2  20 9374.00 1399.71   3
   2   2 -20 9397.96 1218.09   4
  -2   2  20 8693.85 1308.47   4
  -2   2  19-133.666 195.707   3
   2   2 -19 536.391 345.802   1
  -2   2  19 791.958 435.217   5
  -2  -2  19 201.851 493.500   5
   2   2 -19 241.040 212.380   4
   2  -2 -19 326.454 305.564   4
  -2   2  19 459.263 482.793   4
   2   2 -18 43917.7 2921.98   1
  -2  -2  18 43329.6 3423.69   5
  -2   2  18 43723.2 2919.23   5
  -2   2  18 43299.9 2862.81   3
  -2   2  18 44729.0 2821.49   4
   2  -2 -18 45561.7 3081.62   4
   2   2 -17 7952.77 1241.79   1
  -2  -2  17 5873.40 1268.81   5
   2   2 -17 4715.25 1050.46   5
  -2   2  17 7162.87 1143.60   3
  -2   2  17 6084.79 1070.71   4
   2  -2 -17 6735.65 1170.08   4
   2   2 -16 13040.2 1539.63   1
   2   2 -16 12632.6 1677.53   5
  -2  -2  16 15492.4 1990.35   5
  -2   2  16 13534.6 1503.93   4
   2  -2 -16 14971.1 1676.78   4
  -2   2  16 14131.2 1575.44   3
   2   2 -15 8795.05 1244.42   1
   2   2 -15 8933.51 1389.24   5
  -2  -2  15 9683.84 1531.80   5
  -2   2  15 9708.36 1236.42   4
  -2   2  15 7862.27 1155.60   3
   2  -2 -15 10522.9 1376.60   4
   2   2 -14 13206.2 1499.38   1
   2   2 -14 14440.8 1666.30   5
  -2  -2  14 13534.2 1804.26   5
   2  -2 -14 13090.8 1485.59   4
  -2   2  14 12479.2 1439.75   3
  -2   2  13 1715.39 506.559   3
   2   2 -13 1977.62 584.477   1
  -2  -2  13 862.294 341.343   5
   2   2 -13 1341.94 508.740   5
   2  -2 -13 1540.35 497.214   4
   2   2 -12 8913.23 1198.51   1
  -2  -2  12 9690.31 1460.56   5
   2   2 -12 8074.58 1205.84   5
   2  -2 -12 10137.2 1215.75   4
  -2   2  12 9270.38 1184.40   3
   2  -2 -11 13539.6 695.280   1
   2   2 -11 14633.5 1488.23   1
  -2  -2  11 13764.3 1681.66   5
   2   2 -11 12020.4 1470.65   5
   2  -2 -11 14245.6 1405.49   4
  -2   2  11 13150.2 1387.95   3
   2   2 -10 32101.7 2173.24   1
   2  -2 -10 32097.8 1207.55   1
   2   2 -10 33681.9 2399.18   5
  -2  -2  10 31996.2 2510.53   5
  -2   2  10 32218.6 1947.76   4
   2  -2 -10 34913.1 2124.19   4
  -2   2  10 32546.5 2131.51   3
   2   2  -9 7979.75 1071.97   1
   2  -2  -9 7637.78 627.781   1
  -2  -2   9 7680.38 1221.56   5
   2   2  -9 7865.00 1157.28   5
  -2   2   9 7283.22 918.898   4
   2  -2  -9 7334.06 948.949   4
   2  -2  -9 7218.40 965.588   3
  -2   2   9 7698.35 1042.68   3
   2  -2  -8 1856.85 515.892   3
  -2   2   8 1032.12 399.555   3
   2  -2  -8 1738.70 329.271   1
   2   2  -8 1646.04 490.410   1
   2   2  -8 1880.22 595.044   5
  -2  -2   8 1656.19 633.653   5
  -2   2   8 1295.59 403.798   4
   2  -2  -8 1767.35 460.677   4
   2  -2  -7 326.737 167.086   1
   2   2  -7 591.576 294.703   1
  -2   2   7 239.730 167.275   5
   2   2  -7 254.919 230.236   5
  -2  -2   7 362.661 199.669   5
  -2   2   7 378.495 288.074   3
  -2   2   7 135.125 158.933   4
   2  -2  -7 501.321 267.554   4
  -2  -2   7 308.691 184.951   3
   2   2  -6 179.555 137.662   2
  -2  -2   6-10.5050 146.921   3
   2  -2  -6 168.797 155.836   1
   2   2  -6 169.342 185.249   5
  -2  -2   6 505.047 391.009   5
  -2   2   6 98.1631 126.542   5
  -2   2   6 278.378 214.559   4
   2  -2  -6 39.5706 139.503   4
  -2   2   6 160.617 133.916   3
  -2  -2   5 1441.42 315.966   3
   2   2  -5 2078.06 414.766   2
   2  -2  -5 1650.80 369.612   1
  -2   2   5 1771.32 295.839   5
  -2  -2   5 1500.26 480.125   5
   2   2  -5 1608.89 534.462   5
  -2   2   5 1955.03 486.901   4
   2  -2  -5 1537.64 366.723   4
   2   2  -4 95847.3 2754.01   2
   2  -2  -4 100985. 2782.14   1
   2   2  -4 97951.4 3860.10   5
  -2  -2   4 102484. 3991.10   5
  -2   2   4 97981.0 1880.96   5
  -2   2   4 99032.6 2660.18   4
   2  -2  -4 98118.7 2815.38   4
  -2  -2   4 98953.4 2732.98   3
   2   2  -3 14645.5 1067.82   2
   2  -2  -3 15459.9 1123.60   1
   2   2  -3 14229.5 1471.49   5
  -2  -2   3 13463.7 1430.80   5
  -2  -2   3 14390.2 1039.40   3
  -2   2   3 14372.7 979.138   4
   2  -2  -3 13713.1 1009.63   4
  -2  -2   2 2108.87 417.505   2
   2   2  -2 1793.67 386.533   2
  -2  -2   2 1879.65 396.925   3
   2  -2  -2 1603.14 383.480   1
   2   2  -2 1727.97 538.468   5
  -2  -2   2 1943.69 558.281   5
  -2   2   2 1811.06 330.979   4
   2  -2  -2 2087.46 362.251   4
   2   2  -2 2036.21 425.385   3
  -2  -2   1 1891.43 394.192   2
   2   2  -1 1840.54 400.599   3
   2   2  -1 1742.91 377.148   2
  -2  -2   1 1878.21 383.854   3
   2  -2  -1 1683.81 404.583   1
   2   2  -1 1315.20 450.345   5
  -2   2   1 1682.67 306.756   4
  -2  -2   1 1054.66 388.055   5
   2   2   0 2796.83 501.684   3
  -2  -2   0 2999.59 502.073   2
   2   2   0 2689.99 480.966   2
   2  -2   0 2534.00 542.180   1
   2   2   0 3400.77 721.912   5
  -2   2   0 3537.60 410.782   4
  -2  -2  -1 25379.9 1445.40   2
   2   2   1 27106.0 1533.55   2
  -2   2  -1 26815.8 1592.01   1
   2  -2   1 27247.8 1678.94   1
   2   2   1 26679.4 2022.31   5
   2   2   1 26174.5 1565.59   3
  -2   2  -1 28384.1 990.867   4
  -2  -2  -2 19659.1 1315.69   2
   2   2   2 21510.1 1395.25   2
  -2   2  -2 21381.9 1460.85   1
   2  -2   2 21213.8 1527.60   1
   2   2   2 20666.8 1768.56   5
   2   2   2 21149.8 1427.96   3
  -2   2  -2 22052.9 774.529   4
  -2  -2  -3 47281.0 2089.51   2
   2   2   3 49461.5 2155.76   2
  -2   2  -3 49449.4 2266.87   1
   2  -2   3 48914.3 1280.65   5
   2   2   3 48007.6 2687.73   5
  -2   2  -3 47044.1 954.686   4
   2   2   3 48284.5 2210.56   3
  -2   2  -4 294.810 96.8889   2
   2   2   4 156.832 130.182   3
  -2  -2  -4 411.084 208.639   2
   2  -2   4 372.764 165.931   5
   2   2   4 194.584 189.490   2
  -2   2  -4 344.273 230.264   1
   2   2   5 548.347 303.115   3
  -2   2  -5 130.552 71.7651   2
  -2  -2  -5 295.178 240.618   2
   2  -2   5 156.378 99.0447   5
   2   2   5 81.4656 200.513   2
  -2   2  -5 315.000 208.598   1
  -2  -2  -6 260.324 180.492   2
  -2   2  -6 278.559 122.238   2
   2  -2   6 131.768 139.562   5
   2   2   6 389.378 236.701   2
  -2   2  -6 236.169 183.072   1
  -2   2  -7 24699.5 1137.59   2
  -2  -2  -7 26772.7 1798.56   2
   2   2   7 22800.1 1676.90   2
   2  -2   7 24494.6 1377.06   5
  -2   2  -7 24455.1 1717.72   1
  -2   2  -8 13400.0 920.163   2
  -2  -2  -8 13677.6 1328.17   2
   2   2   8 13003.7 1294.01   2
  -2   2  -8 16532.4 1463.64   1
   2  -2   8 13907.9 1115.08   5
  -2  -2  -9 13186.3 1356.65   2
   2   2   9 13104.3 1356.60   2
  -2   2  -9 12811.1 960.750   2
   2  -2   9 14019.1 1172.02   5
  -2   2  -9 13446.2 605.048   4
  -2   2 -10 16335.4 1155.75   2
  -2  -2 -10 14547.5 1462.18   2
   2  -2  10 15273.0 1306.18   5
  -2   2 -10 15995.0 754.039   4
  -2  -2 -11 9301.39 1197.49   2
  -2   2 -11 9783.72 942.997   2
   2  -2  11 9079.92 1060.42   5
  -2   2 -11 8686.05 618.467   4
  -2  -2 -12 460.473 228.217   2
  -2   2 -12 783.459 290.633   2
   2  -2  12 702.974 362.949   5
  -2   2 -12 660.414 197.255   4
  -2  -2 -13 436.994 280.099   2
  -2   2 -13 929.687 338.451   2
   2  -2  13 521.166 338.793   1
   2  -2  13 1154.40 465.638   5
  -2   2 -13 1029.33 258.691   4
  -2  -2 -14 2866.36 731.668   2
  -2   2 -14 2586.74 565.316   2
   2  -2  14 1799.54 581.691   1
   2  -2  14 2647.61 694.246   5
  -2   2 -14 2593.02 427.653   4
  -2  -2 -15 2935.87 754.419   2
   2  -2  15 2286.69 685.572   1
  -2   2 -15 2824.09 611.024   2
   2  -2  15 3515.53 761.696   5
  -2   2 -15 2803.01 475.381   4
  -2  -2 -16 567.776 357.487   2
  -2   2 -16-28.5025 178.055   2
   2  -2  16 500.435 531.272   1
   2  -2  16 356.638 314.148   5
   2   2  16-142.749 250.959   4
  -2   2 -16 163.906 148.891   4
  -2  -2 -17 2621.39 777.136   2
   2  -2  17 2810.12 780.834   1
  -2   2 -17 2094.04 584.504   2
   2  -2  17 2250.28 759.785   5
  -2   2 -17 1788.25 433.450   4
   2   2  17 2051.02 675.259   4
  -2   2 -18 20192.1 1840.96   2
  -2  -2 -18 21920.8 2213.94   2
   2  -2  18 20630.3 2033.01   1
   2  -2  18 19822.3 1993.93   5
   2   2  18 21910.3 2165.55   4
  -2   2 -18 19677.0 1440.85   4
  -2   2 -19 4480.60 915.701   2
  -2  -2 -19 5591.97 1125.31   2
   2  -2  19 5107.23 1075.38   1
   2  -2  19 4675.69 1041.41   5
  -2   2 -19 5498.24 803.133   4
   2   2  19 4000.00 940.128   4
   2  -2  20 4002.48 931.660   1
  -2   2 -20 2207.85 677.985   2
   2  -2  20 3644.79 929.986   5
  -2   2 -20 3007.86 617.896   4
   2   2  20 2802.91 822.983   4
  -2   2 -21 13596.6 1681.28   2
   2  -2  21 13790.7 1770.03   1
   2  -2  21 13182.9 1822.70   5
  -2   2 -21 12668.9 1309.68   4
   2   2  21 15032.0 1895.15   4
  -2   2 -22 13253.8 1698.77   2
   2  -2  22 10078.3 1522.94   1
   2  -2  22 12225.8 1768.94   5
  -2   2 -22 12649.0 1358.78   4
   2   2  22 12259.9 1742.90   4
   2  -2  23 1680.68 654.683   1
  -2   2 -23 747.586 423.714   2
   2  -2  23 1473.76 667.193   5
   2   2  23 1710.05 717.950   4
  -2   2 -23 1230.83 468.260   4
  -2   2 -24 1039.91 514.493   2
   2  -2  24 510.009 416.768   1
   2   2  24 678.074 261.275   1
   2  -2  24 2024.16 811.594   5
   2   2  24 702.380 484.350   4
  -2   2 -24 893.950 398.474   4
   2   2  25 208.409 176.614   1
   2  -2  25 1026.88 552.345   1
   2  -2  25 401.461 428.650   5
   2   2  25 384.548 366.247   4
  -2   2 -25 535.339 313.501   4
   2   2  26 6067.49 708.031   1
   2  -2  26 4769.77 1099.08   1
   2  -2  26 4354.51 1171.74   5
   2   2  26 6383.75 1336.16   4
  -2   2 -26 5132.79 996.827   4
   2   2  27 611.996 220.945   1
   2  -2  27 858.949 545.621   1
   2  -2  27 182.517 334.776   5
   2   2  27 854.632 546.003   4
  -2   2 -27 1041.48 470.507   4
   2  -2  28-556.879 425.732   1
   2   2  28 151.410 104.216   1
   2  -2  28-404.206 432.159   5
   2   2  28-108.457 268.242   4
  -2   2 -28-405.890 322.941   4
   2  -2  29 3767.11 1024.21   1
   2   2  29 3308.08 526.262   1
   2  -2  29 4435.31 1263.00   5
   2   2  29 3544.80 1085.37   4
   2  -2  30 1186.52 577.476   1
   2  -2  30 660.040 505.578   5
   2   2  30 376.420 452.827   4
   2  -2  31-9.74404 279.014   1
   2  -2  31 744.778 570.578   5
   2   2  31 116.345 281.398   4
   2  -2  32-893.506 516.723   1
   2   2  32-77.9671 306.372   4
   2  -2  33 467.353 398.394   1
   2  -2  33 317.883 464.365   5
   2   2  33 1143.73 666.935   4
   2  -2  34 342.017 365.761   1
   2  -2  34-183.967 384.709   5
   2   2  34 316.782 321.779   4
   2  -2  35 2428.46 870.762   1
   2  -2  35 2391.16 1070.60   5
   2   2  35 2329.67 917.437   4
   2  -2  36 411.483 437.881   1
   2  -2  36-459.351 508.421   5
   2   2  36-896.110 597.135   4
   2  -2  37 453.849 411.308   1
   2  -2  37 637.724 596.824   5
   2  -2  38 2.68461 288.598   1
  -2   3  37-100.941 230.397   5
  -2   3  36 1778.42 933.283   5
  -2  -3  36 1640.61 1040.58   5
  -2   3  35 157.538 312.139   5
  -2  -3  35 2155.02 1139.52   5
  -2   3  34 1071.10 704.261   5
  -2   3  34 1012.65 596.675   4
  -2   3  33 199.976 374.252   5
  -2   3  33-193.544 334.848   4
  -2  -3  32 2231.87 1126.61   5
  -2   3  32-201.918 292.216   5
  -2   3  32 1143.30 622.578   4
  -2   3  31 4962.42 1411.79   5
  -2  -3  31 7807.87 2020.63   5
  -2   3  31 6152.29 1439.70   4
  -2   3  30 2655.74 998.038   5
  -2  -3  30 3906.74 1397.61   5
  -2   3  30 2813.46 951.357   4
  -2   3  29-252.682 352.053   5
  -2  -3  29 458.932 560.880   5
  -2   3  29 143.559 207.984   4
  -2  -3  28 1779.42 924.422   5
  -2   3  28 652.065 482.192   5
  -2   3  28 467.147 419.993   4
  -2   3  27 3381.06 1077.95   5
  -2  -3  27 4154.64 1375.79   5
  -2   3  27 3526.20 1015.21   4
  -2   3  26-18.6770 232.752   5
  -2  -3  26 1225.78 748.582   5
  -2   3  26 996.614 522.486   4
  -2   3  25 711.388 463.916   5
  -2  -3  25 703.042 648.113   5
  -2   3  25-303.940 360.138   4
  -2   3  24 1369.58 641.550   5
  -2  -3  24 1882.33 863.595   5
  -2   3  24 1269.99 615.930   4
  -2   3  23 896.742 512.773   5
  -2  -3  23 1167.85 716.206   5
   2   3 -23 1128.80 465.214   4
  -2   3  23 1215.62 584.814   4
  -2  -3  22 25968.6 3090.74   5
  -2   3  22 23123.3 2371.81   4
   2   3 -22 23535.8 2046.97   4
  -2  -3  21 18578.6 2578.20   5
  -2   3  21 17752.6 2053.93   4
   2  -3 -20 890.197 473.199   2
  -2  -3  20-219.627 383.254   5
  -2   3  20 366.957 393.314   4
   2  -3 -19 4643.35 1021.73   2
  -2  -3  19 3277.24 1097.61   5
  -2   3  19 2109.70 711.269   4
   2   3 -18-207.729 277.309   5
  -2  -3  18 222.898 553.171   5
  -2   3  18 173.361 289.842   4
  -2  -3  17 8357.59 1613.88   5
   2   3 -17 9644.96 1564.37   5
   2  -3 -17 7937.22 1362.71   4
  -2   3  17 7654.32 1277.80   4
  -2   3  17 9163.19 1485.52   3
  -2   3  16 3355.81 910.014   3
   2   3 -16 4390.39 1028.41   1
   2   3 -16 3997.13 967.771   5
  -2  -3  16 2535.88 909.709   5
  -2   3  16 4032.52 922.393   4
   2  -3 -16 3163.10 865.251   4
  -2   3  15 5824.50 1154.24   3
   2   3 -15 5770.49 1161.92   1
  -2  -3  15 5220.94 1221.46   5
   2   3 -15 6316.92 1222.71   5
  -2   3  15 4720.62 953.632   4
   2  -3 -15 5602.23 1094.88   4
  -2   3  14 1098.94 542.135   3
   2   3 -14 1140.28 527.086   1
   2   3 -14 569.620 356.609   5
  -2  -3  14 897.041 536.270   5
   2  -3 -14 699.526 386.280   4
  -2   3  14 1134.93 470.476   4
   2   3 -13 12123.3 1638.09   1
  -2  -3  13 9268.26 1552.36   5
   2   3 -13 9600.91 1466.78   5
   2  -3 -13 10402.7 1428.47   4
  -2   3  13 9736.75 1300.07   4
  -2   3  13 11213.1 1555.20   3
   2   3 -12 13345.4 1686.55   1
   2   3 -12 11772.1 1575.24   5
  -2  -3  12 12370.1 1803.18   5
   2  -3 -12 12351.5 1486.32   4
  -2   3  12 11915.3 1587.85   3
  -2   3  12 10982.4 1356.44   4
  -2   3  11 678.154 378.125   3
   2   3 -11 436.244 369.979   1
   2   3 -11 175.655 214.135   5
  -2  -3  11 98.3769 303.536   5
   2  -3 -11 437.020 247.283   4
  -2  -3  11-106.322 190.627   3
   2   3 -10 19788.5 1516.03   2
   2   3 -10 21160.1 2075.55   1
  -2  -3  10 18579.0 2086.67   5
   2   3 -10 19083.9 1964.44   5
   2  -3 -10 20788.9 1866.08   4
  -2  -3  10 20428.7 1598.58   3
  -2   3  10 21375.0 2066.41   3
   2   3  -9-151.189 183.760   2
   2  -3  -9 63.4293 176.488   2
   2   3  -9 234.090 253.378   1
   2  -3  -9 136.815 149.184   1
  -2  -3   9-95.1775 400.217   5
   2   3  -9 76.4056 212.674   5
  -2   3   9 333.140 289.374   3
   2  -3  -9-47.9596 135.619   4
  -2  -3   9 157.791 167.331   3
  -2  -3   8-69.7174 161.753   3
   2   3  -8 78.0732 169.909   2
   2  -3  -8-17.1511 114.001   1
   2  -3  -8-85.3348 125.763   2
   2   3  -8-468.556 315.983   1
   2   3  -8-209.382 233.250   5
  -2   3   8 91.3254 153.454   3
   2  -3  -7 18285.7 1236.93   2
   2   3  -7 18535.4 1364.94   2
  -2   3   7 18927.4 1316.53   1
   2   3  -7 19579.0 1909.95   1
   2  -3  -7 20569.0 1465.20   1
  -2  -3   7 19260.3 2016.90   5
   2   3  -7 18655.9 1896.80   5
  -2   3   7 18043.4 1497.01   4
  -2   3   7 19267.0 1908.94   3
  -2  -3   7 20011.7 1561.33   3
   2   3  -6 1085.64 332.944   2
  -2  -3   6 632.859 313.621   3
   2   3  -6 1182.02 474.083   1
   2  -3  -6 859.970 252.298   2
   2  -3  -6 1566.21 425.569   1
  -2   3   6 1093.20 344.281   1
   2   3  -6 1413.94 533.533   5
  -2  -3   6 1057.97 482.126   5
  -2   3   6 923.522 388.153   4
  -2  -3   5 258.612 222.497   3
   2   3  -5 223.087 188.521   2
   2   3  -5 380.887 290.638   1
   2  -3  -5 381.602 233.097   1
   2  -3  -5 395.238 172.977   2
  -2   3   5 537.454 257.388   1
   2   3  -5 53.1294 230.417   5
  -2  -3   5 135.127 407.682   5
  -2   3   5 267.368 199.511   4
   2  -3  -4 7338.91 634.555   2
   2   3  -4 7874.15 863.499   2
   2   3  -4 8463.86 1206.97   1
  -2   3   4 8761.77 991.506   1
   2  -3  -4 8526.89 1027.59   1
   2   3  -4 8112.18 1242.40   5
  -2   3   4 7775.80 617.547   5
  -2  -3   4 8492.17 1298.13   5
  -2   3   4 7582.08 894.153   4
  -2  -3   4 8085.65 1019.07   3
   2   3  -3 47743.1 2139.71   2
   2  -3  -3 47149.7 1417.38   2
   2   3  -3 50365.7 2888.42   1
  -2   3   3 48507.7 2375.34   1
   2  -3  -3 52021.7 2557.27   1
  -2  -3   3 48899.9 3004.95   5
   2   3  -3 47443.9 3003.49   5
  -2  -3   3 46353.0 2390.38   3
  -2   3   3 49312.6 2176.41   4
   2  -3  -2 53295.6 1237.97   2
   2   3  -2 53654.0 2294.58   2
  -2  -3   2 51629.2 2183.34   2
  -2   3   2 56261.6 2610.38   1
   2   3  -2 57327.3 3033.24   1
   2  -3  -2 58784.8 2778.18   1
   2   3  -2 53796.4 3216.39   5
  -2  -3   2 57089.9 3233.83   5
  -2   3   2 53814.7 2189.26   4
  -2  -3   2 52387.7 2552.91   3
   2   3  -1 19738.7 1407.38   2
  -2  -3   1 18127.0 1311.62   2
   2   3  -1 20791.3 1786.65   1
  -2   3   1 18450.9 1528.49   1
   2  -3  -1 17532.7 1572.01   1
   2   3  -1 18815.7 1910.13   5
  -2   3   1 18605.0 1245.75   4
  -2  -3   1 19341.5 1577.17   3
   2   3  -1 19002.4 1623.96   3
  -2  -3   0 5700.67 748.399   2
   2   3   0 3662.00 620.079   2
   2   3   0 6571.10 991.685   1
  -2   3   0 6239.45 906.648   1
   2  -3   0 5814.72 945.805   1
   2   3   0 4881.00 987.660   5
  -2   3   0 5248.97 642.370   4
   2   3   0 5331.01 881.302   3
   2   3   1 32650.1 1861.30   2
  -2  -3  -1 31770.0 1780.60   2
  -2   3  -1 34405.2 2167.53   1
   2  -3   1 34236.5 2250.77   1
   2   3   1 32607.4 2531.89   5
   2   3   1 32363.2 2172.86   3
  -2   3  -1 32939.7 1497.17   4
  -2  -3  -2 13439.8 1182.73   2
   2   3   2 13554.0 1214.14   2
  -2   3  -2 14110.3 1414.90   1
   2  -3   2 15098.6 1530.62   1
   2   3   2 13908.0 1674.07   5
  -2   3  -2 13337.8 913.280   4
   2   3   2 15830.2 1542.27   3
  -2  -3  -3 4801.28 735.108   2
   2   3   3 4985.48 887.632   3
   2   3   3 4053.18 688.768   2
   2  -3   3 3679.82 812.184   1
  -2   3  -3 5229.47 876.721   1
   2   3   3 5806.27 1096.67   5
  -2   3  -3 4413.47 493.357   4
  -2  -3  -4 574.171 275.758   2
   2   3   4 365.346 301.154   3
  -2   3  -4 774.182 358.186   1
   2  -3   4 803.643 409.671   1
   2   3   4 369.050 161.001   2
   2  -3   4 892.084 227.388   5
  -2   3  -4 751.438 209.615   4
   2   3   4 751.743 409.519   5
   2   3   5 7407.63 980.247   2
  -2  -3  -5 7516.39 969.321   2
  -2   3  -5 7658.67 1113.72   1
   2  -3   5 6867.08 699.506   5
   2   3   5 8180.97 1292.14   5
  -2   3  -5 7136.57 567.017   4
   2   3   5 8202.31 1166.12   3
   2   3   6 18439.5 1598.48   2
  -2  -3  -6 19099.5 1588.16   2
  -2   3  -6 19336.3 1787.59   1
   2  -3   6 18923.7 1253.55   5
   2   3   6 17872.3 1754.16   3
   2   3   6 20091.2 2064.42   5
  -2   3  -6 19022.0 877.102   4
  -2  -3  -7-38.0647 139.379   2
   2   3   7-187.854 209.061   3
   2  -3   7 99.9449 190.326   5
  -2   3  -7-5.71047 182.252   1
  -2   3  -8 4640.06 398.309   2
  -2  -3  -8 4162.12 784.287   2
   2   3   8 3968.49 859.660   3
  -2   3  -8 4898.74 935.583   1
   2  -3   8 2725.78 588.692   5
  -2   3  -9 39279.3 1358.01   2
  -2  -3  -9 36038.3 2391.56   2
  -2   3  -9 42651.6 2769.51   1
   2  -3   9 35120.5 2043.70   5
   2   3   9 39562.4 2719.69   3
   2   3   9 35286.1 2625.12   4
   2   3  10 530.788 352.595   3
  -2   3 -10 332.301 157.908   2
  -2  -3 -10 270.468 243.989   2
  -2   3 -10 492.034 308.704   1
   2  -3  10 215.926 253.396   5
   2   3  10 371.083 355.191   4
  -2   3 -10 255.236 100.466   4
   2   3  11 1588.45 565.026   3
  -2  -3 -11 2175.48 618.917   2
  -2   3 -11 2484.06 718.604   1
  -2   3 -11 1733.65 355.002   2
   2  -3  11 924.675 386.740   5
  -2   3 -11 1574.33 244.290   4
   2   3  11 2231.83 736.474   4
   2   3  12 1921.57 683.097   3
  -2   3 -12 1669.59 565.239   1
  -2  -3 -12 1361.13 502.501   2
  -2   3 -12 1499.29 354.479   2
   2  -3  12 1905.27 659.706   1
   2  -3  12 1964.69 535.077   5
  -2   3 -12 1444.90 245.298   4
   2   3  12 1484.57 589.392   4
  -2   3 -13 13985.7 1151.01   2
  -2  -3 -13 13596.6 1624.57   2
  -2   3 -13 13763.1 1680.92   1
   2  -3  13 12865.9 1677.46   1
   2  -3  13 13875.3 1506.37   5
  -2   3 -13 14021.7 822.822   4
   2   3  13 13692.3 1721.35   4
   2   3  13 13113.0 1664.10   3
   2   3  14 341.235 281.347   3
  -2   3 -14 396.373 227.140   2
   2  -3  14 600.469 465.299   1
  -2   3 -14 437.072 313.930   1
  -2  -3 -14 1209.15 546.561   2
   2  -3  14 563.237 394.847   5
  -2   3 -14 341.577 147.846   4
   2   3  14 203.161 295.375   4
  -2   3 -15 27931.1 1829.83   2
  -2  -3 -15 32373.2 2628.73   2
   2  -3  15 28821.1 2559.97   1
   2  -3  15 29900.0 2370.37   5
   2   3  15 30306.0 2623.18   4
  -2   3 -15 29336.2 1371.82   4
  -2   3 -16 184.442 200.220   2
   2  -3  16 780.865 519.494   1
  -2  -3 -16 188.143 237.636   2
   2  -3  16-43.6838 205.093   5
  -2   3 -16 227.582 165.764   4
   2   3  16-217.817 344.968   4
  -2  -3 -17 9677.07 1503.44   2
  -2   3 -17 8799.67 1123.79   2
   2  -3  17 9011.87 1485.29   1
   2  -3  17 8974.33 1383.71   5
   2   3  17 9318.02 1520.58   4
  -2   3 -17 9558.21 879.890   4
  -2   3 -18 2235.14 586.505   2
   2  -3  18 2878.57 908.527   1
   2  -3  18 3353.68 875.877   5
   2   3  18 2396.70 803.437   4
  -2   3 -18 3062.90 522.656   4
  -2   3 -19 1231.69 488.829   2
   2  -3  19 1233.90 605.656   1
   2  -3  19 1703.37 646.506   5
   2   3  19 895.621 500.062   4
  -2   3 -19 980.650 318.094   4
  -2   3 -20 1728.69 572.159   2
   2  -3  20 1532.85 699.708   1
   2  -3  20 1035.86 584.856   5
  -2   3 -20 1551.78 413.182   4
   2   3  20 1952.96 748.363   4
  -2   3 -21 12408.8 1543.07   2
   2  -3  21 11188.9 1745.44   1
   2  -3  21 11608.1 1752.06   5
   2   3  21 11838.6 1808.47   4
  -2   3 -21 10833.7 1128.42   4
  -2   3 -22 112.370 207.655   2
   2  -3  22-82.1982 277.869   1
   2  -3  22 436.892 397.661   5
   2   3  22-328.323 404.835   4
  -2   3 -22-82.9702 147.059   4
   2  -3  23 6418.13 1359.32   1
  -2   3 -23 6035.30 1164.57   2
   2  -3  23 6535.25 1379.55   5
   2   3  23 6243.80 1346.22   4
  -2   3 -23 6671.04 943.062   4
   2  -3  24 1546.81 723.020   1
  -2   3 -24 895.429 450.545   2
   2  -3  24 1287.71 662.869   5
   2   3  24 1312.44 659.927   4
  -2   3 -24 938.096 386.348   4
   2  -3  25 1799.70 749.899   1
  -2   3 -25 2045.03 700.812   2
   2  -3  25 2610.96 847.895   5
   2   3  25 3110.18 999.042   4
  -2   3 -25 2266.86 602.789   4
   2  -3  26-443.918 439.658   1
   2   3  26 171.585 107.829   1
   2  -3  26-193.013 317.122   5
   2   3  26-385.694 415.464   4
   2  -3  27 217.682 363.689   1
   2  -3  27-371.414 378.372   5
   2   3  27 709.416 480.211   4
   2  -3  28 390.644 423.902   1
   2  -3  28 468.005 536.344   5
   2   3  28-19.7667 270.945   4
   2  -3  29 293.532 363.830   1
   2  -3  29 584.924 472.825   5
   2   3  29 1007.83 598.294   4
   2  -3  30-1029.23 607.808   1
   2  -3  30 621.932 556.842   5
   2   3  30-276.575 376.294   4
   2  -3  31 3477.08 1092.19   1
   2  -3  31 3230.43 1172.57   5
   2   3  31 2031.26 878.805   4
   2  -3  32 150.079 302.554   1
   2   3  32-94.5430 299.397   4
   2  -3  33 423.333 426.098   1
   2  -3  33 1243.01 821.821   5
   2   3  33 1421.58 777.779   4
   2  -3  34-237.305 336.809   1
   2  -3  34-494.174 542.358   5
   2   3  34 66.2791 277.092   4
   2  -3  35 2028.37 802.465   1
   2  -3  35 734.028 618.411   5
   2  -3  36-432.111 471.101   1
   2  -3  36-531.111 528.150   5
  -2   4  36 1629.77 914.843   5
  -2   4  35 2846.31 1192.35   5
  -2   4  34 178.093 350.972   5
  -2  -4  34 5.28362 1205.26   5
  -2   4  33 1878.14 916.967   5
  -2  -4  33 323.019 540.028   5
  -2  -4  32-168.628 311.101   5
  -2   4  32-227.638 327.277   4
  -2  -4  31 1160.36 831.975   5
  -2   4  31 404.238 448.245   5
  -2   4  31-18.6880 269.154   4
  -2   4  30 691.985 534.977   5
  -2  -4  30 1991.91 1077.47   5
  -2   4  30 1220.72 729.108   4
  -2   4  29 409.721 421.810   5
  -2  -4  29 4.48613 193.845   5
  -2   4  29 308.969 391.060   4
  -2  -4  28 1173.54 789.442   5
  -2   4  28 1172.64 662.730   5
  -2   4  28 454.805 436.076   4
  -2   4  27 6372.42 1458.12   5
  -2  -4  27 6615.51 1836.52   5
  -2   4  27 7888.79 1584.82   4
  -2  -4  26-691.010 588.225   5
  -2   4  26-195.743 346.166   5
  -2   4  26 189.464 361.387   4
  -2   4  25 2466.98 936.635   5
  -2  -4  25 4703.81 1537.33   5
  -2   4  25 3307.86 1027.53   4
  -2  -4  24 711.223 563.810   5
  -2   4  24 1679.57 704.433   5
  -2   4  24 1908.46 766.869   4
  -2   4  23 579.444 430.838   5
  -2  -4  23-371.270 501.582   5
  -2   4  23 891.349 548.363   4
  -2  -4  22 220.126 377.538   5
  -2   4  22-586.815 447.857   4
  -2  -4  21 30.8200 447.463   5
  -2   4  21 138.116 288.160   4
  -2  -4  20 1412.25 770.141   5
  -2   4  20 1533.97 678.568   4
   2  -4 -19 5560.54 1167.96   2
  -2  -4  19 3578.19 1204.05   5
  -2   4  19 5523.62 1202.16   4
   2  -4 -18 88.4410 414.379   2
  -2  -4  18 726.249 544.902   5
  -2   4  18 1133.76 559.622   4
   2  -4 -17 7661.74 1266.18   2
   2   4 -17 6735.16 1371.67   5
  -2  -4  17 6993.53 1617.67   5
  -2   4  17 7075.58 1299.38   4
   2  -4 -16 719.254 354.397   2
   2   4 -16 868.929 501.950   5
  -2  -4  16-203.509 480.222   5
  -2   4  16 152.401 267.595   4
  -2  -4  16-434.427 353.506   3
   2  -4 -15 3002.23 733.029   2
  -2  -4  15 2338.15 899.104   5
   2   4 -15 2244.97 749.754   5
  -2  -4  15 2704.66 731.675   3
  -2   4  15 2171.13 686.677   4
   2  -4 -14 872.197 382.906   2
   2   4 -14 1012.29 453.934   5
  -2  -4  14 1802.11 766.779   5
  -2   4  14 656.793 437.566   4
  -2  -4  14 942.400 448.320   3
   2  -4 -13 12282.7 1397.40   2
  -2  -4  13 12718.4 1991.72   5
   2   4 -13 12965.0 1781.76   5
  -2   4  13 13267.8 1667.16   4
  -2  -4  13 12768.3 1535.34   3
   2   4 -12 872.543 377.451   2
  -2  -4  12 1231.72 491.275   3
   2  -4 -12 1327.84 461.292   2
  -2  -4  12 1700.19 778.589   5
   2   4 -12 1227.52 563.948   5
  -2   4  12 1167.96 566.063   4
  -2  -4  11 2270.55 647.717   3
   2   4 -11 2360.98 541.836   2
   2  -4 -11 2974.08 641.191   2
   2   4 -11 3084.72 891.909   5
  -2  -4  11 2499.61 861.259   5
  -2   4  11 4070.92 891.258   4
   2  -4 -10 3059.48 832.866   3
   2   4 -10 3048.75 608.648   2
  -2  -4  10 2857.63 719.636   3
   2  -4 -10 2408.99 551.763   2
  -2  -4  10 2972.37 903.315   5
   2   4 -10 3352.90 877.106   5
  -2   4  10 3302.64 760.262   4
   2  -4  -9-20.7859 438.825   3
   2   4  -9-6.91263 108.372   2
  -2  -4   9 275.214 272.639   3
   2  -4  -9 253.481 187.281   2
  -2   4   9-10.7210 134.961   1
   2   4  -9-21.3294 166.737   5
  -2  -4   9 252.125 336.842   5
  -2   4   9-189.277 243.510   4
   2  -4  -8-229.140 332.571   3
   2   4  -8-133.465 188.096   2
  -2  -4   8-114.756 233.149   3
  -2   4   8 94.2111 185.937   1
   2  -4  -8 95.1971 106.473   2
  -2  -4   8 132.646 334.986   5
   2   4  -8-402.786 315.486   5
  -2   4   8-177.299 231.112   4
   2   4  -7 2200.74 514.758   2
  -2  -4   7 1195.61 445.559   3
   2  -4  -7 1695.67 660.138   3
  -2   4   7 2409.65 583.425   1
   2  -4  -7 2021.24 432.922   2
   2   4  -7 3111.74 832.439   5
  -2  -4   7 1860.58 691.708   5
  -2   4   7 2108.55 465.940   5
   2  -4  -6 2918.54 822.026   3
   2   4  -6 2052.15 487.085   2
  -2  -4   6 1915.18 600.713   3
   2  -4  -6 2014.03 552.618   1
   2  -4  -6 2581.84 451.622   2
  -2   4   6 2654.86 648.492   1
   2   4  -6 2698.49 782.525   1
   2   4  -6 2453.60 781.661   5
  -2   4   6 1744.82 393.966   5
  -2  -4   6 1869.22 745.559   5
   2   4  -5 9310.88 1017.48   2
   2  -4  -5 10002.5 792.395   2
   2  -4  -5 10005.7 1257.04   1
  -2   4   5 9429.46 1204.09   1
   2   4  -5 11130.8 1641.22   1
  -2   4   5 10169.0 834.713   5
  -2  -4   5 10147.0 1568.39   5
   2   4  -5 10902.9 1588.61   5
  -2  -4   5 9091.35 1253.10   3
   2  -4  -5 11105.4 1580.80   3
  -2  -4   4 1362.27 510.999   3
   2   4  -4 1272.78 408.097   2
   2  -4  -4 1193.98 227.003   2
   2  -4  -4 985.464 498.789   3
   2   4  -4 1019.14 475.769   1
  -2   4   4 1098.48 458.099   1
   2  -4  -4 1518.05 516.692   1
   2   4  -4 956.918 467.017   5
  -2   4   4 1364.08 276.603   5
  -2  -4   4 2921.30 870.285   5
   2   4  -3 11478.3 1140.21   2
   2  -4  -3 10376.9 525.412   2
   2  -4  -3 9904.50 1302.02   1
  -2   4   3 11445.5 1389.64   1
   2   4  -3 11531.0 1617.89   1
   2   4  -3 8430.65 1400.94   5
  -2  -4   3 10619.6 1379.17   3
   2  -4  -3 9810.05 1508.53   3
   2   4  -2 22370.8 1596.41   2
  -2   4   2 21689.1 1932.90   1
   2   4  -2 22950.4 2260.41   1
   2  -4  -2 20744.9 1915.72   1
   2   4  -2 22151.6 2271.01   5
  -2   4   2 21656.2 1656.70   4
   2  -4  -2 18547.9 2039.83   3
  -2  -4   2 20053.9 1880.25   3
   2  -4  -1 13.1051 346.187   3
  -2  -4   1-13.9185 91.6650   2
  -2  -4   1 156.883 303.976   3
   2  -4  -1 44.5832 304.993   1
  -2   4   1 26.5857 147.172   1
   2   4  -1-76.6593 191.077   1
   2   4  -1-15.7312 189.371   2
   2   4  -1 5.92846 340.850   5
  -2   4   1-38.5431 216.348   4
   2   4   0 19011.8 1524.67   2
  -2  -4   0 19042.7 1475.20   2
   2  -4   0 20798.8 1967.05   1
  -2   4   0 21623.1 1980.02   1
   2   4   0 19765.0 2061.41   1
   2   4   0 17901.1 2076.72   5
  -2  -4   0 19487.3 1870.60   3
   2  -4   0 18556.7 2063.52   3
  -2   4   0 19355.6 1463.60   4
   2  -4   1 1584.01 613.737   3
  -2  -4  -1 1295.47 395.219   2
   2   4   1 1261.03 414.360   2
  -2   4  -1 1428.17 526.325   1
   2  -4   1 1466.89 557.049   1
   2   4   1 1483.30 556.707   1
   2   4   1 169.999 365.413   5
  -2   4  -1 1565.70 432.546   4
   2   4   1 1470.89 557.099   3
  -2  -4  -2 2558.31 563.622   2
   2  -4   2 2063.79 717.248   3
   2  -4   2 2707.48 766.796   1
   2   4   2 2617.91 592.589   2
  -2   4  -2 3617.99 837.052   1
   2   4   2 2601.07 721.820   1
   2   4   2 2344.75 720.255   5
   2   4   2 2220.41 683.569   3
  -2   4  -2 2398.89 499.479   4
  -2  -4  -3 10629.4 1153.79   2
   2   4   3 9568.71 1145.21   2
   2   4   3 11107.4 1498.50   1
  -2   4  -3 10618.3 1466.16   1
   2  -4   3 9767.43 1413.44   1
   2   4   3 9041.95 1532.52   5
  -2   4  -3 10564.2 975.390   4
   2  -4   3 9531.65 1484.15   3
   2   4   3 10178.8 1479.10   3
  -2  -4  -4 463.267 264.150   2
   2   4   4 383.979 243.603   3
  -2   4  -4 872.644 427.622   1
   2   4   4 1125.58 506.195   1
   2  -4   4 271.521 375.223   1
   2   4   4 401.527 355.359   5
  -2   4  -4 630.862 265.332   4
   2  -4   4 1373.92 578.353   3
  -2  -4  -5 4951.83 829.596   2
   2   4   5 5534.11 1115.62   3
   2   4   5 7016.16 1154.20   1
   2  -4   5 6269.14 1156.78   1
  -2   4  -5 5462.46 1074.04   1
   2   4   5 5272.22 1184.57   5
  -2   4  -5 6003.95 682.670   4
   2  -4   5 5201.12 1109.76   3
  -2  -4  -6 254.600 215.575   2
   2   4   6 71.6873 226.277   3
   2   4   6 298.094 257.151   1
   2  -4   6 689.569 459.382   1
  -2   4  -6 419.568 321.994   1
   2  -4   6 129.136 131.136   5
   2   4   6-279.323 351.719   5
  -2   4  -6-81.5378 122.749   4
  -2  -4  -7-122.595 174.203   2
   2   4   7 461.000 355.813   3
   2  -4   7-213.030 330.164   1
   2   4   7 483.749 320.579   1
   2  -4   7-59.1956 142.705   5
  -2   4  -7-42.0990 97.1853   4
   2   4   7-146.929 258.256   5
  -2  -4  -8-48.0741 173.156   2
   2  -4   8 206.666 301.412   1
   2   4   8-100.093 212.775   1
   2  -4   8 50.6982 125.203   5
   2   4   8 469.683 430.475   4
  -2   4  -8 115.883 119.118   4
   2   4   8-85.5692 224.891   5
  -2  -4  -9 605.349 323.215   2
   2  -4   9 460.709 449.293   1
   2   4   9 46.0276 189.083   2
   2   4   9 137.247 191.941   1
   2  -4   9 187.115 208.484   5
   2   4   9 301.828 396.458   4
   2   4   9 637.917 465.395   5
  -2  -4 -10 1274.12 495.260   2
   2   4  10 1559.90 536.738   1
   2  -4  10 1120.64 616.758   1
   2  -4  10 1336.45 514.725   5
   2   4  10 1436.30 670.968   4
  -2  -4 -11 21.7405 235.465   2
   2   4  11 284.656 184.041   1
   2  -4  11 291.564 426.221   1
   2  -4  11 95.1074 190.649   5
   2   4  11-292.488 347.926   4
  -2  -4 -12 6462.63 1153.37   2
  -2   4 -12 6615.29 511.468   2
   2  -4  12 5143.17 1180.01   1
   2   4  12 5183.54 913.428   1
   2  -4  12 6287.49 1061.19   5
   2   4  12 5856.81 1281.71   4
  -2   4 -12 6046.27 527.898   4
  -2   4 -13 7600.38 663.609   2
  -2  -4 -13 6104.31 1168.27   2
   2   4  13 7187.66 1069.28   1
   2  -4  13 7345.20 1410.95   1
   2  -4  13 7768.82 1220.45   5
  -2   4 -13 6629.25 561.988   4
   2   4  13 6501.93 1328.94   4
  -2  -4 -14 13996.6 1788.15   2
  -2   4 -14 15084.8 1049.86   2
   2   4  14 12194.7 1365.41   1
   2  -4  14 15439.1 2044.64   1
   2  -4  14 14418.4 1720.66   5
   2   4  14 13609.6 1904.38   4
  -2   4 -14 13803.9 841.867   4
  -2  -4 -15 8897.00 1438.75   2
  -2   4 -15 10767.8 974.694   2
   2   4  15 10180.1 1237.23   1
   2  -4  15 9391.22 1627.92   1
   2  -4  15 9990.30 1475.21   5
   2   4  15 9047.35 1599.17   4
  -2   4 -15 9837.58 736.695   4
   2  -4  16 307.541 520.246   1
   2   4  16-17.1040 99.7467   1
  -2   4 -16 388.295 220.772   2
   2  -4  16 143.307 224.170   5
  -2   4 -16-124.979 93.6228   4
   2   4  16 95.6543 269.033   4
  -2   4 -17 887.000 320.024   2
   2   4  17 1162.71 397.369   1
   2  -4  17 1487.34 678.661   1
   2  -4  17 1462.49 611.163   5
   2   4  17 1853.15 767.623   4
  -2   4 -17 1190.31 287.852   4
  -2   4 -18 1774.49 470.160   2
   2   4  18 1675.32 484.438   1
   2  -4  18 1490.35 666.321   1
   2  -4  18 1748.55 670.117   5
  -2   4 -18 1897.54 369.410   4
   2   4  18 1721.19 741.117   4
   2  -4  19-350.726 395.909   1
  -2   4 -19-223.775 186.285   2
   2   4  19 424.014 251.618   1
   2  -4  19-168.022 274.519   5
   2   4  19-499.951 460.762   4
  -2   4 -19 24.0963 94.8281   4
  -2   4 -20 1884.07 542.938   2
   2  -4  20 1699.50 742.911   1
   2   4  20 1756.29 484.321   1
   2  -4  20 1777.55 760.077   5
   2   4  20 1632.90 752.546   4
  -2   4 -20 1649.81 378.829   4
  -2   4 -21 1703.41 544.170   2
   2  -4  21 1445.58 651.720   1
   2  -4  21 1420.69 647.763   5
   2   4  21 1427.56 715.051   4
   2  -4  22-50.1188 340.735   1
   2  -4  22-548.509 469.500   5
   2   4  22-89.3884 248.260   4
   2  -4  23 615.156 516.439   1
   2  -4  23 2227.38 879.212   5
   2   4  23 817.408 552.454   4
   2  -4  24-206.810 364.911   1
   2  -4  24 143.021 285.165   5
   2   4  24-280.039 410.482   4
   2  -4  25 2401.58 934.055   1
   2  -4  25 2754.69 1034.90   5
   2   4  25 1885.76 838.770   4
   2  -4  26 457.091 553.364   1
   2  -4  26-258.407 375.460   5
   2   4  26-68.0022 282.362   4
   2  -4  27 223.992 366.187   1
   2  -4  27 517.147 501.754   5
   2   4  27 1050.35 682.291   4
   2  -4  28-753.260 604.921   1
   2  -4  28-1007.54 673.836   5
   2   4  28 1107.17 690.071   4
   2  -4  29-843.712 635.747   1
   2  -4  29 25.4778 216.325   5
   2   4  29-488.910 518.582   4
   2  -4  30 1130.80 688.112   1
   2  -4  30 102.512 357.580   5
   2   4  30 303.964 395.178   4
   2  -4  31 244.308 447.262   1
   2  -4  31-933.964 659.164   5
   2  -4  32 1530.87 786.994   1
   2  -4  32 651.302 655.974   5
   2  -4  33 1736.79 877.182   1
   2  -4  33 2192.27 1066.75   5
   2  -4  34 1762.57 679.701   5
   2  -4  35 582.029 600.144   5
  -2  -5  32 318.693 596.790   5
  -2   5  31-654.165 518.466   5
  -2  -5  31 1516.43 963.975   5
  -2   5  30-490.028 451.326   5
  -2  -5  30-432.291 581.645   5
  -2  -5  29 2048.03 1056.16   5
  -2   5  29 792.829 550.125   5
  -2   5  28 18.7395 87.3146   5
  -2  -5  28 478.675 612.379   5
  -2   5  28 1227.60 720.392   4
  -2  -5  27-287.671 492.452   5
  -2   5  27-669.785 488.680   5
  -2   5  27 325.612 403.885   4
  -2  -5  26-598.250 599.759   5
  -2   5  26 1213.15 632.636   5
  -2   5  26 836.906 592.368   4
  -2  -5  26 325.548 335.869   3
  -2   5  25 512.036 412.619   5
  -2  -5  25-361.583 472.607   5
  -2   5  25 659.302 526.794   4
  -2  -5  25 470.294 375.015   3
   2   5 -24 246.358 275.189   2
  -2   5  24 123.194 193.468   5
  -2  -5  24-316.488 522.344   5
  -2   5  24 739.090 558.170   4
  -2  -5  24-136.344 262.669   3
   2   5 -23 1828.75 658.446   2
  -2   5  23 2358.04 811.090   5
  -2  -5  23 3177.75 1250.80   5
  -2  -5  23 2831.57 868.665   3
  -2   5  23 2133.53 823.976   4
   2   5 -22-159.043 228.571   2
  -2   5  22-60.1080 142.693   5
  -2  -5  22-734.874 666.553   5
  -2  -5  22 365.385 344.443   3
  -2   5  22 166.988 474.736   4
   2   5 -21 2626.19 702.787   2
  -2   5  21 2914.61 855.396   5
  -2  -5  21 3926.88 1333.30   5
  -2   5  21 3417.79 1036.90   4
  -2  -5  21 2640.36 847.426   3
   2   5 -20 3219.93 783.346   2
  -2  -5  20 4336.38 1440.62   5
  -2   5  20 3124.06 992.808   4
  -2  -5  20 2235.05 776.243   3
   2   5 -19-146.521 225.176   2
  -2  -5  19 98.8088 233.485   3
  -2   5  19 395.805 436.151   4
   2   5 -18 1136.19 442.498   2
  -2  -5  18 745.056 486.851   3
  -2  -5  18 2711.89 1059.93   5
  -2   5  18 2100.51 818.495   4
  -2  -5  17 3297.90 933.228   3
  -2  -5  17 2071.51 918.229   5
  -2   5  17 2950.41 915.988   4
  -2  -5  16-234.696 293.497   3
  -2  -5  16 73.8431 245.252   5
  -2   5  16 265.697 334.678   4
  -2  -5  15 7052.42 1307.82   3
  -2  -5  15 7688.85 1702.92   5
  -2   5  15 6951.77 1339.77   4
  -2  -5  14 3619.57 921.191   3
   2  -5 -14 4174.33 861.985   2
  -2  -5  14 4241.72 1244.29   5
   2   5 -14 3842.10 1009.89   5
  -2   5  14 3690.91 975.398   4
  -2  -5  13 1194.71 542.208   3
   2  -5 -13 1487.97 494.897   2
   2   5 -13 1249.89 578.118   5
  -2  -5  13 1006.34 731.540   5
  -2   5  13 1240.66 566.430   4
  -2  -5  12 4125.30 992.673   3
   2   5 -12 3781.69 735.402   2
   2  -5 -12 4717.85 842.783   2
   2   5 -12 2828.21 857.302   5
  -2  -5  12 4976.87 1374.51   5
  -2   5  12 4887.39 1076.51   4
  -2   5  12 4607.77 934.546   5
   2   5 -11 1906.31 523.641   2
  -2  -5  11 1589.50 625.591   3
   2  -5 -11 1552.87 461.130   2
   2   5 -11 1676.72 658.406   5
  -2  -5  11 2733.03 1003.42   5
  -2   5  11 1948.07 591.187   5
  -2   5  11 1586.40 626.319   4
   2   5 -10 639.874 298.484   2
  -2  -5  10-138.336 294.800   3
   2  -5 -10 792.363 310.796   2
  -2   5  10 944.557 378.156   5
   2   5 -10 687.351 451.147   5
  -2  -5  10 782.772 513.902   5
  -2   5  10 474.351 356.078   4
   2  -5  -9 271.686 393.240   3
  -2  -5   9 43.2606 219.435   3
   2   5  -9-289.931 238.877   2
   2  -5  -9 323.457 194.240   2
  -2   5   9 26.7208 208.971   1
   2   5  -9 724.861 455.208   5
  -2   5   9 157.629 173.045   5
  -2  -5   9 412.835 410.495   5
  -2   5   9 162.461 255.180   4
   2  -5  -8-22.4612 75.1227   2
   2  -5  -8-501.760 449.644   3
   2   5  -8-345.120 255.060   2
  -2  -5   8 115.609 266.473   3
  -2   5   8 110.676 191.252   1
   2   5  -8 67.2270 243.888   5
  -2   5   8-324.622 205.644   5
  -2  -5   8 152.687 291.269   5
  -2   5   8-219.572 292.058   4
   2   5  -7 5147.68 799.982   2
   2  -5  -7 5115.96 625.564   2
   2  -5  -7 4777.98 1170.39   3
  -2  -5   7 5381.28 1116.08   3
  -2   5   7 4435.03 919.835   1
  -2   5   7 4852.88 671.080   5
   2   5  -7 3375.19 907.645   5
  -2   5   7 5344.97 1034.45   4
  -2  -5   7 4324.92 1107.72   5
   2  -5  -6 451.780 343.767   3
  -2  -5   6 38.7704 229.061   3
   2  -5  -6 71.4935 87.8700   2
  -2   5   6 362.093 305.488   1
   2   5  -6-339.426 239.561   2
  -2   5   6 107.772 113.948   5
   2   5  -6 47.3685 184.372   5
  -2   5   6 547.322 376.248   4
   2   5  -5 13326.2 1256.82   2
   2  -5  -5 13346.5 664.089   2
  -2   5   5 13799.5 1669.72   1
   2   5  -5 13280.6 1847.24   5
  -2   5   5 11009.6 685.906   5
   2  -5  -5 14335.4 2010.85   3
  -2  -5   5 12689.5 1696.56   3
  -2   5   5 12856.8 1527.64   4
  -2  -5   4-727.998 453.004   3
   2  -5  -4-467.028 417.572   3
  -2   5   4 252.159 232.532   1
   2   5  -4-49.8063 205.726   2
   2   5  -4 163.396 241.459   5
  -2   5   4-112.288 238.950   4
  -2  -5   3 2572.85 790.805   3
   2  -5  -3 2021.06 816.283   3
   2   5  -3 2880.49 609.953   2
   2   5  -3 1676.73 690.921   5
  -2   5   3 2069.45 610.516   4
   2  -5  -2-148.574 460.312   3
  -2  -5   2 277.062 255.761   3
   2   5  -2-6.77197 348.054   5
   2   5  -2-147.360 173.499   2
  -2  -5   1 2097.66 728.738   3
   2  -5  -1 1076.68 582.799   3
   2   5  -1 1098.13 562.031   5
   2   5  -1 2712.07 604.900   2
   2  -5   0 10101.7 1712.04   3
   2   5   0 9143.27 1101.17   2
   2   5   0 7124.96 1393.69   5
   2  -5   1 77.0679 307.571   3
  -2  -5  -1 104.884 126.657   2
   2   5   1-43.9646 186.019   2
   2  -5   1 667.093 419.936   1
   2   5   1 149.959 245.329   5
  -2  -5  -2 11229.7 1255.51   2
   2  -5   2 12921.9 1788.91   1
   2   5   2 13342.2 1942.36   5
  -2   5  -2 12819.2 1294.63   4
   2  -5   2 11385.1 1791.31   3
   2  -5   3 2548.93 865.182   3
  -2  -5  -3 2238.12 571.351   2
   2  -5   3 2942.51 875.545   1
   2   5   3 1734.03 730.823   5
  -2   5  -3 3477.80 674.677   4
  -2  -5  -4 2948.10 671.732   2
   2  -5   4 3044.45 947.707   3
   2  -5   4 2932.52 878.170   1
   2   5   4 2725.30 875.376   5
  -2   5  -4 2528.49 555.002   4
  -2  -5  -5 1476.10 476.059   2
   2  -5   5 1633.90 734.794   3
   2  -5   5 2446.44 812.535   1
   2   5   5 1353.00 672.856   5
  -2   5  -5 1416.59 412.569   4
   2   5   5 1857.67 745.521   4
   2  -5   6 39.9839 330.581   3
  -2  -5  -6 624.658 321.677   2
   2  -5   6 1416.22 656.806   1
   2   5   6-101.422 298.157   5
   2   5   6 787.849 512.421   4
  -2   5  -6 565.526 290.551   4
  -2  -5  -7 10530.1 1349.06   2
   2  -5   7 10682.3 1746.70   1
   2   5   7 11656.7 1677.46   1
   2   5   7 11169.0 1933.13   5
  -2   5  -7 11087.3 1040.79   4
   2  -5   7 10558.4 1767.55   3
   2   5   7 11853.8 1823.71   4
  -2  -5  -8 9905.56 1340.62   2
   2  -5   8 12628.4 1901.12   1
   2   5   8 9307.67 1477.12   1
   2   5   8 11952.3 2003.14   5
   2   5   8 10036.7 1722.68   4
   2  -5   8 12824.1 1989.31   3
  -2   5  -8 10841.2 979.345   4
  -2  -5  -9-406.416 303.268   2
   2  -5   9 367.631 524.497   1
   2   5   9 605.691 387.807   1
   2   5   9 800.986 540.474   5
   2  -5   9 608.500 275.435   5
   2  -5   9 257.426 420.317   3
   2   5   9-256.485 354.293   4
  -2   5  -9-20.6190 138.461   4
  -2  -5 -10-254.653 233.303   2
   2  -5  10-542.445 452.231   1
   2   5  10 103.871 178.108   1
   2  -5  10-9.39285 79.1479   5
   2  -5  10-46.8346 279.161   3
   2   5  10 20.2427 259.146   4
  -2   5 -10-151.200 157.585   4
  -2  -5 -11 165.750 214.113   2
   2  -5  11 461.706 430.690   1
   2   5  11-199.250 218.854   1
   2  -5  11 245.527 231.949   5
   2   5  11-301.962 351.464   5
  -2   5 -11 6.15612 80.7756   4
   2   5  11-105.426 436.019   4
   2  -5  11 427.616 422.629   3
  -2  -5 -12 2682.75 784.745   2
   2  -5  12 2148.72 775.685   1
   2   5  12 1862.54 663.682   1
   2  -5  12 2033.62 631.729   5
  -2   5 -12 2364.31 408.782   4
   2   5  12 1144.95 608.447   4
   2   5  13 317.974 270.784   1
   2  -5  13 314.199 290.689   5
   2   5  13 515.031 503.347   4
  -2   5 -13 24.4523 76.0470   4
   2  -5  14-479.045 474.072   1
   2   5  14 429.190 312.701   1
   2  -5  14-729.547 414.064   5
  -2   5 -14 368.806 155.775   4
   2   5  14 307.987 349.233   4
   2  -5  15 1887.40 818.680   1
   2   5  15 1748.59 580.261   1
   2  -5  15 1100.97 514.064   5
   2   5  15 1872.88 904.940   4
   2  -5  16 468.369 396.138   1
   2  -5  16-247.117 296.549   5
   2   5  16-213.414 364.625   4
   2  -5  17 458.454 494.790   1
   2  -5  17 1278.01 615.723   5
   2   5  17 1032.11 622.296   4
   2  -5  18 2143.32 845.444   1
   2  -5  18 1438.09 649.186   5
   2   5  18 1448.68 769.873   4
   2  -5  19 101.153 388.707   1
   2  -5  19-244.752 273.480   5
   2   5  19 898.188 559.504   4
   2  -5  20 59.3210 304.322   1
   2  -5  20 483.787 459.763   5
   2   5  20 438.711 399.399   4
   2  -5  21-111.516 523.743   1
   2  -5  21 242.585 366.886   5
   2   5  21 655.563 504.406   4
   2  -5  22 648.782 517.051   1
   2  -5  22-169.914 265.534   5
   2   5  22 601.032 511.614   4
   2  -5  23 1369.71 747.300   1
   2  -5  23 12.3096 172.296   5
   2   5  23 1100.75 684.427   4
   2  -5  24 1228.81 761.104   1
   2   5  24-838.167 618.669   4
   2  -5  25 356.746 435.170   1
   2   5  25 1041.44 675.228   4
   2  -5  26-674.148 558.968   1
   2   5  26 280.514 405.469   4
  -2   6  24 115.873 282.835   4
  -2   6  23 520.022 484.079   4
  -2  -6  22 340.291 355.137   3
  -2   6  22-128.107 298.405   4
  -2  -6  21 1956.31 792.920   3
  -2   6  21 1474.29 760.350   4
  -2  -6  20 357.658 372.455   3
  -2  -6  20 184.262 507.537   5
  -2   6  20-442.392 482.776   4
  -2  -6  19 289.817 381.009   3
  -2  -6  19 1941.52 942.113   5
  -2   6  19 1356.25 682.403   4
  -2  -6  18 599.030 482.775   3
  -2  -6  18 474.340 474.880   5
  -2   6  18 2.80741 88.6668   4
  -2  -6  17 1984.39 788.363   3
  -2  -6  17 1249.56 758.294   5
  -2   6  17 2674.46 918.485   4
  -2  -6  16 110.096 289.004   3
  -2  -6  16-453.993 550.515   5
  -2   6  16-263.858 328.921   4
  -2  -6  15 683.092 444.099   3
  -2  -6  15-295.725 407.379   5
  -2   6  15-48.7021 294.260   4
  -2  -6  14-244.694 301.819   3
  -2  -6  14-222.956 318.567   5
  -2   6  14-360.993 385.026   4
  -2  -6  13 2372.60 838.445   3
  -2  -6  13 2008.61 800.451   5
  -2   6  13 2364.64 828.820   4
  -2  -6  12 662.066 459.731   3
  -2  -6  12 856.538 543.359   5
  -2   6  12 211.202 294.046   4
  -2  -6  11 3656.47 1027.01   3
  -2   6  11 5087.53 1178.73   4
  -2  -6  10-76.1706 293.827   3
  -2   6  10-301.968 374.218   4
  -2  -6   9 339.276 396.272   3
  -2   6   9 497.327 420.165   4
  -2  -6   8 1855.96 813.976   3
   2  -6  -8 1664.34 783.161   3
  -2   6   8 1549.39 610.663   4
  -2  -6   7-497.993 445.102   3
   2  -6  -7 331.800 388.620   3
  -2   6   7-288.428 317.248   4
   2  -6  -6-147.765 334.417   3
  -2  -6   6 493.570 416.026   3
  -2   6   6-294.009 312.465   4
  -2  -6   5 3645.06 1023.50   3
   2  -6  -5 3305.56 1132.35   3
  -2   6   5 3235.48 855.400   4
   2  -6  -4 461.634 498.544   3
  -2  -6   4 1686.33 706.814   3
  -2   6   4 1771.85 667.323   4
  -2  -6   3 1019.50 612.711   3
   2  -6  -3 904.562 608.002   3
  -2   6   3 1000.51 453.843   4
   2  -6  -2 391.234 498.293   3
  -2   6   2 159.040 248.727   4
   2  -6  -1 5766.38 1389.85   3
  -2   6   1 6427.28 1082.96   4
   2  -6   0 348.326 592.968   3
  -2   6   0 798.148 399.789   4
   2  -6   1 846.388 617.230   3
  -2   6  -1-135.541 243.636   4
   2  -6   2-854.006 640.924   3
   2   6   2 18.6648 338.843   4
  -2   6  -2-170.121 359.227   4
   2  -6   3 1974.87 887.025   3
   2   6   3 2879.47 971.184   4
   2  -6   4 292.091 408.459   3
   2   6   4 123.844 317.681   4
   2  -6   5 2058.46 924.302   3
   2   6   5 3115.73 996.100   4
   2  -6   6-18.4085 319.945   3
   2   6   6 14.1968 361.107   4
   2  -6   7 1241.30 749.913   3
   2   6   7 2771.44 981.983   4
   2  -6   8-209.486 385.987   3
   2   6   8 723.623 560.498   4
   2  -6   9 1552.06 822.930   3
   2   6   9 381.188 447.422   4
   2  -6  10 2236.71 927.944   3
   2   6  10 468.370 426.183   4
   2  -6  11 426.491 506.397   3
   2   6  11 2056.33 867.098   4
   2   6  12-560.021 502.893   4
   2  -6  12 147.166 382.122   3
   2   6  13 215.363 396.603   4
   2  -6  13 158.836 338.401   3
   2  -6  14-461.848 512.186   3
   2   6  14 655.416 551.005   4
   2   6  15 625.374 565.746   4
   2  -6  15 856.486 609.466   3
   2  -6  16 311.538 378.697   3
   2   6  16 622.180 561.966   4
   2  -6  17 717.096 579.059   3
   2   6  17-1157.70 678.924   4
   2  -6  18-234.787 447.523   3
   2   6  18-990.615 668.645   4
   2  -6  19-895.196 642.491   3
   2   6  19-416.232 505.728   4
   2   6  20 1946.19 933.838   4
   2  -6  20 2002.94 913.805   3
  -2   7  18-204.110 386.815   4
  -2  -7  17-1375.99 706.739   3
  -2   7  17 1311.85 710.045   4
  -2  -7  16 302.592 418.075   3
  -2   7  16 60.5452 206.821   4
  -2  -7  15 1072.93 623.234   3
  -2   7  15 1014.23 621.175   4
  -2  -7  14 53.8787 276.711   3
  -2   7  14 319.539 330.919   4
  -2  -7  13 330.782 401.407   3
  -2   7  13 763.734 552.939   4
  -2  -7  12 124.794 368.472   3
  -2   7  12 233.557 305.000   4
  -2  -7  11-626.925 525.580   3
  -2   7  11 252.746 333.647   4
  -2  -7  10 367.732 414.912   3
  -2   7  10 358.909 357.305   4
  -2  -7   9-70.1664 228.980   3
  -2   7   9-164.148 305.826   4
  -2  -7   8 1057.12 621.252   3
  -2  -7   7 127.626 307.372   3
   2  -7  -5-100.471 380.507   3
   2  -7  -4 97.5517 364.590   3
   2   7  -4-107.523 217.216   4
   2  -7  -3 942.825 642.815   3
   2   7  -3 476.790 532.371   4
   2  -7  -2 1122.37 765.145   3
   2   7  -2 593.613 520.551   4
   2  -7  -1-550.496 522.366   3
   2   7  -1-356.641 485.835   4
   2  -7   0-706.499 591.892   3
   2   7   0-446.973 460.150   4
   2  -7   1 1028.01 686.351   3
   2   7   1-378.513 457.222   4
   2  -7   2 28.8991 259.420   3
   2   7   2 113.136 312.127   4
   2  -7   3 265.520 488.611   3
   2   7   3 365.796 407.737   4
   2  -7   4 99.0783 342.536   3
   2   7   4 700.745 559.683   4
   2  -7   5 2211.05 1001.88   3
   2   7   5 2509.71 998.275   4
   2  -7   6 603.500 548.963   3
   2   7   6 623.655 554.028   4
   2  -7   7 930.856 673.681   3
   2   7   7 710.596 560.541   4
   2  -7   8 1037.49 859.432   3
   2   7   8 1273.67 756.672   4
   2  -7   9-152.628 390.537   3
   2   7   9 439.145 562.097   4
   2  -7  10 801.680 670.578   3
   2   7  10 1666.34 874.239   4
   2   7  11 1197.60 730.647   4
   2   7  12 672.758 647.454   4
   2   7  13 85.3006 231.928   4
  -3   0  38-4.84294 460.363   5
  -3   0  37 620.976 576.094   5
  -3   0  36 7452.99 1943.50   5
  -3   0  35 1336.64 864.298   5
  -3   0  34 10954.5 2211.12   5
  -3   0  33-89.7904 265.862   5
  -3   0  32-576.480 502.194   5
  -3   0  31 2629.00 1050.92   5
  -3   0  30 6482.09 1605.53   5
  -3   0  29 1523.53 970.315   5
   3   0 -28 29365.0 1786.89   1
  -3   0  28 31890.8 3418.30   5
   3   0 -27-41.1257 115.934   1
  -3   0  27 1351.93 896.704   5
   3   0 -26 14459.7 1233.80   1
  -3   0  26 15810.1 2304.45   5
   3   0 -25-22.3117 156.863   1
  -3   0  25-79.3375 267.600   5
   3   0 -24 317.074 183.390   1
  -3   0  24 509.119 398.270   5
   3   0 -23-74.1983 119.813   1
  -3   0  23 1142.81 603.441   5
   3   0 -22 41171.3 2038.78   1
  -3   0  22 40994.2 3404.81   5
   3   0 -22 42835.2 2970.74   4
   3   0 -21 5.98334 132.711   1
   3   0 -21-299.890 259.873   4
   3   0 -20 13038.2 1132.28   1
  -3   0  20 13361.4 1856.01   5
   3   0 -20 15477.9 1693.76   4
   3   0 -19-118.953 143.816   1
  -3   0  19 969.693 512.640   5
   3   0 -19 703.937 373.811   4
   3   0 -18 26396.2 1593.62   1
   3   0 -18 23247.0 1994.71   4
   3   0 -17 109.692 126.988   1
   3   0 -17-17.0005 157.610   4
   3   0 -16 58343.6 2211.75   1
   3   0 -16 62997.7 3021.30   4
   3   0 -15-112.400 171.267   5
   3   0 -15 17.1745 127.535   4
   3   0 -14 45589.0 2793.59   5
   3   0 -14 47884.2 2461.51   4
   3   0 -13 150.631 273.228   5
   3   0 -13-9.05214 108.795   4
   3   0 -12 27873.6 2090.79   5
   3   0 -12 28754.8 1792.34   4
  -3   0  12 30377.2 1318.54   3
  -3   0  11-70.0387 131.821   3
   3   0 -11 112.326 136.847   5
  -3   0  10 118594. 4300.52   5
   3   0 -10 117585. 4021.44   5
  -3   0  10 115261. 2310.52   3
  -3   0   9-52.8678 112.601   3
  -3   0   9-36.4739 196.615   5
   3   0  -9 2.19951 211.033   5
  -3   0   8 58666.6 2899.79   5
   3   0  -8 55404.1 2646.86   5
  -3   0   8 58105.2 1450.61   3
  -3   0   7-23.8303 270.646   5
   3   0  -7-42.4743 145.613   5
   3   0  -6 18792.2 1485.93   5
  -3   0   6 18682.8 1565.47   5
   3   0  -6 19734.6 757.448   3
  -3   0   5-185.748 269.596   5
   3   0  -5-360.377 251.469   5
   3   0  -5-46.7688 62.5083   3
  -3   0   4 4636.28 747.186   5
   3   0  -4 4783.48 746.161   5
   3   0  -3 112.831 196.761   5
  -3   0   3 46.5646 212.541   5
   3   0  -2 22461.9 1573.86   5
  -3   0   2 21176.9 1527.63   5
   3   0  -1 9.09717 168.666   2
  -3   0   1-127.074 184.680   2
   3   0  -1-113.792 267.089   5
  -3   0   1-47.8718 206.187   5
  -3   0   0 93891.3 2645.70   2
   3   0   0 93369.9 2634.21   2
   3   0   0 90007.8 3119.82   5
  -3   0   0 98100.9 3157.75   5
   3   0   1-35.5513 167.619   2
  -3   0  -1-89.2503 180.332   2
   3   0   1-69.8517 213.035   5
  -3   0  -2 26276.9 1428.28   2
   3   0   2 25830.7 1417.62   2
  -3   0  -3 25.0483 116.658   2
   3   0   3 88.3498 186.434   2
   3   0   4 33478.4 1690.78   2
  -3   0  -4 31810.7 1649.41   2
   3   0   5 102.547 159.766   2
  -3   0  -5 161.092 211.767   2
  -3   0  -6 4241.82 663.222   2
   3   0   6 4460.69 667.914   2
   3   0   7-82.7044 292.329   2
  -3   0  -7-44.2378 206.489   2
  -3   0  -8 137122. 3915.91   2
   3   0   8 138808. 3940.80   2
   3   0   9-90.1335 259.567   2
  -3   0  -9 159.151 208.520   2
   3   0   9 175.430 213.475   4
   3   0  10 123098. 3922.27   2
  -3   0 -10 115986. 3847.28   2
   3   0  10 114761. 3361.19   4
  -3   0 -11-111.557 209.860   2
   3   0  11-54.8613 226.988   4
  -3   0 -12 21564.2 1778.56   2
   3   0  12 22025.6 1570.94   4
  -3   0 -13-78.7634 199.113   2
   3   0  13 91.4653 193.272   4
  -3   0 -14 12604.2 1436.87   2
   3   0  14 10687.0 1149.47   4
  -3   0 -15 87.5745 193.765   2
   3   0  15-213.470 227.865   4
  -3   0 -16 36981.6 2599.48   2
   3   0  16 38045.9 2248.21   4
  -3   0 -17-9.77971 247.112   2
   3   0  17 123.663 248.172   4
  -3   0 -18 8732.79 1343.06   2
   3   0  18 10240.0 1243.80   4
  -3   0 -19-145.013 243.492   2
   3   0  19 53.0826 389.963   4
  -3   0 -20 3005.81 840.591   2
   3   0  20 3293.49 754.313   4
  -3   0 -21-712.318 437.997   2
   3   0  21-243.562 253.649   4
   3   0  22 763.553 405.400   1
   3   0  22 770.692 396.423   4
   3   0  23-50.9250 181.208   1
   3   0  23-66.1351 206.601   4
   3   0  24 6921.50 1093.41   1
   3   0  24 6957.06 1150.56   4
   3   0  25 478.709 317.323   1
   3   0  25 585.641 387.361   4
   3   0  26 5198.97 962.260   1
   3   0  26 5124.62 1043.86   4
   3   0  27 57.0523 171.757   1
   3   0  27 359.183 374.183   4
   3   0  28 1039.45 457.136   1
   3   0  28 1224.48 539.625   4
   3   0  29 16.8999 318.521   1
   3   0  29 793.949 452.452   4
   3   0  30 14095.6 1697.78   1
   3   0  30 15673.1 1922.89   4
   3   0  31 306.462 280.061   1
   3   0  31 204.809 312.452   4
   3   0  32 5210.69 1066.53   1
   3   0  32 6205.56 1252.44   4
   3   0  33 337.457 280.667   1
   3   0  33-77.7405 229.361   4
   3   0  34 6467.41 1227.94   1
   3   0  34 6259.12 1289.66   4
   3   0  35 315.770 340.771   4
   3   0  36 2048.14 768.821   4
  -3   1  38-23.6116 249.527   5
  -3   1  37 54.2909 345.316   5
  -3  -1  37-440.362 591.297   5
  -3   1  36 1180.99 802.169   5
  -3  -1  36 533.100 637.261   5
  -3   1  35-494.162 540.756   5
  -3  -1  35-320.949 443.665   5
  -3   1  34 1320.60 775.334   5
  -3  -1  34 2472.29 1132.91   5
  -3   1  33 733.766 575.863   5
  -3  -1  33 1218.64 768.958   5
  -3   1  32 3845.78 1240.36   5
  -3  -1  32 3126.96 1221.54   5
  -3  -1  31-540.737 568.014   5
  -3   1  31 701.001 574.594   5
  -3   1  30 1143.29 678.638   5
  -3  -1  30 1248.52 760.454   5
   3   1 -30 622.349 338.822   1
  -3   1  29 202.175 325.361   5
  -3  -1  29 421.378 487.114   5
   3   1 -29-736.744 361.845   1
  -3   1  28 1105.91 673.304   5
  -3  -1  28 1275.99 730.922   5
   3   1 -28 1555.49 526.747   1
  -3  -1  27 3395.05 1123.22   5
  -3   1  27 3149.67 1141.28   5
   3   1 -27 4191.01 856.380   1
  -3   1  26 5274.45 1292.91   5
  -3  -1  26 5341.61 1371.94   5
   3   1 -26 5034.22 939.840   1
  -3   1  25 2359.67 670.302   3
  -3   1  25 2796.95 941.174   5
  -3  -1  25 2235.43 910.776   5
   3   1 -25 2670.79 664.841   1
  -3   1  24 686.947 342.397   3
  -3  -1  24 874.069 647.196   5
  -3   1  24 792.754 626.227   5
   3   1 -24 346.689 240.085   1
  -3   1  23 67.3105 235.676   3
   3   1 -23 46.1465 158.486   1
  -3   1  23 216.031 261.402   5
  -3  -1  23 817.854 441.325   5
  -3   1  22 170.181 197.819   3
   3   1 -22 537.830 306.798   1
  -3   1  22 423.705 394.517   5
  -3  -1  22-169.163 313.840   5
   3   1 -22 320.361 261.309   4
  -3   1  21 247.886 212.446   3
   3   1 -21 488.175 326.590   1
   3  -1 -21 105.487 58.7710   1
  -3   1  21-179.783 276.469   5
  -3  -1  21-12.4470 251.480   5
   3   1 -21 383.514 322.232   4
  -3   1  20 768.080 330.857   3
   3   1 -20 542.186 299.337   1
   3  -1 -20 627.023 141.823   1
  -3   1  20 1686.74 648.726   5
  -3  -1  20 755.184 548.321   5
   3   1 -20 497.905 307.288   4
   3  -1 -20 588.495 324.159   4
   3  -1 -19 6362.26 452.124   1
   3   1 -19 6403.82 962.704   1
  -3   1  19 7306.34 1288.08   5
   3  -1 -19 6902.17 1174.28   4
   3   1 -19 6699.50 1056.26   4
  -3   1  19 7167.33 1014.24   3
   3  -1 -18 16053.9 755.533   1
   3   1 -18 16071.9 1523.17   1
   3   1 -18 18506.5 2067.19   5
  -3   1  18 14938.5 1801.10   5
   3  -1 -18 19338.9 1887.71   4
  -3   1  18 16830.5 1502.88   3
   3   1 -18 17031.7 1636.36   4
  -3   1  17 3114.93 646.983   3
   3   1 -17 4006.83 742.535   1
   3  -1 -17 2977.76 338.926   1
   3   1 -17 3478.91 886.470   5
   3  -1 -17 3477.27 785.053   4
   3   1 -17 4056.42 780.912   4
   3   1 -16 29234.1 1951.34   1
   3  -1 -16 27525.3 1019.60   1
   3   1 -16 31632.0 2584.87   5
  -3   1  16 27843.4 1852.97   3
   3  -1 -16 29033.0 2189.49   4
   3   1 -15 3938.31 713.631   1
   3   1 -15 4513.54 953.130   5
  -3   1  15 4883.09 761.403   3
   3  -1 -15 5000.63 887.788   4
   3   1 -14 33738.2 2004.90   1
   3   1 -14 34773.3 2599.11   5
   3  -1 -14 34341.8 2229.27   4
  -3   1  14 33201.3 1921.72   3
   3   1 -13 8669.40 1275.42   5
  -3   1  13 7583.70 1132.49   5
   3  -1 -13 8975.43 1105.43   4
  -3   1  13 7717.52 907.645   3
  -3   1  12 82143.6 3491.70   5
   3   1 -12 80827.3 3811.41   5
   3  -1 -12 83931.0 3240.70   4
  -3   1  12 79598.8 2863.69   3
   3   1 -11 14223.2 1578.19   5
  -3   1  11 16294.8 1511.93   5
   3  -1 -11 16512.6 1386.62   4
  -3   1  11 14876.6 1204.79   3
  -3   1  10 132403. 4156.15   5
   3   1 -10 132460. 4717.41   5
   3  -1 -10 131777. 3775.79   4
  -3   1  10 126638. 3463.93   3
  -3   1   9 6032.19 878.058   5
   3  -1  -9 5361.89 765.841   5
   3   1  -9 5672.00 973.001   5
   3  -1  -9 5993.14 787.438   4
   3  -1  -9 5812.76 694.852   3
  -3   1   9 5938.33 734.564   3
   3  -1  -8 135.666 158.266   3
   3  -1  -8 38.9093 139.757   5
  -3   1   8 164.261 171.371   5
   3   1  -8 66.8528 220.071   5
  -3   1   8 55.6894 126.396   3
   3  -1  -8 62.4221 128.553   4
   3  -1  -7 1839.60 399.953   3
  -3   1   7 1956.11 513.275   5
   3   1  -7 2247.12 619.629   5
   3  -1  -7 1772.30 403.674   5
   3  -1  -7 2681.93 477.401   4
   3  -1  -6 12816.8 1030.57   5
  -3   1   6 12044.6 1109.94   5
   3   1  -6 13796.6 1463.40   5
   3  -1  -6 12895.0 992.940   4
   3  -1  -6 13363.6 1030.93   3
   3   1  -5 5674.91 756.814   2
   3  -1  -5 5794.10 667.415   5
  -3   1   5 5728.81 727.679   5
   3   1  -5 5441.55 929.874   5
   3  -1  -5 5536.81 674.956   3
   3  -1  -5 6591.41 667.557   4
   3   1  -4 1650.68 394.651   2
   3   1  -4 2212.56 585.552   5
  -3   1   4 1823.44 420.198   5
   3  -1  -4 1888.78 375.147   5
   3  -1  -4 3420.59 464.489   4
   3  -1  -4 2845.99 478.664   3
   3   1  -4 2328.10 240.355   3
   3   1  -3 37718.9 1843.63   2
  -3   1   3 36627.7 1685.26   5
   3  -1  -3 37673.9 1629.41   5
   3   1  -3 37627.4 2361.66   5
   3  -1  -3 38008.8 1421.84   4
   3   1  -2 881.625 273.169   2
   3  -1  -2 1058.33 262.284   2
  -3  -1   2 1266.60 327.558   2
   3  -1  -2 1338.96 324.362   5
   3   1  -2 1447.58 509.648   5
  -3   1   2 1240.57 328.011   5
  -3  -1   1 80396.9 2673.50   2
   3   1  -1 80813.9 2678.83   2
   3  -1  -1 78952.5 2187.39   2
   3  -1  -1 77647.6 2324.42   5
   3   1  -1 77160.5 3349.72   5
  -3   1   1 81489.9 2279.47   5
   3  -1   0 21333.2 1115.61   2
  -3  -1   0 22113.8 1408.89   2
   3  -1   0 21641.1 1230.63   5
   3   1   0 20295.7 1701.64   5
   3  -1   1 75866.4 2096.43   2
  -3   1  -1 76542.3 2132.05   2
  -3  -1  -1 71535.5 2552.42   2
   3   1   1 73299.5 3208.64   5
   3  -1   1 77339.3 2301.26   5
  -3   1  -2 25807.1 1249.81   2
   3  -1   2 26121.7 1254.73   2
  -3  -1  -2 25128.7 1535.49   2
   3   1   2 24527.5 1836.63   5
  -3  -1  -3 62655.7 2468.86   2
   3  -1   3 60928.2 1976.73   2
  -3   1  -3 62905.0 2001.58   2
  -3   1  -4 16244.5 1052.44   2
  -3  -1  -4 16281.7 1294.66   2
   3  -1   4 16341.8 1043.54   2
   3  -1   5 55345.4 2017.29   2
  -3  -1  -5 56301.1 2489.90   2
  -3   1  -5 54763.1 2007.28   2
   3  -1   6 2730.44 493.449   2
  -3   1  -6 3052.47 505.160   2
  -3  -1  -6 2793.87 586.532   2
   3  -1   6 2296.27 294.727   4
   3  -1   7 1332.18 375.090   2
  -3   1  -7 1738.94 396.223   2
  -3  -1  -7 1171.73 375.216   2
   3  -1   7 1835.47 281.103   4
   3  -1   8 1138.45 368.454   2
  -3   1  -8 1201.43 373.535   2
  -3  -1  -8 1008.80 382.763   2
   3  -1   8 1381.65 248.444   4
   3  -1   9 39237.4 2029.09   2
  -3   1  -9 41406.1 2053.81   2
  -3  -1  -9 44149.2 2467.13   2
   3  -1   9 43555.0 1488.69   4
   3  -1  10 47924.0 2261.73   2
  -3   1 -10 47892.4 2297.72   2
  -3  -1 -10 47080.6 2613.08   2
   3  -1  10 45859.0 1609.51   4
   3   1  10 46702.6 2494.79   4
  -3  -1 -11 261.302 162.723   2
  -3   1 -11 304.332 150.273   2
   3  -1  11 574.051 288.184   2
   3  -1  11 205.479 120.054   4
   3   1  11 356.945 208.172   4
  -3  -1 -12 1890.11 561.854   2
  -3   1 -12 1847.72 490.484   2
   3   1  12 1883.75 566.226   4
   3  -1  12 1887.40 370.203   4
  -3   1 -13 12005.5 1290.33   2
  -3  -1 -13 12261.1 1451.18   2
   3   1  13 10243.2 1262.72   4
   3  -1  13 13384.1 1005.90   4
  -3  -1 -14 41969.4 2758.01   2
  -3   1 -14 43394.5 2526.64   2
   3  -1  14 39392.7 1789.65   4
   3   1  14 41365.8 2559.43   4
  -3   1 -15 7961.08 1125.34   2
  -3  -1 -15 8180.56 1267.49   2
   3   1  15 7726.56 1149.77   4
   3  -1  15 8228.65 861.335   4
  -3  -1 -16 13926.5 1678.41   2
  -3   1 -16 13192.0 1481.62   2
   3  -1  16 11906.7 1059.15   4
   3   1  16 12192.9 1460.66   4
   3  -1  17 7049.13 1094.94   1
  -3  -1 -17 7079.96 1221.77   2
  -3   1 -17 7532.11 1154.44   2
   3  -1  17 7443.67 885.280   4
   3   1  17 7332.05 1172.59   4
  -3   1 -18 254.600 213.268   2
  -3  -1 -18 421.212 374.650   2
   3  -1  18 51.1670 192.290   1
   3  -1  18 424.179 299.258   4
   3   1  18 314.442 296.195   4
  -3  -1 -19 580.024 418.845   2
  -3   1 -19 86.6880 233.958   2
   3  -1  19 130.218 382.218   1
   3  -1  19 673.814 297.427   4
   3   1  19 216.334 303.798   4
   3  -1  20 28999.9 2305.13   1
  -3   1 -20 28710.5 2474.83   2
   3   1  20 28520.5 2387.18   4
   3  -1  20 29419.5 1888.81   4
  -3   1 -21 4636.04 1056.96   2
   3  -1  21 4732.16 954.082   1
   3  -1  21 5331.41 826.997   4
   3   1  21 5400.53 1080.46   4
   3  -1  22 8710.04 1308.50   1
  -3   1 -22 9255.19 1480.12   2
   3  -1  22 9887.32 1151.88   4
   3   1  22 10503.3 1513.24   4
   3  -1  23-262.175 284.271   1
   3  -1  23 254.017 220.948   4
   3   1  23 33.7787 256.286   4
   3  -1  24 758.725 472.877   1
   3  -1  24 802.683 362.624   4
   3   1  24 1286.01 563.144   4
   3  -1  25 57.0179 309.146   1
   3  -1  25 119.954 197.249   4
   3   1  25-505.990 402.599   4
   3  -1  26 6489.88 1211.78   1
   3   1  26 6070.13 1218.76   4
   3  -1  26 8346.03 1184.89   4
   3  -1  27 1830.39 726.179   1
   3  -1  27 2501.57 679.021   4
   3   1  27 1089.29 563.570   4
   3  -1  28 15840.5 1933.18   1
   3   1  28 18660.5 2190.62   4
   3  -1  29 613.210 429.000   1
   3   1  29 654.120 362.320   1
   3   1  29 970.029 595.512   4
   3  -1  30 962.182 517.517   1
   3   1  30 978.036 418.863   1
   3   1  30 958.544 489.935   4
   3  -1  31 4087.24 1040.71   1
   3   1  31 4490.11 860.226   1
   3   1  31 3603.21 1032.60   4
   3   1  32 2649.90 691.880   1
   3  -1  32 1954.93 738.149   1
   3   1  32 3566.42 1023.41   4
   3  -1  33 702.933 444.866   1
   3  -1  33-138.143 365.682   5
   3   1  33 466.497 443.340   4
   3  -1  34 427.425 373.483   1
   3  -1  34-330.722 402.990   5
   3   1  34 437.889 409.132   4
   3  -1  35-268.828 319.561   1
   3  -1  35 631.919 630.682   5
   3   1  35 896.606 579.763   4
   3  -1  36 1174.88 582.017   1
   3  -1  36 1705.58 930.971   5
   3   1  36 1071.99 594.464   4
   3   1  37 305.930 382.936   4
   3   1  38-62.4385 205.282   4
  -3   2  38 724.950 667.139   5
  -3   2  37 1078.63 767.152   5
  -3  -2  37 1034.03 789.600   5
  -3   2  36 748.756 664.674   5
  -3  -2  36 1185.18 914.183   5
  -3   2  35 3573.66 1309.35   5
  -3  -2  35 2541.68 1192.24   5
  -3   2  34 1958.20 961.511   5
  -3  -2  34 1873.28 1064.62   5
  -3   2  33 5010.22 1447.67   5
  -3  -2  33 5013.79 1640.11   5
  -3   2  32 365.877 434.239   5
  -3  -2  32 734.221 779.466   5
  -3   2  31 755.203 584.961   5
  -3  -2  31-936.991 698.816   5
  -3   2  30 2905.44 1123.28   5
  -3  -2  30 1685.09 820.645   5
  -3   2  29 1461.06 766.451   5
  -3  -2  29 1111.56 745.379   5
  -3   2  28 9946.56 1840.72   5
  -3  -2  28 10554.8 2170.21   5
  -3   2  27 433.757 422.112   5
  -3  -2  27-435.673 537.515   5
  -3   2  27-360.394 376.703   4
  -3   2  26 1449.78 688.919   5
  -3  -2  26 1308.25 708.747   5
  -3   2  26 721.672 498.357   4
   3   2 -25 912.872 446.226   1
  -3  -2  25 226.063 363.813   5
  -3   2  25 801.810 393.814   5
  -3   2  25 607.243 502.101   4
   3   2 -24 3459.05 886.818   1
  -3   2  24 3846.53 1055.85   5
  -3  -2  24 3861.15 1222.44   5
  -3   2  24 3943.16 943.488   4
  -3   2  23 171.986 249.457   3
   3   2 -23 690.872 444.651   1
  -3   2  23 407.108 387.422   5
  -3  -2  23 856.445 610.096   5
  -3   2  23-192.197 296.289   4
   3   2 -22 367.095 269.819   1
  -3  -2  22 1442.26 929.271   5
  -3   2  22 1638.56 672.229   5
  -3   2  22 1092.20 606.499   4
   3   2 -22 47.7107 234.751   4
   3   2 -21 67182.4 3829.90   1
  -3  -2  21 75163.1 5015.08   5
  -3   2  21 66642.1 4027.82   5
  -3   2  21 65776.2 3719.10   3
  -3   2  21 67414.5 3667.40   4
   3   2 -21 69759.9 3538.32   4
   3   2 -20 28742.5 2469.50   1
  -3  -2  20 32378.7 3262.33   5
  -3   2  20 29064.6 2595.69   5
  -3   2  20 30155.1 2417.87   4
  -3   2  20 26245.4 2344.97   3
   3   2 -19 5594.94 1076.50   1
   3   2 -19 6105.09 1273.30   5
  -3  -2  19 6891.82 1535.78   5
  -3   2  19 6653.00 1234.00   5
  -3   2  19 6989.71 1137.62   4
   3  -2 -19 7647.00 1295.92   4
  -3   2  19 6324.80 1141.78   3
  -3   2  18 1378.86 520.180   3
   3   2 -18 763.973 383.170   1
  -3  -2  18 1185.37 677.727   5
  -3   2  18 1240.35 566.315   5
   3   2 -18 802.631 487.696   5
  -3   2  18 2025.40 639.374   4
   3  -2 -18 826.900 425.860   4
  -3   2  17 4131.57 867.380   3
   3   2 -17 3170.69 793.006   1
  -3  -2  17 4612.08 1207.94   5
   3   2 -17 3781.24 945.957   5
  -3   2  17 3431.94 763.556   4
   3  -2 -17 4889.65 990.307   4
  -3   2  16 845.806 394.956   3
   3   2 -16 1134.03 463.439   1
  -3  -2  16 900.395 595.685   5
   3   2 -16 1016.11 505.949   5
  -3   2  16 936.874 446.331   4
   3  -2 -16 1338.19 542.777   4
  -3   2  15 490.158 333.858   3
   3   2 -15 510.554 310.341   1
   3   2 -15 308.864 248.463   5
  -3  -2  15-103.374 504.426   5
  -3   2  15 297.250 271.556   4
   3  -2 -15 337.385 262.598   4
   3   2 -14 9335.92 1275.89   1
   3  -2 -14 8705.75 529.105   1
  -3   2  14 7993.26 1122.38   5
   3   2 -14 8970.57 1436.83   5
  -3  -2  14 10763.6 1696.74   5
   3  -2 -14 9607.02 1284.24   4
  -3   2  14 9365.70 1153.36   4
  -3   2  14 8741.41 1186.20   3
   3   2 -13 29383.8 2221.13   1
   3  -2 -13 29040.7 1099.23   1
  -3  -2  13 27477.5 2670.30   5
  -3   2  13 28263.0 2015.39   5
   3   2 -13 29784.6 2546.57   5
   3  -2 -13 30722.7 2221.28   4
  -3   2  13 29222.9 2147.29   3
  -3   2  12 740.618 394.664   3
   3   2 -12 293.264 275.665   1
   3  -2 -12 255.067 142.716   1
  -3   2  12 770.971 339.142   5
   3   2 -12 203.816 336.899   5
  -3  -2  12-80.3167 310.169   5
   3  -2 -12 615.864 331.228   4
   3   2 -11 17969.4 1665.56   1
   3  -2 -11 16421.8 955.205   1
  -3   2  11 16219.4 1415.80   5
  -3  -2  11 18251.5 2074.36   5
   3   2 -11 16833.8 1854.24   5
  -3  -2  11 15387.8 998.982   3
   3  -2 -11 17658.2 1525.13   3
   3  -2 -11 17783.5 1580.15   4
  -3   2  11 18081.9 1653.81   3
   3  -2 -10 38571.9 1540.76   1
   3   2 -10 38306.6 2774.44   5
  -3   2  10 37056.5 2049.25   5
  -3  -2  10 38272.2 2974.01   5
   3  -2 -10 41402.5 2322.21   4
   3  -2 -10 39861.0 2285.34   3
  -3   2  10 39833.6 2414.48   3
  -3  -2  10 38694.2 1556.30   3
   3  -2  -9 84302.2 2369.40   1
  -3   2   9 84770.9 2942.60   5
   3   2  -9 84341.7 4086.16   5
  -3  -2   9 88020.5 4400.74   5
   3  -2  -9 81376.9 3139.97   4
   3  -2  -9 85174.2 3336.01   3
  -3   2   9 81620.2 2912.22   4
  -3   2   9 79777.6 3367.09   3
  -3  -2   9 82735.3 2238.00   3
   3   2  -8 17953.4 1472.11   2
   3  -2  -8 17120.1 1116.24   1
  -3   2   8 15453.8 1195.06   5
   3   2  -8 17519.1 1864.86   5
  -3  -2   8 18656.7 2015.14   5
   3  -2  -8 18389.1 1561.52   3
   3  -2  -8 18305.2 1447.80   4
  -3   2   8 19123.2 1389.28   4
  -3  -2   8 17324.9 1022.87   3
   3   2  -7 9455.57 1049.72   2
   3  -2  -7 10194.3 878.140   1
   3   2  -7 9670.24 1379.54   5
  -3  -2   7 9876.05 1464.13   5
  -3   2   7 10541.9 951.336   5
  -3  -2   7 9168.38 737.006   3
   3  -2  -7 10298.7 1033.58   4
  -3   2   7 10380.0 972.331   4
   3  -2  -7 10327.9 1182.47   3
   3  -2  -6 881.350 382.156   3
   3   2  -6 473.408 212.425   2
  -3  -2   6 823.316 236.128   3
   3  -2  -6 657.876 268.486   1
  -3  -2   6 1042.66 465.310   5
   3   2  -6 1125.67 516.369   5
  -3   2   6 940.605 274.040   5
  -3   2   6 1298.98 367.170   4
   3  -2  -6 923.110 305.563   4
  -3  -2   5 24.4168 105.021   3
   3  -2  -5-74.9174 199.155   3
   3   2  -5-178.274 245.841   2
   3  -2  -5 75.7424 128.078   1
  -3  -2   5-410.879 386.301   5
  -3   2   5 17.5151 95.1732   5
   3   2  -5 210.716 231.779   5
   3  -2  -5-21.1818 111.511   4
  -3   2   5-15.6364 112.335   4
   3   2  -4 2853.86 556.652   2
   3  -2  -4 3078.21 546.480   1
  -3   2   4 2732.75 373.282   5
  -3  -2   4 2150.84 652.067   5
   3   2  -4 3001.11 777.703   5
   3  -2  -4 3257.14 502.916   4
  -3   2   4 2727.12 439.762   4
   3  -2  -4 2424.34 546.149   3
   3   2  -4 2413.79 416.334   3
  -3  -2   3 38466.4 1995.93   2
   3   2  -3 40652.6 2053.87   2
   3  -2  -3 40027.7 1913.57   1
  -3   2   3 37809.9 1163.96   5
   3   2  -3 40635.3 2781.65   5
  -3  -2   3 40632.0 2752.23   5
  -3   2   3 36934.9 1477.72   4
   3  -2  -3 39461.1 1661.60   4
   3   2  -3 38487.1 1696.64   3
   3   2  -2 12386.4 1139.33   2
   3  -2  -2 12213.6 802.851   2
  -3  -2   2 11916.1 1114.76   2
   3  -2  -2 14202.3 1186.28   1
  -3  -2   2 13374.3 1560.34   5
   3   2  -2 11525.0 1482.74   5
  -3   2   2 12316.0 801.609   4
   3   2  -2 12527.2 990.752   3
   3  -2  -2 12130.0 872.302   4
   3  -2  -1 12528.9 773.480   2
   3   2  -1 14043.3 1227.40   2
  -3  -2   1 13171.4 1166.15   2
   3  -2  -1 15885.9 1290.81   1
   3   2  -1 12770.9 1546.12   5
  -3  -2   1 14342.1 1604.74   5
   3  -2  -1 12163.1 810.560   4
   3   2  -1 12384.5 1021.06   3
   3   2   0 112210. 3476.11   2
  -3  -2   0 109331. 3393.77   2
   3  -2   0 107006. 2160.43   2
   3  -2   0 115423. 3476.19   1
   3   2   0 104512. 4435.70   5
   3  -2   0 107464. 2192.45   4
   3   2   0 106549. 3060.17   3
   3   2   1 72741.4 2841.91   2
   3  -2   1 70865.2 1702.66   2
  -3  -2  -1 71202.7 2780.13   2
   3  -2   1 75287.1 2918.83   1
   3   2   1 72118.1 3691.03   5
   3   2   1 69383.5 2523.39   3
   3  -2   1 67295.3 1564.23   4
  -3  -2  -2 153788. 4153.51   2
   3   2   2 153757. 4217.00   2
   3  -2   2 160471. 2588.23   2
   3  -2   2 159835. 4271.67   1
   3  -2   2 154152. 2307.99   5
   3   2   2 150984. 5314.35   5
   3   2   2 148381. 3789.55   3
   3  -2   3 39892.2 1336.81   2
  -3   2  -3 36685.1 1271.31   2
  -3  -2  -3 37557.3 2093.45   2
   3   2   3 37934.5 2108.42   2
   3   2   3 37259.2 2635.32   5
   3   2   4 2080.04 504.765   2
  -3   2  -4 2110.19 319.445   2
  -3  -2  -4 2259.45 523.472   2
   3  -2   4 2217.43 329.029   2
   3   2   4 1963.29 622.004   5
   3   2   5 105307. 3670.25   2
   3  -2   5 107078. 2441.98   2
  -3   2  -5 107927. 2380.40   2
  -3  -2  -5 111975. 3794.59   2
   3   2   6 22724.2 1753.71   2
   3  -2   6 22915.6 1173.41   2
  -3  -2  -6 22456.2 1757.28   2
  -3   2  -6 23207.6 1175.56   2
  -3   2  -7 24345.2 1276.77   2
  -3  -2  -7 22677.6 1815.42   2
  -3   2  -8 174361. 3673.71   2
  -3  -2  -8 184176. 5287.94   2
  -3  -2  -9 145.056 251.467   2
  -3   2  -9 121.633 145.524   2
  -3  -2 -10 71570.6 3431.16   2
  -3   2 -10 69440.2 2548.09   2
  -3  -2 -11 27294.4 2188.60   2
  -3   2 -11 24698.5 1590.23   2
  -3   2 -12 11195.2 1115.91   2
   3   2  12 11858.6 1443.35   2
  -3  -2 -12 13371.1 1571.55   2
   3  -2  13 14763.5 1651.57   1
  -3   2 -13 16082.9 1399.72   2
   3   2  13 15346.6 1687.28   2
  -3  -2 -13 16536.6 1792.09   2
   3  -2  14 6628.23 1142.19   1
   3   2  14 7593.53 1207.58   2
  -3   2 -14 7630.63 1011.82   2
  -3  -2 -14 7125.58 1208.25   2
   3   2  14 9064.14 1327.91   4
   3  -2  15 5847.09 1102.46   1
   3   2  15 7624.00 1260.40   2
  -3  -2 -15 7360.63 1244.53   2
  -3   2 -15 6345.71 954.314   2
   3   2  15 6097.34 1109.35   4
   3  -2  16 14559.1 1686.78   1
  -3  -2 -16 14787.4 1817.62   2
  -3   2 -16 13973.2 1454.82   2
   3   2  16 13618.9 1705.61   4
  -3   2 -17 335.433 280.539   2
  -3  -2 -17 316.809 276.458   2
   3  -2  17 553.504 371.201   1
   3   2  17-76.5003 320.418   4
  -3   2 -18 316.488 270.501   2
   3  -2  18 238.399 401.736   1
  -3   2 -18 388.226 214.775   4
   3   2  18 399.552 270.457   4
   3  -2  19 11957.8 1619.12   1
  -3   2 -19 11704.7 1477.81   2
  -3   2 -19 10860.5 1098.16   4
   3   2  19 10394.0 1558.71   4
  -3   2 -20 159.131 233.774   2
   3  -2  20 1030.33 505.353   1
  -3   2 -20 488.106 296.351   4
   3   2  20 467.872 414.573   4
   3  -2  21 240.437 328.701   1
  -3   2 -21-149.282 253.878   2
  -3   2 -21-99.6221 146.183   4
   3   2  21 14.5657 455.647   4
  -3   2 -22-254.464 264.383   2
   3  -2  22 106.859 269.839   1
   3   2  22-92.3788 408.684   4
  -3   2 -22 158.259 176.493   4
  -3   2 -23 12734.9 1723.17   2
   3  -2  23 12427.9 1756.31   1
   3  -2  23 14058.7 1983.14   5
  -3   2 -23 12774.7 1403.65   4
   3   2  23 13181.8 1875.46   4
   3  -2  24 4009.51 1047.92   1
   3  -2  24 2884.65 978.331   5
   3   2  24 3102.54 951.453   4
  -3   2 -24 3141.95 728.584   4
   3  -2  25 1107.55 599.956   1
   3  -2  25 480.330 437.554   5
   3   2  25 1412.21 708.488   4
  -3   2 -25 1172.38 455.543   4
   3  -2  26 541.983 430.991   1
   3  -2  26-89.0031 249.860   5
   3   2  26-43.6143 363.195   4
  -3   2 -26 263.728 238.734   4
   3  -2  27 615.889 457.940   1
   3  -2  27 783.045 567.085   5
   3   2  27 1184.18 614.009   4
  -3   2 -27 700.997 403.569   4
   3  -2  28 1686.48 724.649   1
   3  -2  28 2728.89 1003.02   5
   3   2  28 2890.28 931.478   4
   3  -2  29 2675.79 908.435   1
   3  -2  29 4860.93 1395.42   5
   3   2  29 3004.91 975.800   4
   3  -2  30 2.56771 279.302   1
   3  -2  30 761.467 563.051   5
   3   2  30 221.468 340.143   4
   3  -2  31-370.573 424.947   1
   3   2  31-526.510 474.538   4
   3  -2  32-371.196 423.144   1
   3  -2  32 107.604 231.859   5
   3  -2  33 90.7633 293.729   1
   3  -2  33 536.500 491.277   5
   3   2  33 660.262 488.469   4
   3  -2  34-198.617 330.466   1
   3  -2  34 274.451 301.794   5
   3   2  34-744.048 545.026   4
   3  -2  35 4.09789 363.616   5
   3   2  35 577.833 512.364   4
   3  -2  36 186.857 295.679   1
   3  -2  36 252.807 415.083   5
   3   2  36 323.405 411.772   4
   3  -2  37-224.108 328.525   1
   3  -2  38 1127.30 665.006   1
  -3   3  37 1836.80 971.831   5
  -3   3  36 439.635 531.334   5
  -3   3  35-453.330 542.108   5
  -3  -3  35 863.427 787.627   5
  -3  -3  34 844.316 772.128   5
  -3   3  34 925.336 686.968   5
  -3   3  33 3979.48 1317.84   5
  -3  -3  33 2495.63 1269.40   5
  -3   3  32 608.630 508.601   5
  -3  -3  32 1416.61 1037.88   5
  -3   3  32 270.700 230.550   4
  -3   3  31 1423.86 761.097   5
  -3  -3  31 791.583 700.252   5
  -3   3  31 1489.98 632.373   4
  -3  -3  30 1042.66 755.471   5
  -3   3  30 754.693 547.822   5
  -3   3  30 1199.77 616.050   4
  -3  -3  29 3753.53 1416.67   5
  -3   3  29 2463.02 953.504   5
  -3   3  29 2374.77 873.750   4
  -3   3  28 710.268 539.526   5
  -3  -3  28-289.419 528.455   5
  -3   3  28-210.212 346.981   4
  -3  -3  27 2290.60 1052.57   5
  -3   3  27 2314.98 891.187   5
  -3   3  27 1910.82 752.932   4
  -3  -3  26 1394.60 864.815   5
  -3   3  26 1040.09 579.171   5
  -3   3  26 628.712 432.422   4
  -3  -3  25 4639.61 1474.12   5
  -3   3  25 4569.40 1164.41   5
  -3   3  25 3925.39 1060.65   4
  -3   3  24 18000.6 2264.84   5
  -3  -3  24 14765.7 2511.29   5
  -3   3  24 18610.2 2188.26   4
  -3  -3  23 7580.99 1841.06   5
  -3   3  23 5889.25 1285.35   5
  -3   3  23 7275.02 1386.37   4
  -3  -3  22 2134.25 991.704   5
  -3   3  22 2781.01 859.303   5
  -3   3  22 2559.20 806.627   4
  -3   3  21 2496.97 777.745   5
  -3  -3  21 1079.33 719.152   5
  -3   3  21 2046.34 701.959   4
  -3   3  20 1840.27 720.822   5
  -3  -3  20 1457.44 801.527   5
  -3   3  20 1821.08 655.159   4
  -3   3  19 545.869 424.337   5
  -3  -3  19 586.254 553.902   5
  -3   3  19 610.679 405.159   4
  -3   3  18 625.632 393.406   5
  -3  -3  18 360.461 403.618   5
  -3   3  18 1065.87 501.102   4
  -3  -3  17 17003.6 2391.78   5
   3   3 -17 16188.9 2146.73   5
  -3   3  17 18446.3 1900.74   4
   3  -3 -17 16185.5 1953.14   4
  -3   3  17 16480.0 1990.98   3
  -3   3  16 252.183 270.245   3
   3   3 -16-435.960 574.215   5
  -3  -3  16-41.3289 331.195   5
   3  -3 -16-210.225 247.610   4
  -3   3  16 433.859 339.161   4
  -3   3  15 1307.45 542.696   3
   3   3 -15 988.973 491.189   1
   3   3 -15 1031.71 574.604   5
  -3  -3  15 1582.38 807.673   5
   3  -3 -15 1090.68 492.803   4
  -3   3  15 1853.17 618.644   4
   3   3 -14-143.126 274.338   1
  -3  -3  14-125.871 318.529   5
  -3   3  14 225.347 228.780   5
   3   3 -14 96.5834 172.608   5
  -3  -3  14-103.932 154.730   3
  -3   3  14 41.6166 155.722   3
   3  -3 -14-323.933 257.130   4
  -3   3  14-97.7981 261.082   4
   3   3 -13 1185.60 574.168   1
   3  -3 -13 742.883 231.876   1
   3   3 -13 576.985 423.648   5
  -3   3  13 499.012 274.638   5
  -3  -3  13 1111.17 699.961   5
  -3  -3  13 299.867 218.428   3
  -3   3  13 402.393 330.627   3
   3  -3 -13 264.503 245.263   4
  -3   3  13 368.225 280.531   4
   3  -3 -12 8803.18 857.869   1
   3   3 -12 10238.9 1505.80   1
  -3   3  12 8808.04 1043.14   5
   3   3 -12 9372.64 1526.75   5
  -3  -3  12 9436.18 1665.09   5
   3  -3 -12 8371.12 1234.82   4
  -3   3  12 8515.77 1163.14   4
  -3   3  12 8914.30 1387.98   3
   3  -3 -12 7772.27 1205.23   3
  -3  -3  12 8195.74 959.085   3
   3  -3 -11 105.476 253.630   3
  -3  -3  11 184.180 195.187   3
   3  -3 -11 369.946 196.578   1
   3   3 -11-138.291 197.671   1
  -3  -3  11 214.179 383.879   5
   3   3 -11 1110.41 556.676   5
  -3   3  11 265.677 211.109   5
  -3   3  11 512.899 345.274   3
   3  -3 -11 860.904 387.592   4
   3   3 -10 11220.8 1524.45   1
   3  -3 -10 10702.3 1025.76   1
  -3  -3  10 10422.5 1681.11   5
  -3   3  10 9275.78 983.455   5
   3   3 -10 9652.93 1508.07   5
   3  -3 -10 9855.34 1271.07   4
   3  -3 -10 8876.21 1263.88   3
  -3   3  10 9861.94 1412.47   3
  -3  -3  10 9898.29 1038.97   3
   3  -3  -9 4974.67 1044.55   3
   3   3  -9 2503.50 741.851   1
   3  -3  -9 3957.67 672.366   1
  -3   3   9 3036.26 557.305   5
  -3  -3   9 4114.33 1043.32   5
   3   3  -9 3462.74 966.812   5
   3  -3  -9 2730.14 662.376   4
  -3  -3   9 4394.46 717.183   3
   3   3  -8 4051.56 747.134   2
   3  -3  -8 6020.72 1041.69   3
   3   3  -8 4779.80 999.544   1
   3  -3  -8 5492.07 792.808   1
  -3   3   8 4994.99 629.359   5
   3   3  -8 4476.80 1040.72   5
  -3  -3   8 6140.43 1257.87   5
  -3  -3   8 5421.21 777.737   3
   3  -3  -8 4690.94 828.183   4
   3   3  -7 4923.96 805.449   2
   3  -3  -7 4869.95 963.132   3
   3   3  -7 5326.30 1009.68   1
   3  -3  -7 5222.44 775.244   1
  -3  -3   7 4067.62 1042.45   5
   3   3  -7 6201.73 1200.58   5
  -3   3   7 5535.81 599.914   5
  -3  -3   7 4776.05 718.729   3
   3  -3  -7 5148.03 843.419   4
  -3   3   7 4724.45 744.738   4
  -3  -3   6 2296.28 506.176   3
   3   3  -6 1641.25 482.179   2
   3   3  -6 2538.59 705.440   1
   3  -3  -6 2382.50 547.715   1
   3   3  -6 1471.63 637.585   5
  -3  -3   6 1525.98 666.025   5
  -3   3   6 2047.08 329.854   5
   3  -3  -6 1714.09 486.618   4
  -3   3   6 2501.02 517.422   4
   3   3  -5 36.2142 176.645   2
  -3  -3   5 70.9798 208.382   3
   3  -3  -5 398.556 259.843   1
   3   3  -5-737.104 447.576   5
  -3  -3   5 35.0633 381.931   5
   3  -3  -5-150.166 150.220   4
  -3   3   5 252.839 193.250   4
   3   3  -4 6700.33 898.151   2
   3  -3  -4 5591.01 868.369   1
  -3  -3   4 5997.39 1182.50   5
   3   3  -4 7644.99 1353.24   5
  -3   3   4 6404.76 769.808   4
  -3  -3   4 6611.89 848.460   3
   3   3  -3 4019.98 726.266   2
   3  -3  -3 3873.79 771.078   1
   3   3  -3 4040.68 973.271   5
  -3   3   3 3550.56 565.478   4
  -3  -3   3 2974.13 856.809   5
  -3  -3   2 1183.63 367.201   2
   3  -3  -2 1253.93 210.225   2
   3   3  -2 644.684 312.428   2
   3  -3  -2 1503.67 493.135   1
   3   3  -2 1356.66 590.106   5
  -3   3   2 1162.76 329.668   4
   3   3  -2 1281.78 431.844   3
  -3  -3   2 1685.23 695.914   5
   3   3  -1 54643.9 2626.06   2
  -3  -3   1 52007.5 2512.74   2
   3  -3  -1 51460.1 1141.30   2
   3  -3  -1 51539.0 2747.59   1
   3   3  -1 49221.6 3385.26   5
  -3   3   1 50848.6 1844.61   4
   3   3  -1 52394.7 2638.80   3
   3   3   0 6876.30 950.862   2
  -3  -3   0 7361.48 954.715   2
   3  -3   0 8027.68 1116.90   1
   3   3   0 6415.44 1242.60   5
  -3   3   0 7048.33 649.732   4
   3   3   0 6989.37 986.142   3
   3   3   1 2124.39 558.042   3
  -3  -3  -1 2423.03 556.677   2
   3   3   1 1870.72 522.328   2
   3  -3   1 1918.00 553.514   1
   3   3   1 2581.42 789.596   5
  -3   3  -1 2178.78 332.971   4
  -3  -3  -2 145.715 182.049   2
   3   3   2 161.824 190.832   3
   3   3   2-41.1125 192.573   2
   3  -3   2-129.494 233.092   1
   3   3   2-77.2496 289.665   5
  -3   3  -2 38.0695 67.2842   4
  -3  -3  -3 6937.86 976.712   2
   3  -3   3 8539.23 1210.14   1
   3   3   3 6981.71 1309.07   5
  -3   3  -3 7770.13 475.331   4
   3   3   3 7331.03 1070.72   3
  -3  -3  -4 7819.74 1054.88   2
   3  -3   4 8460.15 1192.01   1
   3   3   4 8084.85 1411.70   5
   3   3   4 8227.49 1145.10   3
   3   3   5 1170.85 466.997   3
  -3  -3  -5 1700.11 502.214   2
   3  -3   5 2231.40 726.709   1
   3  -3   5 1587.66 292.997   5
   3   3   5 1820.61 672.093   5
  -3  -3  -6 30676.0 2193.01   2
   3  -3   6 39430.9 2698.25   1
   3  -3   6 32807.9 1461.37   5
   3   3   6 32547.7 2871.89   5
   3   3   6 34514.5 2434.39   3
  -3  -3  -7 13597.5 1487.06   2
  -3   3  -7 15410.7 693.601   2
   3  -3   7 14993.4 1089.60   5
   3   3   7 15819.9 2024.72   5
   3   3   7 15304.0 1645.91   3
  -3  -3  -8 341.897 251.329   2
  -3   3  -8 569.617 163.300   2
   3   3   8 589.760 325.753   3
   3  -3   8 1017.67 472.527   1
   3  -3   8 86.5046 136.150   5
  -3  -3  -9 5265.32 976.213   2
   3   3   9 6803.52 1173.58   2
  -3   3  -9 5441.06 552.925   2
   3  -3   9 8816.37 1380.07   1
   3  -3   9 5968.67 811.630   5
   3   3   9 5856.82 1068.84   3
  -3  -3 -10 557.354 350.078   2
   3   3  10 1399.39 534.655   3
  -3   3 -10 709.768 222.621   2
   3   3  10 671.950 457.961   2
   3  -3  10 907.282 475.144   1
   3  -3  10 593.079 303.180   5
  -3   3 -11 362.645 185.991   2
  -3  -3 -11 826.918 419.059   2
   3   3  11 489.926 310.335   3
   3  -3  11 1197.18 519.605   1
   3   3  11 277.627 292.032   2
   3  -3  11 180.226 163.458   5
   3   3  11 26.2552 220.826   4
  -3   3 -12 1091.26 325.136   2
  -3  -3 -12 573.927 292.426   2
   3  -3  12 1117.68 515.906   1
   3   3  12 99.3317 261.343   2
   3  -3  12 1631.28 525.231   5
   3   3  12 802.066 395.746   4
  -3  -3 -13 4786.38 1021.57   2
  -3   3 -13 4207.37 652.543   2
   3  -3  13 4741.77 1067.90   1
   3   3  13 4483.62 983.575   2
   3  -3  13 4375.00 825.778   5
   3   3  13 4495.95 1038.49   4
  -3  -3 -14 9324.20 1456.00   2
  -3   3 -14 7751.21 929.437   2
   3   3  14 7634.61 1306.50   2
   3  -3  14 8706.41 1453.99   1
   3  -3  14 7420.70 1115.21   5
   3   3  14 9225.04 1511.63   4
  -3   3 -15 47104.8 2394.03   2
  -3  -3 -15 48171.1 3361.62   2
   3  -3  15 46070.5 3346.64   1
   3  -3  15 46579.0 2862.13   5
   3   3  15 44509.9 3318.53   4
  -3   3 -16 5474.52 865.967   2
   3  -3  16 5254.83 1196.16   1
   3  -3  16 5910.04 1068.11   5
   3   3  16 6610.65 1311.60   4
  -3   3 -17 2763.01 639.089   2
   3  -3  17 3235.35 973.911   1
   3  -3  17 2800.08 783.652   5
   3   3  17 2866.91 876.872   4
  -3   3 -18 6664.08 1038.21   2
   3  -3  18 11606.8 1789.92   1
   3  -3  18 9429.47 1424.36   5
   3   3  18 12688.9 1857.02   4
  -3   3 -19 673.672 360.117   2
   3  -3  19 2125.60 771.202   1
   3  -3  19 1481.20 689.559   5
   3   3  19 1045.10 584.703   4
  -3   3 -20 22025.4 1999.42   2
   3  -3  20 21885.0 2463.33   1
   3  -3  20 21464.8 2263.45   5
   3   3  20 21935.6 2493.00   4
  -3   3 -21 2502.00 706.176   2
   3  -3  21 2792.06 885.587   1
   3  -3  21 2656.07 827.443   5
  -3   3 -21 2370.42 489.501   4
   3   3  21 2104.72 798.395   4
  -3   3 -22 4003.89 898.227   2
   3  -3  22 4577.04 1182.23   1
   3  -3  22 3333.11 995.712   5
  -3   3 -22 4134.23 673.058   4
   3   3  22 5343.28 1286.58   4
  -3   3 -23 7149.72 1248.57   2
   3  -3  23 6479.18 1388.57   1
   3  -3  23 6234.64 1344.10   5
  -3   3 -23 7963.16 974.277   4
   3   3  23 7779.52 1561.18   4
  -3   3 -24 875.521 478.520   2
   3  -3  24 1470.15 715.849   1
   3  -3  24 1795.40 760.121   5
   3   3  24 1275.64 710.098   4
   3  -3  25 481.536 426.811   1
   3  -3  25-178.811 243.937   5
   3   3  25 27.3147 277.444   4
   3  -3  26-28.0340 104.090   5
   3   3  26 320.031 391.270   4
   3  -3  27 1233.83 715.375   1
   3  -3  27 1737.10 799.986   5
   3   3  27 1566.84 756.745   4
   3  -3  28-861.397 540.624   1
   3  -3  28 387.079 458.724   5
   3   3  28 417.777 495.893   4
   3  -3  29-41.6405 231.947   1
   3  -3  29 794.709 592.557   5
   3   3  29 87.3022 272.355   4
   3  -3  30 594.999 505.526   1
   3  -3  30 1718.21 845.083   5
   3   3  30 1440.47 783.895   4
   3  -3  31 2032.30 905.216   1
   3  -3  31 1309.20 758.042   5
   3   3  31 1834.15 874.026   4
   3  -3  32 1175.19 733.312   1
   3  -3  32 307.590 450.683   5
   3   3  32 1459.10 769.054   4
   3  -3  33 1150.45 652.754   1
   3  -3  33 593.841 606.360   5
   3   3  33 6.63911 235.799   4
   3  -3  34-6.51438 306.454   1
   3  -3  34 1156.34 740.194   5
   3  -3  35 2778.67 1033.31   1
   3  -3  35 2995.84 1218.91   5
   3  -3  36 225.269 452.151   1
   3  -3  36-731.479 633.347   5
   3  -3  37 116.031 499.044   1
  -3   4  36 756.205 684.055   5
  -3   4  35 2062.17 1005.64   5
  -3   4  34 1611.03 862.663   5
  -3  -4  33 986.309 875.185   5
  -3   4  33-360.698 419.215   5
  -3  -4  32 1086.12 831.075   5
  -3   4  32-307.619 368.052   5
  -3   4  31 244.280 350.827   5
  -3  -4  31-228.192 544.131   5
  -3   4  31 3.08285 302.301   4
  -3   4  30 607.517 493.568   5
  -3  -4  30 98.2193 387.801   5
  -3   4  30 579.112 524.390   4
  -3  -4  29 14.2991 154.718   5
  -3   4  29 205.480 452.111   4
  -3   4  28-27.2087 213.773   5
  -3  -4  28 752.099 719.614   5
  -3   4  27 1083.58 618.683   5
  -3  -4  27-425.193 538.174   5
  -3   4  27 610.087 459.377   4
  -3   4  26 131.154 257.625   5
  -3   4  26 267.824 364.532   4
  -3   4  25 706.304 495.387   5
  -3  -4  25 142.834 352.544   5
  -3   4  25 137.254 313.943   4
  -3   4  24 2152.08 791.886   5
  -3  -4  24 158.701 345.220   5
  -3   4  24 1591.17 689.851   4
  -3   4  23 837.663 476.072   5
  -3  -4  23 2190.12 1031.34   5
  -3   4  23 625.841 457.452   4
  -3   4  22 1466.03 622.324   5
  -3  -4  22 1140.88 750.290   5
  -3   4  22 1566.28 674.264   4
  -3   4  21 1206.57 548.878   5
  -3  -4  21-439.545 489.010   5
  -3  -4  21 866.972 398.750   3
  -3   4  21 1385.17 638.765   4
  -3   4  20-52.5564 242.334   5
  -3  -4  20 827.108 684.269   5
  -3   4  20 481.359 408.028   4
  -3  -4  20 109.974 219.896   3
   3  -4 -19 3287.63 865.364   2
  -3   4  19 3637.78 880.370   5
  -3  -4  19 3717.21 1284.39   5
  -3  -4  19 3340.09 787.763   3
  -3   4  19 4074.73 1012.51   4
   3   4 -18 247.285 305.736   2
   3  -4 -18 1406.52 543.403   2
  -3   4  18 110.866 178.595   5
  -3  -4  18 315.956 463.044   5
  -3  -4  18 1066.84 479.875   3
  -3   4  18 138.513 264.250   4
   3   4 -17 164.487 182.276   2
   3  -4 -17-305.863 279.857   2
  -3  -4  17 523.927 496.102   5
  -3   4  17 125.746 332.030   4
  -3  -4  17 171.247 243.854   3
   3   4 -16 7393.27 1195.83   2
   3  -4 -16 5702.27 1052.15   2
  -3  -4  16 9343.32 1847.60   5
  -3  -4  16 6914.76 1086.02   3
  -3   4  16 7135.41 1262.55   4
   3   4 -15 13129.8 1545.51   2
   3  -4 -15 10236.8 1376.63   2
  -3  -4  15 13620.2 2194.52   5
  -3   4  15 11977.9 1591.19   4
   3   4 -14-17.3428 236.103   2
   3  -4 -14 248.945 301.428   2
  -3   4  14 545.686 313.527   5
  -3  -4  14-109.171 364.910   5
   3   4 -14 84.8375 176.518   5
  -3   4  14-242.100 306.757   4
   3  -4 -13 7733.08 1089.78   2
  -3   4  13 9657.37 1138.88   5
  -3  -4  13 7313.54 1593.02   5
   3   4 -13 8640.08 1578.46   5
  -3   4  13 8995.42 1320.66   4
   3  -4 -12 9813.51 1188.54   2
   3   4 -12 10799.4 1747.75   5
  -3   4  12 11295.5 1167.16   5
  -3  -4  12 11692.5 1981.46   5
  -3   4  12 11896.2 1489.10   4
   3  -4 -12 10423.0 1562.76   3
   3  -4 -11 1222.38 584.729   3
   3  -4 -11 819.661 366.286   2
  -3  -4  11 537.425 592.179   5
  -3   4  11 774.026 308.075   5
   3   4 -11 1046.67 579.368   5
  -3   4  11 1335.14 529.929   4
   3  -4 -10 4134.17 1029.17   3
   3  -4 -10 5167.80 801.453   2
   3  -4 -10 5394.63 862.951   1
  -3  -4  10 3776.10 1144.22   5
  -3   4  10 5195.11 680.485   5
   3   4 -10 4785.16 1132.30   5
  -3   4  10 4763.20 904.097   4
   3  -4  -9-348.327 537.912   3
   3  -4  -9 78.2878 150.351   1
   3  -4  -9 36.2461 89.9348   2
  -3   4   9 91.3588 127.253   5
  -3  -4   9 393.209 364.616   5
   3   4  -9-183.408 370.521   5
  -3   4   9 66.5232 282.289   4
   3  -4  -8 13951.5 1173.15   2
   3  -4  -8 15168.2 1522.86   1
  -3  -4   8 13396.8 1987.32   5
  -3   4   8 14265.4 929.482   5
   3   4  -8 12451.4 1859.77   5
   3  -4  -8 12941.7 1760.98   3
  -3   4   8 13923.1 1470.54   4
   3  -4  -7 67.6206 286.338   3
   3  -4  -7 58.6441 99.3026   2
   3  -4  -7 290.011 242.174   1
  -3  -4   7 421.663 424.215   5
  -3   4   7 150.097 114.390   5
   3   4  -7-563.739 394.486   5
  -3   4   7 111.378 82.7001   5
   3  -4  -6 233.233 299.069   3
   3  -4  -6 125.347 108.076   2
   3  -4  -6-235.046 245.747   1
   3   4  -6-795.564 461.524   5
  -3  -4   6-280.865 516.900   5
   3  -4  -5 12372.5 835.044   2
   3  -4  -5 12653.7 1474.31   1
   3   4  -5 13388.6 1916.96   5
  -3  -4   5 13211.1 1907.96   5
  -3  -4   5 12424.9 1401.09   3
   3  -4  -5 12050.9 1702.51   3
   3  -4  -4-19.8980 253.521   3
  -3  -4   4 327.888 349.731   3
   3  -4  -4-18.1472 64.9949   2
   3  -4  -4 821.908 416.187   1
   3   4  -4 4.63919 249.707   5
  -3  -4   4 459.829 411.615   5
  -3   4   4 402.730 303.463   4
   3   4  -3 33627.3 2818.70   1
   3  -4  -3 33308.4 2482.78   1
   3   4  -3 33819.1 3068.22   5
  -3   4   3 31892.8 1888.47   4
   3  -4  -3 31422.4 2719.22   3
   3  -4  -2 2653.57 818.271   3
   3   4  -2 2482.40 762.758   1
   3  -4  -2 2383.34 684.824   1
   3   4  -2 2867.43 911.042   5
  -3   4   2 2556.10 534.531   4
   3  -4  -1-187.314 471.505   3
  -3  -4   1 432.521 206.302   2
   3   4  -1 460.134 359.106   1
   3  -4  -1-161.623 264.269   1
  -3   4   1 478.194 237.123   4
  -3  -4   0 10351.1 1205.25   2
   3   4   0 10319.8 1522.15   1
   3  -4   0 10405.1 1454.79   1
   3   4   0 11070.2 1767.31   5
  -3   4   0 11101.3 981.882   4
   3   4   0 10325.1 1425.05   3
   3  -4   0 10551.8 1591.02   3
  -3  -4  -1 2788.50 646.022   2
   3  -4   1 3348.69 868.963   1
   3   4   1 3235.54 834.603   1
   3   4   1 2814.82 885.669   5
   3   4   1 2429.41 715.890   3
   3  -4   1 2370.65 797.344   3
  -3   4  -1 3283.16 516.112   4
  -3  -4  -2 178.023 135.382   2
   3   4   2 106.482 306.297   1
   3  -4   2-180.832 267.432   1
   3   4   2-47.3041 176.726   5
  -3   4  -2 213.559 148.094   4
   3   4   2 180.659 167.124   3
   3  -4   2-87.6917 277.704   3
  -3  -4  -3 15335.9 1531.29   2
   3  -4   3 16308.3 1879.62   1
   3   4   3 18641.6 2366.16   5
  -3   4  -3 17227.6 1003.34   4
   3  -4   3 15588.1 1949.10   3
   3   4   3 16023.7 1851.83   3
   3   4   4 982.491 461.732   3
  -3  -4  -4 1210.19 455.878   2
   3  -4   4 1216.43 572.797   1
   3   4   4 194.662 301.858   5
  -3   4  -4 1092.72 238.928   4
   3  -4   4 579.440 402.540   3
   3   4   5 6062.57 1177.49   3
  -3  -4  -5 4655.39 874.811   2
   3   4   5 5703.44 1013.26   2
   3  -4   5 5413.69 1092.55   1
   3   4   5 6533.59 1456.59   5
  -3   4  -5 5813.59 472.107   4
  -3  -4  -6-448.620 299.384   2
   3   4   6 316.097 295.721   3
   3   4   6-82.9400 213.030   2
   3  -4   6 67.4923 303.149   1
   3   4   6-375.024 391.050   5
  -3   4  -6 71.5548 65.8846   4
   3   4   7 867.004 456.556   3
  -3  -4  -7-35.4997 146.311   2
   3   4   7 275.102 297.442   2
   3  -4   7 401.092 394.041   1
   3  -4   7 911.903 234.547   5
   3   4   7 62.5023 293.012   5
  -3  -4  -8 3550.83 834.932   2
   3   4   8 4296.03 928.329   2
   3  -4   8 3405.38 970.313   1
   3  -4   8 3572.92 532.363   5
   3   4   8 3415.21 1100.77   5
  -3  -4  -9-289.199 269.541   2
   3   4   9-644.218 392.625   2
   3  -4   9 109.186 272.866   1
   3  -4   9 404.409 229.644   5
   3   4   9 659.960 483.950   5
  -3  -4 -10 797.593 406.367   2
   3   4  10-103.816 253.551   2
   3  -4  10 539.928 426.097   1
   3  -4  10 448.165 266.755   5
   3   4  10 183.439 306.306   5
   3   4  10 607.353 489.932   4
  -3  -4 -11 31.3261 99.9804   2
   3   4  11-568.378 396.884   2
   3  -4  11 582.921 491.323   1
   3  -4  11 709.296 330.354   5
   3   4  11-977.467 576.247   4
  -3  -4 -12 1056.67 516.798   2
  -3   4 -12 757.049 151.483   2
   3   4  12 724.774 460.890   2
   3  -4  12 920.746 490.511   1
   3  -4  12 943.692 391.323   5
   3   4  12 1054.88 600.610   4
  -3   4 -13 1671.48 290.947   2
  -3  -4 -13 1433.98 543.863   2
   3  -4  13 970.370 592.569   1
   3  -4  13 2087.05 586.753   5
   3   4  13 1037.38 617.441   4
  -3   4 -14 5006.14 571.797   2
   3  -4  14 3571.93 1057.81   1
   3  -4  14 4715.83 958.350   5
   3   4  14 4975.88 1206.53   4
  -3   4 -15 149.097 137.708   2
   3  -4  15-241.258 362.754   1
   3  -4  15 115.481 223.860   5
   3   4  15-42.2530 269.041   4
  -3   4 -16 326.940 199.590   2
   3  -4  16-59.0574 187.139   5
   3   4  16-266.501 362.378   4
  -3   4 -17 10156.1 1066.34   2
   3  -4  17 9458.90 1715.93   1
   3  -4  17 10376.6 1535.78   5
   3   4  17 12260.9 1926.40   4
  -3   4 -18 1028.32 392.065   2
   3  -4  18 710.800 460.190   1
   3  -4  18 1001.49 527.838   5
   3   4  18 977.357 611.541   4
  -3   4 -19 1391.64 435.286   2
   3  -4  19 1433.57 743.922   1
   3  -4  19 1011.07 556.799   5
   3   4  19 838.403 481.903   4
   3  -4  20-64.8302 288.789   1
   3   4  20-237.503 369.471   4
   3  -4  21 1581.34 753.384   1
   3  -4  21 2754.91 883.627   5
   3   4  21 3463.60 1101.63   4
   3  -4  22-245.980 375.407   1
   3  -4  22-360.019 387.386   5
   3   4  22-620.826 515.392   4
   3  -4  23 3032.47 1061.23   1
   3  -4  23 3171.52 1046.83   5
   3   4  23 2933.51 1032.71   4
   3  -4  24 932.894 629.975   1
   3  -4  24 1633.79 734.625   5
   3   4  24 681.249 551.601   4
   3  -4  25 2797.39 1048.98   1
   3  -4  25 2481.08 924.880   5
   3   4  25 1554.45 717.168   4
   3  -4  26 2636.58 1081.97   1
   3  -4  26 2262.92 941.683   5
   3   4  26 3794.30 1199.11   4
   3  -4  27 253.888 392.054   1
   3  -4  27 279.556 361.220   5
   3   4  27 1390.66 742.015   4
   3  -4  28 989.479 668.601   1
   3  -4  28 1960.94 877.274   5
   3   4  28-374.358 443.084   4
   3  -4  29 140.689 344.688   1
   3  -4  29 513.501 543.768   5
   3  -4  30-1305.04 763.345   1
   3  -4  30-91.8491 247.083   5
   3  -4  31 1829.48 879.969   1
   3  -4  31 2179.11 1026.90   5
   3  -4  32 7.26657 474.232   1
   3  -4  32 36.1298 249.858   5
   3  -4  33 1095.75 783.889   5
   3  -4  34-161.757 435.760   5
  -3  -5  31 249.508 411.664   5
  -3  -5  30-742.977 690.833   5
  -3  -5  29-1057.56 833.531   5
  -3  -5  28-834.809 780.738   5
  -3   5  28 727.068 580.637   4
  -3   5  27 1345.79 683.689   5
  -3  -5  27 964.668 394.243   5
  -3   5  27-79.4134 320.474   4
  -3  -5  26-945.939 790.512   5
  -3   5  26-24.9802 128.664   5
  -3   5  26 462.786 464.994   4
   3   5 -25 560.384 449.123   2
  -3  -5  25 1252.99 881.649   5
  -3   5  25 1388.71 653.614   5
  -3   5  25 1437.59 727.363   4
   3   5 -24-162.744 215.129   2
  -3  -5  24 355.268 366.234   3
  -3  -5  24 791.139 665.446   5
  -3   5  24 586.725 422.623   5
  -3   5  24-16.7840 193.551   4
  -3  -5  23 967.928 475.393   3
   3   5 -23 782.436 436.685   2
  -3  -5  23 2686.99 1175.39   5
  -3   5  23 1211.80 584.471   5
  -3   5  23 839.807 556.870   4
  -3  -5  22 1068.79 510.037   3
   3   5 -22 1455.40 578.259   2
  -3  -5  22 459.177 537.430   5
  -3   5  22 1219.06 572.663   5
  -3   5  22 1545.63 749.638   4
   3   5 -21 963.252 466.124   2
  -3  -5  21 183.664 238.164   3
  -3  -5  21 1186.13 749.406   5
  -3   5  21 509.464 350.112   5
  -3   5  21 66.7564 203.635   4
  -3  -5  20 794.081 440.960   3
   3   5 -20 9.04134 152.033   2
  -3   5  20-285.002 273.575   5
  -3  -5  20-51.8549 323.231   5
  -3   5  20 333.340 327.804   4
  -3  -5  19 280.554 328.066   3
   3   5 -19-202.543 265.388   2
  -3   5  19 323.551 301.584   5
  -3  -5  19-502.345 492.654   5
  -3   5  19-300.943 341.616   4
  -3  -5  18 1032.61 489.017   3
   3   5 -18 418.217 322.544   2
  -3   5  18 1378.41 522.062   5
  -3  -5  18-26.2158 296.880   5
  -3   5  18 1866.72 726.901   4
  -3  -5  17 1762.09 630.010   3
   3   5 -17 2210.07 668.329   2
  -3  -5  17 2379.22 1046.43   5
  -3   5  17 3045.14 904.094   4
  -3  -5  16-367.650 334.922   3
   3   5 -16 41.9940 153.608   2
  -3  -5  16-130.830 353.456   5
  -3   5  16 484.368 393.115   4
   3   5 -15 7679.11 1203.60   2
  -3  -5  15 7279.99 1755.28   5
  -3   5  15 8036.76 1115.44   5
  -3   5  15 8160.01 1414.91   4
  -3  -5  15 8781.20 1387.92   3
  -3  -5  14 506.401 384.352   3
   3   5 -14-68.6040 167.945   2
  -3   5  14 302.660 226.229   5
  -3  -5  14-391.313 474.732   5
  -3   5  14 764.793 468.671   4
  -3  -5  13-238.133 253.378   3
   3   5 -13 66.6192 159.983   2
  -3   5  13 170.507 180.542   5
  -3  -5  13 272.780 438.307   5
  -3   5  13-372.588 342.754   4
  -3  -5  12 1385.50 548.911   3
  -3   5  12 1455.15 373.484   5
  -3  -5  12 1333.77 741.398   5
  -3   5  12 1638.32 619.218   4
  -3  -5  11 1532.70 582.995   3
   3  -5 -11 2014.84 779.911   3
  -3   5  11 1681.07 413.906   5
  -3   5  11 1307.50 338.010   5
  -3  -5  11 1675.28 850.802   5
  -3   5  11 2135.21 670.800   4
  -3  -5  10 1257.06 550.144   3
   3  -5 -10 810.048 499.576   3
   3  -5 -10 417.445 218.265   2
  -3   5  10 506.087 194.150   5
  -3   5  10 690.501 242.713   5
  -3  -5  10 1033.89 592.549   5
  -3   5  10 670.361 376.721   4
   3  -5  -9 1806.37 764.318   3
  -3  -5   9 1399.06 564.461   3
   3  -5  -9 1616.84 383.635   2
  -3   5   9 1456.16 260.283   5
   3   5  -9 1017.64 582.426   5
  -3   5   9 1681.47 575.974   4
  -3  -5   9 913.211 588.462   5
  -3  -5   8-84.2502 242.676   3
   3  -5  -8 537.011 473.150   3
   3  -5  -8 95.3732 108.546   2
   3   5  -8 123.682 290.010   5
  -3  -5   8 886.778 664.896   5
  -3   5   8 125.321 220.091   4
  -3  -5   7 3976.24 936.073   3
   3  -5  -7 3190.70 440.703   2
   3  -5  -7 3583.93 999.090   3
   3   5  -7 2541.26 886.287   5
  -3   5   7 3408.06 772.964   4
  -3  -5   7 3809.10 1097.50   5
   3  -5  -6 6144.63 1351.63   3
  -3  -5   6 5645.33 1090.17   3
   3  -5  -6 6026.05 446.395   2
   3   5  -6 5065.69 1276.82   5
  -3   5   6 6066.26 1009.40   4
   3  -5  -5 598.565 510.252   3
  -3  -5   5 569.508 408.223   3
   3  -5  -5 397.860 323.845   1
   3   5  -5 517.882 376.947   5
  -3   5   5 799.935 375.439   4
   3  -5  -4 2891.65 982.132   3
   3  -5  -4 3199.21 856.508   1
   3   5  -4 3180.26 918.128   5
   3  -5  -3 15813.3 1894.94   1
   3   5  -3 12842.5 2009.30   5
   3  -5  -3 13147.1 1975.94   3
   3  -5  -2 1820.34 725.852   3
   3   5  -2 460.039 446.354   5
   3  -5  -2 3033.86 848.139   1
   3  -5  -1-309.012 475.937   3
   3  -5  -1 276.685 320.001   1
   3   5  -1-578.299 489.880   5
   3  -5   0 205.020 393.906   3
   3  -5   0 915.210 505.116   1
   3   5   0 1113.76 500.160   5
  -3   5   0 1420.42 415.641   4
   3  -5   1 1960.46 801.035   3
  -3  -5  -1 1830.36 548.576   2
   3  -5   1 3189.68 914.898   1
   3   5   1 1418.80 710.927   5
  -3   5  -1 2878.37 582.909   4
   3   5   2 10801.4 1384.95   2
  -3  -5  -2 10343.1 1309.93   2
   3  -5   2 11196.9 1709.27   1
   3   5   2 9506.42 1803.28   5
  -3   5  -2 10704.8 1019.65   4
   3  -5   2 10878.7 1830.11   3
  -3  -5  -3-263.201 241.734   2
   3   5   3-558.028 368.394   2
   3  -5   3 40.8238 393.808   1
   3   5   3-951.647 597.574   5
  -3   5  -3 100.219 132.980   4
  -3  -5  -4 1258.47 488.583   2
   3  -5   4 2190.50 857.706   3
   3   5   4 1449.74 557.667   2
   3  -5   4 2021.47 754.850   1
   3   5   4 777.313 567.298   5
  -3   5  -4 1488.90 353.536   4
   3   5   5 22368.7 2089.42   2
  -3  -5  -5 17714.9 1809.25   2
   3  -5   5 21540.7 2462.77   1
   3   5   5 20264.9 2725.23   5
  -3   5  -5 20238.2 1143.00   4
   3  -5   5 19613.1 2462.51   3
  -3  -5  -6 1191.73 486.339   2
   3   5   6 1038.01 492.332   2
   3  -5   6 1922.55 814.206   1
   3   5   6 1436.13 711.869   5
  -3   5  -6 1068.68 239.095   4
   3  -5   6 1166.94 669.184   3
   3   5   7 4668.64 990.914   2
   3  -5   7 4471.62 1164.26   1
  -3  -5  -7 3477.74 821.884   2
  -3   5  -7 4439.73 404.860   4
   3  -5   7 5441.80 1326.96   3
   3  -5   8 4834.11 1193.92   1
   3   5   8 5989.23 1136.85   2
  -3  -5  -8 6068.03 1146.40   2
   3  -5   8 3722.32 1122.18   3
   3   5   8 7131.41 1524.82   4
   3  -5   9 1329.03 660.424   1
   3   5   9 232.024 282.784   2
  -3  -5  -9 347.262 355.492   2
   3   5   9 539.384 468.502   4
   3  -5   9-267.503 399.376   3
   3  -5  10-53.1649 307.624   1
  -3  -5 -10-474.557 327.157   2
   3  -5  10-16.2436 46.9552   5
   3   5  10-177.562 358.940   4
   3  -5  11 480.822 458.900   1
   3  -5  11 141.402 167.851   5
   3  -5  12 371.949 477.121   1
   3   5  12 537.984 435.350   1
   3  -5  12 769.025 324.492   5
   3   5  12 858.841 600.674   4
   3  -5  13 538.841 538.638   1
   3   5  13-111.370 168.601   1
   3  -5  13 570.398 326.468   5
   3   5  13 515.705 492.605   4
   3  -5  14 498.349 459.716   1
   3  -5  14 168.689 221.382   5
   3   5  14-392.384 426.308   4
   3  -5  15 710.701 495.870   1
   3  -5  15 1405.41 530.457   5
   3   5  15 910.918 607.324   4
   3  -5  16 1617.81 784.095   1
   3   5  16 1326.41 686.940   4
   3  -5  17 203.851 351.087   1
   3   5  17 408.675 466.685   4
   3  -5  18 589.889 510.551   1
   3   5  18 987.509 660.812   4
   3  -5  19 3155.78 1144.20   1
   3   5  19 4344.94 1301.13   4
   3  -5  20-753.107 634.275   1
   3   5  20 455.606 469.123   4
   3  -5  21 812.655 592.791   1
   3   5  21 2025.39 949.133   4
   3  -5  22 181.651 396.427   1
   3   5  22 61.3330 296.033   4
   3  -5  23-35.0071 219.868   1
   3   5  23-400.126 527.221   4
   3  -5  24 976.141 664.677   1
   3   5  24-326.614 472.261   4
   3  -5  25-732.949 656.133   1
   3   5  25-638.456 605.421   4
  -3  -6  24-678.075 731.003   5
  -3   6  24-1071.93 625.175   4
  -3  -6  23 874.393 467.090   5
  -3   6  23-83.1545 332.011   4
  -3  -6  22 1716.52 950.175   5
  -3   6  22 12.0066 267.448   4
  -3  -6  21-106.043 315.781   5
  -3   6  21 225.127 338.405   4
  -3  -6  20-589.779 581.794   5
  -3   6  20 1292.33 666.242   4
  -3  -6  19 1315.01 602.281   3
  -3  -6  19 2508.61 1124.18   5
  -3   6  19 1192.70 637.495   4
  -3  -6  18 1088.60 557.031   3
  -3  -6  18 1085.34 738.483   5
  -3   6  18 1183.43 626.004   4
  -3  -6  17 1036.73 552.573   3
  -3  -6  17 1179.78 786.096   5
  -3   6  17 430.127 358.277   4
  -3  -6  16-424.653 408.216   3
  -3  -6  16-508.455 480.980   5
  -3   6  16 683.964 463.641   4
  -3  -6  15 2611.97 839.291   3
  -3  -6  15 3117.10 1166.64   5
  -3   6  15 2227.91 806.391   4
  -3  -6  14 1846.93 759.202   3
  -3  -6  14 1994.59 952.469   5
  -3   6  14 2675.33 902.967   4
  -3  -6  13 445.971 415.690   3
  -3  -6  13 135.717 329.816   5
  -3   6  13 396.938 386.371   4
  -3  -6  12 739.044 484.609   3
  -3  -6  12 1660.22 815.034   5
  -3   6  12 1361.58 605.544   4
  -3  -6  11 1803.20 739.362   3
  -3   6  11 1003.46 514.352   4
   3  -6 -10-522.261 512.521   3
  -3  -6  10 503.969 388.390   3
  -3   6  10 301.272 311.571   4
  -3  -6   9 537.114 430.609   3
   3  -6  -9 925.567 583.529   3
  -3   6   9 259.920 294.415   4
  -3  -6   8 1632.84 769.597   3
   3  -6  -8 976.925 607.282   3
  -3   6   8 1544.49 578.929   4
   3  -6  -7 901.003 605.264   3
  -3  -6   7 375.514 344.893   3
  -3   6   7 542.245 343.922   4
   3  -6  -6 1452.57 765.447   3
  -3   6   6 2028.28 678.484   4
   3  -6  -5-412.060 475.055   3
  -3   6   5 281.037 268.100   4
   3  -6  -4 328.311 446.267   3
  -3   6   4-310.066 246.914   4
   3  -6  -3-783.283 591.819   3
  -3   6   3 751.981 396.961   4
   3  -6  -2 198.773 386.822   3
  -3   6   2-236.936 216.316   4
   3   6  -1 586.881 193.724   2
   3  -6  -1 181.278 433.959   3
  -3   6   1 97.6806 171.762   4
   3   6   0 975.469 429.016   2
   3  -6   0 580.733 576.946   3
   3   6   1 1631.81 574.842   2
   3  -6   1 1027.67 782.862   3
   3   6   2 1737.24 599.408   2
   3  -6   2 1645.33 824.172   3
   3   6   3 2089.80 635.950   2
   3  -6   3 2671.42 1040.16   3
   3   6   4 138.710 230.424   2
   3  -6   4-84.9213 228.274   1
   3  -6   4 89.6587 363.746   3
   3   6   4-570.058 536.830   4
   3  -6   5-75.6569 257.899   1
   3  -6   5 287.493 337.863   3
   3   6   5-193.712 347.406   4
   3  -6   6-292.137 367.833   1
   3  -6   6 991.549 635.041   3
   3   6   6 1234.92 511.585   4
   3  -6   7 234.185 447.080   1
   3  -6   7-49.3487 261.907   3
   3   6   7 595.327 469.764   4
   3  -6   8-323.261 436.648   1
   3  -6   8 871.631 607.664   3
   3   6   8-277.987 351.278   4
   3  -6   9 2145.18 884.027   1
   3  -6   9 865.344 647.926   3
   3   6   9 1999.04 905.620   4
   3  -6  10 2930.94 1024.96   1
   3  -6  10 2530.22 1045.49   3
   3   6  10 2349.70 938.196   4
   3  -6  11 938.149 646.539   1
   3  -6  11 843.931 665.943   3
   3   6  11 1877.80 856.651   4
   3  -6  12 950.176 699.896   1
   3  -6  12 1322.46 782.114   3
   3   6  12 1288.97 644.994   4
   3  -6  13 575.304 470.901   1
   3   6  13-121.536 274.851   4
   3  -6  13 165.320 353.285   3
   3  -6  14 1553.80 779.482   1
   3  -6  14 1460.47 783.004   3
   3   6  14 1465.26 778.404   4
   3  -6  15 1247.05 772.081   1
   3  -6  15 818.719 601.356   3
   3   6  15-422.017 494.910   4
   3  -6  16 248.594 382.217   1
   3   6  16-3.54884 462.508   4
   3  -6  16 418.235 482.487   3
   3  -6  17 2813.81 1094.49   1
   3  -6  17 2096.08 962.963   3
   3   6  17 3802.37 1248.17   4
   3   6  18 979.709 705.967   4
   3   6  19-345.107 498.999   4
  -3   7  18 480.964 455.734   4
  -3   7  17 685.410 590.498   4
  -3   7  16-826.509 537.066   4
  -3   7  15 87.7737 194.872   4
  -3  -7  13-37.7910 219.680   3
  -3  -7  12 376.331 361.811   3
   3   7  -1 741.778 564.091   4
   3   7   0 160.801 374.064   4
   3   7   1 152.558 328.265   4
   3   7   2-24.0288 358.746   4
   3   7   3 629.138 561.219   4
   3   7   4 955.990 822.206   4
   3   7   5 1353.48 793.549   4
   3   7   6 352.232 499.007   4
   3   7   7-395.378 518.593   4
   3   7   8-18.3442 272.458   4
   3   7   9-646.123 583.306   4
   3   7  10 1917.13 931.887   4
   3   7  11 1230.46 790.330   4
  -4   0  37-1718.06 1022.39   5
  -4   0  36 1462.07 883.551   5
  -4   0  35-450.371 500.870   5
  -4   0  34 1800.34 963.581   5
  -4   0  33-172.996 356.259   5
  -4   0  32 2528.15 1113.13   5
  -4   0  31-605.321 529.545   5
  -4   0  30-377.647 398.532   5
  -4   0  29-296.141 369.149   5
  -4   0  28 20409.9 2830.29   5
   4   0 -28 20451.1 1561.01   1
  -4   0  27 373.147 460.508   5
   4   0 -27 3.06875 87.6403   1
  -4   0  26 557.993 469.026   5
   4   0 -26 394.000 228.032   1
  -4   0  25 1588.88 760.233   5
   4   0 -25 277.803 197.173   1
  -4   0  24 26629.6 2978.21   5
   4   0 -24 19216.1 1525.79   1
  -4   0  23 997.706 1011.23   5
   4   0 -23-337.242 219.737   1
  -4   0  22 11096.3 1844.10   5
   4   0 -22 9233.25 1036.11   1
  -4   0  21 22.7138 91.3591   3
   4   0 -21 100.561 115.331   1
  -4   0  21-364.691 416.121   5
   4   0 -20 5144.17 754.573   1
  -4   0  20 5242.84 1188.80   5
  -4   0  20 5900.27 770.624   3
   4   0 -20 5543.72 1060.45   4
  -4   0  19 3.99887 76.8604   3
   4   0 -19-23.2160 96.9089   1
   4   0 -19-211.874 225.318   4
  -4   0  18 2303.95 442.595   3
  -4   0  18 2870.66 869.790   5
   4   0 -18 2814.41 700.275   4
  -4   0  17-81.9989 168.463   3
   4   0 -17 326.608 297.265   5
  -4   0  17-38.1190 344.293   5
   4   0 -17-24.9110 144.098   4
  -4   0  16 48386.8 3429.06   5
   4   0 -16 50076.7 3197.95   5
  -4   0  16 44476.1 1839.05   3
   4   0 -16 47165.1 2724.55   4
  -4   0  15 51.3060 95.4292   3
   4   0 -15-69.4413 166.897   5
   4   0 -15-62.9614 206.219   4
   4   0 -14 89262.4 4088.11   5
   4   0 -14 88586.0 3492.36   4
  -4   0  14 82223.8 2302.19   3
  -4   0  13 40.6113 87.4513   3
   4   0 -13-752.256 403.105   5
   4   0 -12 76285.6 3636.76   5
  -4   0  12 74040.2 1993.58   3
   4   0 -11 118.146 170.851   5
   4   0 -10 55965.6 3020.99   5
  -4   0  10 58561.5 3345.00   5
  -4   0   9-124.696 345.167   5
   4   0  -9-356.390 284.341   5
  -4   0   8 80328.3 3755.66   5
   4   0  -8 72066.4 3367.60   5
   4   0  -8 74245.6 1632.07   3
   4   0  -7-17.0806 110.515   3
   4   0  -7-239.544 247.445   5
   4   0  -6 51535.4 2805.85   5
  -4   0   6 51753.8 2883.93   5
   4   0  -6 50583.7 1427.84   3
  -4   0   5-282.834 297.868   5
   4   0  -5 5.04282 213.401   5
   4   0  -4 19621.2 1440.80   2
   4   0  -4 17792.2 1638.93   5
  -4   0   4 17877.0 1662.74   5
   4   0  -3-11.0084 247.730   2
  -4   0   3 226.965 231.152   5
   4   0  -3-153.276 238.310   5
   4   0  -2 7052.65 846.956   2
   4   0  -2 7681.97 1056.88   5
  -4   0   2 6807.15 1000.51   5
   4   0  -1-13.0533 178.690   2
  -4   0   1-26.8680 157.450   2
  -4   0   1-1.11881 245.652   5
   4   0   0 7613.55 937.623   2
  -4   0   0 6553.98 825.183   2
   4   0   0 6698.26 1014.82   5
   4   0   1-280.457 238.357   2
  -4   0  -1 30.4210 147.281   2
   4   0   1-143.524 191.649   5
  -4   0  -2 19521.7 1416.70   2
   4   0   2 19576.1 1416.32   2
   4   0   2 16998.5 1531.13   5
  -4   0  -3-226.837 186.143   2
   4   0   3-55.9478 237.079   2
   4   0   3 65.3259 156.312   5
  -4   0  -4 23092.6 1590.61   2
   4   0   4 22138.0 1554.29   2
   4   0   5 24.4880 171.393   2
  -4   0  -5 24.1546 128.269   2
   4   0   6 2102.78 523.014   2
  -4   0  -6 1873.02 490.501   2
   4   0   7 142.341 248.757   2
  -4   0  -7-442.241 273.496   2
   4   0   8 64433.9 2903.51   2
  -4   0  -8 63012.6 2899.30   2
   4   0   9-708.902 356.705   2
  -4   0  -9 4.81380 182.659   2
   4   0  10 3293.10 733.769   2
  -4   0 -10 4237.90 799.813   2
   4   0  11-171.675 291.514   2
  -4   0 -11-535.061 310.718   2
   4   0  11 36.2517 165.965   4
  -4   0 -12 17306.3 1676.99   2
   4   0  12 13558.3 1526.28   2
   4   0  12 16699.3 1437.74   4
  -4   0 -13-96.7283 186.922   2
   4   0  13-223.805 283.234   2
   4   0  13-37.3026 214.669   4
   4   0  14 10250.7 1349.83   2
  -4   0 -14 9169.66 1293.76   2
   4   0  14 10228.3 1166.81   4
  -4   0 -15-276.275 264.636   2
   4   0  15 203.307 242.701   4
  -4   0 -16 518.456 351.244   2
   4   0  16 407.345 288.654   2
   4   0  16 619.774 339.965   4
  -4   0 -17 316.250 278.215   2
   4   0  17-239.038 253.075   4
  -4   0 -18 526.029 355.145   2
   4   0  18 442.449 320.583   4
  -4   0 -19 207.063 249.618   2
   4   0  19-12.5271 258.668   4
   4   0  20 31215.0 2327.00   4
   4   0  21 439.690 307.810   1
   4   0  21 381.030 374.364   4
   4   0  22 20831.5 1934.24   1
   4   0  22 23184.6 2068.60   4
   4   0  23-400.944 308.391   1
   4   0  23 460.444 327.255   4
   4   0  24 3605.01 868.911   1
   4   0  24 3556.21 864.453   4
   4   0  25 328.721 284.868   1
   4   0  25 225.485 290.981   4
   4   0  26 815.930 456.678   1
   4   0  26 534.073 389.225   4
   4   0  27 131.407 225.865   1
   4   0  27 253.623 286.448   4
   4   0  28-111.780 241.685   1
   4   0  28 279.769 295.804   4
   4   0  29 24.5094 125.660   1
   4   0  29 482.992 376.920   4
   4   0  30 5360.64 1106.16   1
   4   0  30 5014.29 1118.76   4
   4   0  31-459.427 362.337   1
   4   0  31 351.075 359.468   4
   4   0  32-299.778 263.042   1
   4   0  32-278.438 307.652   4
   4   0  33-6.27286 263.495   1
   4   0  33 493.081 401.344   4
   4   0  34 626.480 420.138   1
   4   0  34 1227.22 612.848   4
   4   0  35-161.654 286.927   4
   4   0  36 34.9236 102.134   4
   4   0  37-469.019 373.862   4
   4   0  38 1864.24 780.237   4
  -4   1  38 735.684 685.818   5
  -4   1  37 178.744 350.681   5
  -4  -1  37-1619.17 1003.10   5
  -4   1  36 171.826 412.539   5
  -4  -1  36 640.662 631.377   5
  -4   1  35-602.288 564.107   5
  -4  -1  35 1436.74 935.411   5
  -4   1  34 5684.05 1682.91   5
  -4  -1  34 4985.05 1643.22   5
  -4   1  33 349.789 424.598   5
  -4  -1  33 646.283 643.788   5
  -4   1  32 2279.77 1021.93   5
  -4  -1  32 748.120 661.712   5
  -4   1  31 657.893 571.445   5
  -4  -1  31 279.059 468.913   5
  -4   1  30 4454.72 1343.79   5
  -4  -1  30 4474.58 1474.68   5
  -4   1  29 4770.05 1033.09   3
   4   1 -29 4518.05 916.954   1
  -4   1  29 5469.00 1471.54   5
  -4  -1  29 4667.10 1412.48   5
   4   1 -28 11683.7 1486.61   1
  -4   1  28 12369.4 2169.43   5
  -4  -1  28 11460.6 2205.37   5
  -4   1  28 11323.5 1529.56   3
  -4   1  27-115.653 213.464   3
   4   1 -27 221.471 207.083   1
  -4   1  27 1207.22 679.889   5
  -4  -1  27 443.023 635.187   5
   4   1 -26 10825.7 1420.33   1
  -4   1  26 9762.84 1832.70   5
  -4  -1  26 10801.6 2073.92   5
  -4   1  26 10045.3 1394.11   3
  -4   1  25 617.968 368.427   3
   4   1 -25 275.615 249.493   1
   4  -1 -25 311.378 115.934   1
  -4   1  25 747.800 551.382   5
  -4  -1  25 1504.43 762.648   5
   4   1 -24 5430.50 984.108   1
   4  -1 -24 6001.32 509.184   1
  -4   1  24 7351.31 1510.13   5
  -4  -1  24 5882.08 1533.32   5
  -4   1  24 6154.51 1048.38   3
  -4   1  23 2477.86 645.493   3
   4   1 -23 2448.19 648.061   1
   4  -1 -23 2159.10 327.941   1
  -4  -1  23 3148.41 1091.52   5
  -4   1  23 2655.96 905.231   5
   4  -1 -22 7125.87 621.538   1
   4   1 -22 6713.40 1090.19   1
  -4  -1  22 5985.82 1483.83   5
  -4   1  22 6700.87 1383.19   5
  -4   1  22 6340.20 1024.80   3
  -4   1  21 577.474 318.614   3
   4   1 -21-113.267 171.369   1
   4  -1 -21 490.672 168.628   1
  -4  -1  21 1065.49 692.098   5
  -4   1  21 1228.30 601.108   5
   4  -1 -20 8377.41 704.221   1
   4   1 -20 8258.36 1146.73   1
   4   1 -20 10626.6 1677.77   5
  -4  -1  20 9469.66 1720.29   5
  -4   1  20 8139.87 1450.04   5
  -4   1  20 8443.37 1127.44   3
   4  -1 -20 8806.74 1373.35   4
   4   1 -20 8913.24 1286.50   4
  -4   1  19 1732.84 503.954   3
   4   1 -19 1363.24 459.733   1
   4  -1 -19 1398.36 296.314   1
  -4  -1  19 1339.18 681.866   5
   4   1 -19 2242.94 759.844   5
  -4   1  19 2455.12 791.211   5
   4  -1 -19 1669.62 579.743   4
   4   1 -19 2177.79 642.332   4
   4   1 -18 24614.2 1902.42   1
  -4   1  18 27829.5 2589.54   5
   4   1 -18 26012.8 2567.45   5
   4  -1 -18 25686.1 2225.19   4
  -4   1  18 25945.0 1870.21   3
  -4   1  17 98.9862 135.709   3
   4   1 -17 485.836 286.345   1
   4   1 -17 194.431 286.108   5
  -4   1  17 82.2383 330.682   5
   4  -1 -17-151.597 178.960   4
   4   1 -16 17777.1 2047.94   5
   4  -1 -16 19503.4 1832.45   4
  -4   1  16 17619.2 1474.88   3
   4   1 -15 8438.62 1369.29   5
   4  -1 -15 8681.23 1193.53   4
  -4   1  15 7226.67 934.442   3
  -4   1  14 97.7872 137.840   3
   4   1 -14 331.807 306.881   5
   4  -1 -14 643.347 307.929   4
   4   1 -13 10587.4 1499.66   5
   4  -1 -13 11701.6 1361.58   5
   4  -1 -13 12110.9 1325.51   4
  -4   1  13 10866.7 1093.42   3
  -4   1  12 497.209 315.889   5
   4  -1 -12-117.171 172.234   5
   4   1 -12 375.395 331.207   5
   4  -1 -12 503.511 286.986   4
  -4   1  12 95.9863 143.976   3
  -4   1  11 738.935 318.772   5
   4  -1 -11 752.190 354.162   5
   4   1 -11 638.234 400.217   5
  -4   1  11 199.022 164.104   3
   4  -1 -11 797.878 344.206   4
   4   1 -10 42986.4 2936.05   5
  -4   1  10 41611.9 2604.85   5
   4  -1 -10 43720.9 2396.56   5
   4  -1 -10 43170.1 1963.28   3
   4  -1 -10 44494.8 2272.20   4
   4  -1  -9 20162.9 1595.16   5
   4   1  -9 20774.9 2009.52   5
  -4   1   9 21027.2 1818.36   5
   4  -1  -9 20490.7 1355.01   3
   4  -1  -9 23325.2 1577.08   4
   4  -1  -8 6837.83 916.669   5
   4   1  -8 6639.89 1139.43   5
  -4   1   8 6019.50 959.791   5
   4  -1  -8 6220.27 804.721   4
   4  -1  -8 5928.47 738.628   3
   4  -1  -7 381.928 235.765   3
   4   1  -7 406.355 331.326   5
  -4   1   7 243.932 284.375   5
   4  -1  -7 145.182 219.209   5
   4  -1  -7 34.2540 113.393   4
   4  -1  -6 8113.14 956.939   5
  -4   1   6 7748.79 1006.08   5
   4   1  -6 8326.71 1271.61   5
   4  -1  -6 8504.08 848.096   4
   4  -1  -6 8068.55 849.400   3
   4   1  -5 22.3887 47.8676   3
   4   1  -5 52.4242 249.008   5
   4  -1  -5-42.5454 134.283   5
   4  -1  -5 123.463 157.450   3
   4  -1  -4-5.45540 168.626   2
   4  -1  -4 80.7859 136.453   5
  -4   1   4 135.259 262.061   5
   4   1  -4-72.4812 310.823   5
   4  -1  -3 363.490 227.256   2
   4   1  -3 382.032 368.300   5
   4  -1  -3 191.763 167.680   5
  -4   1   3 394.737 249.878   5
  -4  -1   2 4205.12 690.166   2
   4  -1  -2 3304.64 549.451   2
   4  -1  -2 4008.85 684.578   5
   4   1  -2 4459.25 929.184   5
  -4   1   2 3606.18 603.096   5
  -4  -1   1 28388.7 1801.56   2
   4  -1  -1 28646.2 1554.87   2
   4   1  -1 27038.5 2243.52   5
   4  -1  -1 29244.5 1779.19   5
  -4   1   0 61530.8 2290.42   2
  -4  -1   0 60633.9 2640.75   2
   4  -1   0 60955.9 2249.95   2
   4  -1   0 56336.3 2472.83   5
   4   1   0 56566.8 3217.08   5
  -4   1  -1 10480.8 948.857   2
   4  -1   1 11147.7 960.591   2
  -4  -1  -1 10370.6 1099.42   2
   4  -1   1 10629.0 1068.74   5
   4   1   1 9755.60 1336.40   5
  -4  -1  -2 132099. 3959.70   2
   4  -1   2 135344. 3383.49   2
  -4   1  -2 129725. 3356.88   2
   4   1   2 128229. 4762.38   5
   4  -1   2 128065. 3662.80   5
  -4  -1  -3 22022.9 1648.55   2
  -4   1  -3 23088.4 1428.28   2
   4  -1   3 23311.1 1446.29   2
   4   1   3 21635.1 1952.70   5
  -4   1  -4 11582.2 1030.49   2
   4  -1   4 10552.4 984.390   2
  -4  -1  -4 12311.0 1253.90   2
  -4   1  -5 9092.00 941.851   2
  -4  -1  -5 10260.3 1175.82   2
   4  -1   5 9015.34 935.650   2
   4  -1   6 13544.9 1184.61   2
  -4   1  -6 13644.8 1180.54   2
  -4  -1  -6 14241.9 1401.30   2
   4  -1   7 2192.21 468.392   2
  -4  -1  -7 3001.85 669.715   2
  -4   1  -7 3159.33 594.955   2
   4  -1   8 39643.7 2111.16   2
  -4   1  -8 40441.0 2148.46   2
  -4  -1  -8 38331.5 2427.42   2
   4  -1   8 38327.6 1528.10   4
   4  -1   9 705.426 347.317   2
  -4  -1  -9 866.010 407.700   2
  -4   1  -9 710.893 288.556   2
   4  -1   9 538.295 194.731   4
   4  -1  10 61812.9 2858.99   2
  -4   1 -10 64328.6 2895.69   2
  -4  -1 -10 64589.9 3301.91   2
   4  -1  10 59879.1 2036.92   4
   4  -1  11 29280.5 1999.57   2
  -4  -1 -11 30777.0 2321.20   2
  -4   1 -11 31411.9 2076.96   2
   4  -1  11 29117.6 1467.37   4
  -4   1 -12 942.819 403.806   2
   4  -1  12 464.021 297.339   2
  -4  -1 -12 1094.74 459.142   2
   4   1  12 883.701 382.664   4
   4  -1  12 620.232 215.853   4
  -4  -1 -13 2894.65 760.969   2
   4  -1  13 2666.15 601.657   2
  -4   1 -13 3549.19 737.969   2
   4  -1  13 2906.92 493.562   4
   4   1  13 3656.08 797.572   4
   4  -1  14 8014.90 1128.49   1
  -4  -1 -14 7322.82 1210.03   2
  -4   1 -14 7044.81 1067.72   2
   4  -1  14 6528.46 771.295   4
   4   1  14 6622.34 1054.10   4
  -4   1 -15 2907.63 715.394   2
  -4  -1 -15 2781.12 772.993   2
   4  -1  15 2688.01 703.184   1
   4  -1  15 2638.03 521.520   4
   4   1  15 2919.07 734.813   4
  -4  -1 -16-354.399 306.768   2
  -4   1 -16 28.0821 298.348   2
   4   1  16 22.8498 239.522   2
   4  -1  16-403.298 308.165   1
   4  -1  16-61.9478 117.892   4
   4   1  16 165.586 213.800   4
  -4   1 -17 4392.91 932.326   2
  -4  -1 -17 3858.28 956.068   2
   4  -1  17 3367.89 799.934   1
   4   1  17 3349.92 900.618   2
   4  -1  17 3925.56 669.511   4
   4   1  17 4083.98 890.316   4
  -4   1 -18 3322.01 836.146   2
   4  -1  18 2651.38 723.033   1
   4  -1  18 3126.26 608.570   4
   4   1  18 3251.98 796.508   4
   4  -1  19 3536.40 846.364   1
  -4   1 -19 3942.37 906.845   2
   4  -1  19 2889.10 589.745   4
   4   1  19 3116.00 803.371   4
   4  -1  20 11305.7 1493.89   1
  -4   1 -20 12375.3 1679.31   2
   4   1  20 12621.8 1640.17   4
   4  -1  20 10703.7 1168.23   4
  -4   1 -21 1557.08 614.819   2
   4  -1  21 2134.95 686.013   1
   4  -1  21 1729.01 516.847   4
   4   1  21 2109.87 683.634   4
   4  -1  22 1981.02 675.024   1
   4   1  22 2805.17 813.177   4
   4  -1  22 2320.81 573.525   4
   4  -1  23 547.731 387.170   1
   4  -1  23 409.985 270.086   4
   4   1  23 195.986 309.640   4
   4  -1  24-634.905 419.747   1
   4   1  24-392.764 375.882   4
   4  -1  24-338.226 265.089   4
   4  -1  25 158.283 259.829   1
   4   1  25 274.859 247.661   1
   4   1  25 191.332 311.697   4
   4  -1  25-93.5759 169.903   4
   4   1  26-236.883 221.339   1
   4  -1  26 666.833 429.747   1
   4  -1  26 318.307 321.310   4
   4   1  26 572.966 438.052   4
   4   1  27 291.934 302.799   1
   4  -1  27 328.074 332.858   1
   4  -1  27-361.038 284.103   4
   4   1  27 69.0104 288.027   4
   4   1  28 2790.65 702.140   1
   4  -1  28 3229.58 920.089   1
   4  -1  28 2995.94 756.650   4
   4   1  28 2456.44 832.038   4
   4   1  29 1553.07 549.030   1
   4  -1  29 793.985 505.117   1
   4  -1  29 1206.57 489.038   4
   4   1  29 1843.92 737.093   4
   4  -1  30 466.195 393.607   1
   4   1  30-102.541 199.366   1
   4  -1  30 1.68092 208.236   4
   4   1  30 17.0798 313.080   4
   4  -1  31-155.838 320.313   1
   4   1  31-90.1997 190.390   1
   4   1  31-140.786 257.055   4
   4   1  32 541.944 356.683   1
   4  -1  32 900.777 602.306   1
   4   1  32 1282.53 661.501   4
   4  -1  33 224.003 341.366   1
   4   1  33 757.908 549.188   4
   4  -1  34 2636.59 930.403   1
   4   1  34 1815.20 859.697   4
   4  -1  35 20.8305 189.047   1
   4   1  35 878.294 581.075   4
   4  -1  36-156.080 275.225   1
   4  -1  36-90.9984 343.342   5
   4   1  36 181.143 362.368   4
   4   1  37 288.562 381.273   4
   4   1  38 458.915 447.426   4
  -4   2  37 1028.71 770.509   5
  -4  -2  36 2295.87 1253.89   5
  -4   2  36 1795.10 1013.59   5
  -4   2  35-992.891 708.513   5
  -4  -2  35 2897.36 1296.54   5
  -4  -2  34-166.522 487.509   5
  -4   2  34-159.507 295.369   5
  -4  -2  33-864.977 712.431   5
  -4   2  33 300.920 378.428   5
  -4  -2  32 41.2195 360.968   5
  -4   2  32-513.221 472.718   5
  -4   2  31-609.908 504.852   5
  -4  -2  31 1073.83 802.937   5
  -4  -2  30 336.816 482.574   5
  -4   2  30 1061.09 665.147   5
  -4  -2  29-855.529 721.578   5
  -4   2  29-419.025 459.535   5
  -4  -2  28-940.260 738.954   5
  -4   2  28-462.996 404.058   5
  -4  -2  27 1745.12 934.462   5
  -4   2  27 615.301 495.181   5
  -4  -2  26 1835.58 930.327   5
  -4   2  26 2408.01 907.992   5
  -4  -2  25 660.781 483.649   5
  -4   2  25 946.018 575.016   5
  -4   2  24 1131.71 541.870   3
  -4  -2  24 615.799 569.835   5
  -4   2  24 1512.97 685.844   5
   4   2 -24 1189.78 538.609   1
  -4   2  23 2202.05 748.337   3
  -4   2  23 2241.54 812.740   5
  -4  -2  23 2496.42 922.564   5
   4   2 -23 2251.36 751.132   1
  -4   2  22 303.036 255.458   3
  -4   2  22 100.370 233.336   5
   4   2 -22-242.074 239.998   1
  -4   2  21 2715.75 738.802   3
   4   2 -21 4266.91 974.805   1
  -4  -2  21 3828.48 1238.68   5
  -4   2  21 3688.07 987.667   5
   4   2 -20 8421.50 1353.56   1
  -4  -2  20 8104.45 1730.59   5
  -4   2  20 7897.11 1410.01   5
  -4   2  20 6885.69 1194.38   3
  -4   2  19 3278.28 787.115   3
   4   2 -19 4507.97 1002.35   1
  -4  -2  19 3976.18 1250.49   5
  -4   2  19 3544.04 952.058   5
   4   2 -18 7430.88 1235.78   1
   4  -2 -18 7959.28 432.750   1
  -4  -2  18 9109.46 1800.06   5
   4   2 -18 8277.35 1540.75   5
  -4   2  18 6967.17 1277.78   5
   4  -2 -18 8435.67 1359.65   4
  -4   2  18 6636.60 1127.92   3
  -4   2  17 2521.36 675.222   3
   4   2 -17 3315.50 818.799   1
   4  -2 -17 2409.27 299.109   1
  -4  -2  17 3066.36 1052.83   5
   4   2 -17 1381.38 620.003   5
   4  -2 -17 2336.41 691.105   4
  -4   2  16 370.157 321.998   3
   4   2 -16 650.819 366.771   1
   4  -2 -16 334.703 129.805   1
  -4  -2  16 112.398 341.275   5
   4   2 -16 346.427 346.866   5
   4  -2 -16 465.255 380.160   4
   4   2 -15 4721.12 943.877   1
   4  -2 -15 3682.33 447.078   1
  -4  -2  15 2898.95 984.027   5
   4   2 -15 4817.84 1105.73   5
  -4   2  15 3249.43 755.136   3
   4  -2 -15 3789.58 836.950   4
   4  -2 -14 5897.54 599.520   1
  -4  -2  14 4371.69 1132.00   5
   4   2 -14 6179.34 1257.50   5
   4  -2 -14 4996.41 937.450   4
  -4   2  14 4816.81 885.778   3
  -4  -2  14 5064.73 490.531   3
   4  -2 -13 15638.1 1005.31   1
   4   2 -13 15236.6 1949.48   5
  -4   2  13 14464.1 1549.10   5
  -4  -2  13 15022.8 2090.79   5
   4  -2 -13 15995.8 1622.45   4
  -4   2  13 15612.1 1598.69   3
  -4  -2  13 15921.0 834.870   3
   4  -2 -12 4367.14 783.674   3
   4  -2 -12 4699.60 587.107   1
   4   2 -12 4447.82 1055.70   5
  -4   2  12 4490.48 859.007   5
   4  -2 -12 4407.50 839.654   4
  -4   2  12 4226.36 823.222   3
  -4  -2  12 3917.18 399.860   3
  -4   2  11 8684.34 1149.25   5
   4   2 -11 9719.52 1540.47   5
  -4  -2  11 9112.52 590.545   3
   4  -2 -11 10348.5 1227.16   4
   4  -2 -11 8624.33 1089.00   3
  -4   2  10 30189.7 2046.15   5
   4   2 -10 32999.0 2819.11   5
   4  -2 -10 31073.3 2031.46   4
   4  -2 -10 30652.5 2071.18   3
   4  -2  -9 187.605 203.316   3
   4   2  -9 65.5631 200.291   5
  -4   2   9 526.436 289.815   5
   4  -2  -9 663.794 326.027   4
   4   2  -8 24123.6 2384.38   5
  -4   2   8 22372.1 1634.27   5
   4  -2  -8 23168.2 1635.24   4
   4  -2  -8 23504.9 1806.94   3
   4  -2  -7 1252.54 409.506   3
  -4   2   7 859.704 320.976   5
   4   2  -7 1203.99 556.934   5
   4  -2  -7 1612.90 445.366   4
   4  -2  -6 5553.73 863.636   3
   4   2  -6 4997.06 1070.00   5
  -4   2   6 4831.55 693.752   5
   4  -2  -6 6249.43 786.658   4
   4  -2  -5 6977.53 674.786   5
  -4   2   5 6793.71 761.048   5
   4   2  -5 5770.50 1158.42   5
   4  -2  -5 7346.93 815.730   4
   4   2  -5 7057.98 664.695   3
   4  -2  -5 6124.30 916.193   3
   4   2  -4 655.386 202.349   3
   4  -2  -4 799.162 210.324   5
  -4   2   4 532.067 202.382   5
   4   2  -4 797.108 480.489   5
   4  -2  -4 1613.65 491.604   3
  -4  -2   3 114575. 3852.00   2
   4  -2  -3 120196. 3104.42   2
   4  -2  -3 118141. 2502.50   5
   4   2  -3 119136. 5201.30   5
  -4   2   3 118345. 2699.60   5
   4  -2  -3 116968. 2917.93   4
   4   2  -3 115491. 2914.41   3
   4  -2  -2 5003.38 631.932   2
  -4  -2   2 4737.03 779.734   2
   4   2  -2 4998.42 1073.67   5
   4  -2  -2 5437.23 528.793   5
   4   2  -2 5401.45 653.642   3
   4  -2  -2 6490.76 659.090   4
  -4  -2   1 15349.9 1415.12   2
   4  -2  -1 15186.6 1037.23   2
   4  -2  -1 14021.4 858.119   5
   4   2  -1 13324.3 1719.26   5
   4  -2  -1 14155.3 900.458   4
   4   2  -1 14478.1 1104.90   3
  -4  -2   0 59641.0 2804.69   2
   4  -2   0 58465.3 2010.04   2
   4  -2   0 64595.5 2770.07   1
   4  -2   0 57366.5 1797.41   5
   4   2   0 57407.5 3606.14   5
   4  -2   0 58520.8 1691.81   4
   4   2   0 57193.3 2259.92   3
   4  -2   1 109027. 2732.07   2
  -4  -2  -1 111583. 3874.99   2
   4  -2   1 117424. 3831.98   1
   4   2   1 113794. 5051.65   5
   4  -2   1 107598. 2615.73   5
   4  -2   1 108684. 2094.16   4
  -4  -2  -2 45917.4 2514.92   2
   4  -2   2 46744.4 1788.18   2
   4  -2   2 49253.2 2546.04   1
   4  -2   2 46391.6 1812.81   5
   4   2   2 45899.3 3219.65   5
   4  -2   2 44721.1 1182.31   4
  -4  -2  -3 3035.09 648.449   2
  -4   2  -3 2759.84 433.201   2
   4  -2   3 2548.75 411.299   2
   4   2   3 3077.46 831.148   5
   4  -2   3 3062.24 471.425   5
   4  -2   3 3056.59 254.726   4
   4  -2   4 83501.6 2482.77   2
  -4  -2  -4 86773.8 3565.79   2
  -4   2  -4 83284.5 2462.52   2
   4   2   4 86044.4 4396.16   5
  -4  -2  -5 17226.4 1627.74   2
   4  -2   5 18711.0 1222.03   2
  -4   2  -5 18448.2 1194.86   2
   4   2   5 16767.9 1938.69   5
  -4   2  -6 6508.99 738.127   2
  -4  -2  -6 7393.49 1094.17   2
   4  -2   6 6915.57 759.730   2
   4  -2   7 47157.6 2069.87   2
  -4   2  -7 46353.0 2017.79   2
  -4  -2  -7 46113.8 2771.54   2
   4  -2   8 3395.95 597.887   2
  -4   2  -8 3684.66 592.820   2
  -4  -2  -8 4648.87 906.549   2
   4  -2   9 26407.3 1649.17   2
   4   2   9 25016.3 2102.69   2
  -4   2  -9 26319.6 1634.71   2
  -4  -2  -9 27246.7 2236.87   2
   4  -2  10 37811.0 2044.96   2
  -4   2 -10 37858.4 2038.73   2
  -4  -2 -10 40572.2 2771.07   2
   4   2  10 34473.9 2508.37   2
  -4  -2 -11 47672.5 3112.64   2
   4   2  11 43401.3 2906.65   2
  -4   2 -11 45634.2 2334.20   2
   4   2  12 480.149 401.566   2
   4  -2  12 488.488 444.552   1
  -4  -2 -12 803.528 439.203   2
  -4   2 -12 1537.11 450.837   2
   4  -2  13 303.348 349.688   1
   4   2  13 561.823 321.992   2
  -4  -2 -13 247.716 276.888   2
  -4   2 -13 275.096 227.146   2
   4   2  13 432.461 300.075   4
  -4   2 -14 81.2705 135.709   2
   4  -2  14 107.656 233.050   1
   4   2  14-368.511 353.747   2
  -4  -2 -14-60.2725 195.932   2
   4   2  14 370.460 387.273   4
   4  -2  15 9431.87 1451.42   1
  -4  -2 -15 11544.4 1619.69   2
  -4   2 -15 9351.17 1214.34   2
   4   2  15 8107.77 1348.03   2
   4   2  15 11217.2 1573.91   4
  -4   2 -16 694.482 352.467   2
   4  -2  16 256.024 299.673   1
   4   2  16 891.196 473.147   2
   4   2  16 1386.46 621.847   4
   4  -2  17 16933.9 1940.41   1
   4   2  17 16760.7 2009.55   2
  -4   2 -17 16357.3 1699.62   2
   4   2  17 15695.8 1892.12   4
  -4   2 -18 357.841 302.090   2
   4  -2  18-357.429 352.919   1
   4   2  18 314.133 477.275   4
  -4   2 -19 761.769 390.031   2
   4  -2  19 173.390 285.495   1
   4   2  19 622.184 437.824   4
  -4   2 -20 247.432 253.432   2
   4  -2  20 249.017 305.766   1
   4   2  20 354.847 335.603   4
   4  -2  21 9767.62 1583.12   1
  -4   2 -21 10804.6 1559.33   2
   4   2  21 12146.8 1785.48   4
   4  -2  22 17345.0 2123.12   1
  -4   2 -22 19626.3 2149.95   2
   4   2  22 18288.6 2224.76   4
   4  -2  23 12038.1 1793.57   1
   4   2  23 12602.2 1867.05   4
   4  -2  24 1286.66 608.984   1
   4   2  24 1809.45 767.069   4
   4  -2  25-2.41076 195.647   1
   4   2  25-96.1104 263.810   4
   4  -2  26 2704.92 927.211   1
   4   2  26 2676.21 907.820   4
   4  -2  27 3341.61 976.110   1
   4   2  27 3335.44 1086.03   4
   4  -2  28 2714.99 962.252   1
   4   2  28 3342.34 720.457   1
   4  -2  28 4497.06 1253.25   5
   4   2  28 3533.76 1069.75   4
   4  -2  29 75.7911 278.051   1
   4   2  29 51.7993 169.434   1
   4  -2  29 527.101 497.629   5
   4   2  29 1176.53 638.029   4
   4  -2  30 2257.33 876.030   1
   4  -2  30 3431.97 1194.70   5
   4   2  30 2646.27 949.299   4
   4  -2  31 817.168 556.519   1
   4  -2  31 1278.09 835.713   5
   4   2  31 37.3730 329.882   4
   4  -2  32 954.616 620.293   1
   4  -2  32-291.332 413.557   5
   4   2  32 203.475 305.324   4
   4  -2  33-109.219 205.181   1
   4  -2  33-471.813 455.744   5
   4   2  33-403.560 604.785   4
   4  -2  34 247.093 341.434   1
   4  -2  34-11.9223 266.698   5
   4   2  34-406.069 464.648   4
   4  -2  35 1295.02 849.979   1
   4  -2  35 1399.07 840.488   5
   4   2  35 1191.82 754.549   4
   4  -2  36-524.975 521.682   1
   4  -2  36 1094.87 765.790   5
   4  -2  37 760.656 604.755   1
   4  -2  38 697.347 554.344   1
  -4   3  37-162.120 366.841   5
  -4   3  36-71.2518 267.195   5
  -4   3  35 2744.49 1153.18   5
  -4  -3  34-246.170 589.316   5
  -4   3  34 920.268 679.730   5
  -4  -3  33 3366.69 1475.55   5
  -4   3  33 5302.11 1570.37   5
  -4  -3  32-145.870 289.366   5
  -4   3  32 921.725 690.129   5
  -4  -3  31 87.6161 317.511   5
  -4   3  31 989.162 633.534   5
  -4  -3  30 1328.24 925.561   5
  -4   3  30 771.953 574.788   5
  -4  -3  29 155.239 327.707   5
  -4   3  29 412.650 406.934   5
  -4  -3  28 3750.57 1394.30   5
  -4   3  28 4212.07 1273.56   5
  -4  -3  27 4754.28 1627.49   5
  -4   3  27 5359.09 1352.05   5
  -4  -3  26 4542.79 1350.61   5
  -4   3  26 1960.44 807.814   5
  -4   3  25 693.899 499.613   5
  -4  -3  25 992.580 782.133   5
  -4   3  25 764.925 465.404   4
  -4   3  24 11726.2 1862.67   5
  -4  -3  24 12976.2 2462.02   5
  -4   3  24 11117.1 1707.24   4
  -4  -3  23 9005.42 2050.44   5
  -4   3  23 8649.53 1570.01   5
  -4   3  23 10022.9 1560.97   4
  -4  -3  22-444.749 532.894   5
  -4   3  22 2.28495 384.684   5
  -4   3  22 452.669 429.049   4
  -4   3  21 2252.03 756.138   5
  -4  -3  21 2337.69 1055.79   5
  -4   3  21 2069.26 719.681   4
  -4   3  20 1229.74 602.295   5
  -4  -3  20-55.1246 590.662   5
  -4   3  20 632.295 467.283   4
  -4   3  19 4561.85 1022.34   5
  -4  -3  19 3185.06 1199.64   5
  -4   3  19 3709.90 955.660   4
  -4  -3  19 3184.41 599.133   3
  -4  -3  18 59870.7 4761.10   5
  -4   3  18 52841.1 3373.92   5
  -4   3  18 60314.3 3459.00   4
  -4  -3  18 54856.4 2378.24   3
  -4  -3  17 2442.83 1045.48   5
  -4   3  17 3426.71 872.044   4
  -4  -3  17 2415.50 505.637   3
  -4  -3  16 122.239 153.554   3
   4  -3 -16 483.561 197.794   1
  -4  -3  16 450.177 377.877   5
  -4   3  16 820.792 500.024   4
  -4   3  16 789.918 407.788   3
   4  -3 -16 535.495 397.806   4
   4  -3 -15 17990.2 1161.78   1
   4   3 -15 17478.7 2255.83   5
  -4  -3  15 17317.7 2488.58   5
   4  -3 -15 18357.0 1987.95   4
  -4   3  15 18133.0 1768.35   4
  -4   3  15 17070.0 1992.21   3
  -4  -3  15 17904.6 1310.45   3
   4   3 -14 2335.07 700.286   2
  -4  -3  14 2059.71 460.395   3
   4  -3 -14 2863.23 500.607   1
   4   3 -14 3335.03 970.376   5
  -4   3  14 3252.01 743.976   5
  -4  -3  14 1741.73 843.670   5
  -4   3  14 2959.81 740.652   4
  -4   3  14 2364.86 725.276   3
   4  -3 -14 3525.35 864.787   4
   4   3 -13 6896.63 1142.03   2
   4  -3 -13 6092.29 1113.57   3
   4  -3 -13 6943.98 807.680   1
   4   3 -13 6858.26 1273.44   1
  -4   3  13 7144.97 1049.36   5
  -4  -3  13 7282.60 1527.61   5
   4   3 -13 5634.34 1263.96   5
   4  -3 -13 6155.67 1095.73   4
  -4   3  13 7222.77 1094.38   4
  -4  -3  13 5875.21 739.371   3
   4  -3 -12 859.355 489.450   3
  -4  -3  12 925.560 304.322   3
   4   3 -12 1104.08 489.040   2
   4  -3 -12 1117.52 385.400   1
   4   3 -12 1918.36 650.889   1
  -4  -3  12 2261.20 878.809   5
  -4   3  12 1182.94 422.790   5
   4   3 -12 409.223 238.231   5
  -4   3  12 1980.01 572.554   4
   4  -3 -12 1354.95 494.355   4
   4   3 -11 27199.1 2152.01   2
   4   3 -11 28847.7 2514.89   1
   4  -3 -11 27766.8 1752.72   1
  -4  -3  11 29224.3 3014.83   5
  -4   3  11 27803.1 1888.34   5
   4   3 -11 29966.5 2899.17   5
   4  -3 -11 29173.1 2237.52   4
  -4  -3  11 28263.3 1600.69   3
   4  -3 -11 29299.6 2387.48   3
  -4   3  11 26803.8 1974.80   4
  -4  -3  10 158.119 159.603   3
   4  -3 -10 552.768 331.042   3
   4  -3 -10 181.129 178.468   1
   4   3 -10 184.001 343.089   5
  -4  -3  10-155.152 412.081   5
  -4   3  10 269.909 254.486   5
   4  -3 -10 270.612 236.247   4
  -4  -3   9 566.015 246.586   3
   4  -3  -9 797.867 475.772   3
   4  -3  -9 1202.90 415.564   1
   4   3  -9 493.835 391.138   5
  -4   3   9 601.781 266.494   5
  -4  -3   9-494.537 469.446   5
   4  -3  -9 674.714 334.669   4
   4  -3  -8 1.62262 206.286   3
   4  -3  -8-50.1304 156.771   1
   4   3  -8-106.965 389.449   5
  -4   3   8 58.4596 119.206   5
  -4  -3   8 31.4522 303.744   5
   4  -3  -8-141.335 159.411   4
   4  -3  -7 15874.5 1448.80   1
   4   3  -7 16477.6 2145.53   5
  -4   3   7 14934.8 1020.31   5
  -4  -3   7 15272.9 2081.86   5
   4  -3  -7 15430.5 1428.27   4
  -4   3   7 16207.4 1325.12   4
   4  -3  -7 14528.1 1672.60   3
   4  -3  -6 263.826 248.192   3
   4  -3  -6 481.988 263.324   1
  -4  -3   6-330.680 439.531   5
  -4   3   6 323.320 147.740   5
  -4   3   6 475.957 235.285   4
   4  -3  -6 487.809 256.601   4
   4  -3  -5 1892.17 618.429   3
   4  -3  -5 3420.99 703.604   1
  -4  -3   5 2531.17 859.322   5
   4   3  -5 3449.19 1036.31   5
  -4   3   5 2825.88 523.835   4
   4  -3  -5 2894.24 576.438   4
   4  -3  -4 892.949 254.348   2
   4  -3  -4 858.348 452.703   3
   4  -3  -4 861.664 370.824   1
   4   3  -4-32.3237 211.673   5
  -4  -3   4 80.3462 344.252   5
  -4   3   4 702.121 267.598   4
   4  -3  -4 955.789 328.662   4
   4   3  -4 622.049 284.590   3
   4  -3  -3 14355.4 964.433   2
   4  -3  -3 15360.6 1506.97   1
   4   3  -3 17828.1 2226.19   5
  -4  -3   3 18276.7 2154.83   5
   4  -3  -3 16007.2 1242.27   4
   4   3  -3 15112.9 1360.31   3
   4  -3  -3 16292.1 1811.68   3
   4  -3  -2 2803.91 409.086   2
  -4  -3   2 3069.50 687.372   2
   4   3  -2 1914.87 510.932   3
   4  -3  -2 3074.46 716.168   1
   4   3  -2 2659.60 887.168   5
   4  -3  -2 2275.33 715.209   3
   4  -3  -2 2900.52 510.233   4
   4   3  -1 2131.02 543.129   3
  -4  -3   1 1586.86 489.604   2
   4  -3  -1 1901.44 308.006   2
   4   3  -1 1309.67 507.425   5
   4  -3  -1 1512.89 509.385   1
  -4  -3   0 3768.43 755.292   2
   4  -3   0 3980.26 429.458   2
   4   3   0 2976.71 658.482   3
   4   3   0 3394.06 965.184   5
   4  -3   0 3657.99 783.297   1
   4   3   1 297.884 245.495   3
  -4  -3  -1 116.395 196.611   2
   4  -3   1 22.8663 64.7045   2
   4  -3   1 625.080 410.567   1
   4   3   1 21.3974 362.885   5
   4  -3   2 9006.84 591.094   2
  -4  -3  -2 9323.52 1218.59   2
   4  -3   2 9928.68 1354.06   1
   4   3   2 9686.41 1657.40   5
   4   3   2 8702.73 1146.31   3
  -4  -3  -3 54514.1 2989.48   2
   4  -3   3 55296.4 1472.55   2
   4  -3   3 56563.1 3190.43   1
   4   3   3 56512.1 4039.02   5
   4   3   3 55086.9 2936.84   3
  -4  -3  -4 24932.9 2043.91   2
   4  -3   4 26014.7 1016.71   2
   4  -3   4 24119.6 2099.48   1
   4   3   4 24178.4 2655.96   5
   4   3   4 26358.5 2067.39   3
  -4  -3  -5 1162.11 437.144   2
   4   3   5 1488.55 512.922   3
   4   3   5 363.461 360.498   2
   4  -3   5 1807.13 639.279   1
   4   3   5 870.245 451.177   5
   4  -3   5 1272.66 240.304   5
   4   3   6 11257.3 1424.65   2
  -4  -3  -6 10759.5 1399.55   2
   4  -3   6 11397.8 1510.22   1
   4  -3   6 12265.3 849.586   5
   4   3   6 12477.4 1893.18   5
   4   3   6 10815.9 1365.65   3
  -4  -3  -7 629.696 376.508   2
   4   3   7 1141.19 459.185   3
  -4   3  -7 628.285 185.463   2
   4   3   7 32.9036 308.653   2
   4  -3   7 872.073 486.710   1
   4  -3   7 1045.46 298.407   5
   4   3   7 1241.63 657.170   5
  -4   3  -8 25011.4 1263.60   2
   4   3   8 23066.1 2093.48   2
  -4  -3  -8 25590.2 2244.89   2
   4  -3   8 24171.5 2238.47   1
   4  -3   8 23529.8 1416.63   5
   4   3   8 25993.3 2788.18   5
   4   3   8 24215.2 2096.09   3
  -4   3  -9 144.009 92.8911   2
  -4  -3  -9-126.651 295.196   2
   4  -3   9-336.823 201.367   5
   4   3   9-485.183 363.747   2
   4  -3   9-250.561 288.695   1
  -4   3 -10 882.432 282.682   2
  -4  -3 -10 1021.82 475.865   2
   4  -3  10 1263.53 423.015   5
   4   3  10 1243.00 537.280   2
   4  -3  10 923.986 499.555   1
  -4   3 -11 1200.53 327.020   2
  -4  -3 -11 1227.21 541.093   2
   4   3  11 668.741 382.238   2
   4  -3  11 1241.16 576.119   1
   4  -3  11 848.005 334.789   5
  -4  -3 -12 462.153 277.564   2
  -4   3 -12 198.007 128.781   2
   4   3  12 251.976 321.746   2
   4  -3  12 59.1382 249.657   1
   4  -3  12 526.035 297.138   5
   4   3  12 147.493 500.908   4
  -4   3 -13 2326.15 524.321   2
  -4  -3 -13 1819.12 653.483   2
   4   3  13 1701.76 626.731   2
   4  -3  13 1800.29 640.482   1
   4  -3  13 2469.77 626.792   5
   4   3  13 1234.98 560.318   4
  -4   3 -14 4859.46 781.525   2
   4   3  14 3561.05 925.287   2
   4  -3  14 4894.00 1102.79   1
   4  -3  14 3316.31 775.143   5
   4   3  14 4200.50 1057.64   4
  -4   3 -15 1537.84 466.976   2
   4   3  15 690.620 342.589   2
   4  -3  15 1416.23 709.029   1
   4  -3  15 2540.58 699.915   5
   4   3  15 1059.37 603.936   4
  -4   3 -16 12.4057 112.192   2
   4  -3  16 73.2770 328.908   1
   4  -3  16 421.574 379.777   5
   4   3  16 77.6108 284.562   4
  -4   3 -17 4662.65 858.678   2
   4  -3  17 3677.48 1033.14   1
   4  -3  17 5075.10 1021.27   5
   4   3  17 5450.62 1239.74   4
   4  -3  18 3623.63 1055.57   1
  -4   3 -18 3681.85 789.742   2
   4  -3  18 3957.66 929.509   5
   4   3  18 3309.91 976.716   4
   4  -3  19 1954.74 778.498   1
  -4   3 -19 1135.17 459.568   2
   4  -3  19 1286.54 586.124   5
   4   3  19 1048.83 648.073   4
  -4   3 -20 1311.77 522.293   2
   4  -3  20 1089.52 623.228   1
   4  -3  20 1428.57 618.696   5
   4   3  20 1523.59 688.528   4
   4  -3  21 6594.76 1410.43   1
  -4   3 -21 5204.88 1041.18   2
   4  -3  21 6317.29 1264.57   5
   4   3  21 7017.38 1443.70   4
   4  -3  22 1475.75 706.516   1
  -4   3 -22 1581.49 591.318   2
   4  -3  22 916.061 532.176   5
   4   3  22 1238.00 749.016   4
  -4   3 -23 815.150 439.572   2
   4  -3  23 1437.95 661.786   1
   4  -3  23 2212.38 747.382   5
   4   3  23 1785.30 859.039   4
   4  -3  24 941.579 626.281   1
   4  -3  24 644.819 546.779   5
   4   3  24-194.454 365.289   4
   4  -3  25 1107.10 650.326   1
   4  -3  25 1489.33 726.741   5
   4   3  25 1484.40 730.531   4
   4  -3  26 604.166 506.025   1
   4  -3  26 945.320 667.229   5
   4   3  26 726.862 529.579   4
   4  -3  27 99.4191 212.816   1
   4  -3  27 672.052 492.093   5
   4   3  27 627.058 485.375   4
   4  -3  28 314.575 415.629   1
   4  -3  28-213.060 336.687   5
   4   3  28-529.380 454.393   4
   4  -3  29 2289.32 928.854   1
   4  -3  29 668.494 573.251   5
   4   3  29 975.312 644.524   4
   4  -3  30-268.106 335.778   5
   4   3  30-532.581 475.546   4
   4  -3  31 581.327 505.629   1
   4  -3  31-451.730 531.672   5
   4   3  31 728.208 546.977   4
   4  -3  32-215.919 443.853   1
   4  -3  32 287.387 470.711   5
   4   3  32 556.628 525.852   4
   4  -3  33 410.209 402.653   1
   4  -3  33 1098.86 715.264   5
   4  -3  34 175.215 265.459   1
   4  -3  34 524.154 535.425   5
   4  -3  35 2319.91 1018.51   1
   4  -3  35 2698.98 1182.19   5
  -4   4  36 438.094 583.503   5
  -4   4  35 584.176 579.786   5
  -4   4  34-176.657 388.950   5
  -4   4  33 630.334 541.916   5
  -4  -4  32 800.051 734.110   5
  -4   4  32 601.960 513.215   5
  -4   4  31 2851.54 1099.34   5
  -4  -4  31 862.118 854.019   5
  -4   4  30 877.087 595.403   5
  -4  -4  30-577.552 620.234   5
  -4   4  30 120.949 257.818   4
  -4   4  29 827.601 620.446   5
  -4  -4  29 2776.51 1321.51   5
  -4   4  29 2440.37 912.073   4
  -4   4  28 171.537 277.016   5
  -4  -4  28-24.5157 205.194   5
  -4   4  28-414.861 438.911   4
  -4   4  27 691.807 501.464   5
  -4  -4  27 552.753 586.755   5
  -4   4  27-329.651 419.963   4
  -4   4  26 430.051 382.131   5
  -4  -4  26-500.075 570.757   5
  -4   4  26 215.463 317.235   4
  -4   4  25 1109.83 598.710   5
  -4  -4  25 634.147 626.202   5
  -4   4  25 380.867 393.224   4
  -4  -4  25 1069.82 442.570   3
  -4   4  24-174.398 235.692   5
  -4  -4  24 301.354 452.195   5
  -4  -4  24 427.673 288.824   3
  -4   4  24 24.2380 366.293   4
  -4   4  23 4602.42 1131.03   5
  -4  -4  23 4148.54 1384.88   5
  -4   4  23 5064.98 1196.88   4
  -4   4  22 531.944 385.331   5
  -4  -4  22-510.717 555.790   5
  -4   4  22 1082.87 577.565   4
   4   4 -21 10743.2 1622.47   2
  -4   4  21 11132.5 1660.75   5
  -4  -4  21 12020.4 2385.33   5
  -4   4  21 11662.9 1721.10   4
   4   4 -20 402.521 359.311   2
  -4  -4  20 171.011 417.830   5
  -4   4  20 715.246 407.309   5
  -4   4  20 1230.52 617.621   4
   4   4 -19 1425.14 626.094   2
  -4  -4  19 524.541 412.122   5
  -4   4  19 2160.95 707.549   5
  -4   4  19 1194.89 581.074   4
   4   4 -18 631.910 414.720   2
  -4  -4  18 622.263 597.644   5
  -4   4  18 505.317 370.767   4
   4   4 -17 1266.55 566.719   2
  -4  -4  17 2412.69 1166.05   5
  -4   4  17 1137.65 551.745   4
   4   4 -16 33461.7 2630.18   2
  -4  -4  16 38231.9 3924.16   5
  -4   4  16 33960.4 2683.99   4
   4   4 -15 44168.0 2995.36   2
  -4   4  15 42140.4 2599.69   5
  -4  -4  15 47084.2 4313.16   5
  -4   4  15 42713.3 2922.24   4
   4   4 -14 3852.18 896.939   2
   4  -4 -14 3433.15 616.292   1
  -4  -4  14 2158.41 982.824   5
  -4   4  14 2784.80 643.218   5
  -4   4  14 4000.08 929.024   4
   4  -4 -13 5741.00 1200.38   3
   4   4 -13 6205.08 1116.39   2
   4  -4 -13 6400.86 899.349   1
  -4   4  13 6077.67 905.112   5
  -4  -4  13 6353.51 1571.92   5
   4  -4 -13 5158.50 1112.94   4
  -4   4  13 6764.12 1124.41   4
   4   4 -12 6632.46 1115.58   2
   4  -4 -12 7469.65 1363.94   3
   4  -4 -12 7150.05 990.927   1
  -4  -4  12 9508.09 1858.32   5
  -4   4  12 6956.72 906.519   5
  -4   4  12 8291.71 1202.87   4
   4  -4 -12 6567.26 1213.28   4
   4  -4 -11 902.974 427.391   3
   4   4 -11 1129.94 457.235   2
   4  -4 -11 985.723 442.045   1
  -4  -4  11 644.991 592.434   5
  -4   4  11 1228.20 361.162   5
  -4   4  11 1576.96 527.560   4
   4   4 -10 2054.04 625.079   2
   4  -4 -10 1986.48 714.880   3
   4  -4 -10 2212.72 593.463   1
  -4   4  10 1753.84 380.069   5
  -4  -4  10 2165.38 953.750   5
   4   4 -10 1841.38 763.439   5
  -4   4  10 2340.83 628.581   4
   4  -4  -9-123.570 270.924   3
   4   4  -9-346.568 300.002   2
   4  -4  -9-387.539 285.206   1
   4   4  -9-458.307 416.373   5
  -4   4   9 106.181 97.7384   5
  -4  -4   9 56.7324 368.440   5
  -4   4   9 226.676 217.332   4
   4  -4  -8 5896.76 1223.78   3
   4   4  -8 5922.16 1008.24   2
   4  -4  -8 5379.41 952.967   1
   4   4  -8 4400.27 1177.02   5
  -4  -4   8 5835.93 1412.87   5
   4  -4  -7 3594.30 958.410   3
   4   4  -7 3486.25 786.115   2
   4  -4  -7 3191.03 755.219   1
   4   4  -7 2821.55 948.880   5
  -4  -4   7 2789.65 960.301   5
   4   4  -6 2376.19 657.591   2
   4  -4  -6 2451.38 773.387   3
   4  -4  -6 2228.58 661.615   1
   4  -4  -6 2325.43 423.462   2
   4   4  -6 1703.16 759.354   5
  -4  -4   6 2128.80 881.542   5
   4  -4  -5 2000.59 368.554   2
   4   4  -5 1541.86 557.529   2
   4  -4  -5 2411.52 766.425   3
   4  -4  -5 2596.90 691.320   1
   4  -4  -5 2084.66 360.967   2
   4   4  -5 1128.23 585.002   5
  -4  -4   5 2208.15 941.346   5
   4  -4  -4 28816.6 1169.77   2
   4  -4  -4 31049.4 1212.69   2
   4   4  -4 28876.0 2231.16   2
   4  -4  -4 31394.4 2466.71   1
   4   4  -4 32380.3 3224.50   5
  -4   4   4 29991.6 1777.52   4
   4  -4  -4 32977.9 2881.69   3
   4  -4  -3-107.727 384.806   3
   4   4  -3-2.95246 238.107   2
   4  -4  -3 0.76297 36.7277   2
   4  -4  -3 733.470 424.195   1
   4  -4  -3 109.708 64.0176   2
   4   4  -3-470.468 454.642   5
  -4   4   3 327.090 197.610   4
   4  -4  -2 172.126 174.128   3
   4   4  -2-185.203 358.041   2
   4  -4  -2 317.180 315.285   1
  -4   4   2 33.0144 103.523   4
   4   4  -2-293.873 259.182   3
   4   4  -1 778.800 378.879   2
  -4  -4   1 711.122 370.418   2
   4  -4  -1 1244.69 535.571   3
   4  -4  -1 717.735 457.415   1
   4   4  -1 441.334 466.835   5
  -4   4   1 1294.43 335.741   4
   4   4  -1 808.891 424.389   3
  -4  -4   0 3592.54 788.008   2
   4   4   0 2635.73 711.054   2
   4  -4   0 3129.95 844.635   1
   4   4   0 1661.96 784.995   5
  -4   4   0 3068.92 459.053   4
   4  -4   0 2037.11 750.740   3
   4   4   0 3082.82 792.963   3
   4   4   1-142.101 217.639   3
  -4  -4  -1-341.438 276.666   2
   4  -4   1 681.502 425.233   1
   4   4   1-93.9702 227.898   2
   4   4   1 632.380 499.267   5
   4  -4   1 354.962 349.029   3
  -4  -4  -2 29263.0 2292.81   2
   4   4   2 30602.5 2373.61   2
   4  -4   2 29182.3 2573.95   1
   4   4   2 30982.1 3256.09   5
   4  -4   2 32641.1 2921.67   3
   4   4   2 31359.7 2552.17   3
   4   4   3 4033.79 931.376   3
  -4  -4  -3 3132.65 775.199   2
   4   4   3 3150.15 1073.82   5
   4   4   3 3460.34 826.262   2
   4  -4   3 4288.77 1035.79   1
   4   4   4 1579.87 618.981   3
  -4  -4  -4 1351.40 496.609   2
   4   4   4 669.856 667.866   5
   4  -4   4 1499.84 602.232   1
   4   4   4 1357.04 534.507   2
  -4  -4  -5 4020.27 892.909   2
   4   4   5 3895.71 944.185   3
   4   4   5 5889.95 1461.04   5
   4   4   5 4171.99 944.018   2
   4  -4   5 3825.98 999.924   1
  -4  -4  -6 7892.96 1257.09   2
   4   4   6 9928.46 1428.47   2
   4   4   6 7323.19 1304.79   3
   4   4   6 5945.40 1457.89   5
   4  -4   6 7760.53 1406.91   1
  -4  -4  -7 12968.7 1654.74   2
   4   4   7 13461.4 1704.94   2
   4   4   7 14481.5 2284.46   5
   4  -4   7 15654.5 2008.91   1
  -4  -4  -8 4018.58 940.530   2
   4  -4   8 3862.44 455.326   5
   4   4   8 5578.40 1155.20   2
  -4  -4  -9-533.663 356.106   2
   4  -4   9 184.329 141.751   5
   4  -4   9-25.0519 253.440   1
   4   4   9-951.732 522.364   2
  -4  -4 -10 1129.46 519.326   2
   4  -4  10 1424.01 652.963   1
   4   4  10 1741.92 584.969   2
   4  -4  10 1446.19 396.414   5
   4  -4  11 3334.11 961.914   1
   4   4  11 2954.95 881.019   2
   4  -4  11 3764.67 667.932   5
   4   4  11 3383.83 1029.20   4
  -4   4 -12 585.109 163.779   2
   4  -4  12 2759.43 901.138   1
   4   4  12 1644.78 752.652   2
   4  -4  12 1370.79 451.301   5
   4   4  12 1651.94 755.852   4
  -4   4 -13 1065.34 251.638   2
   4   4  13 558.601 402.512   2
   4  -4  13 1616.86 727.165   1
   4  -4  13 1287.03 459.858   5
   4   4  13 1083.46 620.714   4
  -4   4 -14 2516.41 422.176   2
   4  -4  14 2113.13 814.930   1
   4   4  14 2157.37 791.895   2
   4  -4  14 2580.73 642.102   5
   4   4  14 1858.18 801.029   4
  -4   4 -15 1542.25 375.410   2
   4  -4  15 1223.13 642.044   1
   4   4  15 375.172 426.423   2
   4  -4  15 843.546 398.912   5
   4   4  15 1069.39 609.532   4
  -4   4 -16 508.002 238.513   2
   4  -4  16 773.750 542.502   1
   4  -4  16 413.241 329.066   5
   4   4  16 711.807 521.369   4
  -4   4 -17 10053.5 1091.73   2
   4  -4  17 13721.2 2122.51   1
   4  -4  17 12319.9 1616.50   5
   4   4  17 12288.5 2003.34   4
   4  -4  18-187.252 380.256   1
   4  -4  18 563.685 379.937   5
   4   4  18-146.424 380.148   4
   4  -4  19-78.4401 305.998   1
   4  -4  19-67.4040 224.184   5
   4   4  19-112.189 341.679   4
   4  -4  20-377.865 420.373   1
   4  -4  20 125.841 264.731   5
   4   4  20 534.704 484.113   4
   4  -4  21 4888.75 1295.80   1
   4  -4  21 5421.32 1209.89   5
   4  -4  22 1845.98 932.281   1
   4  -4  22 1303.94 639.948   5
   4   4  22 1890.18 860.046   4
   4  -4  23 761.001 549.541   1
   4  -4  23 348.919 370.637   5
   4   4  23 314.853 429.129   4
   4  -4  24 2498.99 997.346   1
   4  -4  24 486.964 447.198   5
   4   4  24 2887.52 1049.75   4
   4  -4  25 1827.49 900.148   1
   4  -4  25 939.734 579.340   5
   4   4  25 1857.88 847.615   4
   4  -4  26-367.342 411.308   1
   4  -4  26-957.679 600.225   5
   4   4  26-262.030 370.167   4
   4  -4  27-653.442 591.206   1
   4  -4  27 15.7039 74.8624   5
   4   4  27-13.7485 374.025   4
   4  -4  28 675.318 592.037   1
   4   4  28 1622.92 814.129   4
   4  -4  29 662.852 616.930   1
   4  -4  29-572.058 500.246   5
   4  -4  30-376.655 533.954   1
   4  -4  30 1509.54 808.466   5
   4  -4  31-298.708 359.660   5
  -4  -5  30-1061.82 830.480   5
  -4  -5  29 561.214 681.454   5
  -4  -5  28 281.289 477.452   5
  -4   5  28-350.042 389.265   4
   4   5 -27 829.233 543.315   2
  -4  -5  27 1647.32 1018.07   5
  -4   5  27 1290.50 675.375   4
   4   5 -26 423.848 400.749   2
  -4  -5  26-716.855 708.730   5
  -4   5  26-713.950 520.020   4
   4   5 -25 541.452 420.553   2
  -4  -5  25 1771.48 1015.35   5
  -4   5  25 1215.31 670.673   4
   4   5 -24 933.531 530.798   2
  -4  -5  24 3079.72 1556.41   5
  -4   5  24 1933.76 828.745   4
   4   5 -23 926.316 521.290   2
  -4  -5  23 887.745 691.980   5
  -4   5  23 353.877 406.873   4
   4   5 -22 272.616 314.599   2
  -4  -5  22-191.650 502.235   5
  -4   5  22 158.303 302.411   4
   4   5 -21-93.4599 249.612   2
  -4  -5  21 202.248 211.675   3
  -4  -5  21-274.604 574.007   5
  -4   5  21-392.000 379.414   4
  -4  -5  20 474.185 328.823   3
   4   5 -20 265.840 319.390   2
  -4  -5  20 1089.61 815.742   5
  -4   5  20 221.558 300.663   4
  -4  -5  19 77.9489 283.074   3
   4   5 -19-7.92675 137.128   2
  -4   5  19 130.947 301.266   4
  -4  -5  18 816.399 404.832   3
   4   5 -18 545.368 393.091   2
  -4  -5  18 1069.83 826.130   5
  -4   5  18 782.264 506.512   4
  -4  -5  17 651.591 374.058   3
   4   5 -17 209.736 260.048   2
  -4  -5  17-277.634 468.784   5
  -4   5  17 708.119 473.374   4
  -4  -5  16-318.141 297.741   3
   4   5 -16 807.408 423.583   2
  -4  -5  16 731.210 612.568   5
  -4   5  16-78.3639 119.546   5
  -4   5  16 92.4204 285.621   4
   4   5 -15 1464.25 571.616   2
  -4  -5  15 859.268 433.391   3
  -4  -5  15-168.107 404.375   5
  -4   5  15 637.617 300.930   5
  -4   5  15 548.496 398.865   4
  -4  -5  14-125.682 192.454   3
   4   5 -14 409.225 306.530   2
  -4  -5  14-392.334 552.201   5
  -4   5  14-3.79180 157.311   4
  -4  -5  13 1439.09 577.622   3
   4   5 -13 1678.49 618.763   2
  -4   5  13 1385.18 366.175   5
  -4  -5  13 1783.96 929.569   5
  -4   5  13 1470.84 588.503   4
  -4  -5  12 332.602 288.344   3
   4  -5 -12 373.644 384.248   3
   4   5 -12 149.493 257.314   2
  -4  -5  12 303.866 638.462   5
  -4   5  12 17.4118 166.276   4
  -4  -5  11 584.863 373.366   3
   4  -5 -11 1185.58 678.246   3
   4   5 -11 733.299 391.056   2
  -4   5  11 982.298 469.814   4
  -4  -5  11 2239.29 993.548   5
   4  -5 -10 1328.74 514.086   1
   4  -5 -10 1168.27 624.099   3
  -4  -5  10 1030.31 449.551   3
   4   5 -10 1093.38 476.966   2
  -4  -5  10 1369.74 759.697   5
  -4   5  10 1361.61 529.960   4
   4  -5  -9 1171.95 518.256   1
   4  -5  -9 1271.65 681.067   3
   4   5  -9 840.442 428.977   2
  -4  -5   9 832.368 620.939   5
  -4   5   9 1363.07 476.670   4
   4  -5  -8 1278.83 496.536   1
   4  -5  -8 918.370 595.600   3
   4   5  -8 485.936 331.055   2
  -4  -5   8 1335.12 743.476   5
  -4   5   8 701.398 360.016   4
   4  -5  -7-506.915 357.597   1
   4  -5  -7-374.951 383.655   3
   4   5  -7-718.100 413.792   2
   4  -5  -7 78.7494 90.8776   2
  -4   5   7 61.9229 169.539   4
   4  -5  -6 2195.22 718.291   1
   4  -5  -6 2168.88 821.081   3
   4   5  -6 2217.12 662.045   2
  -4   5   6 2272.74 592.714   4
   4  -5  -5 150.537 252.892   1
   4  -5  -5-557.731 478.300   3
   4   5  -5 40.4068 186.229   2
   4   5  -4-137.932 223.041   2
   4  -5  -4 402.116 248.433   1
   4  -5  -4-356.136 422.065   3
   4   5  -3 3780.17 852.613   2
   4  -5  -3 3365.77 949.106   1
   4  -5  -3 3655.92 1145.32   3
   4  -5  -2 5427.25 1201.99   1
   4   5  -2 5733.45 1068.78   2
   4  -5  -2 5716.49 1340.14   3
  -4   5   2 5456.23 773.614   4
   4   5  -1 5326.87 1030.56   2
   4  -5  -1 6127.68 1286.69   1
   4  -5  -1 6978.36 1513.51   3
  -4   5   1 6941.56 839.218   4
   4   5   0 1579.35 582.968   2
   4  -5   0 2016.90 743.315   1
   4  -5   0 1575.75 730.019   3
  -4   5   0 1606.99 395.136   4
   4  -5   1-259.699 324.605   1
   4   5   1-336.786 321.719   2
   4  -5   1-472.801 436.708   3
  -4  -5  -1-56.8319 233.265   2
  -4   5  -1-32.0771 97.1621   4
   4  -5   2 1607.44 701.379   1
   4   5   2 575.412 391.304   2
   4  -5   2 363.001 443.948   3
  -4  -5  -2 903.965 416.013   2
  -4   5  -2 839.877 236.972   4
   4  -5   3-143.115 286.310   1
   4   5   3-487.835 389.642   2
  -4  -5  -3-128.215 175.059   2
   4  -5   3-255.385 386.847   3
   4   5   4-48.8802 228.058   2
   4  -5   4 362.191 281.264   1
  -4  -5  -4 558.100 366.346   2
   4  -5   4-445.710 483.209   3
   4  -5   5 3787.90 1070.65   1
   4   5   5 5105.31 1084.03   2
  -4  -5  -5 5105.19 1056.00   2
   4  -5   5 6542.38 1487.80   3
   4  -5   6-424.390 423.210   1
   4   5   6-367.977 352.280   2
  -4  -5  -6 38.1846 273.156   2
   4  -5   6-219.746 368.686   3
   4  -5   7-124.282 270.422   1
   4  -5   7-138.423 331.798   3
   4   5   8-441.216 378.191   2
   4  -5   8-129.682 372.245   1
   4  -5   8 580.546 497.765   3
   4   5   9 2316.56 804.524   2
   4  -5   9 1145.43 628.978   1
   4   5   9 2470.16 963.068   4
   4  -5  10 1739.64 917.927   1
   4   5  10 1981.48 725.015   2
   4   5  10 2733.10 1016.10   4
   4  -5  11 1232.68 673.542   1
   4   5  11 511.892 396.941   2
   4   5  11 548.216 534.389   4
   4  -5  12-423.659 421.939   1
   4   5  12 1117.63 582.918   2
   4   5  12 1672.21 856.094   4
   4  -5  13-481.636 428.788   1
   4   5  13 836.899 607.436   4
   4  -5  14 236.761 372.364   1
   4   5  14 698.250 619.487   4
   4  -5  15 1407.05 717.492   1
   4   5  15 1967.56 890.403   4
   4  -5  16 494.779 520.700   1
   4   5  16 83.2293 349.305   4
   4  -5  17-518.472 530.359   1
   4   5  17 309.531 427.434   4
   4  -5  18-344.853 431.193   1
   4   5  18-378.065 496.564   4
   4  -5  19 1494.40 771.481   1
   4   5  19 1455.10 796.092   4
   4  -5  20 913.572 678.925   1
   4   5  20 113.519 345.360   4
   4  -5  21-78.3231 397.927   1
   4   5  21 610.844 579.271   4
   4  -5  22-319.534 418.185   1
   4   5  22 387.272 479.601   4
   4  -5  23 774.505 623.361   1
   4   5  23 566.036 559.307   4
  -4  -6  25-1906.84 1086.50   5
  -4  -6  24 124.645 517.437   5
  -4   6  24 358.422 432.405   4
  -4  -6  23 1015.28 799.662   5
  -4   6  23 748.175 504.517   4
  -4  -6  22-825.398 722.048   5
  -4   6  22 92.0667 272.888   4
  -4  -6  21 138.147 423.404   5
  -4   6  21 147.585 311.970   4
  -4  -6  20 970.659 788.981   5
  -4   6  20 142.753 275.792   4
  -4  -6  19-697.167 632.344   5
  -4   6  19 245.054 370.032   4
  -4  -6  18 1679.87 935.695   5
  -4   6  18-151.043 274.366   4
  -4  -6  17-400.534 559.251   5
  -4   6  17-133.768 280.403   4
  -4  -6  16-191.977 254.457   3
  -4  -6  16-568.409 606.869   5
  -4   6  16 508.591 388.422   4
  -4  -6  15 922.612 464.803   3
  -4  -6  15 862.425 609.880   5
  -4   6  15 1199.89 581.255   4
  -4  -6  14 56.3201 183.087   3
  -4  -6  14-104.277 380.871   5
  -4   6  14 510.756 362.942   4
  -4  -6  13 673.738 407.152   3
  -4  -6  13 659.314 607.999   5
  -4   6  13-2.09070 187.967   4
  -4  -6  12 424.006 471.801   5
  -4   6  12-222.510 290.756   4
   4  -6 -11 692.295 554.202   3
  -4   6  11 57.5440 117.476   4
   4  -6 -10-602.950 508.798   3
  -4   6  10 36.7368 195.594   4
   4  -6  -9 369.649 469.726   3
  -4   6   9 203.028 238.597   4
   4   6  -8-172.844 255.969   2
   4  -6  -8-247.750 415.735   3
  -4   6   8 269.421 242.567   4
   4   6  -7 909.341 474.307   2
   4  -6  -7 1488.48 772.852   3
  -4   6   7 606.424 361.690   4
   4   6  -6 1549.43 576.260   2
   4  -6  -6 687.423 585.674   3
  -4   6   6 1199.03 505.220   4
   4   6  -5 98.8921 192.302   2
   4  -6  -5 267.331 640.579   3
  -4   6   5 239.476 278.440   4
   4   6  -4 242.134 278.589   2
  -4   6   4-90.9910 152.457   4
   4   6  -3-499.599 357.594   2
   4  -6  -3-181.185 307.697   1
   4  -6  -3-185.982 351.769   3
   4   6  -2 447.616 367.320   2
   4  -6  -2-15.1436 268.058   1
   4   6  -1-10.8611 199.244   2
   4  -6  -1 231.343 453.101   1
   4  -6  -1 26.4336 316.294   3
   4  -6   0 1329.17 638.022   1
   4   6   0 967.511 511.832   2
   4  -6   0 877.765 644.071   3
   4  -6   1 107.162 272.886   1
   4   6   1 559.938 375.337   2
   4  -6   1 594.404 586.598   3
   4   6   2 554.923 384.457   2
   4  -6   2 663.778 512.945   1
   4  -6   2-140.655 371.192   3
   4   6   3-448.289 343.695   2
   4  -6   3-60.3343 230.725   1
   4  -6   3 367.652 518.842   3
   4   6   4-553.323 388.856   2
   4  -6   4-266.833 427.958   1
   4  -6   4-200.930 397.839   3
   4  -6   5 718.807 512.623   1
   4   6   5 1030.56 626.626   2
   4  -6   5-144.134 359.028   3
   4  -6   6 2023.78 842.412   1
   4   6   6 734.440 439.133   2
   4  -6   6 3563.58 1194.09   3
   4   6   6 2980.62 1099.37   4
   4  -6   7-470.425 487.348   1
   4   6   7 179.330 302.895   2
   4  -6   7 21.0659 287.644   3
   4  -6   8 489.420 468.816   1
   4   6   8 2079.50 762.099   2
   4  -6   8 1575.24 828.786   3
   4   6   8 2237.46 959.881   4
   4  -6   9 2440.51 969.901   1
   4  -6   9 1347.50 780.828   3
   4   6   9 2116.92 907.470   4
   4  -6  10 442.816 449.708   1
   4  -6  10 1646.43 864.590   3
   4   6  10 1027.98 722.843   4
   4  -6  11 134.753 307.338   1
   4   6  11-350.065 455.124   4
   4  -6  11-248.452 383.052   3
   4  -6  12 1582.97 690.819   1
   4  -6  12 1645.10 882.230   3
   4   6  12 1697.03 871.116   4
   4  -6  13 531.926 483.413   1
   4  -6  13 1064.45 752.516   3
   4   6  13 1433.15 828.463   4
   4  -6  14 681.130 598.136   1
   4   6  14 313.807 403.668   4
   4  -6  14-365.213 440.953   3
   4  -6  15-995.642 691.315   1
   4  -6  15 83.8007 271.495   3
   4  -6  16 693.236 594.751   1
   4   6  16 564.039 575.938   4
   4   6  17 1702.48 880.195   4
   4   7   2 25.9450 353.422   4
   4   7   3 1046.08 867.981   4
   4   7   4 1126.66 736.384   4
   4   7   5-364.533 517.775   4
   4   7   6 329.762 450.888   4
   4   7   7 419.933 618.328   4
   4   7   8 269.689 509.792   4
  -5   0  37 66.4890 291.984   5
  -5   0  36-1858.20 1037.48   5
  -5   0  35 1115.87 838.639   5
  -5   0  34 213.875 413.646   5
  -5   0  33 683.458 586.341   5
  -5   0  32 7008.84 1790.09   5
  -5   0  31 730.503 628.752   5
  -5   0  30 4252.09 1415.89   5
  -5   0  29-377.686 246.841   3
  -5   0  29-218.916 338.232   5
  -5   0  28 100.237 125.959   3
   5   0 -28 81.5775 138.668   1
  -5   0  27 27.1162 128.325   3
   5   0 -27-217.271 182.405   1
  -5   0  26 208.934 179.976   3
  -5   0  26 141.671 322.890   5
   5   0 -26 416.607 262.868   1
  -5   0  25 111.565 134.177   3
   5   0 -25-68.3653 122.148   1
  -5   0  24 2527.24 557.661   3
  -5   0  24 4498.48 1286.47   5
   5   0 -24 3532.02 712.625   1
  -5   0  23 171.873 169.805   3
   5   0 -23-170.698 169.259   1
  -5   0  22 2391.72 533.587   3
  -5   0  22 2641.16 930.922   5
   5   0 -22 2458.96 560.306   1
  -5   0  21 140.599 148.397   3
  -5   0  21 628.632 473.091   5
  -5   0  20 179.048 141.720   3
  -5   0  20-10.8474 243.355   5
   5   0 -20 404.825 348.868   5
  -5   0  19 54.1827 107.112   3
  -5   0  19-425.264 396.738   5
   5   0 -19 57.6849 166.925   5
   5   0 -19 72.6469 242.443   4
  -5   0  18 2709.74 478.032   3
  -5   0  18 3337.97 1011.90   5
   5   0 -18 3677.92 976.355   5
   5   0 -18 2976.85 738.119   4
  -5   0  17 279.229 388.271   5
   5   0 -17-380.507 327.051   5
   5   0 -17-137.748 182.337   4
  -5   0  17 144.972 117.399   3
   5   0 -16 12737.4 1698.06   5
  -5   0  16 12063.0 1863.21   5
   5   0 -16 14948.9 1588.69   4
  -5   0  16 12934.0 940.058   3
  -5   0  15 148.291 333.847   5
   5   0 -15-157.423 228.898   5
  -5   0  14 5190.49 1216.17   5
   5   0 -14 6324.04 1143.79   5
   5   0 -13 40.3822 162.238   5
   5   0 -12 15744.7 1807.41   5
   5   0 -11-122.053 186.535   5
   5   0 -10 32591.8 2509.14   5
   5   0  -9-76.0786 102.210   3
   5   0  -9-35.6446 268.716   5
   5   0  -8 37312.4 2671.64   5
   5   0  -8 39728.9 1371.14   3
   5   0  -7-84.9377 169.689   5
  -5   0   7-444.295 370.968   5
   5   0  -7-91.6351 157.673   3
   5   0  -6 3860.57 867.968   5
  -5   0   6 3789.37 874.207   5
  -5   0   5-209.218 399.214   5
   5   0  -5-426.811 307.717   5
  -5   0   4 164.656 287.053   5
   5   0  -4-4.70844 159.770   5
   5   0  -3-56.3550 192.599   5
  -5   0   3-230.100 303.165   5
   5   0  -2 53125.2 3135.15   5
  -5   0   2 55444.3 3064.36   5
  -5   0   1 77.0321 134.430   2
   5   0  -1-94.1589 220.281   5
  -5   0   1 11.2380 327.368   5
  -5   0   0 11513.0 1209.97   2
   5   0   0 9059.96 1295.74   5
  -5   0  -1-87.5683 220.283   2
   5   0   1-96.9316 166.494   5
  -5   0  -2 35387.1 2132.41   2
   5   0   2 38014.0 2191.24   2
   5   0   2 35585.6 2499.72   5
  -5   0  -3-146.208 220.050   2
   5   0   3-214.046 311.219   2
   5   0   3-225.496 230.780   5
  -5   0  -4 27674.4 1934.93   2
   5   0   4 27438.0 1934.73   2
   5   0   4 23927.6 2035.71   5
   5   0   5-41.4127 224.189   2
  -5   0  -5 37.7567 150.398   2
   5   0   6 2032.59 568.784   2
  -5   0  -6 2434.57 595.786   2
   5   0   7-108.757 309.141   2
  -5   0  -7-182.018 197.030   2
   5   0   8-58.6208 222.984   2
  -5   0  -8 824.108 347.339   2
   5   0   9-457.278 335.708   2
  -5   0  -9-394.320 286.768   2
   5   0  10 7919.50 1146.11   2
  -5   0 -10 8197.71 1179.32   2
   5   0  11-726.669 408.923   2
  -5   0 -11-114.006 205.240   2
  -5   0 -12 11532.9 1485.96   2
   5   0  12 12835.4 1536.30   2
   5   0  12 11991.8 1286.81   4
   5   0  13-159.406 290.340   2
  -5   0 -13-53.6723 300.757   2
   5   0  13-14.4015 84.6017   4
   5   0  14 29154.5 2409.79   2
  -5   0 -14 33829.3 2649.17   2
   5   0  14 31424.0 2147.48   4
   5   0  15-226.086 305.463   2
  -5   0 -15 65.5305 177.759   2
   5   0  15 267.749 181.718   4
   5   0  16 740.434 438.202   2
  -5   0 -16 1991.10 694.695   2
   5   0  16 2027.95 594.797   4
  -5   0 -17-177.788 227.500   2
   5   0  17 29.5716 253.395   2
   5   0  17-34.5531 195.835   4
   5   0  18 4762.04 1047.06   2
   5   0  18 4352.61 879.225   4
   5   0  19-13.4178 287.260   4
   5   0  20 4777.75 946.632   4
   5   0  21 437.826 420.815   4
   5   0  22 15161.5 1735.71   4
   5   0  23 57.6902 209.150   1
   5   0  23-459.904 345.104   4
   5   0  24 2797.57 773.391   1
   5   0  24 3831.07 879.621   4
   5   0  25 29.6867 221.703   1
   5   0  25 141.717 247.978   4
   5   0  26 2295.50 713.845   1
   5   0  26 2385.41 756.773   4
   5   0  27-284.210 299.404   1
   5   0  27-100.884 260.886   4
   5   0  28 2985.26 844.042   1
   5   0  28 3996.98 982.830   4
   5   0  29 163.468 297.730   1
   5   0  29 318.218 377.479   4
   5   0  30 6623.13 1279.37   1
   5   0  30 6230.03 1247.26   4
   5   0  31 221.248 312.013   1
   5   0  31 46.3100 222.545   4
   5   0  32 3047.95 931.814   1
   5   0  32 3555.82 1035.55   4
   5   0  33 67.0232 224.205   1
   5   0  33-542.875 432.256   4
   5   0  34 2693.07 850.509   1
   5   0  34 1984.77 747.237   4
   5   0  35-385.220 346.557   4
   5   0  36-78.4046 279.733   4
   5   0  37-119.736 302.065   4
  -5   1  37-201.991 368.192   5
  -5  -1  36 1744.24 1061.13   5
  -5   1  36 758.867 708.728   5
  -5  -1  35 3578.31 1480.00   5
  -5   1  35-994.920 736.056   5
  -5  -1  34 5918.15 1845.63   5
  -5   1  34 9653.55 2299.06   5
  -5  -1  33 464.452 621.256   5
  -5   1  33-1345.02 841.196   5
  -5  -1  32 1439.08 870.013   5
  -5   1  32 589.706 578.047   5
  -5  -1  31-4.36572 581.913   5
  -5   1  31 543.166 527.536   5
  -5  -1  30 4960.07 1548.01   5
  -5   1  30 1605.56 863.531   5
  -5   1  29 3.59912 183.069   3
  -5  -1  29 308.618 414.754   5
  -5   1  29 235.970 360.726   5
   5   1 -29 442.682 307.805   1
  -5   1  28 3064.83 810.595   3
  -5  -1  28 4754.25 1520.65   5
  -5   1  28 3649.56 1234.05   5
   5   1 -28 3665.23 857.330   1
  -5   1  27 1117.32 473.309   3
   5   1 -27 1057.04 468.785   1
  -5  -1  27 348.883 660.381   5
  -5   1  27 739.750 580.905   5
   5  -1 -26 12591.3 897.509   1
   5   1 -26 11391.5 1503.48   1
  -5  -1  26 11014.6 2192.50   5
  -5   1  26 12725.4 2181.81   5
  -5   1  26 13843.8 1620.23   3
  -5   1  25-113.010 165.583   3
   5  -1 -25 18.2688 60.8374   1
   5   1 -25-489.799 315.231   1
  -5   1  25 636.948 542.107   5
  -5  -1  25 276.319 443.761   5
   5  -1 -24 11929.6 950.674   1
   5   1 -24 10724.0 1448.29   1
  -5   1  24 15290.9 2325.19   5
  -5  -1  24 12820.2 2311.79   5
  -5  -1  24 11792.3 977.829   3
  -5   1  24 11868.4 1440.77   3
  -5  -1  23 2435.41 432.510   3
  -5   1  23 1689.90 533.022   3
   5  -1 -23 2201.52 428.753   1
   5   1 -23 2071.85 632.644   1
  -5  -1  23 2269.03 1057.41   5
  -5   1  23 4026.25 1221.29   5
   5  -1 -22 19254.7 1240.15   1
   5   1 -22 16601.1 1744.79   1
  -5   1  22 17508.3 2363.23   5
  -5  -1  22 17177.0 2556.49   5
  -5  -1  22 18058.2 1093.30   3
  -5   1  22 17633.9 1675.60   3
  -5   1  21 108.831 164.517   3
  -5  -1  21 170.152 110.178   3
   5   1 -21-406.679 262.671   1
  -5  -1  21 245.777 356.422   5
  -5   1  21-162.661 281.216   5
   5   1 -20 11690.6 1407.64   1
  -5   1  20 10662.4 1781.82   5
  -5  -1  20 10262.5 1932.66   5
  -5  -1  20 11138.0 748.582   3
  -5   1  20 11089.0 1271.86   3
  -5  -1  19 1636.88 263.398   3
  -5   1  19 1346.19 435.182   3
  -5   1  19 819.256 591.783   5
  -5  -1  18 1113.59 186.714   3
  -5   1  18 1062.06 577.069   5
  -5  -1  18 741.717 484.719   5
   5   1 -18 1408.86 655.458   5
  -5   1  18 1156.67 369.768   3
   5  -1 -18 1500.69 555.945   4
  -5   1  17 2284.46 785.196   5
  -5  -1  17 1692.64 831.875   5
   5   1 -17 1759.12 698.182   5
  -5   1  17 1344.33 422.089   3
   5  -1 -17 1959.76 609.073   4
  -5   1  16 1113.84 625.945   5
   5  -1 -16-331.330 286.936   5
  -5  -1  16 418.513 431.134   5
   5   1 -16 468.150 376.362   5
  -5   1  16 502.552 260.896   3
   5  -1 -16 491.521 346.906   4
   5  -1 -15 1597.82 569.837   5
   5  -1 -15 1646.99 549.670   4
   5  -1 -14 33837.1 2492.49   5
   5   1 -14 36080.6 2999.67   5
   5  -1 -14 35646.1 2406.91   4
   5  -1 -13 10903.1 1384.56   5
   5   1 -13 11417.4 1674.80   5
   5  -1 -13 11735.3 1350.85   4
   5  -1 -12 2242.33 456.879   3
   5  -1 -12 2239.34 630.286   5
   5   1 -12 2129.37 753.982   5
   5  -1 -12 2237.10 567.707   4
   5  -1 -11 3653.70 599.745   3
  -5   1  11 4414.14 968.923   5
   5  -1 -11 3786.12 797.472   5
   5   1 -11 4030.80 997.409   5
   5  -1 -11 4149.42 749.644   4
   5  -1 -10 698.239 235.034   3
   5   1 -10 693.141 420.380   5
   5  -1 -10 738.739 376.876   5
  -5   1  10-212.603 253.180   5
   5  -1 -10 872.703 386.810   4
   5  -1  -9 14.1232 134.932   3
   5   1  -9 275.635 227.862   5
   5  -1  -9 114.504 187.410   5
  -5   1   9 274.519 247.829   5
   5  -1  -9-41.0671 122.826   4
   5  -1  -8 60479.8 2977.85   5
   5   1  -8 62367.5 3823.79   5
  -5   1   8 62757.4 3343.80   5
   5  -1  -8 63312.8 2514.74   3
  -5   1   7 10219.2 1323.93   5
   5  -1  -7 10261.0 1238.56   5
   5   1  -7 9122.58 1460.30   5
   5  -1  -7 8999.15 956.496   3
   5  -1  -6 225.034 225.443   2
   5  -1  -6-28.0390 213.969   5
   5   1  -6-5.78866 318.293   5
  -5   1   6 456.609 384.996   5
   5  -1  -6-191.532 187.982   3
   5  -1  -5 5476.96 824.615   2
   5  -1  -5 5252.39 890.731   5
   5   1  -5 5434.56 1115.26   5
  -5   1   5 3873.25 782.516   5
   5  -1  -4 2678.36 580.952   2
  -5   1   4 2325.86 600.281   5
   5  -1  -4 2203.79 583.947   5
   5   1  -4 3901.62 963.310   5
   5  -1  -3 16370.3 1373.30   2
   5  -1  -3 17037.8 1568.44   5
   5   1  -3 15800.5 1873.90   5
  -5   1   3 17167.8 1547.15   5
   5  -1  -2-68.7496 263.124   2
  -5  -1   2-179.184 323.984   2
   5   1  -2-684.575 425.660   5
   5  -1  -2 58.6183 263.448   5
  -5   1   2 8.86787 221.419   5
   5  -1  -1 2681.28 572.849   2
  -5  -1   1 2420.90 596.386   2
   5  -1  -1 3081.79 681.571   5
   5   1  -1 2817.94 782.147   5
  -5   1   0 108579. 3484.35   2
  -5  -1   0 105999. 3883.74   2
   5  -1   0 106199. 3403.17   2
   5  -1   0 106089. 3945.44   5
   5   1   0 102410. 4746.27   5
  -5  -1  -1 303.484 248.250   2
   5  -1   1-90.2456 281.340   2
  -5   1  -1-149.944 240.723   2
   5  -1   1-248.856 395.122   5
   5   1   1 7.36696 343.186   5
  -5   1  -2 28350.1 1805.01   2
   5  -1   2 28559.6 1775.57   2
  -5  -1  -2 28555.5 2037.41   2
   5  -1   2 25601.9 1936.79   5
   5   1   2 26051.1 2347.87   5
  -5   1  -3 60660.7 2664.50   2
  -5  -1  -3 62023.0 3037.19   2
   5  -1   3 60639.3 2626.61   2
   5   1   3 60567.1 3599.55   5
   5  -1   3 58155.1 2883.17   5
  -5   1  -4 6720.79 900.386   2
  -5  -1  -4 6734.83 1027.26   2
   5  -1   4 7335.04 933.621   2
   5  -1   4 6914.45 1007.48   5
   5   1   4 5661.99 1105.39   5
  -5   1  -5 42408.8 2275.75   2
  -5  -1  -5 41140.4 2556.94   2
   5  -1   5 40383.7 2190.04   2
   5   1   5 42679.5 3030.57   5
  -5   1  -6 10466.6 1157.80   2
  -5  -1  -6 10865.8 1336.72   2
   5  -1   6 10581.8 1143.88   2
   5  -1   7 9172.75 1094.30   2
  -5  -1  -7 10337.4 1332.67   2
  -5   1  -7 8399.40 1057.07   2
   5  -1   8 4900.63 817.342   2
  -5   1  -8 6184.51 927.090   2
  -5  -1  -8 5978.85 1027.85   2
   5  -1   9 1001.68 390.144   2
  -5   1  -9 954.084 393.680   2
  -5  -1  -9 1155.82 500.292   2
  -5  -1 -10 77003.4 3846.97   2
   5  -1  10 70438.5 3230.00   2
  -5   1 -10 73731.0 3326.35   2
   5  -1  10 72345.9 2495.09   4
   5  -1  11 1000.86 455.176   2
  -5   1 -11 1156.02 441.908   2
  -5  -1 -11 1673.46 604.040   2
   5  -1  11 924.342 265.200   4
  -5   1 -12 9109.67 1230.15   2
  -5  -1 -12 9280.52 1397.31   2
   5  -1  12 8147.88 1168.04   2
   5  -1  12 8660.23 891.513   4
   5   1  13 1208.78 534.659   2
   5  -1  13 525.336 318.987   2
  -5   1 -13 1392.72 507.615   2
  -5  -1 -13 1391.58 573.718   2
   5   1  13 636.492 356.024   4
   5  -1  13 1133.27 357.340   4
   5   1  14 9729.23 1467.30   2
  -5  -1 -14 11954.4 1644.00   2
  -5   1 -14 10785.9 1445.21   2
   5  -1  14 11820.7 1467.51   2
   5   1  14 11448.6 1472.42   4
   5  -1  14 12828.5 1144.81   4
   5   1  15 3236.64 878.495   2
   5  -1  15 3313.07 817.565   2
  -5  -1 -15 4018.77 1003.37   2
  -5   1 -15 4376.01 956.562   2
   5  -1  15 4158.31 682.462   4
   5   1  15 3797.43 863.645   4
   5   1  16 1171.36 541.973   2
   5  -1  16 753.349 419.664   2
  -5   1 -16 1341.48 542.019   2
   5  -1  16 1305.97 385.165   4
   5   1  16 849.087 438.218   4
  -5   1 -17 2711.14 767.645   2
   5  -1  17 4144.53 913.495   1
   5   1  17 3862.23 978.541   2
   5  -1  17 3739.79 662.937   4
   5   1  17 2829.12 779.680   4
  -5   1 -18 2710.00 772.320   2
   5  -1  18 1290.76 590.091   1
   5   1  18 2664.60 845.856   2
   5  -1  18 1937.77 507.569   4
   5   1  18 3002.50 815.458   4
  -5   1 -19 2868.95 836.521   2
   5  -1  19 2948.42 826.111   1
   5   1  19 3664.94 993.495   2
   5  -1  19 3244.32 656.505   4
   5   1  19 4057.44 933.043   4
   5  -1  20 304.774 322.475   1
   5  -1  20 194.692 170.950   4
   5   1  20 161.387 282.827   4
   5  -1  21 1756.03 686.747   1
   5  -1  21 2429.47 597.242   4
   5   1  21 1500.71 618.575   4
   5  -1  22 2550.05 821.094   1
   5  -1  22 2225.34 568.697   4
   5   1  22 1917.47 728.720   4
   5  -1  23 635.280 416.970   1
   5  -1  23 81.9974 197.430   4
   5   1  23-235.535 308.005   4
   5  -1  24 1491.58 638.525   1
   5   1  24 1055.22 558.204   4
   5  -1  24 1875.68 561.048   4
   5  -1  25 994.269 574.777   1
   5   1  25 1083.52 561.130   4
   5  -1  25 1314.38 506.156   4
   5  -1  26 1364.63 615.454   1
   5   1  26 941.513 529.329   4
   5  -1  26 1319.25 470.103   4
   5   1  27 481.099 345.551   1
   5  -1  27-48.9156 336.921   1
   5   1  27 46.6313 272.676   4
   5  -1  27 180.795 287.458   4
   5  -1  28 88.5769 385.781   1
   5   1  28-169.691 242.073   1
   5  -1  28 94.8298 191.540   4
   5   1  28 236.982 404.848   4
   5   1  29 1105.27 516.870   1
   5  -1  29 1830.61 762.584   1
   5  -1  29 1731.71 590.650   4
   5   1  29 2105.40 789.412   4
   5   1  30-181.946 244.341   1
   5  -1  30-315.693 361.894   1
   5  -1  30 441.913 324.611   4
   5   1  30 667.622 477.435   4
   5   1  31 303.779 295.100   1
   5  -1  31 1786.48 723.463   1
   5  -1  31 950.198 466.200   4
   5   1  31 1179.17 617.125   4
   5   1  32 2983.30 868.707   1
   5  -1  32 4181.00 1176.72   1
   5  -1  32 2900.27 797.598   4
   5   1  32 2445.98 913.708   4
   5  -1  33-338.614 345.572   1
   5   1  33-875.326 558.848   4
   5  -1  34 232.116 310.830   1
   5   1  34 999.570 602.555   4
   5  -1  35 179.873 383.285   1
   5   1  35-220.103 337.876   4
   5  -1  36 389.038 362.581   1
   5   1  36-397.345 413.197   4
   5   1  37 562.875 466.168   4
  -5   2  37 3395.05 1344.81   5
  -5   2  36 1090.47 769.600   5
  -5  -2  35-156.810 495.127   5
  -5   2  35-615.806 561.069   5
  -5  -2  34 2102.34 1163.35   5
  -5   2  34 1573.81 1003.98   5
  -5  -2  33 4551.90 1639.78   5
  -5   2  33 4221.44 1424.84   5
  -5  -2  32 841.276 728.456   5
  -5   2  32 1094.99 744.754   5
  -5  -2  31 222.981 481.194   5
  -5   2  31-3.77623 341.587   5
  -5  -2  30 155.993 426.089   5
  -5   2  30 47.0590 181.126   5
  -5  -2  29 621.220 618.732   5
  -5   2  29 86.6970 270.017   5
  -5  -2  28 3871.18 1416.83   5
  -5   2  28 3495.99 1181.86   5
  -5  -2  27 1690.82 939.783   5
  -5   2  27-73.3551 283.007   5
  -5  -2  26 808.358 710.906   5
  -5   2  26 740.909 549.679   5
  -5   2  25 3488.45 916.939   3
  -5  -2  25 3242.83 1179.82   5
  -5   2  25 3725.33 1184.14   5
  -5   2  24 2306.18 761.137   3
  -5  -2  24 3077.53 1195.09   5
  -5   2  24 3188.97 1032.51   5
  -5   2  23 2552.77 758.483   3
  -5  -2  23 2469.67 1045.14   5
  -5   2  23 2657.52 895.481   5
  -5  -2  22 7932.21 1864.77   5
  -5   2  22 8012.25 1596.74   5
  -5   2  22 9655.02 1439.75   3
  -5   2  21 716.068 385.666   3
   5  -2 -21 509.069 133.433   1
   5   2 -21 597.215 395.240   1
  -5  -2  21 1369.07 782.725   5
  -5   2  21-436.565 423.000   5
   5   2 -20 9923.96 1516.52   1
   5  -2 -20 9866.58 668.628   1
  -5  -2  20 10177.3 2053.48   5
  -5   2  20 9536.99 1622.70   5
  -5   2  20 10148.6 1437.03   3
   5  -2 -19 146.941 104.759   1
   5   2 -19-282.338 288.582   1
  -5  -2  19-120.643 593.538   5
  -5   2  19 412.908 251.056   5
  -5   2  19 541.947 323.933   3
  -5  -2  19 135.282 78.1191   3
   5   2 -18 470.598 325.329   1
  -5  -2  18 274.786 665.479   5
  -5   2  18 273.013 314.213   5
  -5   2  18-53.2355 188.133   3
  -5  -2  17 27035.6 3173.62   5
  -5   2  17 29300.9 2634.92   5
   5  -2 -17 30731.2 2570.75   4
  -5   2  17 28014.9 2296.58   3
  -5  -2  16 5572.16 1411.57   5
   5  -2 -16 6682.92 1186.22   4
  -5   2  16 5810.94 1037.68   3
   5   2 -15 2425.53 881.971   5
  -5  -2  15 1783.31 765.033   5
   5  -2 -15 2653.43 739.175   4
   5   2 -14 1331.77 631.228   5
  -5  -2  14 863.263 599.381   5
   5  -2 -14 1908.17 609.010   4
   5  -2 -13 2843.25 664.229   3
  -5  -2  13 3067.48 995.159   5
  -5   2  13 2019.39 636.640   5
   5   2 -13 2879.54 883.787   5
   5  -2 -13 2125.09 622.475   4
   5   2 -12 23149.7 2084.80   2
   5   2 -12 21716.1 2463.01   5
  -5  -2  12 23142.5 2710.75   5
  -5   2  12 23427.9 2093.23   5
   5  -2 -12 24263.8 1989.96   4
   5  -2 -12 23931.5 1888.44   3
   5   2 -11 20527.6 1940.68   2
   5   2 -11 22130.1 2473.90   5
  -5   2  11 20260.1 1894.87   5
  -5  -2  11 20441.4 2507.97   5
   5  -2 -11 19325.7 1713.01   3
   5  -2 -11 20245.1 1756.40   4
   5  -2 -10 3611.94 758.550   3
   5   2 -10 3778.73 855.523   2
   5   2 -10 3590.40 997.197   5
  -5   2  10 3562.91 769.971   5
   5  -2 -10 3989.98 763.308   4
   5  -2  -9 1163.31 448.602   3
   5   2  -9 884.587 365.541   2
   5   2  -9 643.451 459.244   5
   5  -2  -9 1964.14 497.774   5
  -5   2   9 928.225 403.398   5
   5  -2  -9 1614.83 467.923   4
   5   2  -8 19228.1 1802.35   2
   5  -2  -8 19693.9 1465.39   5
   5   2  -8 18533.5 2273.20   5
  -5   2   8 18966.5 1639.48   5
   5  -2  -8 18590.7 1518.31   4
   5  -2  -8 19835.3 1727.50   3
  -5   2   7 7700.24 997.617   5
   5   2  -7 7255.33 1416.04   5
   5  -2  -7 8065.72 910.208   5
   5  -2  -7 8180.67 977.570   4
   5  -2  -7 8101.59 1100.95   3
   5  -2  -6 25140.3 1556.98   5
   5   2  -6 27111.5 2708.65   5
  -5   2   6 23709.1 1701.80   5
   5  -2  -6 26606.0 1680.80   4
   5   2  -6 25772.2 1175.84   3
   5  -2  -6 25402.1 1960.93   3
   5   2  -5 801.163 224.037   3
   5  -2  -5 805.660 295.629   2
   5  -2  -5 723.363 270.368   5
   5   2  -5 131.858 258.269   5
  -5   2   5 796.714 294.262   5
   5  -2  -5 574.974 322.634   3
   5  -2  -5 1065.15 329.545   4
   5  -2  -4 9425.85 1014.25   2
   5  -2  -4 8681.59 882.889   5
   5   2  -4 8934.32 1548.46   5
  -5   2   4 7980.05 883.432   5
   5  -2  -4 8689.55 881.674   4
   5   2  -4 9094.50 795.075   3
   5  -2  -3 3998.10 658.375   2
  -5  -2   3 3052.18 693.699   2
   5   2  -3 4062.38 1054.81   5
   5  -2  -3 3491.81 561.104   5
   5   2  -3 3067.86 487.620   3
   5  -2  -3 4092.93 580.416   4
   5  -2  -2 7001.51 839.274   2
  -5  -2   2 6576.34 1030.97   2
   5   2  -2 6045.81 1273.81   5
   5  -2  -2 6147.04 744.811   5
   5  -2  -2 7171.50 729.556   4
   5   2  -2 7283.95 775.668   3
  -5  -2   1 45234.8 2692.27   2
   5  -2  -1 42299.9 2025.69   2
   5  -2  -1 41807.9 1977.45   5
   5   2  -1 40399.4 3283.85   5
   5  -2  -1 43932.6 1699.52   4
  -5  -2   0 610.061 343.900   2
   5  -2   0-9.38065 139.559   2
   5  -2   0 314.226 193.961   5
   5   2   0-31.6245 229.741   5
   5  -2   0 364.183 182.211   4
  -5  -2  -1 2710.18 664.671   2
   5  -2   1 2270.84 463.542   2
   5  -2   1 1978.55 416.428   5
   5   2   1 2229.94 788.485   5
   5  -2   1 2353.21 368.888   4
  -5  -2  -2 18927.7 1773.97   2
   5  -2   2 19856.6 1373.66   2
   5  -2   2 19190.7 1449.47   5
   5   2   2 19741.0 2295.43   5
   5  -2   2 19019.3 902.934   4
  -5  -2  -3 887.750 436.983   2
  -5   2  -3 812.188 282.505   2
   5   2   3 875.010 420.474   2
   5  -2   3 1366.18 393.768   2
   5   2   3 1297.47 590.036   5
   5  -2   3 1105.47 367.423   5
   5  -2   3 1350.67 226.155   4
  -5   2  -4 7446.86 862.582   2
  -5  -2  -4 7168.88 1122.03   2
   5  -2   4 6365.84 795.348   2
   5   2   4 6672.74 1090.38   2
   5  -2   4 7394.31 923.930   5
   5  -2   4 7136.78 447.547   4
   5   2   4 5961.61 1267.49   5
   5   2   5 1706.42 597.850   2
   5  -2   5 1922.64 454.258   2
  -5   2  -5 1885.27 445.155   2
  -5  -2  -5 1439.18 541.439   2
   5   2   5 1688.38 681.770   5
   5  -2   5 2066.90 213.416   4
  -5   2  -6 19867.6 1455.84   2
  -5  -2  -6 19135.2 1887.27   2
   5  -2   6 18638.3 1415.27   2
   5   2   6 20579.4 1939.65   2
   5   2   6 17231.8 2160.54   5
   5   2   7 5880.48 1056.82   2
   5  -2   7 6106.13 827.215   2
  -5   2  -7 7099.49 890.531   2
  -5  -2  -7 6415.01 1108.31   2
   5   2   7 7948.68 1493.38   5
   5   2   8 15611.3 1753.48   2
  -5   2  -8 17788.4 1446.70   2
  -5  -2  -8 20190.9 2005.80   2
   5  -2   8 17069.3 1434.35   2
   5  -2   9 8650.18 1057.44   2
  -5  -2  -9 8429.49 1316.97   2
   5   2   9 8227.10 1296.30   2
  -5   2  -9 8273.38 1015.27   2
   5  -2  10 965.794 480.949   1
   5   2  10 1186.06 582.621   2
   5  -2  10 1374.50 435.362   2
  -5   2 -10 1836.14 501.082   2
  -5  -2 -10 1208.21 529.120   2
   5   2  11 3550.60 904.343   2
   5  -2  11 4311.34 977.054   1
   5  -2  11 3406.89 706.015   2
  -5  -2 -11 3979.08 945.572   2
  -5   2 -11 3615.07 716.325   2
   5  -2  12 11634.9 1524.31   1
   5  -2  12 11105.9 1263.83   2
  -5   2 -12 12690.0 1374.56   2
  -5  -2 -12 10208.9 1536.84   2
   5   2  12 10783.1 1572.45   2
   5  -2  13 727.510 438.355   1
   5   2  13 116.409 350.812   2
  -5   2 -13 630.787 327.654   2
  -5  -2 -13 1020.49 558.097   2
   5  -2  14 2557.75 764.055   1
   5   2  14 2223.68 807.124   2
  -5   2 -14 2522.73 645.887   2
   5   2  14 2320.84 764.942   4
   5   2  15 7820.86 1416.42   2
   5  -2  15 8266.00 1336.40   1
  -5   2 -15 7708.32 1182.49   2
   5   2  15 6790.42 1257.00   4
   5  -2  16 1021.16 510.087   1
   5   2  16 646.000 397.194   2
  -5   2 -16 1536.87 542.622   2
   5   2  16 993.421 634.659   4
   5  -2  17 738.661 545.227   1
   5   2  17 1724.95 744.340   2
  -5   2 -17 589.765 365.043   2
   5   2  17 756.915 485.515   4
   5  -2  18 3524.19 981.257   1
   5   2  18 2047.33 766.878   2
  -5   2 -18 3895.73 906.837   2
   5   2  18 3118.24 924.747   4
   5   2  19 1737.16 746.275   2
   5  -2  19 2622.85 879.255   1
  -5   2 -19 2498.66 734.911   2
   5   2  19 1746.39 758.584   4
   5  -2  20 9093.19 1565.54   1
  -5   2 -20 7652.30 1327.22   2
   5   2  20 8821.52 1536.30   4
  -5   2 -21 498.617 352.550   2
   5  -2  21 657.404 467.499   1
   5   2  21 18.5227 457.318   4
   5  -2  22 14643.1 2040.03   1
   5   2  22 15528.2 2115.84   4
   5  -2  23 6445.09 1360.16   1
   5   2  23 5046.45 1224.53   4
   5  -2  24 3112.42 963.285   1
   5   2  24 2523.02 883.401   4
   5  -2  25 38.7197 258.786   1
   5   2  25 480.423 436.957   4
   5  -2  26 1287.86 654.789   1
   5   2  26 1610.02 723.640   4
   5  -2  27 385.898 395.906   1
   5   2  27 220.936 313.156   4
   5  -2  28 2820.05 961.497   1
   5   2  28 2231.72 910.124   4
   5   2  29 100.517 205.778   1
   5   2  29 673.211 547.598   4
   5  -2  30 1029.85 679.885   1
   5   2  30 1399.92 710.861   4
   5  -2  31-106.912 192.980   1
   5   2  31 427.582 427.041   4
   5  -2  32 206.360 405.021   1
   5  -2  32 285.527 350.851   5
   5   2  32 648.517 672.727   4
   5  -2  33-1101.58 681.109   1
   5  -2  33-696.256 622.882   5
   5   2  33-528.485 513.307   4
   5  -2  34 253.328 309.668   1
   5  -2  34-182.940 445.578   5
   5   2  34-551.388 551.883   4
   5  -2  35 336.927 490.545   1
   5  -2  35 593.013 585.419   5
   5  -2  36 228.465 497.415   1
   5  -2  37 733.624 547.914   1
  -5   3  37-76.8218 556.148   5
  -5   3  36 92.3858 248.136   5
  -5   3  35 1145.41 851.813   5
  -5   3  34-254.869 397.818   5
  -5  -3  33 2716.87 1292.53   5
  -5   3  33 958.011 674.993   5
  -5  -3  32-785.583 729.662   5
  -5   3  32 215.000 325.174   5
  -5  -3  31-466.395 660.736   5
  -5   3  31 67.1465 382.750   5
  -5  -3  30 211.558 355.684   5
  -5   3  30 539.234 478.527   5
  -5  -3  29 737.541 756.694   5
  -5   3  29 870.958 611.370   5
  -5  -3  28 1974.70 1043.18   5
  -5   3  28 365.530 423.780   5
  -5  -3  27 774.245 690.800   5
  -5   3  27-271.041 364.542   5
  -5  -3  26-433.483 651.346   5
  -5   3  26-492.147 440.241   5
  -5  -3  25-1150.25 822.414   5
  -5   3  25-366.492 441.525   5
  -5  -3  25 681.879 258.479   3
  -5  -3  24-686.980 639.342   5
  -5   3  24-883.759 550.595   5
  -5  -3  24 131.766 139.765   3
  -5   3  23-242.318 278.586   5
  -5  -3  23-59.1172 110.837   3
  -5   3  22 3829.13 1062.38   5
  -5  -3  22 4005.47 558.040   3
  -5   3  21 20557.2 2354.95   5
  -5  -3  21 18317.1 2870.85   5
  -5  -3  21 18981.6 1174.41   3
  -5  -3  20 780.004 240.897   3
  -5  -3  20 2001.83 1089.63   5
  -5   3  20 1791.91 686.150   5
  -5  -3  19 125.128 131.041   3
   5  -3 -19 270.442 133.154   1
  -5   3  19 578.758 405.709   5
  -5  -3  19 518.926 570.878   5
   5  -3 -18 11444.1 861.343   1
  -5   3  18 10770.7 1625.72   5
  -5  -3  18 11792.9 2255.50   5
  -5  -3  18 11667.2 852.487   3
   5   3 -17 5091.17 1079.69   2
   5  -3 -17 5278.56 655.964   1
  -5  -3  17 6286.42 1616.49   5
  -5  -3  17 4958.24 542.764   3
   5   3 -16 4073.30 999.040   2
   5  -3 -16 3855.76 605.962   1
  -5  -3  16 2702.81 1086.52   5
  -5  -3  16 3279.19 437.033   3
   5   3 -15-62.8683 365.975   2
   5  -3 -15 333.057 200.417   1
  -5  -3  15 476.704 522.118   5
   5  -3 -15 258.532 263.561   4
   5   3 -14 7026.18 1247.28   2
   5  -3 -14 7026.08 882.872   1
  -5   3  14 7017.26 1162.65   5
  -5  -3  14 9101.73 1838.32   5
   5  -3 -14 7313.85 1238.49   3
   5  -3 -14 6262.84 1151.17   4
   5   3 -13 78695.8 4021.01   2
   5  -3 -13 81301.0 3029.32   1
  -5   3  13 78408.8 3666.49   5
  -5  -3  13 77032.0 5309.59   5
   5  -3 -13 79206.0 3954.96   4
   5  -3 -13 84326.1 4121.91   3
   5   3 -12 16872.6 1880.17   2
   5  -3 -12 15401.6 1361.06   1
  -5   3  12 14954.6 1560.85   5
  -5  -3  12 16135.7 2421.80   5
   5  -3 -12 13654.6 1605.24   4
   5  -3 -12 13677.1 1678.22   3
   5   3 -11 13346.8 1624.28   2
   5  -3 -11 13908.7 1338.99   1
  -5   3  11 12377.1 1342.49   5
   5   3 -11 12344.9 1978.76   5
  -5  -3  11 12752.3 2141.30   5
   5  -3 -11 13365.8 1661.10   3
   5  -3 -11 12092.4 1461.20   4
   5   3 -10 7699.82 1216.90   2
   5  -3 -10 7394.24 988.881   1
   5   3 -10 8719.32 1649.52   5
  -5   3  10 7609.16 998.047   5
  -5  -3  10 6865.68 1521.19   5
   5  -3 -10 8156.35 1170.05   4
   5  -3 -10 7737.88 1272.47   3
   5   3  -9 9808.74 1358.40   2
   5  -3  -9 9024.40 1116.00   1
   5   3  -9 10727.9 1843.64   5
  -5   3   9 8879.31 1002.93   5
  -5  -3   9 8969.97 1723.51   5
   5  -3  -9 8202.36 1125.42   4
   5  -3  -9 7946.98 1299.12   3
   5   3  -8-40.4180 327.940   2
   5  -3  -8 182.938 312.439   3
   5  -3  -8 106.667 152.249   1
  -5  -3   8 635.050 608.566   5
   5   3  -8 217.500 390.890   5
  -5   3   8 692.240 272.098   5
   5  -3  -8 526.307 297.101   4
   5  -3  -7 2566.34 738.577   3
   5   3  -7 3209.91 795.482   2
   5  -3  -7 2709.68 632.369   1
  -5   3   7 2656.34 471.743   5
   5   3  -7 2122.24 777.894   5
  -5  -3   7 1521.51 776.810   5
   5  -3  -7 2318.20 561.954   4
   5  -3  -6 494.702 267.953   3
   5  -3  -6 811.449 308.558   2
   5   3  -6-4.55102 369.954   2
   5  -3  -6 1358.12 517.445   1
   5   3  -6 1518.34 720.867   5
  -5  -3   6 275.708 430.628   5
  -5   3   6 839.707 236.350   5
   5  -3  -6 1059.50 351.517   4
   5  -3  -5 4477.85 971.929   3
   5  -3  -5 3501.36 604.576   2
   5   3  -5 3033.50 754.576   2
   5  -3  -5 3417.52 749.413   1
   5   3  -5 3453.00 1051.06   5
  -5  -3   5 2469.82 779.048   5
   5  -3  -5 2835.20 562.637   4
   5  -3  -4 3671.22 591.791   2
   5   3  -4 2995.32 745.180   2
   5  -3  -4 4284.22 849.459   1
   5   3  -4 3608.64 1120.08   5
  -5  -3   4 2826.61 934.105   5
   5   3  -4 3598.36 656.384   3
   5  -3  -4 3546.82 609.381   4
   5  -3  -4 3391.78 830.331   3
   5  -3  -3 15448.2 1157.92   2
   5   3  -3 15433.4 1663.05   2
   5  -3  -3 16509.7 1652.07   1
   5   3  -3 13920.2 2148.44   5
  -5  -3   3 15716.0 2117.00   5
   5  -3  -3 14658.2 1176.58   4
   5  -3  -3 13685.0 1710.70   3
   5   3  -3 14353.4 1326.41   3
   5   3  -2 174.038 179.923   3
   5  -3  -2-64.3865 119.102   2
  -5  -3   2-302.683 264.622   2
   5   3  -2-178.658 250.784   2
   5  -3  -2 233.089 339.069   1
   5   3  -2-677.517 507.909   5
   5  -3  -2-29.1147 74.4632   4
   5  -3  -2-383.222 355.386   3
   5   3  -1 64.7248 138.369   3
   5  -3  -1 101.214 104.575   2
  -5  -3   1-165.414 216.508   2
   5  -3  -1-201.837 237.840   1
   5  -3  -1 192.443 149.980   4
   5   3   0 278.732 214.813   3
   5   3   0-51.6009 363.967   2
   5  -3   0-289.293 162.584   2
  -5  -3   0-78.2885 263.451   2
   5  -3   0 3.01013 178.620   1
   5  -3   0 153.260 120.030   4
  -5  -3  -1 7117.06 1156.41   2
   5   3   1 6646.47 1117.33   2
   5  -3   1 6082.20 660.022   2
   5  -3   1 6289.36 1063.60   1
   5   3   1 6457.87 1468.09   5
   5   3   1 7617.39 1057.55   3
  -5  -3  -2 9584.79 1353.61   2
   5   3   2 9724.49 1371.93   2
   5  -3   2 10288.1 847.560   2
   5  -3   2 11139.4 1484.53   1
   5   3   2 10843.7 1898.53   5
   5   3   2 10004.3 1239.00   3
   5  -3   3 29156.2 1444.13   2
  -5  -3  -3 29754.2 2402.99   2
   5   3   3 31406.4 2472.66   2
   5  -3   3 33968.0 2565.01   1
   5   3   3 32629.2 3279.25   5
   5   3   3 30221.9 2194.23   3
   5  -3   4 46373.8 1833.08   2
  -5  -3  -4 45582.3 3012.68   2
   5   3   4 43775.6 2958.68   2
   5  -3   4 47967.9 3093.60   1
   5  -3   4 46074.8 1600.21   5
   5   3   4 48236.7 4003.13   5
   5   3   4 45050.8 2717.85   3
   5   3   5 990.306 431.224   3
  -5  -3  -5 547.490 365.670   2
   5   3   5 884.318 489.661   2
   5  -3   5 171.231 162.642   2
   5  -3   5 1755.18 663.791   1
   5   3   5 523.683 388.314   5
   5  -3   5 632.389 241.419   5
   5   3   6 203.660 214.465   3
  -5  -3  -6 89.4846 245.947   2
   5   3   6-148.462 351.433   2
   5  -3   6-18.8103 144.537   2
   5  -3   6 137.612 227.244   1
   5   3   6 331.490 351.873   5
   5  -3   6 219.868 151.872   5
   5   3   7-537.552 421.736   2
   5  -3   7 639.651 420.417   1
   5  -3   7-75.0356 122.167   2
  -5   3  -7-434.909 202.178   2
  -5  -3  -7 101.273 214.344   2
   5   3   7-260.216 353.596   5
   5   3   8 12420.1 1662.96   2
  -5   3  -8 16189.4 1200.39   2
  -5  -3  -8 15845.9 1869.32   2
   5   3   8 15790.3 2318.28   5
   5  -3   8 16187.9 1922.73   1
   5  -3   9 13710.0 1783.21   1
  -5   3  -9 13632.4 1144.36   2
   5   3   9 15247.0 1849.18   2
  -5  -3  -9 14032.1 1800.07   2
   5   3  10 5109.73 1095.01   2
   5  -3  10 4880.55 1135.61   1
  -5   3 -10 4924.11 721.797   2
   5  -3  11 1603.85 666.941   1
   5   3  11 633.113 537.648   2
  -5   3 -11 1009.15 375.633   2
   5  -3  12 40920.8 3204.48   1
  -5   3 -12 36580.2 2111.08   2
   5   3  12 39184.9 3158.36   2
   5  -3  13 32905.3 2942.52   1
   5   3  13 30756.2 2850.27   2
  -5   3 -13 32436.7 2046.95   2
   5  -3  14 16217.9 2101.31   1
   5   3  14 14778.9 1984.24   2
  -5   3 -14 15083.8 1457.51   2
   5   3  14 16053.6 2112.37   4
   5   3  15 1131.71 660.427   2
   5  -3  15 2207.91 814.176   1
  -5   3 -15 2392.93 598.043   2
   5   3  15 2677.85 901.081   4
   5   3  16 1461.17 665.849   2
   5  -3  16 1603.05 694.033   1
  -5   3 -16 1444.74 477.675   2
   5   3  16 1839.40 752.635   4
   5   3  17 572.310 452.521   2
   5  -3  17-229.244 357.841   1
  -5   3 -17 23.3494 250.740   2
   5   3  17 928.789 566.687   4
  -5   3 -18 1412.51 514.212   2
   5   3  18 2169.32 810.154   2
   5  -3  18 1253.05 667.284   1
   5  -3  18 833.916 462.182   5
   5   3  18 736.773 589.360   4
  -5   3 -19 12858.6 1576.60   2
   5  -3  19 13650.0 2055.36   1
   5  -3  19 12003.0 1678.92   5
   5   3  19 14370.6 2096.92   4
  -5   3 -20 1487.81 557.620   2
   5  -3  20 2028.07 864.930   1
   5  -3  20 1481.45 679.642   5
   5   3  20 2259.26 882.253   4
  -5   3 -21 1519.76 583.853   2
   5  -3  21 937.897 585.841   1
   5  -3  21 613.056 431.858   5
   5   3  21 222.440 433.569   4
  -5   3 -22-25.6767 215.312   2
   5  -3  22 5.63353 179.210   1
   5  -3  22 389.171 393.188   5
   5   3  22 158.319 360.907   4
   5  -3  23 6966.03 1532.33   1
   5  -3  23 6990.21 1394.41   5
   5   3  23 7578.71 1607.53   4
   5  -3  24 756.445 723.787   1
   5  -3  24 519.128 455.965   5
   5   3  24-242.423 408.859   4
   5  -3  25 303.131 433.201   1
   5  -3  25 412.073 399.126   5
   5   3  25 406.384 481.425   4
   5  -3  26 1447.49 746.001   1
   5  -3  26 1802.39 779.518   5
   5   3  26 761.732 391.911   4
   5  -3  27 380.851 459.622   1
   5  -3  27-804.916 603.962   5
   5   3  27-68.8366 238.147   4
   5  -3  28 740.664 616.613   1
   5  -3  28 1551.22 644.247   5
   5   3  28 67.2959 301.610   4
   5  -3  29-395.481 465.361   1
   5  -3  29 554.169 466.389   5
   5   3  29 292.323 400.198   4
   5  -3  30 503.828 533.685   1
   5  -3  30 1243.15 705.480   5
   5   3  30-167.951 367.255   4
   5  -3  31-338.027 519.883   1
   5  -3  31 384.800 438.701   5
   5   3  31-749.042 567.708   4
   5  -3  32-326.474 461.827   5
   5  -3  32 625.238 594.316   1
   5  -3  33-54.9739 344.395   5
   5  -3  33 689.041 579.969   1
   5  -3  34-303.701 440.423   5
   5  -3  35-222.716 377.685   5
  -5   4  35-39.6287 392.626   5
  -5   4  34-507.319 503.123   5
  -5   4  33 616.331 567.396   5
  -5   4  32-594.399 568.201   5
  -5   4  31 481.342 457.336   5
  -5  -4  31 2947.07 1414.98   5
  -5   4  30-173.420 367.068   5
  -5  -4  30-1951.78 1158.51   5
  -5   4  29-60.8167 155.964   5
  -5  -4  29 1370.74 965.184   5
  -5   4  28-473.518 441.490   5
  -5  -4  28 293.183 507.968   5
  -5   4  27 1128.51 637.577   5
  -5  -4  27-438.305 611.395   5
  -5   4  26-529.722 436.539   5
  -5  -4  26-605.637 736.361   5
   5   4 -25 1051.90 603.712   2
  -5   4  25 591.479 449.467   5
  -5  -4  25 546.122 712.988   5
   5   4 -24-468.364 442.897   2
  -5  -4  24-1062.35 855.853   5
  -5   4  24 108.272 185.412   5
   5   4 -23 1038.63 581.416   2
  -5  -4  23-502.720 598.689   5
  -5   4  23 341.866 339.964   5
   5   4 -22 971.621 550.804   2
  -5  -4  22-155.634 488.040   5
  -5   4  22-297.585 309.460   5
  -5  -4  21 4382.60 729.787   3
   5   4 -21 3982.66 1057.59   2
  -5   4  21 4719.75 1073.43   5
  -5  -4  20-258.534 189.288   3
   5   4 -20-723.930 484.298   2
  -5  -4  20-96.7604 391.451   5
  -5   4  20 440.131 330.644   5
  -5  -4  19 275.319 194.207   3
   5   4 -19 1169.21 575.354   2
  -5  -4  19 1737.53 780.756   5
  -5   4  19 1050.94 508.636   5
  -5  -4  18 1506.65 427.354   3
   5   4 -18 2049.60 741.245   2
  -5  -4  18 3092.59 1186.37   5
   5   4 -17 1380.93 631.845   2
  -5  -4  17 897.691 338.775   3
   5  -4 -17 1214.18 327.176   1
  -5  -4  17 1738.42 812.444   5
  -5   4  17 1703.82 667.577   4
   5   4 -16 2165.24 815.982   2
  -5  -4  16 2593.90 532.771   3
   5  -4 -16 2344.45 529.705   1
  -5   4  16 2248.03 654.865   5
  -5  -4  16 2725.23 1093.13   5
  -5   4  16 3169.94 844.535   4
   5   4 -15 1624.52 643.505   2
   5  -4 -15 1505.07 441.783   1
  -5   4  15 1476.90 535.138   5
  -5  -4  15 2554.62 1096.49   5
  -5   4  15 931.506 439.950   4
   5  -4 -14 874.016 513.845   3
   5   4 -14 434.255 368.318   2
   5  -4 -14 538.171 266.200   1
  -5  -4  14-662.533 635.027   5
  -5   4  14 740.374 348.467   5
  -5   4  14 546.452 368.534   4
   5  -4 -13 763.271 491.010   3
   5   4 -13 447.659 376.496   2
   5  -4 -13 939.779 387.690   1
  -5   4  13 261.757 206.746   5
  -5  -4  13 1541.10 883.117   5
   5  -4 -13 859.040 462.582   4
   5  -4 -12 1921.25 747.672   3
   5   4 -12 1490.21 525.601   2
   5  -4 -12 1492.95 455.297   1
  -5   4  12 2203.15 513.551   5
  -5  -4  12 294.685 476.096   5
   5  -4 -12 1415.37 593.475   4
   5  -4 -11 28.6051 245.841   3
   5   4 -11 128.660 242.896   2
   5  -4 -11 194.283 306.282   1
  -5  -4  11-191.688 762.780   5
  -5   4  11 284.732 181.714   5
   5  -4 -11 265.587 239.860   4
   5  -4 -10 5836.65 1219.90   3
   5   4 -10 6207.44 1130.27   2
   5  -4 -10 6610.04 1081.13   1
  -5   4  10 6214.87 617.389   5
  -5  -4  10 6031.21 1514.35   5
   5  -4 -10 6321.93 1114.18   4
   5  -4  -9 286.707 388.864   3
   5   4  -9-612.906 406.589   2
   5  -4  -9 92.3800 215.138   1
   5  -4  -9 65.9992 149.012   4
   5  -4  -8 10477.3 1401.22   1
   5   4  -8 10255.0 1442.53   2
  -5  -4   8 11425.6 2061.83   5
   5  -4  -8 9267.55 1283.55   4
   5  -4  -8 9633.83 1621.06   3
   5  -4  -7 2134.39 654.934   1
   5  -4  -7 1979.55 753.888   3
   5   4  -7 1987.90 607.828   2
   5  -4  -7 2123.69 456.622   2
  -5  -4   7 2827.26 1087.37   5
   5  -4  -6 1007.27 451.439   1
   5   4  -6 936.059 467.797   2
   5  -4  -6 1662.27 391.011   2
   5  -4  -6 2062.66 756.957   3
  -5  -4   6 1652.47 854.596   5
   5  -4  -5 2380.28 690.580   1
   5  -4  -5 2073.09 731.087   3
   5  -4  -5 2570.64 447.879   2
   5   4  -5 2334.18 727.508   2
  -5  -4   5 2641.80 989.132   5
   5  -4  -4 272.677 249.437   1
   5  -4  -4 486.024 424.962   3
   5   4  -4-285.635 337.860   2
   5  -4  -4 30.2421 70.3036   2
   5  -4  -3 3722.80 889.641   1
   5  -4  -3 3426.97 970.765   3
   5  -4  -3 3227.19 420.093   2
   5   4  -3 2488.73 731.667   2
   5  -4  -2-303.536 299.692   1
   5   4  -2-138.996 348.205   2
   5  -4  -2-28.5288 72.6912   2
   5  -4  -2-236.277 342.528   3
   5   4  -2 331.135 263.716   3
   5  -4  -1 5589.02 1143.16   1
   5  -4  -1 5370.44 381.235   2
   5   4  -1 4904.25 1035.32   2
  -5  -4   1 4657.20 967.241   2
   5  -4  -1 7339.76 1417.62   3
   5   4  -1 4739.12 956.502   3
   5   4   0 2112.36 649.077   2
   5  -4   0 3113.22 897.119   1
   5   4   0 3135.03 766.473   3
  -5  -4   0 2321.46 686.618   2
   5  -4   0 2178.49 758.543   3
   5  -4   1 13182.7 1762.51   1
  -5  -4  -1 11106.7 1521.06   2
   5   4   1 13257.3 1686.47   2
   5  -4   1 12259.3 1875.45   3
   5   4   1 11510.5 1532.72   3
   5   4   2 1139.94 530.111   2
   5  -4   2 706.498 333.012   1
  -5  -4  -2 1467.57 552.688   2
   5   4   2 1265.50 541.417   3
   5   4   3 2402.24 745.687   2
   5  -4   3 2847.56 903.683   1
   5   4   3 2527.28 753.676   3
  -5  -4  -3 2436.65 721.481   2
   5  -4   4 14047.5 1919.54   1
   5   4   4 12509.4 1676.40   2
  -5  -4  -4 12667.8 1673.32   2
   5   4   4 13859.3 1764.52   3
   5  -4   5 17523.9 2142.50   1
   5   4   5 17827.3 2055.53   2
  -5  -4  -5 17608.1 1999.10   2
   5   4   5 17013.5 1981.56   3
   5   4   6 13159.4 1767.72   2
   5  -4   6 16570.0 2113.54   1
   5   4   7 10294.9 1589.84   2
   5  -4   7 12975.5 1886.71   1
   5   4   8 2708.72 816.910   2
   5  -4   8 3065.95 966.614   1
   5  -4   9 777.809 229.357   5
   5   4   9 1293.24 610.845   2
   5  -4   9 573.748 467.851   1
   5  -4  10 6667.84 776.380   5
   5  -4  10 6197.22 1332.00   1
   5   4  10 6072.03 1289.63   2
   5  -4  11-171.435 140.824   5
   5  -4  11 276.022 481.405   1
  -5   4 -12 508.248 173.145   2
   5   4  12 378.290 358.878   2
   5  -4  12-1.07072 245.024   5
  -5   4 -13 1264.00 327.020   2
   5  -4  13 1333.79 694.907   1
   5   4  13 667.995 459.149   2
   5  -4  13 1036.65 393.010   5
   5   4  13 1031.19 553.197   4
  -5   4 -14 1220.02 351.761   2
   5  -4  14 1811.34 781.418   1
   5   4  14 2195.07 863.203   2
   5  -4  14 989.881 408.102   5
   5   4  14 955.511 635.506   4
   5  -4  15 4624.46 1237.68   1
   5   4  15 4099.68 1119.82   2
   5  -4  15 4177.62 828.320   5
   5   4  15 3713.94 1103.43   4
   5  -4  16-5.74619 298.257   1
   5   4  16 281.359 369.201   2
   5  -4  16 122.526 195.584   5
   5   4  16-579.964 519.768   4
   5  -4  17 766.374 563.577   1
   5   4  17 648.210 491.471   2
   5  -4  17 149.376 178.651   5
   5   4  17 363.872 378.138   4
   5  -4  18 68.1706 202.447   5
   5   4  18-99.0929 274.230   4
   5  -4  19-154.852 340.023   1
   5  -4  19 428.531 367.072   5
   5   4  19 381.203 468.190   4
   5  -4  20 72.9849 435.509   1
   5  -4  20-316.849 295.969   5
   5   4  20-724.440 591.079   4
   5  -4  21 4202.08 1276.67   1
   5  -4  21 2801.44 869.090   5
   5   4  21 3604.40 1186.14   4
   5  -4  22 385.709 451.016   1
   5  -4  22 265.199 320.320   5
   5   4  22 394.730 502.427   4
   5  -4  23 1131.74 698.286   1
   5  -4  23 776.688 610.167   5
   5   4  23 333.975 415.777   4
   5  -4  24-205.065 347.766   1
   5  -4  24 394.148 446.402   5
   5   4  24 186.031 390.835   4
   5  -4  25-337.646 469.146   1
   5  -4  25-774.931 537.882   5
   5   4  25 341.437 426.768   4
   5  -4  26 1272.00 745.509   1
   5  -4  26 739.325 561.229   5
   5   4  26 292.077 505.346   4
   5  -4  27 1111.29 743.120   1
   5   4  27 625.001 550.877   4
   5  -4  28 300.165 508.357   1
   5   5 -28-224.994 363.362   2
  -5  -5  28-1842.93 1149.61   5
   5   5 -27 778.768 565.574   2
  -5  -5  27 173.355 444.945   5
   5   5 -26 869.646 565.106   2
  -5  -5  26 473.801 587.899   5
   5   5 -25 634.336 452.736   2
  -5  -5  25-445.313 557.061   5
   5   5 -24-72.6485 225.354   2
  -5  -5  24 1445.11 955.999   5
   5   5 -23 1495.13 673.650   2
  -5  -5  23 422.440 634.763   5
   5   5 -22 1037.48 648.376   2
  -5   5  22 279.278 326.916   4
   5   5 -21 587.799 430.456   2
  -5  -5  21 200.969 530.052   5
  -5   5  21 209.086 304.278   4
   5   5 -20 394.845 362.511   2
  -5  -5  20 778.803 760.428   5
  -5   5  20 320.182 333.803   4
   5   5 -19 5143.08 1215.61   2
  -5  -5  19 4840.69 1653.51   5
  -5   5  19 6721.42 1322.39   4
   5   5 -18-81.3066 167.983   2
  -5  -5  18-83.7404 412.495   5
  -5   5  18 587.942 400.358   4
  -5  -5  17-182.972 220.456   3
   5   5 -17-531.049 379.711   2
  -5  -5  17-171.769 734.717   5
  -5   5  17-179.255 243.342   4
   5   5 -16 1453.62 604.235   2
  -5  -5  16 1945.42 1022.90   5
  -5   5  16-152.553 262.533   4
   5   5 -15 2533.05 784.531   2
  -5  -5  15 3686.09 1348.05   5
  -5   5  15 2686.33 772.452   4
   5  -5 -14 757.668 531.702   3
   5   5 -14 1767.82 691.017   2
  -5  -5  14 2039.29 984.715   5
  -5   5  14 1862.74 630.179   4
   5   5 -13 883.678 452.493   2
   5  -5 -13 1313.54 738.690   3
   5  -5 -13 1246.45 477.836   1
  -5  -5  13 956.139 716.265   5
  -5   5  13 1156.30 579.448   4
   5  -5 -12 929.517 424.073   1
   5   5 -12 312.492 297.748   2
   5  -5 -12 420.709 337.866   3
  -5  -5  12 502.390 553.190   5
  -5   5  12 186.293 212.523   4
   5  -5 -11 462.290 332.659   1
   5  -5 -11 480.247 659.559   3
   5   5 -11 875.390 468.393   2
  -5   5  11 1149.79 466.514   4
  -5  -5  11 1486.68 865.386   5
   5  -5 -10 3607.84 878.941   1
   5  -5 -10 2856.22 1084.42   3
   5   5 -10 2534.41 757.535   2
  -5  -5  10 3985.26 1322.47   5
  -5   5  10 3000.08 712.745   4
   5  -5  -9 433.896 337.735   1
   5  -5  -9-46.7279 302.842   3
   5  -5  -9-32.2129 100.107   2
   5   5  -9-130.911 220.442   2
  -5   5   9-4.19361 167.146   4
   5  -5  -8-469.752 344.665   1
   5   5  -8 324.265 310.027   2
   5  -5  -8-55.2547 258.353   3
  -5  -5   8 548.026 549.632   5
  -5   5   8-86.5964 204.013   4
   5  -5  -7 955.035 506.424   1
   5  -5  -7 1106.47 663.392   3
   5   5  -7 152.203 255.860   2
   5  -5  -6 157.531 262.119   1
   5   5  -6 750.959 427.641   2
   5  -5  -6 1169.76 569.649   3
   5  -5  -5 36.2536 182.638   1
   5   5  -5 61.5925 221.273   2
   5  -5  -5-370.919 447.261   3
   5  -5  -4 330.629 329.090   1
   5  -5  -4 199.831 453.840   3
   5   5  -4 821.605 465.514   2
   5   5  -3 235.282 308.538   2
   5  -5  -3-635.618 447.421   1
   5  -5  -3 682.736 537.786   3
   5   5  -2-615.103 431.673   2
   5  -5  -2-122.053 260.189   1
   5  -5  -2-11.3552 306.125   3
   5   5  -1 667.460 431.815   2
   5  -5  -1 318.136 285.117   1
   5  -5  -1 817.809 601.181   3
   5   5   0 372.197 369.268   2
   5  -5   0 1075.42 489.192   1
   5  -5   0 268.353 438.950   3
   5   5   1 1056.34 469.873   2
   5  -5   1 566.842 500.740   1
   5  -5   1 350.247 446.621   3
   5   5   2-738.892 449.903   2
   5  -5   2-168.771 336.801   1
   5  -5   2-265.431 428.872   3
   5   5   3 735.810 454.057   2
   5  -5   3 386.070 425.209   1
   5  -5   3 246.950 419.965   3
   5   5   4 778.860 431.336   2
   5  -5   4 1779.88 777.170   1
   5  -5   4 524.977 501.687   3
   5   5   5 352.956 350.326   2
   5  -5   5 1745.25 768.256   1
   5  -5   5 1545.33 836.542   3
   5   5   6 2844.38 912.375   2
   5  -5   6 3813.80 1107.82   1
   5  -5   6 3856.39 1208.87   3
   5   5   7 993.723 521.639   2
   5  -5   7 2402.05 903.306   1
   5   5   8 35.7491 236.296   2
   5  -5   8 140.068 327.695   1
   5   5   9 1571.41 662.137   2
   5  -5   9 2332.03 835.681   1
   5   5  10 748.813 554.434   2
   5  -5  10-357.623 421.694   1
   5   5  11-670.455 520.206   2
   5  -5  11 401.698 398.213   1
   5   5  11-474.751 559.974   4
   5   5  12-339.945 402.091   2
   5  -5  12 201.975 409.469   1
   5   5  12 19.4219 318.432   4
   5   5  13-419.682 447.093   2
   5  -5  13 25.3913 184.785   1
   5   5  13-973.337 691.194   4
   5   5  14 464.242 431.593   2
   5  -5  14 32.4343 353.597   1
   5   5  14-387.156 474.126   4
   5  -5  15 3468.93 1181.43   1
   5   5  15 2274.48 968.383   4
   5  -5  16-412.831 497.200   1
   5   5  16 998.341 689.509   4
   5  -5  17 4760.12 1390.04   1
   5   5  17 3165.70 1167.70   4
   5  -5  18 1802.00 876.642   1
   5   5  18 1525.44 834.199   4
   5  -5  19-285.341 436.756   1
   5   5  19 175.084 453.420   4
   5  -5  20-165.974 586.637   1
   5   5  20 101.745 372.005   4
   5  -5  21-184.779 499.058   1
   5   5  21 783.321 631.308   4
  -5  -6  24-1108.70 903.205   5
  -5  -6  23 2041.99 1211.00   5
  -5  -6  22 579.404 739.538   5
  -5   6  22-303.004 382.458   4
  -5  -6  21-1232.93 912.961   5
  -5   6  21 177.157 262.146   4
  -5  -6  20-164.401 320.890   5
  -5   6  20-95.8131 327.637   4
  -5  -6  19-265.464 420.091   5
  -5   6  19-387.822 390.708   4
  -5  -6  18 2453.84 1293.09   5
  -5   6  18 390.291 341.599   4
  -5  -6  17 548.707 610.754   5
  -5   6  17-208.533 289.538   4
  -5  -6  16-26.6821 168.596   5
  -5   6  16 377.147 363.592   4
  -5  -6  15 99.4921 307.872   5
  -5   6  15 438.742 349.811   4
  -5  -6  14 29.5543 328.943   5
  -5   6  14 336.059 322.378   4
  -5  -6  13 1748.43 959.951   5
  -5   6  13 352.491 315.061   4
   5  -6 -12-355.961 364.901   3
  -5   6  12 214.755 291.451   4
   5  -6 -11 285.640 402.921   3
  -5   6  11 910.476 467.846   4
   5   6 -10 79.1982 262.025   2
   5  -6 -10 178.731 461.341   3
  -5   6  10-142.796 232.668   4
   5  -6  -9-109.924 289.278   3
   5   6  -9-567.936 424.381   2
  -5   6   9 674.793 375.531   4
   5   6  -8 872.212 494.552   2
   5  -6  -8-990.656 635.895   3
   5   6  -7 919.609 493.242   2
   5  -6  -7 623.023 435.356   1
   5  -6  -7 309.061 409.101   3
   5   6  -6 917.295 472.652   2
   5  -6  -6 1102.05 595.006   1
   5  -6  -6-50.8018 220.583   3
   5  -6  -5-258.592 350.857   1
   5   6  -5-6.09240 161.370   2
   5   6  -4 559.558 377.736   2
   5  -6  -4 798.881 508.345   1
   5  -6  -4 763.188 620.387   3
   5   6  -3 1043.89 499.013   2
   5  -6  -3 1700.33 731.459   1
   5  -6  -3 1337.28 836.601   3
   5  -6  -2 397.828 431.088   1
   5   6  -2-151.690 272.775   2
   5  -6  -2 738.351 584.510   3
   5  -6  -1-739.811 543.050   1
   5   6  -1 186.701 279.155   2
   5  -6  -1-230.990 405.804   3
   5   6   0 563.922 394.314   2
   5  -6   0 923.483 552.922   1
   5  -6   0 477.787 532.073   3
   5   6   1 22.1668 177.091   2
   5  -6   1-114.058 289.816   1
   5  -6   1 508.116 528.863   3
   5   6   2 1127.38 591.732   2
   5  -6   2 421.729 446.019   1
   5  -6   2-217.090 318.890   3
   5   6   3 85.8992 237.954   2
   5  -6   3 1102.99 672.608   1
   5  -6   3 772.149 600.692   3
   5   6   4-183.104 238.520   2
   5  -6   4 159.043 328.738   1
   5  -6   4-365.602 480.700   3
   5   6   5 1287.24 622.697   2
   5  -6   5 1772.27 806.756   1
   5  -6   5 530.556 494.220   3
   5   6   6-155.495 324.452   2
   5  -6   6 389.420 448.101   1
   5  -6   6 373.298 486.835   3
   5   6   7 606.745 452.798   2
   5  -6   7 1002.55 673.349   1
   5  -6   7 22.3983 312.583   3
   5  -6   8-428.720 492.533   1
   5   6   8 107.562 297.371   2
   5   6   8 312.306 416.217   4
   5  -6   8-324.144 492.457   3
   5  -6   9 72.2455 414.111   1
   5   6   9-112.411 216.866   2
   5  -6   9 471.354 537.849   3
   5   6   9 916.249 718.936   4
   5  -6  10 595.964 555.927   1
   5   6  10 351.263 295.213   2
   5   6  10-786.619 676.936   4
   5  -6  10 363.994 503.890   3
   5  -6  11 231.875 413.286   3
   5   6  11-396.521 478.651   4
   5  -6  12 262.018 368.916   1
   5  -6  12-27.2722 247.374   3
   5   6  12 817.576 620.555   4
   5  -6  13 977.840 696.758   1
   5   6  13 753.956 610.745   4
   5  -6  13-1035.08 780.143   3
   5   6  14 358.872 593.728   4
   5  -6  14 51.7015 477.858   3
   5  -7   3-73.0233 260.072   1
  -6   0  36 89.6179 338.663   5
  -6   0  35 1562.23 929.256   5
  -6   0  34 2440.78 1188.37   5
  -6   0  33 606.553 587.779   5
  -6   0  32 2615.02 1181.26   5
  -6   0  31-987.857 725.120   5
  -6   0  30 123.868 440.229   5
  -6   0  29 399.695 442.556   5
  -6   0  28 9156.23 2116.78   5
  -6   0  27-19.7011 97.3972   3
  -6   0  27 631.188 692.336   5
   6   0 -27 97.8189 125.533   1
  -6   0  26 2004.61 504.636   3
  -6   0  26 3043.53 1146.91   5
   6   0 -26 1923.53 535.677   1
  -6   0  25 742.328 315.015   3
   6   0 -25 215.291 188.425   1
  -6   0  25 665.185 540.919   5
   6   0 -24 9903.38 1220.43   1
  -6   0  24 10340.9 2050.61   5
  -6   0  24 11777.1 1123.67   3
  -6   0  23 70.7260 283.388   5
  -6   0  23-5.96503 73.0718   3
  -6   0  22 433.231 448.881   5
  -6   0  22 444.701 206.763   3
  -6   0  21 589.389 502.708   5
  -6   0  20 12882.9 2156.98   5
  -6   0  19 809.353 582.294   5
   6   0 -18 25719.0 2623.61   5
  -6   0  18 26532.3 2989.98   5
   6   0 -17 11.0001 306.542   5
  -6   0  17 514.639 499.437   5
   6   0 -16 513.735 380.668   5
  -6   0  16 514.283 453.343   5
   6   0 -15 50.4507 261.990   5
  -6   0  15-823.067 551.920   5
   6   0 -14 2858.38 828.065   5
  -6   0  14 2660.25 900.213   5
   6   0 -13 56.6499 199.666   5
  -6   0  13-936.546 588.060   5
   6   0 -12 1876.33 714.596   5
  -6   0  12 3661.31 1085.68   5
  -6   0  11-798.632 520.062   5
   6   0 -11 64.8187 241.686   5
   6   0 -10 5898.57 1148.79   5
   6   0 -10 5353.74 516.357   3
   6   0  -9-81.0910 92.8244   3
   6   0  -9-320.376 316.868   5
   6   0  -8 231.367 266.153   5
   6   0  -8 14.3011 97.6636   3
   6   0  -7 34.7992 247.507   5
   6   0  -6 2937.77 798.068   5
   6   0  -5-560.288 380.707   5
   6   0  -4 3243.13 870.939   5
   6   0  -3-198.502 239.226   5
   6   0  -2 4997.72 1089.75   5
  -6   0   1-513.269 305.351   2
   6   0  -1-537.992 386.827   5
  -6   0   0 14348.1 1496.19   2
   6   0   0 12600.3 1401.17   2
   6   0   0 12347.5 1659.47   5
   6   0   1-38.4793 217.899   2
  -6   0  -1 124.781 142.876   2
  -6   0  -2 21117.9 1825.52   2
   6   0   2 20491.7 1781.02   2
   6   0   2 19965.9 2084.57   5
  -6   0  -3-156.045 213.071   2
   6   0   3-344.243 299.808   2
   6   0   3-76.7723 318.676   5
  -6   0  -4 1801.77 566.037   2
   6   0   4 1719.36 546.346   2
   6   0   4 1244.47 509.353   5
   6   0   5-178.452 379.532   2
  -6   0  -5 141.655 208.022   2
   6   0   5-118.936 235.410   5
   6   0   6 1267.71 475.052   2
  -6   0  -6 1701.69 563.633   2
   6   0   6 1137.75 504.192   5
   6   0   7-900.961 440.753   2
  -6   0  -7-422.389 297.685   2
   6   0   8 15727.2 1658.32   2
  -6   0  -8 15824.6 1713.17   2
   6   0   9-242.397 360.085   2
  -6   0  -9-128.984 301.970   2
   6   0  10 24670.4 2163.94   2
  -6   0 -10 27215.9 2331.90   2
   6   0  11-510.498 360.067   2
  -6   0 -11-503.589 351.166   2
  -6   0 -12 14117.2 1749.74   2
   6   0  12 22636.1 2191.35   2
   6   0  13-366.131 366.819   2
  -6   0 -13-137.346 203.809   2
   6   0  13-37.4323 191.688   4
   6   0  14 1384.06 571.956   2
  -6   0 -14 1317.53 570.903   2
   6   0  14 846.318 389.551   4
  -6   0 -15 28.3330 146.102   2
   6   0  15-262.220 274.767   4
   6   0  16 17373.2 2051.10   2
   6   0  16 16993.1 1736.58   4
   6   0  17 98.2224 286.930   2
   6   0  17-75.1411 211.057   4
   6   0  18 8761.22 1506.85   2
   6   0  18 8626.81 1260.44   4
   6   0  19 19.6823 333.062   2
   6   0  19-197.635 263.423   4
   6   0  20 237.050 256.219   4
   6   0  21 13.6773 235.799   4
   6   0  22 2674.90 749.455   4
   6   0  23 424.292 397.060   4
   6   0  24 5183.07 1134.94   1
   6   0  24 6145.47 1170.26   4
   6   0  25 161.165 275.095   1
   6   0  25 61.4095 196.446   4
   6   0  26 764.010 469.528   1
   6   0  26 1319.37 548.468   4
   6   0  27-216.339 290.786   1
   6   0  27 572.928 389.661   4
   6   0  28-132.076 262.462   1
   6   0  28-204.352 241.787   4
   6   0  29-163.615 242.520   1
   6   0  29 157.033 294.064   4
   6   0  30 668.272 518.502   1
   6   0  30 915.342 512.147   4
   6   0  31-224.566 310.259   1
   6   0  31 154.425 324.246   4
   6   0  32 1433.81 690.426   1
   6   0  32 2400.53 833.501   4
   6   0  33 150.743 242.184   1
   6   0  33-91.3032 205.651   4
   6   0  34 1726.54 726.148   1
   6   0  34 669.520 461.871   4
   6   0  35 97.9028 285.113   4
  -6   1  37 257.342 488.772   5
  -6   1  36 2448.08 1235.17   5
  -6   1  35 2267.60 1142.62   5
  -6  -1  35 5.36929 243.249   5
  -6   1  34 2189.77 1100.90   5
  -6  -1  34 223.944 473.869   5
  -6   1  33 495.796 683.640   5
  -6  -1  33-1389.80 894.577   5
  -6   1  32 1041.70 738.000   5
  -6  -1  32 2015.61 1092.45   5
  -6   1  31 1348.62 835.408   5
  -6  -1  31 997.938 748.325   5
  -6   1  30 1217.12 798.021   5
  -6  -1  30 114.126 385.901   5
  -6   1  29-151.738 352.826   5
  -6  -1  29 211.874 331.478   5
  -6   1  28 821.944 416.907   3
  -6   1  28 1804.02 885.097   5
  -6  -1  28 1511.98 867.379   5
  -6   1  27 800.200 391.853   3
  -6  -1  27 74.5564 349.514   5
  -6   1  27 86.8726 277.169   5
   6   1 -27-201.974 256.426   1
  -6  -1  26 144.134 102.267   3
  -6   1  26-57.4940 106.089   3
   6   1 -26 252.360 234.344   1
  -6   1  26 643.883 534.370   5
  -6  -1  26 217.059 360.242   5
   6   1 -25 4952.56 1012.05   1
   6  -1 -25 5504.58 735.453   1
  -6   1  25 5716.68 1486.46   5
  -6  -1  25 4397.50 1408.66   5
  -6  -1  25 4970.22 524.328   3
  -6   1  25 5057.45 937.406   3
   6   1 -24 571.969 269.080   1
   6  -1 -24 1171.57 345.374   1
  -6   1  24 874.008 624.335   5
  -6  -1  24 736.862 694.603   5
  -6  -1  24 684.921 175.706   3
  -6   1  24 576.843 279.899   3
   6   1 -23-363.870 267.758   1
  -6  -1  23 47.5186 209.132   5
  -6   1  23-40.7519 200.029   5
  -6   1  23-326.802 226.680   3
  -6   1  22 2096.12 874.657   5
  -6  -1  22 3037.03 1139.33   5
  -6   1  22 2227.29 581.072   3
  -6   1  21 2267.19 879.026   5
  -6  -1  21 1369.25 779.966   5
  -6   1  21 1195.56 414.405   3
  -6   1  20 10570.5 1855.66   5
  -6  -1  20 9251.27 1899.31   5
  -6   1  19 4973.73 1279.92   5
  -6  -1  19 4393.17 1304.48   5
   6  -1 -18 24.6922 267.110   5
  -6   1  18 449.627 425.324   5
  -6  -1  18-320.956 406.903   5
   6  -1 -17 997.652 502.895   5
  -6   1  17 125.984 296.683   5
  -6  -1  17 1648.43 801.760   5
   6  -1 -17 1315.30 533.669   4
   6  -1 -16 3675.30 917.931   5
  -6   1  16 3067.34 961.287   5
   6   1 -16 3108.92 967.379   5
  -6  -1  16 3110.58 1042.14   5
   6  -1 -16 3872.04 888.367   4
   6  -1 -15 1999.84 687.789   5
  -6   1  15 1942.53 843.481   5
   6   1 -15 2585.11 892.918   5
  -6  -1  15 1796.48 864.285   5
   6  -1 -15 2398.51 681.142   4
   6  -1 -14 29786.9 2498.98   5
   6   1 -14 29619.1 2903.29   5
  -6   1  14 28812.6 2780.93   5
  -6  -1  14 29928.7 3161.68   5
   6  -1 -14 30179.3 2305.94   4
  -6  -1  13 6653.95 1503.42   5
   6  -1 -13 6212.67 1135.49   5
   6   1 -13 6995.96 1419.63   5
   6  -1 -13 6601.54 1058.49   4
   6  -1 -13 6555.57 820.743   3
   6  -1 -12 2773.24 556.095   3
  -6  -1  12 3489.80 1060.90   5
   6  -1 -12 2732.08 752.018   5
   6   1 -12 3381.98 960.093   5
   6  -1 -12 2846.11 671.063   4
   6  -1 -11 1915.94 457.474   3
   6   1 -11 3114.61 966.805   5
  -6  -1  11 3174.71 1037.97   5
   6  -1 -11 2699.14 710.034   5
   6  -1 -11 2713.76 642.431   4
   6  -1 -10 8190.45 1240.60   5
   6   1 -10 7236.22 1416.74   5
   6  -1 -10 6953.90 875.083   3
   6  -1  -9 46595.6 2943.73   5
   6   1  -9 45676.9 3550.03   5
   6  -1  -9 46255.2 2257.74   3
   6  -1  -8-2.63699 259.282   2
   6   1  -8 342.031 257.457   5
   6  -1  -8-278.653 265.846   5
   6  -1  -8-35.7677 262.667   3
   6  -1  -7 1141.08 399.415   2
   6  -1  -7 932.486 424.836   5
  -6   1   7 1094.94 463.475   5
   6   1  -7 743.525 498.267   5
   6  -1  -7 1152.10 405.645   3
   6  -1  -6 40176.1 2443.84   2
   6  -1  -6 41350.4 2753.96   5
   6   1  -6 43669.0 3448.12   5
  -6   1   6 40144.9 2769.16   5
   6  -1  -5 1198.93 449.765   2
   6  -1  -5 1101.27 457.568   5
   6   1  -5 1809.41 720.680   5
  -6   1   5 903.706 392.017   5
   6  -1  -4 36153.9 2279.54   2
   6  -1  -4 38070.3 2638.92   5
   6   1  -4 34524.4 3040.08   5
  -6   1   4 35782.6 2509.49   5
   6  -1  -3 26085.5 1902.78   2
   6  -1  -3 24604.4 2124.35   5
   6   1  -3 22936.1 2477.54   5
  -6   1   3 23386.3 1986.14   5
  -6  -1   2 7441.06 1132.37   2
   6  -1  -2 5676.93 876.148   2
   6   1  -2 6284.50 1301.96   5
   6  -1  -2 6237.05 1077.04   5
   6  -1  -1 596.625 312.429   2
  -6  -1   1 485.651 315.731   2
   6  -1  -1 728.330 345.897   5
   6   1  -1-28.7323 220.885   5
  -6  -1   0 51765.0 2980.21   2
   6  -1   0 53811.5 2698.29   2
   6  -1   0 52203.7 3108.62   5
   6   1   0 51873.1 3681.55   5
  -6  -1  -1 739.075 377.256   2
   6  -1   1 965.317 413.483   2
  -6   1  -1 556.217 264.156   2
   6   1   1 895.095 325.772   5
   6  -1   1 339.139 278.668   5
  -6  -1  -2 3433.93 777.288   2
   6  -1   2 3711.82 696.771   2
  -6   1  -2 3930.29 750.305   2
   6   1   2 3152.66 918.725   5
   6  -1   2 3120.96 778.377   5
  -6  -1  -3 6026.94 1037.28   2
   6  -1   3 5107.13 873.784   2
  -6   1  -3 6787.61 993.470   2
   6   1   3 5277.68 1165.27   5
   6  -1   3 5101.77 968.288   5
  -6   1  -4 14455.0 1456.75   2
  -6  -1  -4 13712.0 1592.39   2
   6  -1   4 15103.1 1474.01   2
   6   1   4 12980.3 1835.11   5
   6  -1   4 12313.7 1508.42   5
  -6   1  -5 1427.11 485.988   2
  -6  -1  -5 711.016 385.621   2
   6  -1   5 901.227 375.821   2
   6   1   5 969.501 516.196   5
   6  -1   5 1124.47 464.456   5
   6  -1   6 4229.14 810.087   2
  -6  -1  -6 4744.86 976.969   2
  -6   1  -6 4144.64 805.838   2
   6   1   6 3674.58 997.328   5
   6  -1   7 786.808 389.516   2
  -6   1  -7 450.152 295.023   2
  -6  -1  -7 794.994 371.598   2
   6   1   7 921.748 480.622   5
   6  -1   8 841.545 354.218   2
  -6  -1  -8 625.071 359.060   2
  -6   1  -8 807.726 391.739   2
   6   1   9-408.108 360.683   2
   6  -1   9-165.980 269.699   2
  -6  -1  -9-143.177 209.846   2
  -6   1  -9-204.944 233.486   2
   6   1  10 1114.98 528.557   2
   6  -1  10 731.868 396.280   2
  -6   1 -10 1073.58 466.500   2
  -6  -1 -10 955.716 482.291   2
   6   1  11-641.688 437.592   2
   6  -1  11 117.018 315.829   2
  -6   1 -11 31.4898 151.906   2
  -6  -1 -11-68.5370 299.133   2
   6  -1  11-261.013 211.859   4
   6   1  12 2572.01 753.985   2
   6  -1  12 2924.27 769.775   2
  -6   1 -12 3258.14 811.713   2
  -6  -1 -12 3341.36 883.384   2
   6  -1  12 3115.11 573.112   4
   6   1  13 1129.50 525.810   2
   6  -1  13 2150.46 689.269   2
  -6   1 -13 2639.83 750.239   2
   6  -1  13 1605.07 436.980   4
   6  -1  14 15756.1 1783.73   2
  -6   1 -14 17912.9 1949.34   2
   6   1  14 17211.7 2045.68   2
   6   1  14 16344.7 1838.62   4
   6  -1  14 17697.8 1425.12   4
   6   1  15 682.574 499.566   2
   6  -1  15 1141.24 564.464   2
  -6   1 -15 448.340 394.347   2
   6   1  15 642.009 421.422   4
   6  -1  15 479.871 258.398   4
   6   1  16 5367.40 1181.96   2
   6  -1  16 5805.78 1142.33   2
  -6   1 -16 5535.68 1133.19   2
   6  -1  16 5927.54 867.163   4
   6   1  16 6159.67 1180.06   4
   6   1  17-521.158 443.003   2
   6  -1  17-992.254 532.133   2
  -6   1 -17-81.4115 182.147   2
   6  -1  17-193.155 200.010   4
   6   1  17-430.989 376.772   4
   6   1  18 1046.11 590.352   2
   6  -1  18 735.670 334.826   4
   6   1  18 464.268 450.725   4
   6  -1  19 1237.52 619.306   1
   6   1  19 317.862 305.902   2
   6  -1  19 902.720 381.677   4
   6   1  19 879.697 401.751   4
   6  -1  20 3615.27 961.046   1
   6   1  20 5058.71 1219.70   2
   6  -1  20 5055.54 863.189   4
   6   1  20 4257.70 1009.15   4
   6  -1  21 881.396 529.478   1
   6  -1  21 953.461 396.757   4
   6   1  21 784.901 536.711   4
   6  -1  22 16721.6 2084.96   1
   6   1  22 18869.3 2174.83   4
   6  -1  22 19611.5 1731.17   4
   6  -1  23 2342.96 792.823   1
   6  -1  23 1613.21 527.028   4
   6   1  23 1142.05 592.573   4
   6  -1  24 6440.38 1340.21   1
   6  -1  24 4332.44 841.136   4
   6   1  24 6705.09 1327.96   4
   6  -1  25 890.898 556.031   1
   6   1  25 67.4290 245.208   4
   6  -1  25 787.626 439.982   4
   6  -1  26-394.121 370.073   1
   6   1  26 76.6219 267.282   4
   6  -1  26-377.227 272.593   4
   6  -1  27 576.118 461.394   1
   6   1  27-159.816 272.887   4
   6  -1  27 523.361 337.285   4
   6   1  28 2801.03 815.301   1
   6  -1  28 3026.56 945.792   1
   6   1  28 1849.06 705.844   4
   6  -1  28 1165.52 469.937   4
   6   1  29 57.0799 214.577   1
   6  -1  29-362.380 364.868   1
   6   1  29 562.478 459.742   4
   6  -1  29 668.200 375.250   4
   6   1  30 3491.35 856.027   1
   6  -1  30 2627.18 999.986   1
   6  -1  30 3212.85 823.432   4
   6   1  30 3404.61 1094.80   4
   6   1  31 838.068 465.649   1
   6  -1  31 726.392 482.765   1
   6   1  31 1368.26 673.555   4
   6   1  32 323.529 282.056   1
   6  -1  32 458.756 488.323   1
   6  -1  33-612.151 471.862   1
   6   1  33-575.001 458.881   4
   6  -1  34-135.965 314.638   1
   6   1  34 496.370 457.432   4
   6  -1  35 3252.37 1087.87   1
   6   1  35-118.471 246.990   4
   6  -1  36 1208.14 805.154   1
   6   1  36 1148.43 653.665   4
  -6   2  37 255.965 455.576   5
  -6   2  36-1469.98 923.243   5
  -6   2  35-888.630 735.295   5
  -6  -2  34 11.1189 322.426   5
  -6   2  34-9.09699 203.160   5
  -6  -2  33 2826.61 1328.22   5
  -6   2  33 100.639 346.280   5
  -6  -2  32 1838.57 1094.69   5
  -6   2  32 1497.75 873.315   5
  -6  -2  31 1071.23 879.847   5
  -6   2  31 1443.41 827.385   5
  -6  -2  30 789.474 769.107   5
  -6   2  30 563.248 562.465   5
  -6  -2  29 353.944 564.716   5
  -6   2  29-359.807 405.768   5
  -6  -2  28 2510.25 1172.83   5
  -6   2  28 3477.77 1271.63   5
  -6   2  27 1728.15 853.564   5
  -6  -2  27 1644.43 967.064   5
  -6   2  26 13958.4 2337.69   5
  -6  -2  26 12847.5 2550.91   5
  -6   2  25 3766.35 1184.50   5
  -6  -2  25 5755.42 1729.87   5
  -6   2  25 3138.01 847.907   3
   6  -2 -24 3032.47 333.692   1
  -6   2  24 4461.48 1251.58   5
  -6  -2  24 6005.72 1687.64   5
  -6   2  24 3875.55 919.798   3
   6  -2 -23 328.347 132.371   1
  -6   2  23 265.381 394.150   5
  -6  -2  23 52.1997 347.912   5
  -6   2  23 218.924 244.828   3
  -6   2  22-102.149 332.970   5
  -6  -2  22-386.101 460.288   5
  -6   2  22-335.535 301.199   3
  -6   2  21 3476.93 1066.94   5
  -6  -2  21 3297.45 1307.79   5
  -6   2  20 23075.2 2664.45   5
  -6  -2  20 21502.2 3063.07   5
  -6   2  19-185.943 336.611   5
  -6  -2  19-150.761 386.383   5
  -6   2  18 1314.33 558.497   5
  -6  -2  18 2278.72 954.185   5
  -6   2  17 1337.55 691.289   5
  -6  -2  17 2121.66 948.340   5
  -6   2  16 25897.8 2618.45   5
  -6  -2  16 27282.1 3283.84   5
   6  -2 -16 29321.4 2498.49   4
   6   2 -15 403.557 405.647   2
  -6  -2  15 1149.34 643.292   5
   6  -2 -15 674.062 381.365   4
   6  -2 -14-11.8854 303.772   3
   6   2 -14 54.6873 294.218   2
  -6  -2  14 56.4172 541.893   5
   6  -2 -14 369.452 283.126   4
   6   2 -13 2478.56 793.987   2
   6  -2 -13 1599.50 501.364   3
  -6  -2  13 3157.38 1081.08   5
   6  -2 -13 3479.15 807.116   4
   6   2 -12 9728.95 1450.80   2
   6   2 -12 12292.0 1972.26   5
  -6  -2  12 12454.0 2116.68   5
   6  -2 -12 10533.4 1311.03   5
   6  -2 -12 11400.9 1361.13   3
   6  -2 -12 11398.5 1408.44   4
   6   2 -11 27664.4 2394.35   2
   6  -2 -11 26051.1 2002.68   5
   6   2 -11 28189.1 2990.50   5
  -6   2  11 26796.5 2339.85   5
  -6  -2  11 25783.0 3002.12   5
   6  -2 -11 25486.8 2047.22   4
   6  -2 -11 27611.7 2127.17   3
   6   2 -10 404.999 349.857   2
   6  -2 -10 81.9916 234.826   3
  -6   2  10 858.676 431.181   5
   6   2 -10 915.873 606.667   5
   6  -2 -10 516.388 257.901   5
  -6  -2  10 48.1059 365.850   5
   6  -2 -10 704.747 357.512   4
   6  -2  -9 135.055 215.758   3
   6   2  -9 451.420 351.704   2
   6   2  -9-482.047 440.714   5
  -6  -2   9 101.986 394.090   5
   6  -2  -9 278.566 232.051   5
  -6   2   9 533.237 326.507   5
   6  -2  -9 472.105 293.681   4
   6  -2  -8 12354.4 1357.24   2
   6   2  -8 13871.0 1656.76   2
   6  -2  -8 12598.1 1306.15   5
   6   2  -8 11390.0 1903.22   5
  -6   2   8 12726.5 1473.61   5
  -6  -2   8 11134.1 1930.66   5
   6  -2  -8 12507.3 1296.77   4
   6  -2  -8 12599.8 1439.36   3
   6   2  -7 1651.28 611.473   2
   6  -2  -7 2028.56 560.006   2
  -6  -2   7 1417.52 732.490   5
  -6   2   7 1426.14 515.794   5
   6   2  -7 1458.83 674.326   5
   6  -2  -7 1917.16 510.941   5
   6  -2  -7 2677.44 687.488   3
   6  -2  -7 1495.91 436.815   4
   6   2  -6-20.3612 33.4129   3
   6   2  -6-108.566 395.828   2
   6  -2  -6 294.415 236.260   2
   6   2  -6-137.198 371.873   5
   6  -2  -6 93.5923 145.040   5
  -6   2   6 119.744 201.477   5
   6  -2  -6-28.2353 263.253   3
   6  -2  -6 226.701 177.516   4
   6  -2  -5 817.293 323.208   2
   6   2  -5 845.347 241.139   3
   6   2  -5 613.945 278.610   2
   6   2  -5 665.268 524.772   5
   6  -2  -5 446.519 255.935   5
  -6   2   5 903.560 370.792   5
   6  -2  -5 588.503 364.551   3
   6  -2  -5 636.121 271.404   4
   6  -2  -4 2825.40 614.797   2
   6   2  -4 2590.24 432.413   3
   6   2  -4 3030.72 780.975   2
   6  -2  -4 3026.22 610.005   5
   6   2  -4 3169.17 1008.21   5
   6  -2  -4 2866.26 541.058   4
  -6  -2   3 22076.1 2045.06   2
   6  -2  -3 23278.6 1739.66   2
   6   2  -3 24866.8 2150.22   2
   6  -2  -3 21876.8 1658.13   5
   6   2  -3 21394.1 2594.31   5
   6  -2  -3 22187.9 1420.79   4
   6   2  -3 22675.8 1344.77   3
   6   2  -2 289.902 227.202   2
   6  -2  -2 311.835 254.647   2
  -6  -2   2 312.202 260.923   2
   6  -2  -2 755.101 307.437   5
   6   2  -2 611.815 442.024   5
   6  -2  -2 445.895 202.612   4
   6   2  -1 3406.78 823.258   2
  -6  -2   1 3499.47 805.730   2
   6  -2  -1 3251.99 638.656   2
   6  -2  -1 3699.30 696.001   5
   6   2  -1 2732.82 934.045   5
   6  -2  -1 3839.68 539.947   4
   6  -2   0 63.8870 171.712   2
   6   2   0 566.291 388.138   2
  -6  -2   0 495.197 358.460   2
   6  -2   0-287.178 223.336   5
   6   2   0 466.497 452.851   5
   6  -2   0 276.387 148.970   4
   6   2   1 2128.03 638.917   2
  -6  -2  -1 2465.37 704.466   2
   6  -2   1 2053.32 514.910   2
   6   2   1 1573.73 707.812   5
   6  -2   1 2427.56 580.789   5
   6  -2   1 1877.06 345.663   4
  -6  -2  -2 14726.9 1708.42   2
   6  -2   2 14735.6 1345.92   2
   6   2   2 13539.7 1631.74   2
   6  -2   2 13650.4 1427.04   5
   6   2   2 12328.8 1966.13   5
   6  -2   2 12936.7 855.029   4
  -6  -2  -3 353.831 293.704   2
   6  -2   3 441.862 231.424   2
   6   2   3 429.959 371.525   2
  -6   2  -3 686.911 302.260   2
   6   2   3 492.759 356.667   5
   6  -2   3 195.267 212.274   5
   6   2   4 1542.29 598.462   2
  -6  -2  -4 1939.68 646.790   2
  -6   2  -4 1720.56 466.965   2
   6  -2   4 1324.49 377.623   2
   6   2   4 1626.73 670.653   5
   6  -2   4 2205.01 597.196   5
  -6  -2  -5 2020.64 674.830   2
  -6   2  -5 2101.41 534.850   2
   6   2   5 1726.11 608.182   2
   6  -2   5 1476.59 461.416   2
   6   2   5 1442.24 670.425   5
   6  -2   5 1976.59 575.756   5
   6   2   6 3330.94 853.942   2
   6  -2   6 4511.46 776.813   2
  -6   2  -6 4119.60 750.394   2
  -6  -2  -6 4636.57 990.014   2
   6   2   6 3505.68 1039.66   5
   6  -2   6 4048.60 816.539   5
   6  -2   7 20918.1 1709.37   2
  -6   2  -7 20418.3 1684.09   2
  -6  -2  -7 22370.5 2210.86   2
   6   2   7 19762.9 2067.74   2
   6   2   7 20689.1 2549.89   5
   6   2   8 306.360 351.837   2
   6  -2   8 499.283 274.025   2
  -6   2  -8 508.377 303.005   2
  -6  -2  -8 725.773 422.982   2
   6   2   8 814.679 525.900   5
   6  -2   8 434.613 134.161   4
   6   2   9 2635.35 791.718   2
   6  -2   9 2645.74 658.212   2
  -6  -2  -9 3056.98 877.433   2
  -6   2  -9 2854.57 668.784   2
   6  -2   9 2734.98 311.986   4
   6  -2  10 24922.2 2288.61   1
   6   2  10 22840.4 2303.63   2
  -6   2 -10 24609.3 1963.63   2
   6  -2  10 23972.2 1962.67   2
   6  -2  10 24107.9 914.713   4
   6  -2  11 20131.4 2113.36   1
   6  -2  11 19910.3 1809.98   2
   6   2  11 22409.1 2301.77   2
  -6   2 -11 22109.2 1907.25   2
   6  -2  11 21040.2 861.177   4
   6   2  12 625.310 388.630   2
   6  -2  12 1045.08 522.762   1
   6  -2  12 774.686 381.173   2
  -6   2 -12 994.359 429.218   2
   6  -2  12 937.164 194.633   4
   6  -2  13 29.6206 313.930   1
   6   2  13-216.395 309.949   2
   6  -2  13 149.504 256.200   2
  -6   2 -13-416.693 296.804   2
   6  -2  13 116.294 63.6508   4
   6   2  14-410.518 428.080   2
   6  -2  14-633.408 444.043   1
   6  -2  14-385.682 306.118   2
  -6   2 -14-495.958 339.597   2
   6  -2  14 211.178 117.201   4
   6  -2  15 533.141 418.192   1
   6   2  15-135.652 489.825   2
  -6   2 -15 1.68018 104.620   2
   6   2  15-75.4641 414.302   4
   6  -2  15 68.4816 78.3204   4
   6  -2  16 1541.30 649.624   1
   6   2  16 1265.93 647.235   2
  -6   2 -16 858.706 423.817   2
   6   2  16 1816.67 745.951   4
   6  -2  16 1534.62 293.983   4
   6  -2  17 2364.98 898.076   1
   6   2  17 2066.92 796.134   2
  -6   2 -17 2012.92 690.964   2
   6  -2  17 1771.78 344.376   4
   6   2  17 2234.93 811.202   4
   6  -2  18-67.7843 261.157   1
   6   2  18 211.720 438.319   2
  -6   2 -18 25.2050 92.4871   2
   6  -2  18 63.4764 93.2930   4
   6   2  18 240.534 362.207   4
   6  -2  19 453.051 420.962   1
   6   2  19 33.2167 282.030   2
  -6   2 -19 42.8171 167.318   2
   6  -2  19 95.4284 123.166   4
   6   2  19-162.413 313.580   4
   6  -2  20 5884.54 1308.81   1
   6   2  20 5140.10 1298.94   2
   6   2  20 5880.35 1292.23   4
   6  -2  21 1205.71 667.359   1
   6   2  21 847.764 576.354   2
   6   2  21 1662.56 722.766   4
   6  -2  22 397.525 262.207   1
   6   2  22 876.906 527.652   4
   6  -2  23 903.786 574.833   1
   6   2  23 700.088 503.820   4
   6  -2  24-108.777 309.028   1
   6   2  24 172.671 364.285   4
   6  -2  25 181.912 378.212   1
   6   2  25 2049.93 777.134   4
   6  -2  26 1132.89 630.724   1
   6   2  26-607.383 488.072   4
   6  -2  27 1988.13 834.907   1
   6   2  27 1140.56 563.878   4
   6  -2  28 374.966 439.585   1
   6   2  28-172.379 332.091   4
   6  -2  29 15.5342 251.824   1
   6   2  29-224.661 401.274   4
   6  -2  30 359.800 408.517   1
   6   2  30 180.609 335.634   4
   6  -2  31 235.330 408.531   1
   6   2  31 807.298 560.888   4
   6  -2  32-730.148 583.852   1
   6   2  32-521.754 488.551   4
   6  -2  33 195.511 341.497   1
   6   2  33 629.827 580.322   4
   6  -2  34-168.575 422.745   5
   6  -2  34 1930.72 893.479   1
   6  -2  35-164.232 470.775   1
  -6   3  36-237.100 404.237   5
  -6   3  35-1583.21 961.210   5
  -6   3  34 1535.83 897.292   5
  -6   3  33 223.727 412.395   5
  -6  -3  32 862.843 757.026   5
  -6   3  32 1326.05 889.401   5
  -6  -3  31 2432.44 1332.01   5
  -6   3  31 443.898 490.577   5
  -6  -3  30 3090.87 1416.52   5
  -6   3  30 1310.86 797.835   5
  -6  -3  29 454.424 706.986   5
  -6   3  29 363.965 412.220   5
  -6  -3  28-91.3965 367.006   5
  -6   3  28-598.787 511.199   5
  -6  -3  27-736.539 731.627   5
  -6   3  27-766.804 555.894   5
  -6  -3  26 808.425 723.809   5
  -6   3  26-1445.99 648.708   5
  -6   3  25 466.216 493.313   5
  -6  -3  25 135.837 382.246   5
  -6   3  24 1229.03 669.480   5
  -6  -3  24 697.870 725.263   5
  -6   3  23 4957.92 1274.29   5
  -6  -3  23 3504.05 1389.36   5
  -6   3  22 479.529 433.910   5
  -6  -3  22 1215.99 769.966   5
  -6  -3  21 691.424 677.452   5
  -6   3  21 1530.75 696.358   5
   6  -3 -21 614.871 167.143   1
   6   3 -20-371.967 396.878   2
  -6  -3  20-976.281 744.229   5
  -6   3  20-635.922 456.177   5
   6  -3 -20 171.957 138.994   1
   6   3 -19 9498.00 1621.75   2
  -6   3  19 9879.93 1641.00   5
  -6  -3  19 8999.20 2047.52   5
   6  -3 -19 8738.99 883.242   1
   6   3 -18 3814.69 1007.36   2
  -6   3  18 4274.17 1046.72   5
  -6  -3  18 4661.26 1435.12   5
   6  -3 -18 3266.02 588.618   1
   6   3 -17 10619.3 1655.83   2
  -6  -3  17 12285.3 2355.89   5
  -6   3  17 10014.8 1574.09   5
   6  -3 -17 11335.4 1103.14   1
   6   3 -16 13116.1 1818.61   2
   6  -3 -16 13787.0 1272.38   1
  -6  -3  16 14725.4 2559.82   5
   6   3 -15 11900.2 1720.68   2
   6  -3 -15 11206.8 1180.43   1
  -6  -3  15 11556.0 2254.01   5
   6  -3 -15 8843.14 1415.56   4
   6  -3 -15 11074.5 1554.38   3
   6   3 -14 7860.04 1402.80   2
   6  -3 -14 6590.19 1208.10   3
   6  -3 -14 6484.32 924.496   1
  -6  -3  14 5882.01 1573.41   5
   6  -3 -14 5475.04 1097.63   4
   6   3 -13 22974.5 2313.58   2
   6  -3 -13 24303.6 1809.59   1
  -6   3  13 23505.3 2123.76   5
  -6  -3  13 22887.8 3058.44   5
   6  -3 -13 22258.6 2124.95   4
   6  -3 -13 23331.8 2247.35   3
   6   3 -12 4234.51 1032.91   2
   6  -3 -12 5226.15 1107.04   3
   6  -3 -12 4434.99 845.821   1
  -6  -3  12 3507.79 1276.51   5
  -6   3  12 3530.90 816.989   5
   6  -3 -12 3332.09 823.055   4
   6  -3 -11 953.127 419.434   3
   6   3 -11 1771.27 660.928   2
   6  -3 -11 1394.67 483.769   1
  -6   3  11 1155.24 448.142   5
  -6  -3  11 872.103 516.220   5
   6  -3 -11 1731.63 591.474   4
   6   3 -10-63.1398 350.171   2
   6  -3 -10 854.937 400.346   1
  -6   3  10 616.799 344.871   5
  -6  -3  10-177.369 703.866   5
   6  -3 -10 812.387 371.616   4
   6   3  -9-9.14026 360.914   2
   6  -3  -9-354.497 384.579   3
   6  -3  -9 456.704 321.893   1
  -6   3   9 49.5387 147.380   5
   6  -3  -9 133.417 175.606   4
   6  -3  -8 12872.2 1336.12   2
   6   3  -8 13006.3 1656.77   2
   6  -3  -8 14103.6 1514.51   1
  -6  -3   8 10978.5 2010.85   5
  -6   3   8 13220.5 1223.36   5
   6  -3  -8 13140.2 1414.43   4
   6  -3  -8 12761.7 1667.41   3
   6  -3  -7 4259.51 977.721   3
   6  -3  -7 5528.70 874.805   2
   6   3  -7 3586.45 878.521   2
   6  -3  -7 4626.16 885.054   1
  -6   3   7 5567.87 732.652   5
  -6  -3   7 4510.69 1262.22   5
   6  -3  -7 4579.37 795.710   4
   6  -3  -6 5336.68 959.610   1
   6   3  -6 4107.44 938.269   2
   6  -3  -6 5410.61 1120.94   3
   6  -3  -6 4747.46 783.207   2
  -6  -3   6 3264.53 1050.67   5
   6  -3  -6 4999.88 801.592   4
   6  -3  -5 3905.39 854.261   1
   6  -3  -5 3371.58 654.845   2
   6   3  -5 2878.66 796.331   2
   6  -3  -5 3415.47 848.620   3
  -6  -3   5 2955.08 1084.09   5
   6   3  -5 3247.53 597.144   3
   6  -3  -5 3774.42 675.021   4
   6  -3  -4 3059.83 734.613   1
   6   3  -4 1968.36 643.774   2
   6  -3  -4 1448.07 408.862   2
   6   3  -4 2303.91 519.214   3
  -6  -3   4 3349.47 1110.93   5
   6  -3  -4 1946.44 681.314   3
   6  -3  -4 2499.53 518.968   4
   6  -3  -3 5852.61 1120.24   1
   6   3  -3 6549.54 1196.98   2
   6  -3  -3 5465.43 813.581   2
   6  -3  -3 5071.83 726.752   4
   6   3  -3 6190.71 905.921   3
   6  -3  -2 4140.16 900.728   1
  -6  -3   2 3310.25 847.663   2
   6   3  -2 4883.28 1036.71   2
   6   3  -2 3972.75 725.656   3
   6  -3  -2 4007.07 655.753   2
   6  -3  -2 4069.73 616.027   4
   6   3  -1 1488.42 535.597   2
   6   3  -1 1662.63 485.191   3
   6  -3  -1 1776.91 452.090   2
  -6  -3   1 1872.53 627.132   2
   6  -3  -1 1928.58 614.748   1
   6  -3  -1 1061.60 185.484   5
   6  -3  -1 1667.45 370.609   4
   6  -3   0 6347.96 8359.72   2
   6   3   0 6958.88 12518.0   2
  -6  -3   0 4063.75 9604.33   2
   6  -3   0 8045.33 12871.4   1
   6  -3   0 5075.00 4660.61   5
   6   3   0 6965.50 10441.4   3
   6  -3   0 5907.02 6428.32   4
   6   3   1 1911.36 552.507   3
   6   3   1 2239.30 710.565   2
   6  -3   1 2383.75 492.341   2
  -6  -3  -1 2087.34 697.232   2
   6  -3   1 2734.22 744.023   1
   6  -3   1 2178.44 332.073   5
   6  -3   1 2236.87 361.550   4
  -6  -3  -2-77.9090 149.522   2
   6   3   2 172.778 251.630   3
   6   3   2-656.180 562.273   2
   6  -3   2-123.574 267.332   1
   6  -3   2-389.532 225.883   2
   6  -3   2-25.1403 97.3818   5
   6  -3   2 149.445 92.0995   4
  -6  -3  -3 2646.15 757.397   2
   6   3   3 2970.52 713.309   3
   6  -3   3 2640.85 450.843   5
   6   3   3 1877.63 678.822   2
   6  -3   3 2149.41 439.381   2
   6  -3   3 3339.70 845.769   1
   6  -3   4 4269.60 658.044   2
  -6  -3  -4 4636.10 1025.97   2
   6   3   4 4768.24 895.792   3
   6  -3   4 5244.79 693.723   5
   6   3   4 3854.82 976.202   2
   6  -3   4 3218.00 865.995   1
   6  -3   5 1157.13 356.979   5
   6   3   5 1156.77 588.573   2
   6  -3   5 1282.99 371.878   2
   6  -3   5 869.997 475.599   1
   6   3   6 17648.8 2060.22   2
   6  -3   6 14503.5 1276.93   2
   6  -3   6 14192.2 1319.40   5
   6  -3   6 15776.2 1957.31   1
   6  -3   7 38849.7 2108.67   2
   6   3   7 37367.4 2998.51   2
  -6   3  -7 36895.3 2050.34   2
   6  -3   7 37536.4 2973.12   1
   6  -3   7 38162.1 2236.07   5
   6   3   8 2191.87 770.526   2
   6  -3   8 3111.50 929.016   1
   6  -3   8 2823.02 601.594   2
  -6   3  -8 2847.58 604.111   2
   6  -3   8 3099.05 688.959   5
   6  -3   9 15498.0 2040.61   1
   6   3   9 14136.3 1913.31   2
  -6   3  -9 13051.3 1275.85   2
   6  -3   9 14049.3 1314.98   2
   6  -3  10 23088.5 2439.46   1
   6  -3  10 20906.2 1626.56   2
  -6   3 -10 18522.8 1553.37   2
   6   3  10 19823.9 2256.58   2
   6   3  11 161.394 359.464   2
   6  -3  11 328.173 422.370   1
  -6   3 -11-125.019 248.402   2
   6   3  12 5427.77 1254.89   2
   6  -3  12 5531.10 1220.10   1
  -6   3 -12 2661.88 622.914   2
   6   3  13 2207.82 789.974   2
   6  -3  13 2110.53 816.407   1
  -6   3 -13 2083.52 562.177   2
   6   3  14 2871.34 923.711   2
   6  -3  14 2427.25 854.202   1
  -6   3 -14 3001.75 713.679   2
   6   3  15-190.318 394.086   2
   6  -3  15 114.624 248.859   1
  -6   3 -15-247.477 218.229   2
   6   3  15-48.9625 440.984   4
   6   3  16-374.290 478.550   2
   6  -3  16-325.506 374.457   1
  -6   3 -16 33.5673 139.380   2
   6   3  16-228.962 409.994   4
   6  -3  17 12307.4 1994.83   1
  -6   3 -17 12430.1 1536.87   2
   6   3  17 14486.2 2104.31   2
   6   3  17 12766.4 2039.44   4
   6   3  18 3455.92 1094.77   2
   6  -3  18 3833.43 1119.18   1
  -6   3 -18 3119.66 783.957   2
   6   3  18 4456.03 1236.06   4
   6   3  19 545.565 486.411   2
   6  -3  19 552.344 365.770   1
  -6   3 -19 34.2721 152.356   2
   6   3  19-639.118 514.338   4
   6  -3  20 62.6819 291.123   1
  -6   3 -20 24.6463 193.751   2
   6  -3  21 3394.53 1073.62   1
   6   3  21 3653.18 1148.71   4
   6  -3  22 216.544 326.345   1
   6   3  22 599.819 512.723   4
   6  -3  23 3367.39 1146.42   1
   6   3  23 3299.37 1103.39   4
   6  -3  24 193.592 388.507   1
   6  -3  24 677.583 488.575   5
   6   3  24 1063.48 685.571   4
   6  -3  25-544.253 583.299   1
   6  -3  25 616.114 482.881   5
   6   3  25 229.739 359.030   4
   6  -3  26 599.451 536.268   1
   6  -3  26-677.580 527.721   5
   6   3  26 758.059 553.261   4
   6  -3  27 1171.82 689.131   1
   6  -3  27 797.162 569.675   5
   6   3  27 1767.74 930.380   4
   6  -3  28 2933.14 1074.07   1
   6  -3  28 2042.23 1027.87   5
   6   3  28 2443.01 1002.52   4
   6  -3  29 719.290 612.178   1
   6  -3  29 2282.24 938.321   5
   6   3  29 714.648 571.696   4
   6  -3  30 1045.00 703.759   5
   6  -3  30 155.309 330.920   1
   6  -3  31-88.0746 365.360   5
   6  -3  31-1121.35 704.786   1
   6  -3  32 1405.93 789.356   5
   6  -3  33 1338.58 794.766   5
   6   4 -30 3.31082 758.633   2
  -6   4  30-438.986 479.542   5
   6   4 -29 373.294 437.345   2
  -6   4  29 429.902 482.453   5
  -6  -4  29 482.144 630.544   5
   6   4 -28 2488.07 1004.94   2
  -6   4  28 1430.10 777.845   5
  -6  -4  28 458.656 671.030   5
   6   4 -27 1628.33 768.940   2
  -6   4  27 1311.18 725.282   5
  -6  -4  27 1247.90 946.514   5
   6   4 -26-325.706 370.749   2
  -6   4  26 741.606 516.157   5
  -6  -4  26 1609.52 1017.56   5
   6   4 -25 766.319 531.901   2
  -6   4  25 365.246 370.254   5
  -6  -4  25 1879.07 1104.47   5
   6   4 -24 2619.95 929.302   2
  -6   4  24 4054.14 1139.97   5
   6   4 -23 405.649 403.861   2
  -6   4  23 665.995 493.645   5
  -6  -4  23 909.042 757.845   5
   6   4 -22-396.946 380.548   2
  -6   4  22-32.9162 195.368   5
  -6  -4  22 440.346 544.948   5
   6   4 -21-301.673 376.990   2
  -6   4  21 504.135 394.853   5
  -6  -4  21 163.166 451.162   5
   6   4 -20-210.820 339.363   2
  -6   4  20-754.144 440.280   5
  -6  -4  20-1234.19 895.142   5
   6   4 -19 3277.01 1012.98   2
  -6   4  19 2393.56 772.628   5
  -6  -4  19 2079.69 1111.51   5
   6   4 -18 66.6481 254.067   2
   6  -4 -18 456.474 216.473   1
   6   4 -17 252.283 361.985   2
   6  -4 -17 332.175 270.611   1
   6   4 -16 1072.47 652.864   2
  -6  -4  16 2202.49 1085.65   5
  -6   4  16 1639.75 568.769   5
   6  -4 -16 1515.94 463.377   1
   6   4 -15 2706.77 854.054   2
   6  -4 -15 2787.89 874.393   3
  -6  -4  15 3649.16 1367.58   5
  -6   4  15 2674.42 720.479   5
   6  -4 -15 3406.19 730.079   1
   6  -4 -14 6868.04 1358.81   3
   6   4 -14 6933.51 1325.22   2
   6  -4 -14 6949.55 1061.20   1
  -6  -4  14 5477.87 1612.04   5
  -6   4  14 6053.10 956.761   5
   6  -4 -13 1476.37 676.070   3
   6   4 -13 339.988 282.280   2
   6  -4 -13 1670.76 541.844   1
  -6  -4  13 2408.45 1017.07   5
  -6   4  13 1858.13 499.505   5
   6  -4 -13 1424.57 576.363   4
   6   4 -12 8416.37 1439.67   2
   6  -4 -12 8837.13 1269.28   1
  -6   4  12 8023.00 926.771   5
  -6  -4  12 7586.75 1900.21   5
   6  -4 -12 8767.56 1387.98   4
   6  -4 -12 9752.00 1639.67   3
   6   4 -11 15597.2 1937.81   2
   6  -4 -11 16561.7 1749.14   1
  -6   4  11 14215.8 1057.03   5
  -6  -4  11 17992.7 2755.72   5
   6  -4 -11 14448.2 1989.09   3
   6  -4 -11 13980.4 1710.51   4
   6  -4 -10 101.086 280.227   3
   6   4 -10 707.798 458.724   2
   6  -4 -10 1010.16 466.621   1
   6  -4 -10 1262.69 492.057   4
   6  -4  -9 558.770 358.000   1
   6   4  -9 1055.24 541.262   2
   6  -4  -9 544.964 435.573   3
   6  -4  -9 196.200 205.809   2
  -6  -4   9-23.9878 534.308   5
   6  -4  -9 632.280 356.905   4
   6  -4  -8 360.399 315.277   1
   6   4  -8-108.955 256.322   2
   6  -4  -8 259.210 206.984   2
   6  -4  -8 64.0004 126.378   4
   6  -4  -7 3722.94 883.537   1
   6  -4  -7 3085.84 895.522   3
   6  -4  -7 2089.53 492.548   2
   6   4  -7 1365.22 587.862   2
  -6  -4   7 2377.86 997.517   5
   6  -4  -7 3072.67 719.839   4
   6  -4  -6 1713.05 640.133   1
   6  -4  -6 1471.77 407.626   2
   6   4  -6 1108.25 536.800   2
   6  -4  -6 703.453 461.154   3
  -6  -4   6 1060.16 691.960   5
   6  -4  -6 1416.64 470.429   4
   6  -4  -5 2562.59 804.499   1
   6  -4  -5 2976.87 532.899   2
   6   4  -5 3260.07 866.569   2
   6  -4  -5 2422.18 878.618   3
   6  -4  -4-127.791 249.470   1
   6  -4  -4-208.751 534.766   3
   6   4  -4-621.860 462.931   2
   6  -4  -4-137.637 150.676   2
   6  -4  -3 2596.35 782.339   1
   6  -4  -3 2366.04 438.242   2
   6   4  -3 1118.99 505.302   2
   6  -4  -3 3111.13 932.520   3
   6   4  -3 1157.68 479.431   3
   6  -4  -2-7.98847 201.754   1
   6   4  -2-436.286 397.135   2
   6  -4  -2-93.0742 112.396   2
   6   4  -2 536.706 315.098   3
   6  -4  -2 7.44411 257.246   3
   6  -4  -1 1219.79 566.890   1
   6   4  -1 180.793 205.889   3
   6  -4  -1 1127.63 271.589   2
   6   4  -1 1329.42 560.831   2
   6  -4  -1 455.427 346.627   3
   6  -4   0 548.901 181.578   2
   6  -4   0 1383.32 610.506   1
   6   4   0 770.917 365.634   3
   6   4   0 635.835 382.327   2
   6  -4   0 984.319 589.482   3
   6   4   1 241.607 412.657   2
   6  -4   1 187.911 120.012   2
   6  -4   1 590.803 562.754   1
   6   4   1 1175.32 480.052   3
   6  -4   1 587.616 474.855   3
   6  -4   2 11320.3 1730.15   1
   6   4   2 10068.3 1580.93   2
   6  -4   2 10511.3 694.309   2
   6   4   2 11000.2 1551.77   3
   6   4   3 3955.53 1016.30   2
   6  -4   3 3612.63 1011.54   1
   6   4   3 3932.81 929.692   3
   6  -4   4 12172.3 1825.19   1
   6   4   4 10315.9 1616.20   2
   6   4   4 10802.6 1584.75   3
   6   4   5 1920.70 772.509   2
   6  -4   5 2714.50 904.967   1
   6   4   6 13885.2 1950.37   2
   6  -4   6 14633.3 2058.96   1
   6   4   7 2240.25 812.808   2
   6  -4   7 3218.00 1042.44   1
   6   4   8 15950.4 2087.50   2
   6  -4   8 17616.5 2280.64   1
   6   4   9 1144.55 601.663   2
   6  -4   9 560.822 540.548   1
   6  -4   9 517.883 203.316   5
   6  -4   9 755.117 228.507   5
   6   4  10 1281.62 678.288   2
   6  -4  10 1668.18 788.845   1
   6  -4  10 1053.06 301.405   5
   6   4  11 958.079 589.270   2
   6  -4  11 1541.46 754.008   1
   6  -4  11 707.197 278.003   5
   6   4  12 478.645 449.484   2
   6  -4  12 1347.27 691.500   1
   6  -4  12 765.985 311.452   5
   6   4  13-357.356 428.504   2
   6  -4  13 239.007 206.285   5
   6   4  14-298.981 439.609   2
   6  -4  14-261.178 396.327   1
   6  -4  14 32.4420 107.264   5
   6   4  14-863.061 608.860   4
   6   4  15 1523.50 735.950   2
   6  -4  15 1058.85 634.625   1
   6  -4  15 1206.12 460.645   5
   6   4  15 1693.25 796.594   4
   6   4  16 460.489 470.634   2
   6  -4  16 1016.37 625.816   1
   6  -4  16 936.926 446.400   5
   6   4  16 990.540 629.803   4
   6  -4  17 1113.96 684.688   1
   6   4  17 550.230 528.982   2
   6  -4  17 1201.19 502.650   5
   6   4  17 895.656 460.631   4
   6  -4  18 1328.44 770.721   1
   6   4  18 840.759 614.915   2
   6  -4  18 891.533 538.423   5
   6   4  18 150.816 319.315   4
   6  -4  19-555.715 539.613   1
   6   4  19-717.259 571.286   2
   6  -4  19 323.221 324.193   5
   6   4  19 364.281 457.965   4
   6  -4  20-87.7066 334.622   1
   6   4  20 702.412 664.329   4
   6  -4  21 487.634 480.638   1
   6   4  21 1050.74 703.921   4
   6  -4  22 404.074 445.202   1
   6   4  22-3.41891 199.147   4
   6  -4  23 943.555 624.736   1
   6   4  23 1420.32 758.362   4
   6  -4  24 482.765 544.703   1
   6   4  24 14.1944 645.700   4
   6  -4  25 117.722 366.980   1
   6   4  25-282.654 462.735   4
   6   5 -28 1647.53 815.341   2
   6   5 -27-161.068 325.676   2
   6   5 -26-273.843 389.525   2
  -6  -5  26 1403.92 1016.57   5
   6   5 -25-199.263 325.403   2
  -6  -5  25 5.66622 553.404   5
   6   5 -24 790.082 558.020   2
  -6  -5  24 210.471 424.417   5
   6   5 -23 616.251 509.969   2
  -6  -5  23 291.949 512.940   5
   6   5 -22-56.9283 209.610   2
  -6  -5  22-474.554 666.076   5
   6   5 -21 2648.51 900.711   2
  -6  -5  21 2381.06 1238.26   5
   6   5 -20 295.548 410.768   2
  -6  -5  20-750.626 806.186   5
   6   5 -19 1628.37 719.560   2
  -6  -5  19 1659.46 1167.90   5
   6   5 -18-784.470 503.227   2
  -6  -5  18 1082.66 851.821   5
   6   5 -17 962.241 537.112   2
  -6  -5  17 291.275 540.915   5
   6   5 -16 1316.96 623.038   2
  -6  -5  16-170.946 529.517   5
   6  -5 -15 2505.31 895.805   3
   6   5 -15 1424.12 660.870   2
  -6  -5  15 2244.11 1121.54   5
   6  -5 -14 197.528 333.694   3
   6   5 -14 202.625 309.626   2
   6  -5 -14 266.292 257.051   1
  -6  -5  14-683.185 646.343   5
   6  -5 -13 149.080 199.042   1
   6   5 -13 190.401 296.286   2
   6  -5 -13 409.608 396.182   3
  -6  -5  13 405.823 551.934   5
   6  -5 -12 329.898 295.373   1
   6   5 -12 710.374 485.845   2
   6  -5 -12-83.0684 334.424   3
  -6  -5  12-432.327 573.625   5
   6  -5 -11 3981.33 939.226   1
   6  -5 -11 2672.98 959.139   3
   6   5 -11 3255.99 1008.11   2
  -6  -5  11 3557.85 1284.85   5
   6  -5 -10 495.608 364.826   1
   6  -5 -10-228.697 360.645   3
   6   5 -10-46.4752 145.544   2
   6  -5  -9 988.057 502.633   1
   6  -5  -9 827.623 600.007   3
   6   5  -9 1339.89 586.147   2
   6  -5  -8 307.435 323.475   1
   6  -5  -8 161.525 335.486   3
   6   5  -8 252.233 297.047   2
   6  -5  -7 222.866 316.730   1
   6  -5  -7 1107.46 643.930   3
   6   5  -7 310.395 338.836   2
   6  -5  -6 1335.21 622.721   1
   6  -5  -6 523.823 501.653   3
   6   5  -6 382.350 371.010   2
   6  -5  -5-115.451 241.373   1
   6   5  -5 77.7730 220.259   2
   6  -5  -4-108.958 268.991   1
   6  -5  -4-164.681 344.303   3
   6   5  -4 235.438 313.435   2
   6   5  -3 222.092 314.436   2
   6  -5  -3 316.662 381.572   3
   6   5  -2-24.6266 203.518   2
   6  -5  -2-59.6355 205.182   1
   6  -5  -2-596.627 496.642   3
   6   5  -1 288.410 336.041   2
   6  -5  -1-119.486 275.473   1
   6   5   0 418.147 383.688   2
   6  -5   0 353.093 194.550   1
   6  -5   0 245.268 403.469   3
   6   5   1 584.248 438.614   2
   6  -5   1 522.616 444.487   1
   6  -5   1 900.331 601.808   3
   6   5   2 600.305 454.663   2
   6  -5   2 1196.70 659.179   1
   6  -5   2-537.902 506.719   3
   6   5   3-40.8228 257.011   2
   6  -5   3-326.055 350.635   1
   6  -5   3 723.833 600.328   3
   6   5   4 62.7579 428.683   2
   6  -5   4-389.104 430.067   1
   6  -5   4 443.656 415.367   3
   6   5   5 3354.60 1020.93   2
   6  -5   5 3277.05 1085.38   1
   6  -5   5 3540.86 1163.00   3
   6   5   6 1487.96 710.646   2
   6  -5   6 1831.99 860.170   1
   6  -5   6 1617.11 773.976   3
   6  -5   7 1156.46 688.515   1
   6   5   7 1873.51 823.540   2
   6  -5   8 678.746 538.676   1
   6   5   8 511.020 472.024   2
   6  -5   9 1054.68 469.005   1
   6   5   9-149.294 375.086   2
   6  -5  10 2326.84 959.102   1
   6   5  10 267.370 405.664   2
   6  -5  11 227.517 363.619   1
   6   5  11-203.732 378.615   2
   6  -5  12 1977.64 903.219   1
   6   5  12 677.407 531.645   2
   6   5  12 826.346 764.351   4
   6  -5  13-152.301 387.950   1
   6   5  13 482.453 441.111   2
   6   5  13 887.895 849.008   4
   6  -5  14-51.8460 210.251   1
   6   5  14-915.198 646.008   4
   6  -5  15 3822.05 1268.64   1
   6   5  15 2012.36 902.593   2
   6   5  15 3407.98 1199.30   4
   6  -5  16-579.175 552.605   1
   6   5  16 358.730 504.344   2
   6   5  16 391.824 443.702   4
   6  -5  17 1482.99 801.481   1
   6   5  17 1577.02 854.846   4
   6  -5  18-217.395 406.066   1
   6   5  18-33.6797 337.256   4
   6  -5  19 1361.87 802.188   1
   6   5  19 491.895 570.945   4
  -6  -6  21-288.780 482.224   5
  -6  -6  20 218.025 461.267   5
  -6  -6  19 160.122 414.665   5
  -6  -6  18 1146.28 833.329   5
  -6  -6  17-176.853 391.693   5
  -6  -6  16 655.401 669.046   5
  -6  -6  15-647.877 660.621   5
  -6  -6  14 663.553 718.782   5
   6  -6 -13 372.131 462.583   3
   6  -6 -12 484.607 481.866   3
   6   6 -12 1028.45 556.868   2
   6   6 -11 7.18463 187.050   2
   6  -6 -11-267.132 366.237   3
   6  -6 -10 276.167 434.903   3
   6   6 -10-228.380 305.022   2
   6  -6  -9 554.988 415.237   1
   6  -6  -9-189.885 333.618   3
   6   6  -9-409.801 373.364   2
   6   6  -8 627.278 445.395   2
   6  -6  -8 359.286 361.020   1
   6  -6  -8 236.727 324.046   3
   6   6  -7 329.626 381.938   2
   6  -6  -7 43.3007 234.290   1
   6  -6  -7-96.2751 306.478   3
   6   6  -6-800.761 511.837   2
   6  -6  -6 239.336 335.188   1
   6  -6  -6-496.306 568.851   3
   6   6  -5 623.405 430.114   2
   6  -6  -5 159.960 349.614   1
   6  -6  -5-76.1308 394.437   3
   6   6  -4 1506.73 676.879   2
   6  -6  -4 3701.43 1095.48   1
   6  -6  -4 1527.77 839.302   3
   6  -6  -3 1294.71 691.890   1
   6   6  -3 1095.43 592.580   2
   6  -6  -3 1581.02 839.783   3
   6   6  -2 501.417 418.135   2
   6  -6  -2 149.698 305.024   1
   6  -6  -2 506.358 467.439   3
   6   6  -1 183.129 341.248   2
   6  -6  -1-273.557 376.841   1
   6  -6  -1-474.999 503.676   3
   6   6   0-332.382 392.240   2
   6  -6   0 178.522 359.382   1
   6  -6   0-149.085 379.390   3
   6  -6   1-207.504 346.509   1
   6   6   1-334.267 349.062   2
   6  -6   1-800.605 622.779   3
   6  -6   2 346.911 410.715   1
   6   6   2 249.042 365.441   2
   6  -6   2 640.756 574.764   3
   6  -6   3 1589.26 812.361   1
   6   6   3 1327.27 637.203   2
   6  -6   3 1470.75 848.630   3
   6  -6   4 400.953 473.627   1
   6   6   4 845.874 535.997   2
   6  -6   4 1026.60 716.722   3
   6  -6   5 2138.85 980.151   1
   6   6   5 929.901 717.506   2
   6  -6   5 1039.98 775.570   3
   6  -6   6 20.7942 293.132   1
   6   6   6 179.521 312.946   2
   6  -6   7 497.792 514.342   1
   6   6   7-442.260 397.505   2
   6  -6   7-547.039 575.198   3
   6  -6   8-93.5028 265.121   1
   6   6   8-40.5716 246.517   2
   6  -6   9-293.038 454.224   1
   6   6   9 52.8597 268.059   2
   6   6   9 781.576 671.277   4
   6  -6   9 807.921 680.928   3
   6  -6  10-152.954 429.273   1
   6   6  10 1355.13 720.366   2
   6   6  10 1414.60 985.132   4
   6   6  11 3.04703 308.482   2
   6   6  11 233.325 395.000   4
   6   6  12 688.981 527.006   2
   6   6  13 1199.27 832.917   2
   6  -7  -3-224.803 318.037   1
   6  -7  -2-102.364 279.922   1
   6  -7  -1 176.334 301.215   1
   6  -7   0 682.162 567.082   1
  -7   0  35-701.871 690.627   5
  -7   0  34 2862.95 1496.62   5
  -7   0  33-1119.74 830.470   5
  -7   0  32 1135.96 828.788   5
  -7   0  31-214.926 486.456   5
  -7   0  30 2140.67 1094.00   5
  -7   0  29 488.519 523.707   5
  -7   0  28 2653.26 1215.45   5
  -7   0  27 382.185 493.447   5
  -7   0  26 1927.01 964.444   5
  -7   0  25 75.1012 304.556   5
  -7   0  24 8645.13 1962.00   5
  -7   0  23-799.367 621.754   5
  -7   0  22 162.244 359.567   5
  -7   0  21 982.309 720.127   5
  -7   0  20 647.671 551.932   5
  -7   0  19-203.750 395.732   5
  -7   0  18 9106.48 1885.95   5
  -7   0  17-1591.78 773.660   5
   7   0 -16 12.1701 294.180   5
  -7   0  16-318.714 445.488   5
   7   0 -15 236.924 292.669   5
  -7   0  15 549.344 466.962   5
  -7   0  14 6404.59 1495.30   5
   7   0 -14 3126.23 968.991   5
  -7   0  13-434.909 467.492   5
   7   0 -13-88.5690 225.376   5
   7   0 -12 47043.1 3143.56   2
   7   0 -12 42392.0 3428.35   5
  -7   0  12 41945.4 3626.95   5
   7   0 -11-37.3396 76.3772   3
   7   0 -11-127.094 262.930   2
  -7   0  11 142.334 348.128   5
   7   0 -11-2.29445 212.728   5
   7   0 -10 794.001 247.385   3
   7   0 -10 888.237 477.321   2
   7   0 -10 938.165 537.431   5
  -7   0  10 1699.84 792.765   5
   7   0  -9-74.7733 101.129   3
   7   0  -9 198.255 324.068   2
  -7   0   9-134.672 461.793   5
   7   0  -9-39.0665 229.331   5
   7   0  -8 38994.5 2754.36   2
   7   0  -8 42670.5 3418.72   5
  -7   0   8 38961.1 3309.87   5
   7   0  -8 37616.4 1676.34   3
   7   0  -7 182.860 278.042   2
  -7   0   7-48.3020 301.388   5
[truncated: 159,023 more chars]
