# Supplementary material
Source: MDPI journal article supplement (https://www.mdpi.com/2073-4352/13/8/1239)
Supplement: s1 [file s1 › Supplementary Figures.pdf]

Supplementary Materials

# Catalyst Free Synthesis of Novel 4-(benzofuran-2-yl)-*N*-phenyl-thiazol-2(3*H*)-imines, Crystal Structure Elucidation, and the Effect of Phenyl Substitution on Crystal Packing

Bakr F. Abdel-Wahab <sup>1</sup>, Benson M. Kariuki <sup>2,\*</sup>, Hanan A. Mohamed <sup>1</sup> and Gamal A. El-Hiti <sup>3,\*</sup>

<sup>1</sup> Applied Organic Chemistry Department, Chemical Industries Research Institute, National Research Centre, Dokki, Giza 12622, Egypt; bf.fathy@nrc.sci.eg (B.F.A.-W.); ha.mostafa@nrc.sci.eg (H.A.M.)

<sup>2</sup> School of Chemistry, Cardiff University, Main Building, Park Place, Cardiff CF10 3AT, UK

<sup>3</sup> Department of Optometry, College of Applied Medical Sciences, King Saud University, Riyadh 11433, Saudi Arabia

\* Correspondence: kariukib@cardiff.ac.uk (B.M.K.); gelhiti@ksu.edu.sa (G.A.E.-H.); Tel.: +966-11469-3778 (G.A.E.-H.); Fax: +966-11469-3536 (G.A.E.-H.)

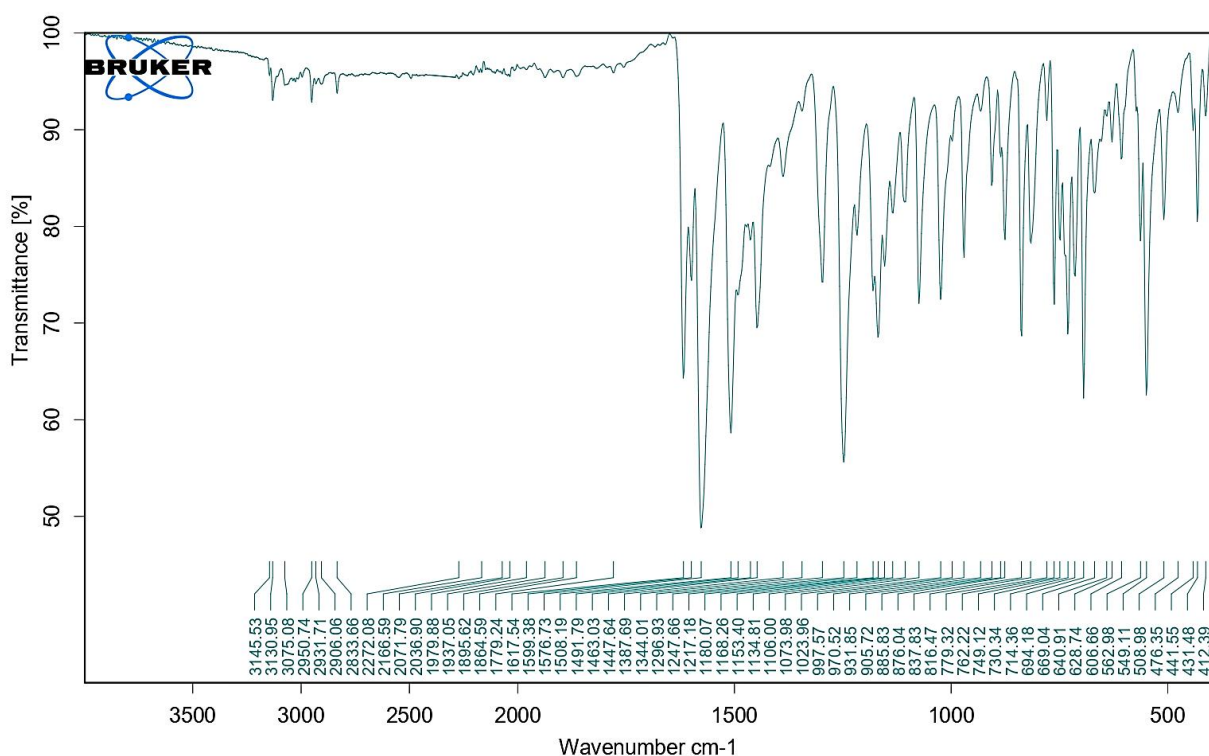

D:\Bakr fathy\4-7-2023\GB259.0

GB259

Sample

04/07/2023

Figure S1. The IR spectrum of 5a.

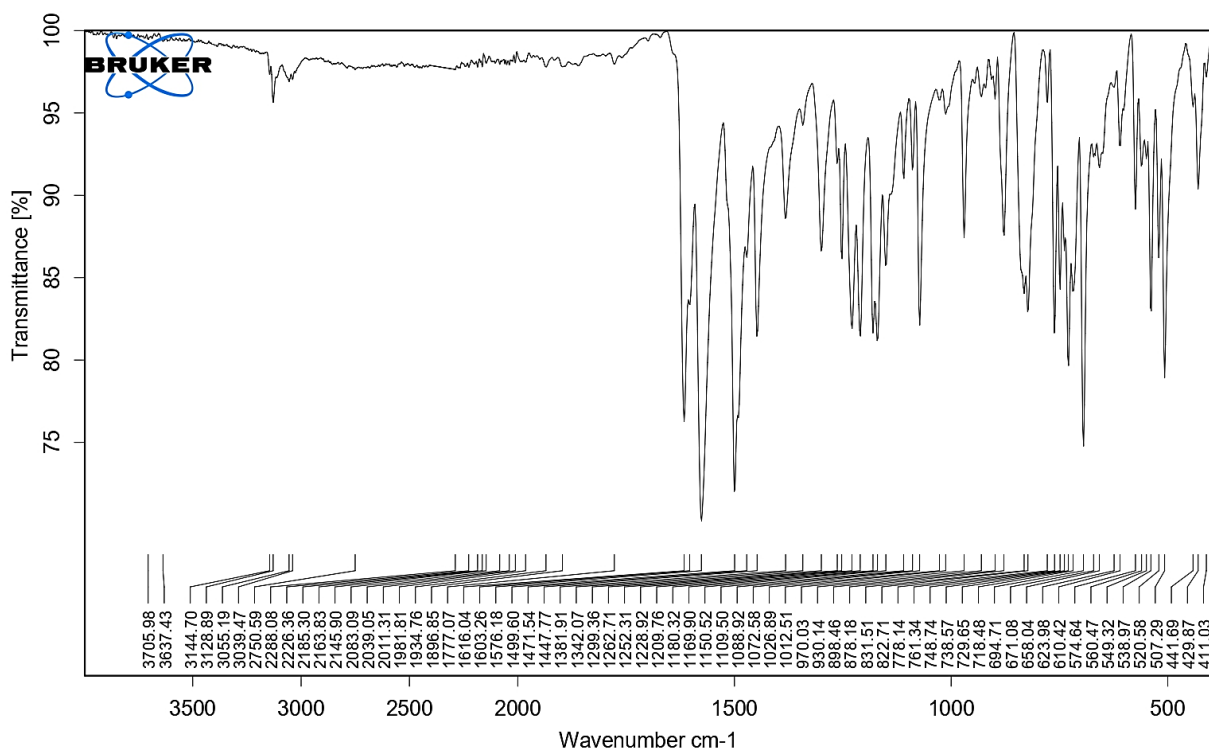

D:\Bakr fathy\4-7-2023\HGB10.0

HGB10

Sample

04/07/2023

**Figure S2.** The IR spectrum for the mixture containing **5b** and **6**.

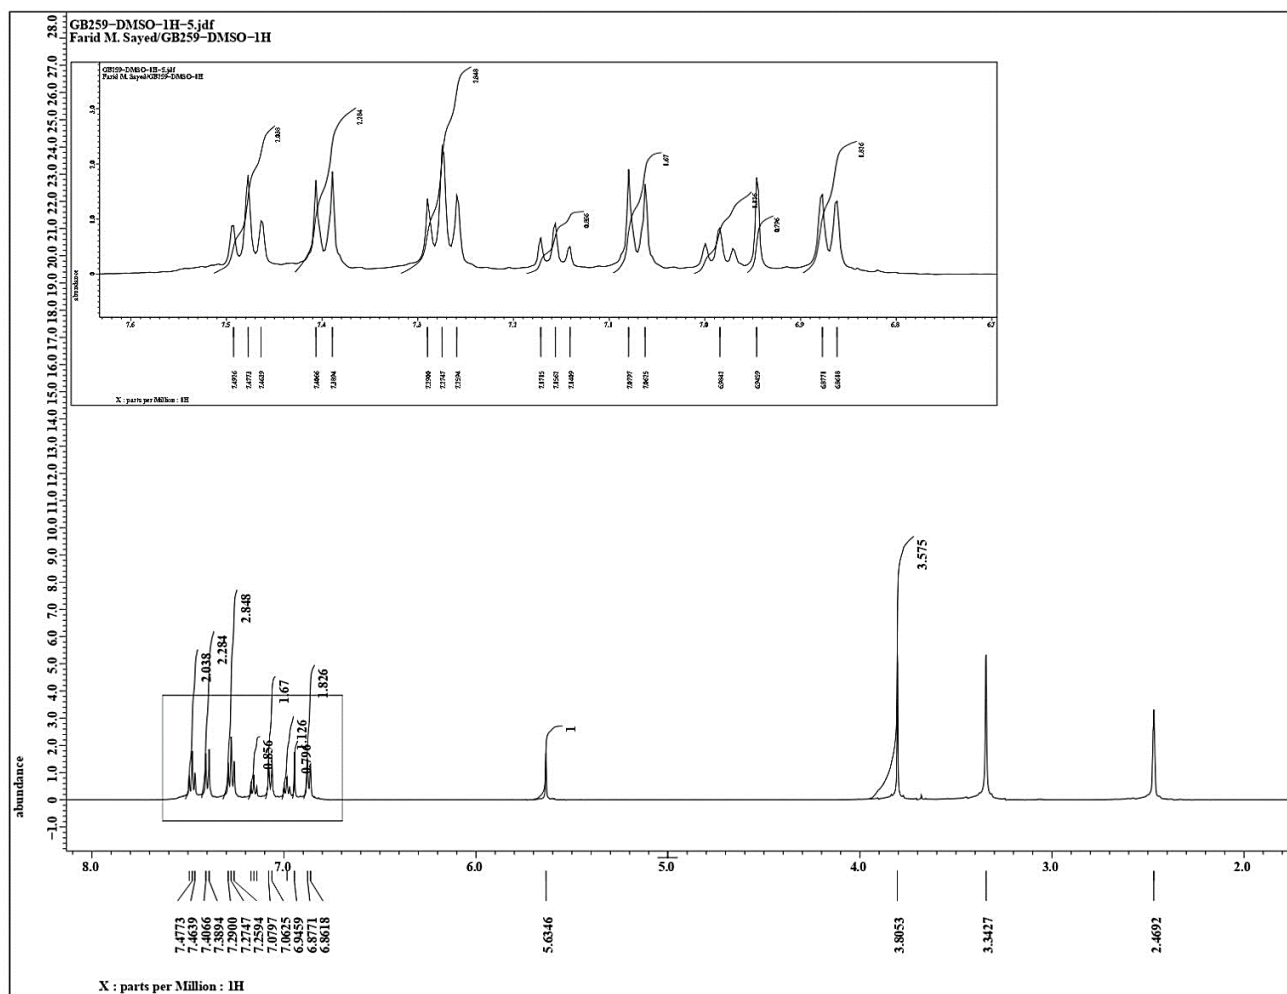

Figure S3. The  $^1\text{H}$  NMR spectrum of **5a**.

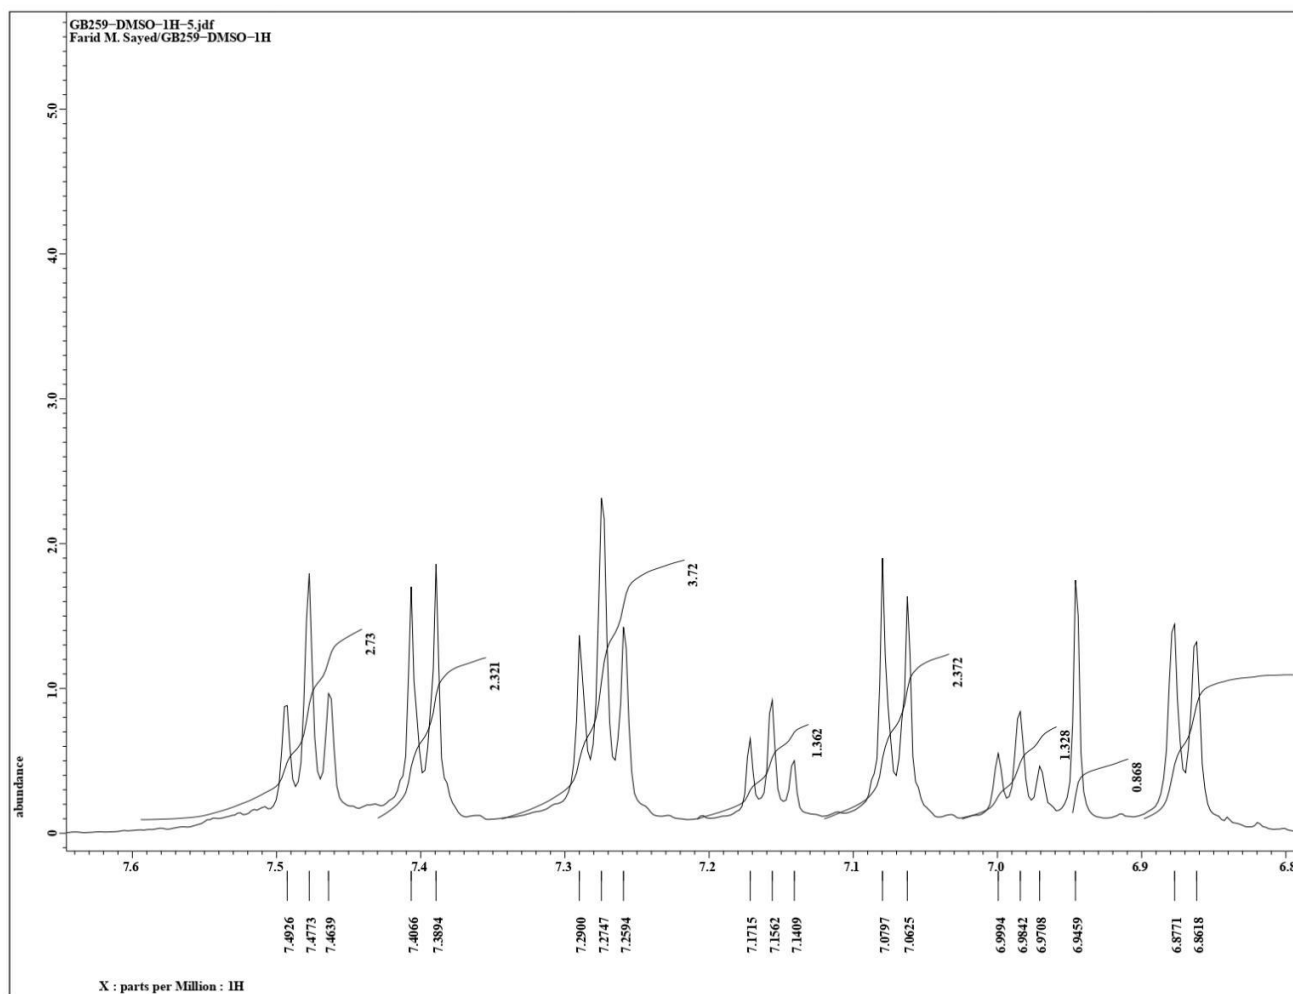

**Figure S4.** The  $^1\text{H}$  NMR spectrum (expansion) of **5a**.

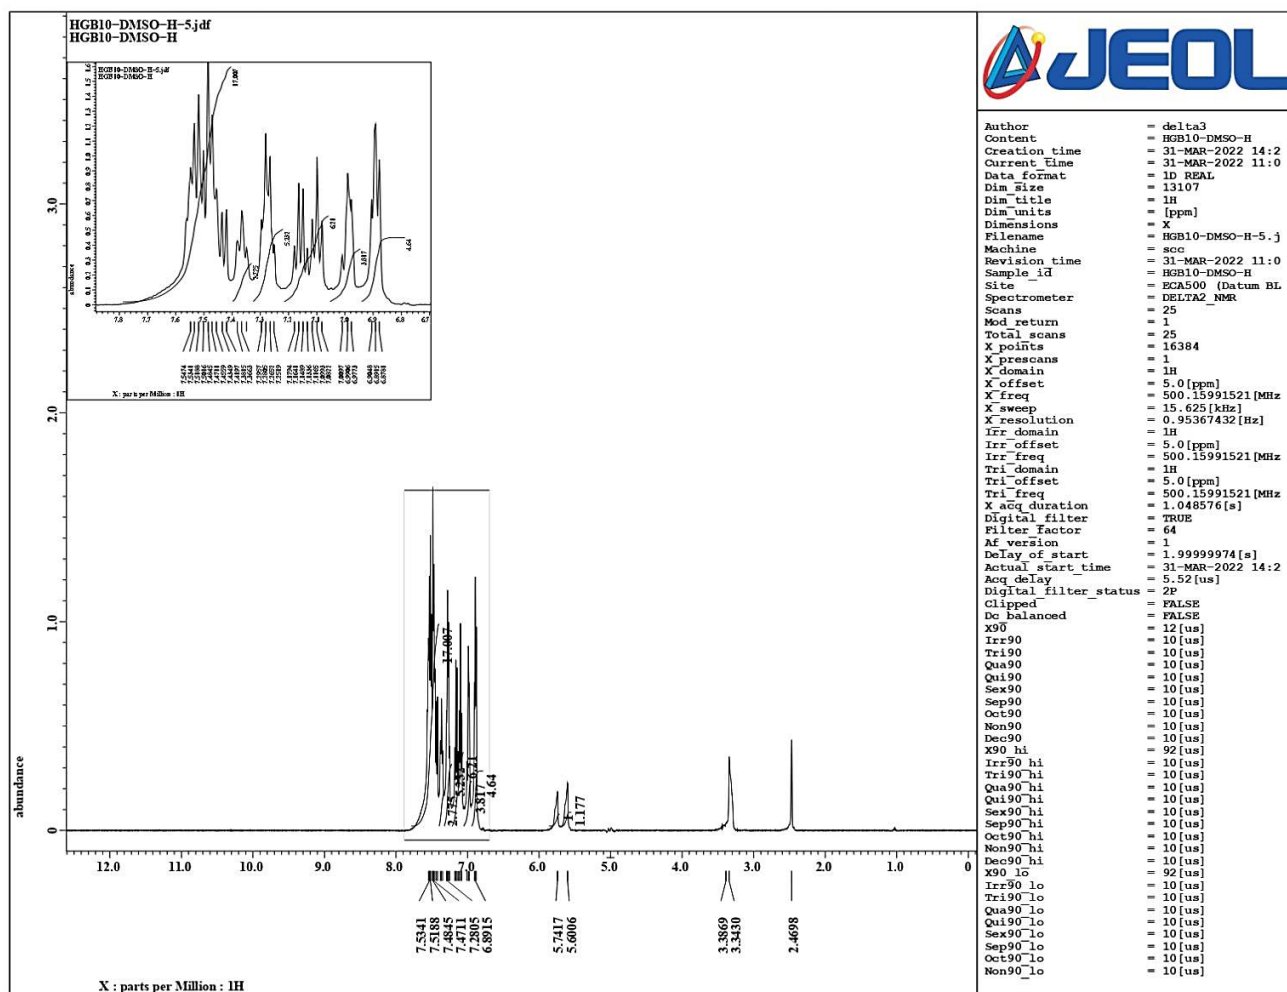Figure S5. The  $^1\text{H}$  NMR spectrum for the mixture containing **5b** and **6**.

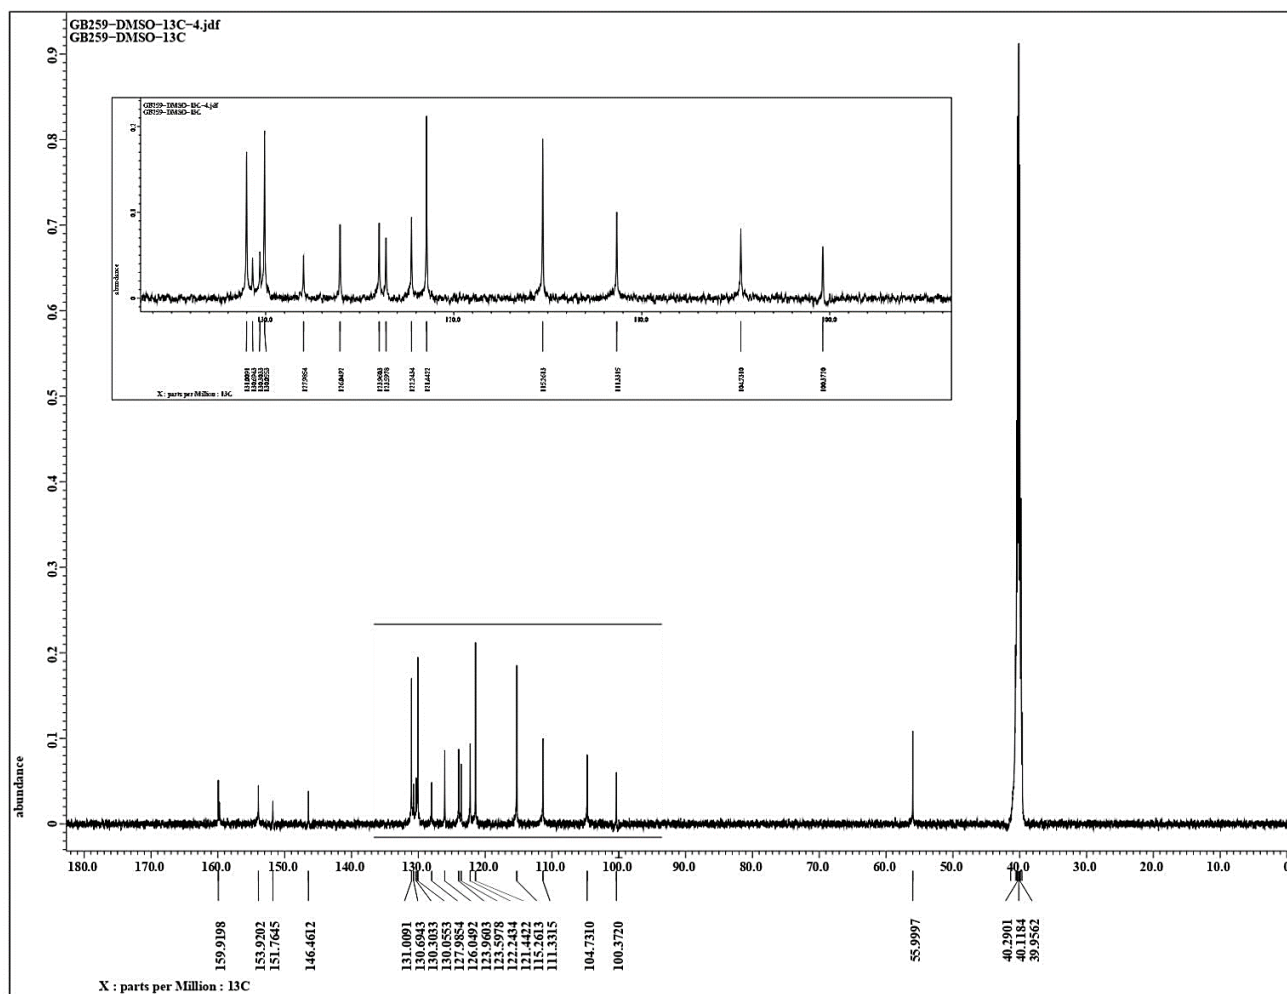

Figure S6. The  $^{13}\text{C}$  NMR spectrum of 5a.

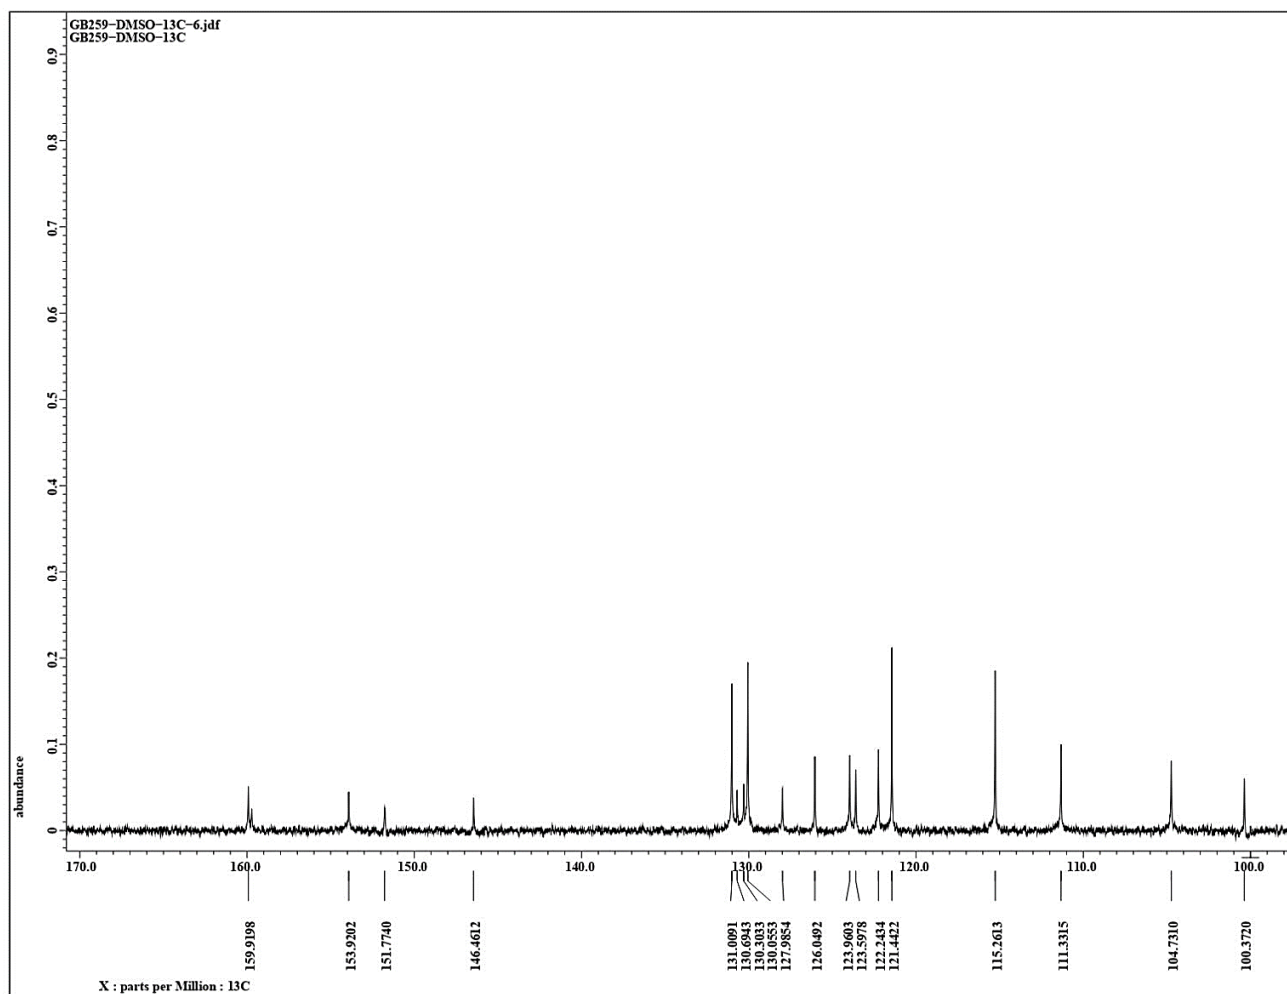

Figure S7. The  $^{13}\text{C}$  NMR spectrum (expansion) of 5a.

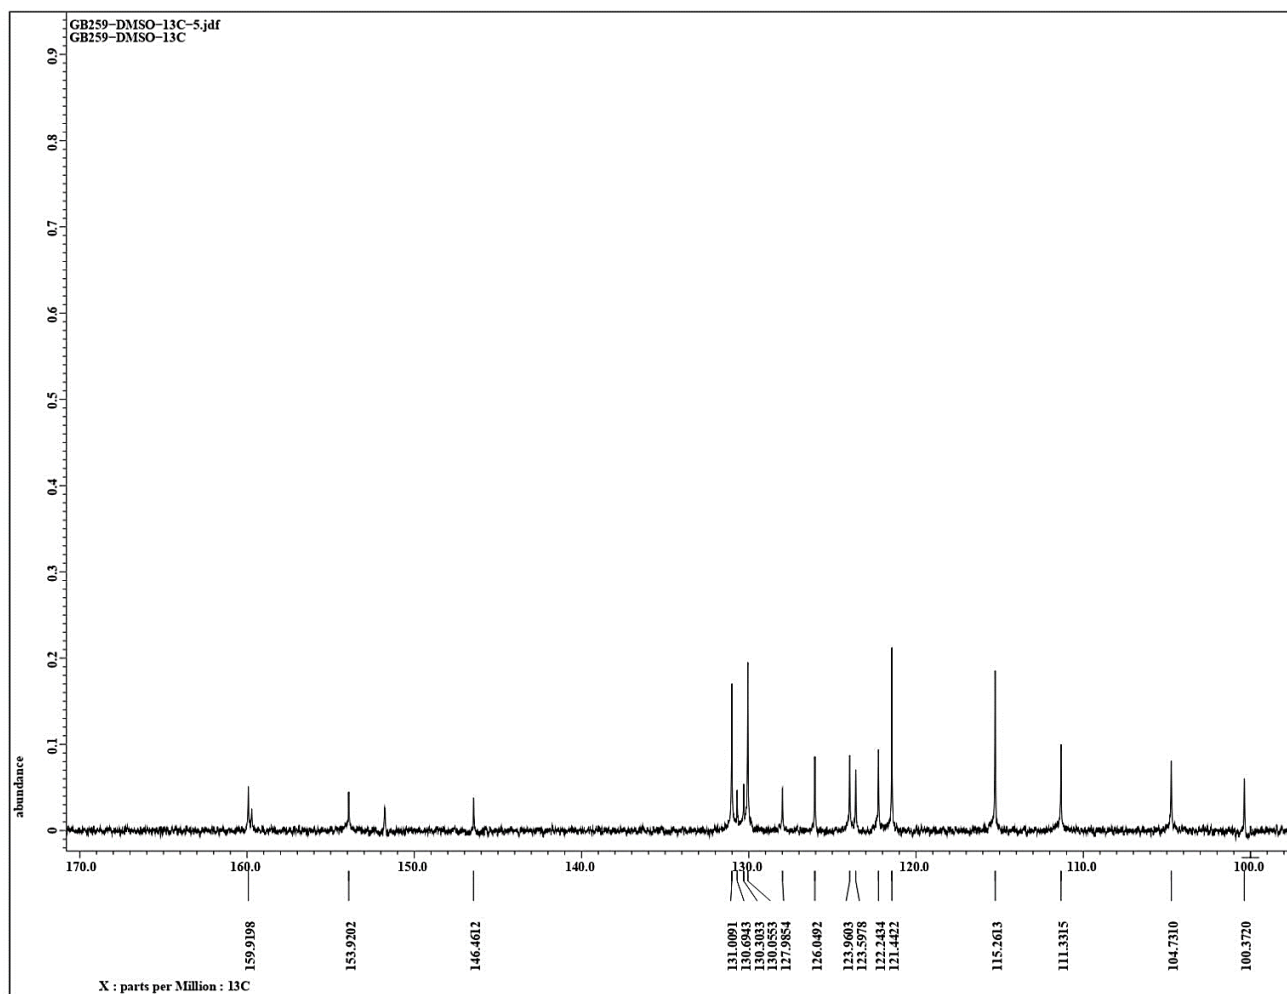

Figure S8. The  $^{13}\text{C}$  NMR spectrum (expansion) of 5a.

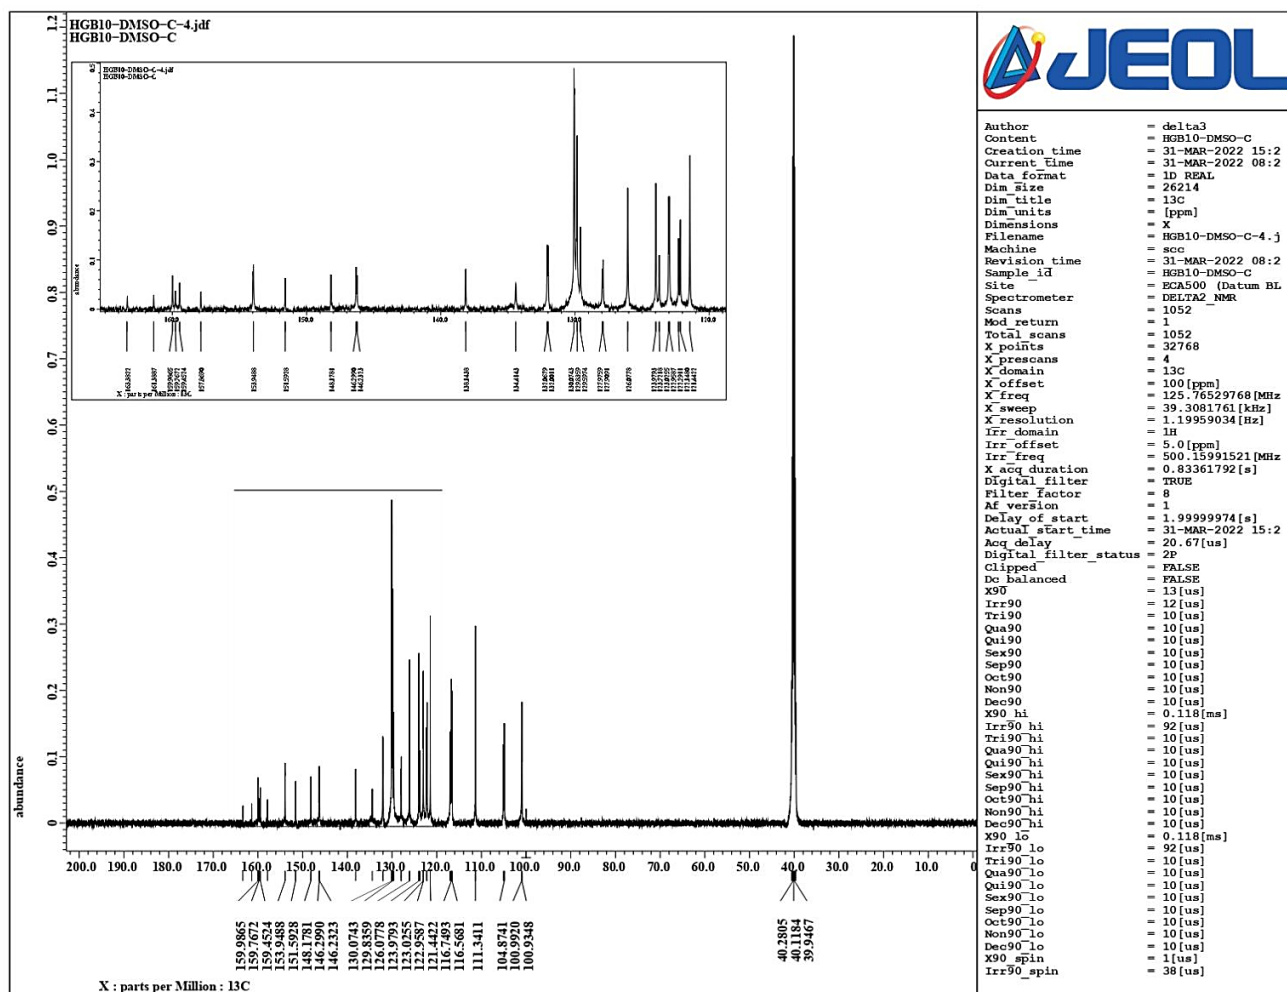Figure S9. The  $^{13}\text{C}$  NMR spectrum for the mixture containing **5b** and **6**.

Mohamed Bakr-HGB10-F-19-AS-DMSO

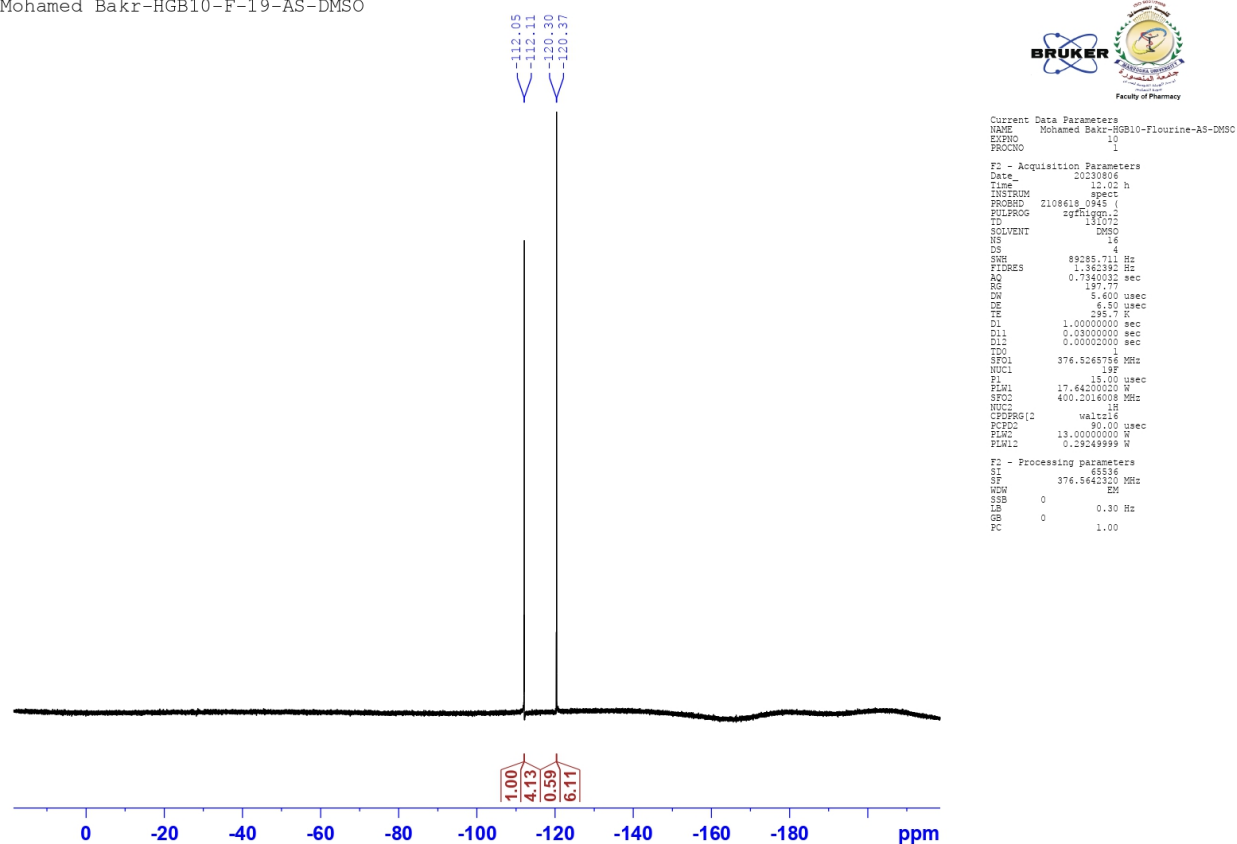Figure S10. The  $^{19}\text{F}$  NMR spectrum for the mixture containing **5b** and **6**.

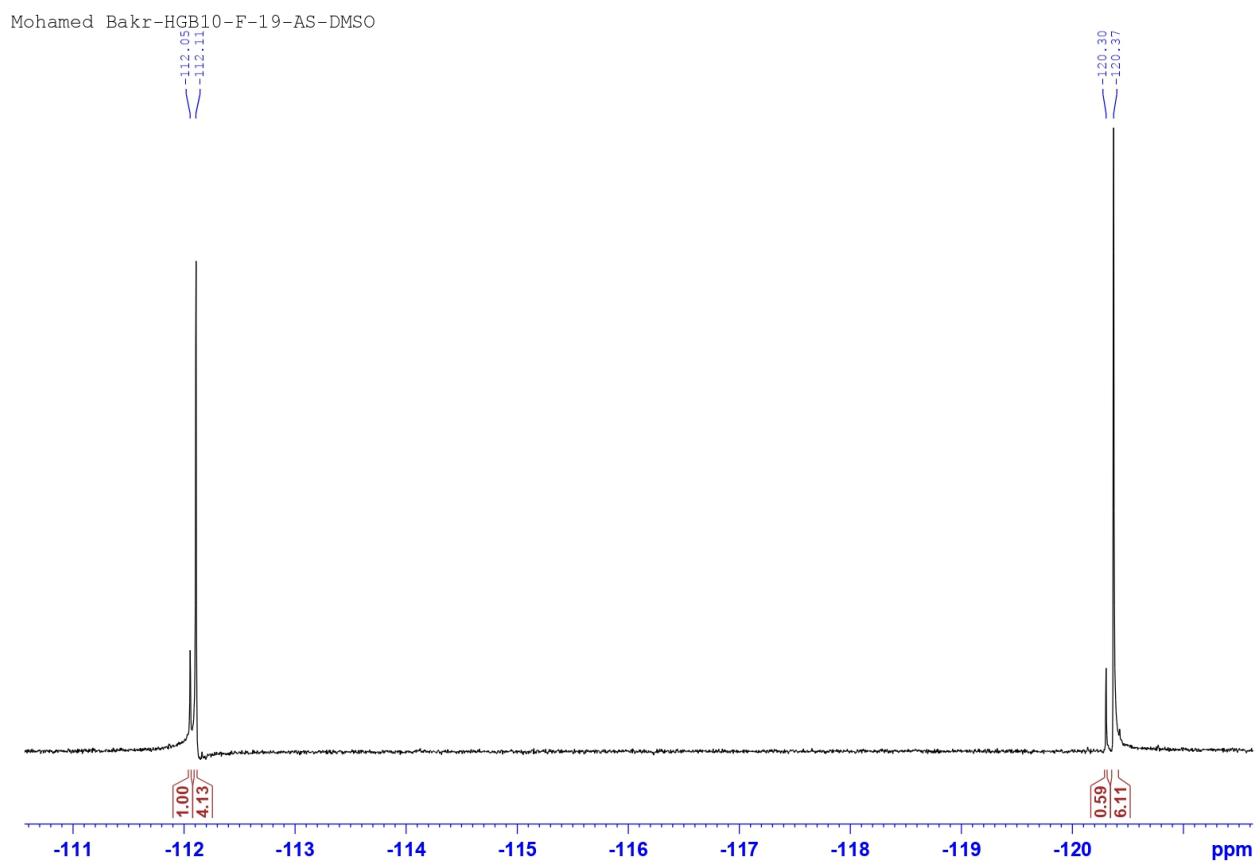

**Figure S11.** The  $^{19}\text{F}$  NMR spectrum for the mixture containing **5b** and **6**.
